# Supplementary material for: Catalytic asymmetric intramolecular propargylation of cyclopropanols to access the cuparane core
Source: Royal Society of Chemistry journal article supplement (doi:10.1039/d4sc02504k), 2024-01-01
Supplement: d4sc02504k1.pdf [file d4sc02504k1.pdf]

## Supplementary Information

### **Catalytic Asymmetric Intramolecular Propargylation of Cyclopropanols to Access the Cuparane Core**

Yankun Zhao, Hongya Yan, Yulian Zhang, Tao Zhou, Mengxing Tian, Chongzhou Zhang, Shan Yuan,  
Hanyue Qiu,\* Ling He, Min Zhang\*

Chongqing Key Laboratory of Natural Product Synthesis and Drug Research, Innovative Drug Research Center, School  
of Pharmaceutical Sciences, Chongqing University, Chongqing 401331, China.

\*Correspondence: hanyue.qiu@cqu.edu.cn (H.Q.); minzhang@cqu.edu.cn (M.Z.)

## Table of Contents

|                                                                  |            |
|------------------------------------------------------------------|------------|
| <b>1. General Information</b> .....                              | <b>S3</b>  |
| <b>2. Optimization of Reaction Conditions</b> .....              | <b>S4</b>  |
| 2.1 Table S1. Screening of the metal salts .....                 | <b>S4</b>  |
| 2.2 Table S2. Screening of the bases.....                        | <b>S4</b>  |
| 2.3 Table S3. Screening of the solvents .....                    | <b>S5</b>  |
| 2.4 Table S4. Screening of the ligands.....                      | <b>S5</b>  |
| <b>3. Preparation and Characterization Data of 2</b> .....       | <b>S6</b>  |
| 3.1 General procedure for the preparation of 2 .....             | <b>S6</b>  |
| 3.2 Characterization data of 2 .....                             | <b>S7</b>  |
| <b>4. Synthetic Applications</b> .....                           | <b>S32</b> |
| 4.1 Gram-scale reaction .....                                    | <b>S32</b> |
| 4.2 Transformations of compound 2h.....                          | <b>S33</b> |
| <b>5. Mechanism Studies</b> .....                                | <b>S36</b> |
| 5.1 Reaction of 1ah.....                                         | <b>S36</b> |
| 5.2 Free radical capture experiments .....                       | <b>S37</b> |
| 5.3 Non-linear effect experiments.....                           | <b>S37</b> |
| <b>6. Preparation and Characterization Data of Ligands</b> ..... | <b>S38</b> |
| 6.1 Preparation of 15.....                                       | <b>S39</b> |
| 6.2 Characterization data of 15 .....                            | <b>S39</b> |
| 6.3 Preparation of L12–L15.....                                  | <b>S41</b> |
| 6.4 Characterization data of L12–L15.....                        | <b>S41</b> |
| <b>7. Preparation and Characterization Data of 1</b> .....       | <b>S43</b> |
| 7.1 Preparation of 19.....                                       | <b>S43</b> |
| 7.2 Preparation of 1.....                                        | <b>S46</b> |
| 7.3 Characterization data of 19 and 1.....                       | <b>S47</b> |
| <b>8. Crystallographic Data</b> .....                            | <b>S75</b> |
| 8.1 Crystallographic data of 2n.....                             | <b>S76</b> |
| 8.2 Crystallographic data of 2af.....                            | <b>S77</b> |
| 8.3 Crystallographic data of 2ah.....                            | <b>S78</b> |
| 8.4 Crystallographic data of L12 .....                           | <b>S79</b> |
| <b>9. References</b> .....                                       | <b>S79</b> |



## 1. General Information

All commercially available reagents were used without further purification unless otherwise noted. All reactions were carried out under a nitrogen atmosphere in oven-dried glassware with magnetic stirring unless otherwise stated. All solvents employed in the reactions were distilled from appropriate drying agents prior to use.  $^1\text{H}$  NMR and  $^{13}\text{C}$  NMR spectra were obtained on an Agilent 400MR spectrometer or Agilent 600MR DD2 spectrometer at ambient temperature.  $^{19}\text{F}$  NMR was obtained on an Agilent 600MR spectrometer at ambient temperature.  $^1\text{H}$  NMR spectra were reported in ppm with either tetramethylsilane or the residual solvent resonance as the internal standard [ $\delta$  7.26 ( $\text{CHCl}_3$ ); TMS: 0.00 ppm].  $^{13}\text{C}$  NMR spectra were reported in ppm with residual solvent as the internal standard [ $\delta$  = 77.16 ppm ( $\text{CDCl}_3$ )]. Data were reported as follows: chemical shift ( $\delta$ , ppm), multiplicity (s = singlet, d = doublet, t = triplet, q = quartet, m = multiplet, dd = doublet of doublets, dt = doublet of triplets, td = triplet of doublets), coupling constant ( $J$ ) in hertz (Hz), and integration. IR spectra were recorded on a Bruker 100 FT-IR spectrometer and are reported in terms of frequency of absorption ( $\text{cm}^{-1}$ ). ESI-HRMS was performed on Bruker Solari X 7.0 T spectrometer. APCI-HRMS was performed on Thermo UHPLC-Q Exactive Plus spectrometer. X-ray crystallography analysis of single crystals was performed on an Agilent SuperNova-CCD X-Ray diffractometer and XtaLAB Synergy. Chiral high-performance liquid chromatography (HPLC) analysis was performed using an Agilent 1260 with commercial ChiralPak  $4.6 \times 250$  mm columns. Melting points were recorded on a SGW X-4A apparatus. Optical rotations were measured with a Rudolph polarimeter.



## 2. Optimization of Reaction Conditions

### 2.1 Table S1. Screening of the metal salts<sup>a</sup>

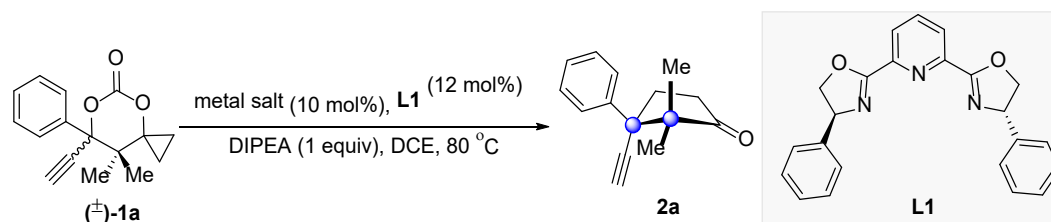

| entry | metal salt                            | yield (%) <sup>b</sup> | ee (%) <sup>c</sup> |
|-------|---------------------------------------|------------------------|---------------------|
| 1     | Cu(OTf) <sub>2</sub>                  | 40                     | 36                  |
| 2     | Cu(OAc) <sub>2</sub>                  | 55                     | 2                   |
| 3     | CuCl <sub>2</sub>                     | 20                     | 30                  |
| 4     | CuBr <sub>2</sub>                     | 42                     | 38                  |
| 5     | CuBr                                  | 35                     | 36                  |
| 6     | CuI                                   | 55                     | 36                  |
| 7     | CuCl                                  | 15                     | 34                  |
| 8     | CuOTf                                 | 22                     | 10                  |
| 9     | Cu(MeCN) <sub>4</sub> BF <sub>4</sub> | 67                     | 64                  |
| 10    | Cu(MeCN) <sub>4</sub> PF <sub>6</sub> | 75                     | 66                  |

<sup>a</sup>Conditions unless otherwise stated: **(±)-1a** (0.1 mmol), metal salts (10 mol%), **L1** (12 mol%), DIPEA (1 equiv), DCE (4 mL), 80 °C, 48 h. <sup>b</sup>Isolated yield of **2a**. <sup>c</sup>Determined by chiral HPLC analysis.

### 2.2 Table S2. Screening of the bases<sup>a</sup>

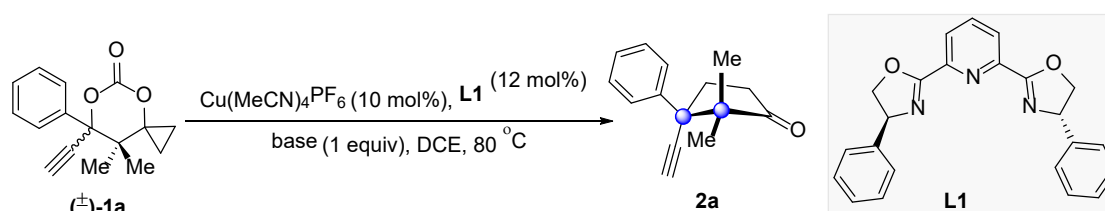

| entry | base                            | yield (%) <sup>b</sup> | ee (%) <sup>c</sup> |
|-------|---------------------------------|------------------------|---------------------|
| 1     | DIPEA                           | 75                     | 66                  |
| 2     | Et <sub>3</sub> N               | 30                     | 48                  |
| 3     | DBU                             | /                      | /                   |
| 4     | Na <sub>2</sub> CO <sub>3</sub> | 48                     | 60                  |
| 5     | K <sub>2</sub> CO <sub>3</sub>  | 19                     | 8                   |
| 6     | Cs <sub>2</sub> CO <sub>3</sub> | trace                  | trace               |
| 7     | Cy <sub>2</sub> NMe             | 76                     | 66                  |
| 8     | NaHCO <sub>3</sub>              | 86                     | 68                  |
| 9     | pyridine                        | 19                     | 34                  |
| 10    | DMAP                            | 8                      | 0                   |
| 11    | PhONa                           | 29                     | 30                  |

|    |                                   |    |    |
|----|-----------------------------------|----|----|
| 12 | 4-methylmorpholine                | 29 | 66 |
| 13 | 1,8-bis(dimethylamino)naphthalene | 86 | 38 |

<sup>a</sup>Conditions unless otherwise stated: ( $\pm$ )-**1a** (0.1 mmol), Cu(MeCN)<sub>4</sub>PF<sub>6</sub> (10 mol%), **L1** (12 mol%), base (1 equiv), DCE (4 mL), 80 °C, 48 h. <sup>b</sup>Isolated yield of **2a**. <sup>c</sup>Determined by chiral HPLC analysis.

### 2.3 Table S3. Screening of the solvents<sup>a</sup>

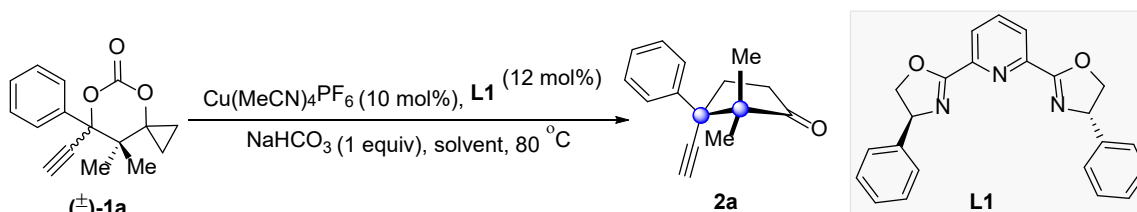

| entry | solvent           | yield (%) <sup>b</sup> | ee (%) <sup>c</sup> |
|-------|-------------------|------------------------|---------------------|
| 1     | THF               | 29                     | 32                  |
| 2     | 1, 4-dioxane      | 38                     | 44                  |
| 3     | MeOH              | 38                     | 44                  |
| 4     | CHCl <sub>3</sub> | 60                     | 58                  |
| 5     | MeCN              | 21                     | 46                  |
| 6     | toluene           | 33                     | 46                  |
| 7     | EtOAc             | 33                     | 52                  |
| 8     | DCE               | 86                     | 68                  |
| 9     | DMF               | /                      | /                   |
| 10    | TFE               | 45                     | -52                 |
| 11    | HFIP              | 22                     | -40                 |
| 12    | PhCF <sub>3</sub> | 56                     | 66                  |

<sup>a</sup>Conditions unless otherwise stated: ( $\pm$ )-**1a** (0.1 mmol), Cu(MeCN)<sub>4</sub>PF<sub>6</sub> (10 mol%), **L1** (12 mol%), NaHCO<sub>3</sub> (1 equiv), solvent (4 mL), 80 °C, 48 h. <sup>b</sup>Isolated yield of **2a**. <sup>c</sup>Determined by chiral HPLC analysis.

### 2.4 Table S4. Screening of the ligands<sup>a</sup>

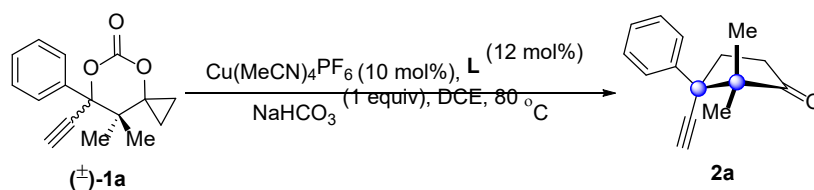

| entry | ligand    | yield (%) <sup>b</sup> | ee (%) <sup>c</sup> |
|-------|-----------|------------------------|---------------------|
| 1     | <b>L1</b> | 86                     | 68                  |
| 2     | <b>L2</b> | 86                     | 64                  |
| 3     | <b>L3</b> | 19                     | 40                  |
| 4     | <b>L4</b> | 67                     | 15                  |
| 5     | <b>L5</b> | 57                     | -22                 |
| 6     | <b>L6</b> | 48                     | 6                   |

|                 |               |    |    |
|-----------------|---------------|----|----|
| 7               | <b>L7-L10</b> | 0  | /  |
| 8               | <b>L11</b>    | 85 | 90 |
| 9               | <b>L12</b>    | 90 | 94 |
| 10 <sup>d</sup> | <b>L12</b>    | 95 | 95 |
| 11 <sup>d</sup> | <b>L13</b>    | 85 | 95 |
| 12 <sup>d</sup> | <b>L14</b>    | 85 | 86 |
| 13 <sup>d</sup> | <b>L15</b>    | 20 | 70 |

<sup>a</sup>Conditions unless otherwise stated: ( $\pm$ )-**1a** (0.1 mmol), Cu(MeCN)<sub>4</sub>PF<sub>6</sub> (10 mol%), **L** (12 mol%), NaHCO<sub>3</sub> (1 equiv), DCE (4 mL), 80 °C, 48 h. <sup>b</sup>Isolated yield of **2a**. <sup>c</sup>Determined by chiral HPLC analysis. <sup>d</sup>Reaction was conducted at 60 °C.

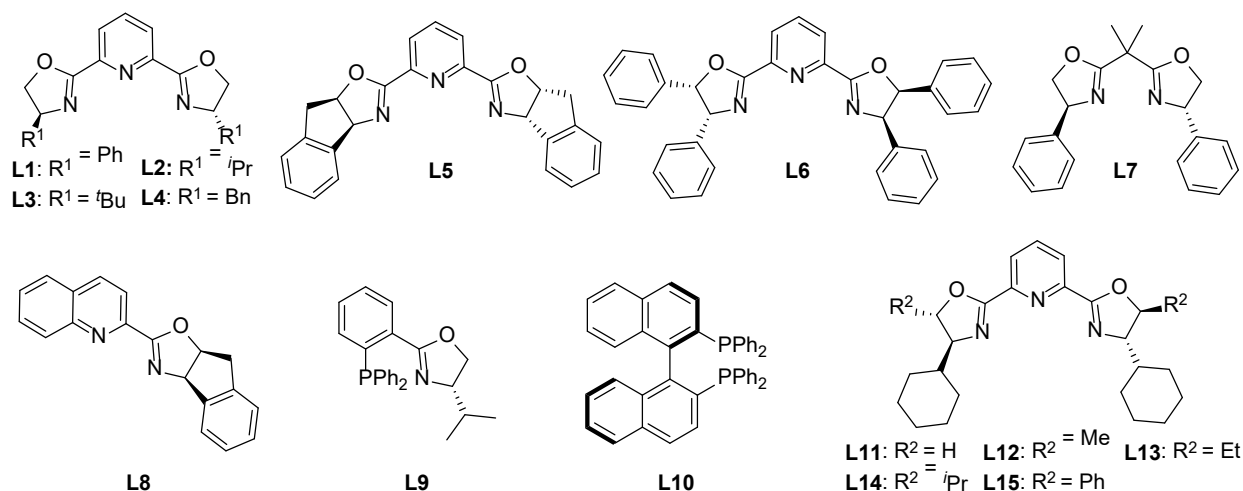

### 3. Preparation and Characterization Data of 2

#### 3.1 General procedure for the preparation of 2

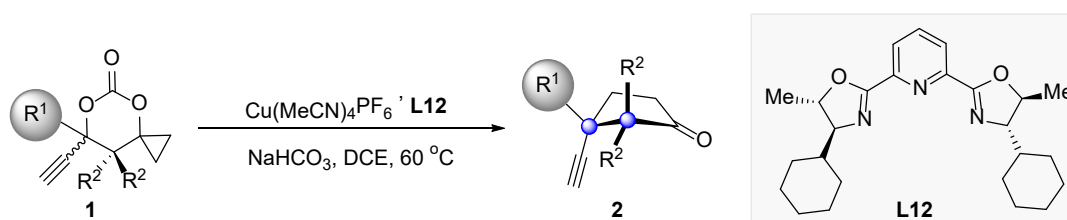

A mixture of Cu(MeCN)<sub>4</sub>PF<sub>6</sub> (3.7 mg, 0.01 mmol, 10 mol%) and **L12** (4.9 mg, 0.012 mmol, 12 mol%) in anhydrous DCE (4 mL) in an oven-dried glass tube was stirred at room temperature for 30 min under a nitrogen atmosphere (balloon). Substrate **1** (0.1 mmol) and NaHCO<sub>3</sub> (8.4 mg, 0.1 mmol, 1 equiv) was then added. The resulting mixture was stirred at 60 °C for 24–48 h until **1** was fully consumed as monitored by the TLC analysis. The crude product was concentrated in vacuo, purified by flash column chromatography on silica gel (petroleum ether/EtOAc) to afford compound **2**. The *ee* values were determined by chiral HPLC analysis of the isolated products.

## 3.2 Characterization data of 2

### (S)-3-ethynyl-2,2-dimethyl-3-phenylcyclopentan-1-one (2a)

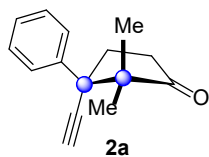

Purification by flash column chromatography on silica gel (petroleum ether/EtOAc = 10 : 1,  $R_f$  = 0.4) afforded **2a** (20 mg, 95%) as a white solid.  $^1\text{H NMR}$  (600 MHz,  $\text{CDCl}_3$ )  $\delta$  7.52 (d,  $J$  = 7.5 Hz, 2H), 7.38 (t,  $J$  = 7.6 Hz, 2H), 7.31 (t,  $J$  = 7.3 Hz, 1H), 2.80–2.71 (m, 2H), 2.61–2.54 (m, 1H), 2.41–2.32 (m, 2H), 1.27 (s, 3H), 0.61 (s, 3H) ppm.  $^{13}\text{C NMR}$  (150 MHz,  $\text{CDCl}_3$ )  $\delta$  219.8, 138.8, 128.3, 127.5, 127.5, 87.4, 73.5, 54.3, 51.8, 34.6, 29.6, 20.4, 19.9 ppm. **IR** (KBr):  $\nu_{\text{max}}$  = 3251, 2976, 2931, 1738, 1464, 1382, 1267, 696  $\text{cm}^{-1}$ . **HRMS** (APCI) ( $m/z$ ): Calcd for  $\text{C}_{15}\text{H}_{16}\text{O}$ ,  $[\text{M}+\text{H}]^+$ , 213.1274; found: 213.1267.  $[\alpha]_{\text{D}}^{25}$ :  $-38.3$  ( $c$  0.1,  $\text{CHCl}_3$ ). **m.p.**: 140.0–141.0  $^{\circ}\text{C}$ . **HPLC** (Chiral pak AS-H,  $i$ -PrOH/ $n$ -hexane = 10 : 90, flow rate = 1.0 mL/min, wave length = 210 nm):  $t_{\text{R}}$  = 5.822 min (minor),  $t_{\text{R}}$  = 9.698 min (major) (95% *ee*).

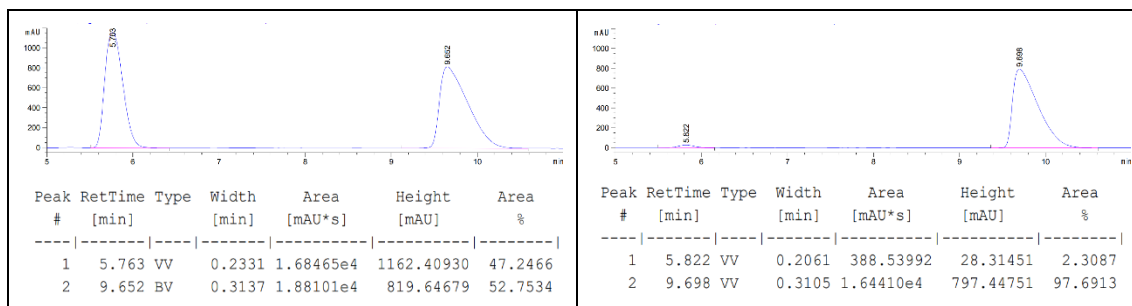

### (S)-3-ethynyl-3-(4-methoxyphenyl)-2,2-dimethylcyclopentan-1-one (2b)

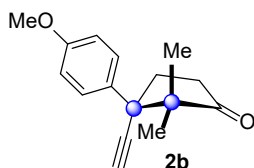

Purification by flash column chromatography on silica gel (petroleum ether/EtOAc = 10 : 1,  $R_f$  = 0.48) afforded **2b** (21.8 mg, 90%) as a colorless oil.  $^1\text{H NMR}$  (600 MHz,  $\text{CDCl}_3$ )  $\delta$  7.42 (d,  $J$  = 7.8 Hz, 2H), 6.91 (d,  $J$  = 7.8 Hz, 2H), 3.82 (s, 3H), 2.78–2.67 (m, 2H), 2.60–2.51 (m, 1H), 2.42–2.28 (m, 2H), 1.24 (s, 3H), 0.61 (s, 3H) ppm.  $^{13}\text{C NMR}$  (150 MHz,  $\text{CDCl}_3$ )  $\delta$  220.0, 159.0, 130.9, 128.7, 113.7, 87.7, 73.4, 55.4, 54.3, 51.2, 34.7, 29.9, 20.4, 19.8 ppm. **IR** (KBr):  $\nu_{\text{max}}$  = 3288, 2969, 2930, 1741, 1513, 1252, 1035, 832  $\text{cm}^{-1}$ . **HRMS** (APCI) ( $m/z$ ): Calcd for  $\text{C}_{16}\text{H}_{18}\text{O}_2$ ,  $[\text{M}+\text{Na}]^+$ , 265.1199; found: 265.1204.  $[\alpha]_{\text{D}}^{25}$ :  $-96.4$  ( $c$  0.1,  $\text{CHCl}_3$ ). **HPLC** (Chiral pak AS-H,  $i$ -PrOH/ $n$ -hexane = 10 : 90, flow rate = 1.0 mL/min, wave length = 210 nm):  $t_{\text{R}}$  = 7.731 min (minor),  $t_{\text{R}}$  = 18.260 min (major) (94%

ee).

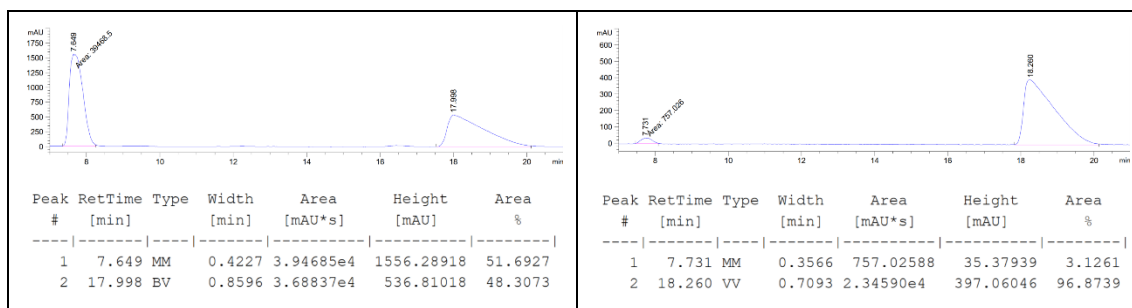

### (S)-3-(4-((*tert*-butyldimethylsilyloxy)phenyl)-3-ethynyl-2,2-dimethylcyclopentan-1-one (2c)

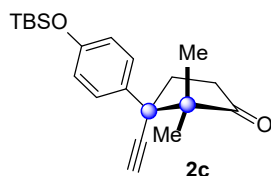

Purification by flash column chromatography on silica gel (petroleum ether/EtOAc = 10 : 1,  $R_f = 0.6$ ) afforded **2c** (32.9 mg, 96%) as a white solid.  $^1\text{H NMR}$  (600 MHz,  $\text{CDCl}_3$ )  $\delta$  7.35 (d,  $J = 8.4$  Hz, 2H), 6.83 (d,  $J = 8.4$  Hz, 2H), 2.76–2.67 (m, 2H), 2.59–2.51 (m, 1H), 2.38–2.29 (m, 2H), 1.23 (s, 3H), 0.99 (s, 9H), 0.59 (s, 3H), 0.20 (s, 6H) ppm.  $^{13}\text{C NMR}$  (150 MHz,  $\text{CDCl}_3$ )  $\delta$  220.1, 155.1, 131.4, 128.6, 119.8, 87.7, 73.3, 54.3, 51.3, 34.7, 29.8, 25.8, 20.4, 19.8, 18.3,  $-4.3$  ppm. IR (KBr):  $\nu_{\text{max}} = 3304, 2957, 2859, 1743, 1510, 1260, 1084, 917, 840$   $\text{cm}^{-1}$ . HRMS (ESI) (m/z): Calcd for  $\text{C}_{21}\text{H}_{30}\text{O}_2\text{Si}$ ,  $[\text{M}+\text{Na}]^+$ , 365.1907; found: 365.1903.  $[\alpha]_{\text{D}}^{25}$ :  $-79.4$  ( $c$  0.32,  $\text{CHCl}_3$ ). m.p.: 94.2–96.6 °C. HPLC (Chiral pak AS-H, *i*-PrOH/*n*-hexane = 1 : 99, flow rate = 1.0 mL/min, wave length = 210 nm):  $t_{\text{R}} = 5.602$  min (minor),  $t_{\text{R}} = 8.571$  min (major) (95% ee).

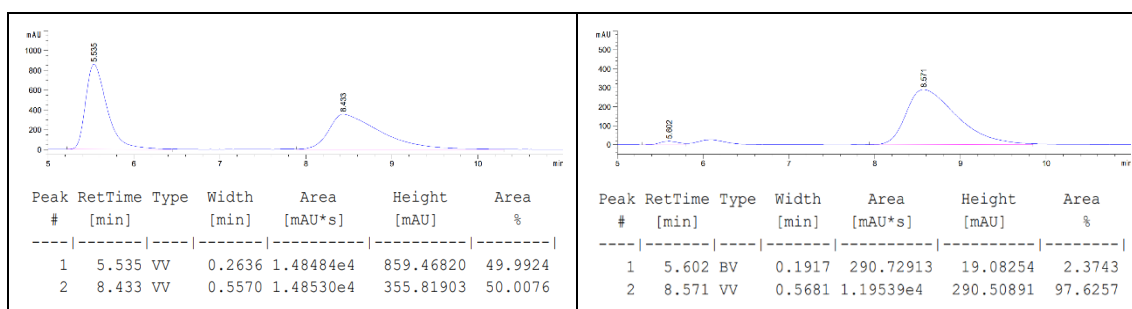

### (S)-3-ethynyl-2,2-dimethyl-3-(4-morpholinophenyl)cyclopentan-1-one (2d)

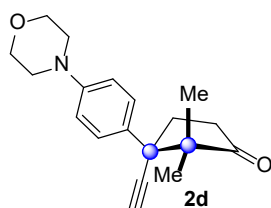

Purification by flash column chromatography on silica gel (petroleum ether/EtOAc = 3 : 1,  $R_f$  = 0.5) afforded **2d** (28 mg, 94%) as a white solid.  $^1\text{H NMR}$  (400 MHz,  $\text{CDCl}_3$ )  $\delta$  7.40 (d,  $J$  = 8.8 Hz, 2H), 6.91 (d,  $J$  = 8.8 Hz, 2H), 3.90–3.83 (m, 4H), 3.20–3.13 (m, 4H), 2.78–2.66 (m, 2H), 2.61–2.49 (m, 1H), 2.40–2.25 (m, 2H), 1.24 (s, 3H), 0.62 (s, 3H) ppm.  $^{13}\text{C NMR}$  (100 MHz,  $\text{CDCl}_3$ )  $\delta$  220.2, 150.5, 130.0, 128.4, 115.2, 87.7, 73.3, 67.0, 54.3, 51.2, 49.2, 34.7, 29.8, 20.4, 19.9 ppm. **IR** (KBr):  $\nu_{\text{max}}$  = 3288, 2964, 2925, 1739, 1516, 1229, 1121, 929, 824  $\text{cm}^{-1}$ . **HRMS** (ESI) ( $m/z$ ): Calcd for  $\text{C}_{19}\text{H}_{23}\text{NO}_2$ ,  $[\text{M}+\text{H}]^+$ , 298.1802; found: 298.1791.  $[\alpha]_{\text{D}}^{25}$ :  $-92.3$  ( $c$  0.26,  $\text{CHCl}_3$ ). **m.p.**: 113.4–135.1  $^{\circ}\text{C}$ . **HPLC** (Chiral pak AS-H,  $i$ -PrOH/ $n$ -hexane = 10 : 90, flow rate = 1.0 mL/min, wave length = 210 nm):  $t_{\text{R}}$  = 18.063 min (minor),  $t_{\text{R}}$  = 28.656 min (major) (86% *ee*).

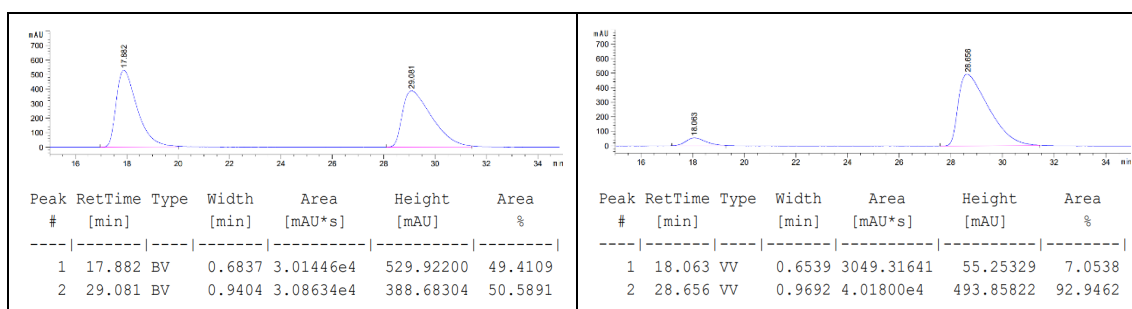

### (S)-3-ethynyl-3-(4-fluorophenyl)-2,2-dimethylcyclopentan-1-one (**2e**)

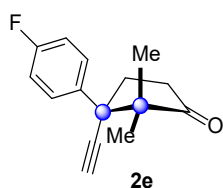

Purification by flash column chromatography on silica gel (petroleum ether/EtOAc = 10 : 1,  $R_f$  = 0.35) afforded **2e** (22.5 mg, 98%) as a white solid.  $^1\text{H NMR}$  (600 MHz,  $\text{CDCl}_3$ )  $\delta$  7.50–7.46 (m, 2H), 7.07 (t,  $J$  = 8.7 Hz, 2H), 2.78–2.67 (m, 2H), 2.63–2.52 (m, 1H), 2.42–2.30 (m, 2H), 1.25 (s, 3H), 0.60 (s, 3H) ppm.  $^{13}\text{C NMR}$  (150 MHz,  $\text{CDCl}_3$ )  $\delta$  219.5, 162.2 (d,  $J_{\text{CF}}$  = 246.7 Hz), 134.6 (d,  $J_{\text{CF}}$  = 3.1 Hz), 129.2 (d,  $J_{\text{CF}}$  = 8.0 Hz), 115.2 (d,  $J_{\text{CF}}$  = 21.3 Hz), 87.2, 73.8, 54.3, 51.4, 34.6, 29.9, 20.4, 19.8 ppm.  $^{19}\text{F NMR}$  (564 MHz,  $\text{CDCl}_3$ )  $\delta$   $-115.43$  (s, 1F) ppm. **IR** (KBr):  $\nu_{\text{max}}$  = 3267, 2966, 2921, 1728, 1510, 1267, 1087, 703  $\text{cm}^{-1}$ . **HRMS** (ESI) ( $m/z$ ): Calcd for  $\text{C}_{15}\text{H}_{15}\text{FO}$ ,  $[\text{M}-\text{H}]^-$ , 229.1034; found: 229.1034.  $[\alpha]_{\text{D}}^{25}$ :  $-152.0$  ( $c$  0.41,  $\text{CHCl}_3$ ). **m.p.**: 104.2–106.3  $^{\circ}\text{C}$ . **HPLC** (Chiral pak AS-H,  $i$ -PrOH/ $n$ -hexane = 10 : 90, flow rate = 1.0 mL/min, wave length = 210 nm):  $t_{\text{R}}$  = 6.548 min (minor),  $t_{\text{R}}$  = 14.529 min (major) (95% *ee*).

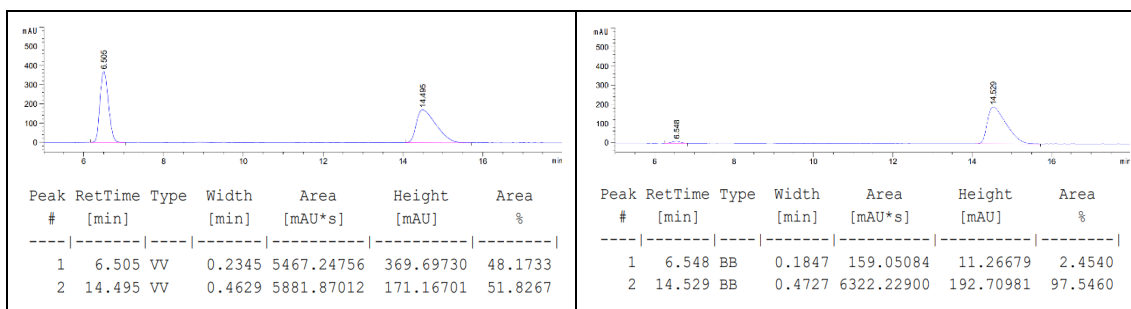

### (S)-3-(4-chlorophenyl)-3-ethynyl-2,2-dimethylcyclopentan-1-one (**2f**)

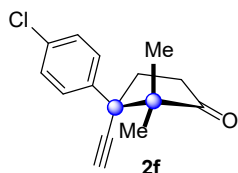

Purification by flash column chromatography on silica gel (petroleum ether/EtOAc = 10 : 1,  $R_f$  = 0.4) afforded **2f** (22.7 mg, 92%) as a white solid.  $^1\text{H NMR}$  (600 MHz,  $\text{CDCl}_3$ )  $\delta$  7.44 (d,  $J$  = 8.2 Hz, 2H), 7.35 (d,  $J$  = 8.3 Hz, 2H), 2.77–2.68 (m, 2H), 2.61–2.53 (m, 1H), 2.43–2.32 (m, 2H), 1.24 (s, 3H), 0.60 (s, 3H) ppm.  $^{13}\text{C NMR}$  (150 MHz,  $\text{CDCl}_3$ )  $\delta$  219.3, 137.5, 133.6, 129.0, 128.5, 86.9, 73.9, 54.2, 51.5, 34.6, 29.8, 20.4, 19.8 ppm. IR (KBr):  $\nu_{\text{max}}$  = 3066, 2970, 2919, 1732, 1618, 1468, 1401, 1381, 1134, 1011, 842, 672, 522, 475  $\text{cm}^{-1}$ . HRMS (APCI) ( $m/z$ ): Calcd for  $\text{C}_{15}\text{H}_{15}\text{ClO}$ ,  $[\text{M}+\text{H}]^+$ , 247.0884; found: 247.0876.  $[\alpha]_D^{25}$ :  $-134$  ( $c$  0.06,  $\text{CHCl}_3$ ). **m.p.**: 114.0–115.4  $^\circ\text{C}$ . HPLC (Chiral pak AS-H,  $i$ -PrOH/ $n$ -hexane = 10 : 90, flow rate = 1.0 mL/min, wave length = 210 nm):  $t_R$  = 6.825 min (minor),  $t_R$  = 20.086 min (major) (95% *ee*).

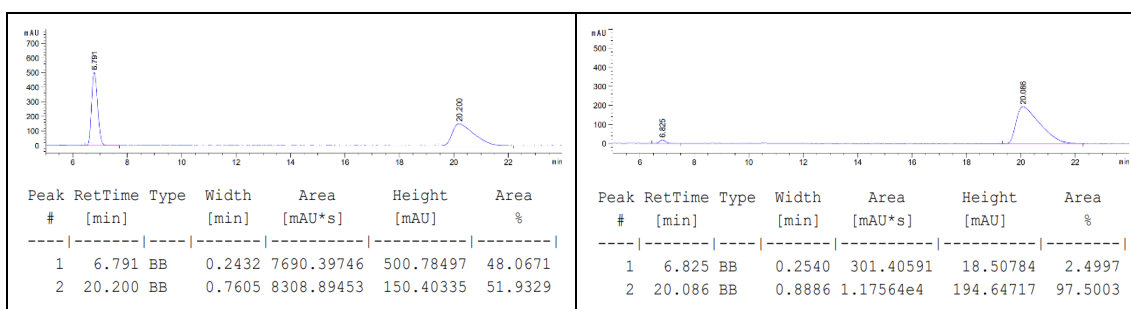

### (S)-3-(4-bromophenyl)-3-ethynyl-2,2-dimethylcyclopentan-1-one (**2g**)

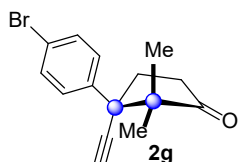

Purification by flash column chromatography on silica gel (petroleum ether/EtOAc = 10 : 1,  $R_f$  = 0.25) afforded **2g** (25 mg, 86%) as a white solid.  $^1\text{H NMR}$  (400 MHz,  $\text{CDCl}_3$ )  $\delta$  7.50 (d,  $J$  = 8.4 Hz, 2H), 7.38 (d,  $J$  = 8.4 Hz, 2H), 2.79–2.66 (m, 2H), 2.64–2.51 (m, 1H), 2.43–2.29 (m, 2H), 1.24 (s, 3H), 0.60 (s, 3H) ppm.  $^{13}\text{C NMR}$  (100 MHz,

CDCl<sub>3</sub>)  $\delta$  219.3, 137.9, 131.4, 129.3, 121.7, 86.8, 73.9, 54.2, 51.5, 34.6, 29.6, 20.4, 19.8 ppm. **IR** (KBr):  $\nu_{\max}$  = 3291, 2972, 2926, 1740, 1479, 1079, 826, 656 cm<sup>-1</sup>. **HRMS** (APCI) (m/z): Calcd for C<sub>15</sub>H<sub>15</sub>BrO, [M+H]<sup>+</sup>, 291.0379; found: 291.0371.  $[\alpha]_D^{25}$ : -41.1 (*c* 0.12, CHCl<sub>3</sub>). **m.p.**: 220.3–223.5 °C. **HPLC** (Chiral pak AS-H, *i*-PrOH/*n*-hexane = 10 : 90, flow rate = 1.0 mL/min, wave length = 210 nm):  $t_R$  = 7.206 min (minor),  $t_R$  = 22.763 min (major) (92% *ee*).

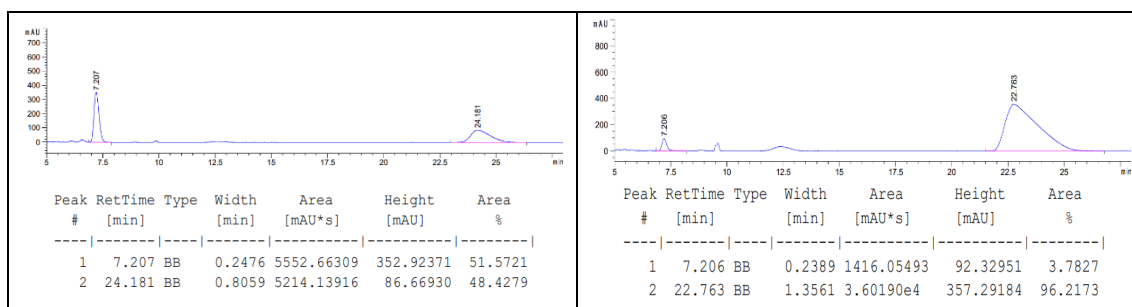

### (S)-3-ethynyl-2,2-dimethyl-3-(p-tolyl)cyclopentan-1-one (2h)

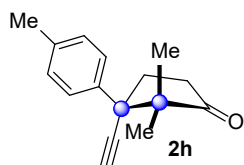

Purification by flash column chromatography on silica gel (petroleum ether/EtOAc = 10 : 1,  $R_f$  = 0.42) afforded **2h** (22 mg, 97%) as a white solid. <sup>1</sup>H NMR (600 MHz, CDCl<sub>3</sub>)  $\delta$  7.40 (d, *J* = 7.8 Hz, 2H), 7.18 (d, *J* = 7.8 Hz, 2H), 2.77–2.69 (m, 2H), 2.60–2.51 (m, 1H), 2.39–2.30 (m, 5H), 1.26 (s, 3H), 0.61 (s, 3H) ppm. <sup>13</sup>C NMR (150 MHz, CDCl<sub>3</sub>)  $\delta$  220.0, 137.2, 135.8, 129.0, 127.5, 87.6, 73.3, 54.2, 51.5, 34.7, 29.7, 21.1, 20.4, 19.9 ppm. **IR** (KBr):  $\nu_{\max}$  = 3304, 2974, 2932, 1741, 1402, 1085, 628 cm<sup>-1</sup>. **HRMS** (APCI) (m/z): Calcd for C<sub>16</sub>H<sub>18</sub>O, [M+H]<sup>+</sup>, 227.1430; found: 227.1421.  $[\alpha]_D^{25}$ : -117.2 (*c* 0.42, CHCl<sub>3</sub>). **m.p.**: 74.3–75.7 °C. **HPLC** (Chiral pak AS-H, *i*-PrOH/*n*-hexane = 10 : 90, flow rate = 1.0 mL/min, wave length = 210 nm):  $t_R$  = 5.644 min (minor),  $t_R$  = 11.646 min (major) (96% *ee*).

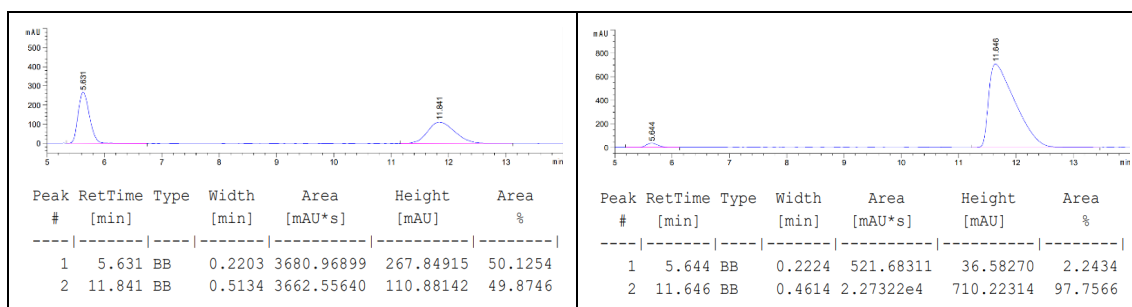

### (S)-3-ethynyl-2,2-dimethyl-3-(4-(trifluoromethyl)phenyl)cyclopentan-1-one (2i)



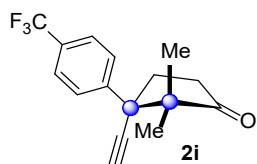

Purification by flash column chromatography on silica gel (petroleum ether/EtOAc = 10 : 1,  $R_f$  = 0.23) afforded **2i** (21.6 mg, 77%) as a white solid.  $^1\text{H NMR}$  (400 MHz,  $\text{CDCl}_3$ )  $\delta$  7.64 (s, 4H), 2.85–2.70 (m, 2H), 2.67–2.52 (m, 1H), 2.49–2.28 (m, 2H), 1.27 (s, 3H), 0.61 (s, 3H) ppm.  $^{13}\text{C NMR}$  (100 MHz,  $\text{CDCl}_3$ )  $\delta$  219.0, 143.0, 128.0, 125.3 (q,  $J_{\text{CF}}$  = 8.8 Hz), 86.6, 74.2, 54.4, 51.9, 34.6, 29.7, 20.4, 19.8 ppm.  $^{19}\text{F NMR}$  (564 MHz,  $\text{CDCl}_3$ )  $\delta$  -62.6 (s, 3F) ppm. **IR** (KBr):  $\nu_{\text{max}}$  = 3302, 2971, 2925, 1744, 1328, 1169, 1125, 1076, 839  $\text{cm}^{-1}$ . **HRMS** (ESI) (m/z): Calcd for  $\text{C}_{16}\text{H}_{15}\text{F}_3\text{O}$ ,  $[\text{M}-\text{H}]^-$ , 279.1002; found: 279.1007.  $[\alpha]_{\text{D}}^{25}$ : -100.3 ( $c$  0.17,  $\text{CHCl}_3$ ). **m.p.**: 172.2–174.5 °C. **HPLC** (Chiral pak AS-H, *i*-PrOH/*n*-hexane = 10 : 90, flow rate = 1.0 mL/min, wave length = 210 nm):  $t_{\text{R}}$  = 5.764 min (minor),  $t_{\text{R}}$  = 19.978 min (major) (94% *ee*).

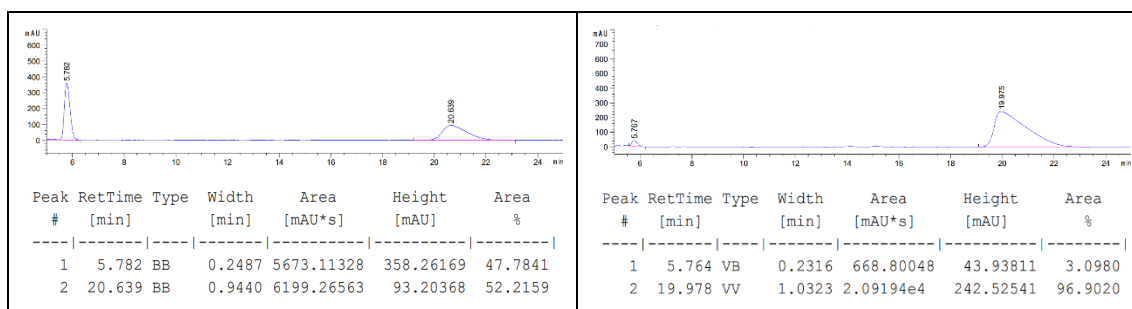

### (S)-3-([1,1'-biphenyl]-4-yl)-3-ethynyl-2,2-dimethylcyclopentan-1-one (**2j**)

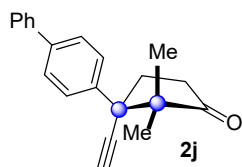

Purification by flash column chromatography on silica gel (petroleum ether/EtOAc = 10 : 1,  $R_f$  = 0.42) afforded **2j** (27.4 mg, 95%) as a white solid.  $^1\text{H NMR}$  (600 MHz,  $\text{CDCl}_3$ )  $\delta$  7.62–7.58 (m, 6H), 7.46 (t,  $J$  = 7.3 Hz, 2H), 7.37 (t,  $J$  = 7.3 Hz, 1H), 2.84–2.73 (m, 2H), 2.64–2.57 (m, 1H), 2.45–2.36 (m, 2H), 1.32 (s, 3H), 0.68 (s, 3H) ppm.  $^{13}\text{C NMR}$  (150 MHz,  $\text{CDCl}_3$ )  $\delta$  219.8, 140.6, 140.4, 137.9, 128.9, 128.0, 127.6, 127.2, 127.0, 87.4, 73.6, 54.4, 51.7, 34.7, 29.8, 20.5, 19.9 ppm. **IR** (KBr):  $\nu_{\text{max}}$  = 3287, 2964, 2926, 1743, 1402, 1261, 1084, 780  $\text{cm}^{-1}$ . **HRMS** (APCI) (m/z): Calcd for  $\text{C}_{21}\text{H}_{20}\text{O}$ ,  $[\text{M}+\text{H}]^+$ , 289.1587; found: 289.1577.  $[\alpha]_{\text{D}}^{25}$ : -140.7 ( $c$  0.69,  $\text{CHCl}_3$ ). **m.p.**: 131.1–132.2 °C. **HPLC** (Chiral pak AS-H, *i*-PrOH/*n*-hexane = 10 : 90, flow rate = 1.0 mL/min, wave length = 210 nm):  $t_{\text{R}}$  = 7.737 min (minor),  $t_{\text{R}}$  = 20.378 min (major) (95% *ee*).

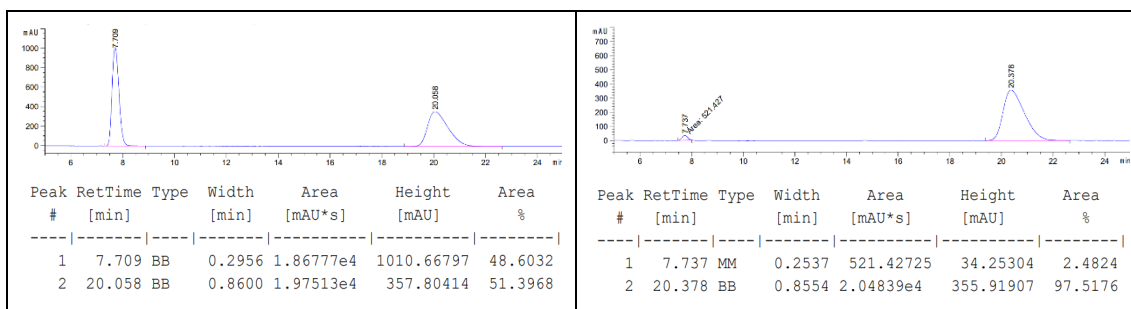

### (S)-3-ethynyl-3-(3-methoxyphenyl)-2,2-dimethylcyclopentan-1-one (**2k**)

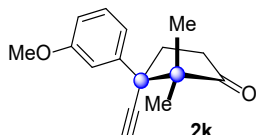

Purification by flash column chromatography on silica gel (petroleum ether/EtOAc = 10 : 1,  $R_f$  = 0.26) afforded **2k** (21.8 mg, 90%) as a colorless oil.  $^1\text{H NMR}$  (600 MHz,  $\text{CDCl}_3$ )  $\delta$  7.29 (t,  $J$  = 8.0 Hz, 1H), 7.08 (d,  $J$  = 7.0 Hz, 2H), 6.85 (d,  $J$  = 7.7 Hz, 1H), 3.83 (s, 3H), 2.77–2.69 (m, 2H), 2.60–2.52 (m, 1H), 2.41–2.30 (m, 2H), 1.28 (s, 3H), 0.62 (s, 3H) ppm.  $^{13}\text{C NMR}$  (150 MHz,  $\text{CDCl}_3$ )  $\delta$  219.8, 159.6, 140.6, 129.2, 119.9, 114.4, 112.2, 87.4, 73.5, 55.4, 54.3, 51.8, 34.7, 29.8, 20.4, 20.0 ppm. **IR** (KBr):  $\nu_{\text{max}}$  = 3284, 2966, 2923, 1738, 1281, 692  $\text{cm}^{-1}$ . **HRMS** (ESI) ( $m/z$ ): Calcd for  $\text{C}_{16}\text{H}_{18}\text{O}_2$ ,  $[\text{M}+\text{Na}]^+$ , 265.1199; found: 265.1204.  $[\alpha]_D^{25}$ :  $-166.7$  ( $c$  0.15,  $\text{CHCl}_3$ ). **HPLC** (Chiral pak AS-H, *i*-PrOH/*n*-hexane = 10 : 90, flow rate = 1.0 mL/min, wave length = 210 nm):  $t_R$  = 7.476 min (minor),  $t_R$  = 13.638 min (major) (95% *ee*).

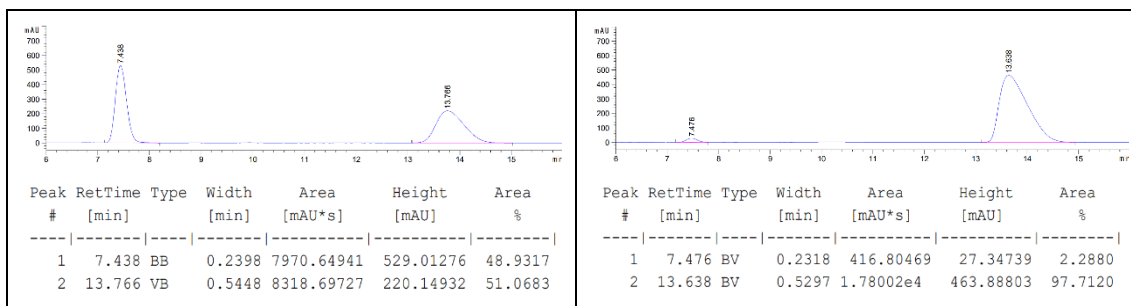

### (S)-3-ethynyl-3-(3-fluorophenyl)-2,2-dimethylcyclopentan-1-one (**2l**)

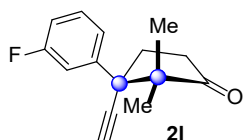

Purification by flash column chromatography on silica gel (petroleum ether/EtOAc = 10 : 1,  $R_f$  = 0.38) afforded **2l** (20.5 mg, 89%) as a white solid.  $^1\text{H NMR}$  (400 MHz,  $\text{CDCl}_3$ )  $\delta$  7.34 (td,  $J$  = 7.9, 6.0 Hz, 1H), 7.30–7.21 (m, 2H), 7.04–6.98 (m, 1H), 2.79–2.66 (m, 2H), 2.65–2.52 (m, 1H), 2.43–2.32 (m, 2H), 1.26 (s, 3H), 0.62 (s, 3H) ppm.  $^{13}\text{C}$

**NMR** (100 MHz, CDCl<sub>3</sub>)  $\delta$  219.3, 162.8 (d,  $J = 245.6$  Hz), 141.6 (d,  $J_{CF} = 7.0$  Hz), 129.7 (d,  $J_{CF} = 8.3$  Hz), 123.2 (d,  $J_{CF} = 2.6$  Hz), 114.9 (d,  $J_{CF} = 22.8$  Hz), 114.5 (d,  $J_{CF} = 21.0$  Hz), 86.8, 74.0, 54.3, 51.7, 34.6, 29.8, 20.4, 19.9 ppm. **<sup>19</sup>F NMR** (564 MHz, CDCl<sub>3</sub>)  $\delta$  -112.81 (s, 1F) ppm. **IR** (KBr):  $\nu_{max} = 3290, 2969, 2921, 1740, 1625, 1263, 1081, 624$  cm<sup>-1</sup>. **HRMS** (APCI) (m/z): Calcd for C<sub>15</sub>H<sub>15</sub>FO, [M+H]<sup>+</sup>, 231.1180; found: 231.1172.  $[\alpha]_D^{25}$ : -116.7 (*c* 0.15, CHCl<sub>3</sub>). **m.p.**: 53.2–54.9 °C. **HPLC** (Chiral pak AS-H, *i*-PrOH/*n*-hexane = 10 : 90, flow rate = 1.0 mL/min, wave length = 210 nm):  $t_R = 6.387$  min (minor),  $t_R = 10.169$  min (major) (98% *ee*).

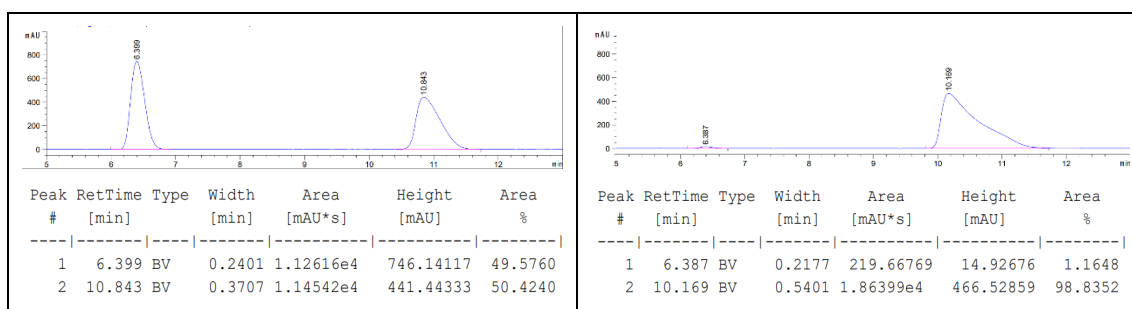

### (S)-3-(3-chlorophenyl)-3-ethynyl-2,2-dimethylcyclopentan-1-one (**2m**)

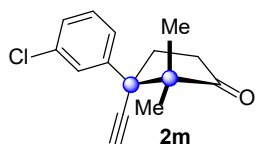

Purification by flash column chromatography on silica gel (petroleum ether/EtOAc = 10 : 1,  $R_f = 0.5$ ) afforded **2m** (24.2 mg, 98%) as a white solid. **<sup>1</sup>H NMR** (600 MHz, CDCl<sub>3</sub>)  $\delta$  7.50 (s, 1H), 7.39 (d,  $J = 5.9$  Hz, 1H), 7.30 (d,  $J = 7.6$  Hz, 2H), 2.77–2.68 (m, 2H), 2.62–2.54 (m, 1H), 2.44–2.32 (m, 2H), 1.26 (s, 3H), 0.62 (s, 3H) ppm. **<sup>13</sup>C NMR** (150 MHz, CDCl<sub>3</sub>)  $\delta$  219.1, 141.1, 134.4, 129.5, 127.9, 127.8, 125.8, 86.7, 74.1, 54.3, 51.7, 34.5, 29.7, 20.4, 19.9 ppm. **IR** (KBr):  $\nu_{max} = 3295, 2971, 2926, 1742, 1264, 1085, 619$  cm<sup>-1</sup>. **HRMS** (ESI) (m/z): Calcd for C<sub>15</sub>H<sub>15</sub>ClO, [M-H]<sup>-</sup>, 245.0739; found: 245.0735.  $[\alpha]_D^{25}$ : -139.0 (*c* 0.62, CHCl<sub>3</sub>). **m.p.**: 78.6–80.1 °C. **HPLC** (Chiral pak AS-H, *i*-PrOH/*n*-hexane = 10 : 90, flow rate = 1.0 mL/min, wave length = 210 nm):  $t_R = 6.348$  min (minor),  $t_R = 11.719$  min (major) (98% *ee*).

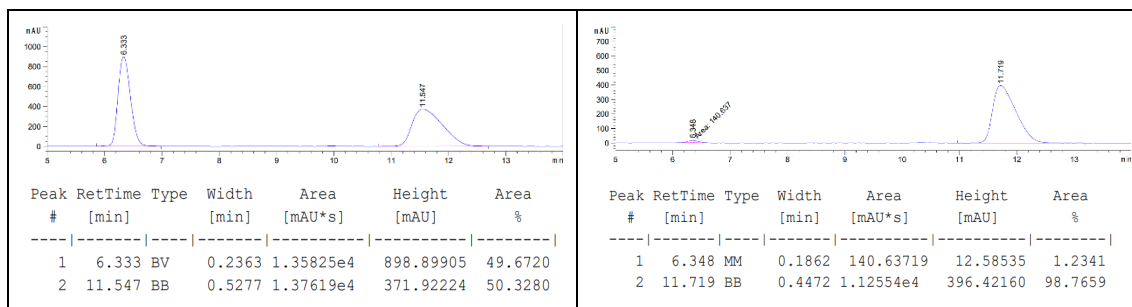

### (S)-3-(3-bromophenyl)-3-ethynyl-2,2-dimethylcyclopentan-1-one (**2n**)

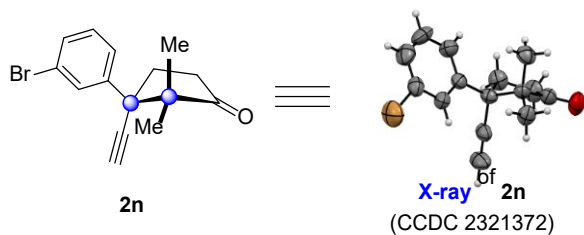

Purification by flash column chromatography on silica gel (petroleum ether/EtOAc = 10 : 1,  $R_f$  = 0.28) afforded **2n** (25 mg, 86%) as a white solid. The colorless crystal of **2n** for X-ray crystallographic analysis was obtained by slow diffusion of *n*-hexane to a solution of **2n** in EtOAc.  $^1\text{H NMR}$  (600 MHz,  $\text{CDCl}_3$ )  $\delta$  7.65 (s, 1H), 7.44 (t,  $J$  = 7.8 Hz, 2H), 7.25 (t,  $J$  = 7.8 Hz, 1H), 2.77–2.67 (m, 2H), 2.63–2.53 (m, 1H), 2.42 (s, 1H), 2.39–2.33 (m, 1H), 1.26 (s, 3H), 0.62 (s, 3H) ppm.  $^{13}\text{C NMR}$  (150 MHz,  $\text{CDCl}_3$ )  $\delta$  219.1, 141.4, 130.8, 130.7, 129.8, 126.3, 122.7, 86.7, 74.1, 54.3, 51.7, 34.5, 29.7, 20.4, 19.9 ppm. **IR** (KBr):  $\nu_{\text{max}}$  = 3292, 2974, 2929, 1742, 1469, 1082, 648  $\text{cm}^{-1}$ . **HRMS** (APCI) ( $m/z$ ): Calcd for  $\text{C}_{15}\text{H}_{15}\text{BrO}$ ,  $[\text{M}+\text{H}]^+$ , 291.0379; found: 291.0374.  $[\alpha]_{\text{D}}^{25}$ :  $-134.0$  ( $c$  0.2,  $\text{CHCl}_3$ ). **m.p.**: 105.3–107.1  $^{\circ}\text{C}$ . **HPLC** (Chiral pak AS-H, *i*-PrOH/*n*-hexane = 10 : 90, flow rate = 1.0 mL/min, wave length = 210 nm):  $t_{\text{R}}$  = 6.666 min (minor),  $t_{\text{R}}$  = 13.021 min (major) (95% *ee*).

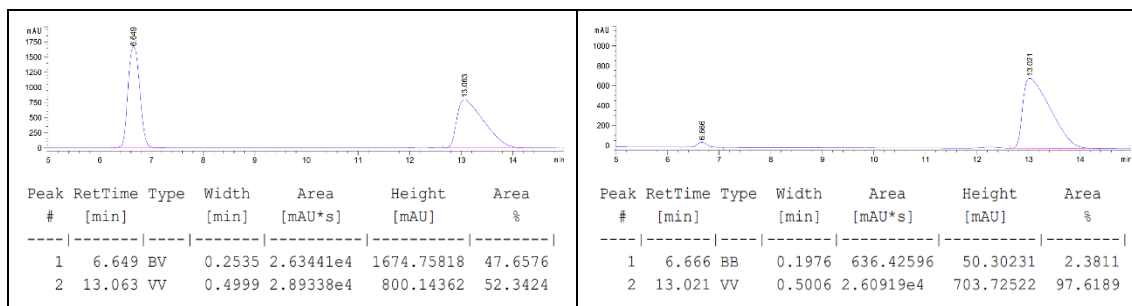

### (*S*)-3-ethynyl-2,2-dimethyl-3-(*m*-tolyl)cyclopentan-1-one (**2o**)

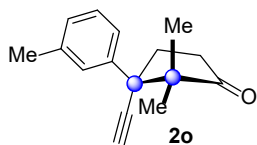

Purification by flash column chromatography on silica gel (petroleum ether/EtOAc = 10 : 1,  $R_f$  = 0.46) afforded **2o** (22 mg, 97%) as a white solid.  $^1\text{H NMR}$  (600 MHz,  $\text{CDCl}_3$ )  $\delta$  7.32 (s, 1H), 7.30 (d,  $J$  = 7.9 Hz, 1H), 7.26 (t,  $J$  = 7.5 Hz, 1H), 7.12 (d,  $J$  = 7.2 Hz, 1H), 2.79–2.70 (m, 2H), 2.61–2.53 (m, 1H), 2.44–2.29 (m, 5H), 1.27 (s, 3H), 0.61 (s, 3H) ppm.  $^{13}\text{C NMR}$  (150 MHz,  $\text{CDCl}_3$ )  $\delta$  220.0, 138.8, 137.9, 128.3, 128.3, 128.2, 124.6, 87.6, 73.4, 54.3, 51.8, 34.7, 29.7, 21.8, 20.4, 20.0 ppm. **IR** (KBr):  $\nu_{\text{max}}$  = 3291, 2970, 2924, 1740, 1461, 1268, 1082, 643  $\text{cm}^{-1}$ . **HRMS** (ESI) ( $m/z$ ): Calcd for  $\text{C}_{16}\text{H}_{18}\text{O}$ ,  $[\text{M}+\text{Na}]^+$ , 249.1250; found: 249.1246.  $[\alpha]_{\text{D}}^{25}$ :  $-142.1$  ( $c$  0.19,  $\text{CHCl}_3$ ). **m.p.**: 43.1–44.7  $^{\circ}\text{C}$ . **HPLC** (Chiral pak AS-H, *i*-PrOH/*n*-hexane = 10 : 90, flow rate = 1.0 mL/min, wave length = 210 nm):  $t_{\text{R}}$  = 5.212 min (minor),  $t_{\text{R}}$  = 8.664 min (major) (98% *ee*).

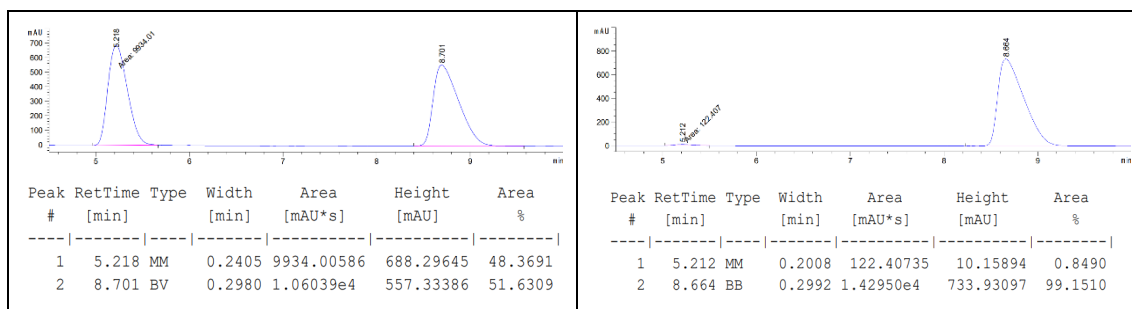

### (R)-3-ethynyl-3-(2-fluorophenyl)-2,2-dimethylcyclopentan-1-one (2p)

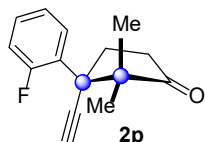

Purification by flash column chromatography on silica gel (petroleum ether/EtOAc = 10 : 1,  $R_f$  = 0.26) afforded **2p** (22.5 mg, 98%) as a white solid.  $^1\text{H NMR}$  (400 MHz,  $\text{CDCl}_3$ )  $\delta$  7.59 (td,  $J$  = 8.0, 1.8 Hz, 1H), 7.34–7.27 (m, 1H), 7.16 (td,  $J$  = 7.6, 1.5 Hz, 1H), 7.11–7.02 (m, 1H), 3.09–2.98 (m, 1H), 2.81–2.69 (m, 1H), 2.60–2.50 (m, 1H), 2.48–2.41 (m, 1H), 2.41 (s, 1H), 1.30 (d,  $J$  = 1.8 Hz, 3H), 0.73 (s, 3H) ppm.  $^{13}\text{C NMR}$  (100 MHz,  $\text{CDCl}_3$ )  $\delta$  219.7, 161.3 (d,  $J_{\text{CF}}$  = 249.0 Hz), 130.6 (d,  $J_{\text{CF}}$  = 4.3 Hz), 129.6 (d,  $J_{\text{CF}}$  = 8.9 Hz), 125.8 (d,  $J_{\text{CF}}$  = 11.0 Hz), 124.1 (d,  $J_{\text{CF}}$  = 3.2 Hz), 116.9 (d,  $J_{\text{CF}}$  = 24.7 Hz), 86.5, 73.4, 54.9, 50.8, 34.8, 30.40 (d,  $J_{\text{CF}}$  = 6.3 Hz), 20.8 (d,  $J_{\text{CF}}$  = 4.2 Hz), 20.4 ppm.  $^{19}\text{F NMR}$  (564 MHz,  $\text{CDCl}_3$ )  $\delta$  -106.68 (s, 1F) ppm. **IR** (KBr):  $\nu_{\text{max}}$  = 3249, 2967, 2924, 1739, 1273, 1081, 756  $\text{cm}^{-1}$ . **HRMS** (APCI) ( $m/z$ ): Calcd for  $\text{C}_{15}\text{H}_{15}\text{FO}$ ,  $[\text{M}+\text{H}]^+$ , 231.1180; found: 231.1171.  $[\alpha]_{\text{D}}^{25}$ : -146.3 ( $c$  0.1,  $\text{CHCl}_3$ ). **m.p.**: 92.8–94.1 °C. **HPLC** (Chiral pak AS-H,  $i$ -PrOH/ $n$ -hexane = 10 : 90, flow rate = 1.0 mL/min, wave length = 210 nm):  $t_{\text{R}}$  = 6.120 min (minor),  $t_{\text{R}}$  = 8.015 min (major) (92% *ee*).

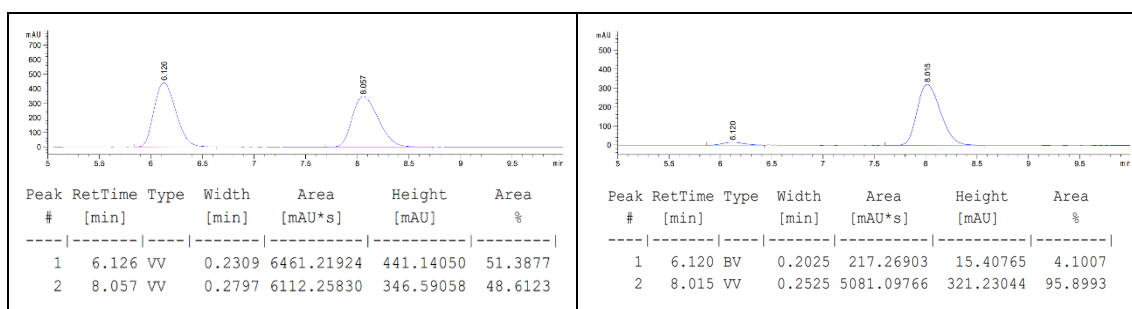

### (S)-3-(4-chloro-3-methoxyphenyl)-3-ethynyl-2,2-dimethylcyclopentan-1-one (2q)

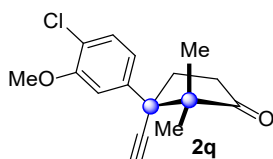

Purification by flash column chromatography on silica gel (petroleum ether/EtOAc = 10 : 1,  $R_f$  = 0.23) afforded **2q**

(22.1 mg, 80%) as a white solid.  $^1\text{H NMR}$  (400 MHz,  $\text{CDCl}_3$ )  $\delta$  7.35 (d,  $J = 8.3$  Hz, 1H), 7.15–7.09 (m, 1H), 6.99 (dd,  $J = 8.3, 1.8$  Hz, 1H), 3.93 (s, 3H), 2.79–2.64 (m, 2H), 2.62–2.51 (m, 1H), 2.45–2.31 (m, 2H), 1.27 (s, 3H), 0.63 (s, 3H) ppm.  $^{13}\text{C NMR}$  (100 MHz,  $\text{CDCl}_3$ )  $\delta$  219.2, 154.8, 139.1, 129.8, 121.9, 120.1, 112.1, 86.9, 74.0, 56.3, 54.3, 51.8, 34.6, 29.9, 20.4, 20.0 ppm. **IR** (KBr):  $\nu_{\text{max}} = 3292, 2970, 2928, 1742, 1580, 1260, 1067, 701$   $\text{cm}^{-1}$ . **HRMS** (APCI) (m/z): Calcd for  $\text{C}_{16}\text{H}_{17}\text{ClO}_2$ ,  $[\text{M}+\text{H}]^+$ , 277.0990; found: 277.0991.  $[\alpha]_{\text{D}}^{25}$ :  $-110$  ( $c$  0.18,  $\text{CHCl}_3$ ). **m.p.**: 150.3–152.0  $^{\circ}\text{C}$ . **HPLC** (Chiral pak AS-H,  $i$ -PrOH/ $n$ -hexane = 10 : 90, flow rate = 1.0 mL/min, wave length = 210 nm):  $t_{\text{R}} = 8.523$  min (minor),  $t_{\text{R}} = 23.474$  min (major) (94% *ee*).

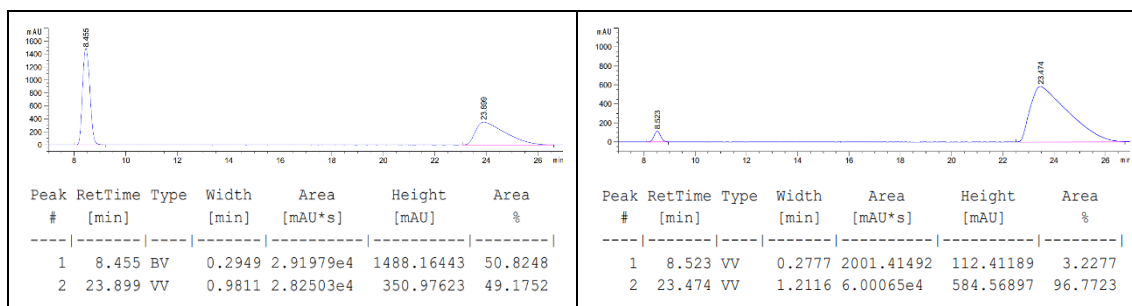

### (S)-3-(3,4-dichlorophenyl)-3-ethynyl-2,2-dimethylcyclopentan-1-one (2r)

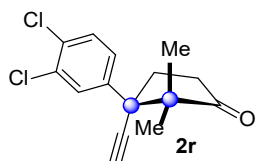

Purification by flash column chromatography on silica gel (petroleum ether/EtOAc = 3 : 1,  $R_{\text{f}} = 0.37$ ) afforded **2r** (20 mg, 71%) as a white solid.  $^1\text{H NMR}$  (400 MHz,  $\text{CDCl}_3$ )  $\delta$  7.60 (d,  $J = 1.9$  Hz, 1H), 7.45 (d,  $J = 8.5$  Hz, 1H), 7.34 (dd,  $J = 8.4, 2.0$  Hz, 1H), 2.79–2.52 (m, 3H), 2.43 (s, 1H), 2.41–2.31 (m, 1H), 1.25 (s, 3H), 0.63 (s, 3H) ppm.  $^{13}\text{C NMR}$  (100 MHz,  $\text{CDCl}_3$ )  $\delta$  218.7, 139.3, 132.6, 131.8, 130.2, 129.7, 127.0, 86.3, 74.4, 54.3, 51.4, 34.5, 29.8, 20.4, 19.8 ppm. **IR** (KBr):  $\nu_{\text{max}} = 3297, 2970, 2925, 1740, 1468, 1082, 669$   $\text{cm}^{-1}$ . **HRMS** (APCI) (m/z): Calcd for  $\text{C}_{15}\text{H}_{14}\text{Cl}_2\text{O}$ ,  $[\text{M}+\text{H}]^+$ , 281.0495; found: 281.0488.  $[\alpha]_{\text{D}}^{25}$ :  $-77.1$  ( $c$  0.2,  $\text{CHCl}_3$ ). **m.p.**: 118.0–120.3  $^{\circ}\text{C}$ . **HPLC** (Chiral pak AS-H,  $i$ -PrOH/ $n$ -hexane = 10 : 90, flow rate = 1.0 mL/min, wave length = 210 nm):  $t_{\text{R}} = 6.572$  min (minor),  $t_{\text{R}} = 19.309$  min (major) (94% *ee*).

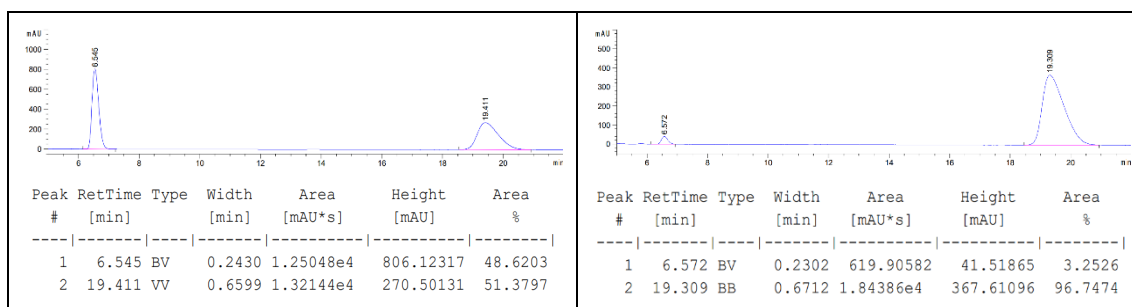

### (S)-3-(4-bromo-3-methylphenyl)-3-ethynyl-2,2-dimethylcyclopentan-1-one (2s)

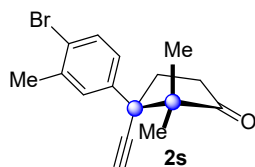

Purification by flash column chromatography on silica gel (petroleum ether/EtOAc = 10 : 1,  $R_f$  = 0.42) afforded **2s** (25.0 mg, 82%) as a white solid.  $^1\text{H NMR}$  (600 MHz,  $\text{CDCl}_3$ )  $\delta$  7.52 (d,  $J$  = 8.4 Hz, 1H), 7.39–7.34 (m, 1H), 7.17 (dd,  $J$  = 8.3, 1.9 Hz, 1H), 2.76–2.67 (m, 2H), 2.60–2.53 (m, 1H), 2.43 (s, 3H), 2.39 (s, 1H), 2.38–2.31 (m, 1H), 1.25 (s, 3H), 0.61 (s, 3H) ppm.  $^{13}\text{C NMR}$  (150 MHz,  $\text{CDCl}_3$ )  $\delta$  219.4, 138.2, 137.8, 132.2, 130.1, 126.6, 124.1, 87.0, 73.8, 54.2, 51.5, 34.6, 29.8, 23.3, 20.4, 19.9 ppm. **IR** (KBr):  $\nu_{\text{max}}$  = 3295, 2974, 2925, 1741, 1628, 1474, 1028, 820  $\text{cm}^{-1}$ . **HRMS** (APCI) (m/z): Calcd for  $\text{C}_{16}\text{H}_{17}\text{BrO}$ ,  $[\text{M}+\text{H}]^+$ , 305.0536; found: 305.0533.  $[\alpha]_{\text{D}}^{25}$ :  $-103.9$  ( $c$  0.24,  $\text{CHCl}_3$ ). **m.p.**: 150.1–151.0  $^\circ\text{C}$ . **HPLC** (Chiral pak AS-H, *i*-PrOH/*n*-hexane = 10 : 90, flow rate = 1.0 mL/min, wave length = 210 nm):  $t_{\text{R}}$  = 6.110 min (minor),  $t_{\text{R}}$  = 21.304 min (major) (95% *ee*).

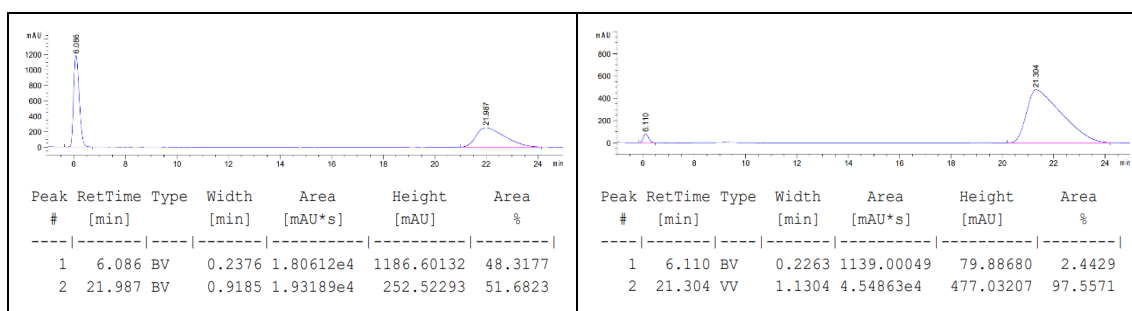

### (S)-3-(benzo[d][1,3]dioxol-5-yl)-3-ethynyl-2,2-dimethylcyclopentan-1-one (2t)

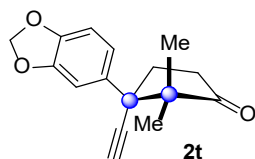

Purification by flash column chromatography on silica gel (petroleum ether/EtOAc = 10 : 1,  $R_f$  = 0.59) afforded **2t** (19.2 mg, 75%) as a white solid.  $^1\text{H NMR}$  (400 MHz,  $\text{CDCl}_3$ )  $\delta$  7.03 (s, 1H), 6.96 (d,  $J$  = 8.2 Hz, 1H), 6.81 (d,  $J$  = 8.2 Hz, 1H), 5.98 (s, 2H), 2.77–2.62 (m, 2H), 2.60–2.49 (m, 1H), 2.41–2.27 (m, 2H), 1.25 (s, 3H), 0.62 (s, 3H) ppm.  $^{13}\text{C NMR}$  (100 MHz,  $\text{CDCl}_3$ )  $\delta$  219.8, 147.8, 147.0, 132.8, 120.7, 108.5, 107.9, 101.3, 87.5, 73.5, 54.3, 51.6, 34.7, 30.0, 20.4, 19.9 ppm. **IR** (KBr):  $\nu_{\text{max}}$  = 3290, 2972, 2923, 1740, 1497, 1247, 1087, 811  $\text{cm}^{-1}$ . **HRMS** (APCI) (m/z): Calcd for  $\text{C}_{16}\text{H}_{16}\text{O}_3$ ,  $[\text{M}+\text{H}]^+$ , 257.1172; found: 257.1163.  $[\alpha]_{\text{D}}^{25}$ :  $-199.3$  ( $c$  0.11,  $\text{CHCl}_3$ ). **m.p.**: 91.0–93.0  $^\circ\text{C}$ . **HPLC** (Chiral pak AS-H, *i*-PrOH/*n*-hexane = 10 : 90, flow rate = 1.0 mL/min, wave length = 210 nm):  $t_{\text{R}}$  = 10.836 min (minor),  $t_{\text{R}}$  = 21.600 min (major) (94% *ee*).

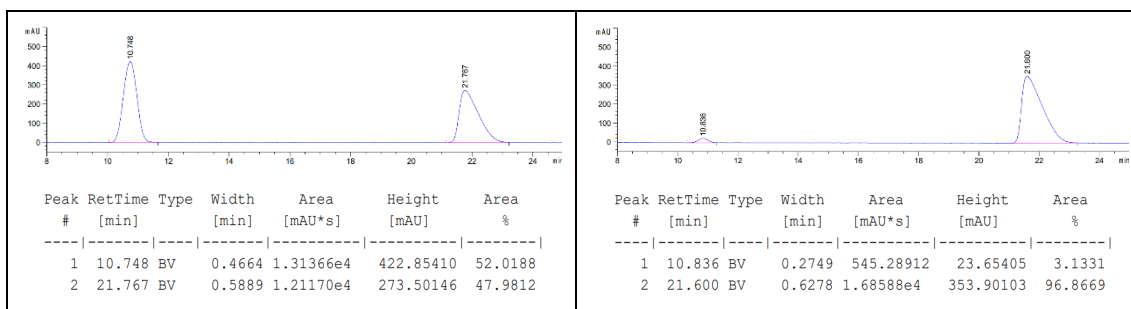

### (S)-3-(3,5-di-*tert*-butylphenyl)-3-ethynyl-2,2-dimethylcyclopentan-1-one (**2u**)

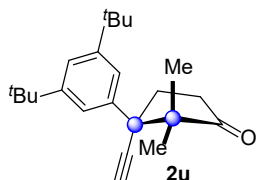

Purification by flash column chromatography on silica gel (petroleum ether/EtOAc = 10 : 1,  $R_f$  = 0.53) afforded **2u** (26 mg, 80%) as a white solid.  $^1\text{H NMR}$  (400 MHz,  $\text{CDCl}_3$ )  $\delta$  7.35 (s, 3H), 2.85–2.69 (m, 2H), 2.63–2.52 (m, 1H), 2.41–2.33 (m, 2H), 1.34 (s, 18H), 1.25 (s, 3H), 0.59 (s, 3H) ppm.  $^{13}\text{C NMR}$  (100 MHz,  $\text{CDCl}_3$ )  $\delta$  220.3, 150.4, 137.5, 121.9, 121.3, 87.8, 73.4, 54.3, 52.3, 35.1, 34.8, 31.6, 29.7, 20.4, 19.8 ppm. **IR** (KBr):  $\nu_{\text{max}}$  = 3298, 2956, 2928, 1735, 1597, 1252, 737  $\text{cm}^{-1}$ . **HRMS** (ESI) ( $m/z$ ): Calcd for  $\text{C}_{23}\text{H}_{32}\text{O}$ ,  $[\text{M}+\text{Na}]^+$ , 347.2345; found: 347.2343.  $[\alpha]_D^{25}$ :  $-51.2$  ( $c$  0.26,  $\text{CHCl}_3$ ). **m.p.**: 135.3–137.6  $^\circ\text{C}$ . **HPLC** (Chiral pak AS-H, *i*-PrOH/*n*-hexane = 10 : 90, flow rate = 1.0 mL/min, wave length = 210 nm):  $t_R$  = 8.850 min (minor),  $t_R$  = 11.694 min (major) (82% *ee*).

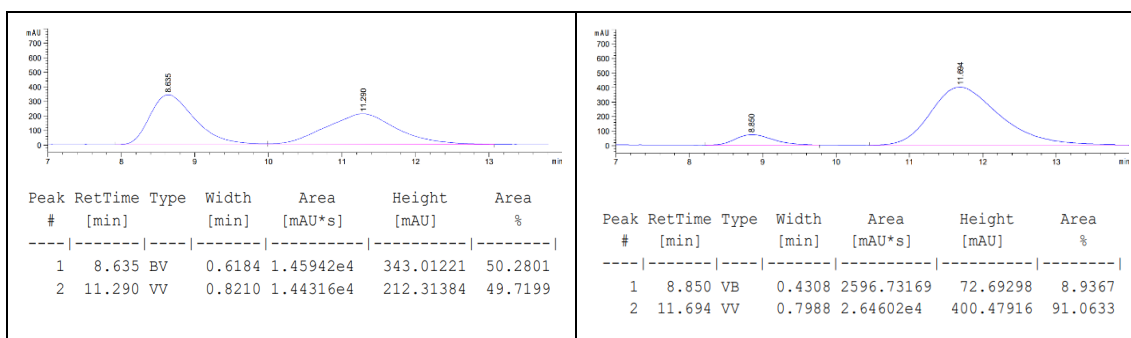

### (S)-3-ethynyl-2,2-dimethyl-3-(3,4,5-trimethoxyphenyl)cyclopentan-1-one (**2v**)

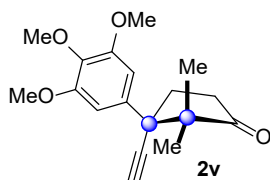

Purification by flash column chromatography on silica gel (petroleum ether/EtOAc = 3 : 1,  $R_f$  = 0.37) afforded **2v** (23.4 mg, 74%) as a white solid.  $^1\text{H NMR}$  (400 MHz,  $\text{CDCl}_3$ )  $\delta$  6.72 (s, 2H), 3.88 (s, 6H), 3.85 (s, 3H), 2.79–2.63 (m, 2H), 2.61–2.51 (m, 1H), 2.43–2.32 (m, 2H), 1.29 (s, 3H), 0.64 (s, 3H) ppm.  $^{13}\text{C NMR}$  (100 MHz,  $\text{CDCl}_3$ )  $\delta$



219.7, 152.9, 137.6, 134.5, 105.1, 87.3, 73.7, 61.0, 56.4, 54.4, 52.0, 34.7, 29.9, 20.4, 20.0 ppm. **IR** (KBr):  $\nu_{\max}$  = 3279, 2975, 2932, 1739, 1409, 1126, 637  $\text{cm}^{-1}$ . **HRMS** (APCI) ( $m/z$ ): Calcd for  $\text{C}_{18}\text{H}_{22}\text{O}_4$ ,  $[\text{M}+\text{H}]^+$ , 303.1591; found: 303.1580.  $[\alpha]_{\text{D}}^{25}$ :  $-97.2$  ( $c$  0.18,  $\text{CHCl}_3$ ). **m.p.**: 129.1–130.1  $^{\circ}\text{C}$ . **HPLC** (Chiral pak AS-H, *i*-PrOH/*n*-hexane = 15 : 85, flow rate = 1.0 mL/min, wave length = 210 nm):  $t_{\text{R}}$  = 8.779 min (minor),  $t_{\text{R}}$  = 13.413 min (major) (91% *ee*).

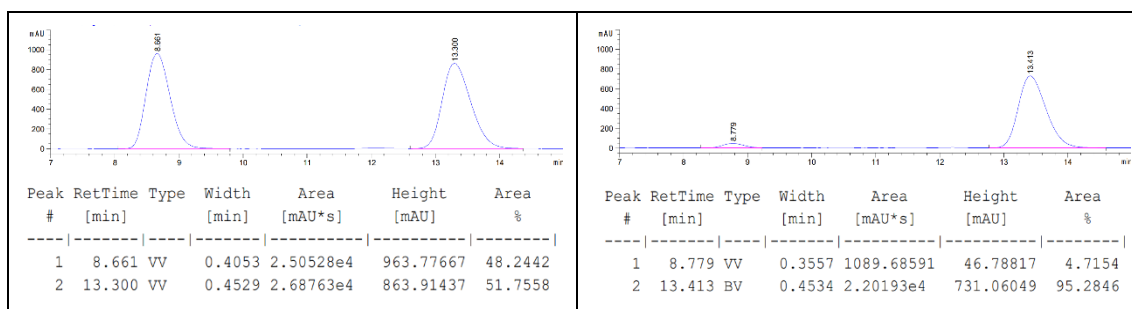

### (*S*)-3-ethynyl-2,2-dimethyl-3-(naphthalen-2-yl)cyclopentan-1-one (**2w**)

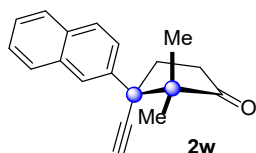

Purification by flash column chromatography on silica gel (petroleum ether/EtOAc = 10 : 1,  $R_f$  = 0.38) afforded **2w** (24.1 mg, 92%) as a white solid.  **$^1\text{H}$  NMR** (600 MHz,  $\text{CDCl}_3$ )  $\delta$  7.93 (s, 1H), 7.86 (d,  $J$  = 8.5 Hz, 3H), 7.68 (dd,  $J$  = 8.6, 1.9 Hz, 1H), 7.53–7.48 (m, 2H), 2.94–2.89 (m, 1H), 2.84–2.77 (m, 1H), 2.64 (dd,  $J$  = 18.9, 8.4 Hz, 1H), 2.51–2.45 (m, 1H), 2.45 (s, 1H), 1.36 (s, 3H), 0.65 (s, 3H) ppm.  **$^{13}\text{C}$  NMR** (150 MHz,  $\text{CDCl}_3$ )  $\delta$  219.8, 136.5, 133.2, 132.7, 128.3, 127.9, 127.6, 126.4, 126.3, 126.2, 126.0, 87.4, 73.8, 54.5, 52.0, 34.7, 29.8, 20.5, 20.2 ppm. **IR** (KBr):  $\nu_{\max}$  = 3295, 2971, 2950, 1739, 1382, 1085, 820, 476  $\text{cm}^{-1}$ . **HRMS** (APCI) ( $m/z$ ): Calcd for  $\text{C}_{19}\text{H}_{18}\text{O}$ ,  $[\text{M}+\text{H}]^+$ , 263.1430; found: 263.1420.  $[\alpha]_{\text{D}}^{25}$ :  $-126.1$  ( $c$  0.72,  $\text{CHCl}_3$ ). **m.p.**: 122.0–123.8  $^{\circ}\text{C}$ . **HPLC** (Chiral pak AS-H, *i*-PrOH/*n*-hexane = 10 : 90, flow rate = 1.0 mL/min, wave length = 210 nm):  $t_{\text{R}}$  = 7.492 min (minor),  $t_{\text{R}}$  = 25.150 min (major) (95% *ee*).

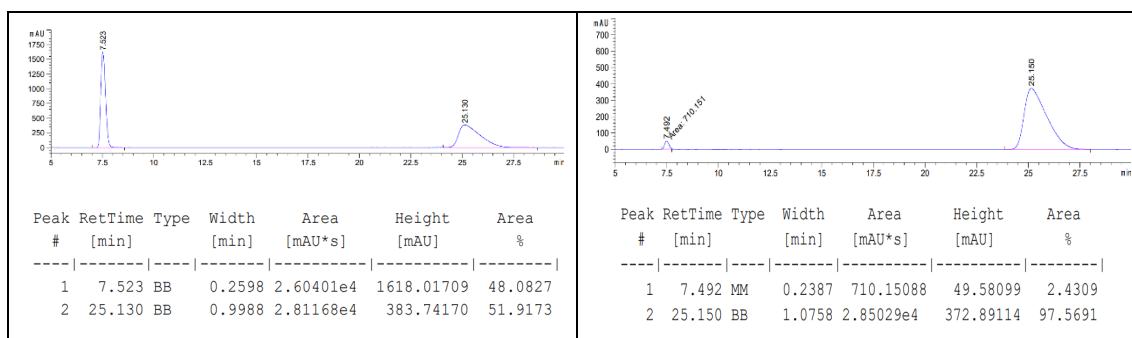

**(S)-3-(2,3-dihydrobenzofuran-5-yl)-3-ethynyl-2,2-dimethylcyclopentan-1-one (2x)**

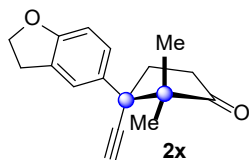

Purification by flash column chromatography on silica gel (petroleum ether/EtOAc = 10 : 1,  $R_f$  = 0.38) afforded **2x** (18.3 mg, 72%) as a white solid.  $^1\text{H NMR}$  (400 MHz,  $\text{CDCl}_3$ )  $\delta$  7.35 (s, 1H), 7.23 (d,  $J$  = 8.3 Hz, 1H), 6.77 (d,  $J$  = 8.4 Hz, 1H), 4.59 (t,  $J$  = 8.7 Hz, 2H), 3.24 (t,  $J$  = 8.6 Hz, 2H), 2.77–2.66 (m, 2H), 2.62–2.50 (m, 1H), 2.41–2.25 (m, 2H), 1.25 (s, 3H), 0.62 (s, 3H) ppm.  $^{13}\text{C NMR}$  (100 MHz,  $\text{CDCl}_3$ )  $\delta$  220.2, 159.6, 130.8, 127.2, 127.2, 124.3, 108.8, 87.9, 73.3, 71.6, 54.3, 51.4, 34.7, 30.1, 30.0, 20.4, 19.9 ppm. **IR** (KBr):  $\nu_{\text{max}}$  = 3284, 2971, 2925, 1740, 1494, 1235, 1084, 820  $\text{cm}^{-1}$ . **HRMS** (ESI) ( $m/z$ ): Calcd for  $\text{C}_{17}\text{H}_{18}\text{O}_2$ ,  $[\text{M}+\text{Na}]^+$ , 277.1199; found: 277.1194.  $[\alpha]_{\text{D}}^{25}$ :  $-54$  ( $c$  0.15,  $\text{CHCl}_3$ ). **m.p.**: 85.2–86.4  $^\circ\text{C}$ . **HPLC** (Chiral pak AS-H,  $i$ -PrOH/ $n$ -hexane = 10 : 90, flow rate = 1.0 mL/min, wave length = 210 nm):  $t_{\text{R}}$  = 8.625 min (minor),  $t_{\text{R}}$  = 23.158 min (major) (96% *ee*).

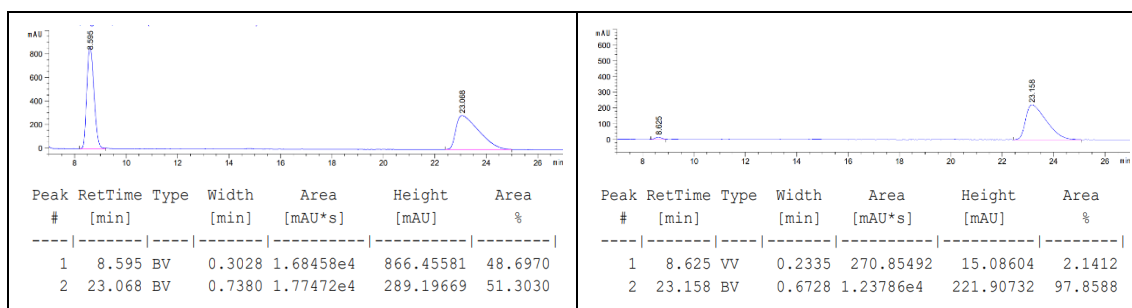

**(S)-3-ethynyl-3-(furan-3-yl)-2,2-dimethylcyclopentan-1-one (2y)**

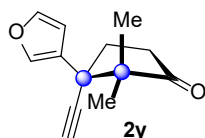

Purification by flash column chromatography on silica gel (petroleum ether/EtOAc = 10 : 1,  $R_f$  = 0.42) afforded **2y** (13.7 mg, 68%) as a colorless oil.  $^1\text{H NMR}$  (400 MHz,  $\text{CDCl}_3$ )  $\delta$  7.42 (dt,  $J$  = 7.2, 1.5 Hz, 2H), 6.38 (s, 1H), 2.69–2.58 (m, 1H), 2.54–2.37 (m, 3H), 2.34 (s, 1H), 1.23 (s, 3H), 0.77 (s, 3H) ppm.  $^{13}\text{C NMR}$  (100 MHz,  $\text{CDCl}_3$ )  $\delta$  219.8, 143.4, 140.1, 125.3, 110.1, 86.1, 72.8, 53.6, 45.4, 34.3, 31.4, 20.3, 20.0 ppm. **IR** (KBr):  $\nu_{\text{max}}$  = 3300, 2975, 2923, 1740, 1629, 1084, 671  $\text{cm}^{-1}$ . **HRMS** (APCI) ( $m/z$ ): Calcd for  $\text{C}_{13}\text{H}_{14}\text{O}_2$ ,  $[\text{M}+\text{H}]^+$ , 203.1067; found: 2103.1061.  $[\alpha]_{\text{D}}^{25}$ :  $-76.7$  ( $c$  0.09,  $\text{CHCl}_3$ ). **HPLC** (Chiral pak AS-H,  $i$ -PrOH/ $n$ -hexane = 10 : 90, flow rate = 1.0 mL/min, wave length = 210 nm):  $t_{\text{R}}$  = 7.014 min (minor),  $t_{\text{R}}$  = 9.817 min (major) (85% *ee*).

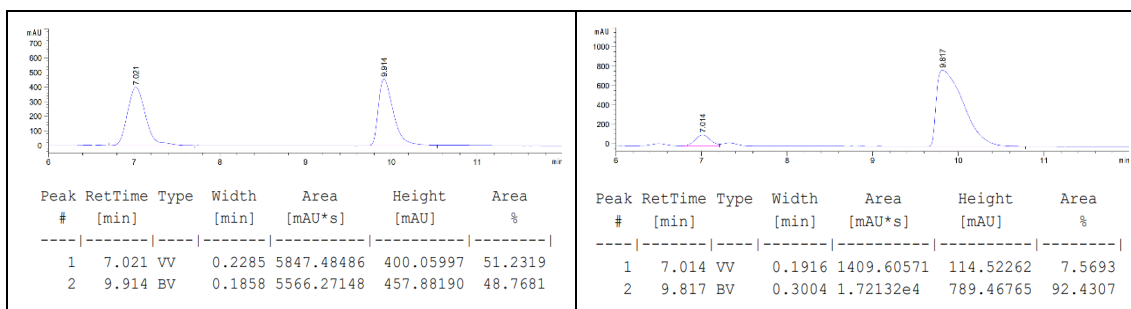

### (*R*)-3-ethynyl-2,2-dimethyl-3-(thiophen-3-yl)cyclopentan-1-one (**2z**)

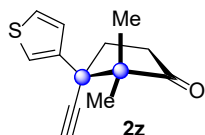

Purification by flash column chromatography on silica gel (petroleum ether/EtOAc = 10 : 1,  $R_f$  = 0.42) afforded **2z** (21.4 mg, 98%) as a white solid.  $^1\text{H NMR}$  (400 MHz,  $\text{CDCl}_3$ )  $\delta$  7.33 (dd,  $J$  = 5.0, 3.0 Hz, 1H), 7.23 (dd,  $J$  = 2.8, 1.2 Hz, 1H), 7.14 (dd,  $J$  = 5.0, 1.2 Hz, 1H), 2.72–2.50 (m, 3H), 2.50–2.42 (m, 1H), 2.39 (s, 1H), 1.27 (s, 3H), 0.68 (s, 3H) ppm.  $^{13}\text{C NMR}$  (100 MHz,  $\text{CDCl}_3$ )  $\delta$  219.8, 140.7, 127.3, 125.8, 121.9, 86.8, 73.3, 54.1, 49.1, 34.5, 31.3, 20.4, 20.0 ppm. IR (KBr):  $\nu_{\text{max}}$  = 3292, 2971, 2925, 1740, 1264, 1082, 791  $\text{cm}^{-1}$ . HRMS (APCI) ( $m/z$ ): Calcd for  $\text{C}_{13}\text{H}_{14}\text{OS}$ ,  $[\text{M}+\text{H}]^+$ , 219.0838; found: 219.0832.  $[\alpha]_{\text{D}}^{25}$ :  $-129.7$  ( $c$  0.18,  $\text{CHCl}_3$ ). **m.p.**: 51.2–53.0 °C. HPLC (Chiral pak AS-H, *i*-PrOH/*n*-hexane = 10 : 90, flow rate = 1.0 mL/min, wave length = 210 nm):  $t_{\text{R}}$  = 6.959 min (minor),  $t_{\text{R}}$  = 10.816 min (major) (96% *ee*).

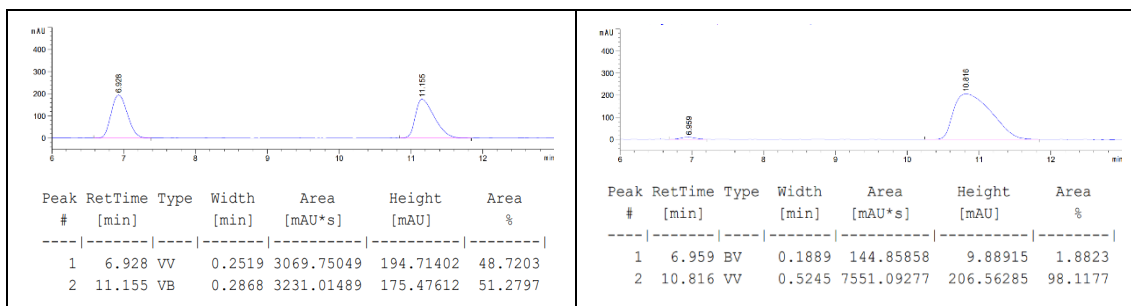

### (*R*)-3-ethynyl-2,2-dimethyl-3-(thiophen-2-yl)cyclopentan-1-one (**2aa**)

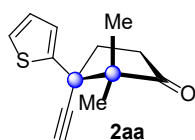

Purification by flash column chromatography on silica gel (petroleum ether/EtOAc = 10 : 1,  $R_f$  = 0.45) afforded **2aa** (20.1 mg, 92%) as a white solid.  $^1\text{H NMR}$  (600 MHz,  $\text{CDCl}_3$ )  $\delta$  7.25 (d,  $J$  = 5.2 Hz, 1H), 7.06 (d,  $J$  = 2.6 Hz, 1H), 7.03–6.98 (m, 1H), 2.71–2.63 (m, 1H), 2.63–2.52 (m, 3H), 2.43 (s, 1H), 1.31 (s, 3H), 0.74 (s, 3H) ppm.  $^{13}\text{C}$

NMR (150 MHz, CDCl<sub>3</sub>)  $\delta$  219.2, 143.8, 126.8, 125.3, 124.7, 86.4, 73.6, 54.4, 49.3, 34.5, 32.5, 20.5, 19.7 ppm. IR (KBr):  $\nu_{\max}$  = 3292, 2970, 2925, 1741, 1260, 1082, 801 cm<sup>-1</sup>. HRMS (ESI) (m/z): Calcd for C<sub>13</sub>H<sub>14</sub>OS, [M+H]<sup>+</sup>, 219.0838; found: 219.0833. [ $\alpha$ ]<sub>D</sub><sup>25</sup>: -152.5 (*c* 0.17, CHCl<sub>3</sub>). m.p.: 76.8–79.1 °C. HPLC (Chiral pak AS-H, *i*-PrOH/*n*-hexane = 10 : 90, flow rate = 1.0 mL/min, wave length = 210 nm): t<sub>R</sub> = 6.511 min (minor), t<sub>R</sub> = 9.147 min (major) (86% *ee*).

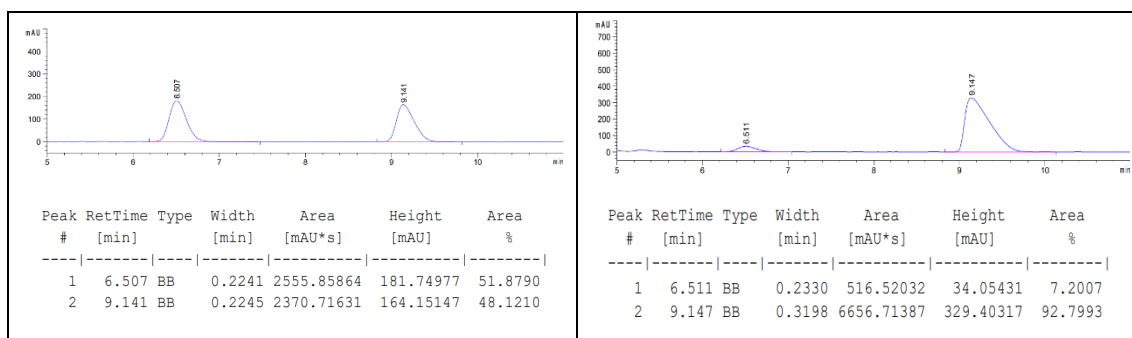

### (S)-3-ethynyl-2,2-dimethyl-3-(1-tosyl-1*H*-indol-3-yl)cyclopentan-1-one (**2ab**)

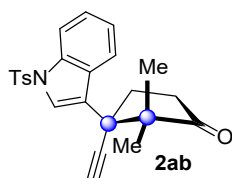

Purification by flash column chromatography on silica gel (petroleum ether/EtOAc = 3 : 1, R<sub>f</sub> = 0.24) afforded **2ab** (36.1 mg, 89%) as a white solid. <sup>1</sup>H NMR (400 MHz, CDCl<sub>3</sub>)  $\delta$  7.99 (t, *J* = 8.4 Hz, 2H), 7.75 (d, *J* = 8.3 Hz, 2H), 7.48 (s, 1H), 7.32 (t, *J* = 7.6 Hz, 1H), 7.23 (t, *J* = 7.0 Hz, 3H), 2.81–2.53 (m, 3H), 2.52–2.44 (m, 1H), 2.43 (s, 1H), 2.35 (s, 3H), 1.38 (s, 3H), 0.61 (s, 3H) ppm. <sup>13</sup>C NMR (100 MHz, CDCl<sub>3</sub>)  $\delta$  219.4, 145.3, 135.7, 135.0, 130.1, 129.6, 127.0, 125.0, 123.7, 123.1, 122.8, 121.2, 113.8, 85.5, 74.2, 54.5, 46.8, 34.4, 31.2, 21.7, 21.1, 20.8 ppm. IR (KBr):  $\nu_{\max}$  = 3291, 2974, 2873, 1741, 1371, 1179, 1135, 1090, 579 cm<sup>-1</sup>. HRMS (ESI) (m/z): Calcd for C<sub>24</sub>H<sub>23</sub>NO<sub>3</sub>S, [M+Na]<sup>+</sup>, 428.1291; found: 428.1295. [ $\alpha$ ]<sub>D</sub><sup>25</sup>: -52.9 (*c* 0.87, CHCl<sub>3</sub>). m.p.: 182.9–184.2 °C. HPLC (Chiral pak AS-H, *i*-PrOH/*n*-hexane = 20 : 80, flow rate = 1.0 mL/min, wave length = 210 nm): t<sub>R</sub> = 18.323 min (minor), t<sub>R</sub> = 26.388 min (major) (90% *ee*).

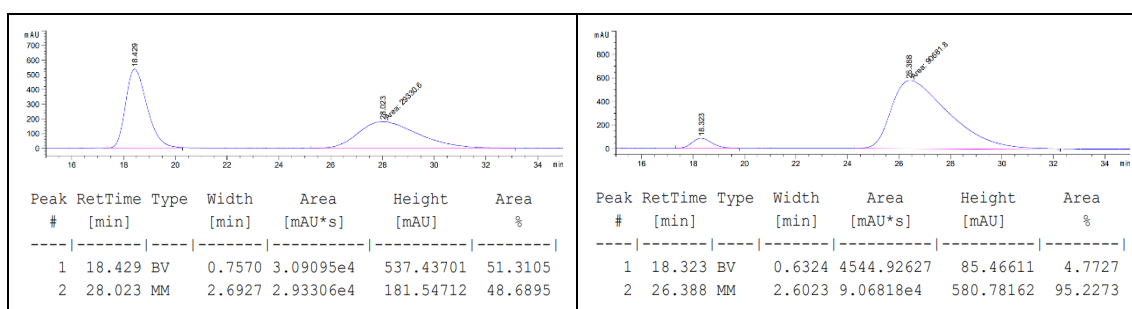

**(S)-3-ethynyl-2,2,3-trimethylcyclopentan-1-one (2ac)**

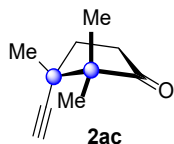

Purification by flash column chromatography on silica gel (petroleum ether/EtOAc = 10 : 1,  $R_f$  = 0.45) afforded **2ac** (9.0 mg, 60%) as a white solid.  $^1\text{H NMR}$  (400 MHz,  $\text{CDCl}_3$ )  $\delta$  2.50–2.40 (m, 1H), 2.33–2.19 (m, 3H), 1.96–1.88 (m, 1H), 1.23 (s, 3H), 1.14 (s, 3H), 0.94 (s, 3H) ppm.  $^{13}\text{C NMR}$  (150 MHz,  $\text{CDCl}_3$ )  $\delta$  220.9, 88.2, 71.3, 52.2, 42.2, 34.1, 33.2, 22.6, 21.0, 18.6 ppm. **IR** (KBr):  $\nu_{\text{max}}$  = 3251, 2972, 2931, 1732, 1274, 701  $\text{cm}^{-1}$ .  $[\alpha]_{\text{D}}^{25}$ :  $-28$  ( $c$  0.44,  $\text{CHCl}_3$ ). **m.p.**: 52.1–54.8  $^{\circ}\text{C}$ . *Ee* value of **2ac** was determined to be 83% based on HPLC analysis of its derivative **12**.

**Transformation of 2ac to 12:**

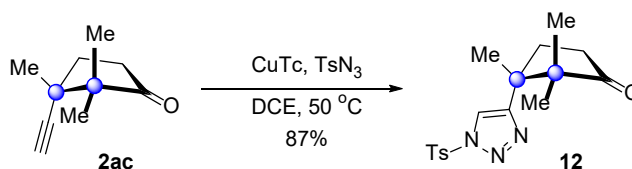

**Preparation of (R)-2,2,3-trimethyl-3-(1-tosyl-1H-1,2,3-triazol-4-yl)cyclopentan-1-one (12).** To a solution of **2ac** (15.0 mg, 0.1 mmol, 1 equiv) in DCE (1.0 mL) was added CuTc (38 mg, 0.2 mmol, 2 equiv) and TsN<sub>3</sub> (39 mg, 0.2 mmol, 2 equiv). The reaction was stirred at 50  $^{\circ}\text{C}$  for 4 h, and the mixture was concentrated in vacuo. The resulting crude product was purified by flash column chromatography on silica gel (petroleum ether/EtOAc = 3 : 1,  $R_f$  = 0.15) to afford **12** (30.2 mg, 87%) as a white solid.  $^1\text{H NMR}$  (400 MHz,  $\text{CDCl}_3$ )  $\delta$  7.99 (d,  $J$  = 8.4 Hz, 2H), 7.91 (s, 1H), 7.39 (d,  $J$  = 8.1 Hz, 2H), 2.66–2.51 (m, 2H), 2.47–2.37 (m, 4H), 2.04–1.94 (m, 1H), 1.30 (s, 3H), 1.07 (s, 3H), 0.63 (s, 3H) ppm.  $^{13}\text{C NMR}$  (150 MHz,  $\text{CDCl}_3$ )  $\delta$  221.2, 152.5, 147.5, 133.2, 130.6, 128.8, 120.1, 52.9, 44.4, 33.8, 30.9, 23.2, 22.0, 21.5, 18.8 ppm. **IR** (KBr):  $\nu_{\text{max}}$  = 2972, 2924, 1739, 1390, 1194, 1177, 673  $\text{cm}^{-1}$ . **HRMS** (ESI) ( $m/z$ ): Calcd for  $\text{C}_{17}\text{H}_{21}\text{N}_3\text{O}_3\text{S}$ ,  $[\text{M}+\text{Na}]^+$ , 370.1196; found: 370.1196.  $[\alpha]_{\text{D}}^{25}$ :  $-53.3$  ( $c$  0.09,  $\text{CHCl}_3$ ). **m.p.**: 113.4–116.5  $^{\circ}\text{C}$ . **HPLC** (Chiral pak AD-H, *i*-PrOH/*n*-hexane = 3 : 97, flow rate = 1.0 mL/min, wave length = 210 nm):  $t_{\text{R}}$  = 40.056 min (minor),  $t_{\text{R}}$  = 41.872 min (major) (83% *ee*).

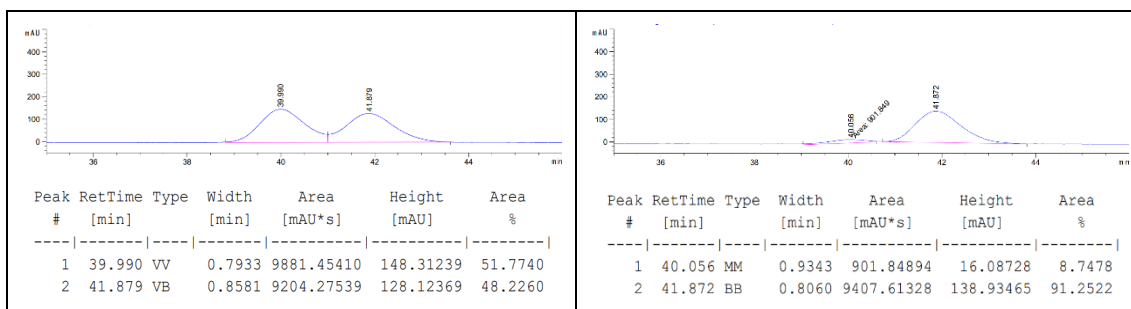

### (S)-4-ethynyl-4-phenylspiro[4.4]nonan-1-one (2ad)

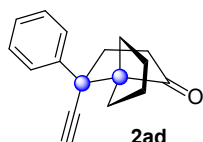

Purification by flash column chromatography on silica gel (petroleum ether/EtOAc = 10 : 1,  $R_f$  = 0.6) afforded **2ad** (23.3 mg, 98%) as a white solid.  $^1\text{H}$  NMR (600 MHz,  $\text{CDCl}_3$ )  $\delta$  7.54 (d,  $J$  = 7.6 Hz, 2H), 7.36 (t,  $J$  = 7.5 Hz, 2H), 7.30 (t,  $J$  = 7.2 Hz, 1H), 2.72–2.65 (m, 1H), 2.62–2.49 (m, 2H), 2.40–2.31 (m, 2H), 2.06 (t,  $J$  = 7.4 Hz, 2H), 1.71–1.65 (m, 1H), 1.51–1.42 (m, 2H), 1.38–1.32 (m, 1H), 1.27 (q,  $J$  = 8.2, 5.7 Hz, 1H), 1.21–1.15 (m, 1H) ppm.  $^{13}\text{C}$  NMR (150 MHz,  $\text{CDCl}_3$ )  $\delta$  219.7, 139.5, 128.3, 127.8, 127.5, 87.7, 72.8, 65.6, 51.2, 34.2, 31.9, 31.3, 26.2, 26.1 ppm. IR (KBr):  $\nu_{\text{max}}$  = 3291, 2955, 2869, 1735, 1448, 1084, 1032, 700  $\text{cm}^{-1}$ . HRMS (ESI) ( $m/z$ ): Calcd for  $\text{C}_{17}\text{H}_{18}\text{O}$ ,  $[\text{M}+\text{Na}]^+$ , 261.1250; found: 261.1243.  $[\alpha]_{\text{D}}^{25}$ :  $-112.5$  ( $c$  0.51,  $\text{CHCl}_3$ ). **m.p.**: 78.3–80.0  $^{\circ}\text{C}$ . HPLC (Chiral pak AS-H, *i*-PrOH/*n*-hexane = 10 : 90, flow rate = 1.0 mL/min, wave length = 210 nm):  $t_{\text{R}}$  = 6.086 min (minor),  $t_{\text{R}}$  = 12.399 min (major) (80% *ee*).

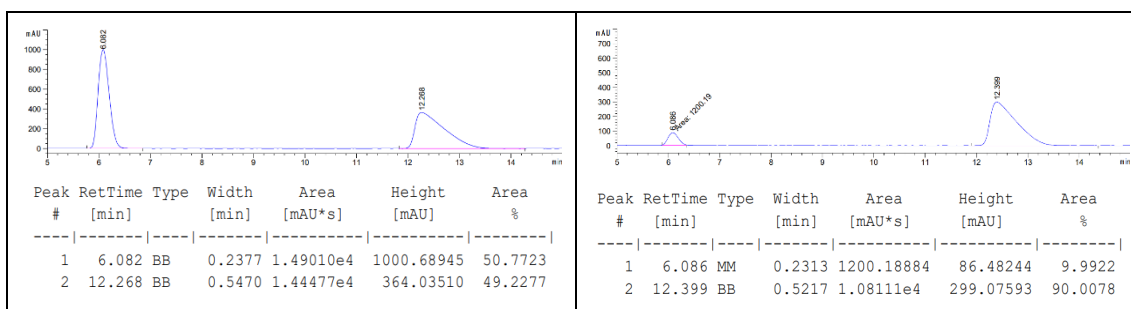

### 4-((S)-1-ethynyl-2,2-dimethyl-3-oxocyclopentyl)phenyl (3aR,5aR,8aR,8bS)-2,2,7,7-tetramethyltetrahydro-3aH-bis([1,3]dioxolo)[4,5-b:4',5'-d]pyran-3a-carboxylate (2ae)

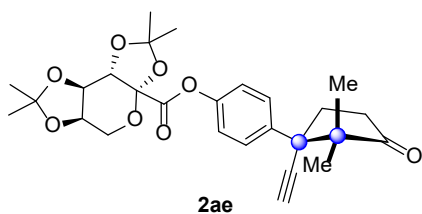

Purification by flash column chromatography on silica gel (petroleum ether/EtOAc = 3 : 1,  $R_f$  = 0.32) afforded **2ae** (30.1 mg, 62%) as a white solid.  $^1\text{H NMR}$  (600 MHz,  $\text{CDCl}_3$ )  $\delta$  7.53 (d,  $J$  = 8.4 Hz, 2H), 7.15 (d,  $J$  = 8.4 Hz, 2H), 4.87 (d,  $J$  = 2.5 Hz, 1H), 4.69 (dd,  $J$  = 7.9, 2.5 Hz, 1H), 4.31 (d,  $J$  = 7.9 Hz, 1H), 4.00–3.92 (m, 2H), 2.77–2.69 (m, 2H), 2.61–2.54 (m, 1H), 2.40–2.31 (m, 2H), 1.61 (s, 3H), 1.51 (d,  $J$  = 4.2 Hz, 6H), 1.37 (s, 3H), 1.25 (s, 3H), 0.61 (s, 3H) ppm.  $^{13}\text{C NMR}$  (150 MHz,  $\text{CDCl}_3$ )  $\delta$  219.5, 166.8, 150.1, 136.8, 128.9, 128.7, 121.1, 115.2, 111.0, 109.7, 100.0, 87.1, 73.9, 73.0, 70.5, 70.1, 61.9, 54.3, 51.6, 34.6, 29.9, 26.3, 26.2, 24.7, 24.6, 20.4, 19.8 ppm. **IR** (KBr):  $\nu_{\text{max}}$  = 3291, 2989, 2926, 1742, 1629, 1253, 1073, 548  $\text{cm}^{-1}$ . **HRMS** (ESI) ( $m/z$ ): Calcd for  $\text{C}_{27}\text{H}_{32}\text{O}_8$ ,  $[\text{M}+\text{Na}]^+$ , 507.1989; found: 507.1994.  $[\alpha]_{\text{D}}^{25}$ :  $-63.5$  ( $c$  0.18,  $\text{CHCl}_3$ ). **m.p.**: 115.5–117.9  $^{\circ}\text{C}$ . **HPLC** (Chiral pak AD-H, *i*-PrOH/*n*-hexane = 15 : 85, flow rate = 1.0 mL/min, wave length = 210 nm):  $t_{\text{R}}$  = 17.443 min (major),  $t_{\text{R}}$  = 23.439 min (minor) (96 : 4 *dr*).

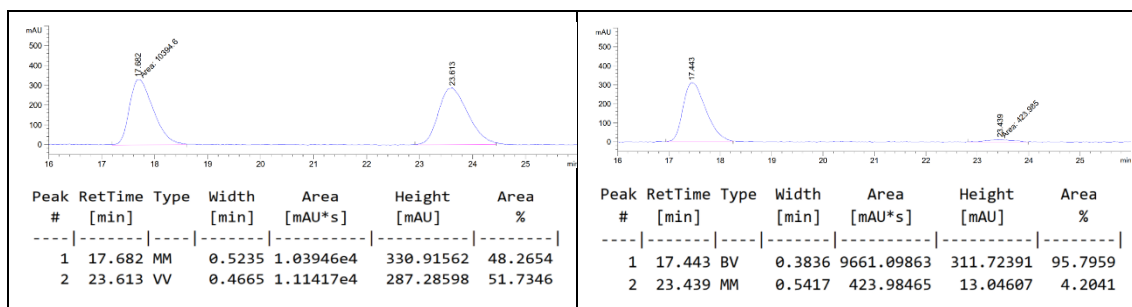

**4-((*R*)-1-ethynyl-2,2-dimethyl-3-oxocyclopentyl)phenyl (3*aR*,5*aR*,8*aR*,8*bS*)-2,2,7,7-tetramethyltetrahydro-3*aH*-bis([1,3]dioxolo)[4,5-*b*:4',5'-*d*]pyran-3*a*-carboxylate (2ae')**

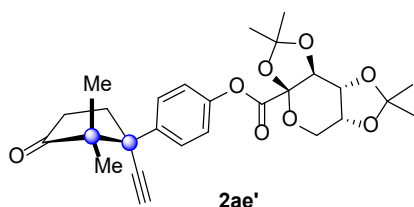

**2ae'** was prepared following the general procedure using *ent*-**L12**. Purification by flash column chromatography on silica gel (petroleum ether/EtOAc = 3 : 1,  $R_f$  = 0.32) afforded **2ae'** (33 mg, 68%) as a white solid.  $^1\text{H NMR}$  (600 MHz,  $\text{CDCl}_3$ )  $\delta$  7.55–7.50 (m, 2H), 7.15 (d,  $J$  = 8.6 Hz, 2H), 4.87 (d,  $J$  = 2.5 Hz, 1H), 4.69 (dd,  $J$  = 7.9, 2.5 Hz, 1H), 4.31 (d,  $J$  = 7.9 Hz, 1H), 3.99–3.93 (m, 2H), 2.77–2.69 (m, 2H), 2.62–2.53 (m, 1H), 2.39 (s, 1H), 2.38–2.32 (m, 1H), 1.61 (s, 3H), 1.51 (d,  $J$  = 3.5 Hz, 6H), 1.37 (s, 3H), 1.25 (s, 3H), 0.61 (s, 3H) ppm.  $^{13}\text{C NMR}$  (150 MHz,  $\text{CDCl}_3$ )  $\delta$  219.5, 166.8, 150.1, 136.8, 128.8, 121.1, 111.0, 109.7, 100.0, 87.1, 73.9, 73.0, 70.5, 70.1, 61.9, 54.3, 51.6, 34.6, 29.9, 26.3, 26.2, 24.7, 24.6, 20.4, 19.8 ppm. **IR** (KBr):  $\nu_{\text{max}}$  = 3273, 2984, 2934, 1742, 1507, 1382, 1253, 1073, 873  $\text{cm}^{-1}$ . **HRMS** (ESI) ( $m/z$ ): Calcd for  $\text{C}_{27}\text{H}_{32}\text{O}_8$ ,  $[\text{M}+\text{Na}]^+$ , 507.1989; found: 507.1989.  $[\alpha]_{\text{D}}^{25}$ :  $+11.6$  ( $c$

0.08, CHCl<sub>3</sub>). **m.p.**: 127.4–129.5 °C. **HPLC** (Chiral pak AD-H, *i*-PrOH/*n*-hexane = 15 : 85, flow rate = 1.0 mL/min, wave length = 210 nm):  $t_R$  = 17.782 min (minor),  $t_R$  = 23.639 min (major) (96 : 4 *dr*).

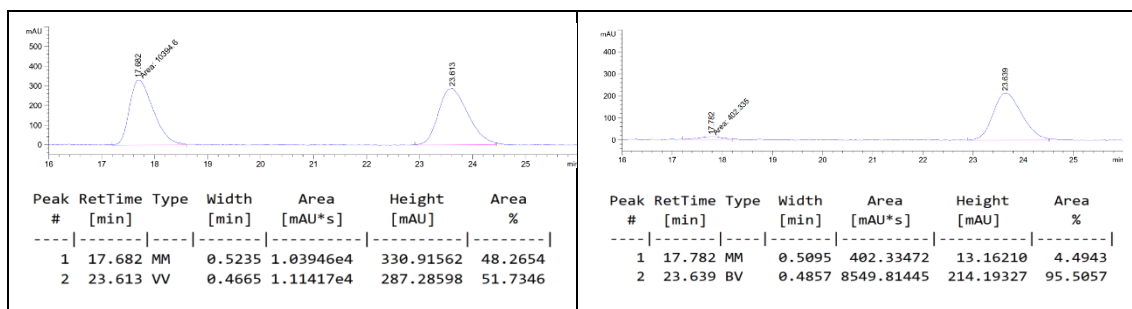

#### 4-((*S*)-1-ethynyl-2,2-dimethyl-3-oxocyclopentyl)phenyl (*S*)-2-(6-methoxynaphthalen-2-yl)propanoate (**2af**)

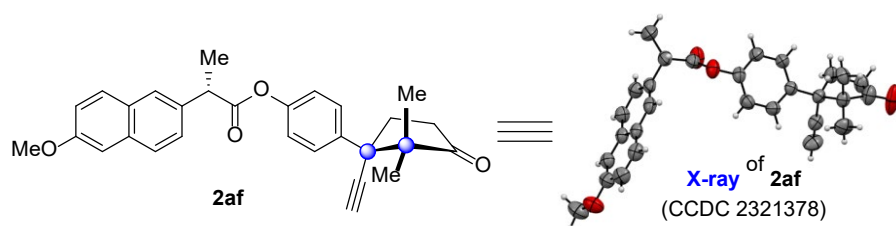

Purification by flash column chromatography on silica gel (petroleum ether/EtOAc = 5 : 1,  $R_f$  = 0.25) afforded **2af** (40.1 mg, 91%) as a white solid. The colorless crystal of **2af** for X-ray crystallographic analysis was obtained by slow diffusion of *n*-hexane to a solution of **2af** in EtOAc. <sup>1</sup>H NMR (600 MHz, CDCl<sub>3</sub>)  $\delta$  7.80–7.72 (m, 3H), 7.50 (d,  $J$  = 8.5 Hz, 1H), 7.46 (d,  $J$  = 8.4 Hz, 2H), 7.21–7.10 (m, 2H), 7.01 (d,  $J$  = 8.5 Hz, 2H), 4.11 (q,  $J$  = 7.1 Hz, 1H), 3.92 (s, 3H), 2.77–2.65 (m, 2H), 2.60–2.50 (m, 1H), 2.40–2.28 (m, 2H), 1.70 (d,  $J$  = 7.1 Hz, 3H), 1.22 (s, 3H), 0.58 (s, 3H) ppm. <sup>13</sup>C NMR (150 MHz, CDCl<sub>3</sub>)  $\delta$  219.6, 173.2, 157.9, 150.2, 136.3, 135.2, 134.0, 129.4, 129.1, 128.6, 127.5, 126.3, 126.2, 121.2, 119.3, 105.8, 87.1, 73.7, 55.5, 54.3, 51.5, 45.7, 34.6, 29.8, 20.3, 19.7, 18.6 ppm. **IR** (KBr):  $\nu_{max}$  = 3293, 2970, 2929, 1744, 1604, 1266, 1171, 852 cm<sup>-1</sup>. **HRMS** (ESI) ( $m/z$ ): Calcd for C<sub>29</sub>H<sub>28</sub>O<sub>4</sub>, [M+Na]<sup>+</sup>, 463.1880; found: 463.1872. [ $\alpha$ ]<sub>D</sub><sup>25</sup>: -19.7 (*c* 0.30, CHCl<sub>3</sub>). **m.p.**: 140.0–141.0 °C. **HPLC** (Chiral pak AS-H, *i*-PrOH/*n*-hexane = 30 : 70, flow rate = 1.0 mL/min, wave length = 210 nm):  $t_R$  = 10.223 min (minor),  $t_R$  = 21.095 min (major) (98 : 2 *dr*).

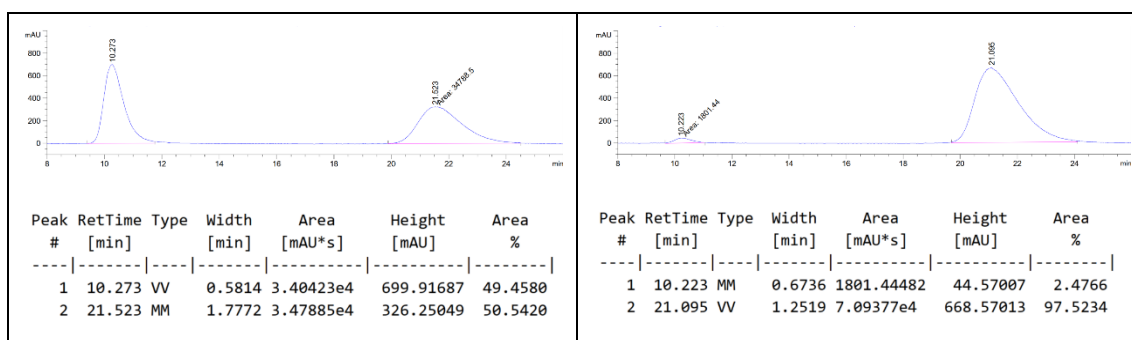



4-((*R*)-1-ethynyl-2,2-dimethyl-3-oxocyclopentyl)phenyl (*S*)-2-(6-methoxynaphthalen-2-yl)propanoate (**2af'**)

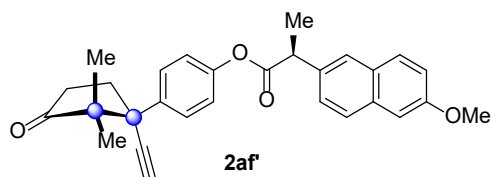

**2af'** was prepared following the general procedure using *ent*-**L12**. Purification by flash column chromatography on silica gel (petroleum ether/EtOAc = 5 : 1,  $R_f$  = 0.25) afforded **2af'** (38.9 mg, 88%) as a white solid.  $^1\text{H NMR}$  (600 MHz,  $\text{CDCl}_3$ )  $\delta$  7.79–7.71 (m, 3H), 7.50 (d,  $J$  = 8.5 Hz, 1H), 7.46 (d,  $J$  = 8.6 Hz, 2H), 7.18–7.12 (m, 2H), 7.01 (d,  $J$  = 8.4 Hz, 2H), 4.10 (q,  $J$  = 7.1 Hz, 1H), 3.93 (s, 3H), 2.75–2.66 (m, 2H), 2.59–2.51 (m, 1H), 2.39–2.30 (m, 2H), 1.70 (d,  $J$  = 7.1 Hz, 3H), 1.22 (s, 3H), 0.58 (s, 3H) ppm.  $^{13}\text{C NMR}$  (150 MHz,  $\text{CDCl}_3$ )  $\delta$  219.6, 173.2, 157.9, 150.3, 136.3, 135.2, 134.0, 129.5, 129.1, 128.6, 127.5, 126.3, 126.2, 121.2, 119.3, 105.8, 87.1, 73.7, 55.5, 54.3, 51.5, 45.7, 34.6, 29.8, 20.4, 19.8, 18.6 ppm. IR (KBr):  $\nu_{\text{max}}$  = 3266, 2921, 1737, 1603, 1169, 744  $\text{cm}^{-1}$ . HRMS (ESI) ( $m/z$ ): Calcd for  $\text{C}_{29}\text{H}_{28}\text{O}_4$ ,  $[\text{M}+\text{Na}]^+$ , 463.1880; found: 463.1876.  $[\alpha]_{\text{D}}^{25}$ : +141 ( $c$  0.18,  $\text{CHCl}_3$ ). **m.p.**: 152.1–153.6  $^{\circ}\text{C}$ . HPLC (Chiral pak AS-H, *i*-PrOH/*n*-hexane = 30 : 70, flow rate = 1.0 mL/min, wave length = 210 nm):  $t_{\text{R}}$  = 10.222 min (major),  $t_{\text{R}}$  = 21.484 min (minor) (98 : 2 *dr*).

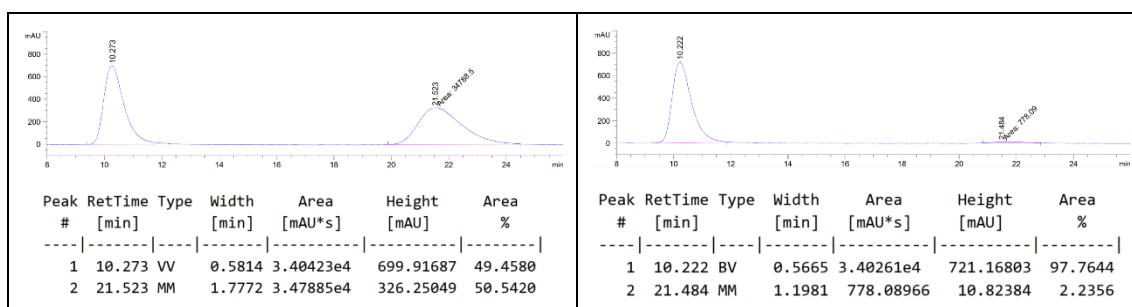

(*S*)-4-(1-ethynyl-2,2-dimethyl-3-oxocyclopentyl)phenyl 2-(1-(4-chlorobenzoyl)-5-methoxy-2-methyl-1H-indol-3-yl)acetate (**2ag**)

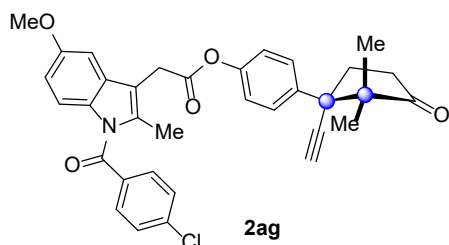

**2ag** was prepared using **L12**. Purification by flash column chromatography on silica gel (petroleum ether/EtOAc = 3 : 1,  $R_f$  = 0.32) afforded **2ag** (31.2 mg, 55%) as a white solid.  $^1\text{H NMR}$  (600 MHz,  $\text{CDCl}_3$ )  $\delta$  7.68 (d,  $J$  = 8.2 Hz, 2H), 7.49 (dd,  $J$  = 11.0, 8.4 Hz, 4H), 7.12–7.05 (m, 3H), 6.89 (d,  $J$  = 9.0 Hz, 1H), 6.70 (dd,  $J$  = 9.1, 2.5 Hz, 1H), 3.91 (s, 2H), 3.84 (s, 3H), 2.78–2.64 (m, 2H), 2.63–2.51 (m, 1H), 2.46 (s, 3H), 2.38 (s, 1H), 2.37–2.32 (m,

1H), 1.24 (s, 3H), 0.60 (s, 3H) ppm.  $^{13}\text{C NMR}$  (150 MHz,  $\text{CDCl}_3$ )  $\delta$  219.5, 169.3, 168.5, 156.3, 150.1, 139.5, 136.6, 136.4, 134.0, 131.4, 131.0, 130.6, 129.3, 128.7, 121.2, 115.2, 112.1, 111.9, 101.4, 87.1, 73.8, 55.9, 54.3, 51.5, 34.6, 30.8, 29.9, 20.4, 19.8, 13.6 ppm. **IR** (KBr):  $\nu_{\text{max}}$  = 3296, 2926, 2859, 1743, 1684, 1506, 1319, 1128, 737  $\text{cm}^{-1}$ . **HRMS** (ESI) (m/z): Calcd for  $\text{C}_{34}\text{H}_{30}\text{ClNO}_5$ ,  $[\text{M}+\text{Na}]^+$ , 590.1705; found: 590.1708.  $[\alpha]_{\text{D}}^{25}$ :  $-45.8$  ( $c$  0.36,  $\text{CHCl}_3$ ). **m.p.**: 80.3–81.2 °C. **HPLC** (Chiral pak AS-H, *i*-PrOH/*n*-hexane = 35 : 65, flow rate = 1.0 mL/min, wave length = 210 nm):  $t_{\text{R}}$  = 16.548 min (minor),  $t_{\text{R}}$  = 34.698 min (major) (92% *ee*).

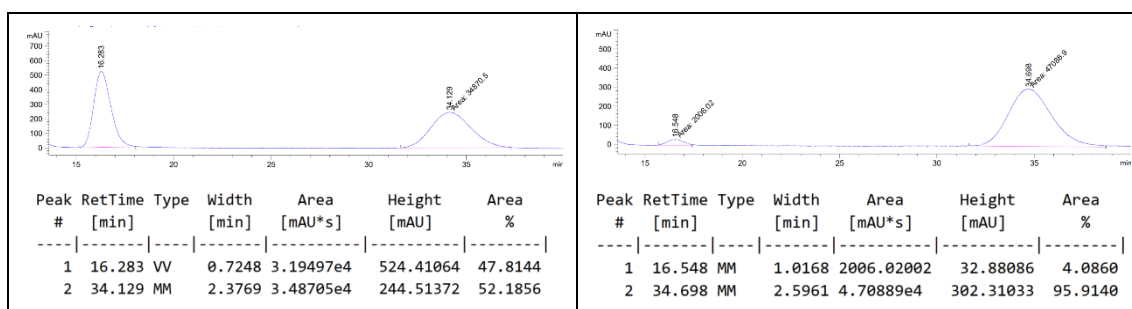

### (S)-2,2-diethyl-3-ethynyl-3-phenylcyclopentan-1-one (2ai)

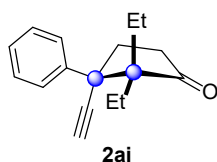

Purification by flash column chromatography on silica gel (petroleum ether/EtOAc = 5 : 1,  $R_f$  = 0.66) afforded **2ai** (9.1 mg, 38%) as a colorless oil.  $^1\text{H NMR}$  (400 MHz,  $\text{CDCl}_3$ )  $\delta$  7.55 (d,  $J$  = 7.3 Hz, 2H), 7.32 (q,  $J$  = 9.0, 8.0 Hz, 3H), 2.75–2.59 (m, 2H), 2.59–2.41 (m, 3H), 2.15 (dq,  $J$  = 15.0, 7.5 Hz, 1H), 1.80 (dq,  $J$  = 15.2, 7.6 Hz, 1H), 1.60 (d,  $J$  = 7.7 Hz, 1H), 0.99 (dq,  $J$  = 14.7, 7.4 Hz, 1H), 0.71 (td,  $J$  = 7.5, 1.8 Hz, 6H) ppm.  $^{13}\text{C NMR}$  (150 MHz,  $\text{CDCl}_3$ )  $\delta$  217.0, 141.9, 128.7, 127.4, 126.2, 84.2, 75.7, 62.0, 49.9, 38.1, 36.4, 19.9, 12.8 ppm. **IR** (KBr):  $\nu_{\text{max}}$  = 3449, 2923, 1734, 1640, 1396, 570  $\text{cm}^{-1}$ . **HRMS** (ESI) (m/z): Calcd for  $\text{C}_{17}\text{H}_{20}\text{O}$ ,  $[\text{M}+\text{H}]^+$ , 241.1587; found: 241.1591. **HPLC** (Chiral pak OD-H, *i*-PrOH/*n*-hexane = 5 : 95, flow rate = 1.0 mL/min, wave length = 210 nm):  $t_{\text{R}}$  = 5.787 min (minor),  $t_{\text{R}}$  = 6.417 min (major) (7% *ee*).

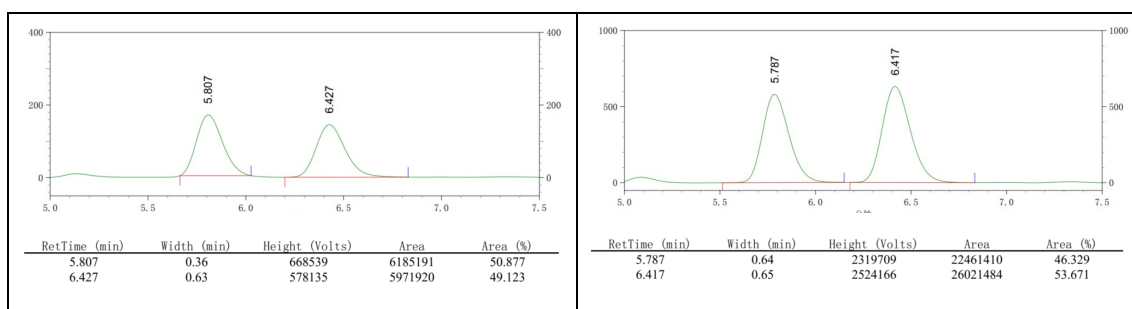

### (S)-4-ethynyl-4-phenylspiro[4.5]decan-1-one (2aj)

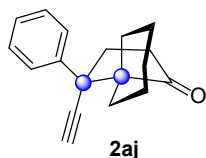

Purification by flash column chromatography on silica gel (petroleum ether/EtOAc = 5 : 1,  $R_f$  = 0.66) afforded **2aj** (13.9 mg, 55%) as a colorless oil.  $^1\text{H NMR}$  (400 MHz,  $\text{CDCl}_3$ )  $\delta$  7.52 (d,  $J$  = 7.3 Hz, 2H), 7.37 (t,  $J$  = 7.4 Hz, 2H), 7.34–7.27 (m, 1H), 2.84 (dt,  $J$  = 12.3, 9.4 Hz, 1H), 2.69 (dt,  $J$  = 19.0, 9.4 Hz, 1H), 2.57–2.46 (m, 1H), 2.41 (s, 1H), 2.29 (ddd,  $J$  = 11.9, 9.3, 2.2 Hz, 1H), 2.20 (dd,  $J$  = 13.4, 3.3 Hz, 1H), 2.08 (qt,  $J$  = 13.2, 4.2 Hz, 1H), 1.52 (qd,  $J$  = 13.8, 13.3, 6.2 Hz, 3H), 1.41–1.21 (m, 4H), 0.86–0.76 (m, 1H), 0.68 (ddd,  $J$  = 13.2, 10.9, 5.4 Hz, 1H) ppm.  $^{13}\text{C NMR}$  (100 MHz,  $\text{CDCl}_3$ )  $\delta$  219.2, 138.3, 128.4, 128.1, 127.5, 87.2, 73.9, 56.0, 53.2, 35.0, 29.6, 28.8, 28.2, 25.4, 21.8, 21.6 ppm. **IR** (KBr):  $\nu_{\text{max}}$  = 3292, 2929, 2857, 1732, 1452, 699  $\text{cm}^{-1}$ . **HRMS** (ESI) ( $m/z$ ): Calcd for  $\text{C}_{18}\text{H}_{20}\text{O}$ ,  $[\text{M}+\text{H}]^+$ , 253.1587; found: 253.1589. **HPLC** (Chiral pak AS-H, *i*-PrOH/*n*-hexane = 2 : 98, flow rate = 1.0 mL/min, wave length = 220 nm):  $t_R$  = 6.771 min (minor),  $t_R$  = 7.636 min (major) (20% *ee*).

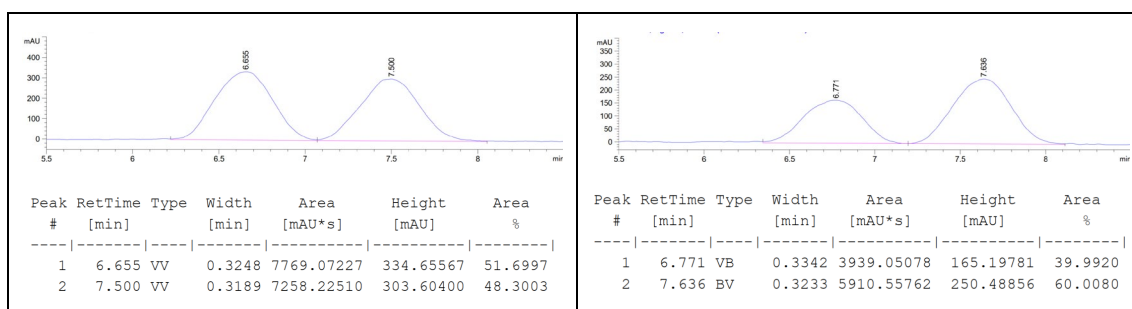

### (S)-3-ethynyl-3-phenylcyclopentan-1-one (2ak)

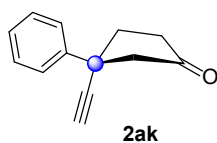

Purification by flash column chromatography on silica gel (petroleum ether/EtOAc = 10 : 1,  $R_f$  = 0.63) afforded **2ak** (17.5 mg, 95%) as a colorless oil.  $^1\text{H NMR}$  (600 MHz,  $\text{CDCl}_3$ )  $\delta$  7.52 (d,  $J$  = 7.6 Hz, 2H), 7.39 (t,  $J$  = 7.6 Hz, 2H), 7.30 (t,  $J$  = 7.4 Hz, 1H), 2.86 (d,  $J$  = 17.6 Hz, 1H), 2.73–2.65 (m, 2H), 2.62 (td,  $J$  = 10.3, 8.5, 2.4 Hz, 1H), 2.47–2.40 (m, 2H), 2.38–2.31 (m, 1H) ppm.  $^{13}\text{C NMR}$  (150 MHz,  $\text{CDCl}_3$ )  $\delta$  215.9, 142.4, 128.9, 127.5, 126.0, 87.8, 72.3, 52.9, 43.9, 38.1, 37.3 ppm. **IR** (KBr):  $\nu_{\text{max}}$  = 3414, 2921, 1743, 1620, 1145, 622  $\text{cm}^{-1}$ . **HRMS** (ESI) ( $m/z$ ): Calcd for  $\text{C}_{13}\text{H}_{12}\text{O}$ ,  $[\text{M}+\text{H}]^+$ , 185.0961; found: 185.0962. **HPLC** (Chiral pak OD-H, *i*-PrOH/*n*-hexane = 5 : 95, flow rate = 1.0 mL/min, wave length = 210 nm):  $t_R$  = 13.857 min (major),  $t_R$  = 17.740 min (minor) (69% *ee*).

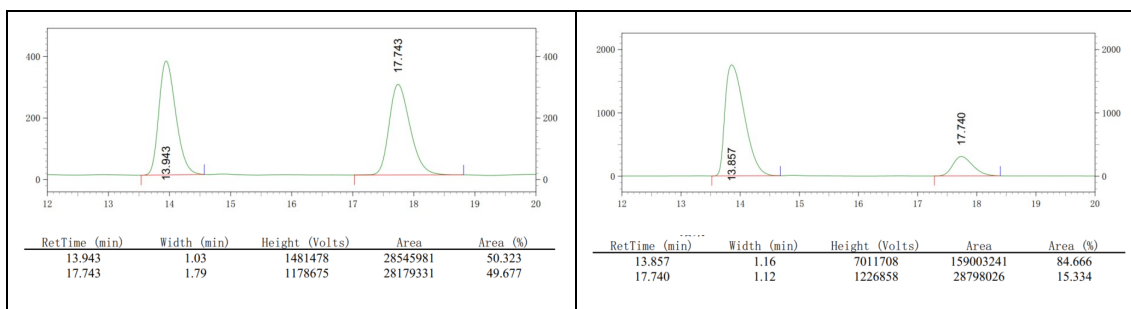

### (*R*)-3-benzyl-3-ethynyl-2,2-dimethylcyclopentan-1-one (**2al**)

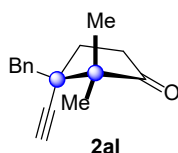

The generation of **2al** was not detected under standard conditions.

### (*S*)-3-butyl-3-ethynyl-2,2-dimethylcyclopentan-1-one (**2am**)

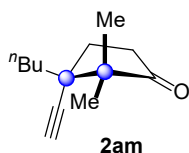

Purification by flash column chromatography on silica gel (petroleum ether/EtOAc = 10 : 1,  $R_f$  = 0.41) afforded **2am** (3 mg, 16%) as a colorless oil.  $^1\text{H NMR}$  (600 MHz,  $\text{CDCl}_3$ )  $\delta$  2.45 (dt,  $J$  = 18.7, 9.2 Hz, 1H), 2.33–2.28 (m, 1H), 2.23–2.14 (m, 2H), 1.90 (dt,  $J$  = 12.9, 9.0 Hz, 1H), 1.62–1.57 (m, 1H), 1.53 (dd,  $J$  = 12.4, 4.1 Hz, 1H), 1.46–1.41 (m, 1H), 1.38–1.33 (m, 3H), 1.18 (s, 3H), 0.97–0.91 (m, 6H) ppm.  $^{13}\text{C NMR}$  (150 MHz,  $\text{CDCl}_3$ )  $\delta$  221.4, 87.2, 72.8, 52.7, 46.9, 34.4, 34.3, 30.9, 27.5, 23.4, 20.8, 19.0, 14.2 ppm. **IR** (KBr):  $\nu_{\text{max}}$  = 3413, 2922, 1734, 1628, 614  $\text{cm}^{-1}$ . **HRMS** (ESI) ( $m/z$ ): Calcd for  $\text{C}_{13}\text{H}_{22}\text{O}$ ,  $[\text{M}+\text{H}]^+$ , 185.0961; found: 185.0962. Ee value of **2am** was determined to be 49% based on HPLC analysis of its derivative **13**.

### Transformation of **2am** to **13**:

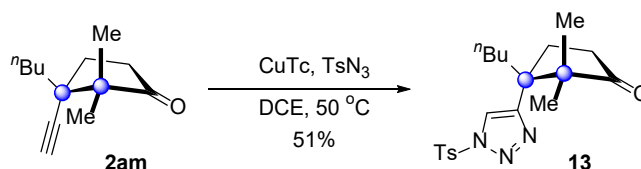

**Preparation of (*R*)-3-butyl-2,2-dimethyl-3-(1-tosyl-1H-1,2,3-triazol-4-yl)cyclopentan-1-one (**13**).** To a solution of **2am** (2 mg, 0.01 mmol, 1 equiv) in DCE (0.5 mL) was added CuTc (3.8 mg, 0.02 mmol, 2 equiv) and TsN<sub>3</sub> (3.9 mg, 0.02 mmol, 2 equiv). The reaction was stirred at 50 °C for 4 h, and the mixture was concentrated in vacuo. The

resulting crude product was purified by flash column chromatography on silica gel (petroleum ether/EtOAc = 3 : 1,  $R_f$  = 0.42) to afford **13** (2 mg, 51%) as a colorless oil.  $^1\text{H}$  NMR (400 MHz,  $\text{CDCl}_3$ )  $\delta$  7.97 (d,  $J$  = 8.3 Hz, 2H), 7.87 (s, 1H), 7.39 (d,  $J$  = 8.2 Hz, 2H), 2.57–2.49 (m, 1H), 2.46 (s, 3H), 2.42–2.28 (m, 2H), 2.24–2.15 (m, 1H), 1.93–1.85 (m, 1H), 1.40–1.32 (m, 2H), 1.24–1.17 (m, 3H), 1.13 (s, 3H), 0.78 (t,  $J$  = 7.2 Hz, 3H), 0.59 (s, 3H).  $^{13}\text{C}$  NMR (150 MHz,  $\text{CDCl}_3$ )  $\delta$  221.3, 151.0, 147.4, 133.2, 130.6, 128.7, 120.9, 53.6, 48.1, 34.1, 33.6, 27.0, 25.7, 23.2, 22.0, 18.3, 14.1. **IR** (KBr):  $\nu_{\text{max}}$  = 3412, 2922, 1622, 1093, 619, 478  $\text{cm}^{-1}$ . **HRMS** (ESI) ( $m/z$ ): Calcd for  $\text{C}_{20}\text{H}_{27}\text{N}_3\text{O}_3\text{S}$ ,  $[\text{M}+\text{H}]^+$ , 390.1846; found: 390.1857. **HPLC** (Chiral pak OD-H, *i*-PrOH/*n*-hexane = 15 : 85, flow rate = 1.0 mL/min, wave length = 220 nm):  $t_R$  = 9.335 min (minor),  $t_R$  = 10.102 min (major) (49% *ee*).

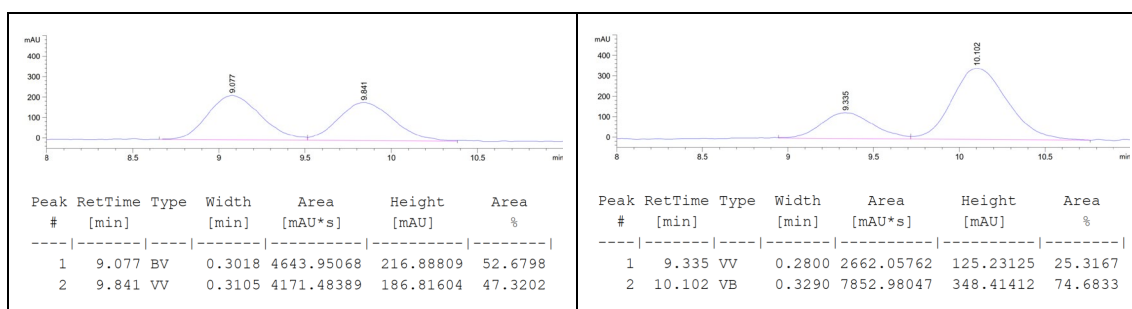

## 4. Synthetic Applications

### 4.1 Gram-scale reaction

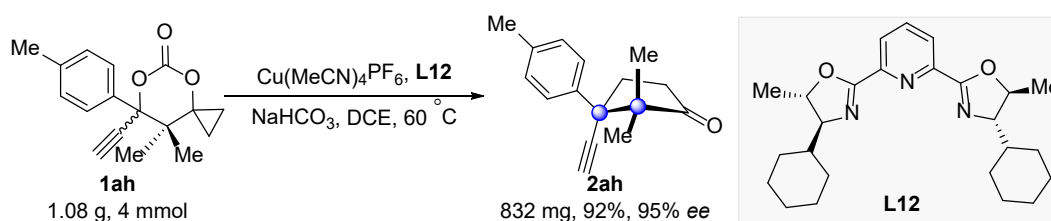

A mixture of  $\text{Cu}(\text{MeCN})_4\text{PF}_6$  (149 mg, 0.4 mmol, 10 mol%) and **L12** (197 mg, 0.48 mmol, 12 mol%) in anhydrous DCE (160 mL) in a flame-dried flask (500 mL) was stirred at room temperature for 30 min under a nitrogen atmosphere (balloon). Then **1ah** (1.08 g, 4 mmol) and  $\text{NaHCO}_3$  (336 mg, 4 mmol, 1 equiv) were added. The resulting mixture was stirred at 60 °C for 48 h, until **1ah** was fully consumed as monitored by the TLC analysis. The mixture was concentrated in vacuo, and the crude product was purified by flash column chromatography on silica gel (petroleum ether/EtOAc = 10 : 1) to afford **2ah** (832 mg, 92% yield, 92% *ee*) as a white solid.

## 4.2 Transformations of compound 2h

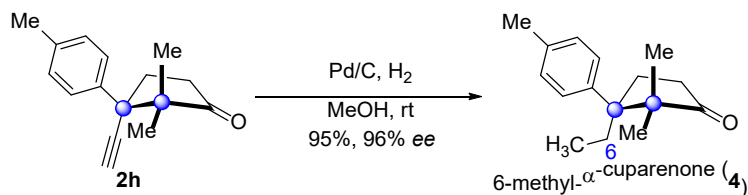

**Preparation of (*R*)-6-methyl- $\alpha$ -cuparenone (4).** To a solution of **2h** (22.6 mg, 0.1 mmol) in MeOH (1 mL) was added 10% Pd/C (10.6 mg, 0.01 mmol), and the reaction mixture was stirred for 4 h at the room temperature under an atmosphere of H<sub>2</sub> (balloon). The reaction mixture was filtered through a pad of celite, and the filtrate was concentrated in vacuo. The crude residue was purified by flash column chromatography on silica gel (petroleum ether/EtOAc = 10 : 1, R<sub>f</sub> = 0.71) to yield **4** (21.9 mg, 95%) as a light yellow oil. <sup>1</sup>H NMR (400 MHz, CDCl<sub>3</sub>)  $\delta$  7.25–7.09 (m, 4H), 2.51–2.39 (m, 2H), 2.34 (s, 3H), 2.18–2.12 (m, 1H), 1.97–1.88 (m, 1H), 1.35–1.25 (m, 2H), 1.19 (s, 3H), 0.63–0.59 (m, 6H) ppm. <sup>13</sup>C NMR (100 MHz, CDCl<sub>3</sub>)  $\delta$  222.9, 139.9, 135.8, 129.0, 127.1, 54.1, 52.4, 33.6, 27.7, 23.8, 22.6, 21.0, 18.2, 9.0 ppm. IR (KBr):  $\nu_{\text{max}}$  = 2973, 1736, 1460, 1266, 745 cm<sup>-1</sup>. HRMS (ESI) (m/z): Calcd for C<sub>16</sub>H<sub>22</sub>O, [M+Na]<sup>+</sup>, 253.1563; found: 253.1558. [ $\alpha$ ]<sub>D</sub><sup>25</sup>: -74 (c 0.10, CHCl<sub>3</sub>). HPLC (Chiral pak OD-H, *i*-PrOH/*n*-hexane = 0.5 : 99.5, flow rate = 1.0 mL/min, wave length = 210 nm): t<sub>R</sub> = 8.216 min (minor), t<sub>R</sub> = 9.000 min (major) (96% ee).

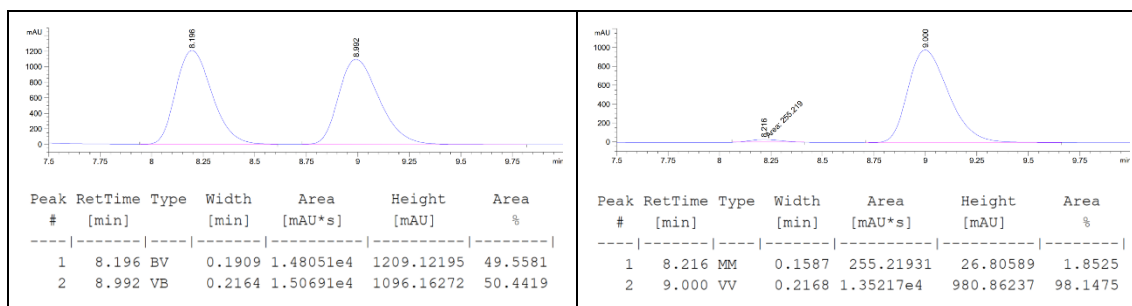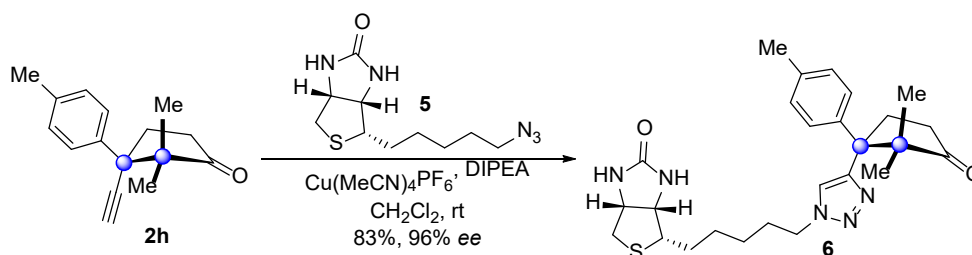

**Preparation of (3*aS*,4*S*,6*aR*)-4-(5-(4-((*S*)-2,2-dimethyl-3-oxo-1-(*p*-tolyl)cyclopentyl)-1*H*-1,2,3-triazol-1-yl)pentyl)tetrahydro-1*H*-thieno[3,4-*d*]imidazol-2(3*H*)-one (6)**<sup>[1]</sup>. A mixture of **2h** (27 mg, 0.12 mmol), **5** (25.5 mg, 0.1 mmol), Cu(MeCN)<sub>4</sub>PF<sub>6</sub> (7.5 mg, 0.02 mmol) and DIPEA (10  $\mu$ L, 0.06 mmol) in CH<sub>2</sub>Cl<sub>2</sub> (0.5 mL) was stirred at the room temperature overnight and then concentrated in vacuo. The crude residue was purified by flash column

chromatography on silica gel (CH<sub>2</sub>Cl<sub>2</sub>/MeOH = 10 : 1, R<sub>f</sub> = 0.12) to yield **6** (40.0 mg, 83%) as a white solid. <sup>1</sup>H NMR (600 MHz, CDCl<sub>3</sub>) δ 7.27 (d, *J* = 7.7 Hz, 2H), 7.18 (d, *J* = 7.8 Hz, 2H), 6.75 (s, 1H), 6.00 (s, 1H), 5.27 (s, 1H), 4.50–4.48 (m, 1H), 4.29–4.27 (m, 1H), 4.24–4.16 (m, 2H), 3.14–3.09 (m, 1H), 2.93–2.87 (m, 2H), 2.80–2.71 (m, 2H), 2.56–2.51 (m, 1H), 2.38–2.34 (m, 4H), 1.87–1.79 (m, 2H), 1.72–1.66 (m, 1H), 1.64–1.57 (m, 1H), 1.44–1.38 (m, 2H), 1.35–1.28 (m, 2H), 1.17 (s, 3H), 0.81 (s, 3H) ppm. <sup>13</sup>C NMR (150 MHz, CDCl<sub>3</sub>) δ 221.3, 154.6, 140.1, 136.8, 129.9, 129.2, 127.7, 122.2, 62.2, 60.3, 55.7, 53.8, 53.0, 50.2, 40.7, 34.0, 31.0, 30.0, 28.6, 28.5, 26.6, 22.2, 21.1, 20.6 ppm. IR (KBr): ν<sub>max</sub> = 3250, 2926, 2858, 1737, 1702, 1462, 1265, 735 cm<sup>-1</sup>. HRMS (ESI) (*m/z*): Calcd for C<sub>26</sub>H<sub>35</sub>N<sub>5</sub>O<sub>2</sub>S, [M+Na]<sup>+</sup>, 504.2404; found: 504.2442. [α]<sub>D</sub><sup>25</sup>: -21.7 (*c* 0.13, CHCl<sub>3</sub>). m.p.: 76.4–78.2 °C. HPLC (Chiral pak AD-H, *i*-PrOH/*n*-hexane = 25 : 75, flow rate = 1.0 mL/min, wave length = 210 nm): t<sub>R</sub> = 19.073 min (major), t<sub>R</sub> = 24.220 min (minor) (96% *ee*).

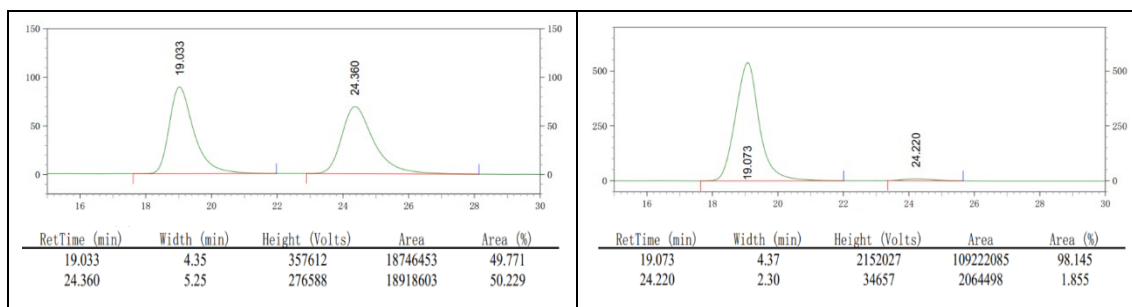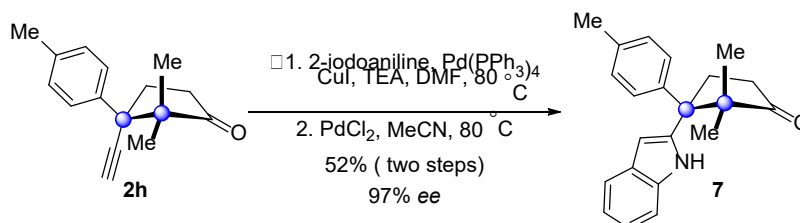

**Preparation of (S)-3-(1H-indol-2-yl)-2,2-dimethyl-3-(p-tolyl)cyclopentan-1-one (7)**<sup>[2]</sup>. To a flame-dried reaction tube was added 2-iodoaniline (26 mg, 0.12 mmol), Pd(PPh<sub>3</sub>)<sub>4</sub> (12 mg, 0.01 mmol), CuI (4 mg, 0.02 mmol), and triethylamine (42 μL, 0.3 mmol) under a nitrogen atmosphere (balloon). Then **2h** (23 mg, 0.1 mmol) in anhydrous DMF (1 mL) was added, and the reaction solution was stirred at 80 °C overnight. When **2h** was fully consumed (monitored by TLC), the reaction was quenched by addition of H<sub>2</sub>O (2 mL). After extraction of the resulted mixture with EtOAc (3 × 3 mL), the combined organic layers were dried over Na<sub>2</sub>SO<sub>4</sub>, filtered, and concentrated in vacuo. The crude product was dissolved in MeCN (1 mL), and PdCl<sub>2</sub> (3.5 mg, 0.02 mmol, 0.2 equiv) was added under a nitrogen atmosphere (balloon). The reaction solution was stirred at 80 °C for 24 h and then concentrated in vacuo. The crude residue was purified by flash column chromatography on silica gel (petroleum ether/EtOAc = 5 : 1, R<sub>f</sub> = 0.62) to yield **7** (16.5 mg, 52%) as a white solid. <sup>1</sup>H NMR (600 MHz, CDCl<sub>3</sub>) δ 7.55 (d,

$J = 7.7$  Hz, 1H), 7.39 (s, 1H), 7.19–7.15 (m, 5H), 7.13–7.07 (m, 2H), 6.34 (s, 1H), 2.71–2.66 (m, 1H), 2.60–2.45 (m, 2H), 2.44–2.40 (m, 1H), 2.38 (s, 3H), 1.27 (s, 3H), 0.98 (s, 3H) ppm.  $^{13}\text{C}$  NMR (150 MHz,  $\text{CDCl}_3$ )  $\delta$  221.1, 141.9, 139.0, 137.3, 135.8, 129.4, 128.5, 128.2, 122.0, 120.4, 120.0, 110.7, 102.5, 55.8, 53.6, 33.5, 30.4, 21.8, 21.1, 20.4 ppm. IR (KBr):  $\nu_{\text{max}} = 2924, 1734, 1457, 1289, 1075, 819, 747$   $\text{cm}^{-1}$ . HRMS (ESI) (m/z): Calcd for  $\text{C}_{22}\text{H}_{23}\text{NO}$ ,  $[\text{M}+\text{Na}]^+$ , 340.1672; found: 340.1676.  $[\alpha]_{\text{D}}^{25}$ :  $-41$  ( $c$  0.10,  $\text{CHCl}_3$ ). m.p.: 246.7–249.3 °C. HPLC (Chiral pak AD-H, *i*-PrOH/*n*-hexane = 1 : 99, flow rate = 1.0 mL/min, wave length = 210 nm):  $t_{\text{R}} = 26.559$  min (minor),  $t_{\text{R}} = 29.279$  min (major) (97% *ee*).

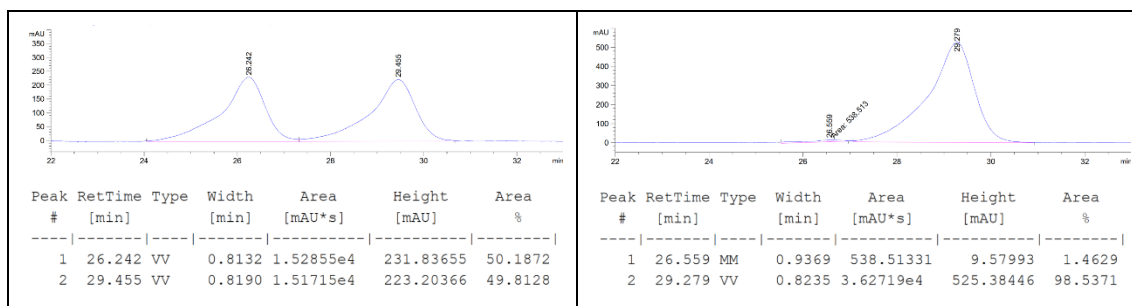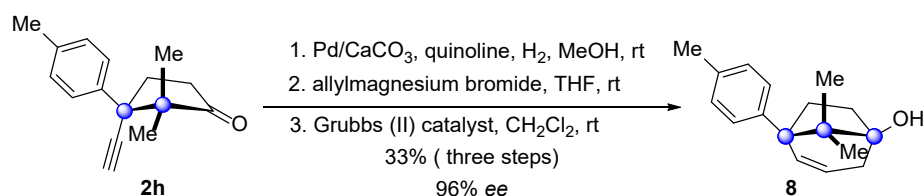

**Preparation of (1*S*,5*S*)-8,8-dimethyl-5-(*p*-tolyl)bicyclo[3.2.1]oct-3-en-1-ol (8).** A mixture of **2h** (22.6 mg, 0.1 mmol), 10% Pd/CaCO<sub>3</sub> (10.6 mg, 0.01 mmol), and quinoline (2.6 mg, 0.02 mmol) in MeOH (1 mL) was stirred at the room temperature for 3 h under an atmosphere of H<sub>2</sub> (balloon). The reaction mixture was filtered through a pad of celite, and the filtrate was concentrated in vacuo. The crude residue was purified by flash column chromatography on silica gel (petroleum ether/EtOAc = 10 : 1,  $R_f = 0.68$ ) to yield a colorless oil. A solution of the obtained oil (21.9 mg, 0.096 mmol) in anhydrous THF (1 mL) was added with allyl magnesium bromide (0.48 mL, 1 M in THF, 0.5 mmol) at 0 °C. The reaction mixture was stirred 3 h at the room temperature, and then was quenched with a saturated aqueous solution of NH<sub>4</sub>Cl (2 mL). The resulting mixture was extracted with EtOAc (3 × 3 mL), and the combined organic phase was washed with brine (1 × 3 mL), dried over Na<sub>2</sub>SO<sub>4</sub>, filtered, and concentrated in vacuo. The crude residue was purified by flash column chromatography on silica gel (petroleum ether/EtOAc = 10 : 1,  $R_f = 0.70$ ) to obtain a pair of inseparable diastereoisomer (*dr* = 1 : 1) as a colorless oil. A mixture of the resulting oil (22 mg, 0.081 mmol) and Grubbs II catalyst (6.9 mg, 0.0081 mmol) in CH<sub>2</sub>Cl<sub>2</sub> (2 mL) was stirred at room temperature for 4 h under a nitrogen atmosphere (balloon) and then concentrated in vacuo. The crude residue was purified by flash column chromatography on silica gel (petroleum ether/EtOAc = 5 : 1,  $R_f = 0.34$ )



to yield **8** (8.0 mg, 33% yield) as a white solid.  $^1\text{H NMR}$  (600 MHz,  $\text{CDCl}_3$ )  $\delta$  7.18–7.13 (m, 4H), 5.80 (d,  $J = 9.7$  Hz, 1H), 5.62–5.60 (m, 1H), 2.68–2.63 (m, 1H), 2.46 (d,  $J = 16.9$  Hz, 1H), 2.34 (s, 3H), 2.23 (d,  $J = 16.9$  Hz, 1H), 2.02–1.93 (m, 2H), 1.80–1.75 (m, 1H), 1.38 (s, 1H), 0.87 (s, 3H), 0.74 (s, 3H) ppm.  $^{13}\text{C NMR}$  (150 MHz,  $\text{CDCl}_3$ )  $\delta$  139.8, 139.3, 135.8, 128.5, 128.0, 123.8, 81.6, 55.1, 46.7, 41.6, 36.6, 33.4, 21.1, 18.5, 17.1 ppm. IR (KBr):  $\nu_{\text{max}} = 3329, 3025, 2923, 1512, 1267, 1040, 744 \text{ cm}^{-1}$ . HRMS (APCI) (m/z): Calcd for  $\text{C}_{17}\text{H}_{22}\text{O}$ ,  $[\text{M}+\text{H}]^+$ , 243.1743; found: 243.1745.  $[\alpha]_{\text{D}}^{25}$ :  $-23$  ( $c$  0.08,  $\text{CHCl}_3$ ). m.p.: 110.2–111.4 °C. HPLC (Chiral pak AS-H, *i*-PrOH/*n*-hexane = 3 : 97, flow rate = 1.0 mL/min, wave length = 210 nm):  $t_{\text{R}} = 6.977$  min (major),  $t_{\text{R}} = 9.130$  min (minor) (96% *ee*).

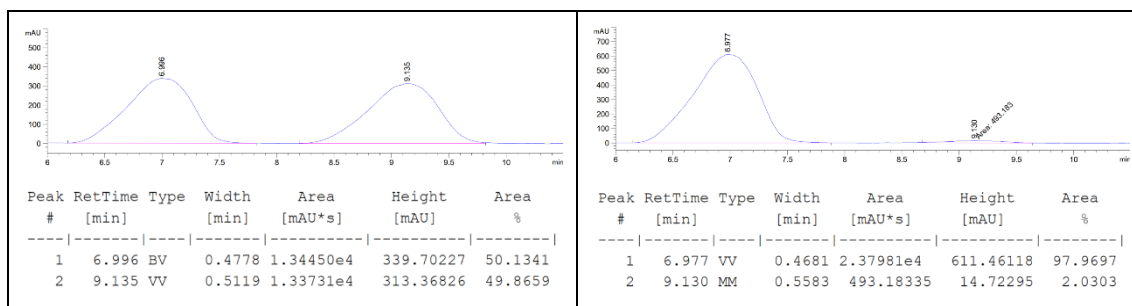

## 5. Mechanism Studies

### 5.1 Reaction of 1ah

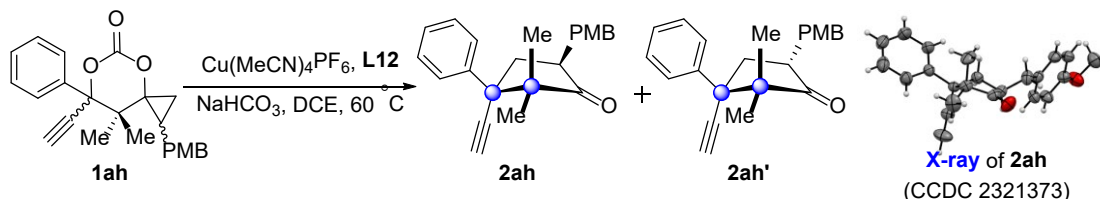

A mixture of  $\text{Cu}(\text{MeCN})_4\text{PF}_6$  (3.7 mg, 0.01 mmol, 10 mol%) and **L12** (4.9 mg, 0.012 mmol, 10 mol%) in DCE (4 mL) in an oven-dried glass tube was stirred at room temperature for 30 min under a nitrogen atmosphere (balloon). Then **1ah** (37.6 mg, 0.1 mmol) and  $\text{NaHCO}_3$  (8.4 mg, 0.1 mmol, 1 equiv) was added. The resulting mixture was stirred at 60 °C until **1ah** was fully consumed as indicated by the TLC analysis (48 h). The reaction mixture was concentrated in vacuo, and the resulted crude product was purified by flash column chromatography on silica gel (petroleum ether/EtOAc = 10 : 1,  $R_f = 0.34$ ) to afford a pair of inseparable diastereomer of **2ah** and **2ah'** (27.3 mg, 82% yield, *dr* = 1 : 1) as a colorless oil. The colorless crystal of **2ah** (preparation through preparative TLC) for X-ray crystallographic analysis was obtained by slow diffusion of *n*-hexane to a solution of **2ah** in EtOAc. Characterization data of the mixture of **2ah/2ah'**:  $^1\text{H NMR}$  (600 MHz,  $\text{CDCl}_3$ )  $\delta$  7.44–7.38 (m, 4H), 7.35–7.32 (m, 4H), 7.30–7.27 (m, 2H), 7.15 (d,  $J = 8.4$  Hz, 2H), 6.98 (d,  $J = 8.4$  Hz, 2H), 6.85 (d,  $J = 8.4$  Hz, 2H), 6.78 (d,  $J = 8.5$  Hz, 2H), 3.79 (s, 3H), 3.77 (s, 3H), 3.16–3.09 (m, 2H), 3.07–3.01 (m, 1H), 2.86 (dd,  $J = 13.7, 7.8$  Hz, 1H), 2.74

(dd,  $J = 13.7, 3.5$  Hz, 1H), 2.68 (s, 1H), 2.54 (dd,  $J = 19.8, 9.8$  Hz, 1H), 2.48 (t,  $J = 11.9$  Hz, 1H), 2.37–2.34 (m, 2H), 2.27 (dd,  $J = 19.9, 11.0$  Hz, 1H), 1.70–1.66 (m, 1H), 1.36 (s, 3H), 1.30 (s, 3H), 0.91 (s, 3H), 0.30 (s, 3H) ppm.  $^{13}\text{C}$  NMR (150 MHz,  $\text{CDCl}_3$ )  $\delta$  220.4, 220.2, 158.3, 158.2, 138.8, 137.9, 132.5, 131.3, 130.4, 129.7, 128.34, 128.27, 127.52, 127.5, 127.3, 113.99, 113.96, 88.0, 85.2, 75.6, 73.3, 56.3, 55.5, 55.4, 55.4, 54.4, 50.0, 48.5, 47.0, 40.2, 37.2, 35.4, 35.1, 25.5, 20.4, 20.3, 19.1 ppm. IR (KBr):  $\nu_{\text{max}} = 3286, 2924, 2853, 1737, 1512, 1246, 1035, 701$   $\text{cm}^{-1}$ . HRMS (ESI) (m/z): Calcd for  $\text{C}_{23}\text{H}_{24}\text{O}_2$ ,  $[\text{M}+\text{Na}]^+$ , 355.1669; found: 355.1673. HPLC (Chiral pak AS-H, *i*-PrOH/*n*-hexane = 2 : 98, flow rate = 1.0 mL/min, wave length = 210 nm):  $t_{\text{R}} = 7.896$  min (minor),  $t_{\text{R}} = 12.354$  min (major) ( $\sim 75\%$  ee,  $\sim 1 : 1$  dr).

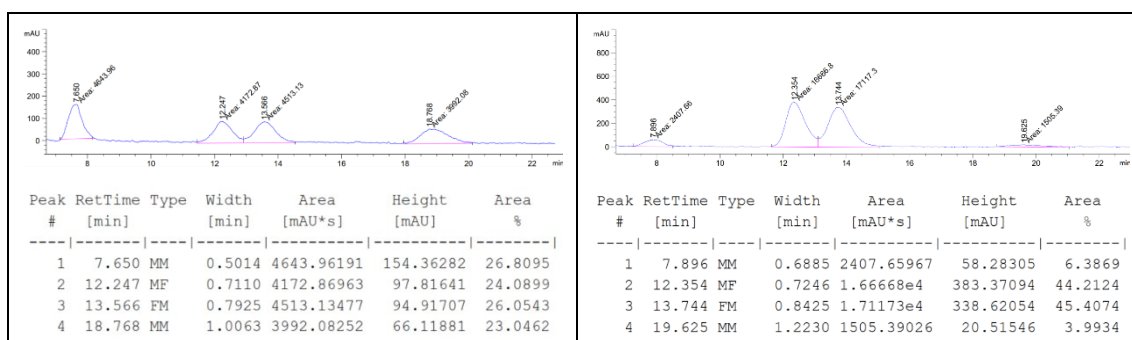

## 5.2 Free radical capture experiments

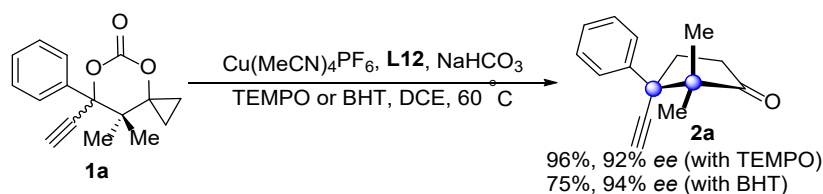

A mixture of  $\text{Cu}(\text{MeCN})_4\text{PF}_6$  (3.7 mg, 0.01 mmol, 10 mol%) and **L12** (4.9 mg, 0.012 mmol, 12 mol%) in anhydrous DCE (4 mL) in an oven-dried glass tube was stirred at room temperature for 30 min under a nitrogen atmosphere (balloon). **1a** (25.6 mg, 0.1 mmol),  $\text{NaHCO}_3$  (8.4 mg, 0.1 mmol, 1 equiv), and TEMPO (31.3 mg, 0.2 mmol, 2 equiv) or BHT (44.1 mg, 0.2 mmol, 2 equiv) were then added. The mixture was stirred at 60  $^\circ\text{C}$  until **1a** was fully consumed as monitored by the TLC analysis ( $\sim 48$  h). The reaction mixture was concentrated in vacuo, and the crude product was purified by flash column chromatography on silica gel (petroleum ether/EtOAc = 10 : 1) to afford **2a** (TEMPO: 20.4 mg, 96% yield, 92% ee; BHT: 15.9 mg, 75% yield, 94% ee).

## 5.3 Non-linear effect experiments

A mixture of  $\text{Cu}(\text{MeCN})_4\text{PF}_6$  (3.7 mg, 0.01 mmol, 10 mol%) and **L12** (4.9 mg, 0.012 mmol, 12 mol%) with different optical purities in anhydrous DCE (4 mL) in an oven-dried glass tube was stirred at room temperature for

30 min under a nitrogen atmosphere (balloon). **1a** (25.6 mg, 0.1 mmol) and NaHCO<sub>3</sub> (8.4 mg, 0.1 mmol, 1 equiv) were then added. The resulting mixture was stirred at 60 °C until **1a** was fully consumed as monitored by the TLC analysis (48 h). The reaction mixture was concentrated in vacuo, and the crude product was purified by flash column chromatography on silica gel (petroleum ether/EtOAc = 10 : 1) to afford **2a** with different optical purities.

**Table S5.** Relationship between *ee* values of **L12** and *ee* values of **2a**<sup>a</sup>

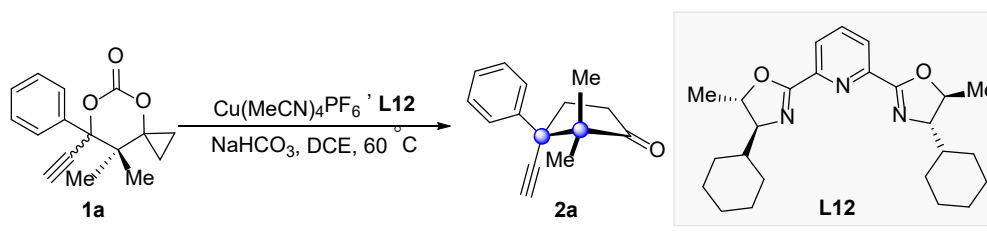

| entry | <i>ee</i> of <b>L12</b> (%) <sup>b</sup> | yield (%) <sup>c</sup> | <i>ee</i> of <b>2a</b> (%) <sup>d</sup> |
|-------|------------------------------------------|------------------------|-----------------------------------------|
| 1     | 2.5                                      | 97                     | 5.3                                     |
| 2     | 14                                       | 95                     | 16                                      |
| 3     | 25                                       | 95                     | 27.5                                    |
| 4     | 38                                       | 96                     | 43                                      |
| 5     | 57                                       | 98                     | 64                                      |
| 6     | 74                                       | 95                     | 79                                      |
| 7     | 86                                       | 96                     | 88                                      |
| 8     | 100                                      | 95                     | 95                                      |

[a] Conditions: **1a** (0.1 mmol), Cu(CH<sub>3</sub>CN)<sub>4</sub>PF<sub>6</sub> (10 mol %), **L12** (12 mol %), NaHCO<sub>3</sub> (1 equiv), DCE (4 mL), 60 °C, 48 h;

[b] Enantiomeric excesses of **L12** (mixture of **L12** and *ent*-**L12** in different ratios) were determined by chiral HPLC analysis;

[c] Isolated yields of **2a**; [d] Enantiomeric excesses of **2a** were determined by chiral HPLC analysis.

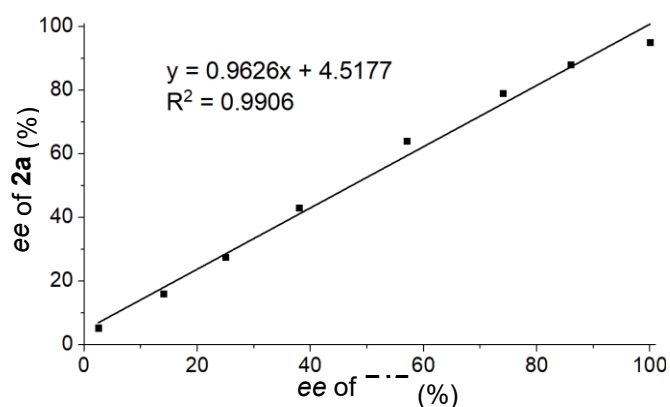

**Figure S1.** Relationship between *ee* values of **L12** and *ee* values of **2a**.

## 6. Preparation and Characterization Data of Ligands

Ligands **L1**–**L10** were purchased from commercial suppliers and used without further purification unless otherwise noted. Ligand **L11** were prepared according to the literature procedures<sup>[3]</sup>.

General procedure for the synthesis of Cy-PyBox ligands **L12–L15** was as follows:

## 6.1 Preparation of **15**

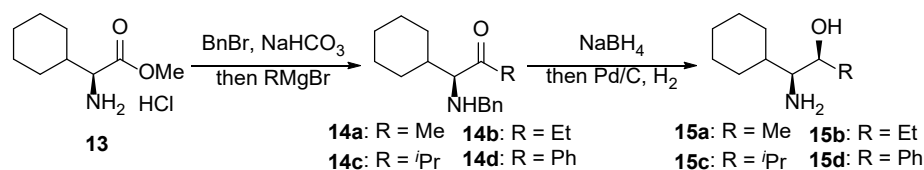

To a 50 mL round-bottom flask was added **13** (415 mg, 2 mmol), NaHCO<sub>3</sub> (370 mg, 4.4 mmol), MeCN (20 mL), and BnBr (0.29 mL, 2.4 mmol). The resulting mixture was stirred at 80 °C for 4 h and filtered through a pad of silica gel. The filtrate was concentrated, and the residue was used next step without further purification. To a solution of the crude product (1 equiv) in dry THF (0.1 M) was added RMgBr (1.5 equiv) dropwise at –20 °C. The reaction mixture was stirred at –20 °C for 6 h and then quenched with a saturated aqueous solution of NH<sub>4</sub>Cl. The resulting mixture was extracted with EtOAc, and the combined organic phase was washed with brine, dried over Na<sub>2</sub>SO<sub>4</sub>, filtered, and concentrated in vacuo. The crude product was purified by column chromatography on silica gel to afford **14** (**14a**, 79% yield; **14b**, 81% yield; **14c**, 70% yield; **14d**, 68% yield).

To a solution of **14** (1 equiv) in MeOH (0.1 M) was added NaBH<sub>4</sub> (2 equiv) at –40 °C. The mixture was stirred at 0 °C for 8 h and then quenched with water. The resulting mixture was extracted with EtOAc. The combined organic phase was washed with brine, dried over Na<sub>2</sub>SO<sub>4</sub>, filtered, and concentrated in vacuo. The crude product was purified by column chromatography on silica gel to afford alcohol<sup>[4]</sup>. A mixture of alcohol (1 equiv) and 10% Pd/C (0.1 equiv) in MeOH (0.1 M) was stirred at 50 °C for 4 h under an atmosphere of H<sub>2</sub> (balloon). The reaction mixture was then filtered through a pad of celite. The filtrate was concentrated in vacuo and the resulted crude residue was purified by flash column chromatography on silica gel to afford **15** (**15a**, 70% yield; **15b**, 56% yield; **15c**, 72% yield; **15d**, 77% yield).

## 6.2 Characterization data of **15**

### (1*S*,2*S*)-1-amino-1-cyclohexylpropan-2-ol (**15a**)

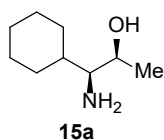

Purification by flash column chromatography on silica gel (CH<sub>2</sub>Cl<sub>2</sub>/MeOH = 10 : 1, R<sub>f</sub> = 0.10) afforded **15a** as a white solid. <sup>1</sup>H NMR (400 MHz, CDCl<sub>3</sub>) δ 3.70–3.64 (m, 1H), 3.21 (s, 3H), 2.41 (s, 1H), 1.77 (d, *J* = 12.0 Hz, 2H),

1.63 (dd,  $J = 26.9, 12.1$  Hz, 3H), 1.47 (d,  $J = 12.0$  Hz, 1H), 1.34–0.99 (m, 9H) ppm.  $^{13}\text{C}$  NMR (100 MHz,  $\text{CDCl}_3$ )  $\delta$  67.1, 62.6, 39.3, 31.1, 26.6, 26.5, 26.4, 26.3, 20.4 ppm. IR (KBr):  $\nu_{\text{max}} = 3370, 2962, 2923, 2850, 1259, 1087, 796$   $\text{cm}^{-1}$ . HRMS (ESI) ( $m/z$ ): Calcd for  $\text{C}_9\text{H}_{19}\text{NO}$ ,  $[\text{M}+\text{H}]^+$ , 158.1539; found: 158.1556.  $[\alpha]_{\text{D}}^{25}$ :  $-10.2$  ( $c$  0.1,  $\text{CHCl}_3$ ). m.p.: 97.4–99.6 °C.

#### (1*S*,2*S*)-1-amino-1-cyclohexylbutan-2-ol (15b)

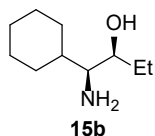

Purification by flash column chromatography on silica gel ( $\text{CH}_2\text{Cl}_2/\text{MeOH} = 10 : 1$ ,  $R_f = 0.11$ ) afforded **15b** as a white solid.  $^1\text{H}$  NMR (400 MHz,  $\text{CDCl}_3$ )  $\delta$  3.51 (d,  $J = 9.6$  Hz, 1H), 2.46 (dd,  $J = 7.7, 4.9$  Hz, 1H), 1.93 (d,  $J = 12.6$  Hz, 1H), 1.76–1.60 (m, 4H), 1.48–1.39 (m, 1H), 1.26–1.18 (m, 4H), 1.06–0.94 (m, 6H) ppm.  $^{13}\text{C}$  NMR (100 MHz,  $\text{CDCl}_3$ )  $\delta$  72.7, 60.6, 41.1, 30.1, 29.8, 26.6, 26.3, 26.2, 23.3, 10.8 ppm. IR (KBr):  $\nu_{\text{max}} = 3387, 2924, 2853, 1452, 970$   $\text{cm}^{-1}$ . HRMS (ESI) ( $m/z$ ): Calcd for  $\text{C}_{10}\text{H}_{21}\text{NO}$ ,  $[\text{M}+\text{H}]^+$ , 172.1696; found: 172.1707.  $[\alpha]_{\text{D}}^{25}$ :  $-10.5$  ( $c$  0.09,  $\text{CHCl}_3$ ). m.p.: 71.3–73.5 °C.

#### (1*S*,2*S*)-1-amino-1-cyclohexyl-3-methylbutan-2-ol (15c)

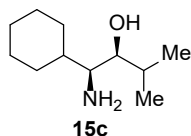

Purification by flash column chromatography on silica gel ( $\text{CH}_2\text{Cl}_2/\text{MeOH} = 10 : 1$ ,  $R_f = 0.13$ ) afforded **15c** as a white solid.  $^1\text{H}$  NMR (400 MHz,  $\text{CDCl}_3$ )  $\delta$  3.31 (dd,  $J = 6.7, 4.4$  Hz, 1H), 2.57 (dd,  $J = 6.7, 4.2$  Hz, 1H), 1.86–1.73 (m, 4H), 1.69–1.50 (m, 4H), 1.27–1.09 (m, 4H), 0.94 (d,  $J = 6.9$  Hz, 3H), 0.89 (d,  $J = 6.8$  Hz, 3H) ppm.  $^{13}\text{C}$  NMR (100 MHz,  $\text{CDCl}_3$ )  $\delta$  76.7, 58.2, 39.1, 31.4, 29.2, 27.2, 26.8, 26.7, 26.4, 20.5, 16.5 ppm. IR (KBr):  $\nu_{\text{max}} = 3382, 2924, 2851, 1449, 893$   $\text{cm}^{-1}$ . HRMS (ESI) ( $m/z$ ): Calcd for  $\text{C}_{11}\text{H}_{23}\text{NO}$ ,  $[\text{M}+\text{H}]^+$ , 186.1852; found: 186.1889.  $[\alpha]_{\text{D}}^{25}$ :  $-15.1$  ( $c$  0.08,  $\text{CHCl}_3$ ). m.p.: 90.3–92.8 °C.

#### (1*S*,2*S*)-2-amino-2-cyclohexyl-1-phenylethan-1-ol (15d)

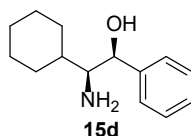

Purification by flash column chromatography on silica gel ( $\text{CH}_2\text{Cl}_2/\text{MeOH} = 10 : 1$ ,  $R_f = 0.13$ ) afforded **15d** as a

white solid.  $^1\text{H NMR}$  (400 MHz,  $\text{CDCl}_3$ )  $\delta$  7.38–7.27 (m, 5H), 4.72 (d,  $J = 5.3$  Hz, 1H), 2.79 (t,  $J = 5.3$  Hz, 1H), 2.38 (s, 3H), 1.77–1.71 (m, 4H), 1.34–0.95 (m, 7H) ppm.  $^{13}\text{C NMR}$  (100 MHz,  $\text{CDCl}_3$ )  $\delta$  141.8, 128.4, 127.7, 127.0, 74.1, 61.4, 39.2, 31.2, 27.9, 26.6, 26.3, 26.2 ppm. **IR** (KBr):  $\nu_{\text{max}} = 3333, 2923, 2850, 1265, 1043, 699$   $\text{cm}^{-1}$ . **HRMS** (ESI) ( $m/z$ ): Calcd for  $\text{C}_{14}\text{H}_{21}\text{NO}$ ,  $[\text{M}+\text{H}]^+$ , 220.1696; found: 220.1721.  $[\alpha]_{\text{D}}^{25}$ :  $-9.1$  ( $c$  0.1, MeOH). **m.p.**: 134.4–136.8  $^{\circ}\text{C}$ .

### 6.3 Preparation of L12–L15

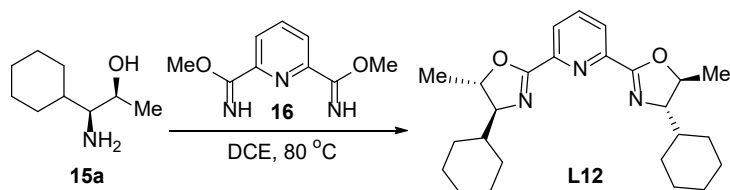

A mixture of **15a** (157 mg, 1 mmol) and **16** (97 mg, 0.5 mmol) in anhydrous DCE (5 mL) was stirred at 80  $^{\circ}\text{C}$  for 12 h. The reaction solution was then concentrated in vacuo and the crude residue was purified by flash column chromatography on silica gel to afford **L12** (75% yield) as a white solid<sup>[5]</sup>.

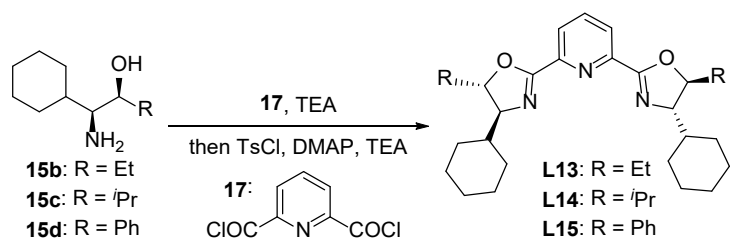

To a solution of **15** (1 mmol) and TEA (0.35 mL, 2.5 mmol) in  $\text{CH}_2\text{Cl}_2$  (5 mL) was added a solution of **17** (204 mg, 0.5 mmol) in  $\text{CH}_2\text{Cl}_2$  (1 mL) dropwise at 0  $^{\circ}\text{C}$ . The reaction mixture was stirred at room temperature for 8 h and then concentrated under a reduced pressure. The crude residue was purified by flash column chromatography on silica gel to afford amide. To a solution of amide (1 equiv), DMAP (5 equiv), and TEA (5 equiv) in  $\text{CH}_2\text{Cl}_2$  (0.1 M) was added a solution of TsCl (1 equiv) in  $\text{CH}_2\text{Cl}_2$  dropwise at 0  $^{\circ}\text{C}$ . The reaction mixture was stirred at room temperature for 12 h and then concentrated under a reduced pressure. The crude residue was purified by flash column chromatography on silica gel to afford **L13**, **L14**, or **L15** as a white solid (**L13**, 62% yield; **L14**, 50% yield; **L15**, 68% yield)<sup>[6]</sup>.

### 6.4 Characterization data of L12–L15

#### 2,6-bis((4*S*,5*S*)-4-cyclohexyl-5-methyl-4,5-dihydrooxazol-2-yl)pyridine (**L12**)

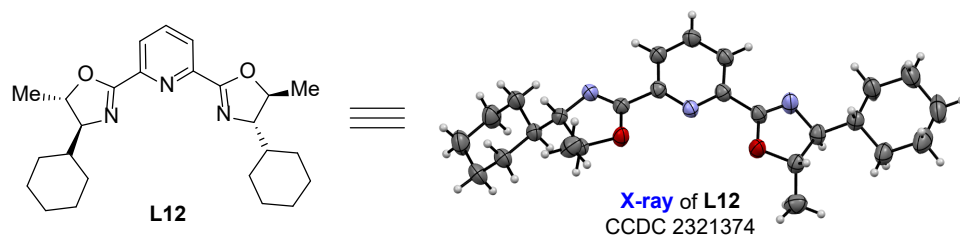

Purification by flash column chromatography on silica gel (petroleum ether/EtOAc = 1 : 1,  $R_f$  = 0.41) afforded **L12** as a white solid. The colorless crystal of **L12** for X-ray crystallographic analysis was obtained by slow diffusion of *n*-hexane to a solution of **L12** in  $\text{CH}_2\text{Cl}_2$ .  **$^1\text{H NMR}$**  (600 MHz,  $\text{CDCl}_3$ )  $\delta$  8.13 (d,  $J$  = 7.8 Hz, 2H), 7.82 (t,  $J$  = 7.9 Hz, 1H), 4.64–4.60 (m, 2H), 3.62 (t,  $J$  = 7.2 Hz, 2H), 1.98 (d,  $J$  = 13.0 Hz, 2H), 1.78–1.74 (m, 4H), 1.69–1.64 (m, 4H), 1.55–1.48 (m, 2H), 1.44 (d,  $J$  = 6.2 Hz, 6H), 1.27–1.16 (m, 6H), 1.11–1.03 (m, 4H) ppm.  **$^{13}\text{C NMR}$**  (150 MHz,  $\text{CDCl}_3$ )  $\delta$  161.4, 147.4, 137.2, 125.7, 80.1, 79.1, 42.6, 29.8, 29.0, 26.7, 26.2, 22.0 ppm. **IR** (KBr):  $\nu_{\text{max}}$  = 2924, 2852, 1643, 1450, 1264, 744  $\text{cm}^{-1}$ . **HRMS** (ESI) ( $m/z$ ): Calcd for  $\text{C}_{25}\text{H}_{35}\text{N}_3\text{O}_2$ ,  $[\text{M}+\text{H}]^+$ , 410.2802; found: 410.2807.  $[\alpha]_{\text{D}}^{25}$ :  $-91.6$  ( $c$  0.14,  $\text{CHCl}_3$ ). **m.p.**: 161.1–163.7  $^{\circ}\text{C}$ .

#### 2,6-bis((4*S*,5*S*)-4-cyclohexyl-5-ethyl-4,5-dihydrooxazol-2-yl)pyridine (**L13**)

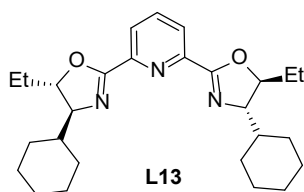

Purification by flash column chromatography on silica gel (petroleum ether/EtOAc = 1 : 1,  $R_f$  = 0.47) afforded **L13** as a white solid.  **$^1\text{H NMR}$**  (600 MHz,  $\text{CDCl}_3$ )  $\delta$  8.09 (d,  $J$  = 7.8 Hz, 2H), 7.83 (t,  $J$  = 7.8 Hz, 1H), 4.45 (q,  $J$  = 6.4 Hz, 2H), 3.71 (t,  $J$  = 6.7 Hz, 2H), 1.96 (d,  $J$  = 13.0 Hz, 2H), 1.78–1.73 (m, 6H), 1.69–1.65 (m, 6H), 1.53–1.47 (m, 2H), 1.27–1.17 (m, 6H), 1.11–1.05 (m, 4H), 1.03 (t,  $J$  = 7.4 Hz, 6H) ppm.  **$^{13}\text{C NMR}$**  (150 MHz,  $\text{CDCl}_3$ )  $\delta$  161.4, 147.4, 137.2, 125.6, 84.8, 76.7, 42.7, 29.6, 29.1, 28.9, 26.6, 26.3, 26.2, 9.6 ppm. **IR** (KBr):  $\nu_{\text{max}}$  = 2925, 2852, 1664, 1453, 1261, 941, 745  $\text{cm}^{-1}$ . **HRMS** (ESI) ( $m/z$ ): Calcd for  $\text{C}_{27}\text{H}_{39}\text{N}_3\text{O}_2$ ,  $[\text{M}+\text{H}]^+$ , 438.3115; found: 438.1120.  $[\alpha]_{\text{D}}^{25}$ :  $-103$  ( $c$  0.06,  $\text{CHCl}_3$ ). **m.p.**: 79.3–81.7  $^{\circ}\text{C}$ .

#### 2,6-bis((4*S*,5*S*)-4-cyclohexyl-5-isopropyl-4,5-dihydrooxazol-2-yl)pyridine (**L14**)

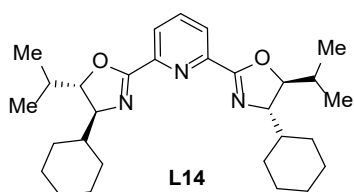

Purification by flash column chromatography on silica gel (petroleum ether/EtOAc = 1 : 1,  $R_f$  = 0.48) afforded **L14**

as a white solid.  $^1\text{H NMR}$  (600 MHz,  $\text{CDCl}_3$ )  $\delta$  8.09 (d,  $J = 7.8$  Hz, 2H), 7.85 (t,  $J = 7.8$  Hz, 1H), 4.40 (t,  $J = 8.1$  Hz, 2H), 4.01 (dd,  $J = 8.8, 5.0$  Hz, 2H), 2.36 (s, 4H), 2.16–2.13 (m, 2H), 1.94 (d,  $J = 13.2$  Hz, 2H), 1.77 (d,  $J = 13.0$  Hz, 2H), 1.70–1.68 (m, 4H), 1.64 (d,  $J = 12.6$  Hz, 2H), 1.47–1.40 (m, 2H), 1.32–1.22 (m, 4H), 1.20–1.14 (m, 2H), 1.10 (d,  $J = 6.4$  Hz, 6H), 1.06 (d,  $J = 6.6$  Hz, 6H) ppm.  $^{13}\text{C NMR}$  (150 MHz,  $\text{CDCl}_3$ )  $\delta$  162.7, 147.3, 137.4, 125.4, 89.6, 72.8, 38.2, 32.3, 29.1, 27.9, 26.8, 26.4, 26.1, 20.8, 19.5 ppm. **IR** (KBr):  $\nu_{\text{max}} = 2963, 2924, 2852, 1666, 1450, 1342, 938, 745$   $\text{cm}^{-1}$ . **HRMS** (ESI) ( $m/z$ ): Calcd for  $\text{C}_{29}\text{H}_{43}\text{N}_3\text{O}_2$ ,  $[\text{M}+\text{H}]^+$ , 466.3428; found: 466.3425.  $[\alpha]_{\text{D}}^{25}$ :  $-95.8$  ( $c$  0.08,  $\text{CHCl}_3$ ). **m.p.**: 213.7–215.2  $^{\circ}\text{C}$ .

## 2,6-bis((4*S*,5*S*)-4-cyclohexyl-5-phenyl-4,5-dihydrooxazol-2-yl)pyridine (**L15**)

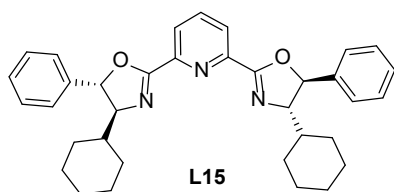

Purification by flash column chromatography on silica gel (petroleum ether/EtOAc = 1 : 1,  $R_f = 0.68$ ) afforded **L15** as a white solid.  $^1\text{H NMR}$  (400 MHz,  $\text{CDCl}_3$ )  $\delta$  8.18 (d,  $J = 7.8$  Hz, 2H), 7.88 (t,  $J = 7.9$  Hz, 1H), 7.37–7.28 (m, 10H), 5.40 (d,  $J = 7.4$  Hz, 2H), 4.10 (t,  $J = 7.0$  Hz, 2H), 2.06–2.00 (m, 2H), 1.80–1.62 (m, 10H), 1.31–1.07 (m, 10H) ppm.  $^{13}\text{C NMR}$  (100 MHz,  $\text{CDCl}_3$ )  $\delta$  161.3, 147.1, 141.1, 137.4, 128.8, 128.4, 126.5, 125.9, 85.0, 80.7, 43.0, 29.6, 29.3, 26.6, 26.2, 26.2 ppm. **IR** (KBr):  $\nu_{\text{max}} = 2925, 2852, 1645, 1452, 1263, 963, 742$   $\text{cm}^{-1}$ . **HRMS** (ESI) ( $m/z$ ): Calcd for  $\text{C}_{35}\text{H}_{39}\text{N}_3\text{O}_2$ ,  $[\text{M}+\text{H}]^+$ , 534.3115; found: 534.3116.  $[\alpha]_{\text{D}}^{25}$ :  $-25$  ( $c$  0.05,  $\text{CHCl}_3$ ). **m.p.**: 263.4–267.9  $^{\circ}\text{C}$ .

## 7. Preparation and Characterization Data of 1

### 7.1 Preparation of 19

Compounds **19a**, **19b**, **19e**, **19f**, **19g**, **19h**, **19i**, **19j**, **19k**, **19m**, **19o**, **19v**, **19w**, **19aa**, **19ac**, **19ak**, **19al** and **19am** were prepared by **Method A**; Compounds **19c**, **19d**, **19l**, **19n**, **19p**, **19q**, **19r**, **19s**, **19t**, **19u**, **19x**, **19y**, **19z**, **19ab**, **19ad**, **19ai** and **19aj** were prepared by **Method B**; Compounds **19ae**, **19af**, and **19ag** were prepared by **Method C**; Compound **19ah** was prepared by **Method D**.



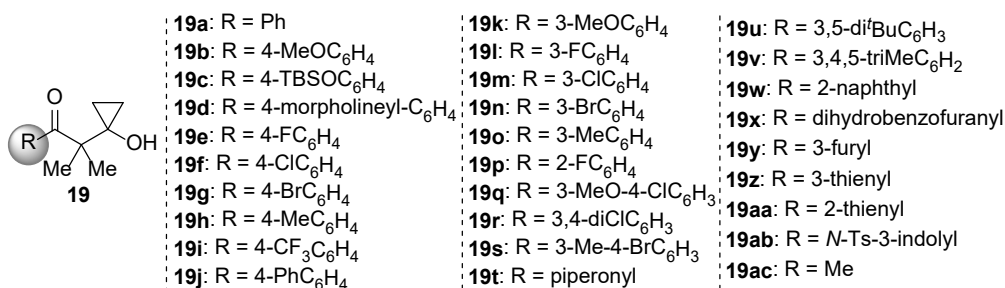

#### Method A:

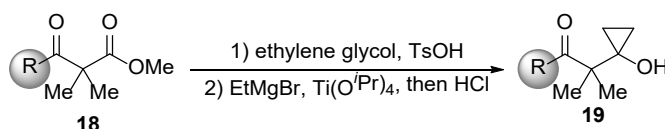

A round-bottomed flask equipped with a Dean-Stark Trap was charged with **18** (compounds **18a**, **18b**, **18e**, **18f**, **18g**, **18h**, **18i**, **18j**, **18k**, **18m**, **18o**, **18v**, **18w**, **18aa**, **18al**, and **18am** were synthesized following the reported procedure<sup>[7]</sup>, compound **18ac** and **18ak** was commercially available) (5 mmol), ethylene glycol (2.8 mL, 50 mmol), and TsOH (86 mg, 0.5 mmol) in toluene (50 mL). The reaction mixture was stirred at 140 °C for 24 h and then quenched with a saturated aqueous solution of NaHCO<sub>3</sub> (20 mL). After separation of the organic phase, the aqueous phase was extracted with EtOAc (2 × 30 mL). The combined organic phase was concentrated in vacuo. The crude product was filtered through a pad of silica gel to afford the protected crude esters. To a solution of the crude esters (1 equiv) and Ti(O<sup>*i*</sup>Pr)<sub>4</sub> (0.4 equiv) in THF (0.1 M) was added EtMgBr (2 equiv) dropwise at 0 °C. The reaction mixture was stirred for an additional 2 h and then quenched with a saturated aqueous solution of NH<sub>4</sub>Cl. The resulting mixture was extracted with EtOAc, and the combined organic phase was washed with brine, dried over Na<sub>2</sub>SO<sub>4</sub>, filtered, and concentrated in vacuo. The crude product was used directly in the next step without further purification. To a solution of the above crude cyclopropanol (1 equiv) in THF (0.1 M) was added a 2 N aqueous HCl solution (50% volume ratio). The resulting mixture was stirred at 60 °C for 8 h and then extracted with EtOAc. The combined organic phase was washed with brine, dried over Na<sub>2</sub>SO<sub>4</sub>, filtered, and concentrated in vacuo. The crude product was purified by column chromatography on silica gel to afford **19** (**19a**, 65% yield; **19b**, 29% yield; **19e**, 45% yield; **19f**, 30% yield; **19g**, 32% yield; **19h**, 39% yield; **19i**, 23% yield; **19j**, 54% yield; **19k**, 27% yield; **19m**, 21% yield; **19o**, 41% yield; **19v**, 30% yield; **19w**, 16% yield; **19aa**, 47% yield; **19ac**, 52% yield; **19ak**, 65% yield; **19al**, 50% yield; **19am**, 58% yield).

#### Method B:

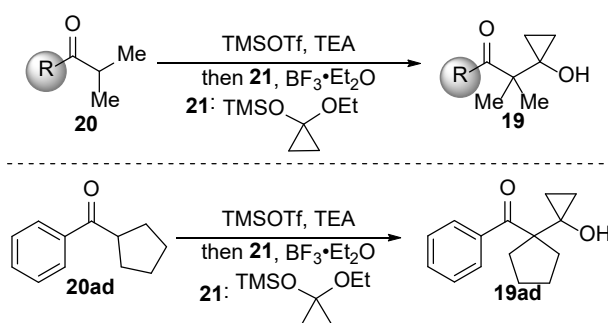

To a solution of **20** (compounds **20c**, **20d**, **20l**, **20n**, **20p**, **20q**, **20r**, **20s**, **20t**, **20u**, **20x**, **20y**, **20z**, **20ab** and **20al** were synthesized following the reported procedure<sup>[8]</sup>, compound **20ad** and **20aj** is commercially available) (2 mmol) and TEA (1.1 mL, 8 mmol) in CH<sub>2</sub>Cl<sub>2</sub> (20 mL) was added TMSOTf (0.54 mL, 3 mmol) dropwise at 0 °C. The reaction mixture was stirred overnight at room temperature before being quenched with a saturated aqueous solution of NaHCO<sub>3</sub> (20 mL). The resulting mixture was extracted with CH<sub>2</sub>Cl<sub>2</sub> (2 × 20 mL), and the combined organic phase was dried over Na<sub>2</sub>SO<sub>4</sub>, filtered, and concentrated in vacuo. The crude product was filtered through a pad of silica gel and then concentrated. To a solution of the crude silyl ether (2 equiv) and **21** (1 equiv) in CH<sub>2</sub>Cl<sub>2</sub> (0.1 M) was added BF<sub>3</sub>·Et<sub>2</sub>O (1.6 equiv) dropwise at -78 °C. The reaction temperature was then elevated to 0 °C after 2 h. The reaction was stirred for additional 2 h at room temperature. The resulting solution was quenched with a saturated aqueous solution of NaHCO<sub>3</sub> and extracted with CH<sub>2</sub>Cl<sub>2</sub>. The combined organic phase was dried over Na<sub>2</sub>SO<sub>4</sub>, filtered, and concentrated in vacuo. The crude product was purified by flash column chromatography on silica gel to afford **19** (**19c**, 62% yield; **19d**, 50% yield; **19l**, 51% yield; **19n**, 42% yield; **19p**, 65% yield; **19q**, 65% yield; **19r**, 32% yield; **19s**, 59% yield; **19t**, 70% yield; **19u**, 77% yield; **19x**, 63% yield; **19y**, 60% yield; **19z**, 65% yield; **19ab**, 62% yield; **19ad**, 56% yield; **19aj**, 75% yield; **19al**, 52% yield).

### Method C:

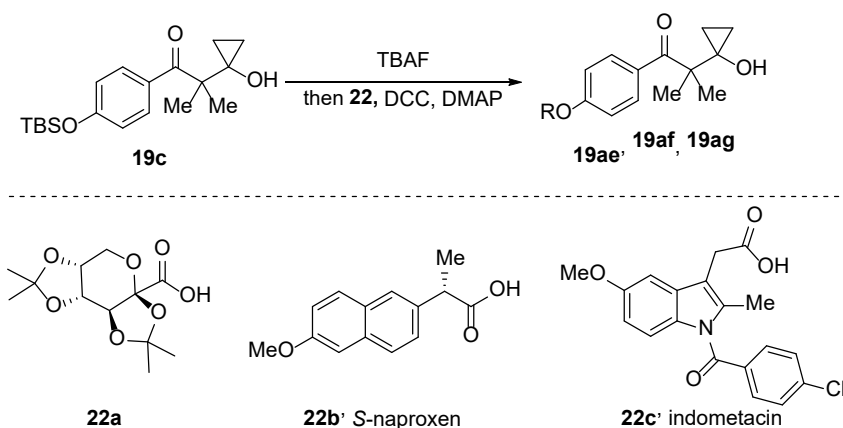

To a solution of **19c** (670 mg, 2 mmol) in dry THF (20 mL) was added TBAF (1 M in THF, 4 mL, 4 mmol) at 0 °C. The reaction mixture was stirred at room temperature for 4 h. Water (15 mL) was then added to quench the reaction.

The resulting mixture was extracted with EtOAc (3 × 20 mL). The combined organic phase was washed with brine (1 × 20 mL), dried over Na<sub>2</sub>SO<sub>4</sub>, filtered, and concentrated in vacuo. The crude product was used directly in the next step without further purification. A mixture of the obtained crude (1 equiv), **22** (1.2 equiv), DCC (1.2 equiv), and DMAP (0.1 equiv) in CH<sub>2</sub>Cl<sub>2</sub> (0.2 M) was stirred at room temperature overnight. Water was then added to quench the reaction. The resulting mixture was extracted with CH<sub>2</sub>Cl<sub>2</sub>. The combined organic phase was dried over Na<sub>2</sub>SO<sub>4</sub>, filtered, and concentrated in vacuo. The crude product was purified by column chromatography on silica gel to afford **19ae–19ag** (**19ae**, 63% yield; **19af**, 84% yield; **19ag**, 85% yield).

#### Method D:

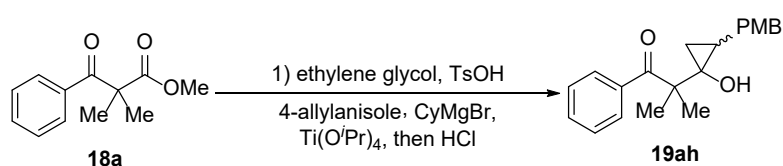

A round-bottomed flask equipped with a Dean-Stark Trap was charged with **18a** (1 g, 5 mmol), ethylene glycol (2.8 mL, 50 mmol), and TsOH (86 mg, 0.5 mmol) in toluene (50 mL). The reaction mixture was stirred at 140 °C for 24 h and then quenched with a saturated aqueous solution of NaHCO<sub>3</sub> (20 mL). After separation of the organic phase, the aqueous phase was extracted with EtOAc (2 × 30 mL). The combined organic phase was concentrated in vacuo. The crude product was filtered through a pad of silica gel and then concentrated. To a solution of the crude esters (1 equiv) and 4-allylanisole (1.5 equiv) in THF (0.1 M) was added Ti(O<sup>i</sup>Pr)<sub>4</sub> (1 equiv) and CyMgBr (4 equiv) successively at 0 °C. The reaction mixture was stirred for an additional 2 h and then quenched with a saturated aqueous solution of NH<sub>4</sub>Cl. The resulting mixture was extracted with EtOAc, and the combined organic phase was washed with brine, dried over Na<sub>2</sub>SO<sub>4</sub>, filtered, and concentrated in vacuo. The crude cyclopropanol was dissolved in THF (0.1 M) and then added with a 2 N aqueous solution of HCl (50% volume ratio). The reaction mixture was stirred at 60 °C for 8 h, and the resulting mixture was extracted with EtOAc. The combined organic phase was washed with brine, dried over Na<sub>2</sub>SO<sub>4</sub>, filtered, and concentrated in vacuo. The crude product was purified by column chromatography on silica gel to afford **19ah** (30% yield) as a colorless oil.

## 7.2 Preparation of **1**

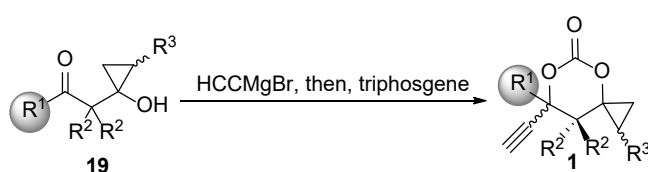

To a solution of **19** (2 mmol) in THF (20 mL) was added ethynylmagnesium bromide (0.5 M in THF, 10 mL, 5 mmol) dropwise at 0 °C. The reaction mixture was stirred 2 h at room temperature before being quenched with a saturated aqueous solution of NH<sub>4</sub>Cl (20 mL). The resulting mixture was extracted with EtOAc (3 × 20 mL). The combined organic phase was washed with brine (2 × 20 mL), dried over Na<sub>2</sub>SO<sub>4</sub>, filtered, and concentrated in vacuo afford the crude propargyl alcohol without further purification. To a solution of the crud propargyl alcohol (1 equiv) and pyridine (5 equiv) in CH<sub>2</sub>Cl<sub>2</sub> (0.05 M) was added a solution of triphosgene (1 equiv) in CH<sub>2</sub>Cl<sub>2</sub> (0.05 M) dropwise at 0 °C. The reaction mixture was stirred for 3 h at room temperature before being quenched with a saturated aqueous solution of NH<sub>4</sub>Cl. The resulting mixture was extracted with CH<sub>2</sub>Cl<sub>2</sub>. The combined organic phase was washed with brine, dried over Na<sub>2</sub>SO<sub>4</sub>, filtered, and concentrated in vacuo. The crude product was purified by column chromatography on silica gel to afford substrates **1** (**1a**, 79% yield; **1b**, 51% yield; **1c**, 66% yield; **1d**, 61% yield; **1e**, 66% yield; **1f**, 54% yield; **1g**, 36% yield; **1h**, 55% yield; **1i**, 66% yield; **1j**, 47% yield; **1k**, 67% yield; **1l**, 45% yield; **1m**, 65% yield; **1n**, 67% yield; **1o**, 31% yield; **1p**, 40% yield; **1q**, 56% yield; **1r**, 83% yield; **1s**, 60% yield; **1t**, 47% yield; **1u**, 53% yield; **1v**, 46% yield; **1w**, 61% yield; **1x**, 35% yield; **1y**, 42% yield; **1z**, 37% yield; **1aa**, 43% yield; **1ab**, 54% yield; **1ac**, 62% yield; **1ad**, 40% yield; **1ae**, 47% yield; **1af**, 57% yield; **1ag**, 52% yield; **1ah**, 65% yield, dr = 1 : 1; **1ai**, 50% yield; **1aj**, 42% yield; **1ak**, 55% yield; **1al**, 62% yield; **1am**, 65% yield).

### 7.3 Characterization data of **19** and **1**

#### 2-(1-hydroxycyclopropyl)-2-methyl-1-phenylpropan-1-one (**19a**)

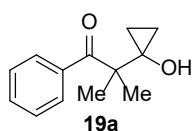

Purification by flash column chromatography on silica gel (petroleum ether/EtOAc = 3 : 1,  $R_f$  = 0.48) afforded **19a** as a white solid. <sup>1</sup>H NMR (400 MHz, CDCl<sub>3</sub>) δ 7.85–7.59 (m, 1H), 7.50–7.44 (m, 1H), 7.42–7.38 (m, 1H), 1.28 (s, 4H), 0.85–0.72 (m, 3H) ppm. <sup>13</sup>C NMR (100 MHz, CDCl<sub>3</sub>) δ 209.9, 139.2, 131.1, 128.3, 127.8, 60.9, 51.5, 23.2, 11.6 ppm. IR (KBr):  $\nu_{\max}$  = 3461, 3058, 2979, 1680, 1617, 1237, 1019, 702 cm<sup>-1</sup>. HRMS (ESI) (m/z): Calcd for C<sub>13</sub>H<sub>16</sub>O<sub>2</sub>, [M+H]<sup>+</sup>, 205.1223; found: 205.1214. m.p.: 46.9–48.0 °C.

#### 7-ethynyl-8,8-dimethyl-7-phenyl-4,6-dioxaspiro[2.5]octan-5-one (**1a**)

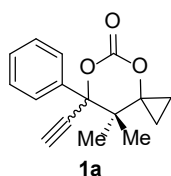

Purification by flash column chromatography on silica gel (petroleum ether/EtOAc = 5 : 1,  $R_f$  = 0.26) afforded **1a** as a white solid.  $^1\text{H NMR}$  (400 MHz,  $\text{CDCl}_3$ )  $\delta$  7.58–7.55 (m, 2H), 7.41–7.37 (m, 3H), 2.89 (s, 1H), 1.32–1.21 (m, 2H), 0.99–0.90 (m, 7H), 0.75–0.69 (m, 1H) ppm.  $^{13}\text{C NMR}$  (100 MHz,  $\text{CDCl}_3$ )  $\delta$  148.4, 136.0, 129.0, 127.8, 127.3, 86.3, 81.1, 78.3, 70.3, 38.0, 19.8, 19.6, 12.2, 7.5 ppm. **IR** (KBr):  $\nu_{\text{max}}$  = 3253, 2984, 2925, 1755, 1270, 1072, 762  $\text{cm}^{-1}$ . **HRMS** (ESI) (m/z): Calcd for  $\text{C}_{16}\text{H}_{16}\text{O}_3$ ,  $[\text{M}+\text{Na}]^+$ , 279.0992; found: 279.0987. **m.p.**: 117.4–119.5  $^\circ\text{C}$ .

### 2-(1-hydroxycyclopropyl)-1-(4-methoxyphenyl)-2-methylpropan-1-one (19b)

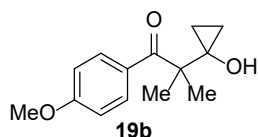

Purification by flash column chromatography on silica gel (petroleum ether/EtOAc = 5 : 1,  $R_f$  = 0.25) afforded **19b** as a white solid.  $^1\text{H NMR}$  (400 MHz,  $\text{CDCl}_3$ )  $\delta$  7.92 (d,  $J$  = 8.9 Hz, 2H), 6.91 (d,  $J$  = 8.9 Hz, 2H), 3.86 (s, 3H), 3.09 (s, 1H), 1.32 (s, 6H), 0.86–0.74 (m, 4H) ppm.  $^{13}\text{C NMR}$  (100 MHz,  $\text{CDCl}_3$ )  $\delta$  206.7, 162.4, 131.0, 130.6, 113.6, 61.3, 55.5, 51.2, 23.6, 11.8 ppm. **IR** (KBr):  $\nu_{\text{max}}$  = 3308, 2979, 1664, 1600, 1506, 1255, 1168, 840  $\text{cm}^{-1}$ . **HRMS** (ESI) (m/z): Calcd for  $\text{C}_{14}\text{H}_{18}\text{O}_3$ ,  $[\text{M}+\text{Na}]^+$ , 257.1148; found: 257.1137. **m.p.**: 60.2–61.0  $^\circ\text{C}$ .

### 7-ethynyl-7-(4-methoxyphenyl)-8,8-dimethyl-4,6-dioxaspiro[2.5]octan-5-one(1b)

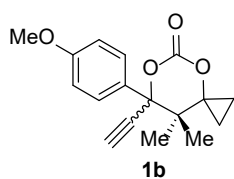

Purification by flash column chromatography on silica gel (petroleum ether/EtOAc = 5 : 1,  $R_f$  = 0.28) afforded **1b** as a white solid.  $^1\text{H NMR}$  (600 MHz,  $\text{CDCl}_3$ )  $\delta$  7.48 (d,  $J$  = 8.9 Hz, 2H), 6.90 (d,  $J$  = 8.9 Hz, 2H), 3.83 (s, 3H), 2.88 (s, 1H), 1.29–1.22 (m, 2H), 0.98–0.94 (m, 4H), 0.88 (s, 3H), 0.76–0.70 (m, 1H) ppm.  $^{13}\text{C NMR}$  (150 MHz,  $\text{CDCl}_3$ )  $\delta$  160.0, 148.5, 128.7, 128.1, 113.1, 86.2, 81.3, 78.1, 70.2, 55.5, 38.2, 19.8, 19.6, 12.2, 7.5 ppm. **IR** (KBr):  $\nu_{\text{max}}$  = 3523, 3290, 1752, 1512, 1255, 1076, 831  $\text{cm}^{-1}$ . **HRMS** (ESI) (m/z): Calcd for  $\text{C}_{17}\text{H}_{18}\text{O}_4$ ,  $[\text{M}+\text{H}]^+$ , 287.1205; found: 287.1278. **m.p.**: 168.3–171.6  $^\circ\text{C}$ .

### 1-(4-((tert-butyl)dimethylsilyloxy)phenyl)-2-(1-hydroxycyclopropyl)-2-methylpropan-1-one (19c)

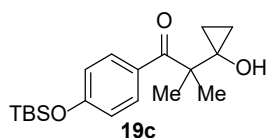

Purification by flash column chromatography on silica gel (petroleum ether/EtOAc = 5 : 1,  $R_f$  = 0.42) afforded **19c** as a light yellow solid.  $^1\text{H NMR}$  (400 MHz,  $\text{CDCl}_3$ )  $\delta$  7.83 (d,  $J$  = 8.3 Hz, 2H), 6.84 (d,  $J$  = 8.3 Hz, 2H), 3.22 (s, 1H), 1.29 (s, 6H), 0.98 (s, 9H), 0.82–0.74 (m, 4H), 0.22 (s, 6H) ppm.  $^{13}\text{C NMR}$  (100 MHz,  $\text{CDCl}_3$ )  $\delta$  206.9, 159.0, 131.2, 130.8, 119.6, 61.1, 51.2, 25.7, 23.5, 18.3, 11.8, –4.3 ppm. **IR** (KBr):  $\nu_{\text{max}}$  = 3310, 2956, 2933, 2860, 1598, 1506, 1262, 913, 843  $\text{cm}^{-1}$ . **HRMS** (ESI) ( $m/z$ ): Calcd for  $\text{C}_{19}\text{H}_{30}\text{O}_3\text{Si}$ ,  $[\text{M}+\text{Na}]^+$ , 357.1856; found: 357.1853. **m.p.**: 59.7–61.4  $^\circ\text{C}$ .

#### 7-(4-((*tert*-butyldimethylsilyloxy)phenyl)-7-ethynyl-8,8-dimethyl-4,6-dioxaspiro[2.5]octan-5-one (1c)

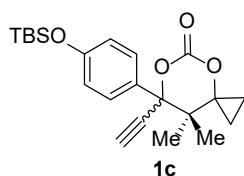

Purification by flash column chromatography on silica gel (petroleum ether/EtOAc = 5 : 1,  $R_f$  = 0.46) afforded **1c** as a light yellow solid.  $^1\text{H NMR}$  (400 MHz,  $\text{CDCl}_3$ )  $\delta$  7.40 (d,  $J$  = 8.7 Hz, 2H), 6.82 (d,  $J$  = 8.7 Hz, 2H), 2.87 (s, 1H), 1.28–1.17 (m, 2H), 0.97–0.89 (m, 13H), 0.86 (s, 3H), 0.73–0.66 (m, 1H) ppm.  $^{13}\text{C NMR}$  (100 MHz,  $\text{CDCl}_3$ )  $\delta$  156.2, 148.4, 128.6, 119.2, 86.2, 81.2, 78.1, 70.2, 38.1, 25.7, 19.8, 19.6, 18.3, 12.1, 7.5, –4.3 ppm. **IR** (KBr):  $\nu_{\text{max}}$  = 3291, 2955, 2859, 1758, 1509, 1263, 914, 839  $\text{cm}^{-1}$ . **HRMS** (ESI) ( $m/z$ ): Calcd for  $\text{C}_{22}\text{H}_{30}\text{O}_4\text{Si}$ ,  $[\text{M}+\text{Na}]^+$ , 409.1806; found: 409.1802. **m.p.**: 136.2–137.4  $^\circ\text{C}$ .

#### 2-(1-hydroxycyclopropyl)-2-methyl-1-(4-morpholinophenyl)propan-1-one (19d)

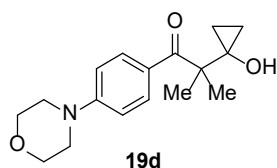

Purification by flash column chromatography on silica gel (petroleum ether/EtOAc = 3 : 1,  $R_f$  = 0.18) afforded **19d** as a light yellow solid.  $^1\text{H NMR}$  (400 MHz,  $\text{CDCl}_3$ )  $\delta$  7.91 (d,  $J$  = 8.5 Hz, 2H), 6.81 (d,  $J$  = 8.6 Hz, 2H), 3.80 (t,  $J$  = 4.9 Hz, 3H), 3.41 (s, 1H), 3.23 (t,  $J$  = 4.9 Hz, 3H), 1.28 (s, 6H), 0.80–0.73 (m, 4H) ppm.  $^{13}\text{C NMR}$  (100 MHz,  $\text{CDCl}_3$ )  $\delta$  205.4, 153.2, 131.0, 127.7, 113.1, 66.5, 61.1, 50.9, 47.5, 23.5, 11.8 ppm. **IR** (KBr):  $\nu_{\text{max}}$  = 3331, 2972, 1553, 1169, 1118, 1020  $\text{cm}^{-1}$ . **HRMS** (ESI) ( $m/z$ ): Calcd for  $\text{C}_{17}\text{H}_{23}\text{NO}_3$ ,  $[\text{M}+\text{H}]^+$ , 290.1750; found: 290.1741. **m.p.**: 80.3–81.4  $^\circ\text{C}$ .

### 7-ethynyl-8,8-dimethyl-7-(4-morpholinophenyl)-4,6-dioxaspiro[2.5]octan-5-one (1d)

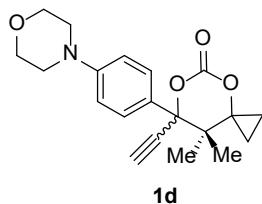

Purification by flash column chromatography on silica gel (petroleum ether/EtOAc = 3 : 1,  $R_f$  = 0.2) afforded **1d** as a white solid.  $^1\text{H NMR}$  (600 MHz,  $\text{CDCl}_3$ )  $\delta$  7.44 (d,  $J$  = 8.4 Hz, 2H), 6.88 (d,  $J$  = 8.4 Hz, 2H), 3.86 (t,  $J$  = 4.7 Hz, 4H), 3.19 (t,  $J$  = 4.7 Hz, 4H), 2.86 (s, 1H), 1.29–1.18 (m, 2H), 0.97–0.93 (m, 4H), 0.88 (s, 3H), 0.73–0.69 (m, 1H) ppm.  $^{13}\text{C NMR}$  (150 MHz,  $\text{CDCl}_3$ )  $\delta$  151.4, 148.6, 128.4, 126.9, 114.2, 86.3, 81.4, 78.0, 70.2, 66.9, 48.8, 38.3, 19.9, 19.6, 12.2, 7.5 ppm. **IR** (KBr):  $\nu_{\text{max}}$  = 3285, 2979, 1751, 1516, 1343, 1171  $\text{cm}^{-1}$ . **HRMS** (ESI) ( $m/z$ ): Calcd for  $\text{C}_{20}\text{H}_{23}\text{NO}_4$ ,  $[\text{M}+\text{H}]^+$ , 342.1700; found: 342.1690. **m.p.**: 198.8–202.6  $^\circ\text{C}$ .

### 1-(4-fluorophenyl)-2-(1-hydroxycyclopropyl)-2-methylpropan-1-one (19e)

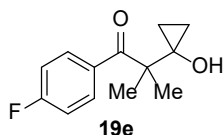

Purification by flash column chromatography on silica gel (petroleum ether/EtOAc = 10 : 1,  $R_f$  = 0.17) afforded **19e** as a white solid.  $^1\text{H NMR}$  (400 MHz,  $\text{CDCl}_3$ )  $\delta$  7.87–7.82 (m, 2H), 7.11–7.06 (m, 2H), 3.01 (s, 1H), 1.26 (s, 6H), 0.83–0.75 (m, 4H) ppm.  $^{13}\text{C NMR}$  (100 MHz,  $\text{CDCl}_3$ )  $\delta$  207.5, 164.5 (d,  $J_{\text{CF}}$  = 252.5 Hz), 134.9 (d,  $J_{\text{CF}}$  = 3.4 Hz), 130.7 (d,  $J_{\text{CF}}$  = 8.8 Hz), 115.3 (d,  $J_{\text{CF}}$  = 21.6 Hz), 60.9, 51.4, 23.2, 11.9 ppm.  $^{19}\text{F NMR}$  (564 MHz,  $\text{CDCl}_3$ )  $\delta$  -114.79 (s, 1F) ppm. **IR** (KBr):  $\nu_{\text{max}}$  = 3504, 2978, 2947, 1675, 1599, 1235, 845  $\text{cm}^{-1}$ . **HRMS** (ESI) ( $m/z$ ): Calcd for  $\text{C}_{13}\text{H}_{15}\text{FO}_2$ ,  $[\text{M}+\text{Na}]^+$ , 245.0948; found: 245.0942. **m.p.**: 57.6–60.1  $^\circ\text{C}$ .

### 7-ethynyl-7-(4-fluorophenyl)-8,8-dimethyl-4,6-dioxaspiro[2.5]octan-5-one (1e)

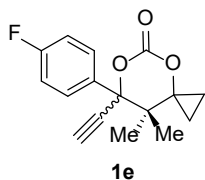

Purification by flash column chromatography on silica gel (petroleum ether/EtOAc = 5 : 1,  $R_f$  = 0.33) afforded **1e** as a white solid.  $^1\text{H NMR}$  (400 MHz,  $\text{CDCl}_3$ )  $\delta$  7.51 (dd,  $J$  = 8.7, 5.3 Hz, 2H), 7.03 (t,  $J$  = 8.6 Hz, 2H), 2.91 (s, 1H), 1.26–1.19 (m, 2H), 0.93–0.89 (m, 4H), 0.83 (s, 3H), 0.73–0.68 (m, 1H) ppm.  $^{13}\text{C NMR}$  (100 MHz,  $\text{CDCl}_3$ )  $\delta$  162.9 (d,  $J_{\text{CF}}$  = 248.6 Hz), 148.0, 131.8 (d,  $J_{\text{CF}}$  = 2.9 Hz), 129.2 (d,  $J_{\text{CF}}$  = 8.3 Hz), 114.7 (d,  $J_{\text{CF}}$  = 21.8 Hz), 85.7,

80.7, 78.6, 70.2, 38.0, 19.6, 19.4, 12.2, 7.3 ppm.  $^{19}\text{F}$  NMR (564 MHz,  $\text{CDCl}_3$ )  $\delta$  -112.94 (s, 1F) ppm. IR (KBr):  $\nu_{\text{max}}$  = 3293, 2984, 2947, 2115, 1753, 1474, 1344, 791  $\text{cm}^{-1}$ . HRMS (ESI) (m/z): Calcd for  $\text{C}_{16}\text{H}_{15}\text{FO}_3$ ,  $[\text{M}+\text{Na}]^+$ , 297.0897; found: 297.0892. m.p.: 145.5–148.3  $^{\circ}\text{C}$ .

#### 1-(4-chlorophenyl)-2-(1-hydroxycyclopropyl)-2-methylpropan-1-one (19f)

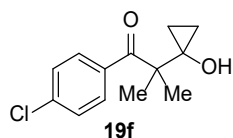

Purification by flash column chromatography on silica gel (petroleum ether/EtOAc = 3 : 1,  $R_f$  = 0.48) afforded **19f** as a white solid.  $^1\text{H}$  NMR (400 MHz,  $\text{CDCl}_3$ )  $\delta$  7.69 (d,  $J$  = 8.5 Hz, 2H), 7.33 (d,  $J$  = 8.6 Hz, 2H), 3.29 (s, 1H), 1.18 (s, 6H), 0.79–0.70 (m, 4H) ppm.  $^{13}\text{C}$  NMR (100 MHz,  $\text{CDCl}_3$ )  $\delta$  208.1, 137.2, 129.4, 128.3, 60.6, 51.4, 23.0, 11.8 ppm. IR (KBr):  $\nu_{\text{max}}$  = 3311, 1757, 2980, 1676, 1589, 1264, 1092, 836  $\text{cm}^{-1}$ . HRMS (ESI) (m/z): Calcd for  $\text{C}_{13}\text{H}_{15}\text{ClO}_2$ ,  $[\text{M}+\text{Na}]^+$ , 261.0653; found: 261.0641. m.p.: 53.4–54.4  $^{\circ}\text{C}$ .

#### 7-(4-chlorophenyl)-7-ethynyl-8,8-dimethyl-4,6-dioxaspiro[2.5]octan-5-one (1f)

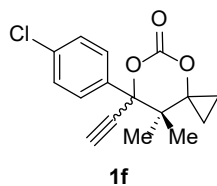

Purification by flash column chromatography on silica gel (petroleum ether/EtOAc = 5 : 1,  $R_f$  = 0.22) afforded **1f** as a white solid.  $^1\text{H}$  NMR (400 MHz,  $\text{CDCl}_3$ )  $\delta$  7.48 (d,  $J$  = 8.7 Hz, 2H), 7.34 (d,  $J$  = 8.7 Hz, 2H), 2.91 (s, 1H), 1.30–1.18 (m, 2H), 0.97–0.90 (m, 4H), 0.85 (s, 3H), 0.77–0.68 (m, 1H) ppm.  $^{13}\text{C}$  NMR (100 MHz,  $\text{CDCl}_3$ )  $\delta$  148.0, 135.0, 134.5, 128.7, 128.0, 85.7, 80.6, 78.7, 70.3, 38.0, 19.6, 19.5, 12.3, 7.4 ppm. IR (KBr):  $\nu_{\text{max}}$  = 3294, 2984, 1757, 1680, 1266, 1077, 825  $\text{cm}^{-1}$ . HRMS (ESI) (m/z): Calcd for  $\text{C}_{16}\text{H}_{15}\text{ClO}_3$ ,  $[\text{M}+\text{Na}]^+$ , 313.0602; found: 313.0592. m.p.: 122.6–123.7  $^{\circ}\text{C}$ .

#### 1-(4-bromophenyl)-2-(1-hydroxycyclopropyl)-2-methylpropan-1-one (19g)

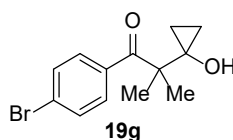

Purification by flash column chromatography on silica gel (petroleum ether/EtOAc = 3 : 1,  $R_f$  = 0.48) afforded **19g** as a white solid.  $^1\text{H}$  NMR (400 MHz,  $\text{CDCl}_3$ )  $\delta$  7.62 (d,  $J$  = 8.3 Hz, 2H), 7.52 (d,  $J$  = 8.2 Hz, 2H), 3.09 (s, 1H), 1.21 (s, 6H), 0.81–0.72 (m, 4H) ppm.  $^{13}\text{C}$  NMR (100 MHz,  $\text{CDCl}_3$ )  $\delta$  208.3, 137.8, 131.4, 129.6, 125.8, 60.8, 51.5,



29.8, 23.0, 11.9 ppm. **IR** (KBr):  $\nu_{\max}$  = 3329, 2979, 1680, 1254, 1174, 1150, 984, 742  $\text{cm}^{-1}$ . **HRMS** (ESI) ( $m/z$ ): Calcd for  $\text{C}_{13}\text{H}_{15}\text{BrO}_2$ ,  $[\text{M}+\text{Na}]^+$ , 305.0148; found: 305.0150. **m.p.**: 65.4–69.4  $^{\circ}\text{C}$ .

### 7-(4-bromophenyl)-7-ethynyl-8,8-dimethyl-4,6-dioxaspiro[2.5]octan-5-one (**1g**)

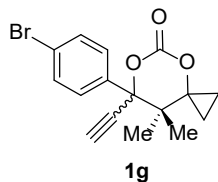

Purification by flash column chromatography on silica gel (petroleum ether/EtOAc = 5 : 1,  $R_f$  = 0.26) afforded **1g** as a white solid.  **$^1\text{H}$  NMR** (400 MHz,  $\text{CDCl}_3$ )  $\delta$  7.51 (d,  $J$  = 8.6 Hz, 2H), 7.43 (d,  $J$  = 8.6 Hz, 2H), 2.91 (s, 1H), 1.30–1.21 (m, 2H), 0.95 (s, 4H), 0.87 (s, 3H), 0.76–0.70 (m, 1H) ppm.  **$^{13}\text{C}$  NMR** (100 MHz,  $\text{CDCl}_3$ )  $\delta$  148.0, 135.1, 131.0, 129.0, 123.4, 85.8, 80.6, 78.7, 70.3, 38.0, 19.7, 19.5, 12.3, 7.4 ppm. **IR** (KBr):  $\nu_{\max}$  = 3291, 2984, 1757, 1472, 1265, 1076, 822  $\text{cm}^{-1}$ . **HRMS** (ESI) ( $m/z$ ): Calcd for  $\text{C}_{16}\text{H}_{15}\text{BrO}_3$ ,  $[\text{M}+\text{Na}]^+$ , 357.0097; found: 357.0089. **m.p.**: 196.4–198.5  $^{\circ}\text{C}$ .

### 2-(1-hydroxycyclopropyl)-2-methyl-1-(*p*-tolyl)propan-1-one (**19h**)

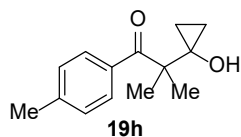

Purification by flash column chromatography on silica gel (petroleum ether/EtOAc = 3 : 1,  $R_f$  = 0.48) afforded **19h** as a white solid.  **$^1\text{H}$  NMR** (400 MHz,  $\text{CDCl}_3$ )  $\delta$  7.71 (d,  $J$  = 8.2 Hz, 2H), 7.21 (d,  $J$  = 8.0 Hz, 2H), 3.15 (s, 1H), 2.38 (s, 3H), 1.29 (s, 6H), 0.83–0.74 (m, 4H) ppm.  **$^{13}\text{C}$  NMR** (100 MHz,  $\text{CDCl}_3$ )  $\delta$  208.9, 141.9, 135.9, 128.9, 128.3, 61.0, 51.3, 23.3, 21.6, 11.7 ppm. **IR** (KBr):  $\nu_{\max}$  = 3310, 2979, 1672, 1468, 1267, 1238, 828  $\text{cm}^{-1}$ . **HRMS** (ESI) ( $m/z$ ): Calcd for  $\text{C}_{14}\text{H}_{18}\text{O}_2$ ,  $[\text{M}+\text{Na}]^+$ , 241.1199; found: 241.1189. **m.p.**: 52.7–54.6  $^{\circ}\text{C}$ .

### 7-ethynyl-8,8-dimethyl-7-(*p*-tolyl)-4,6-dioxaspiro[2.5]octan-5-one (**1h**)

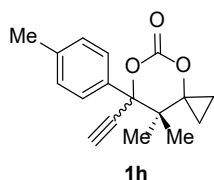

Purification by flash column chromatography on silica gel (petroleum ether/EtOAc = 5 : 1,  $R_f$  = 0.30) afforded **1h** as a white solid.  **$^1\text{H}$  NMR** (600 MHz,  $\text{CDCl}_3$ )  $\delta$  7.43 (d,  $J$  = 8.0 Hz, 2H), 7.18 (d,  $J$  = 7.9 Hz, 2H), 2.87 (s, 1H), 2.36 (s, 3H), 1.29–1.19 (m, 2H), 0.96–0.92 (m, 4H), 0.88 (s, 3H), 0.73–0.69 (m, 1H) ppm.  **$^{13}\text{C}$  NMR** (150 MHz,

CDCl<sub>3</sub>)  $\delta$  148.5, 138.8, 133.1, 128.4, 127.2, 86.3, 81.2, 78.1, 70.2, 38.0, 21.2, 19.8, 19.6, 12.2, 7.5 ppm. **IR** (KBr):  $\nu_{\max}$  = 3287, 1753, 1268, 1077, 815 cm<sup>-1</sup>. **HRMS** (ESI) (m/z): Calcd for C<sub>17</sub>H<sub>18</sub>O<sub>3</sub>, [M+Na]<sup>+</sup>, 293.1148; found: 293.1143. **m.p.**: 136.0–137.3 °C.

### 2-(1-hydroxycyclopropyl)-2-methyl-1-(4-(trifluoromethyl)phenyl)propan-1-one (19i)

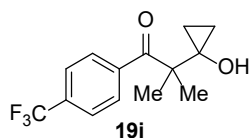

Purification by flash column chromatography on silica gel (petroleum ether/EtOAc = 3 : 1, R<sub>f</sub> = 0.48) afforded **19i** as a light yellow solid. **<sup>1</sup>H NMR** (400 MHz, CDCl<sub>3</sub>)  $\delta$  7.77 (d, *J* = 8.1 Hz, 2H), 7.64 (d, *J* = 8.2 Hz, 2H), 3.09 (s, 1H), 1.20 (s, 6H), 0.82–0.70 (m, 4H) ppm. **<sup>13</sup>C NMR** (100 MHz, CDCl<sub>3</sub>)  $\delta$  209.3, 142.9, 132.3 (q, *J*<sub>CF</sub> = 33.0 Hz), 127.8, 125.2 (q, *J*<sub>CF</sub> = 3.5 Hz), 122.5 (q, *J*<sub>CF</sub> = 271 Hz), 60.6, 51.7, 22.7, 11.7 ppm. **<sup>19</sup>F NMR** (564 MHz, CDCl<sub>3</sub>)  $\delta$  -62.54 (s, 3F) ppm. **IR** (KBr):  $\nu_{\max}$  = 3308, 2978, 1678, 1263, 1235, 832 cm<sup>-1</sup>. **HRMS** (ESI) (m/z): Calcd for C<sub>14</sub>H<sub>15</sub>F<sub>3</sub>O<sub>2</sub>, [M+Na]<sup>+</sup>, 295.0916; found: 295.0924. **m.p.**: 55.1–56.2 °C.

### 7-ethynyl-8,8-dimethyl-7-(4-(trifluoromethyl)phenyl)-4,6-dioxaspiro[2.5]octan-5-one (1i)

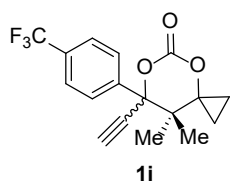

Purification by flash column chromatography on silica gel (petroleum ether/EtOAc = 5 : 1, R<sub>f</sub> = 0.26) afforded **1i** as a white solid. **<sup>1</sup>H NMR** (400 MHz, CDCl<sub>3</sub>)  $\delta$  7.66 (d, *J* = 8.2 Hz, 2H), 7.60 (d, *J* = 8.3 Hz, 2H), 2.96 (s, 1H), 1.27–1.17 (m, 2H), 0.92–0.83 (m, 7H), 0.75–0.66 (m, 1H) ppm. **<sup>13</sup>C NMR** (100 MHz, CDCl<sub>3</sub>)  $\delta$  147.7, 139.9, 130.9 (q, *J*<sub>CF</sub> = 32.7 Hz), 127.7, 124.7 (q, *J*<sub>CF</sub> = 3.4 Hz), 122.4 (q, *J*<sub>CF</sub> = 271 Hz), 85.6, 80.2, 79.0, 70.3, 37.9, 19.4, 19.3, 12.52, 7.2 ppm. **<sup>19</sup>F NMR** (564 MHz, CDCl<sub>3</sub>)  $\delta$  -62.76 (s, 3F) ppm. **IR** (KBr):  $\nu_{\max}$  = 3302, 2987, 1760, 1328, 1126, 1073, 836 cm<sup>-1</sup>. **HRMS** (ESI) (m/z): Calcd for C<sub>17</sub>H<sub>15</sub>F<sub>3</sub>O<sub>3</sub>, [M+Na]<sup>+</sup>, 347.0866; found: 347.0858. **m.p.**: 146.2–148.7 °C.

### 1-([1,1'-biphenyl]-4-yl)-2-(1-hydroxycyclopropyl)-2-methylpropan-1-one (19j)

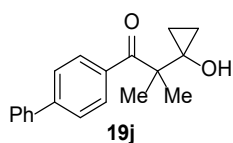

Purification by flash column chromatography on silica gel (petroleum ether/EtOAc = 3 : 1, R<sub>f</sub> = 0.46) afforded **19j**

as a white solid.  $^1\text{H NMR}$  (400 MHz,  $\text{CDCl}_3$ )  $\delta$  7.90 (d,  $J = 8.4$  Hz, 2H), 7.64 (dd,  $J = 9.9, 8.1$  Hz, 4H), 7.47 (t,  $J = 7.5$  Hz, 2H), 7.40 (t,  $J = 7.3$  Hz, 1H), 3.14 (s, 1H), 1.34 (s, 6H), 0.89–0.78 (m, 4H) ppm.  $^{13}\text{C NMR}$  (100 MHz,  $\text{CDCl}_3$ )  $\delta$  208.9, 144.0, 140.1, 137.4, 129.0, 128.7, 128.1, 127.3, 126.9, 61.0, 51.5, 23.3, 11.8 ppm. **IR** (KBr):  $\nu_{\text{max}} = 3327, 2979, 1671, 1603, 1264, 1237, 977, 847$   $\text{cm}^{-1}$ . **HRMS** (ESI) ( $m/z$ ): Calcd for  $\text{C}_{19}\text{H}_{20}\text{O}_2$ ,  $[\text{M}+\text{Na}]^+$ , 303.1356; found: 303.1342. **m.p.**: 80.8–81.2  $^\circ\text{C}$ .

### 7-([1,1'-biphenyl]-4-yl)-7-ethynyl-8,8-dimethyl-4,6-dioxaspiro[2.5]octan-5-one (**1j**)

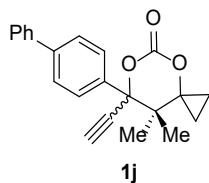

Purification by flash column chromatography on silica gel (petroleum ether/EtOAc = 5 : 1,  $R_f = 0.19$ ) afforded **1j** as a white solid.  $^1\text{H NMR}$  (400 MHz,  $\text{CDCl}_3$ )  $\delta$  7.66–7.58 (m, 6H), 7.46 (t,  $J = 7.5$  Hz, 2H), 7.37 (t,  $J = 7.3$  Hz, 1H), 2.92 (s, 1H), 1.35–1.24 (m, 2H), 1.02–0.94 (m, 7H), 0.79–0.72 (m, 1H) ppm.  $^{13}\text{C NMR}$  (100 MHz,  $\text{CDCl}_3$ )  $\delta$  148.4, 141.7, 140.1, 134.9, 129.0, 127.8, 127.8, 127.2, 126.4, 86.2, 81.0, 78.4, 70.3, 38.1, 19.8, 19.6, 12.3, 7.5 ppm. **IR** (KBr):  $\nu_{\text{max}} = 3288, 2984, 1754, 1272, 1077, 764$   $\text{cm}^{-1}$ . **HRMS** (ESI) ( $m/z$ ): Calcd for  $\text{C}_{22}\text{H}_{20}\text{O}_3$ ,  $[\text{M}+\text{Na}]^+$ , 355.1305; found: 355.1296. **m.p.**: 176.7–177.6  $^\circ\text{C}$ .

### 2-(1-hydroxycyclopropyl)-1-(3-methoxyphenyl)-2-methylpropan-1-one (**19k**)

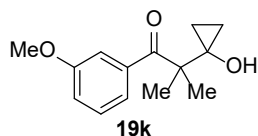

Purification by flash column chromatography on silica gel (petroleum ether/EtOAc = 3 : 1,  $R_f = 0.43$ ) afforded **19k** as a light yellow solid.  $^1\text{H NMR}$  (400 MHz,  $\text{CDCl}_3$ )  $\delta$  7.33–7.23 (m, 3H), 6.97 (d,  $J = 7.8$  Hz, 1H), 3.78 (s, 3H), 3.24 (s, 1H), 1.22 (s, 6H), 0.79–0.72 (m, 4H) ppm.  $^{13}\text{C NMR}$  (100 MHz,  $\text{CDCl}_3$ )  $\delta$  209.3, 159.2, 140.3, 129.1, 120.0, 116.8, 113.0, 60.7, 55.3, 51.4, 23.0, 11.7 ppm. **IR** (KBr):  $\nu_{\text{max}} = 3443, 2976, 2938, 1678, 1240, 991$   $\text{cm}^{-1}$ . **HRMS** (ESI) ( $m/z$ ): Calcd for  $\text{C}_{14}\text{H}_{18}\text{O}_3$ ,  $[\text{M}+\text{Na}]^+$ , 257.1148; found: 257.1137. **m.p.**: 60.3–61.2  $^\circ\text{C}$ .

### 7-ethynyl-7-(3-methoxyphenyl)-8,8-dimethyl-4,6-dioxaspiro[2.5]octan-5-one (**1k**)

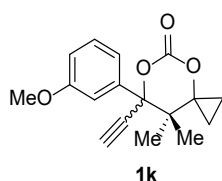

Purification by flash column chromatography on silica gel (petroleum ether/EtOAc = 5 : 1,  $R_f$  = 0.19) afforded **1k** as a white solid. **<sup>1</sup>H NMR** (400 MHz, CDCl<sub>3</sub>)  $\delta$  7.24 (t,  $J$  = 8.0 Hz, 1H), 7.12–7.00 (m, 2H), 6.85 (d,  $J$  = 8.0 Hz, 1H), 3.75 (s, 3H), 2.88 (s, 1H), 1.25–1.14 (m, 2H), 0.92–0.84 (m, 7H), 0.74–0.64 (m, 1H) ppm. **<sup>13</sup>C NMR** (100 MHz, CDCl<sub>3</sub>)  $\delta$  158.8, 148.2, 137.3, 128.6, 119.6, 113.5, 85.9, 80.8, 78.3, 70.2, 55.3, 37.8, 19.6, 19.5, 12.1, 7.3 ppm. **IR** (KBr):  $\nu_{\max}$  = 3284, 2984, 1755, 1605, 1271, 1241, 1075 cm<sup>-1</sup>. **HRMS** (ESI) (m/z): Calcd for C<sub>17</sub>H<sub>18</sub>O<sub>4</sub>, [M+H]<sup>+</sup>, 287.1278; found: 287.1273. **m.p.**: 207.4–209.5 °C.

### 1-(3-fluorophenyl)-2-(1-hydroxycyclopropyl)-2-methylpropan-1-one (**19l**)

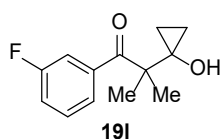

Purification by flash column chromatography on silica gel (petroleum ether/EtOAc = 10 : 1,  $R_f$  = 0.21) afforded **19l** as a white solid. **<sup>1</sup>H NMR** (400 MHz, CDCl<sub>3</sub>)  $\delta$  7.50 (d,  $J$  = 7.8 Hz, 1H), 7.43 (dt,  $J$  = 9.6, 2.0 Hz, 1H), 7.35 (td,  $J$  = 8.0, 5.6 Hz, 1H), 7.14 (td,  $J$  = 8.3, 2.6 Hz, 1H), 3.16 (s, 1H), 1.21 (s, 6H), 0.81–0.72 (m, 4H) ppm. **<sup>13</sup>C NMR** (100 MHz, CDCl<sub>3</sub>)  $\delta$  208.2, 162.3 (d,  $J_{CF}$  = 247.2 Hz), 141.1 (d,  $J_{CF}$  = 6.1 Hz), 129.9 (d,  $J_{CF}$  = 7.8 Hz), 123.5 (d,  $J_{CF}$  = 3.1 Hz), 117.9 (d,  $J_{CF}$  = 21.1 Hz), 114.9 (d,  $J_{CF}$  = 23.1 Hz), 60.6, 51.6, 22.9, 11.8 ppm. **<sup>19</sup>F NMR** (564 MHz, CDCl<sub>3</sub>)  $\delta$  -112.09 (s, 1F) ppm. **IR** (KBr):  $\nu_{\max}$  = 3309, 2978, 1687, 1584, 1478, 1270 cm<sup>-1</sup>. **HRMS** (ESI) (m/z): Calcd for C<sub>13</sub>H<sub>15</sub>FO<sub>2</sub>, [M+Na]<sup>+</sup>, 245.0948; found: 245.0945. **m.p.**: 61.8–63.4 °C.

### 7-ethynyl-7-(3-fluorophenyl)-8,8-dimethyl-4,6-dioxaspiro[2.5]octan-5-one (**1l**)

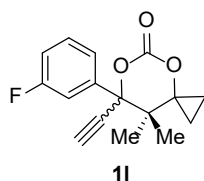

Purification by flash column chromatography on silica gel (petroleum ether/EtOAc = 5 : 1,  $R_f$  = 0.4) afforded **1l** as a white solid. **<sup>1</sup>H NMR** (400 MHz, CDCl<sub>3</sub>)  $\delta$  7.39–7.34 (m, 2H), 7.30–7.27 (m, 1H), 7.12–7.05 (m, 1H), 2.92 (s, 1H), 1.33–1.21 (m, 2H), 1.00–0.94 (m, 4H), 0.90 (s, 3H), 0.78–0.71 (m, 1H) ppm. **<sup>13</sup>C NMR** (100 MHz, CDCl<sub>3</sub>)  $\delta$  162.2 (d,  $J_{CF}$  = 246.2 Hz), 148.0, 138.5 (d,  $J_{CF}$  = 7.2 Hz), 129.4 (d,  $J_{CF}$  = 8.1 Hz), 123.1 (d,  $J_{CF}$  = 2.9 Hz), 116.0 (d,  $J_{CF}$  = 21.0 Hz), 114.8 (d,  $J_{CF}$  = 24.2 Hz), 85.6, 80.6, 78.6, 70.3, 38.1, 19.7, 19.6, 12.4, 7.4 ppm. **<sup>19</sup>F NMR** (564 MHz, CDCl<sub>3</sub>)  $\delta$  -112.53 (s, 1F) ppm. **IR** (KBr):  $\nu_{\max}$  = 3294, 2986, 1759, 1592, 1238, 1026 cm<sup>-1</sup>. **HRMS** (ESI) (m/z): Calcd for C<sub>16</sub>H<sub>15</sub>FO<sub>3</sub>, [M+Na]<sup>+</sup>, 297.0897; found: 297.0896. **m.p.**: 136.7–141.6 °C.

### 1-(3-chlorophenyl)-2-(1-hydroxycyclopropyl)-2-methylpropan-1-one (19m)

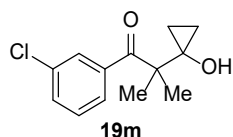

Purification by flash column chromatography on silica gel (petroleum ether/EtOAc = 10 : 1,  $R_f$  = 0.33) afforded **19m** as a white solid.  $^1\text{H NMR}$  (400 MHz,  $\text{CDCl}_3$ )  $\delta$  7.70 (t,  $J$  = 1.9 Hz, 1H), 7.60 (d,  $J$  = 7.7 Hz, 1H), 7.44 (d,  $J$  = 8.1 Hz, 1H), 7.34 (t,  $J$  = 7.9 Hz, 1H), 2.91 (s, 1H), 1.24 (s, 6H), 0.84–0.74 (m, 4H) ppm.  $^{13}\text{C NMR}$  (100 MHz,  $\text{CDCl}_3$ )  $\delta$  208.4, 140.8, 134.4, 131.0, 129.6, 127.9, 125.8, 60.7, 51.7, 23.0, 11.8 ppm. **IR** (KBr):  $\nu_{\text{max}}$  = 3476, 2976, 2944, 1689, 1566, 1471, 1263, 991, 743  $\text{cm}^{-1}$ . **HRMS** (ESI) ( $m/z$ ): Calcd for  $\text{C}_{13}\text{H}_{15}\text{ClO}_2$ ,  $[\text{M}+\text{Na}]^+$ , 261.0653; found: 261.0641. **m.p.**: 83.0–84.2  $^\circ\text{C}$ .

### 7-(3-chlorophenyl)-7-ethynyl-8,8-dimethyl-4,6-dioxaspiro[2.5]octan-5-one (1m)

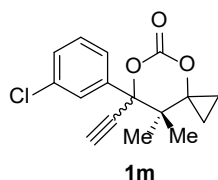

Purification by flash column chromatography on silica gel (petroleum ether/EtOAc = 5 : 1,  $R_f$  = 0.33) afforded **1m** as a light yellow solid.  $^1\text{H NMR}$  (400 MHz,  $\text{CDCl}_3$ )  $\delta$  7.54 (d,  $J$  = 2.3 Hz, 1H), 7.46–7.43 (m, 1H), 7.38–7.27 (m, 2H), 2.92 (s, 1H), 1.31–1.19 (m, 2H), 0.98–0.94 (m, 4H), 0.88 (s, 3H), 0.77–0.70 (m, 1H) ppm.  $^{13}\text{C NMR}$  (100 MHz,  $\text{CDCl}_3$ )  $\delta$  147.9, 137.9, 134.0, 129.2, 129.1, 127.5, 125.6, 85.6, 80.4, 78.8, 70.3, 38.0, 19.6, 19.5, 12.3, 7.4 ppm. **IR** (KBr):  $\nu_{\text{max}}$  = 3293, 2984, 2947, 2115, 1753, 1474, 1416, 1344, 760  $\text{cm}^{-1}$ . **HRMS** (ESI) ( $m/z$ ): Calcd for  $\text{C}_{16}\text{H}_{15}\text{ClO}_3$ ,  $[\text{M}+\text{Na}]^+$ , 313.0602; found: 313.0595. **m.p.**: 159.3–162.4  $^\circ\text{C}$ .

### 1-(3-bromophenyl)-2-(1-hydroxycyclopropyl)-2-methylpropan-1-one (19n)

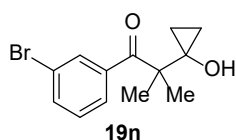

Purification by flash column chromatography on silica gel (petroleum ether/EtOAc = 5 : 1,  $R_f$  = 0.25) afforded **19n** as a white solid.  $^1\text{H NMR}$  (400 MHz,  $\text{CDCl}_3$ )  $\delta$  7.86 (s, 1H), 7.65 (d,  $J$  = 7.7 Hz, 1H), 7.60 (d,  $J$  = 7.3 Hz, 1H), 7.29 (t,  $J$  = 8.0 Hz, 1H), 2.93–2.81 (m, 1H), 1.24 (s, 6H), 0.85–0.74 (m, 4H) ppm.  $^{13}\text{C NMR}$  (100 MHz,  $\text{CDCl}_3$ )  $\delta$  1208.2, 141.1, 133.9, 130.8, 129.8, 126.2, 122.5, 60.8, 51.7, 23.0, 11.8 ppm. **IR** (KBr):  $\nu_{\text{max}}$  = 3323, 2979, 1680, 1563, 1468, 1254, 1150  $\text{cm}^{-1}$ . **HRMS** (ESI) ( $m/z$ ): Calcd for  $\text{C}_{13}\text{H}_{15}\text{BrO}_2$ ,  $[\text{M}+\text{Na}]^+$ , 305.0148; found: 305.0136.

**m.p.:** 67.4–69.3 °C.

### 7-(3-bromophenyl)-7-ethynyl-8,8-dimethyl-4,6-dioxaspiro[2.5]octan-5-one (**1n**)

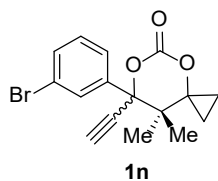

Purification by flash column chromatography on silica gel (petroleum ether/EtOAc = 5 : 1,  $R_f$  = 0.28) afforded **1n** as a white solid.  $^1\text{H NMR}$  (400 MHz,  $\text{CDCl}_3$ )  $\delta$  7.71 (s, 1H), 7.52–7.49 (m, 2H), 7.30–7.25 (m, 1H), 2.93 (s, 1H), 1.32–1.21 (m, 2H), 1.00–0.95 (m, 4H), 0.89 (s, 3H), 0.79–0.71 (m, 1H) ppm.  $^{13}\text{C NMR}$  (100 MHz,  $\text{CDCl}_3$ )  $\delta$  147.8, 138.1, 132.0, 130.2, 129.3, 126.0, 121.9, 85.4, 80.4, 78.7, 70.2, 37.9, 19.6, 19.5, 12.2, 7.3 ppm. **IR** (KBr):  $\nu_{\text{max}}$  = 3291, 2983, 1758, 1472, 1265, 1104  $\text{cm}^{-1}$ . **HRMS** (ESI) ( $m/z$ ): Calcd for  $\text{C}_{16}\text{H}_{15}\text{BrO}_3$ ,  $[\text{M}+\text{Na}]^+$ , 357.0097; found: 357.0093. **m.p.:** 105.4–106.3 °C.

### 2-(1-hydroxycyclopropyl)-2-methyl-1-(*m*-tolyl)propan-1-one (**19o**)

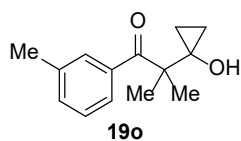

Purification by flash column chromatography on silica gel (petroleum ether/EtOAc = 3 : 1,  $R_f$  = 0.51) afforded **19o** as a light yellow solid.  $^1\text{H NMR}$  (400 MHz,  $\text{CDCl}_3$ )  $\delta$  7.60–7.46 (m, 2H), 7.27 (d,  $J$  = 5.4 Hz, 2H), 3.22 (s, 1H), 2.37 (s, 3H), 1.25 (s, 6H), 0.82–0.71 (m, 4H) ppm.  $^{13}\text{C NMR}$  (100 MHz,  $\text{CDCl}_3$ )  $\delta$  210.1, 139.2, 137.9, 131.7, 128.3, 128.0, 124.7, 60.71, 51.4, 23.1, 21.5, 11.6 ppm. **IR** (KBr):  $\nu_{\text{max}}$  = 3515, 2977, 2928, 1676, 1467, 1272, 1142, 981  $\text{cm}^{-1}$ . **HRMS** (ESI) ( $m/z$ ): Calcd for  $\text{C}_{14}\text{H}_{18}\text{O}_2$ ,  $[\text{M}+\text{Na}]^+$ , 241.1199; found: 241.1191. **m.p.:** 53.4–54.4 °C.

### 7-ethynyl-8,8-dimethyl-7-(*m*-tolyl)-4,6-dioxaspiro[2.5]octan-5-one (**1o**)

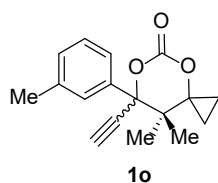

Purification by flash column chromatography on silica gel (petroleum ether/EtOAc = 5 : 1,  $R_f$  = 0.35) afforded **1o** as a light yellow solid.  $^1\text{H NMR}$  (400 MHz,  $\text{CDCl}_3$ )  $\delta$  7.32 (d,  $J$  = 8.8 Hz, 2H), 7.22 (t,  $J$  = 7.6 Hz, 1H), 7.14 (d,  $J$  = 7.5 Hz, 1H), 2.87 (s, 1H), 2.34 (s, 3H), 1.25–1.18 (m, 2H), 0.93–0.84 (m, 7H), 0.71–0.67 (m, 1H) ppm.  $^{13}\text{C NMR}$  (100 MHz,  $\text{CDCl}_3$ )  $\delta$  148.3, 137.3, 135.7, 129.5, 127.6, 127.5, 124.4, 86.2, 81.0, 78.2, 70.1, 37.8, 21.5, 19.6, 19.5,

12.1, 7.3 ppm. **IR** (KBr):  $\nu_{\max}$  = 3526, 3286, 1756, 1268, 1076  $\text{cm}^{-1}$ . **HRMS** (ESI) (m/z): Calcd for  $\text{C}_{17}\text{H}_{18}\text{O}_3$ ,  $[\text{M}+\text{Na}]^+$ , 293.1148; found: 293.1142. **m.p.**: 123.4–125.7  $^{\circ}\text{C}$ .

### 1-(2-fluorophenyl)-2-(1-hydroxycyclopropyl)-2-methylpropan-1-one (19p)

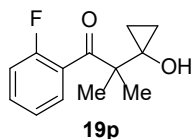

Purification by flash column chromatography on silica gel (petroleum ether/EtOAc = 3 : 1,  $R_f$  = 0.46) afforded **19p** as a light yellow solid.  **$^1\text{H}$  NMR** (400 MHz,  $\text{CDCl}_3$ )  $\delta$  7.40–7.29 (m, 2H), 7.15 (t,  $J$  = 7.5 Hz, 1H), 7.08 (t,  $J$  = 9.0 Hz, 1H), 3.07 (s, 1H), 1.17 (s, 6H), 0.75–0.65 (m, 4H) ppm.  **$^{13}\text{C}$  NMR** (100 MHz,  $\text{CDCl}_3$ )  $\delta$  210.2, 158.0 (d,  $J_{\text{CF}}$  = 246.5 Hz), 131.0 (d,  $J_{\text{CF}}$  = 8.0 Hz), 129.1 (d,  $J_{\text{CF}}$  = 19.2 Hz), 127.8 (d,  $J_{\text{CF}}$  = 4.1 Hz), 123.9 (d,  $J_{\text{CF}}$  = 3.2 Hz), 115.9 (d,  $J_{\text{CF}}$  = 21.8 Hz), 60.1, 52.1, 21.6, 10.7 ppm.  **$^{19}\text{F}$  NMR** (564 MHz,  $\text{CDCl}_3$ )  $\delta$  -113.71 (s, 1F) ppm. **IR** (KBr):  $\nu_{\max}$  = 3303, 3051, 1700, 1492, 1483  $\text{cm}^{-1}$ . **HRMS** (ESI) (m/z): Calcd for  $\text{C}_{13}\text{H}_{15}\text{FO}_2$ ,  $[\text{M}+\text{Na}]^+$ , 245.0948; found: 245.0941. **m.p.**: 36.0–37.1  $^{\circ}\text{C}$ .

### 7-ethynyl-7-(2-fluorophenyl)-8,8-dimethyl-4,6-dioxaspiro[2.5]octan-5-one (1p)

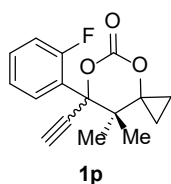

Purification by flash column chromatography on silica gel (petroleum ether/EtOAc = 5 : 1,  $R_f$  = 0.26) afforded **1p** as a light yellow solid.  **$^1\text{H}$  NMR** (400 MHz,  $\text{CDCl}_3$ )  $\delta$  7.59 (t,  $J$  = 7.8 Hz, 1H), 7.38 (q,  $J$  = 6.8 Hz, 1H), 7.19 (t,  $J$  = 7.6 Hz, 1H), 7.10 (dd,  $J$  = 11.9, 8.4 Hz, 1H), 2.88 (s, 1H), 1.29–1.18 (m, 2H), 1.05–0.92 (m, 7H), 0.74–0.67 (m, 1H) ppm.  **$^{13}\text{C}$  NMR** (100 MHz,  $\text{CDCl}_3$ )  $\delta$  159.3 (d,  $J_{\text{CF}}$  = 251.5 Hz), 147.9, 131.0 (d,  $J_{\text{CF}}$  = 8.9 Hz), 129.7 (d,  $J_{\text{CF}}$  = 2.0 Hz), 123.7 (d,  $J_{\text{CF}}$  = 3.5 Hz), 123.2 (d,  $J_{\text{CF}}$  = 8.6 Hz), 116.9 (d,  $J_{\text{CF}}$  = 23.8 Hz), 79.6, 77.91, 77.88, 69.5, 38.9, 20.00, 19.96, 19.7, 11.6, 7.4 ppm.  **$^{19}\text{F}$  NMR** (564 MHz,  $\text{CDCl}_3$ )  $\delta$  -105.77 (s, 1F) ppm. **IR** (KBr):  $\nu_{\max}$  = 3298, 3055, 2982, 1755, 1492, 1269  $\text{cm}^{-1}$ . **HRMS** (ESI) (m/z): Calcd for  $\text{C}_{16}\text{H}_{15}\text{FO}_3$ ,  $[\text{M}+\text{Na}]^+$ , 297.0897; found: 297.0892. **m.p.**: 194.6–196.3  $^{\circ}\text{C}$ .

### 1-(4-chloro-3-methoxyphenyl)-2-(1-hydroxycyclopropyl)-2-methylpropan-1-one (19q)

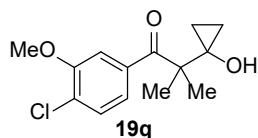

Purification by flash column chromatography on silica gel (petroleum ether/EtOAc = 5 : 1,  $R_f$  = 0.6) afforded **19q** as a light yellow solid.  $^1\text{H NMR}$  (400 MHz,  $\text{CDCl}_3$ )  $\delta$  7.34 (s, 3H), 3.87 (s, 3H), 3.19 (s, 1H), 1.18 (s, 6H), 0.82–0.70 (m, 4H) ppm.  $^{13}\text{C NMR}$  (100 MHz,  $\text{CDCl}_3$ )  $\delta$  207.5, 154.8, 138.3, 129.6, 125.7, 120.8, 111.9, 60.7, 56.2, 51.5, 23.1, 12.1 ppm. **IR** (KBr):  $\nu_{\text{max}}$  = 3329, 2978, 1677, 1468, 1268, 1243, 1069  $\text{cm}^{-1}$ . **HRMS** (ESI) (m/z): Calcd for  $\text{C}_{14}\text{H}_{17}\text{ClO}_3$ ,  $[\text{M}+\text{H}]^+$ , 269.0939; found: 269.0929. **m.p.**: 78.9–80.1  $^\circ\text{C}$ .

#### 7-(4-chloro-3-methoxyphenyl)-7-ethynyl-8,8-dimethyl-4,6-dioxaspiro[2.5]octan-5-one (**1q**)

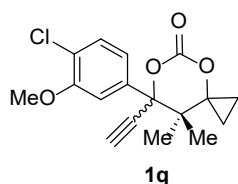

Purification by flash column chromatography on silica gel (petroleum ether/EtOAc = 5 : 1,  $R_f$  = 0.48) afforded **1q** as a light yellow solid.  $^1\text{H NMR}$  (400 MHz,  $\text{CDCl}_3$ )  $\delta$  7.32 (d,  $J$  = 8.9 Hz, 1H), 7.06 (d,  $J$  = 6.8 Hz, 2H), 3.87 (s, 3H), 2.92 (s, 1H), 1.28–1.18 (m, 2H), 0.94–0.84 (m, 7H), 0.75–0.68 (m, 1H) ppm.  $^{13}\text{C NMR}$  (100 MHz,  $\text{CDCl}_3$ )  $\delta$  154.3, 147.9, 135.9, 129.3, 123.3, 120.4, 111.1, 85.6, 80.5, 78.6, 70.3, 56.3, 38.0, 19.6, 19.5, 12.3, 7.3 ppm. **IR** (KBr):  $\nu_{\text{max}}$  = 3290, 2983, 1757, 1490, 1468, 1268, 1243, 1069  $\text{cm}^{-1}$ . **HRMS** (ESI) (m/z): Calcd for  $\text{C}_{17}\text{H}_{17}\text{ClO}_4$ ,  $[\text{M}+\text{Na}]^+$ , 343.0708; found: 343.0712. **m.p.**: 171.2–174.7  $^\circ\text{C}$ .

#### 1-(3,4-dichlorophenyl)-2-(1-hydroxycyclopropyl)-2-methylpropan-1-one (**19r**)

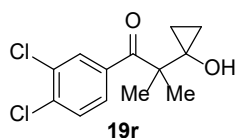

Purification by flash column chromatography on silica gel (petroleum ether/EtOAc = 5 : 1,  $R_f$  = 0.31) afforded **19r** as a light yellow solid.  $^1\text{H NMR}$  (400 MHz,  $\text{CDCl}_3$ )  $\delta$  7.87 (d,  $J$  = 1.8 Hz, 1H), 7.61 (dd,  $J$  = 8.3, 1.9 Hz, 1H), 7.49 (d,  $J$  = 8.4 Hz, 1H), 2.76 (s, 1H), 1.23 (s, 6H), 0.86–0.77 (m, 4H) ppm.  $^{13}\text{C NMR}$  (100 MHz,  $\text{CDCl}_3$ )  $\delta$  206.8, 138.6, 135.5, 132.8, 130.3, 130.2, 127.2, 60.8, 51.7, 23.0, 12.1 ppm. **IR** (KBr):  $\nu_{\text{max}}$  = 3306, 2981, 1681, 1467, 1271  $\text{cm}^{-1}$ . **HRMS** (ESI) (m/z): Calcd for  $\text{C}_{13}\text{H}_{14}\text{Cl}_2\text{O}_2$ ,  $[\text{M}+\text{Na}]^+$ , 295.0263; found: 295.0258. **m.p.**: 93.2–96.4  $^\circ\text{C}$ .

#### 7-(3,4-dichlorophenyl)-7-ethynyl-8,8-dimethyl-4,6-dioxaspiro[2.5]octan-5-one (**1r**)

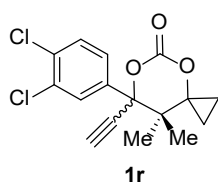



Purification by flash column chromatography on silica gel (petroleum ether/EtOAc = 5 : 1,  $R_f$  = 0.32) afforded **1r** as a light yellow solid.  $^1\text{H NMR}$  (400 MHz,  $\text{CDCl}_3$ )  $\delta$  7.66 (s, 1H), 7.47 (d,  $J$  = 8.4 Hz, 1H), 7.41 (d,  $J$  = 8.5 Hz, 1H), 2.94 (s, 1H), 1.34–1.21 (m, 2H), 1.01–0.94 (m, 4H), 0.88 (s, 3H), 0.79–0.72 (m, 1H) ppm.  $^{13}\text{C NMR}$  (100 MHz,  $\text{CDCl}_3$ )  $\delta$  147.7, 136.2, 133.5, 132.4, 129.8, 129.4, 126.7, 85.2, 80.2, 79.1, 70.4, 38.1, 19.64, 19.56, 12.4, 7.4 ppm. **IR** (KBr):  $\nu_{\text{max}}$  = 3298, 2984, 1758, 1471, 1264  $\text{cm}^{-1}$ . **HRMS** (ESI) ( $m/z$ ): Calcd for  $\text{C}_{16}\text{H}_{14}\text{Cl}_2\text{O}_3$ ,  $[\text{M}+\text{Na}]^+$ , 347.0212; found: 347.0207. **m.p.**: 86.2–88.4  $^\circ\text{C}$ .

### 1-(4-bromo-3-methylphenyl)-2-(1-hydroxycyclopropyl)-2-methylpropan-1-one (19s)

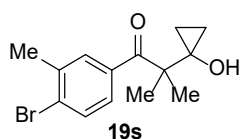

Purification by flash column chromatography on silica gel (petroleum ether/EtOAc = 5 : 1,  $R_f$  = 0.4) afforded **19s** as a light yellow solid.  $^1\text{H NMR}$  (400 MHz,  $\text{CDCl}_3$ )  $\delta$  7.58 (s, 1H), 7.52 (d,  $J$  = 8.3 Hz, 1H), 7.42 (dd,  $J$  = 8.3, 2.2 Hz, 1H), 3.20 (s, 1H), 2.39 (s, 3H), 1.20 (s, 6H), 0.79–0.72 (m, 4H) ppm.  $^{13}\text{C NMR}$  (100 MHz,  $\text{CDCl}_3$ )  $\delta$  208.5, 138.1, 138.0, 132.0, 130.2, 128.1, 126.6, 60.6, 51.5, 23.0, 23.0, 11.8 ppm. **IR** (KBr):  $\nu_{\text{max}}$  = 3387, 3087, 2980, 1676, 1470, 1257, 1026, 820  $\text{cm}^{-1}$ . **HRMS** (ESI) ( $m/z$ ): Calcd for  $\text{C}_{14}\text{H}_{17}\text{BrO}_2$ ,  $[\text{M}+\text{H}]^+$ , 297.0485; found: 297.0472. **m.p.**: 63.1–64.1  $^\circ\text{C}$ .

### 7-(4-bromo-3-methylphenyl)-7-ethynyl-8,8-dimethyl-4,6-dioxaspiro[2.5]octan-5-one (1s)

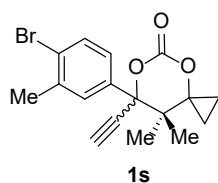

Purification by flash column chromatography on silica gel (petroleum ether/EtOAc = 5 : 1,  $R_f$  = 0.31) afforded **1s** as a light yellow solid.  $^1\text{H NMR}$  (400 MHz,  $\text{CDCl}_3$ )  $\delta$  7.49 (d,  $J$  = 8.4 Hz, 1H), 7.38 (s, 1H), 7.21 (d,  $J$  = 10.1 Hz, 1H), 2.91 (s, 1H), 2.39 (s, 3H), 1.28–1.17 (m, 2H), 0.94–0.84 (m, 7H), 0.74–0.68 (m, 1H) ppm.  $^{13}\text{C NMR}$  (100 MHz,  $\text{CDCl}_3$ )  $\delta$  148.0, 137.4, 135.2, 131.6, 129.4, 126.3, 125.6, 85.7, 80.6, 78.6, 70.2, 37.8, 23.1, 19.6, 19.5, 12.2, 7.3 ppm. **IR** (KBr):  $\nu_{\text{max}}$  = 3291, 2984, 1758, 1626, 1343, 1267, 1064, 757  $\text{cm}^{-1}$ . **HRMS** (ESI) ( $m/z$ ): Calcd for  $\text{C}_{17}\text{H}_{17}\text{BrO}_3$ ,  $[\text{M}+\text{Na}]^+$ , 371.0253; found: 371.0255. **m.p.**: 161.5–163.4  $^\circ\text{C}$ .

### 1-(benzo[d][1,3]dioxol-5-yl)-2-(1-hydroxycyclopropyl)-2-methylpropan-1-one (19t)

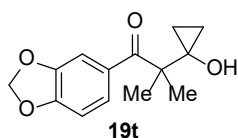

Purification by flash column chromatography on silica gel (petroleum ether/EtOAc = 5 : 1,  $R_f$  = 0.22) afforded **19t** as a colorless oil. **<sup>1</sup>H NMR** (600 MHz, CDCl<sub>3</sub>)  $\delta$  7.50 (d,  $J$  = 8.2 Hz, 1H), 7.37 (s, 1H), 6.81 (d,  $J$  = 8.2 Hz, 1H), 6.00 (s, 2H), 3.09 (s, 1H), 1.27 (s, 6H), 0.83–0.77 (m, 4H) ppm. **<sup>13</sup>C NMR** (150 MHz, CDCl<sub>3</sub>)  $\delta$  206.3, 150.4, 147.7, 132.3, 124.2, 109.1, 107.8, 101.7, 61.2, 51.3, 23.5, 12.0 ppm. **IR** (KBr):  $\nu_{\max}$  = 3306, 2925, 1664, 1485, 1435, 1254, 1037, 930 cm<sup>-1</sup>. **HRMS** (ESI) ( $m/z$ ): Calcd for C<sub>14</sub>H<sub>16</sub>O<sub>4</sub>, [M+Na]<sup>+</sup>, 271.0941; found: 271.0928.

### 7-(benzo[d][1,3]dioxol-5-yl)-7-ethynyl-8,8-dimethyl-4,6-dioxaspiro[2.5]octan-5-one (1t)

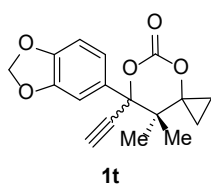

Purification by flash column chromatography on silica gel (petroleum ether/EtOAc = 5 : 1,  $R_f$  = 0.15) afforded **1t** as a white solid. **<sup>1</sup>H NMR** (400 MHz, CDCl<sub>3</sub>)  $\delta$  7.04 (d,  $J$  = 7.6 Hz, 2H), 6.80 (d,  $J$  = 8.2 Hz, 1H), 5.99 (s, 2H), 2.88 (s, 1H), 1.28–1.19 (m, 2H), 0.98 (s, 4H), 0.87 (s, 3H), 0.76–0.70 (m, 1H) ppm. **<sup>13</sup>C NMR** (150 MHz, CDCl<sub>3</sub>)  $\delta$  148.3, 148.1, 147.3, 129.8, 121.3, 108.2, 107.5, 101.6, 86.1, 81.1, 78.2, 70.3, 38.2, 19.8, 19.7, 12.3, 7.4 ppm. **IR** (KBr):  $\nu_{\max}$  = 3289, 2986, 1753, 1490, 1243, 1076, 814 cm<sup>-1</sup>. **HRMS** (ESI) ( $m/z$ ): Calcd for C<sub>17</sub>H<sub>16</sub>O<sub>5</sub>, [M+Na]<sup>+</sup>, 323.0890; found: 323.0883. **m.p.**: 176.2–178.1 °C.

### 1-(3,5-di-*tert*-butylphenyl)-2-(1-hydroxycyclopropyl)-2-methylpropan-1-one (19u)

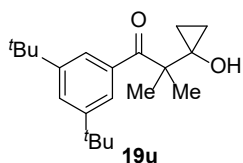

Purification by flash column chromatography on silica gel (petroleum ether/EtOAc = 5 : 1,  $R_f$  = 0.8) afforded **19u** as a light yellow solid. **<sup>1</sup>H NMR** (400 MHz, CDCl<sub>3</sub>)  $\delta$  7.64 (s, 2H), 7.55 (s, 1H), 3.04 (s, 1H), 1.35–1.30 (m, 24H), 0.85–0.78 (m, 4H) ppm. **<sup>13</sup>C NMR** (100 MHz, CDCl<sub>3</sub>)  $\delta$  210.1, 150.7, 138.3, 125.4, 122.2, 61.0, 51.4, 35.1, 31.6, 31.5, 23.4, 11.8 ppm. **IR** (KBr):  $\nu_{\max}$  = 3312, 2963, 1674, 1472, 1246, 758 cm<sup>-1</sup>. **HRMS** (ESI) ( $m/z$ ): Calcd for C<sub>21</sub>H<sub>32</sub>O<sub>2</sub>, [M+Na]<sup>+</sup>, 339.2295; found: 339.2284. **m.p.**: 56.2–58.1 °C.

### 7-(3,5-di-*tert*-butylphenyl)-7-ethynyl-8,8-dimethyl-4,6-dioxaspiro[2.5]octan-5-one (1u)

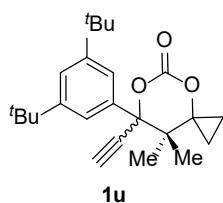

Purification by flash column chromatography on silica gel (petroleum ether/EtOAc = 5 : 1,  $R_f$  = 0.71) afforded **1u** as a white solid.  $^1\text{H NMR}$  (400 MHz,  $\text{CDCl}_3$ )  $\delta$  7.40 (s, 1H), 7.37 (d,  $J$  = 1.3 Hz, 2H), 2.87 (s, 1H), 1.32 (s, 18H), 1.27–1.20 (m, 2H), 0.96–0.87 (m, 7H), 0.73–0.67 (m, 1H) ppm.  $^{13}\text{C NMR}$  (100 MHz,  $\text{CDCl}_3$ )  $\delta$  150.0, 148.6, 134.8, 122.5, 121.7, 86.7, 81.3, 78.0, 70.2, 37.9, 35.0, 31.5, 19.8, 19.5, 12.1, 7.5 ppm. **IR** (KBr):  $\nu_{\text{max}}$  = 3275, 2962, 1759, 1266, 1071, 830  $\text{cm}^{-1}$ . **HRMS** (ESI) ( $m/z$ ): Calcd for  $\text{C}_{24}\text{H}_{32}\text{O}_3$ ,  $[\text{M}+\text{Na}]^+$ , 391.2244; found: 391.2226. **m.p.**: 187.4–199.2  $^\circ\text{C}$ .

### 2-(1-hydroxycyclopropyl)-2-methyl-1-(3,4,5-trimethoxyphenyl)propan-1-one (19v)

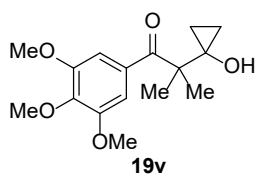

Purification by flash column chromatography on silica gel (petroleum ether/EtOAc = 5 : 1,  $R_f$  = 0.10) afforded **19v** as a yellow liquid.  $^1\text{H NMR}$  (400 MHz,  $\text{CDCl}_3$ )  $\delta$  7.16 (s, 2H), 3.87 (s, 9H), 2.97 (s, 1H), 1.26 (s, 6H), 0.88–0.81 (m, 4H) ppm.  $^{13}\text{C NMR}$  (100 MHz,  $\text{CDCl}_3$ )  $\delta$  206.8, 152.7, 141.0, 133.4, 106.1, 61.1, 61.0, 56.3, 51.5, 23.6, 12.4 ppm. **IR** (KBr):  $\nu_{\text{max}}$  = 3475, 3418, 3279, 1740, 1630, 1590, 1409, 1126  $\text{cm}^{-1}$ . **HRMS** (ESI) ( $m/z$ ): Calcd for  $\text{C}_{16}\text{H}_{22}\text{O}_5$ ,  $[\text{M}+\text{Na}]^+$ , 317.1359; found: 317.1358.

### 7-ethynyl-8,8-dimethyl-7-(3,4,5-trimethoxyphenyl)-4,6-dioxaspiro[2.5]octan-5-one (1v)

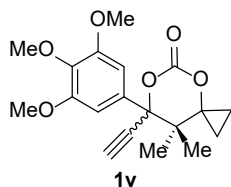

Purification by flash column chromatography on silica gel (petroleum ether/EtOAc = 3 : 1,  $R_f$  = 0.22) afforded **1v** as a light yellow solid.  $^1\text{H NMR}$  (400 MHz,  $\text{CDCl}_3$ )  $\delta$  6.77 (s, 2H), 3.87 (d,  $J$  = 3.7 Hz, 9H), 2.91 (s, 1H), 1.32–1.23 (m, 2H), 1.06–0.87 (m, 7H), 0.79–0.72 (m, 1H) ppm.  $^{13}\text{C NMR}$  (100 MHz,  $\text{CDCl}_3$ )  $\delta$  152.6, 148.3, 138.6, 131.3, 105.1, 86.1, 81.1, 78.3, 70.4, 61.0, 56.5, 38.2, 19.9, 19.8, 12.5, 7.5 ppm. **IR** (KBr):  $\nu_{\text{max}}$  = 3268, 2941, 1757, 1249, 1129, 1076  $\text{cm}^{-1}$ . **HRMS** (ESI) ( $m/z$ ): Calcd for  $\text{C}_{19}\text{H}_{22}\text{O}_6$ ,  $[\text{M}+\text{Na}]^+$ , 369.1309; found: 369.1307. **m.p.**:

194.6–196.3 °C.

### 2-(1-hydroxycyclopropyl)-2-methyl-1-(naphthalen-2-yl)propan-1-one (19w)

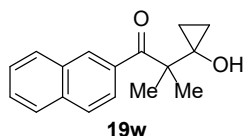

Purification by flash column chromatography on silica gel (petroleum ether/EtOAc = 5 : 1,  $R_f$  = 0.18) afforded **19w** as a light yellow solid.  $^1\text{H NMR}$  (400 MHz,  $\text{CDCl}_3$ )  $\delta$  8.32 (s, 1H), 7.91 (d,  $J$  = 7.9 Hz, 1H), 7.88–7.80 (m, 3H), 7.55 (dt,  $J$  = 19.0, 7.1 Hz, 2H), 3.14 (s, 1H), 1.35 (s, 6H), 0.88–0.81 (m, 4H) ppm.  $^{13}\text{C NMR}$  (100 MHz,  $\text{CDCl}_3$ )  $\delta$  209.5, 136.3, 134.5, 132.4, 129.2, 128.5, 128.0, 127.9, 127.8, 126.8, 124.7, 61.0, 51.7, 23.3, 11.8 ppm. **IR** (KBr):  $\nu_{\text{max}}$  = 3441, 3329, 2977, 1674, 1627, 1467, 1276  $\text{cm}^{-1}$ . **HRMS** (ESI) ( $m/z$ ): Calcd for  $\text{C}_{17}\text{H}_{18}\text{O}_2$ ,  $[\text{M}+\text{Na}]^+$ , 277.1199; found: 277.1188. **m.p.**: 78.3–79.1 °C.

### 7-ethynyl-8,8-dimethyl-7-(naphthalen-2-yl)-4,6-dioxaspiro[2.5]octan-5-one (1w)

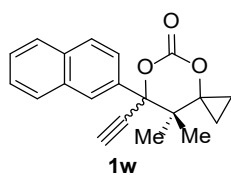

Purification by flash column chromatography on silica gel (petroleum ether/EtOAc = 5 : 1,  $R_f$  = 0.21) afforded **1w** as a light pink solid.  $^1\text{H NMR}$  (400 MHz,  $\text{CDCl}_3$ )  $\delta$  8.06 (s, 1H), 7.96–7.75 (m, 3H), 7.65 (d,  $J$  = 7.7 Hz, 1H), 7.59–7.42 (m, 2H), 2.95 (s, 1H), 1.34–1.23 (m, 2H), 0.99–0.83 (m, 7H), 0.77–0.69 (m, 1H) ppm.  $^{13}\text{C NMR}$  (100 MHz,  $\text{CDCl}_3$ )  $\delta$  148.4, 133.3, 133.1, 132.3, 128.5, 127.5, 127.3, 127.0, 126.8, 126.6, 124.6, 86.3, 81.0, 78.5, 70.3, 38.2, 19.8, 19.6, 12.2, 7.4 ppm. **IR** (KBr):  $\nu_{\text{max}}$  = 3289, 2983, 1754, 1273, 1079  $\text{cm}^{-1}$ . **HRMS** (ESI) ( $m/z$ ): Calcd for  $\text{C}_{20}\text{H}_{18}\text{O}_3$ ,  $[\text{M}+\text{Na}]^+$ , 329.1148; found: 329.1141. **m.p.**: 156.8–157.7 °C.

### 1-(2,3-dihydrobenzofuran-5-yl)-2-(1-hydroxycyclopropyl)-2-methylpropan-1-one (19x)

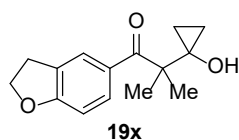

Purification by flash column chromatography on silica gel (petroleum ether/EtOAc = 5 : 1,  $R_f$  = 0.35) afforded **19x** as a light yellow solid.  $^1\text{H NMR}$  (400 MHz,  $\text{CDCl}_3$ )  $\delta$  7.79 (d,  $J$  = 7.4 Hz, 2H), 6.76 (d,  $J$  = 8.5 Hz, 1H), 4.62 (t,  $J$  = 8.7 Hz, 2H), 3.28–3.17 (m, 3H), 1.30 (s, 6H), 0.86–0.73 (m, 4H) ppm.  $^{13}\text{C NMR}$  (100 MHz,  $\text{CDCl}_3$ )  $\delta$  206.6, 163.2, 130.7, 130.3, 127.3, 126.3, 108.7, 72.1, 61.2, 51.1, 29.3, 23.7, 11.8 ppm. **IR** (KBr):  $\nu_{\text{max}}$  = 3320, 2978, 1659,

1627, 1241, 1098, 939  $\text{cm}^{-1}$ . **HRMS** (ESI) ( $m/z$ ): Calcd for  $\text{C}_{15}\text{H}_{18}\text{O}_3$ ,  $[\text{M}+\text{Na}]^+$ , 269.1148; found: 269.1147. **m.p.**: 47.2–49.8  $^{\circ}\text{C}$ .

### 7-(2,3-dihydrobenzofuran-5-yl)-7-ethynyl-8,8-dimethyl-4,6-dioxaspiro[2.5]octan-5-one (1x)

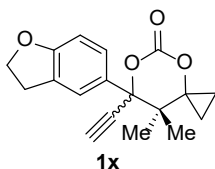

Purification by flash column chromatography on silica gel (petroleum ether/EtOAc = 5 : 1,  $R_f$  = 0.25) afforded **1x** as a white solid.  **$^1\text{H}$  NMR** (400 MHz,  $\text{CDCl}_3$ )  $\delta$  7.37 (s, 1H), 7.28 (d,  $J$  = 8.4 Hz, 1H), 6.74 (d,  $J$  = 8.4 Hz, 1H), 4.58 (t,  $J$  = 8.7 Hz, 2H), 3.21 (t,  $J$  = 8.7 Hz, 2H), 2.87 (s, 1H), 1.27–1.19 (m, 2H), 0.98–0.84 (m, 7H), 0.75–0.68 (m, 1H) ppm.  **$^{13}\text{C}$  NMR** (150 MHz,  $\text{CDCl}_3$ )  $\delta$  160.7, 148.6, 128.1, 127.8, 126.8, 124.0, 108.4, 86.4, 81.5, 78.1, 71.8, 70.3, 38.2, 29.8, 19.9, 19.7, 12.3, 7.5 ppm. **IR** (KBr):  $\nu_{\text{max}}$  = 3283, 2982, 2930, 1753, 1493, 1271, 1241, 1075  $\text{cm}^{-1}$ . **HRMS** (ESI) ( $m/z$ ): Calcd for  $\text{C}_{18}\text{H}_{18}\text{O}_4$ ,  $[\text{M}+\text{Na}]^+$ , 321.1097; found: 321.1094. **m.p.**: 182.5–184.6  $^{\circ}\text{C}$ .

### 1-(furan-3-yl)-2-(1-hydroxycyclopropyl)-2-methylpropan-1-one (19y)

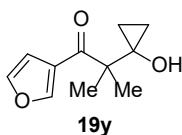

Purification by flash column chromatography on silica gel (petroleum ether/EtOAc = 5 : 1,  $R_f$  = 0.20) afforded **19y** as a light yellow oil.  **$^1\text{H}$  NMR** (400 MHz,  $\text{CDCl}_3$ )  $\delta$  8.11 (s, 1H), 7.40 (s, 1H), 6.82 (d,  $J$  = 1.2 Hz, 1H), 3.19 (s, 1H), 1.25 (s, 6H), 0.81–0.72 (m, 4H) ppm.  **$^{13}\text{C}$  NMR** (100 MHz,  $\text{CDCl}_3$ )  $\delta$  201.1, 147.1, 143.1, 125.2, 110.5, 60.5, 51.2, 23.0, 11.4 ppm. **IR** (KBr):  $\nu_{\text{max}}$  = 3311, 2980, 1658, 1463, 1285, 1239, 1023, 764  $\text{cm}^{-1}$ . **HRMS** (ESI) ( $m/z$ ): Calcd for  $\text{C}_{11}\text{H}_{14}\text{O}_3$ ,  $[\text{M}+\text{Na}]^+$ , 217.0835; found: 217.0826.

### 7-ethynyl-7-(furan-3-yl)-8,8-dimethyl-4,6-dioxaspiro[2.5]octan-5-one (1y)

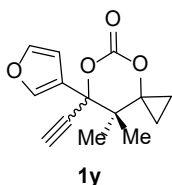

Purification by flash column chromatography on silica gel (petroleum ether/EtOAc = 5 : 1,  $R_f$  = 0.30) afforded **1y** as a light yellow solid.  **$^1\text{H}$  NMR** (400 MHz,  $\text{CDCl}_3$ )  $\delta$  7.52 (s, 1H), 7.39 (t,  $J$  = 1.8 Hz, 1H), 6.43 (s, 1H), 2.85 (s, 1H), 1.23–1.11 (m, 2H), 1.06 (s, 3H), 0.97–0.89 (m, 4H), 0.76–0.69 (m, 1H) ppm.  **$^{13}\text{C}$  NMR** (100 MHz,  $\text{CDCl}_3$ )  $\delta$

148.0, 143.1, 141.5, 123.3, 109.9, 82.3, 80.2, 77.6, 37.7, 19.7, 19.5, 11.8, 7.6 ppm. **IR** (KBr):  $\nu_{\max}$  = 3290, 2985, 1754, 1274  $\text{cm}^{-1}$ . **HRMS** (ESI) ( $m/z$ ): Calcd for  $\text{C}_{14}\text{H}_{14}\text{O}_4$ ,  $[\text{M}+\text{Na}]^+$ , 269.0784; found: 269.0789. **m.p.**: 90.6–93.2  $^{\circ}\text{C}$ .

### 2-(1-hydroxycyclopropyl)-2-methyl-1-(thiophen-3-yl)propan-1-one (19z)

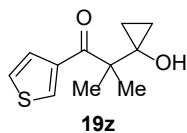

Purification by flash column chromatography on silica gel (petroleum ether/EtOAc = 5 : 1,  $R_f$  = 0.28) afforded **19z** as a light yellow solid.  **$^1\text{H}$  NMR** (400 MHz,  $\text{CDCl}_3$ )  $\delta$  8.11 (s, 1H), 7.55 (d,  $J$  = 5.1 Hz, 1H), 7.24 (dd,  $J$  = 4.7, 3.0 Hz, 1H), 3.37 (s, 1H), 1.25 (s, 6H), 0.81–0.72 (m, 4H) ppm.  **$^{13}\text{C}$  NMR** (100 MHz,  $\text{CDCl}_3$ )  $\delta$  201.0, 140.0, 131.8, 128.6, 125.1, 60.6, 51.1, 23.0, 11.7 ppm. **IR** (KBr):  $\nu_{\max}$  = 3328, 2980, 1660, 1234, 855  $\text{cm}^{-1}$ . **HRMS** (ESI) ( $m/z$ ): Calcd for  $\text{C}_{11}\text{H}_{14}\text{O}_2\text{S}$ ,  $[\text{M}+\text{Na}]^+$ , 233.0607; found: 233.0597. **m.p.**: 66.5–69.5  $^{\circ}\text{C}$ .

### 7-ethynyl-8,8-dimethyl-7-(thiophen-3-yl)-4,6-dioxaspiro[2.5]octan-5-one (1z)

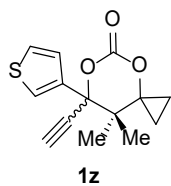

Purification by flash column chromatography on silica gel (petroleum ether/EtOAc = 5 : 1,  $R_f$  = 0.22) afforded **1z** as a light yellow solid.  **$^1\text{H}$  NMR** (400 MHz,  $\text{CDCl}_3$ )  $\delta$  7.45–7.35 (m, 1H), 7.29 (dd,  $J$  = 5.0, 3.1 Hz, 1H), 7.12 (d,  $J$  = 5.0 Hz, 1H), 2.88 (s, 1H), 1.24–1.16 (m, 2H), 0.99 (s, 3H), 0.96–0.89 (s, 4H), 0.73–0.67 (m, 1H) ppm.  **$^{13}\text{C}$  NMR** (100 MHz,  $\text{CDCl}_3$ )  $\delta$  148.1, 137.5, 127.0, 125.4, 124.3, 84.5, 80.7, 78.0, 70.0, 38.0, 19.8, 19.6, 11.9, 7.85 ppm. **IR** (KBr):  $\nu_{\max}$  = 3285, 2983, 1752, 1274, 1076  $\text{cm}^{-1}$ . **HRMS** (ESI) ( $m/z$ ): Calcd for  $\text{C}_{14}\text{H}_{14}\text{O}_3\text{S}$ ,  $[\text{M}+\text{Na}]^+$ , 285.0556; found: 285.05502. **m.p.**: 136.4–139.5  $^{\circ}\text{C}$

### 7-ethynyl-8,8-dimethyl-7-(thiophen-2-yl)-4,6-dioxaspiro[2.5]octan-5-one (19aa)

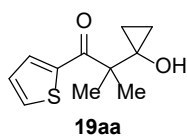

Purification by flash column chromatography on silica gel (petroleum ether/EtOAc = 10 : 1,  $R_f$  = 0.19) afforded **19aa** as a white solid.  **$^1\text{H}$  NMR** (400 MHz,  $\text{CDCl}_3$ )  $\delta$  7.89 (d,  $J$  = 3.8 Hz, 1H), 7.59 (d,  $J$  = 4.9 Hz, 1H), 7.11 (t,  $J$  = 4.4 Hz, 1H), 3.21 (s, 1H), 1.36 (s, 6H), 0.85–0.75 (m, 4H) ppm.  **$^{13}\text{C}$  NMR** (100 MHz,  $\text{CDCl}_3$ )  $\delta$  198.9, 142.8,

133.2, 132.5, 128.0, 60.8, 51.2, 23.5, 11.7 ppm. **IR** (KBr):  $\nu_{\max}$  = 3440, 2983, 2937, 1632, 1412, 1234, 1020, 743  $\text{cm}^{-1}$ . **HRMS** (ESI) (m/z): Calcd for  $\text{C}_{14}\text{H}_{14}\text{O}_3\text{S}$ ,  $[\text{M}+\text{Na}]^+$ , 233.0607; found: 233.0611. **m.p.**: 105.0–106.0 °C.

### 7-ethynyl-8,8-dimethyl-7-(thiophen-2-yl)-4,6-dioxaspiro[2.5]octan-5-one (1aa)

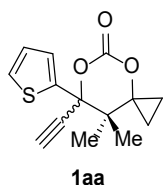

Purification by flash column chromatography on silica gel (petroleum ether/EtOAc = 10 : 1,  $R_f$  = 0.27) afforded **1aa** as a white solid.  **$^1\text{H}$  NMR** (400 MHz,  $\text{CDCl}_3$ )  $\delta$  7.34 (d,  $J$  = 5.1 Hz, 1H), 7.19 (d,  $J$  = 3.5 Hz, 1H), 7.01 (t,  $J$  = 4.3 Hz, 1H), 2.92 (s, 1H), 1.28–1.20 (m, 2H), 1.10 (s, 3H), 1.01 (s, 3H), 0.99–0.96 (m, 1H), 0.78–0.74 (m, 1H) ppm.  **$^{13}\text{C}$  NMR** (100 MHz,  $\text{CDCl}_3$ )  $\delta$  147.6, 139.5, 127.6, 126.5, 126.5, 84.7, 80.7, 78.3, 70.2, 38.5, 19.91, 19.89, 12.1, 7.8 ppm. **IR** (KBr):  $\nu_{\max}$  = 2983, 2117, 1754, 1273, 1073, 759  $\text{cm}^{-1}$ . **HRMS** (ESI) (m/z): Calcd for  $\text{C}_{14}\text{H}_{14}\text{O}_3\text{S}$ ,  $[\text{M}+\text{Na}]^+$ , 285.0556; found: 285.0551. **m.p.**: 86.0–87.0 °C.

### 2-(1-hydroxycyclopropyl)-2-methyl-1-(1-tosyl-1H-indol-3-yl)propan-1-one (19ab)

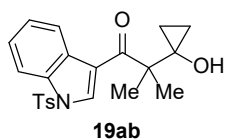

Purification by flash column chromatography on silica gel (petroleum ether/EtOAc = 4 : 1,  $R_f$  = 0.23) afforded **19ab** as a light yellow oil.  **$^1\text{H}$  NMR** (400 MHz,  $\text{CDCl}_3$ )  $\delta$  8.44 (s, 1H), 8.31 (d,  $J$  = 7.5 Hz, 1H), 7.93 (d,  $J$  = 7.8 Hz, 1H), 7.81 (d,  $J$  = 8.2 Hz, 2H), 7.38–7.30 (m, 2H), 7.26 (d,  $J$  = 8.1 Hz, 2H), 3.02 (s, 1H), 2.35 (s, 3H), 1.36 (s, 6H), 0.91–0.83 (m, 4H) ppm.  **$^{13}\text{C}$  NMR** (100 MHz,  $\text{CDCl}_3$ )  $\delta$  202.4, 146.0, 134.6, 134.2, 131.0, 130.3, 129.5, 127.2, 125.8, 124.9, 123.4, 118.5, 113.0, 61.0, 51.9, 23.7, 21.8, 12.0 ppm. **IR** (KBr):  $\nu_{\max}$  = 3330, 2980, 1660, 1375, 1268, 1175, 750  $\text{cm}^{-1}$ . **HRMS** (ESI) (m/z): Calcd for  $\text{C}_{22}\text{H}_{23}\text{NO}_4\text{S}$ ,  $[\text{M}+\text{Na}]^+$ , 420.1240; found: 420.1246.

### 7-ethynyl-8,8-dimethyl-7-(1-tosyl-1H-indol-3-yl)-4,6-dioxaspiro[2.5]octan-5-one (1ab)

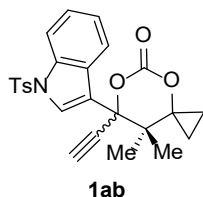

Purification by flash column chromatography on silica gel (petroleum ether/EtOAc = 4 : 1,  $R_f$  = 0.27) afforded **1ab** as a white solid.  **$^1\text{H}$  NMR** (400 MHz,  $\text{CDCl}_3$ )  $\delta$  7.98 (d,  $J$  = 8.4 Hz, 1H), 7.84–7.71 (m, 4H), 7.32 (t,  $J$  = 7.8 Hz,

1H), 7.26–7.21 (m, 3H), 2.96 (s, 1H), 2.34 (s, 3H), 1.34–1.24 (m, 2H), 1.09–0.93 (m, 7H), 0.79–0.72 (m, 1H) ppm. <sup>13</sup>C NMR (100 MHz, CDCl<sub>3</sub>) δ 148.0, 145.6, 135.0, 134.7, 130.2, 128.0, 127.1, 126.3, 125.0, 123.6, 122.3, 118.4, 113.6, 83.6, 80.1, 78.8, 70.2, 39.0, 21.7, 20.3, 20.0, 12.4, 7.3 ppm. IR (KBr): ν<sub>max</sub> = 3290, 2925, 1756, 1374, 1271, 1174, 746, 576 cm<sup>-1</sup>. HRMS (ESI) (m/z): Calcd for C<sub>25</sub>H<sub>23</sub>NO<sub>5</sub>S, [M+H]<sup>+</sup>, 450.1370; found: 450.1358. m.p.: 103.7–105.8 °C.

### 3-(1-hydroxycyclopropyl)-3-methylbutan-2-one (19ac)

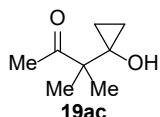

Purification by flash column chromatography on silica gel (petroleum ether/EtOAc = 5 : 1, R<sub>f</sub> = 0.25) afforded **19ac** as a light yellow oil. <sup>1</sup>H NMR (400 MHz, CDCl<sub>3</sub>) δ 3.42 (s, 1H), 2.17 (s, 3H), 0.99 (s, 6H), 0.70–0.61 (m, 4H) ppm. <sup>13</sup>C NMR (100 MHz, CDCl<sub>3</sub>) δ 214.7, 59.9, 51.0, 26.0, 21.4, 10.7 ppm. IR (KBr): ν<sub>max</sub> = 3331, 2979, 1704, 1468, 1357, 1260, 1234, 1124 cm<sup>-1</sup>. HRMS (ESI) (m/z): Calcd for C<sub>11</sub>H<sub>14</sub>O<sub>3</sub>, [M+Na]<sup>+</sup>, 165.0887; found: 165.0886.

### 7-ethynyl-7,8,8-trimethyl-4,6-dioxaspiro[2.5]octan-5-one (1ac)

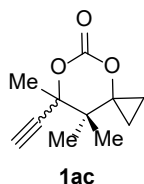

Purification by flash column chromatography on silica gel (petroleum ether/EtOAc = 5 : 1, R<sub>f</sub> = 0.29) afforded **1ac** as a white solid. <sup>1</sup>H NMR (400 MHz, CDCl<sub>3</sub>) δ 2.68 (s, 1H), 1.59 (s, 3H), 1.08–0.93 (m, 7H), 0.84–0.90 (m, 1H), 0.72–0.79 (m, 1H) ppm. <sup>13</sup>C NMR (100 MHz, CDCl<sub>3</sub>) δ 148.0, 82.5, 81.2, 76.5, 69.7, 36.2, 23.6, 19.8, 19.0, 10.9, 7.6 ppm. IR (KBr): ν<sub>max</sub> = 3270, 2984, 1753, 1282, 1250, 1070 cm<sup>-1</sup>. HRMS (ESI) (m/z): Calcd for C<sub>11</sub>H<sub>14</sub>O<sub>3</sub>, [M+Na]<sup>+</sup>, 217.0835; found: 217.0858. m.p.: 85.4–87.2 °C.

### (1-(1-hydroxycyclopropyl)cyclopentyl)(phenyl)methanone (19ad)

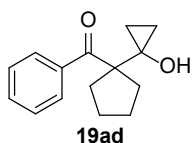

Purification by flash column chromatography on silica gel (petroleum ether/EtOAc = 10 : 1, R<sub>f</sub> = 0.18) afforded **19ad** as a light yellow solid. <sup>1</sup>H NMR (400 MHz, CDCl<sub>3</sub>) δ 7.78 (d, J = 7.2 Hz, 2H), 7.46 (t, J = 7.3 Hz, 1H), 7.39



(t,  $J = 7.4$  Hz, 2H), 2.79 (s, 1H), 2.37–2.27 (m, 2H), 1.68–1.56 (m, 6H), 0.83–0.73 (m, 4H) ppm  $^{13}\text{C}$  NMR (100 MHz,  $\text{CDCl}_3$ )  $\delta$  207.8, 138.6, 131.3, 128.3, 128.1, 63.7, 59.8, 34.1, 25.8, 13.0 ppm. IR (KBr):  $\nu_{\text{max}} = 3329, 2955, 2871, 1671, 1449, 1235, 1017, 701$   $\text{cm}^{-1}$ . HRMS (ESI) ( $m/z$ ): Calcd for  $\text{C}_{15}\text{H}_{18}\text{O}_2$ ,  $[\text{M}+\text{Na}]^+$ , 253.1199; found: 253.1189. m.p.: 56.1–57.2  $^{\circ}\text{C}$ .

#### 9-ethynyl-9-phenyl-10,12-dioxadispiro[2.0.4<sup>4</sup>.4<sup>3</sup>]dodecan-11-one (1ad)

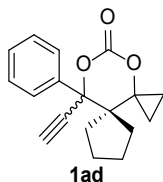

Purification by flash column chromatography on silica gel (petroleum ether/EtOAc = 10 : 1,  $R_f = 0.20$ ) afforded **1ad** as a light yellow solid.  $^1\text{H}$  NMR (400 MHz,  $\text{CDCl}_3$ )  $\delta$  7.62 (d,  $J = 6.5$  Hz, 2H), 7.38 (d,  $J = 5.7$  Hz, 3H), 2.85 (s, 1H), 2.08–2.01 (m, 2H), 1.62–1.55 (m, 1H), 1.42–1.37 (m, 2H), 1.30–1.15 (m, 4H), 0.99–0.83 (m, 2H), 0.70–0.64 (m, 1H) ppm.  $^{13}\text{C}$  NMR (100 MHz,  $\text{CDCl}_3$ )  $\delta$  148.9, 136.9, 129.0, 128.0, 127.4, 86.5, 81.9, 77.6, 69.8, 50.0, 31.9, 31.0, 26.5, 26.3, 12.2, 8.1 ppm. IR (KBr):  $\nu_{\text{max}} = 3290, 2960, 2875, 1755, 1267, 1065, 702$   $\text{cm}^{-1}$ . HRMS (ESI) ( $m/z$ ): Calcd for  $\text{C}_{18}\text{H}_{18}\text{O}_3$ ,  $[\text{M}+\text{Na}]^+$ , 305.1148; found: 305.1142. m.p.: 144.6–145.8  $^{\circ}\text{C}$ .

#### 4-(2-(1-hydroxycyclopropyl)-2-methylpropanoyl)phenyl (3aR,5aR,8aR,8bS)-2,2,7,7-tetramethyltetrahydro-3aH-bis([1,3]dioxolo)[4,5-b:4',5'-d]pyran-3a-carboxylate (19ae)

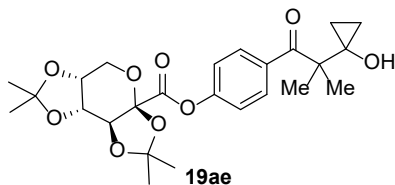

Purification by flash column chromatography on silica gel (petroleum ether/EtOAc = 3 : 1,  $R_f = 0.21$ ) afforded **19ae** as a colorless oil.  $^1\text{H}$  NMR (600 MHz,  $\text{CDCl}_3$ )  $\delta$  7.84 (d,  $J = 8.4$  Hz, 2H), 7.20 (d,  $J = 8.3$  Hz, 2H), 4.86 (d,  $J = 2.5$  Hz, 1H), 4.69 (dd,  $J = 7.9, 2.5$  Hz, 1H), 4.31 (d,  $J = 7.9$  Hz, 1H), 3.99–3.93 (m, 2H), 2.89 (s, 1H), 1.61 (s, 3H), 1.51 (s, 3H), 1.49 (s, 3H), 1.37 (s, 3H), 1.28 (s, 6H), 0.83–0.77 (m, 4H) ppm.  $^{13}\text{C}$  NMR (150 MHz,  $\text{CDCl}_3$ )  $\delta$  208.0, 166.5, 152.8, 136.8, 129.8, 121.2, 111.1, 109.7, 99.9, 73.0, 70.4, 70.1, 61.9, 61.0, 51.6, 26.3, 26.1, 24.7, 24.6, 23.2, 11.8 ppm. IR (KBr):  $\nu_{\text{max}} = 3308, 2989, 2937, 1767, 1676, 1383, 1253, 1164, 926$   $\text{cm}^{-1}$ . HRMS (ESI) ( $m/z$ ): Calcd for  $\text{C}_{25}\text{H}_{32}\text{O}_9$ ,  $[\text{M}+\text{Na}]^+$ , 499.1939; found: 499.1943.

#### 4-(7-ethynyl-8,8-dimethyl-5-oxo-4,6-dioxaspiro[2.5]octan-7-yl)phenyl (3aR,5aR,8aR,8bS)-2,2,7,7-tetramethyltetrahydro-3aH-bis([1,3]dioxolo)[4,5-b:4',5'-d]pyran-3a-carboxylate (1ae)

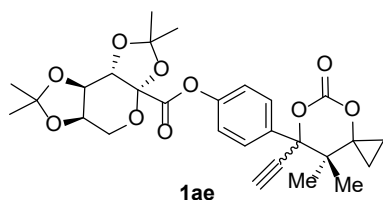

Purification by flash column chromatography on silica gel (petroleum ether/EtOAc = 3 : 1,  $R_f$  = 0.13) afforded **1ae** as a white solid. **<sup>1</sup>H NMR** (400 MHz, CDCl<sub>3</sub>)  $\delta$  7.58 (d,  $J$  = 8.5 Hz, 2H), 7.16 (d,  $J$  = 8.4 Hz, 2H), 4.84 (s, 1H), 4.67 (dd,  $J$  = 7.9, 2.6 Hz, 1H), 4.29 (d,  $J$  = 7.9 Hz, 1H), 3.98–3.90 (m, 2H), 2.90 (s, 1H), 1.59 (s, 3H), 1.48 (d,  $J$  = 6.3 Hz, 6H), 1.35 (s, 3H), 1.29–1.19 (m, 2H), 0.98–0.91 (m, 4H), 0.87 (s, 3H), 0.75–0.69 (m, 1H) ppm. **<sup>13</sup>C NMR** (100 MHz, CDCl<sub>3</sub>)  $\delta$  166.6, 166.6, 151.0, 148.1, 133.9, 128.6, 120.6, 111.0, 109.6, 99.8, 85.9, 80.8, 78.60, 73.0, 72.9, 70.4, 70.3, 70.0, 61.8, 38.1, 26.3, 26.1, 24.7, 24.5, 19.7, 19.5, 12.3, 7.4 ppm. **IR** (KBr):  $\nu_{\max}$  = 3293, 2989, 1760, 1506, 1252, 1074, 739 cm<sup>-1</sup>. **HRMS** (ESI) ( $m/z$ ): Calcd for C<sub>28</sub>H<sub>32</sub>O<sub>10</sub>, [M+Na]<sup>+</sup>, 551.1888; found: 551.1884. **m.p.**: 130.7–131.4 °C.

**4-(2-(1-hydroxycyclopropyl)-2-methylpropanoyl)phenyl (S)-2-(6-methoxynaphthalen-2-yl)propanoate (19af)**

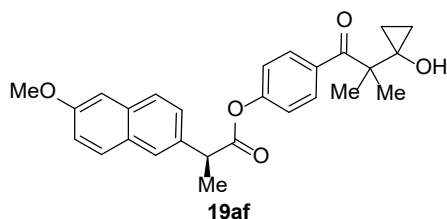

Purification by flash column chromatography on silica gel (petroleum ether/EtOAc = 5 : 1,  $R_f$  = 0.13) afforded **19af** as a white solid. **<sup>1</sup>H NMR** (400 MHz, CDCl<sub>3</sub>)  $\delta$  7.81–7.71 (m, 5H), 7.51 (d,  $J$  = 8.5 Hz, 1H), 7.19–7.15 (m, 2H), 7.06 (d,  $J$  = 8.4 Hz, 2H), 4.12 (q,  $J$  = 7.1 Hz, 1H), 3.91 (s, 3H), 3.08 (s, 1H), 1.71 (d,  $J$  = 7.2 Hz, 3H), 1.24 (s, 6H), 0.82–0.74 (m, 4H) ppm. **<sup>13</sup>C NMR** (100 MHz, CDCl<sub>3</sub>)  $\delta$  207.8, 172.8, 157.8, 153.0, 136.1, 134.9, 133.9, 129.6, 129.4, 129.0, 127.5, 126.2, 126.1, 121.2, 119.3, 105.7, 60.8, 55.4, 51.4, 45.6, 23.1, 18.5, 11.8 ppm. **IR** (KBr):  $\nu_{\max}$  = 3330, 2979, 1755, 1675, 1603, 1266, 1165, 978, 853 cm<sup>-1</sup>. **HRMS** (ESI) ( $m/z$ ): Calcd for C<sub>27</sub>H<sub>28</sub>O<sub>5</sub>, [M+Na]<sup>+</sup>, 455.1829; found: 455.1830. **m.p.**: 99.4–100.7 °C.

**4-(7-ethynyl-8,8-dimethyl-5-oxo-4,6-dioxaspiro[2.5]octan-7-yl)phenyl (2S)-2-(6-methoxynaphthalen-2-yl)propanoate (1af)**

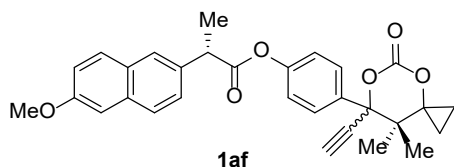

Purification by flash column chromatography on silica gel (petroleum ether/EtOAc = 5 : 1,  $R_f$  = 0.11) afforded **1af** as a white solid.  $^1\text{H NMR}$  (400 MHz,  $\text{CDCl}_3$ )  $\delta$  7.77–7.73 (m, 3H), 7.53–7.48 (m, 3H), 7.18–7.14 (m, 2H), 7.04 (d,  $J$  = 8.3 Hz, 2H), 4.11 (q,  $J$  = 7.1 Hz, 1H), 3.92 (s, 3H), 2.87 (s, 1H), 1.70 (d,  $J$  = 7.1 Hz, 3H), 1.31–1.19 (m, 2H), 0.99–0.92 (m, 4H), 0.86 (s, 3H), 0.75–0.68 (m, 1H) ppm.  $^{13}\text{C NMR}$  (100 MHz,  $\text{CDCl}_3$ )  $\delta$  173.1, 157.9, 151.3, 148.2, 135.0, 134.0, 133.4, 129.4, 129.1, 128.5, 127.6, 126.3, 126.2, 120.8, 119.3, 105.8, 85.9, 80.9, 78.5, 70.3, 55.5, 45.7, 38.1, 19.7, 19.6, 18.6, 12.3, 7.5 ppm. **IR** (KBr):  $\nu_{\text{max}}$  = 3290, 2985, 1755, 1603, 1505, 1268, 1170, 1076, 739  $\text{cm}^{-1}$ . **HRMS** (ESI) ( $m/z$ ): Calcd for  $\text{C}_{30}\text{H}_{28}\text{O}_6$ ,  $[\text{M}+\text{Na}]^+$ , 507.1778; found: 507.1773. **m.p.**: 176.2–178.7  $^\circ\text{C}$ .

**4-(2-(1-hydroxycyclopropyl)-2-methylpropanoyl)phenyl 2-(1-(4-chlorobenzoyl)-5-methoxy-2-methyl-1H-indol-3-yl)acetate (19ag)**

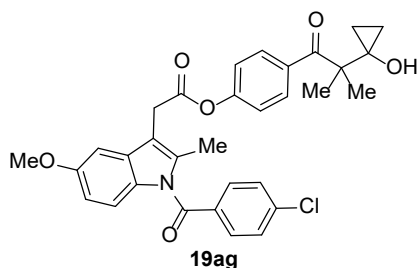

Purification by flash column chromatography on silica gel (petroleum ether/EtOAc = 3 : 1,  $R_f$  = 0.13) afforded **19ag** as a yellow solid.  $^1\text{H NMR}$  (400 MHz,  $\text{CDCl}_3$ )  $\delta$  7.82 (d,  $J$  = 8.4 Hz, 2H), 7.68 (d,  $J$  = 6.6 Hz, 2H), 7.48 (d,  $J$  = 6.6 Hz, 2H), 7.13 (d,  $J$  = 8.5 Hz, 2H), 7.05 (s, 1H), 6.89 (d,  $J$  = 10.5 Hz, 1H), 6.70 (d,  $J$  = 9.0 Hz, 1H), 3.92 (s, 2H), 3.84 (s, 3H), 2.95 (s, 1H), 2.46 (s, 3H), 1.26 (s, 6H), 0.84–0.76 (m, 4H) ppm.  $^{13}\text{C NMR}$  (100 MHz,  $\text{CDCl}_3$ )  $\delta$  207.9, 169.0, 168.4, 156.3, 152.8, 139.5, 136.5, 133.9, 131.3, 131.0, 130.5, 129.7, 129.3, 121.3, 115.2, 111.9, 111.8, 101.3, 60.9, 55.9, 51.5, 30.7, 23.2, 13.6, 11.9 ppm. **IR** (KBr):  $\nu_{\text{max}}$  = 3301, 3058, 2980, 1755, 1681, 1478, 1320, 1222, 754, 555  $\text{cm}^{-1}$ . **HRMS** (ESI) ( $m/z$ ): Calcd for  $\text{C}_{32}\text{H}_{30}\text{ClNO}_6$ ,  $[\text{M}+\text{H}]^+$ , 560.1834; found: 560.1834. **m.p.**: 59.8–61.5  $^\circ\text{C}$ .

**4-(7-ethynyl-8,8-dimethyl-5-oxo-4,6-dioxaspiro[2.5]octan-7-yl)phenyl 2-(1-(4-chlorobenzoyl)-5-methoxy-2-methyl-1H-indol-3-yl)acetate (1ag)**

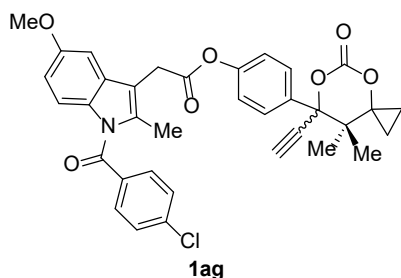

Purification by flash column chromatography on silica gel (petroleum ether/EtOAc = 3 : 1,  $R_f$  = 0.13) afforded **1ag** as a white solid.  $^1\text{H NMR}$  (600 MHz,  $\text{CDCl}_3$ )  $\delta$  7.68 (d,  $J$  = 8.5 Hz, 2H), 7.58–7.54 (m, 2H), 7.48 (d,  $J$  = 8.4 Hz, 2H), 7.11 (d,  $J$  = 8.8 Hz, 2H), 7.05 (d,  $J$  = 2.5 Hz, 1H), 6.89 (d,  $J$  = 9.0 Hz, 1H), 6.70 (dd,  $J$  = 9.0, 2.5 Hz, 1H), 3.92 (s, 2H), 3.84 (s, 3H), 2.89 (s, 1H), 2.46 (s, 3H), 1.30–1.22 (m, 2H), 0.99–0.94 (m, 4H), 0.88 (s, 3H), 0.75–0.71 (m, 1H) ppm.  $^{13}\text{C NMR}$  (150 MHz,  $\text{CDCl}_3$ )  $\delta$  169.1, 168.4, 156.3, 151.2, 148.2, 139.5, 136.4, 133.9, 133.7, 131.3, 131.0, 130.6, 129.3, 128.6, 120.8, 115.2, 111.9, 101.4, 85.9, 80.9, 78.5, 70.3, 55.9, 38.1, 30.7, 19.7, 19.6, 13.6, 12.3, 7.5 ppm. **IR** (KBr):  $\nu_{\text{max}}$  = 3439, 2985, 1756, 1682, 1505, 1265, 1220, 1073, 754  $\text{cm}^{-1}$ . **HRMS** (ESI) ( $m/z$ ): Calcd for  $\text{C}_{35}\text{H}_{30}\text{ClNO}_7$ ,  $[\text{M}+\text{Na}]^+$ , 634.1603; found: 634.1601. **m.p.**: 93.4–95.9  $^\circ\text{C}$ .

#### 2-(1-hydroxy-2-(4-methoxybenzyl)cyclopropyl)-2-methyl-1-phenylpropan-1-one (**19ah**)

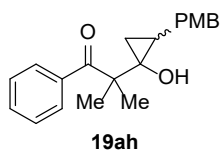

Purification by flash column chromatography on silica gel (petroleum ether/EtOAc = 5 : 1,  $R_f$  = 0.26) afforded **19ah** as a colorless oil.  $^1\text{H NMR}$  (600 MHz,  $\text{CDCl}_3$ )  $\delta$  7.75 (d,  $J$  = 7.9 Hz, 2H), 7.48 (t,  $J$  = 7.3 Hz, 1H), 7.41 (t,  $J$  = 7.5 Hz, 2H), 7.15 (d,  $J$  = 8.1 Hz, 2H), 6.85 (d,  $J$  = 8.1 Hz, 2H), 3.80 (s, 3H), 2.95 (dd,  $J$  = 14.6, 4.3 Hz, 1H), 2.85 (s, 1H), 2.45 (dd,  $J$  = 14.6, 10.5 Hz, 1H), 1.47–1.43 (m, 4H), 1.41 (s, 3H), 1.08 (dd,  $J$  = 10.5, 5.9 Hz, 1H), 0.86 (t,  $J$  = 6.8 Hz, 1H) ppm.  $^{13}\text{C NMR}$  (150 MHz,  $\text{CDCl}_3$ )  $\delta$  209.3, 158.1, 139.1, 133.8, 131.1, 129.2, 128.3, 128.0, 114.0, 63.8, 55.4, 52.2, 34.3, 30.0, 25.1, 23.7, 19.0 ppm. **IR** (KBr):  $\nu_{\text{max}}$  = 3483, 2928, 1677, 1512, 1248, 1035, 744  $\text{cm}^{-1}$ . **HRMS** (ESI) ( $m/z$ ): Calcd for  $\text{C}_{21}\text{H}_{24}\text{O}_3$ ,  $[\text{M}+\text{Na}]^+$ , 347.1618; found: 347.1619.

#### 7-ethynyl-1-(4-methoxybenzyl)-8,8-dimethyl-7-phenyl-4,6-dioxaspiro[2.5]octan-5-one (**1ah**)

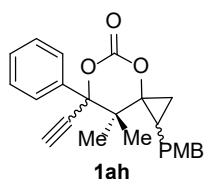

Purification by flash column chromatography on silica gel (petroleum ether/EtOAc = 5 : 1,  $R_f$  = 0.29) afforded **1ah**

as a white solid.  $^1\text{H NMR}$  (600 MHz,  $\text{CDCl}_3$ )  $\delta$  7.60–7.57 (m, 4H), 7.42–7.38 (m, 6H), 7.13 (dd,  $J = 18.9, 8.2$  Hz, 4H), 6.85 (dd,  $J = 12.9, 8.3$  Hz, 4H), 3.79 (d,  $J = 8.2$  Hz, 6H), 3.35 (dd,  $J = 14.3, 3.3$  Hz, 1H), 2.95 (s, 1H), 2.89 (s, 1H), 2.77 (dd,  $J = 14.7, 5.0$  Hz, 1H), 2.56–2.46 (m, 2H), 1.80–1.70 (m, 1H), 1.63–1.59 (m, 1H), 1.50 (dd,  $J = 11.2, 7.0$  Hz, 1H), 1.23–1.19 (m, 2H), 1.16 (d,  $J = 9.4$  Hz, 6H), 1.07 (s, 3H), 1.02 (s, 3H), 0.68–0.65 (m, 1H) ppm.  $^{13}\text{C NMR}$  (150 MHz,  $\text{CDCl}_3$ )  $\delta$  158.33, 158.32, 148.4, 148.2, 136.2, 135.5, 132.9, 132.5, 129.2, 129.1, 129.02, 129.00, 127.9, 127.8, 127.5, 114.2, 114.1, 86.5, 86.4, 82.0, 81.2, 78.2, 77.7, 73.2, 73.0, 55.41, 55.38, 40.9, 39.0, 35.4, 33.4, 29.4, 25.7, 21.4, 21.2, 19.2, 18.5, 16.0 ppm. **IR** (KBr):  $\nu_{\text{max}} = 2960, 2935, 2355, 1751, 1511, 1264, 761$   $\text{cm}^{-1}$ . **HRMS** (ESI) ( $m/z$ ): Calcd for  $\text{C}_{24}\text{H}_{24}\text{O}_4$ ,  $[\text{M}+\text{Na}]^+$ , 399.1567; found: 399.1567. **m.p.**: 134.4–136.1  $^\circ\text{C}$ .

### 2-ethyl-2-(1-hydroxycyclopropyl)-1-phenylbutan-1-one (19ai)

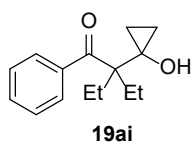

Purification by flash column chromatography on silica gel (petroleum ether/EtOAc = 5 : 1,  $R_f = 0.43$ ) afforded **19ai** as a yellow oily liquid.  $^1\text{H NMR}$  (600 MHz,  $\text{CDCl}_3$ )  $\delta$  7.75 (d,  $J = 7.4$  Hz, 2H), 7.45 (t,  $J = 7.3$  Hz, 1H), 7.39 (t,  $J = 7.5$  Hz, 2H), 2.28 (s, 1H), 1.74–1.68 (m, 2H), 1.67–1.62 (m, 2H), 0.91 (t,  $J = 7.5$  Hz, 6H), 0.86–0.83 (m, 2H), 0.78–0.75 (m, 2H) ppm.  $^{13}\text{C NMR}$  (150 MHz,  $\text{CDCl}_3$ )  $\delta$  208.6, 140.7, 130.7, 128.2, 127.5, 58.7, 57.9, 25.4, 12.3, 9.2 ppm. **IR** (KBr):  $\nu_{\text{max}} = 3470, 2969, 1644, 1268, 754$   $\text{cm}^{-1}$ . **HRMS** (ESI) ( $m/z$ ): Calcd for  $\text{C}_{15}\text{H}_{20}\text{O}_2$ ,  $[\text{M}+\text{H}]^+$ , 233.1536; found: 233.1539.

### 8,8-diethyl-7-ethynyl-7-phenyl-4,6-dioxaspiro[2.5]octan-5-one (1ai)

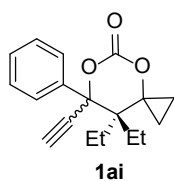

Purification by flash column chromatography on silica gel (petroleum ether/EtOAc = 5 : 1,  $R_f = 0.38$ ) afforded **1ai** as a colorless oil.  $^1\text{H NMR}$  (400 MHz,  $\text{CDCl}_3$ )  $\delta$  7.59 (dd,  $J = 6.5, 3.2$  Hz, 2H), 7.42–7.32 (m, 3H), 2.93 (s, 1H), 1.96 (dq,  $J = 14.9, 7.4$  Hz, 1H), 1.60–1.51 (m, 1H), 1.41 (dt,  $J = 15.1, 7.6$  Hz, 1H), 1.23 (dt,  $J = 14.2, 7.1$  Hz, 1H), 1.12–0.93 (m, 6H), 0.78–0.72 (m, 1H), 0.60 (t,  $J = 7.5$  Hz, 3H) ppm.  $^{13}\text{C NMR}$  (100 MHz,  $\text{CDCl}_3$ )  $\delta$  148.7, 136.9, 129.1, 128.0, 127.7, 88.5, 82.1, 79.0, 67.0, 42.1, 22.1, 20.8, 9.2, 9.2, 8.7, 8.5 ppm. **IR** (KBr):  $\nu_{\text{max}} = 3256, 2960, 1755, 1269, 1066, 757$   $\text{cm}^{-1}$ . **HRMS** (ESI) ( $m/z$ ): Calcd for  $\text{C}_{18}\text{H}_{20}\text{O}_3$ ,  $[\text{M}+\text{H}]^+$ , 285.1485; found: 285.1488.

### (1-(1-hydroxycyclopropyl)cyclohexyl)(phenyl)methanone (**19aj**)

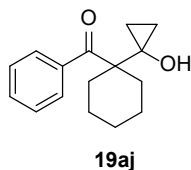

Purification by flash column chromatography on silica gel (petroleum ether/EtOAc = 5 : 1,  $R_f$  = 0.28) afforded **19aj** as a white solid.  $^1\text{H NMR}$  (400 MHz,  $\text{CDCl}_3$ )  $\delta$  7.77 (d,  $J$  = 7.1 Hz, 2H), 7.50–7.30 (m, 3H), 2.43–2.26 (m, 3H), 1.65–1.53 (m, 3H), 1.31–1.19 (m, 2H), 1.15–1.01 (m, 3H), 0.93–0.81 (m, 4H) ppm.  $^{13}\text{C NMR}$  (100 MHz,  $\text{CDCl}_3$ )  $\delta$  208.7, 140.6, 130.6, 128.1, 127.3, 61.9, 55.3, 31.5, 25.9, 23.2, 12.8 ppm. **IR** (KBr):  $\nu_{\text{max}}$  = 3413, 2923, 1626, 1454, 1229, 616  $\text{cm}^{-1}$ . **HRMS** (ESI) ( $m/z$ ): Calcd for  $\text{C}_{16}\text{H}_{20}\text{O}_2$ ,  $[\text{M}+\text{Na}]^+$ , 267.1356; found: 267.1357. **m.p.**: 72.5–73.9  $^\circ\text{C}$ .

### 10-ethynyl-10-phenyl-11,13-dioxadispiro[2.0.5<sup>4</sup>.4<sup>3</sup>]tridecan-12-one (**1aj**)

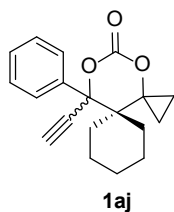

Purification by flash column chromatography on silica gel (petroleum ether/EtOAc = 5 : 1,  $R_f$  = 0.40) afforded **1aj** as a white solid.  $^1\text{H NMR}$  (400 MHz,  $\text{CDCl}_3$ )  $\delta$  7.59–7.53 (m, 2H), 7.40–7.33 (m, 3H), 2.89 (s, 1H), 1.80–1.73 (m, 1H), 1.68–1.59 (m, 1H), 1.57–1.45 (m, 3H), 1.44–1.37 (m, 1H), 1.35–1.25 (m, 3H), 1.23–1.00 (m, 4H), 0.99–0.87 (m, 1H) ppm.  $^{13}\text{C NMR}$  (100 MHz,  $\text{CDCl}_3$ )  $\delta$  148.7, 136.4, 128.9, 128.3, 127.6, 88.4, 81.7, 78.6, 68.2, 39.2, 27.5, 27.0, 24.5, 21.4, 20.5, 11.7, 10.5 ppm. **IR** (KBr):  $\nu_{\text{max}}$  = 3417, 2943, 2865, 1754, 1271, 1070, 755  $\text{cm}^{-1}$ . **HRMS** (ESI) ( $m/z$ ): Calcd for  $\text{C}_{19}\text{H}_{20}\text{O}_3$ ,  $[\text{M}+\text{H}]^+$ , 297.1485; found: 297.1488. **m.p.**: 124.4–126.8  $^\circ\text{C}$ .

### 2-(1-hydroxycyclopropyl)-1-phenylethan-1-one (**19ak**)

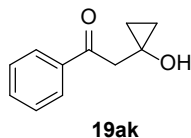

Purification by flash column chromatography on silica gel (petroleum ether/EtOAc = 5 : 1,  $R_f$  = 0.40) afforded **19ak** as a white solid.  $^1\text{H NMR}$  (400 MHz,  $\text{CDCl}_3$ )  $\delta$  7.92 (d,  $J$  = 7.7 Hz, 2H), 7.57 (t,  $J$  = 7.3 Hz, 1H), 7.45 (t,  $J$  = 7.6 Hz, 2H), 4.01 (s, 1H), 3.24 (s, 2H), 0.96–0.85 (m, 2H), 0.55–0.42 (m, 2H) ppm.  $^{13}\text{C NMR}$  (100 MHz,  $\text{CDCl}_3$ )  $\delta$  200.8, 136.5, 133.7, 128.8, 128.1, 52.2, 46.1, 12.9 ppm. **IR** (KBr):  $\nu_{\text{max}}$  = 3007, 1677, 1597, 1450, 1284, 1213,

979, 731  $\text{cm}^{-1}$ . **HRMS** (ESI) (m/z): Calcd for  $\text{C}_{11}\text{H}_{12}\text{O}_2$ ,  $[\text{M}+\text{Na}]^+$ , 199.0731; found: 199.0730. **m.p.**: 37.0–38.2  $^{\circ}\text{C}$ .

### 7-ethynyl-7-phenyl-4,6-dioxaspiro[2.5]octan-5-one (**1ak**)

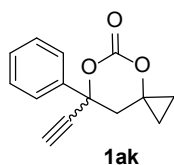

Purification by flash column chromatography on silica gel (petroleum ether/EtOAc = 5 : 1,  $R_f$  = 0.27) afforded **1ak** as a yellow oil.  **$^1\text{H NMR}$**  (400 MHz,  $\text{CDCl}_3$ )  $\delta$  7.59 (d,  $J$  = 7.7 Hz, 2H), 7.45–7.34 (m, 3H), 2.90 (s, 1H), 2.75 (dd,  $J$  = 14.4, 1.6 Hz, 1H), 2.21 (d,  $J$  = 14.4 Hz, 1H), 1.38–1.32 (m, 1H), 1.14–1.01 (m, 2H), 0.69–0.62 (m, 1H) ppm.  **$^{13}\text{C NMR}$**  (100 MHz,  $\text{CDCl}_3$ )  $\delta$  148.5, 139.5, 129.2, 128.8, 125.0, 81.2, 79.6, 77.9, 61.6, 41.6, 13.5, 9.8 ppm. **IR** (KBr):  $\nu_{\text{max}}$  = 3418, 1753, 1295, 1218, 1059, 752  $\text{cm}^{-1}$ . **HRMS** (ESI) (m/z): Calcd for  $\text{C}_{14}\text{H}_{12}\text{O}_3$ ,  $[\text{M}+\text{Na}]^+$ , 251.0679; found: 251.0684.

### 3-(1-hydroxycyclopropyl)-3-methyl-1-phenylbutan-2-one (**19al**)

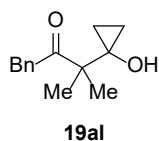

Purification by flash column chromatography on silica gel (petroleum ether/EtOAc = 5 : 1,  $R_f$  = 0.37) afforded **19al** as a colorless liquid.  **$^1\text{H NMR}$**  (400 MHz,  $\text{CDCl}_3$ )  $\delta$  7.33 (t,  $J$  = 7.3 Hz, 2H), 7.26 (t,  $J$  = 7.2 Hz, 1H), 7.21 (d,  $J$  = 7.3 Hz, 2H), 3.93 (s, 2H), 3.01 (s, 1H), 1.14 (s, 6H), 0.81–0.73 (m, 4H) ppm.  **$^{13}\text{C NMR}$**  (100 MHz,  $\text{CDCl}_3$ )  $\delta$  213.3, 134.7, 129.8, 128.4, 126.7, 60.1, 51.4, 44.4, 21.6, 10.8 ppm. **IR** (KBr):  $\nu_{\text{max}}$  = 3470, 2980, 1712, 1455, 1246, 1049, 702  $\text{cm}^{-1}$ . **HRMS** (ESI) (m/z): Calcd for  $\text{C}_{14}\text{H}_{18}\text{O}_2$ ,  $[\text{M}+\text{H}]^+$ , 219.1380; found: 219.1371.

### 7-benzyl-7-ethynyl-8,8-dimethyl-4,6-dioxaspiro[2.5]octan-5-one (**1al**)

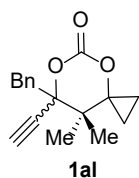

Purification by flash column chromatography on silica gel (petroleum ether/EtOAc = 5 : 1,  $R_f$  = 0.27) afforded **1al** as a white solid.  **$^1\text{H NMR}$**  (400 MHz,  $\text{CDCl}_3$ )  $\delta$  7.46–7.16 (m, 5H), 3.24 (d,  $J$  = 13.9 Hz, 1H), 2.92 (d,  $J$  = 13.9 Hz, 1H), 2.62 (s, 1H), 1.24 (s, 3H), 1.17–1.01 (m, 5H), 0.98–0.91 (m, 1H), 0.87–0.82 (m, 1H) ppm.  **$^{13}\text{C NMR}$**  (100 MHz,  $\text{CDCl}_3$ )  $\delta$  147.7, 134.1, 131.1, 127.8, 127.0, 85.1, 79.3, 79.0, 69.9, 41.2, 36.8, 20.0, 19.3, 11.1, 7.8 ppm. **IR**

(KBr):  $\nu_{\max}$  = 3417, 2980, 1751, 1276, 1071, 697  $\text{cm}^{-1}$ . **HRMS** (ESI) (m/z): Calcd for  $\text{C}_{17}\text{H}_{18}\text{O}_3$ ,  $[\text{M}+\text{Na}]^+$ , 293.1148; found: 293.1155. **m.p.**: 155.9–157.4  $^{\circ}\text{C}$ .

### 2-(1-hydroxycyclopropyl)-2-methylheptan-3-one (19am)

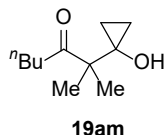

Purification by flash column chromatography on silica gel (petroleum ether/EtOAc = 5 : 1,  $R_f$  = 0.48) afforded **19am** as a colorless liquid.  **$^1\text{H}$  NMR** (400 MHz,  $\text{CDCl}_3$ )  $\delta$  3.19 (s, 1H), 2.53 (t,  $J$  = 7.3 Hz, 2H), 1.51 (p,  $J$  = 7.4 Hz, 2H), 1.26 (h,  $J$  = 7.4 Hz, 2H), 1.02 (d,  $J$  = 1.8 Hz, 6H), 0.86 (t,  $J$  = 7.4 Hz, 3H), 0.70–0.59 (m, 4H) ppm.  **$^{13}\text{C}$  NMR** (100 MHz,  $\text{CDCl}_3$ )  $\delta$  216.6, 60.0, 50.8, 37.5, 25.9, 22.4, 21.6, 14.0, 10.6 ppm. **IR** (KBr):  $\nu_{\max}$  = 3476, 2962, 2872, 1702, 1246, 1048  $\text{cm}^{-1}$ . **HRMS** (ESI) (m/z): Calcd for  $\text{C}_{11}\text{H}_{20}\text{O}_2$ ,  $[\text{M}+\text{H}]^+$ , 185.1536; found: 185.1535.

### 7-butyl-7-ethynyl-8,8-dimethyl-4,6-dioxaspiro[2.5]octan-5-one (1am)

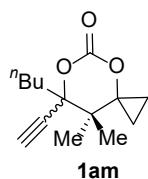

Purification by flash column chromatography on silica gel (petroleum ether/EtOAc = 5 : 1,  $R_f$  = 0.41) afforded **1am** as a white solid.  **$^1\text{H}$  NMR** (400 MHz,  $\text{CDCl}_3$ )  $\delta$  2.68 (s, 1H), 1.85–1.76 (m, 1H), 1.70–1.58 (m, 3H), 1.37–1.26 (m, 2H), 1.14–0.99 (m, 5H), 0.96 (s, 3H), 0.91–0.85 (m, 4H), 0.79–0.73 (m, 1H) ppm.  **$^{13}\text{C}$  NMR** (100 MHz,  $\text{CDCl}_3$ )  $\delta$  148.2, 85.6, 79.8, 77.8, 70.0, 36.7, 34.9, 25.7, 22.7, 20.0, 19.3, 14.0, 11.2, 7.6 ppm. **IR** (KBr):  $\nu_{\max}$  = 3418, 2960, 1753, 1277, 1068, 753  $\text{cm}^{-1}$ . **HRMS** (ESI) (m/z): Calcd for  $\text{C}_{14}\text{H}_{20}\text{O}_3$ ,  $[\text{M}+\text{H}]^+$ , 237.1485; found: 237.1490. **m.p.**: 101.1–102.7  $^{\circ}\text{C}$ .

## 8. Crystallographic Data

Crystallographic data for the structures reported in this article have been deposited at the Cambridge Crystallographic Data Centre under deposition numbers CCDC 2321372 (**2n**), CCDC 2321378 (**2af**), CCDC 2321373 (**2ah**), and CCDC 2321374 (**L12**). Copies of the data can be obtained free of charge via [https://www.ccdc.cam.ac.uk/data\\_request/cif](https://www.ccdc.cam.ac.uk/data_request/cif).



## 8.1 Crystallographic data of 2n

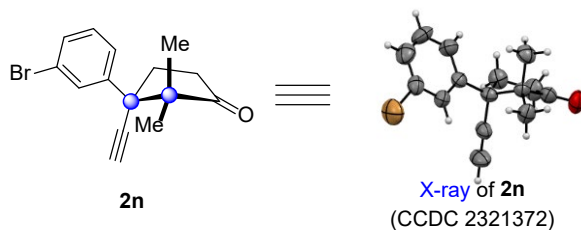

|                                             |                                                               |
|---------------------------------------------|---------------------------------------------------------------|
| Identification code                         | <b>2n</b>                                                     |
| Empirical formula                           | C <sub>15</sub> H <sub>15</sub> BrO                           |
| Formula weight                              | 291.18                                                        |
| Temperature/K                               | 293(2)                                                        |
| Crystal system                              | orthorhombic                                                  |
| Space group                                 | P2 <sub>1</sub> 2 <sub>1</sub> 2 <sub>1</sub>                 |
| a/Å                                         | 9.0877(6)                                                     |
| b/Å                                         | 10.7172(12)                                                   |
| c/Å                                         | 14.3707(11)                                                   |
| α/°                                         | 90                                                            |
| β/°                                         | 90                                                            |
| γ/°                                         | 90                                                            |
| Volume/Å <sup>3</sup>                       | 1399.6(2)                                                     |
| Z                                           | 4                                                             |
| ρ <sub>calc</sub> /cm <sup>3</sup>          | 1.382                                                         |
| μ/mm <sup>-1</sup>                          | 2.919                                                         |
| F(000)                                      | 592.0                                                         |
| Crystal size/mm <sup>3</sup>                | 0.32 × 0.3 × 0.28                                             |
| Radiation                                   | Mo Kα (λ = 0.71073)                                           |
| 2θ range for data collection/°              | 4.742 to 58.178                                               |
| Index ranges                                | -9 ≤ h ≤ 12, -10 ≤ k ≤ 14, -18 ≤ l ≤ 18                       |
| Reflections collected                       | 5784                                                          |
| Independent reflections                     | 3195 [R <sub>int</sub> = 0.0288, R <sub>sigma</sub> = 0.0611] |
| Data/restraints/parameters                  | 3195/0/156                                                    |
| Goodness-of-fit on F <sup>2</sup>           | 1.016                                                         |
| Final R indexes [I ≥ 2σ (I)]                | R <sub>1</sub> = 0.0565, wR <sub>2</sub> = 0.1135             |
| Final R indexes [all data]                  | R <sub>1</sub> = 0.1258, wR <sub>2</sub> = 0.1420             |
| Largest diff. peak/hole / e Å <sup>-3</sup> | 0.62/-0.49                                                    |
| Flack parameter                             | -0.006(9)                                                     |

## 8.2 Crystallographic data of 2af

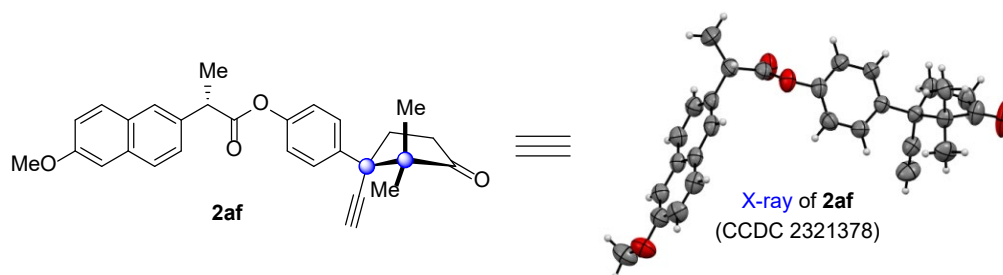

|                                             |                                                               |
|---------------------------------------------|---------------------------------------------------------------|
| Identification code                         | <b>2af</b>                                                    |
| Empirical formula                           | C <sub>29</sub> H <sub>28</sub> O <sub>4</sub>                |
| Formula weight                              | 440.51                                                        |
| Temperature/K                               | 293(2)                                                        |
| Crystal system                              | monoclinic                                                    |
| Space group                                 | P2 <sub>1</sub>                                               |
| a/Å                                         | 12.4747(4)                                                    |
| b/Å                                         | 6.58280(10)                                                   |
| c/Å                                         | 15.4889(4)                                                    |
| α/°                                         | 90                                                            |
| β/°                                         | 110.054(3)                                                    |
| γ/°                                         | 90                                                            |
| Volume/Å <sup>3</sup>                       | 1194.81(6)                                                    |
| Z                                           | 2                                                             |
| ρ <sub>calc</sub> /cm <sup>3</sup>          | 1.224                                                         |
| μ/mm <sup>-1</sup>                          | 0.643                                                         |
| F(000)                                      | 468.0                                                         |
| Crystal size/mm <sup>3</sup>                | 0.34 × 0.26 × 0.24                                            |
| Radiation                                   | Cu Kα (λ = 1.54184)                                           |
| 2θ range for data collection/°              | 6.074 to 141.076                                              |
| Index ranges                                | -15 ≤ h ≤ 15, -8 ≤ k ≤ 8, -18 ≤ l ≤ 18                        |
| Reflections collected                       | 20099                                                         |
| Independent reflections                     | 4544 [R <sub>int</sub> = 0.0311, R <sub>sigma</sub> = 0.0196] |
| Data/restraints/parameters                  | 4544/1/302                                                    |
| Goodness-of-fit on F <sup>2</sup>           | 1.039                                                         |
| Final R indexes [I >= 2σ (I)]               | R <sub>1</sub> = 0.0364, wR <sub>2</sub> = 0.0964             |
| Final R indexes [all data]                  | R <sub>1</sub> = 0.0387, wR <sub>2</sub> = 0.0999             |
| Largest diff. peak/hole / e Å <sup>-3</sup> | 0.18/-0.17                                                    |
| Flack parameter                             | -0.06(8)                                                      |

### 8.3 Crystallographic data of 2ah

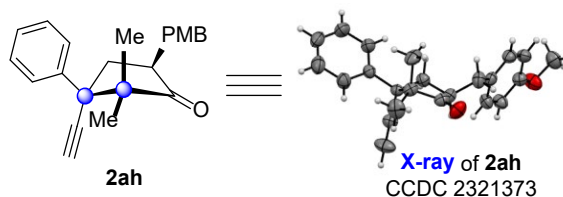

|                                             |                                                               |
|---------------------------------------------|---------------------------------------------------------------|
| Identification code                         | <b>2ah</b>                                                    |
| Empirical formula                           | C <sub>23</sub> H <sub>24</sub> O <sub>2</sub>                |
| Formula weight                              | 332.42                                                        |
| Temperature/K                               | 293                                                           |
| Crystal system                              | orthorhombic                                                  |
| Space group                                 | P2 <sub>1</sub> 2 <sub>1</sub> 2 <sub>1</sub>                 |
| a/Å                                         | 6.6478(3)                                                     |
| b/Å                                         | 10.5086(5)                                                    |
| c/Å                                         | 26.9042(15)                                                   |
| α/°                                         | 90                                                            |
| β/°                                         | 90                                                            |
| γ/°                                         | 90                                                            |
| Volume/Å <sup>3</sup>                       | 1879.50(16)                                                   |
| Z                                           | 4                                                             |
| ρ <sub>calc</sub> /cm <sup>3</sup>          | 1.175                                                         |
| μ/mm <sup>-1</sup>                          | 0.073                                                         |
| F(000)                                      | 712.0                                                         |
| Crystal size/mm <sup>3</sup>                | 0.31 × 0.27 × 0.22                                            |
| Radiation                                   | Mo Kα (λ = 0.71073)                                           |
| 2θ range for data collection/°              | 6.836 to 57.732                                               |
| Index ranges                                | -8 ≤ h ≤ 8, -8 ≤ k ≤ 14, -33 ≤ l ≤ 33                         |
| Reflections collected                       | 6986                                                          |
| Independent reflections                     | 4231 [R <sub>int</sub> = 0.0309, R <sub>sigma</sub> = 0.0591] |
| Data/restraints/parameters                  | 4231/0/229                                                    |
| Goodness-of-fit on F <sup>2</sup>           | 1.065                                                         |
| Final R indexes [I >= 2σ (I)]               | R <sub>1</sub> = 0.0556, wR <sub>2</sub> = 0.1219             |
| Final R indexes [all data]                  | R <sub>1</sub> = 0.0800, wR <sub>2</sub> = 0.1392             |
| Largest diff. peak/hole / e Å <sup>-3</sup> | 0.18/-0.17                                                    |
| Flack parameter                             | -1.3(10)                                                      |

## 8.4 Crystallographic data of L12

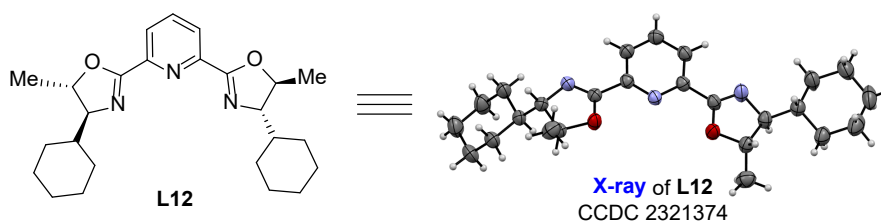

|                                             |                                                               |
|---------------------------------------------|---------------------------------------------------------------|
| Identification code                         | <b>L12</b>                                                    |
| Empirical formula                           | C <sub>25</sub> H <sub>35</sub> N <sub>3</sub> O <sub>2</sub> |
| Formula weight                              | 409.56                                                        |
| Temperature/K                               | 293(2)                                                        |
| Crystal system                              | monoclinic                                                    |
| Space group                                 | P2 <sub>1</sub>                                               |
| a/Å                                         | 6.5199(3)                                                     |
| b/Å                                         | 8.9739(5)                                                     |
| c/Å                                         | 19.7834(10)                                                   |
| α/°                                         | 90                                                            |
| β/°                                         | 96.520(5)                                                     |
| γ/°                                         | 90                                                            |
| Volume/Å <sup>3</sup>                       | 1150.02(10)                                                   |
| Z                                           | 2                                                             |
| ρ <sub>calc</sub> /g/cm <sup>3</sup>        | 1.183                                                         |
| μ/mm <sup>-1</sup>                          | 0.075                                                         |
| F(000)                                      | 444.0                                                         |
| Crystal size/mm <sup>3</sup>                | 0.31 × 0.28 × 0.25                                            |
| Radiation                                   | Mo Kα (λ = 0.71073)                                           |
| 2θ range for data collection/°              | 6.842 to 58.346                                               |
| Index ranges                                | -8 ≤ h ≤ 8, -11 ≤ k ≤ 11, -25 ≤ l ≤ 24                        |
| Reflections collected                       | 16343                                                         |
| Independent reflections                     | 5469 [R <sub>int</sub> = 0.0352, R <sub>sigma</sub> = 0.0444] |
| Data/restraints/parameters                  | 5469/1/273                                                    |
| Goodness-of-fit on F <sup>2</sup>           | 1.141                                                         |
| Final R indexes [I ≥ 2σ (I)]                | R <sub>1</sub> = 0.0498, wR <sub>2</sub> = 0.1328             |
| Final R indexes [all data]                  | R <sub>1</sub> = 0.0748, wR <sub>2</sub> = 0.1471             |
| Largest diff. peak/hole / e Å <sup>-3</sup> | 0.16/-0.20                                                    |
| Flack parameter                             | 0.3(6)                                                        |

## 9. References

[1] L. Fang, G. Trigiante, C. J. Kousseff, R. Crespo-Otero, M. P. Philpottb, and M. Watkinson, *Chem. Commun.*,

2018, **54**, 9619–9622.

[2] W.-Y. Lu, Y. Wang, Y. You, Z.-H. Wang, J.-Q. Zhao, M.-Q. Zhou, and W.-C. Yuan, *J. Org. Chem.*, 2001, **86**, 1779–1788.

[3] S. Nicolai, and J. Waser, *Angew. Chem. Int. Ed.*, 2022, **61**, e202209006.

[4] F. Benedetti, F. Berti, G. Garau, I. Martinuzzi, and S. Norbedo, *Eur. J. Org. Chem.*, 2003, **2003**, 1973–1982.

[5] A. E. Shemet, and M. Carreira, *Org. Lett.*, 2007, **19**, 5529–5532.

[6] Z. Zhou, and M. B. Andrus, *Tetrahedron Lett.*, 2012, **53**, 4518–4521.

[7] P. L. Bayless, and C. R. Hauser, *J. Am. Chem. Soc.*, 1954, **76**, 2306–2308.

[8] W.-X. Wei, Y. Li, Y.-T. Wen, M. Li, X.-S. Li, C.-T. Wang, H.-C. Liu, Y. Xia, B.-S. Zhang, R.-Q. Jiao, and Y.-M. Liang, *J. Am. Chem. Soc.*, 2021, **143**, 7868–7875.

## 10. NMR Spectra

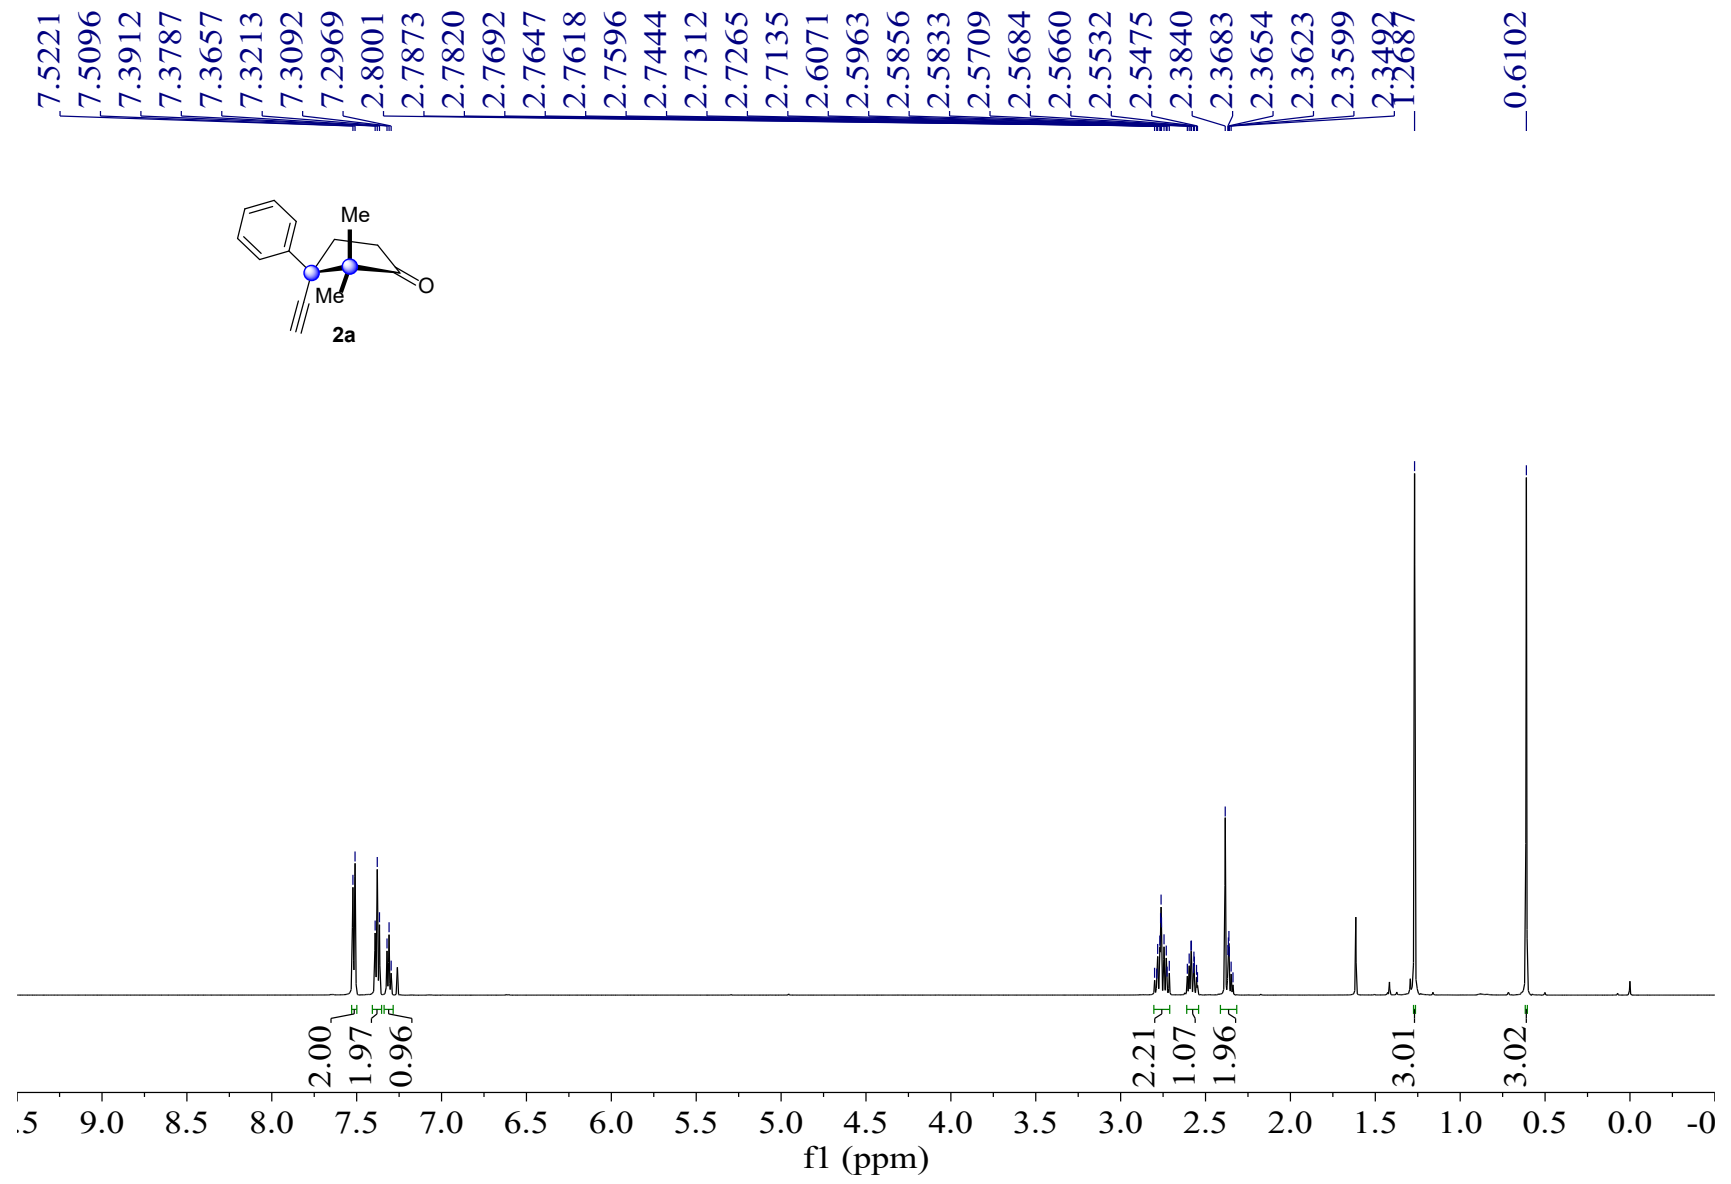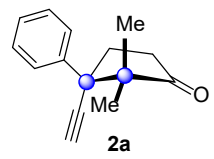

<sup>1</sup>H NMR spectrum of compound **2a**

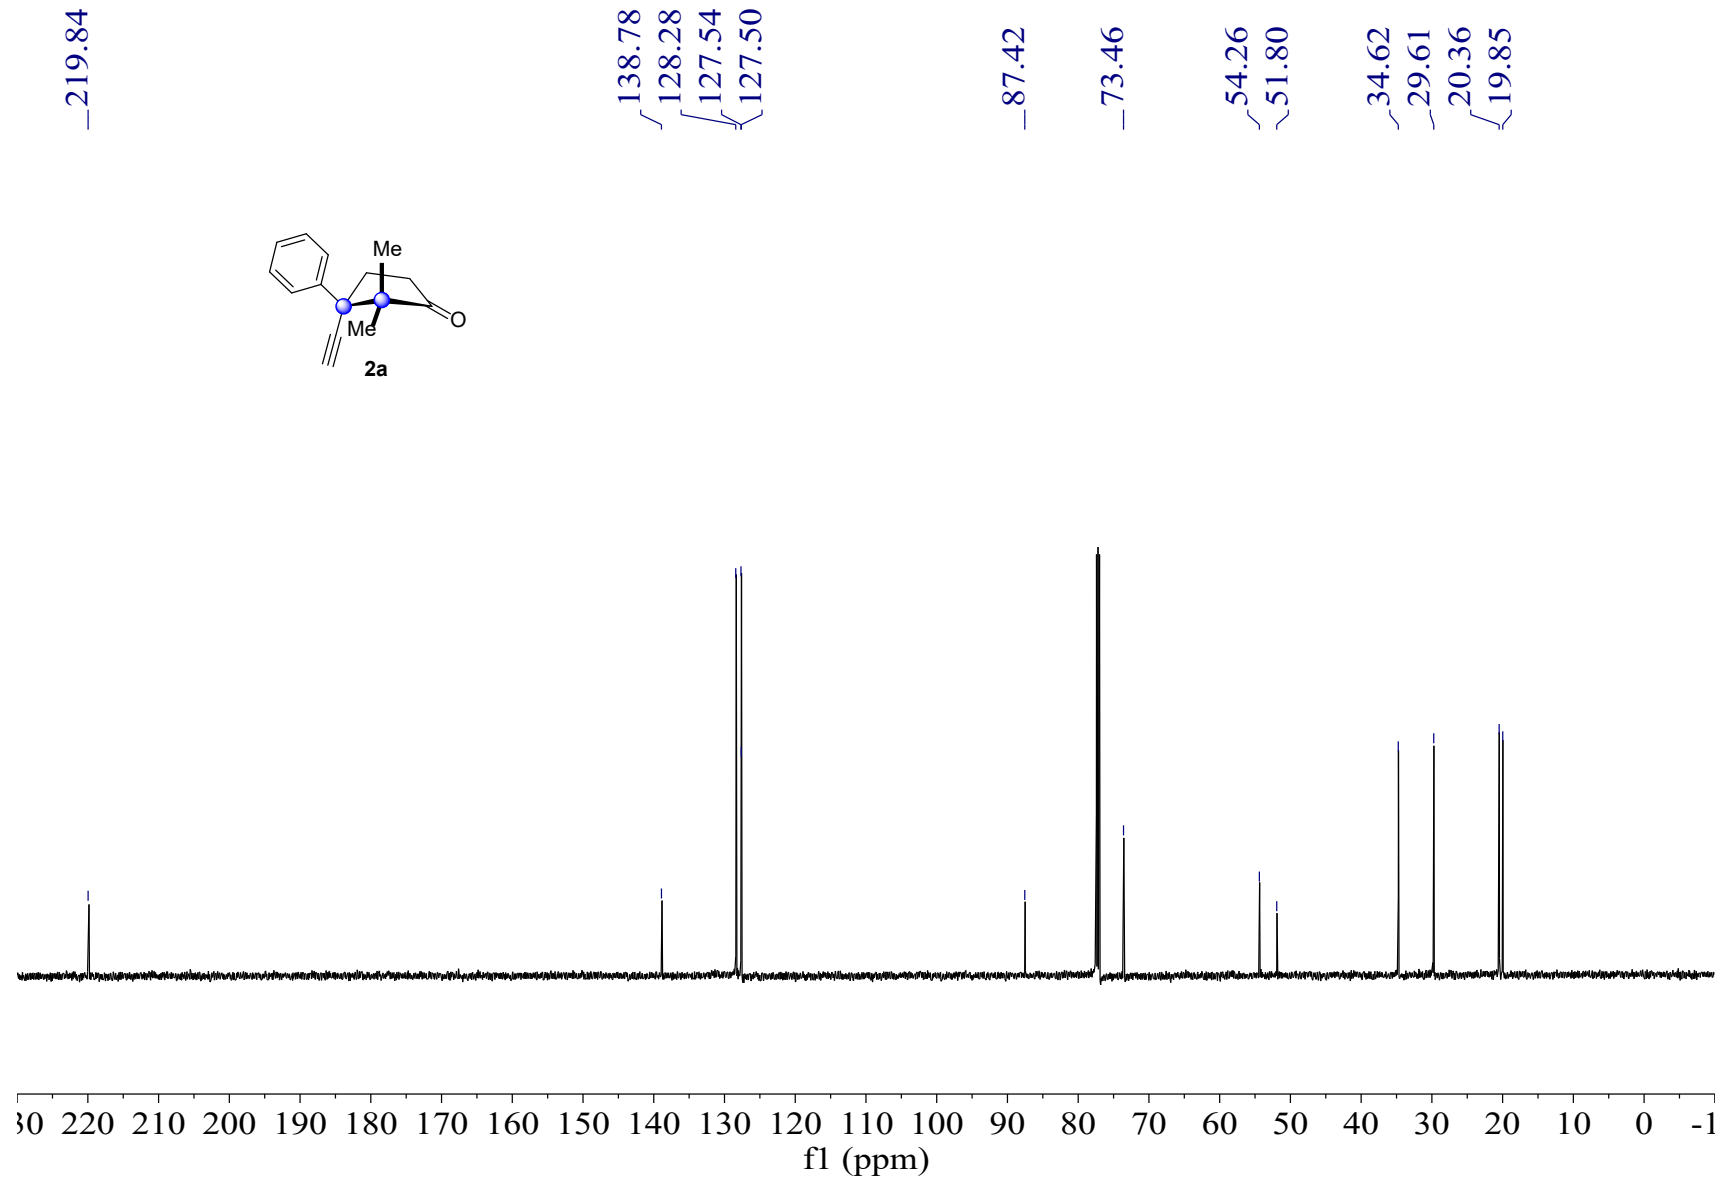

$^{13}\text{C}$  NMR spectrum of compound **2a**

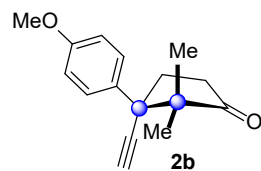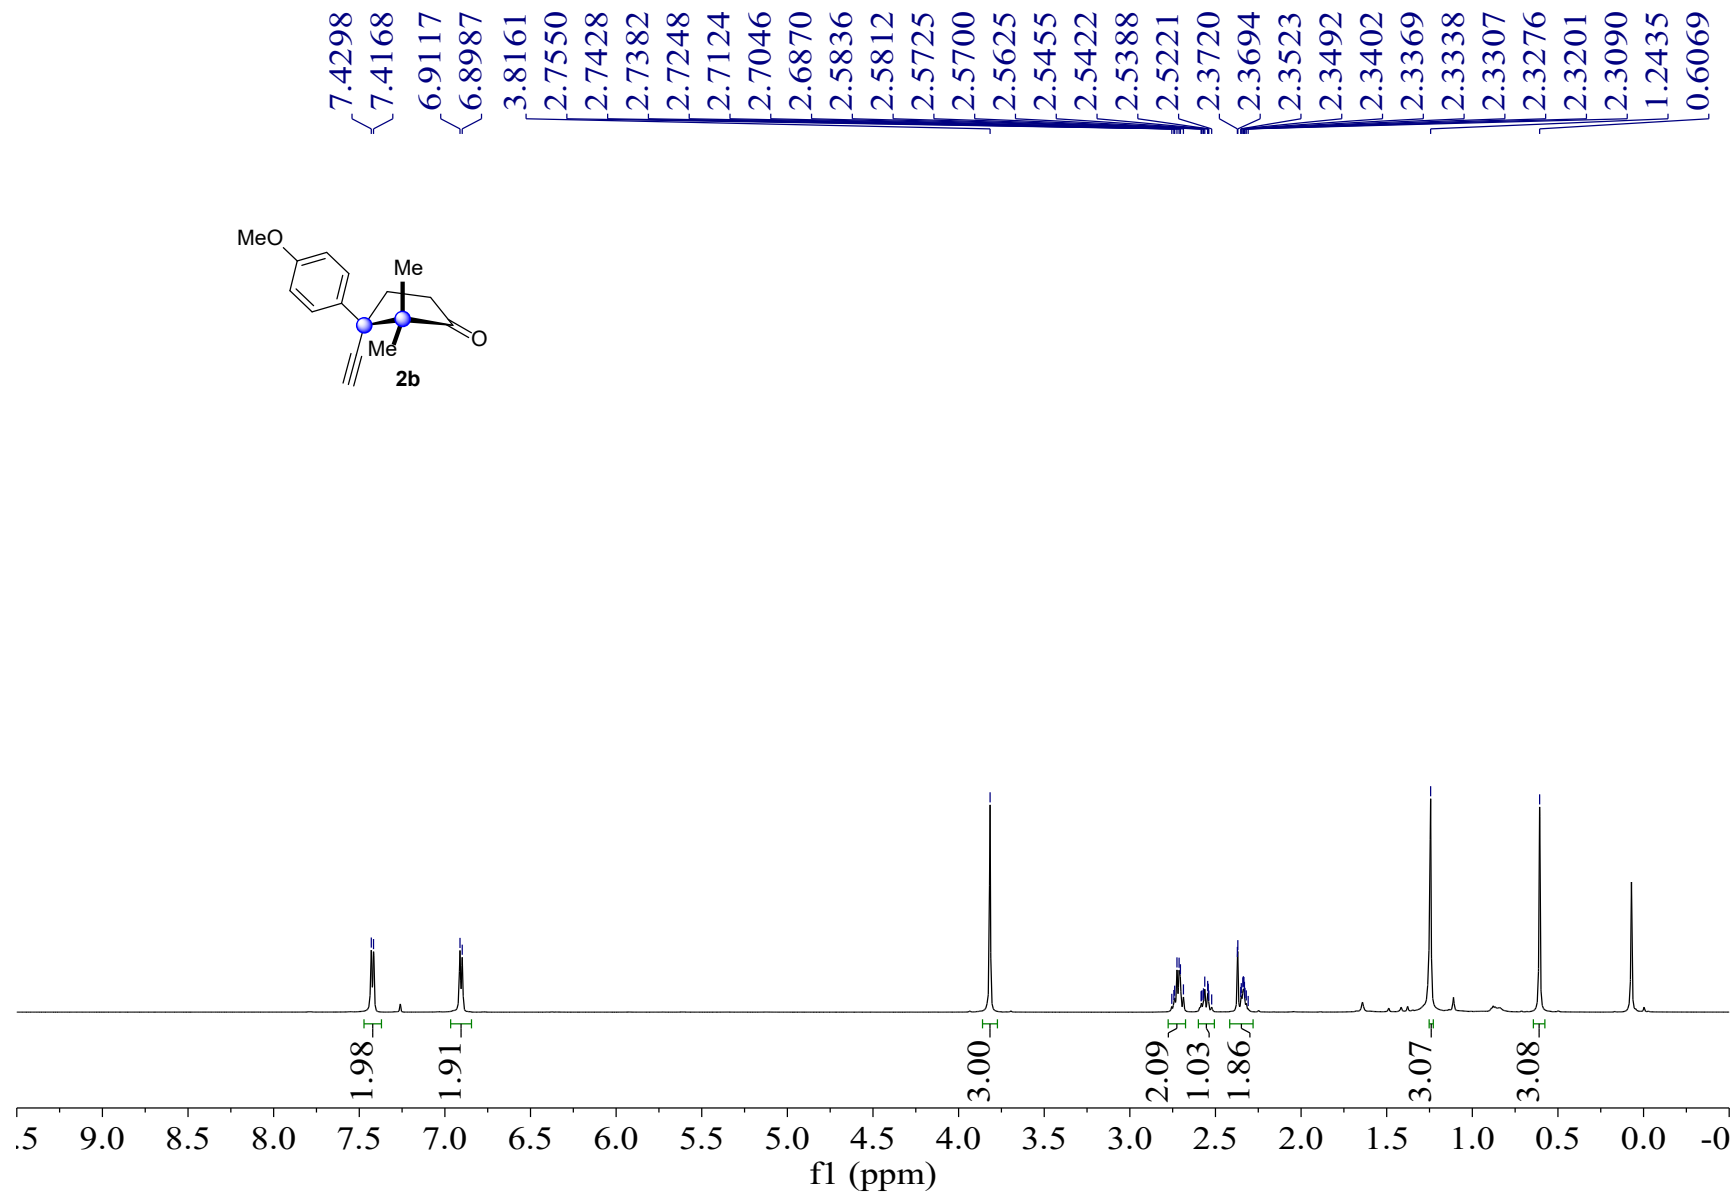

$^1\text{H}$  NMR spectrum of compound **2b**



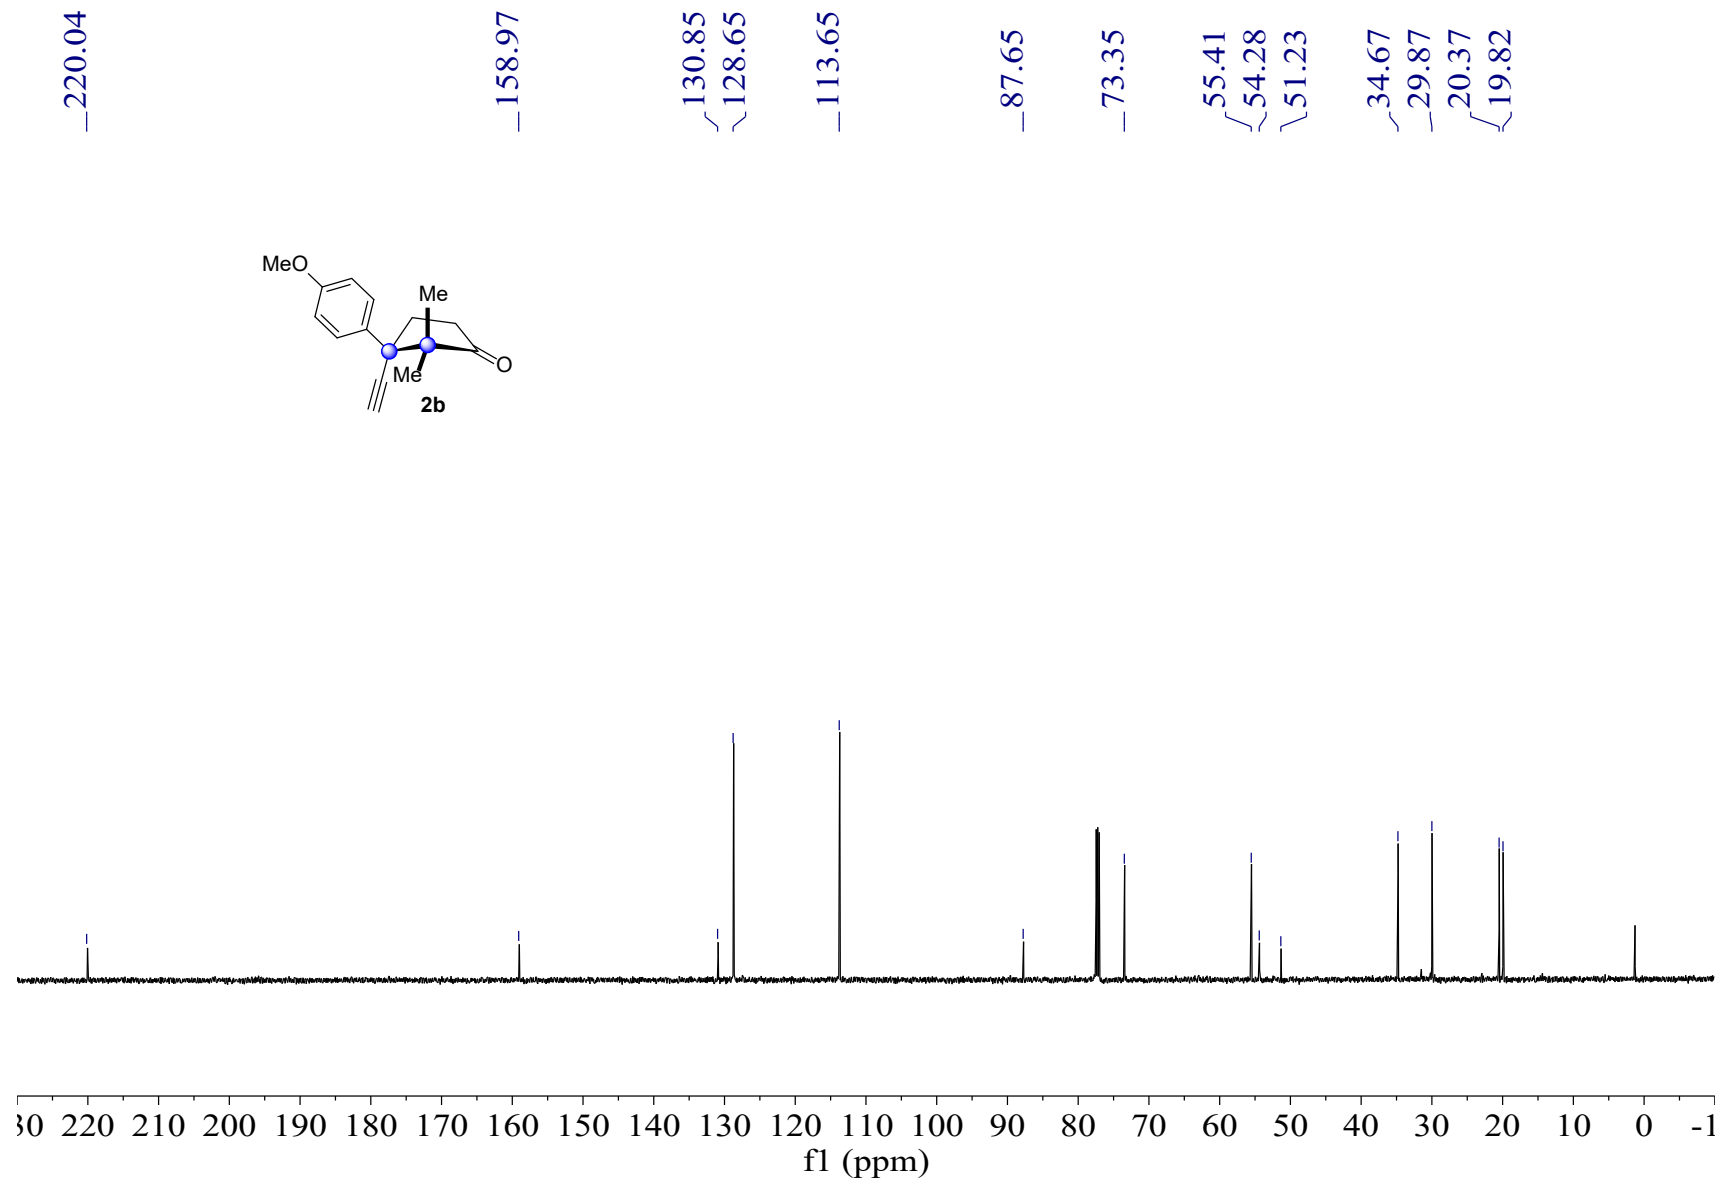

<sup>13</sup>C NMR spectrum of compound **2b**

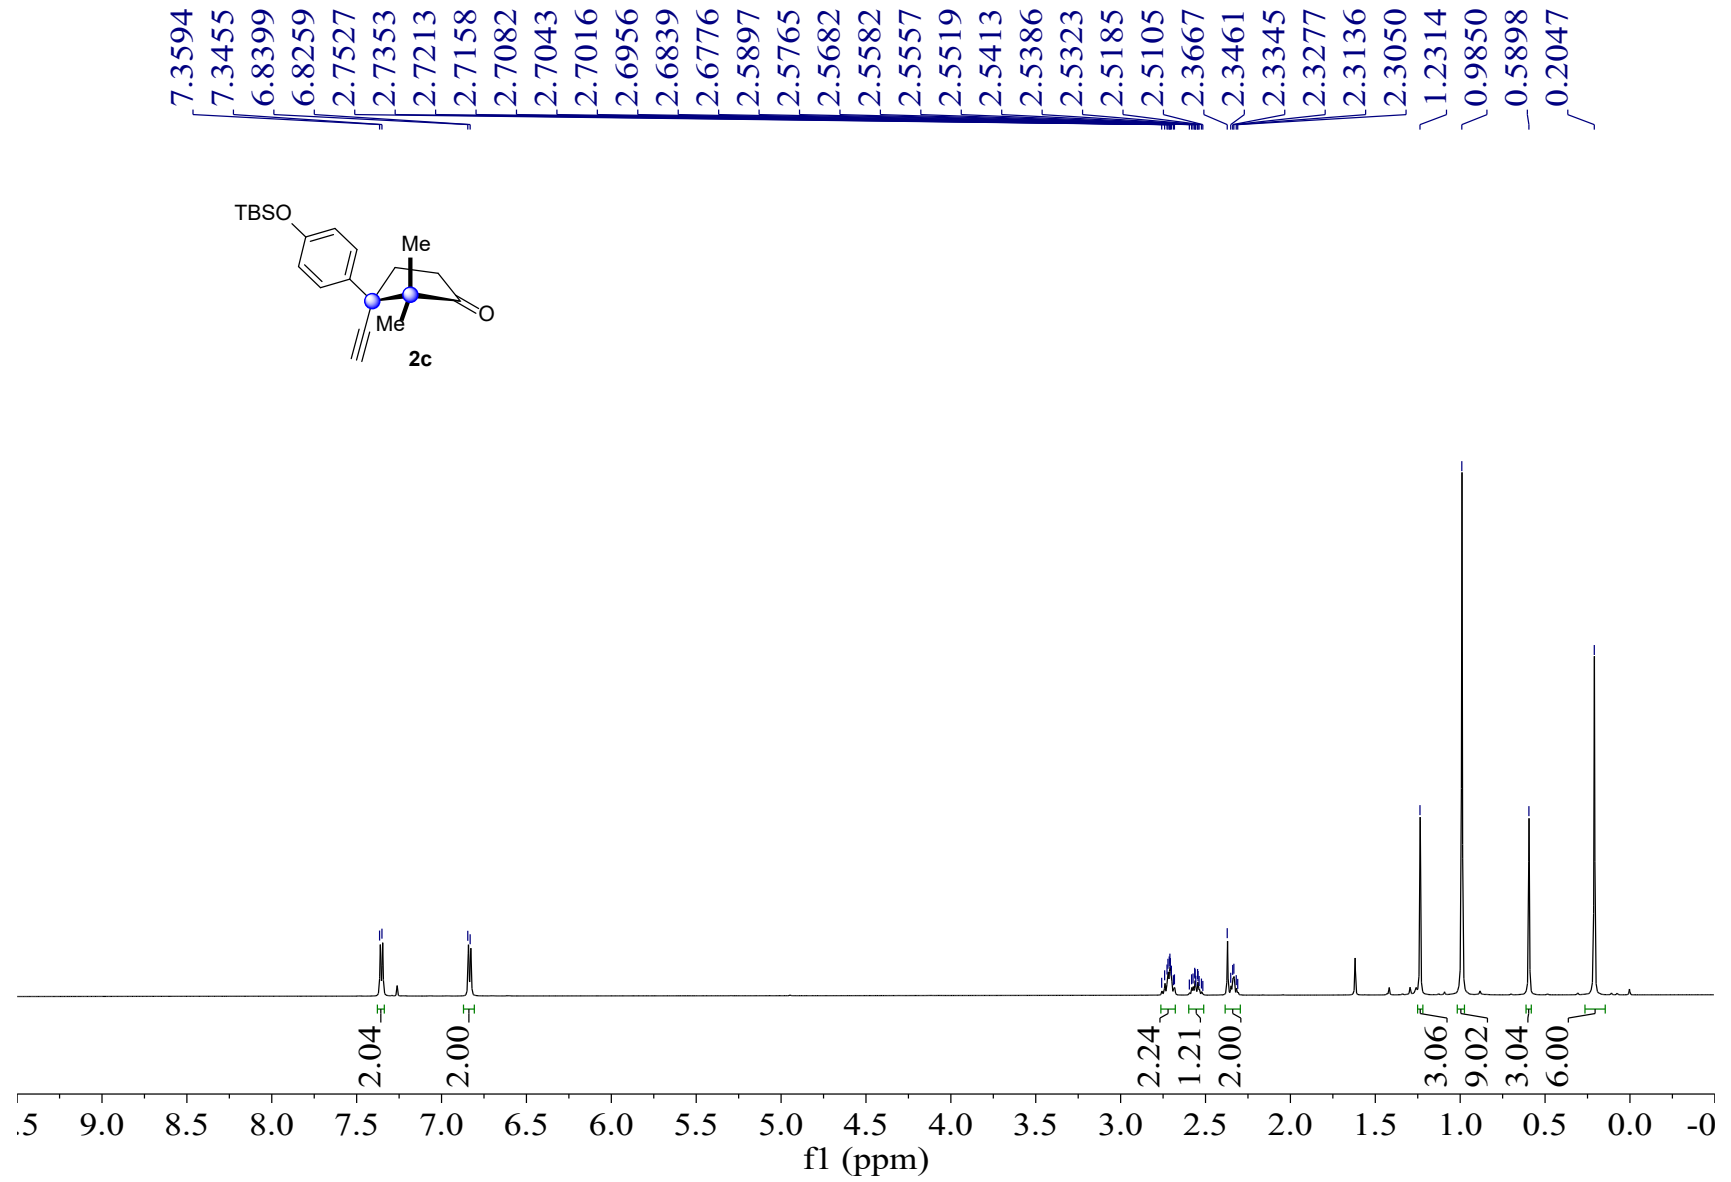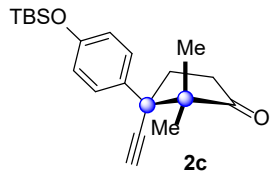

<sup>1</sup>H NMR spectrum of compound **2c**

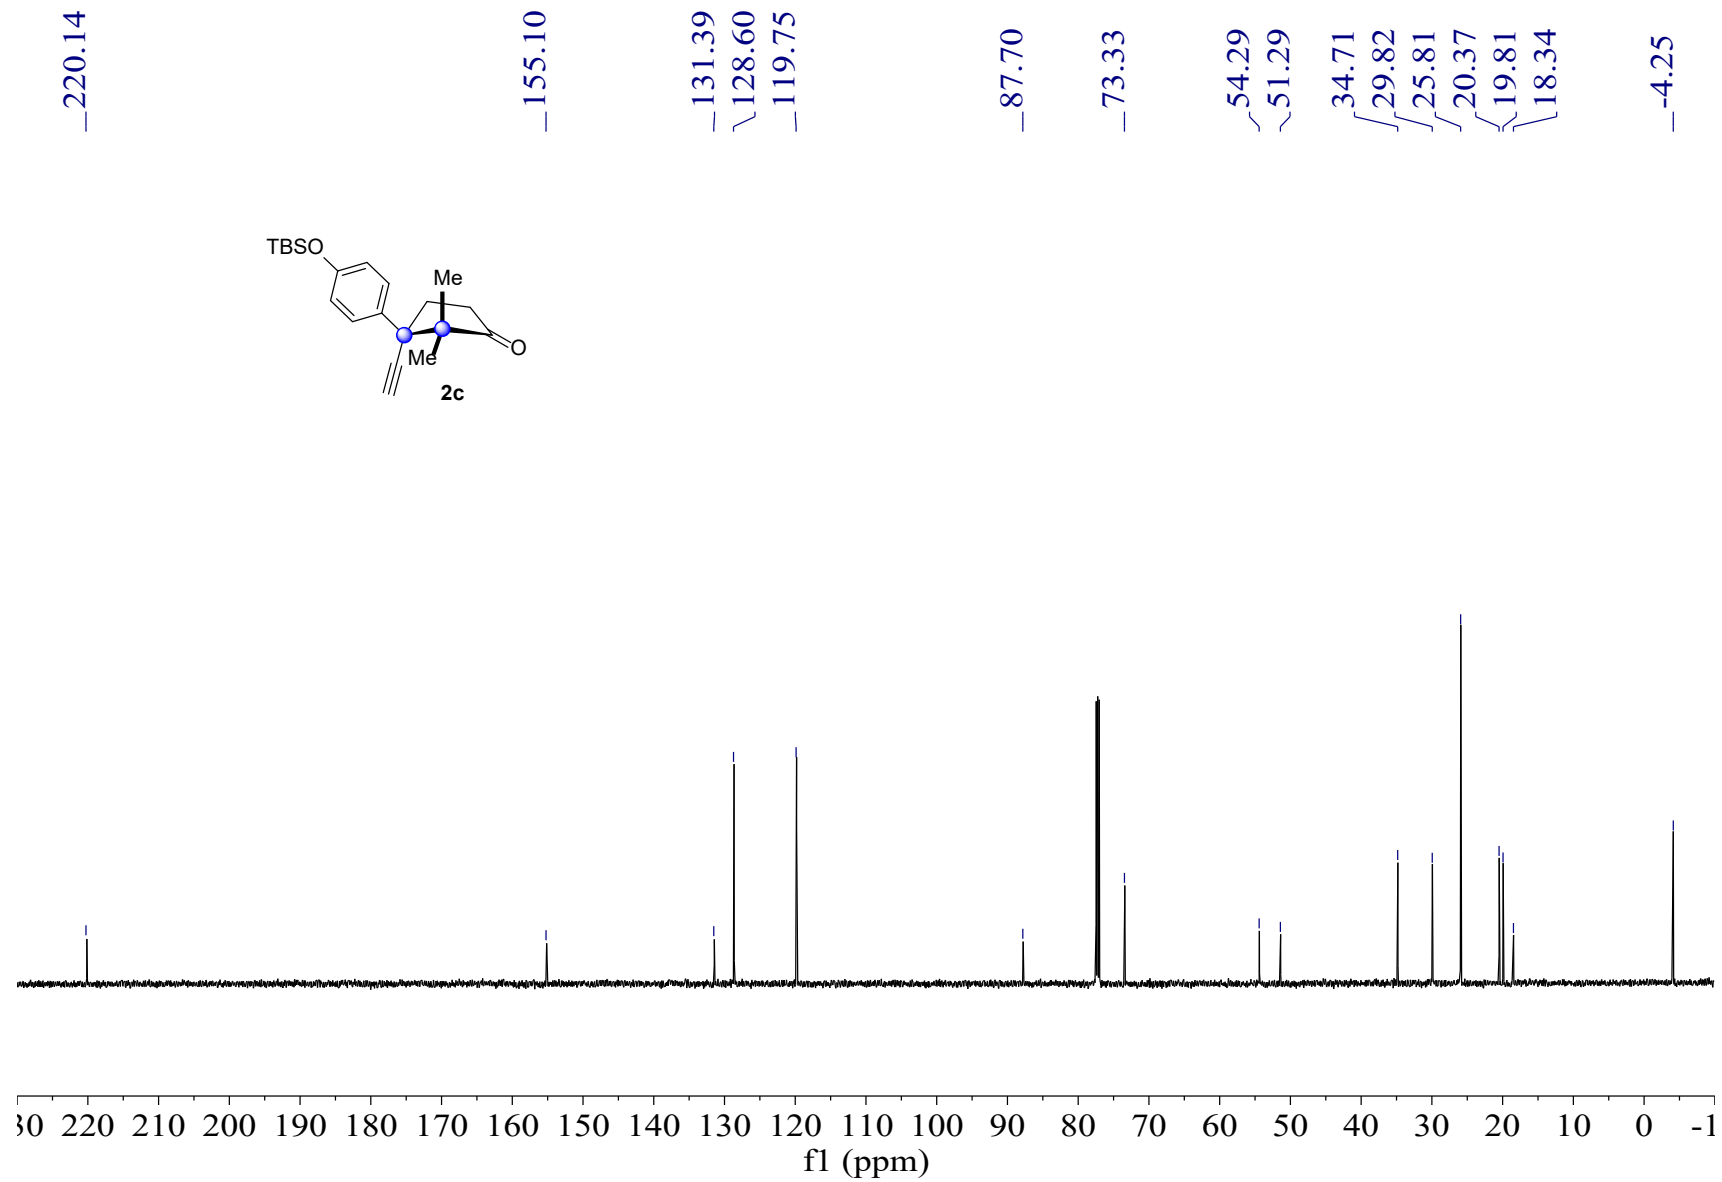

<sup>13</sup>C NMR spectrum of compound **2c**

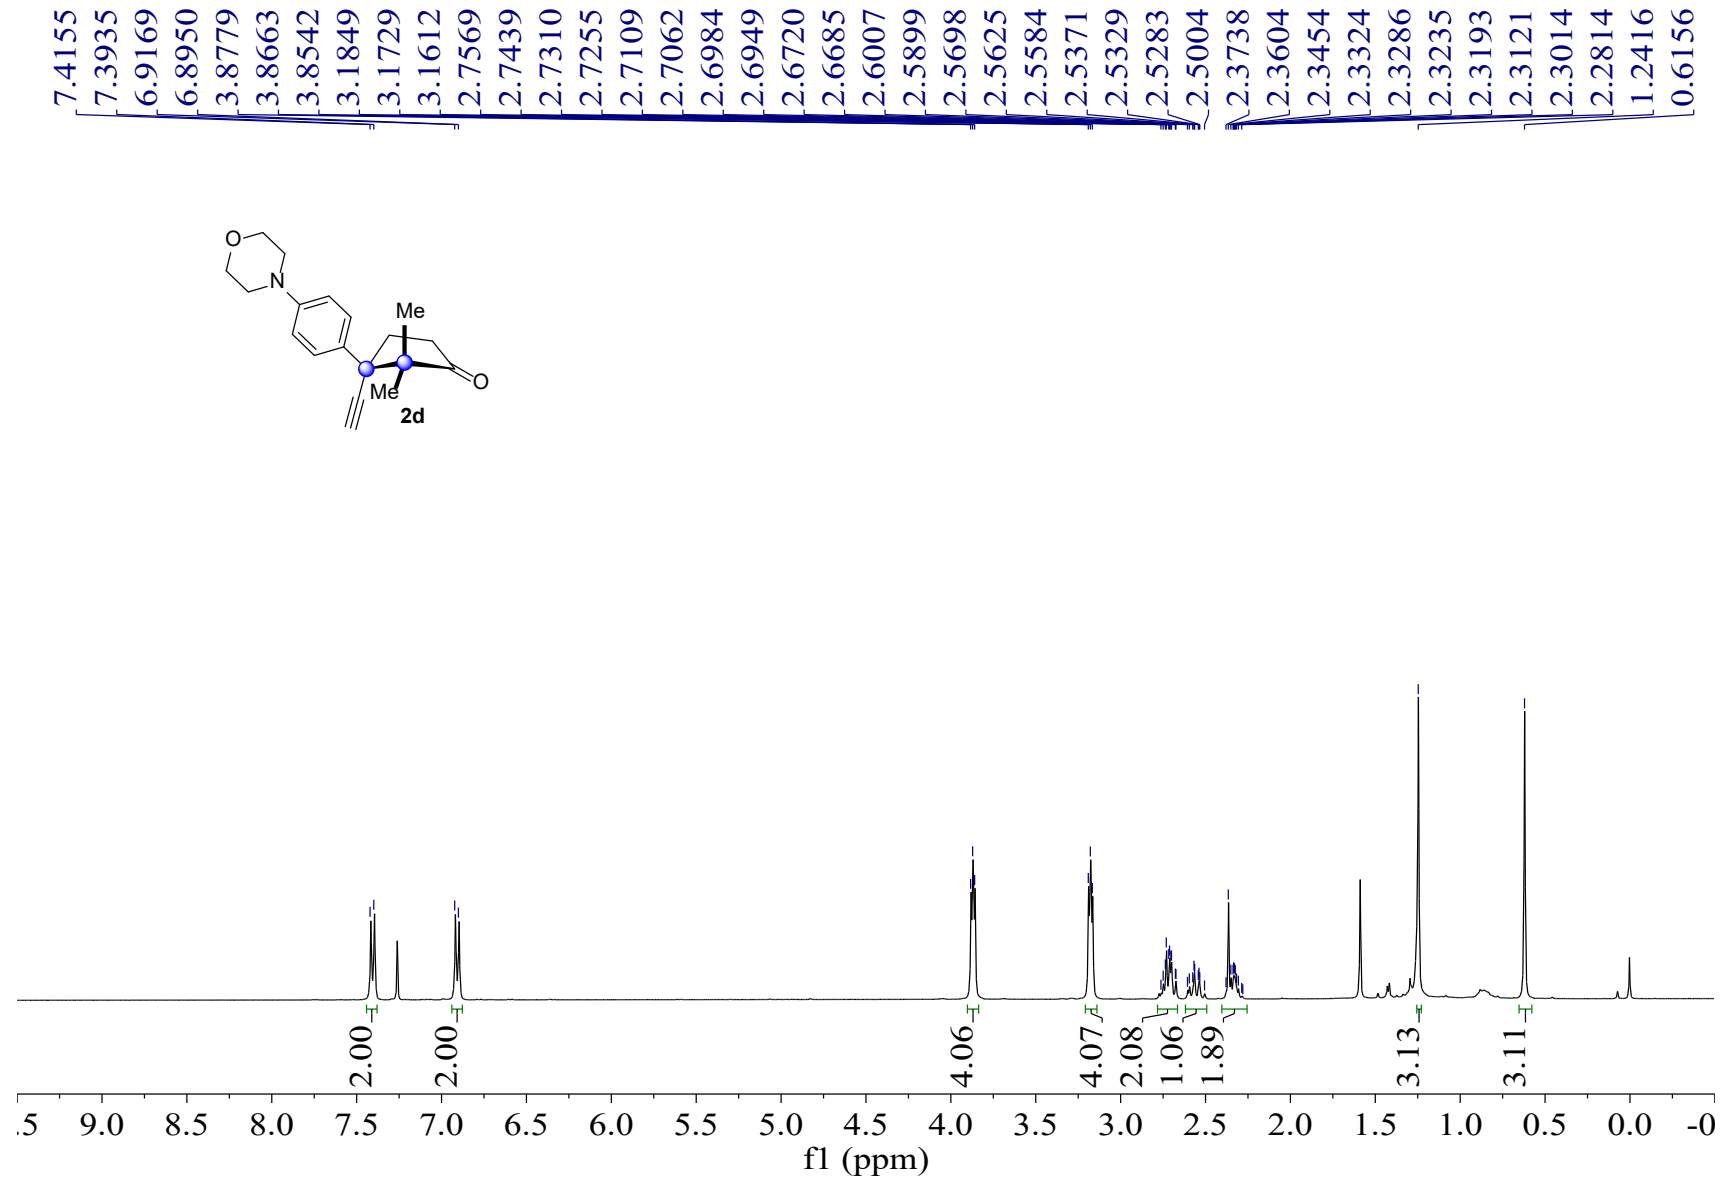

<sup>1</sup>H NMR spectrum of compound **2d**

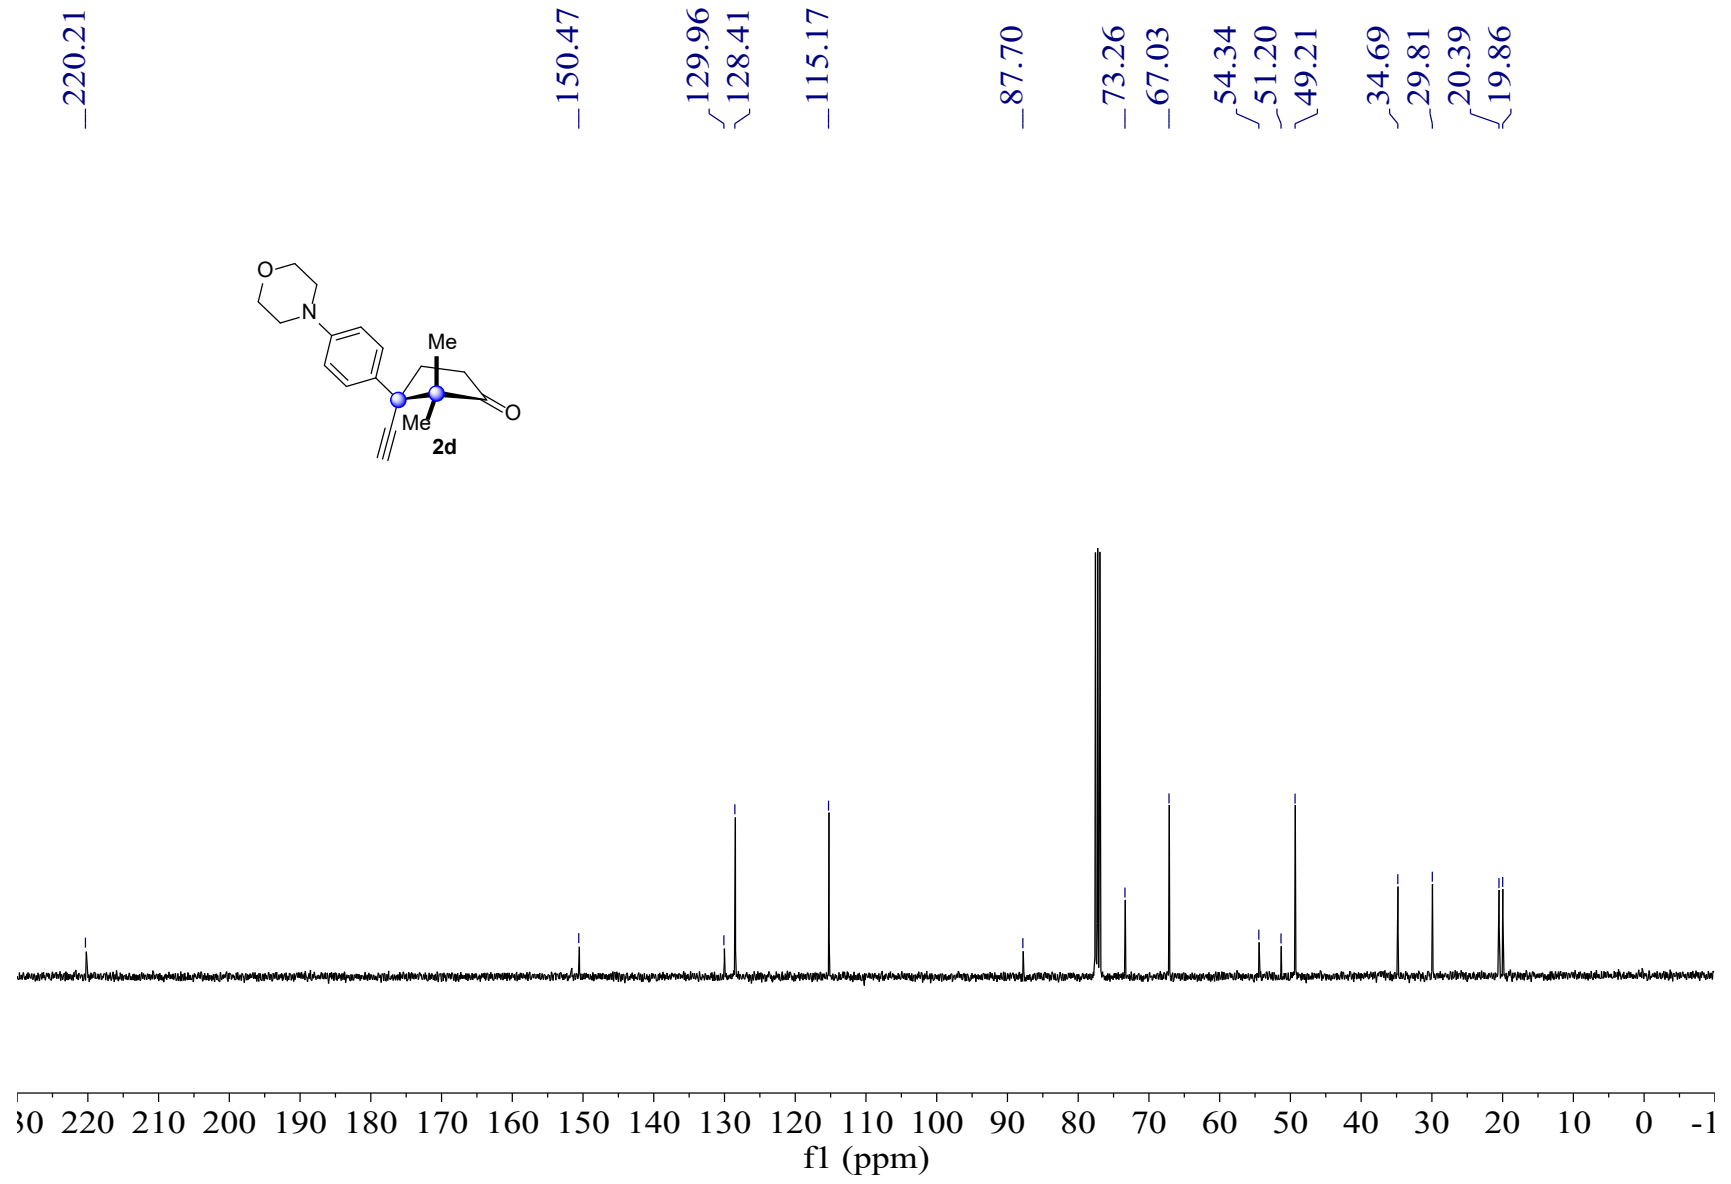

$^{13}\text{C}$  NMR spectrum of compound **2d**

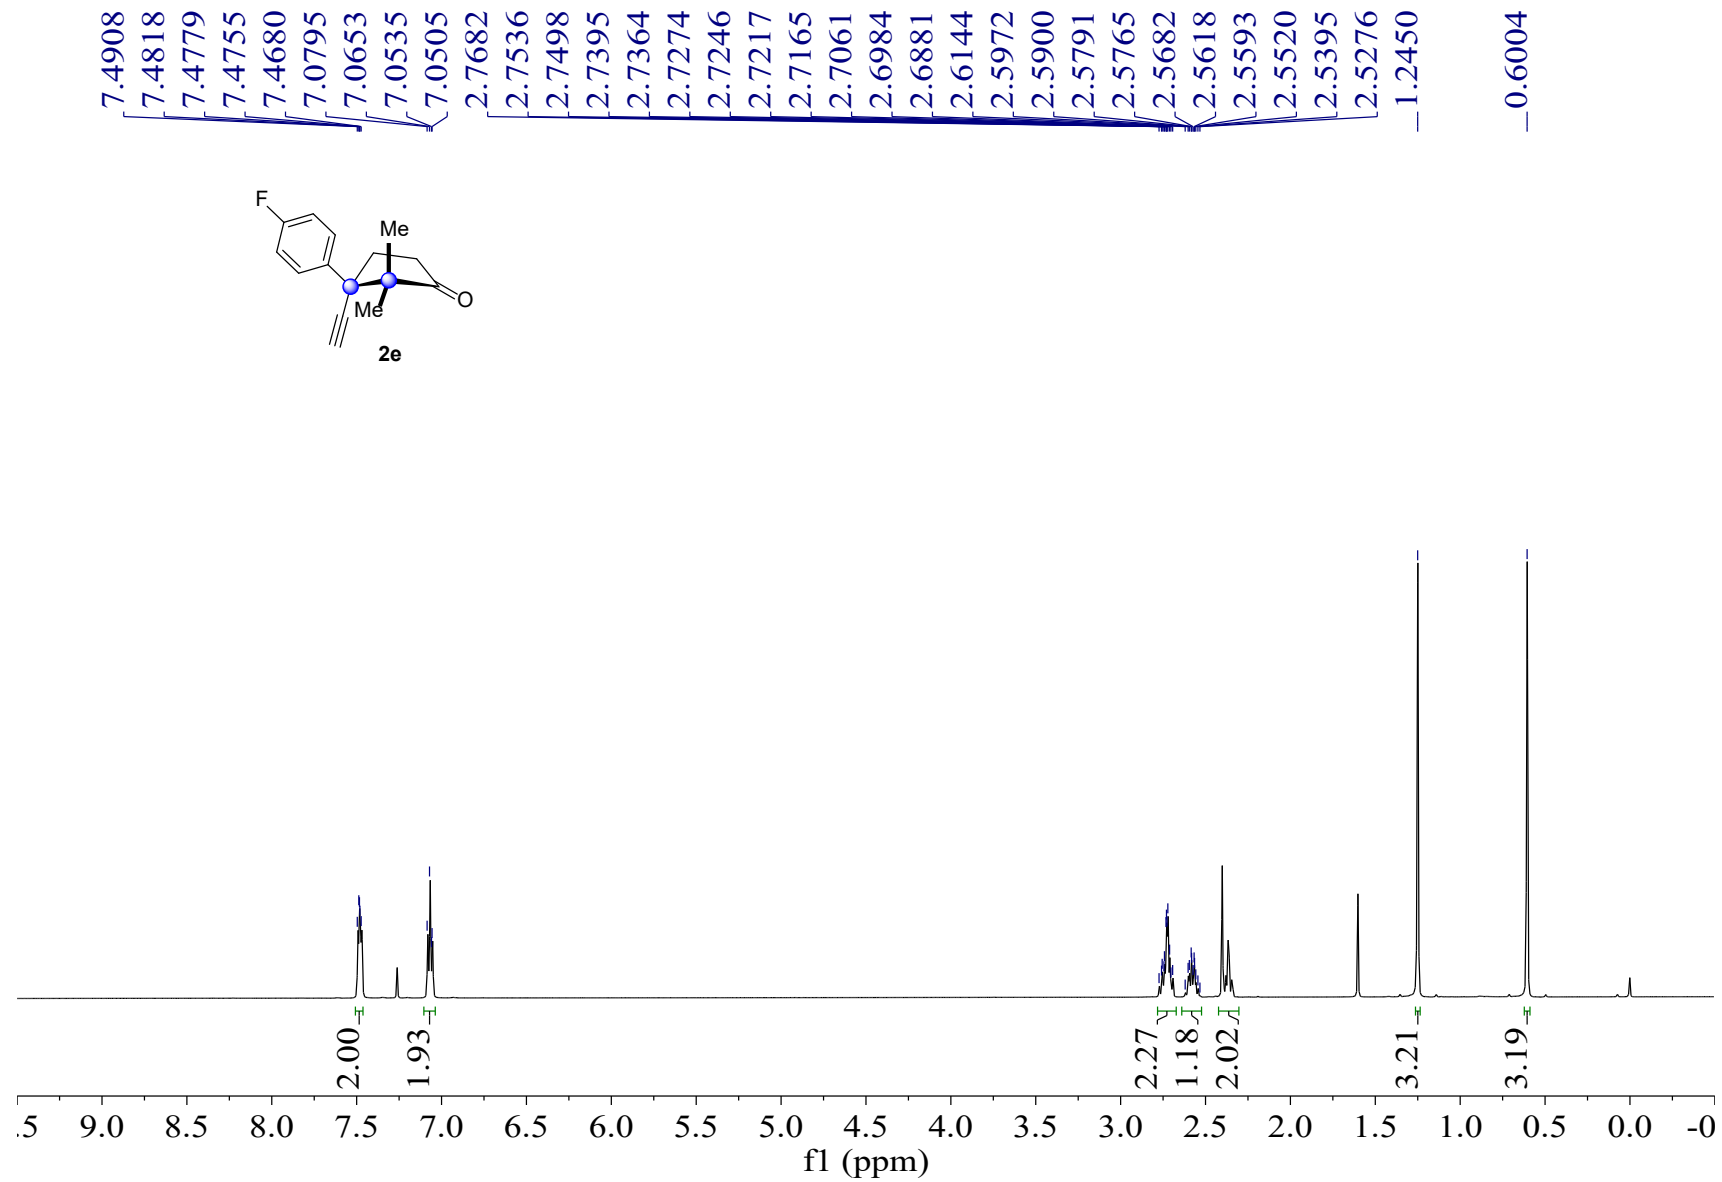

<sup>1</sup>H NMR spectrum of compound **2e**

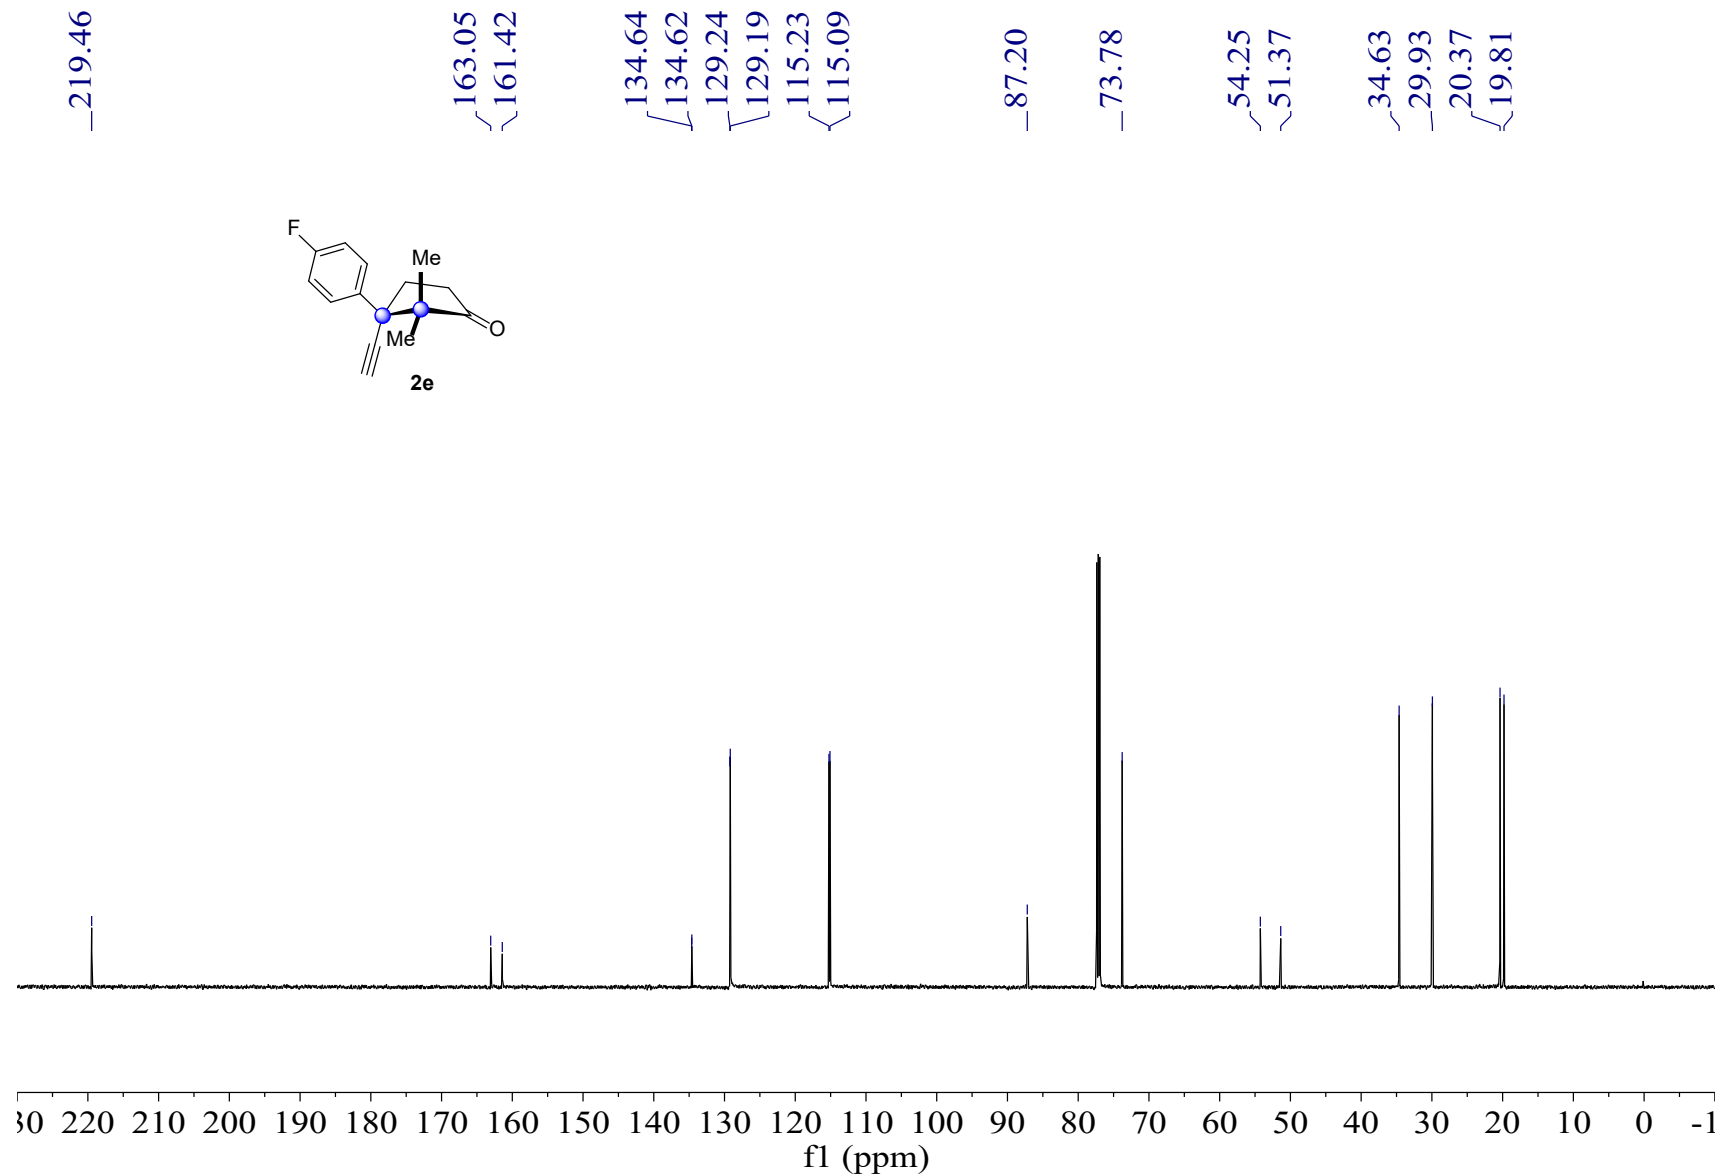

<sup>13</sup>C NMR spectrum of compound **2e**

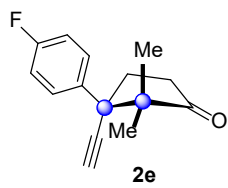

-115.43

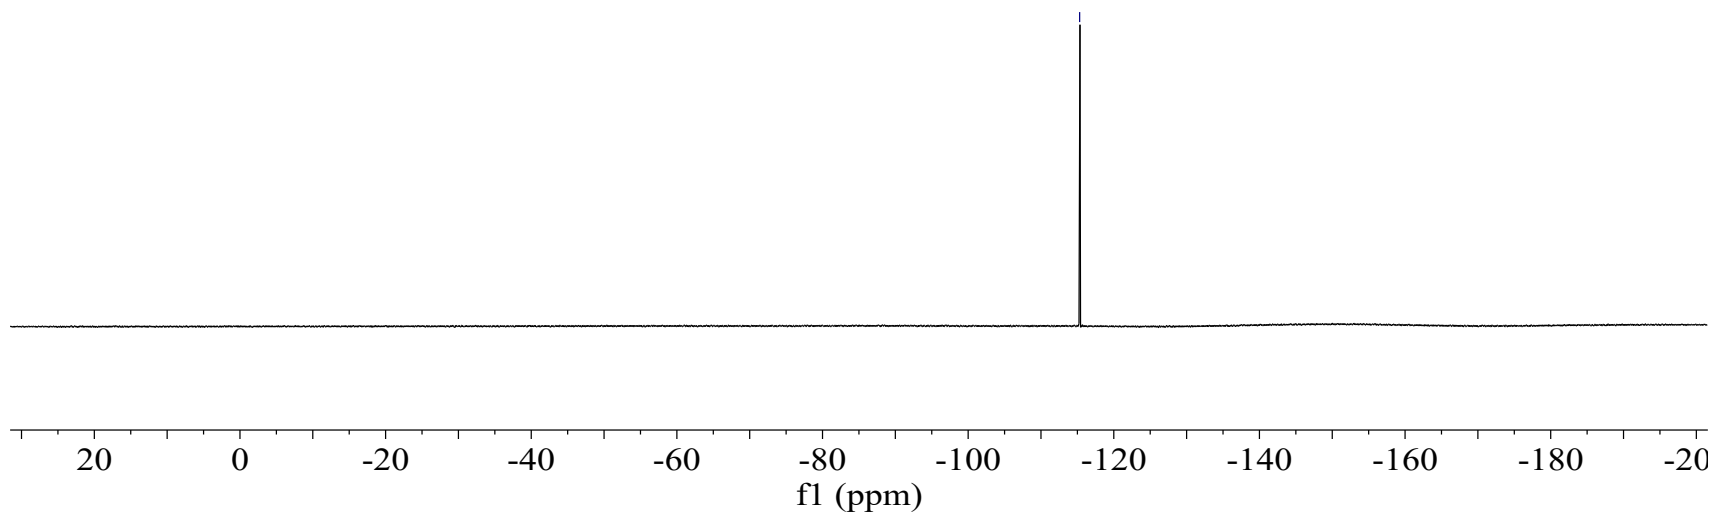

<sup>19</sup>F NMR spectrum of compound **2e**



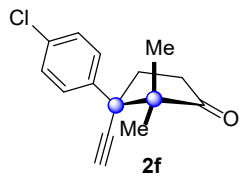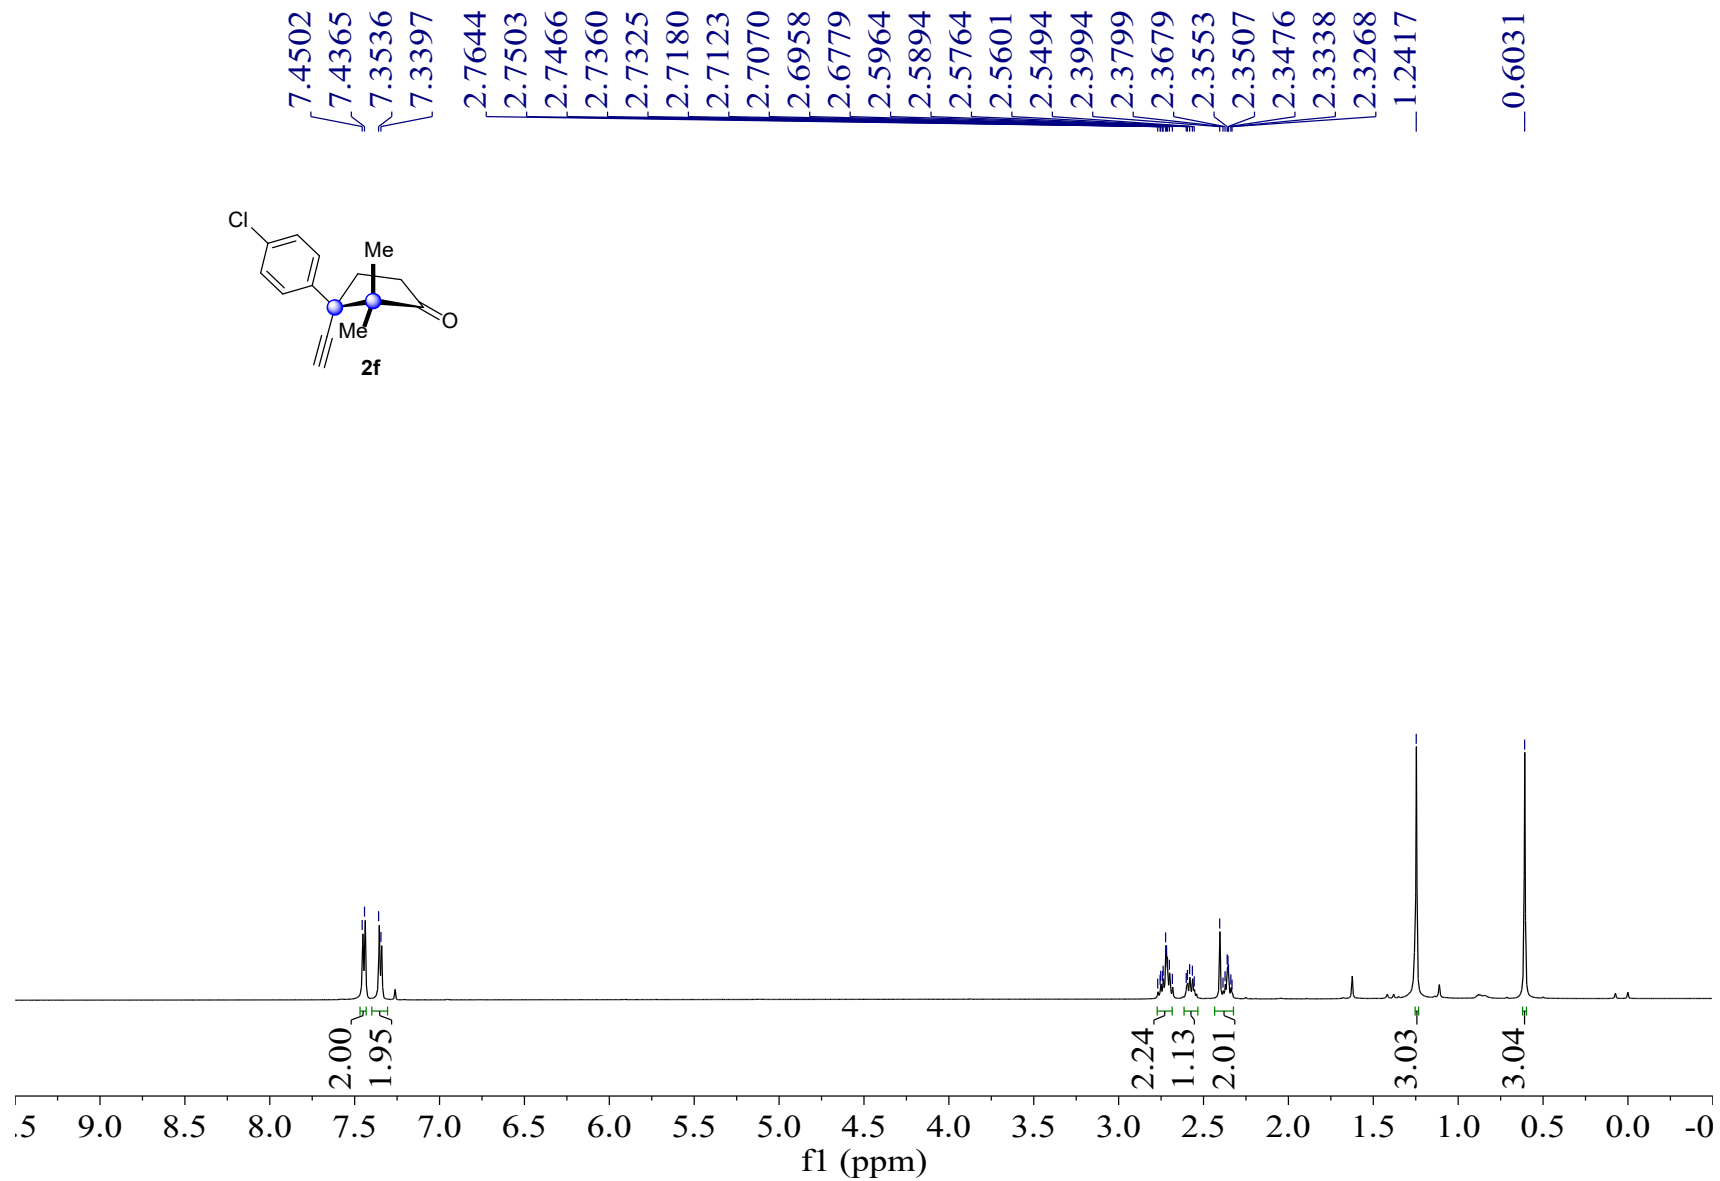

<sup>1</sup>H NMR spectrum of compound **2f**

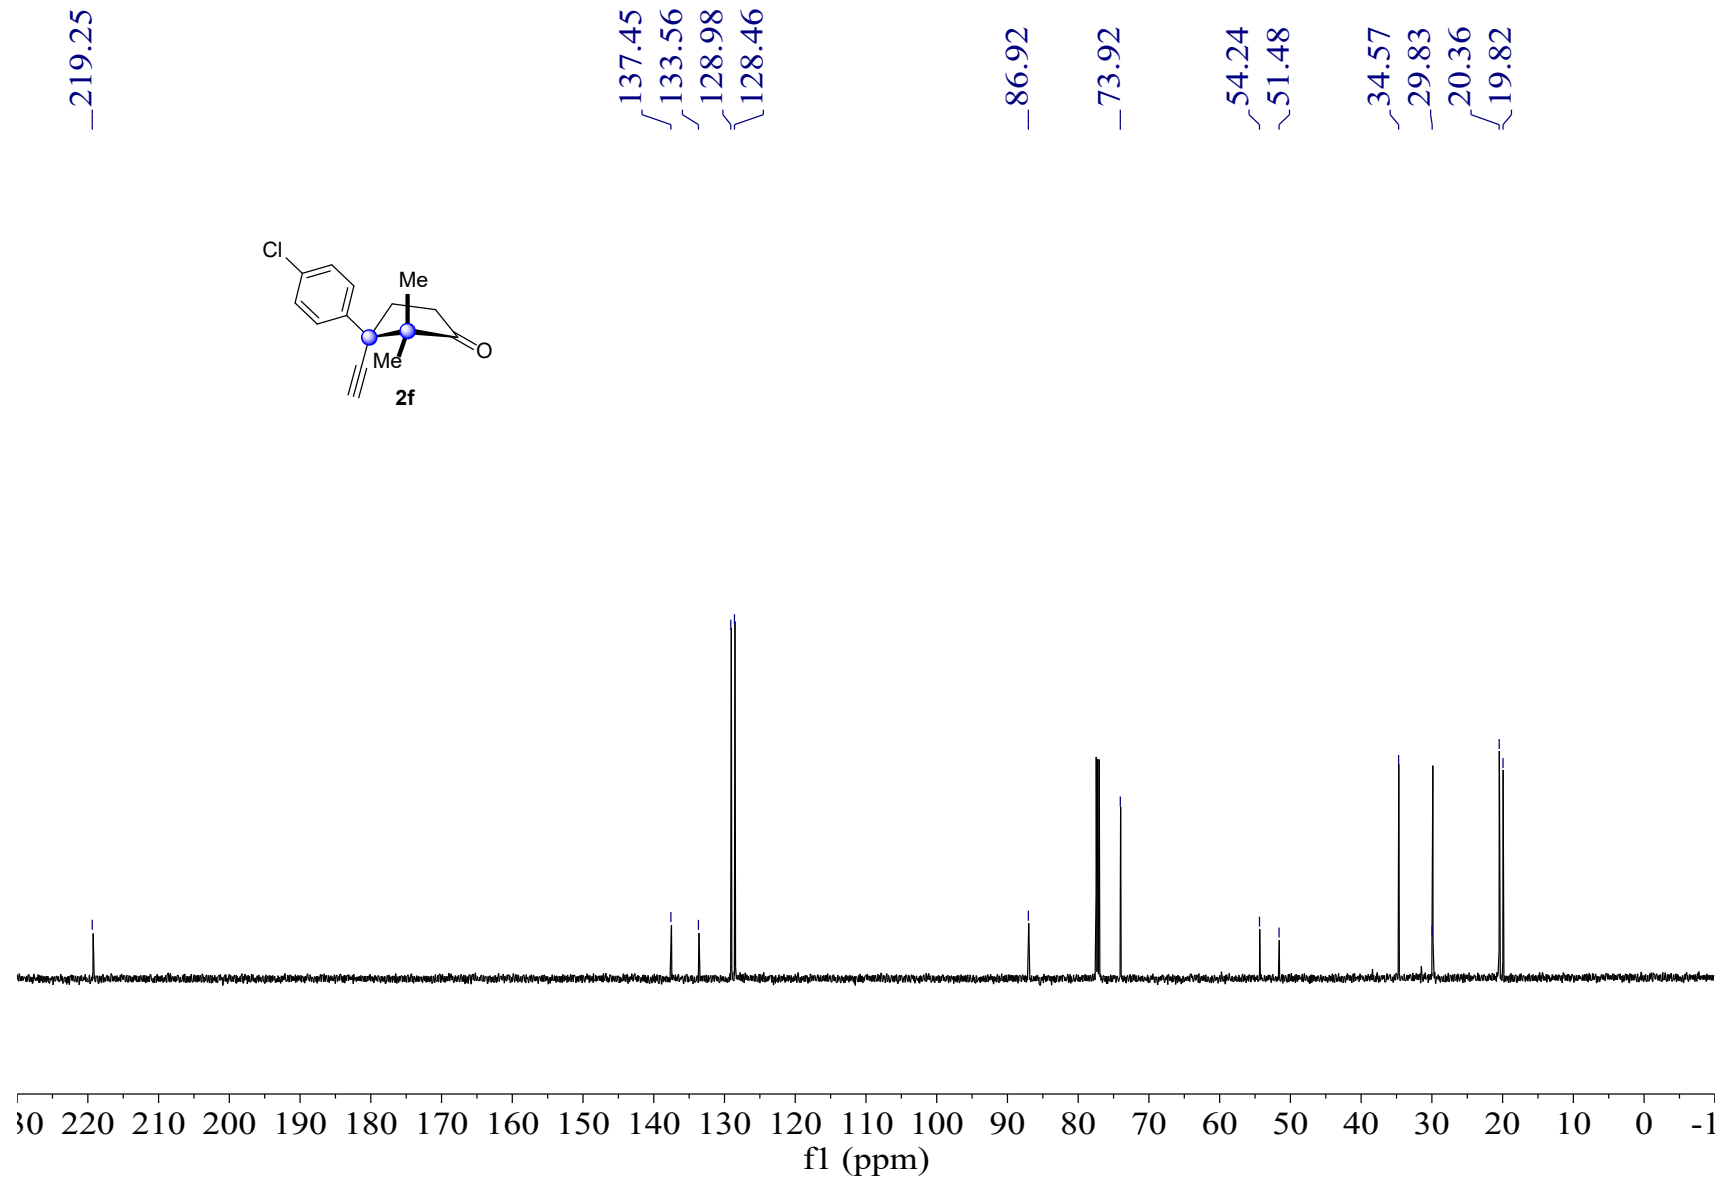

$^{13}\text{C}$  NMR spectrum of compound **2f**

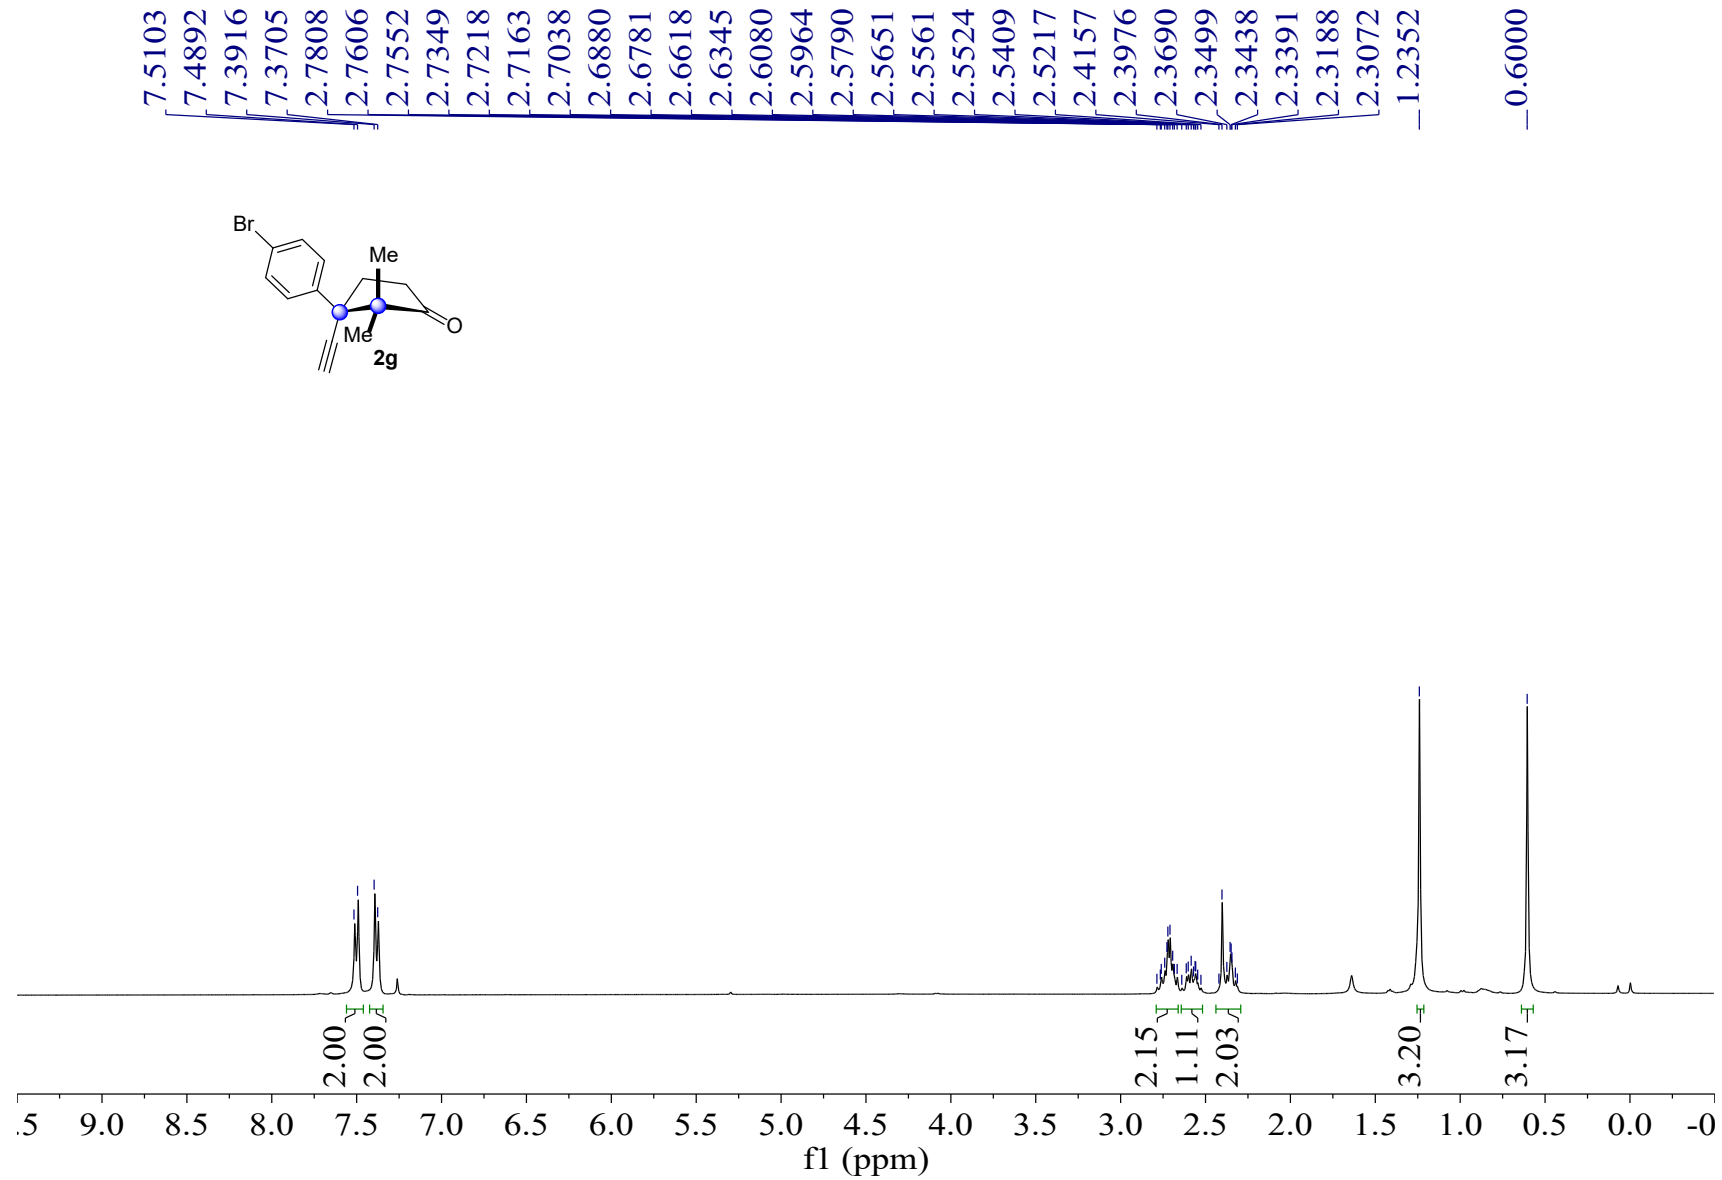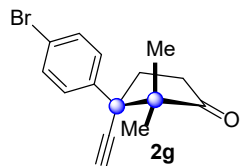

<sup>1</sup>H NMR spectrum of compound **2g**

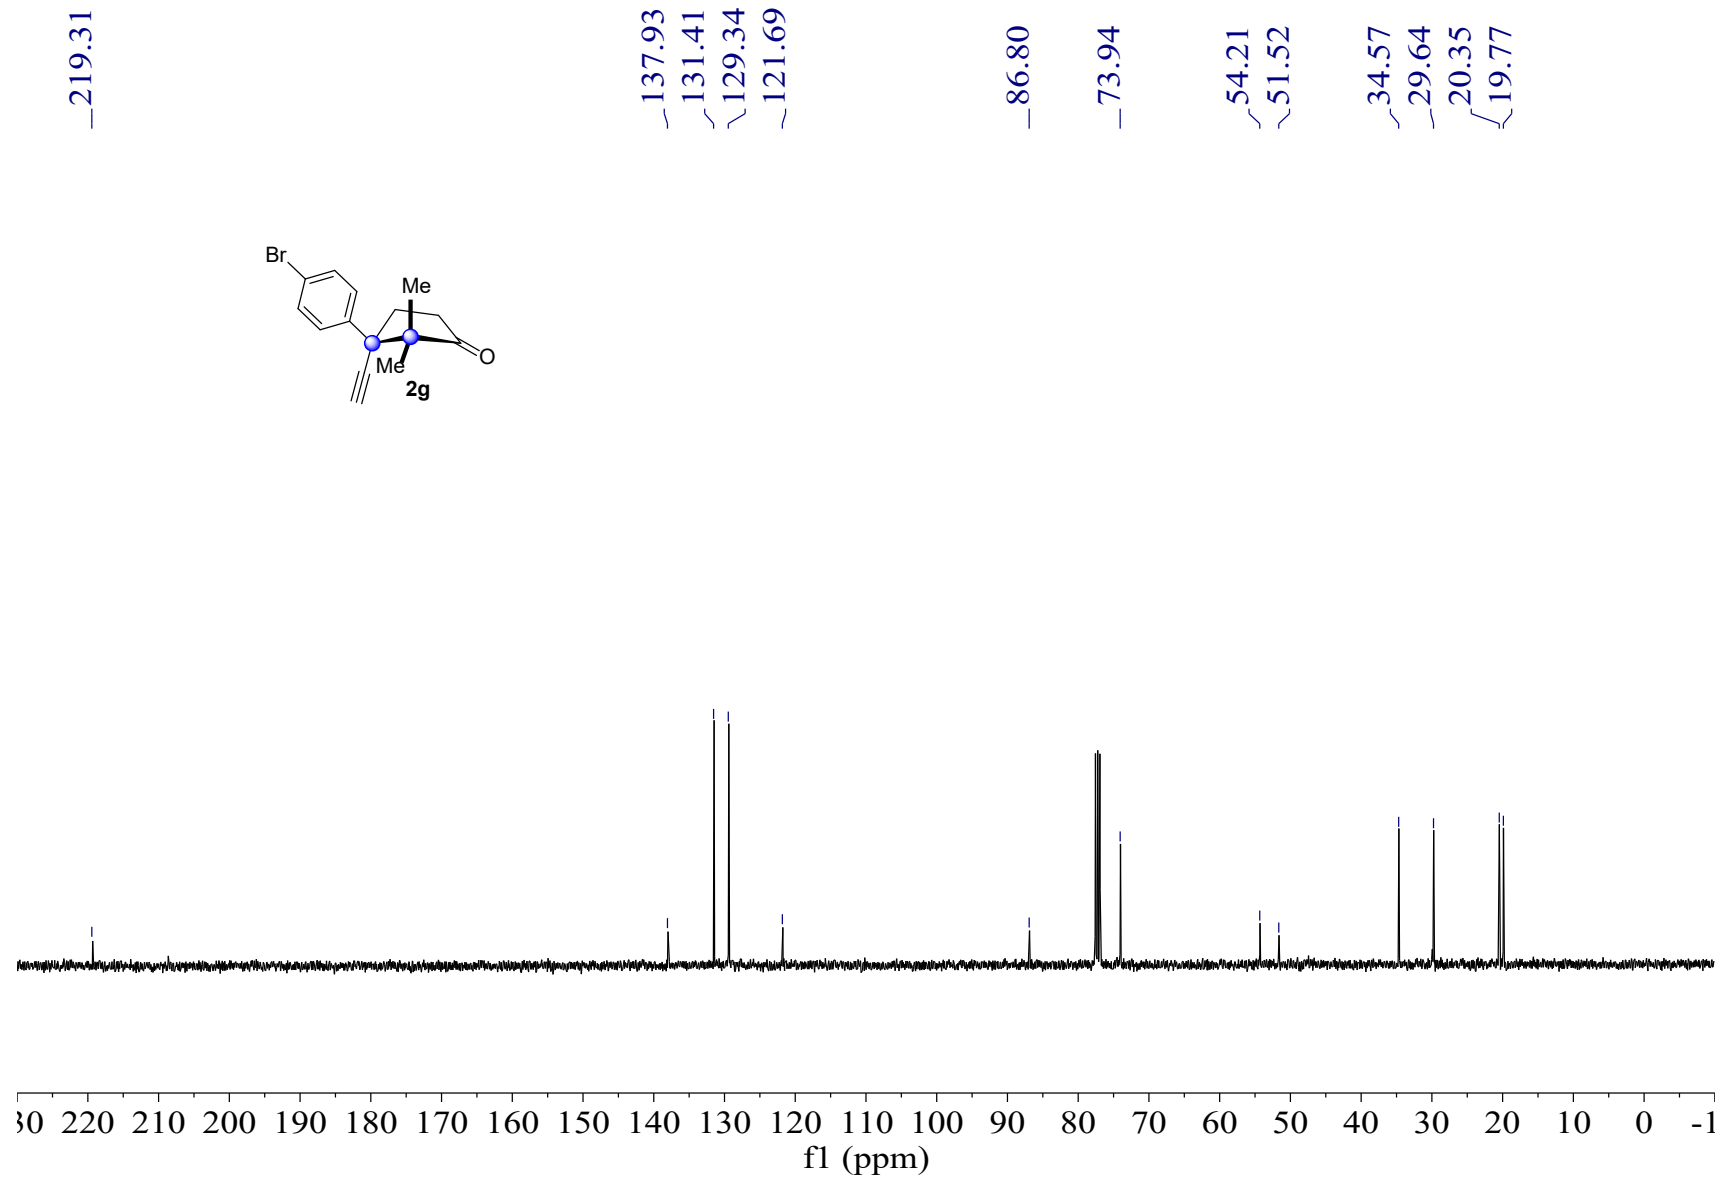

<sup>13</sup>C NMR spectrum of compound **2g**

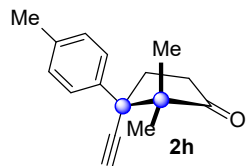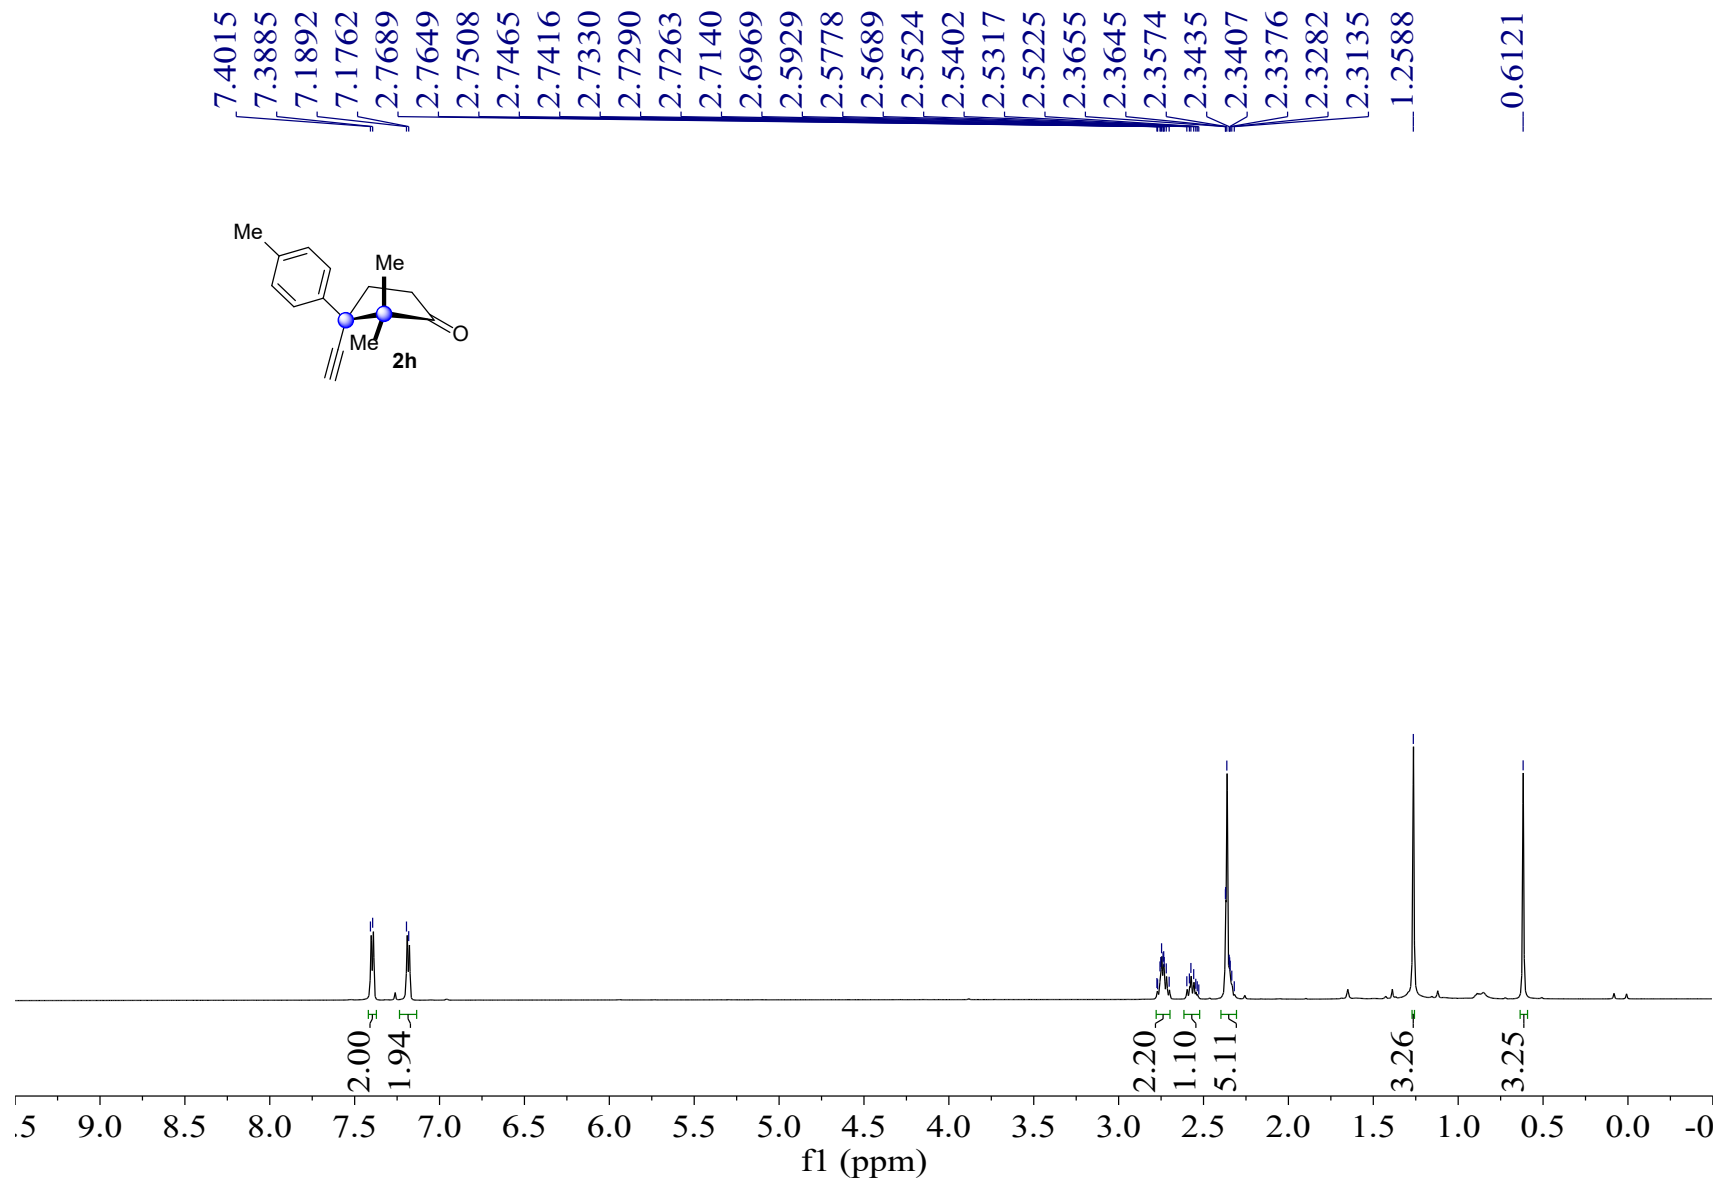

<sup>1</sup>H NMR spectrum of compound **2h**

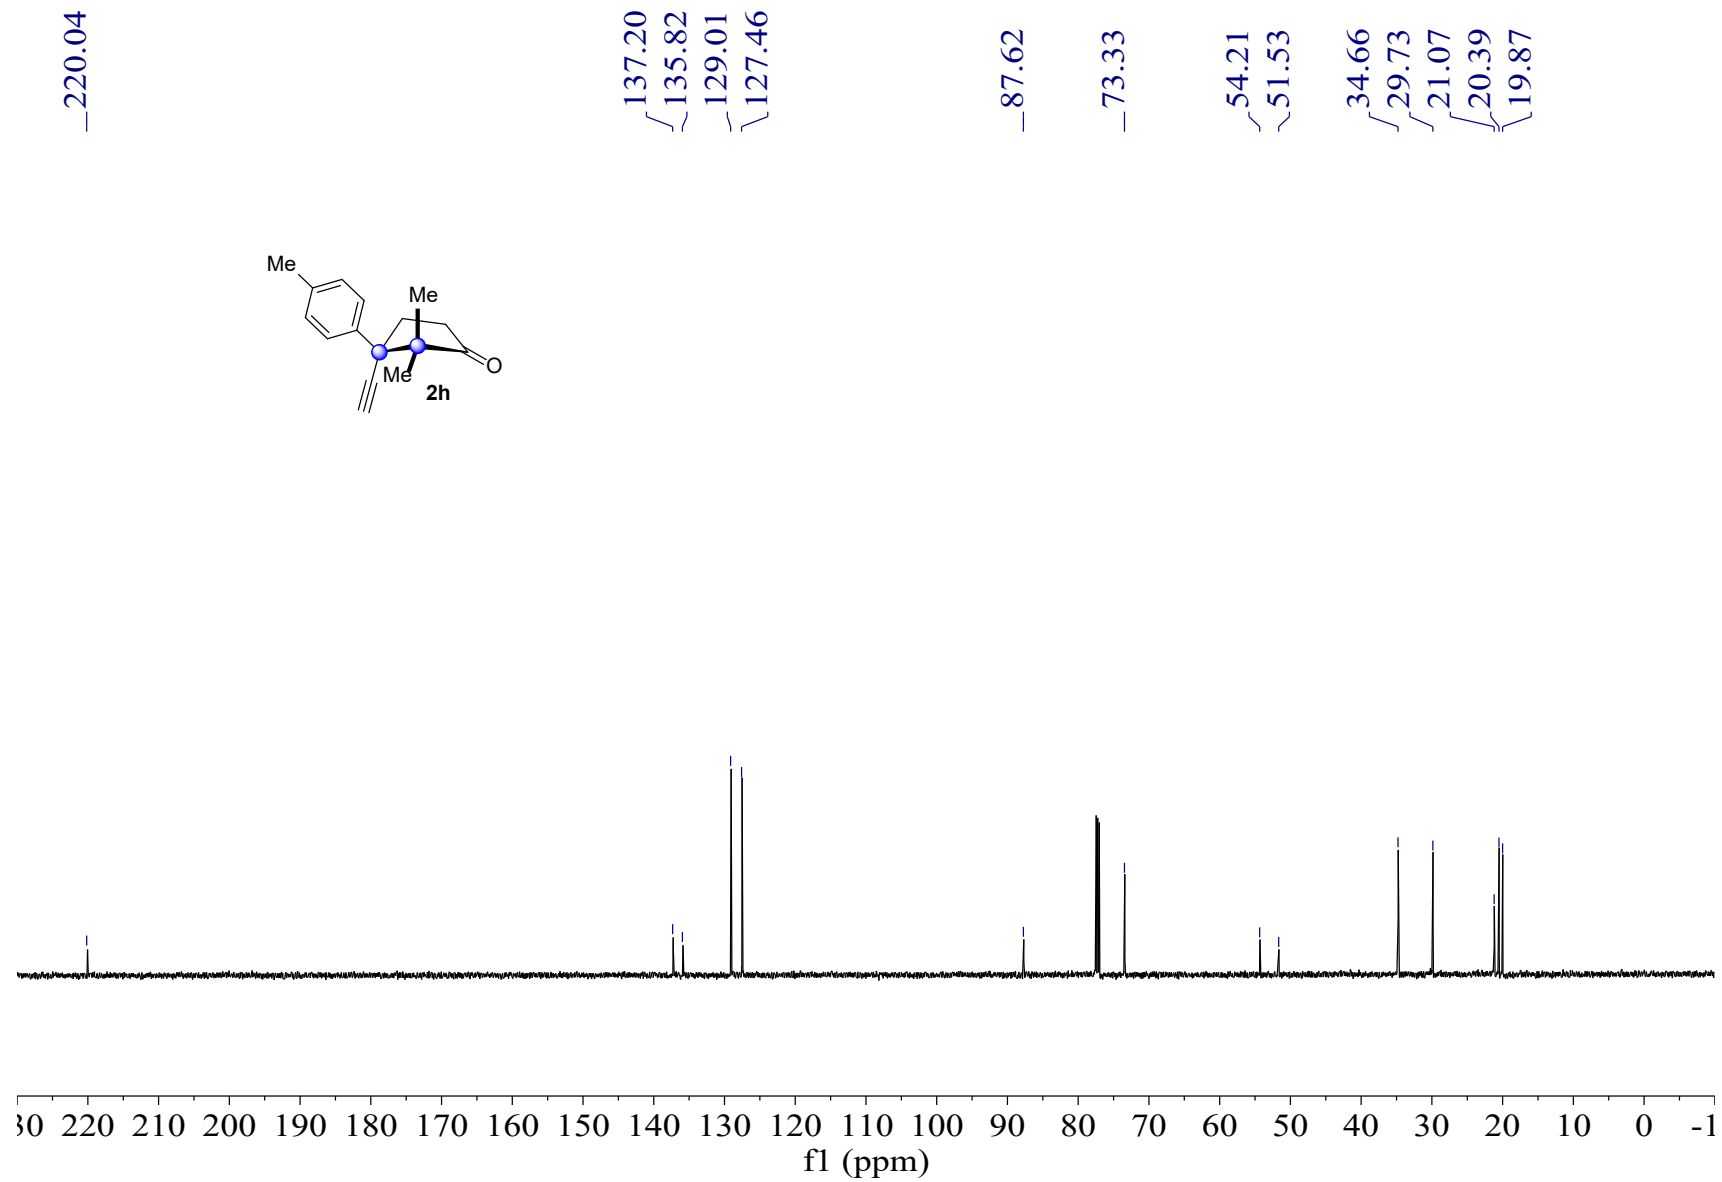

<sup>13</sup>C NMR spectrum of compound **2h**

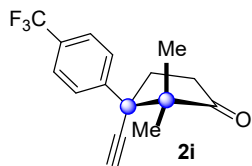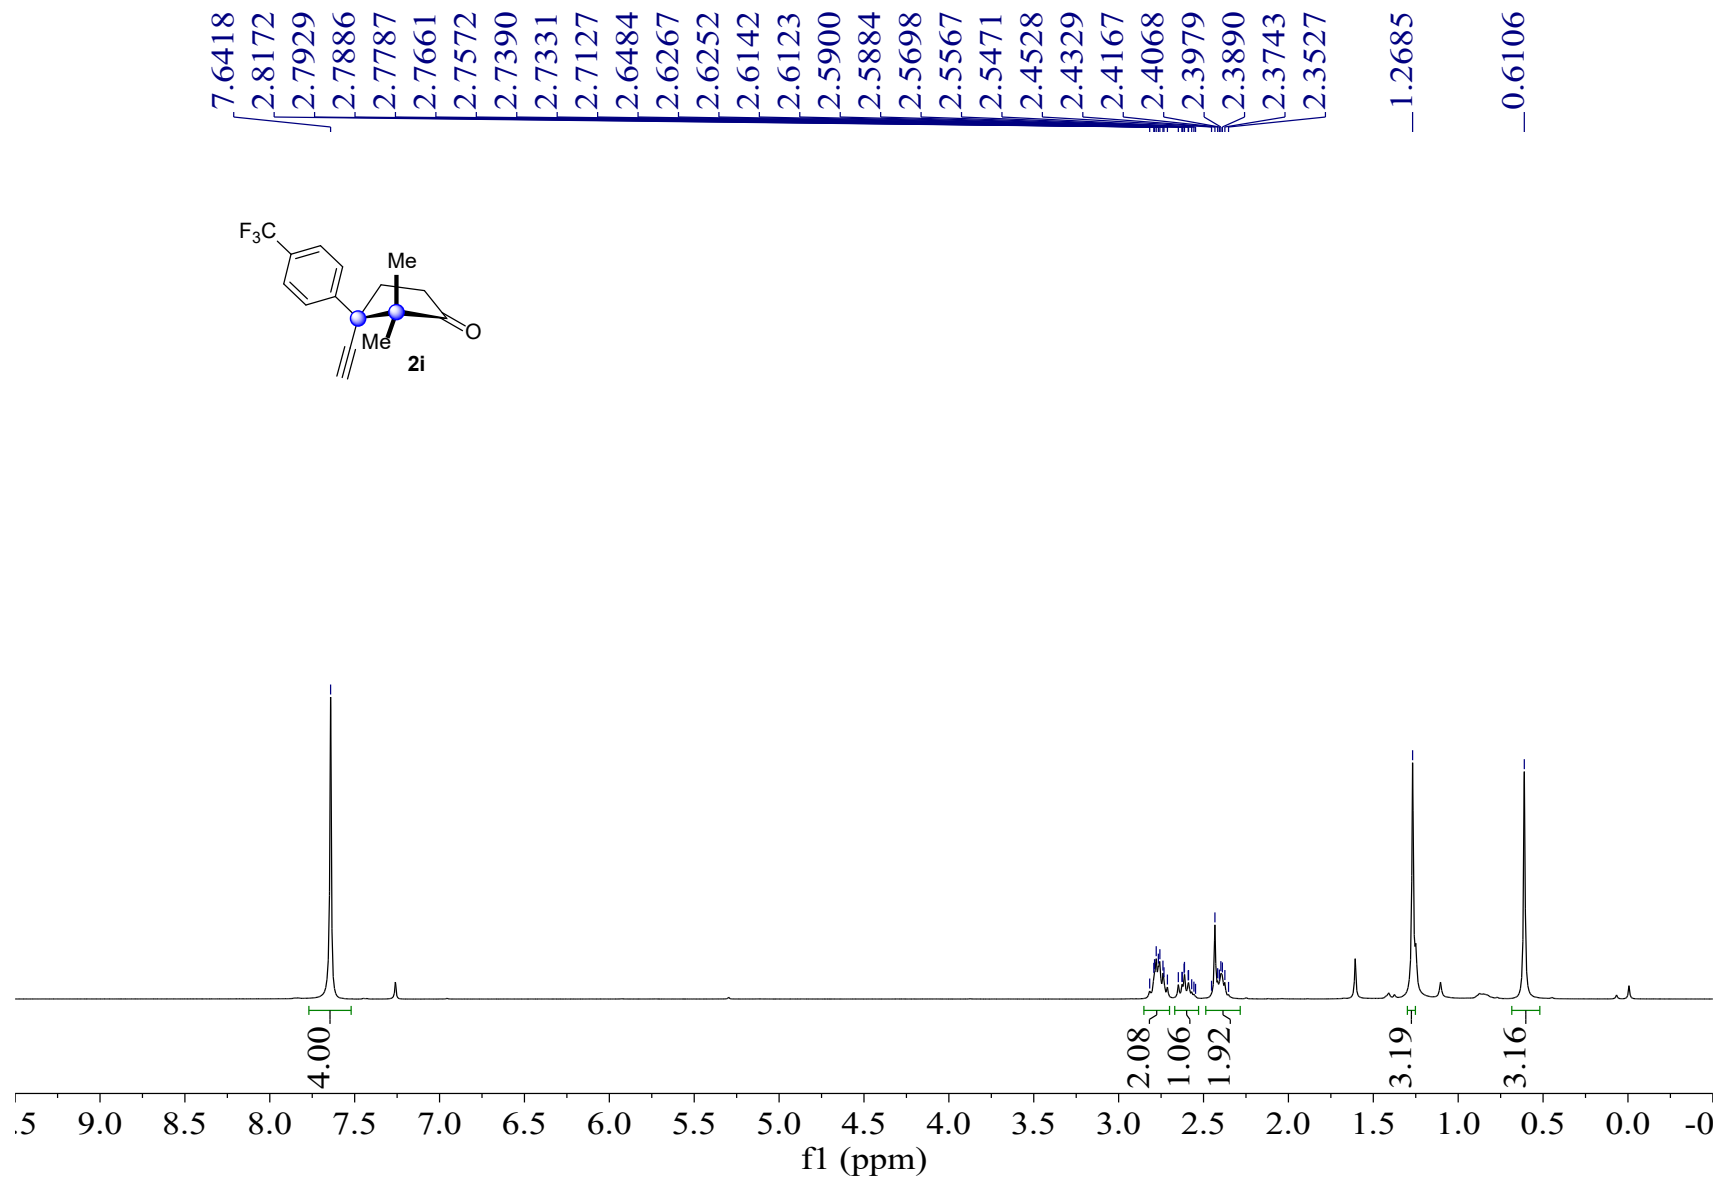

<sup>1</sup>H NMR spectrum of compound **2i**

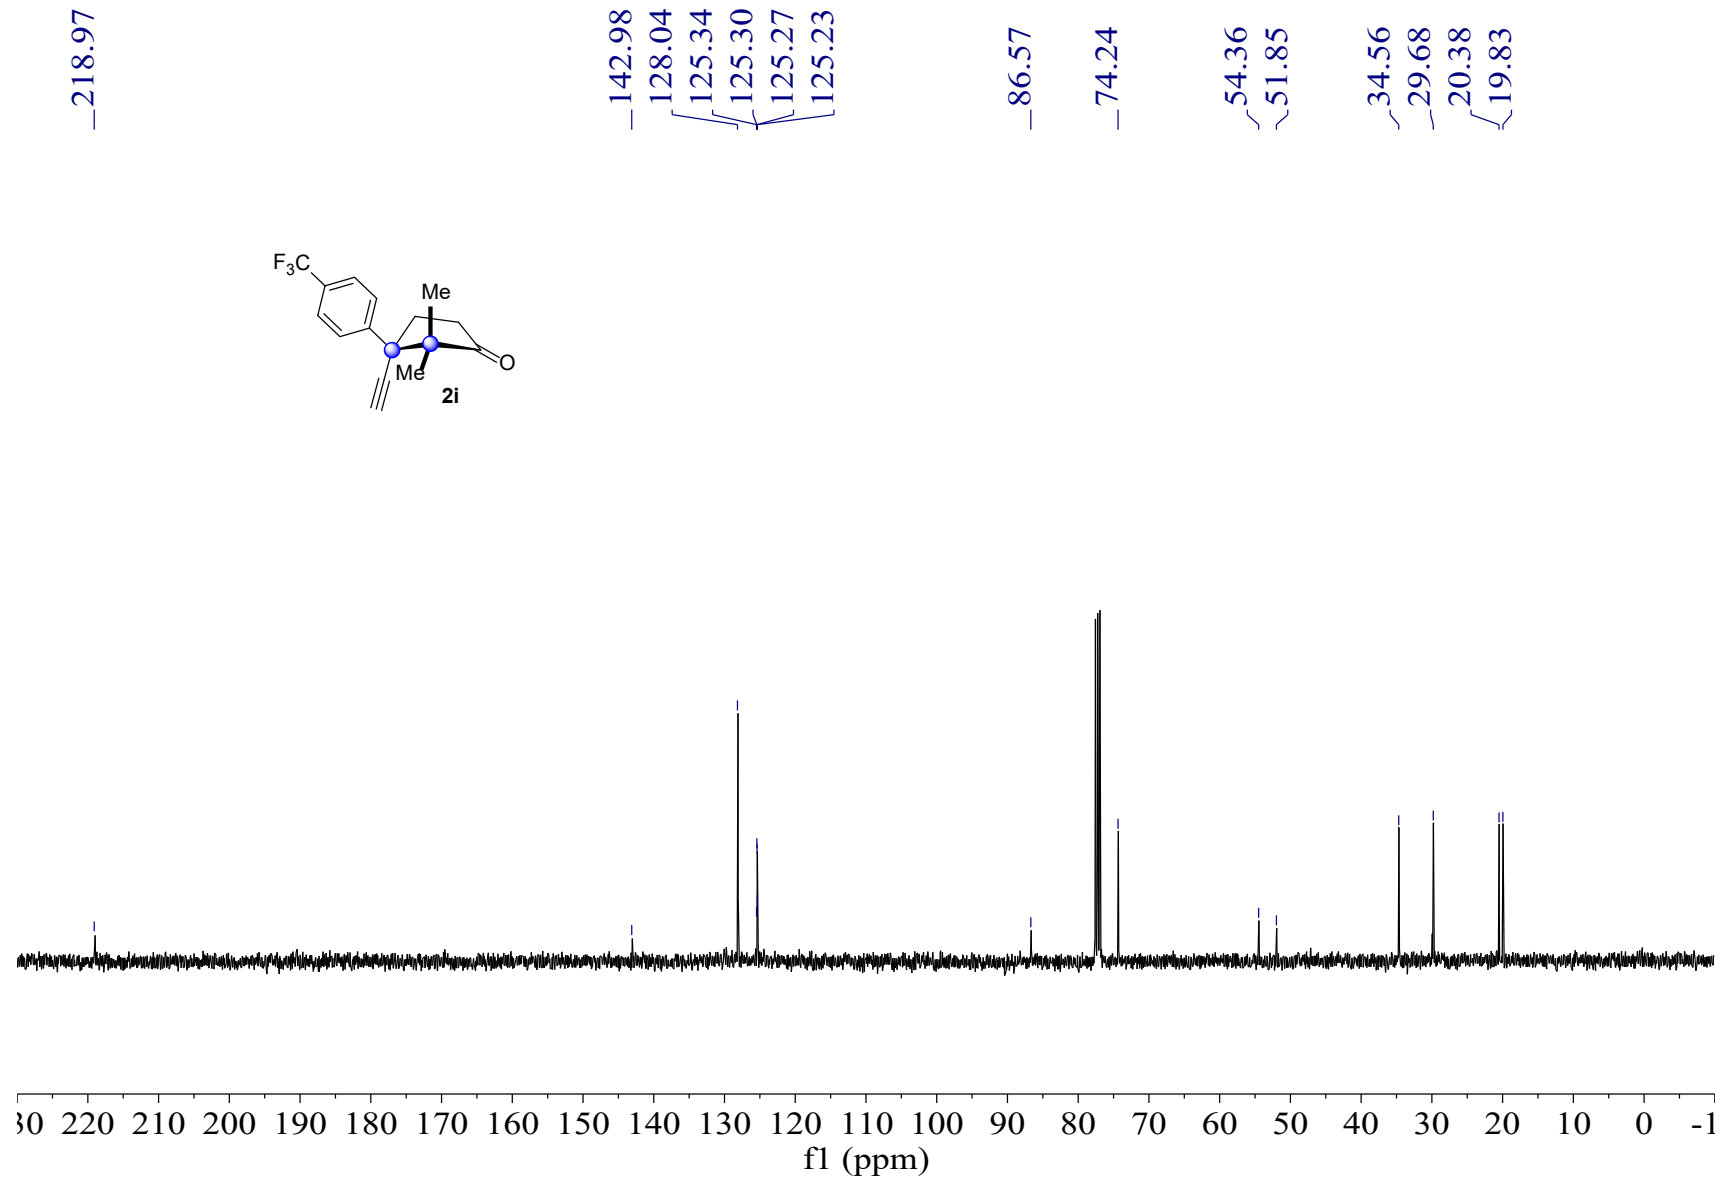

$^{13}\text{C}$  NMR spectrum of compound **2i**



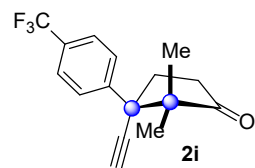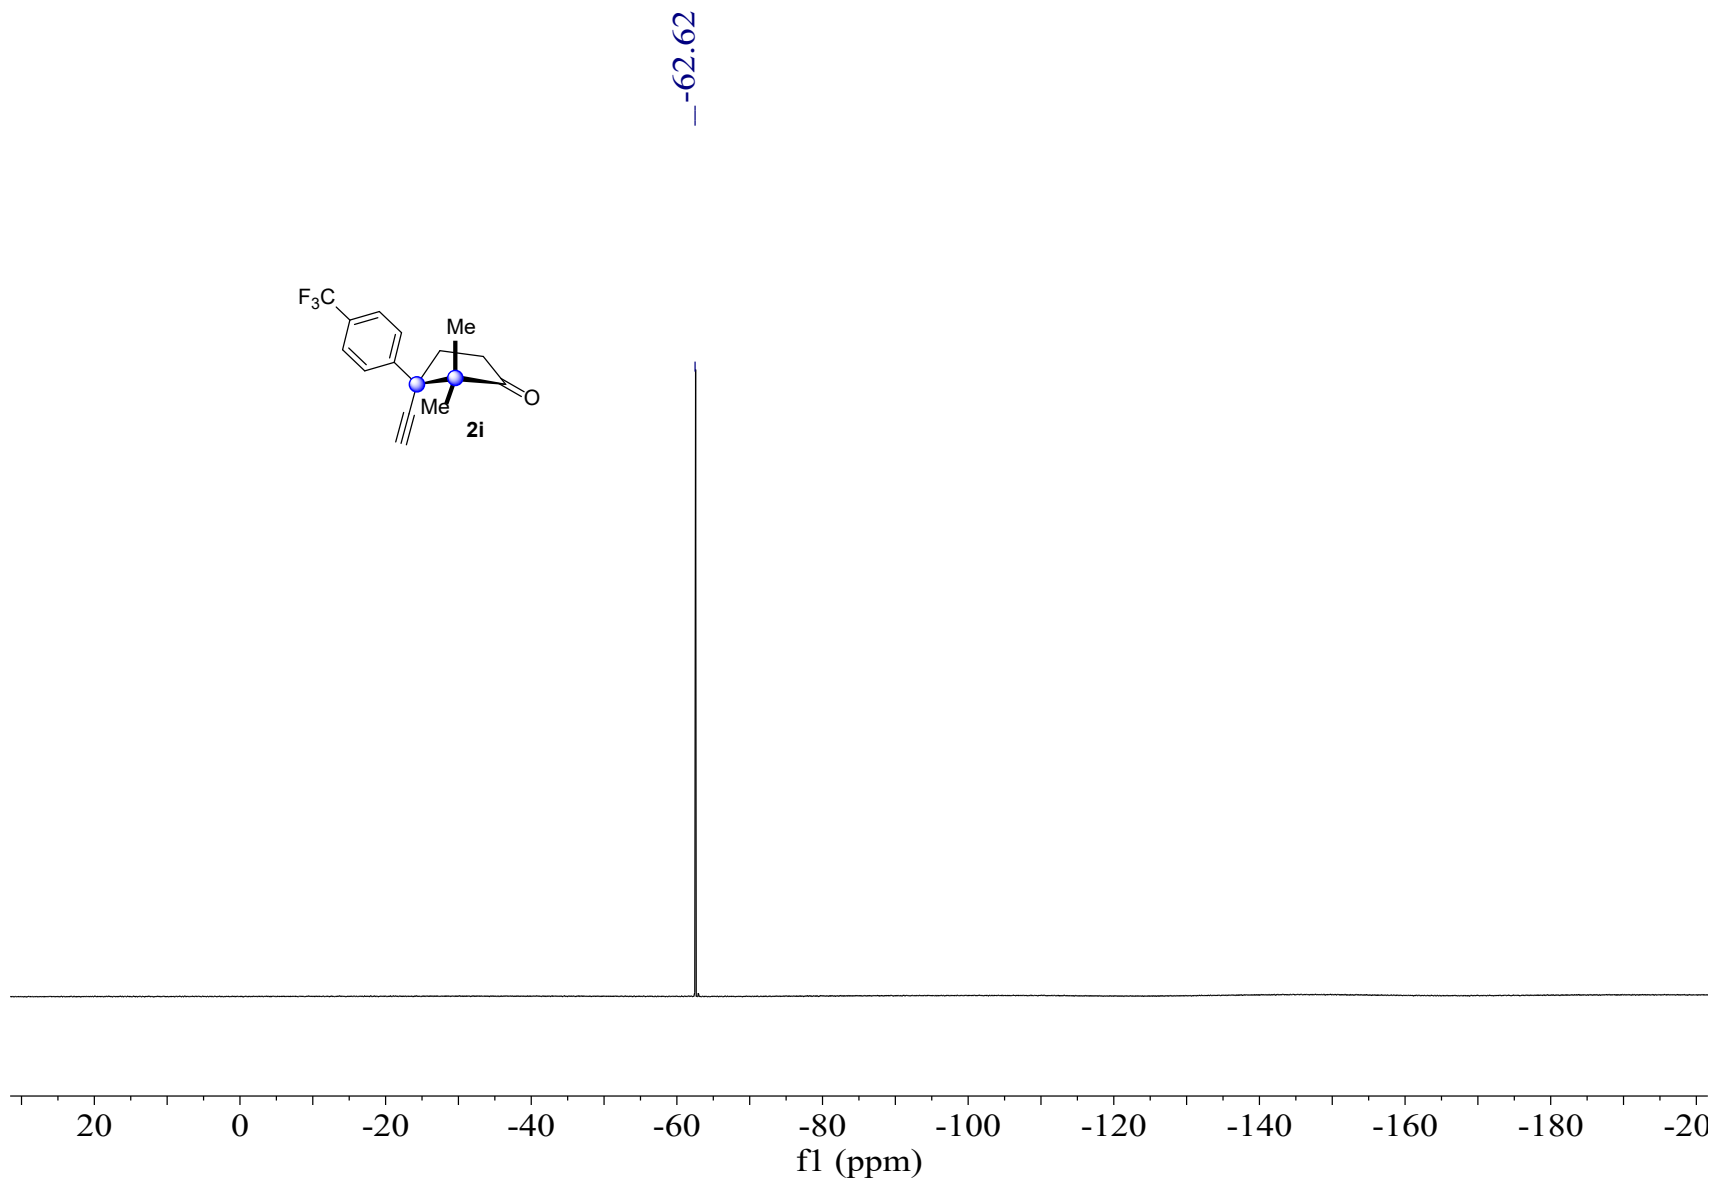

<sup>19</sup>F NMR spectrum of compound **2i**

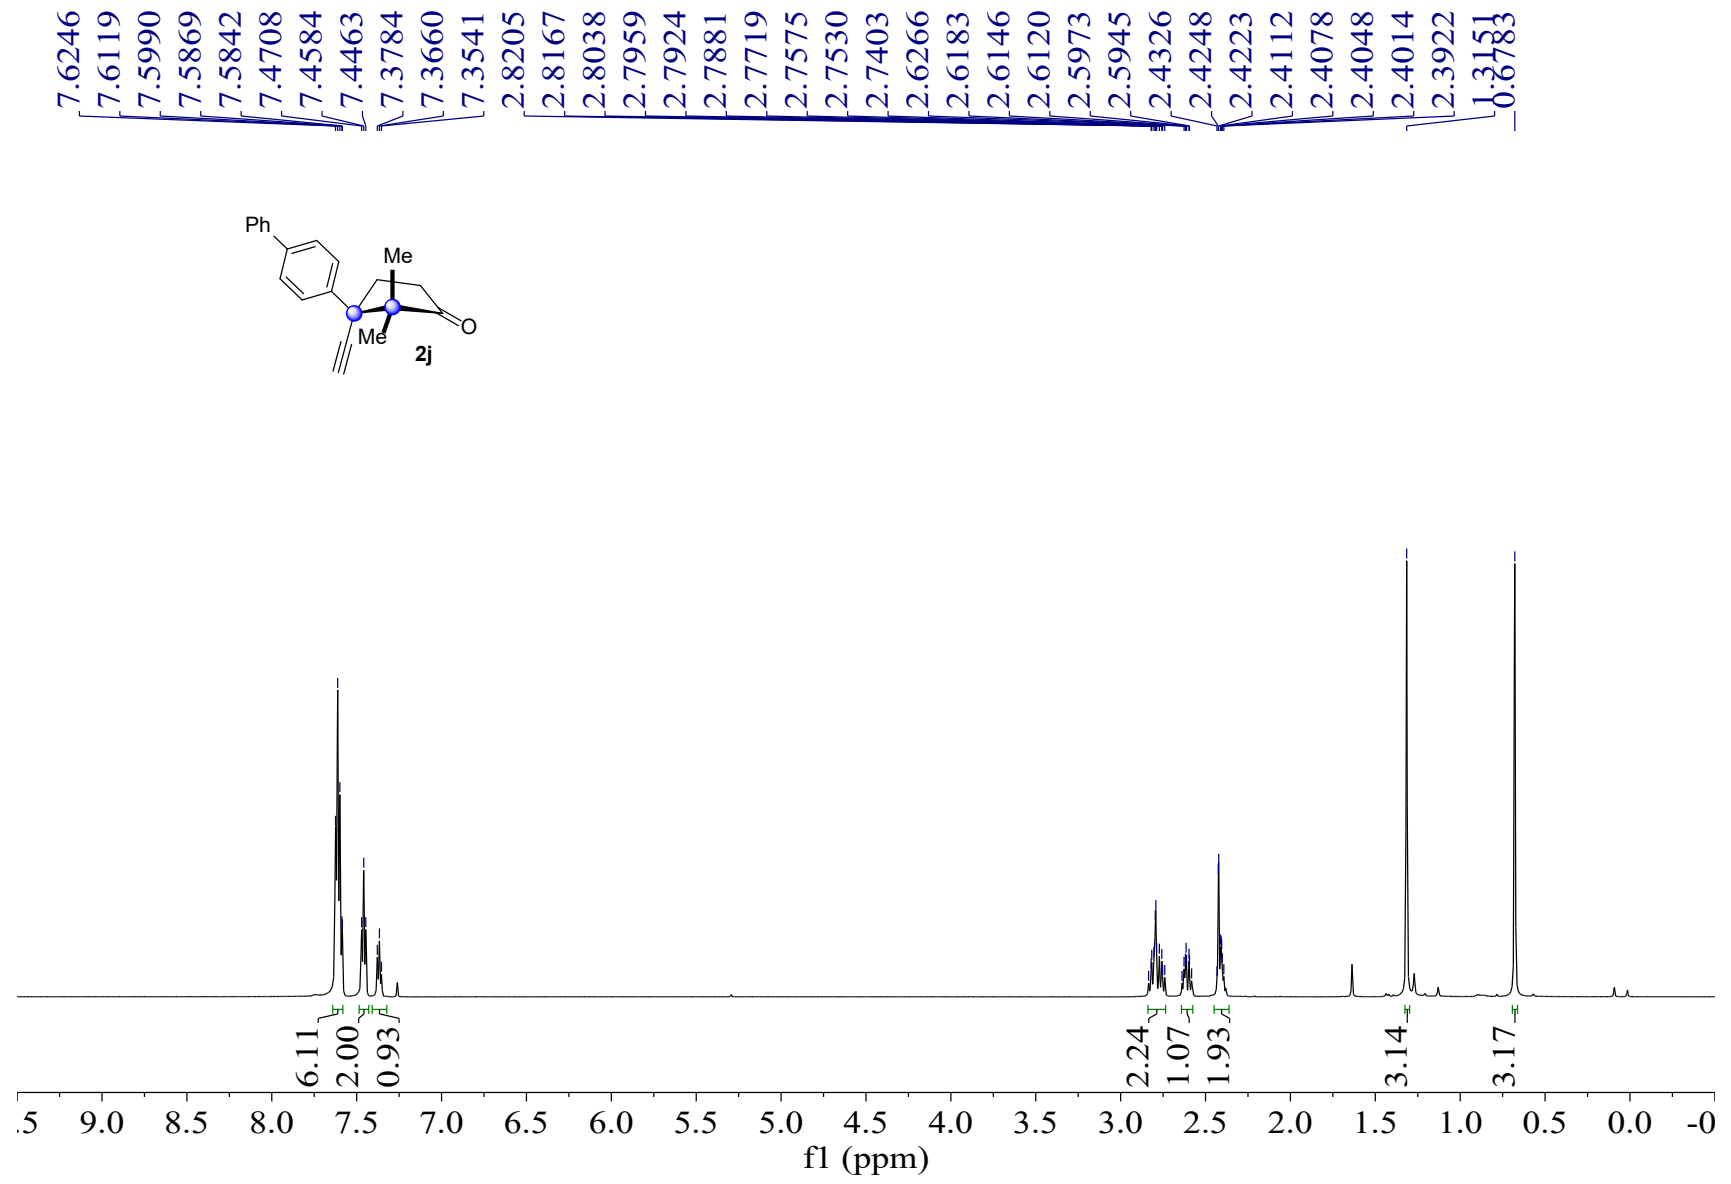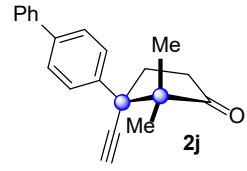

<sup>1</sup>H NMR spectrum of compound 2j

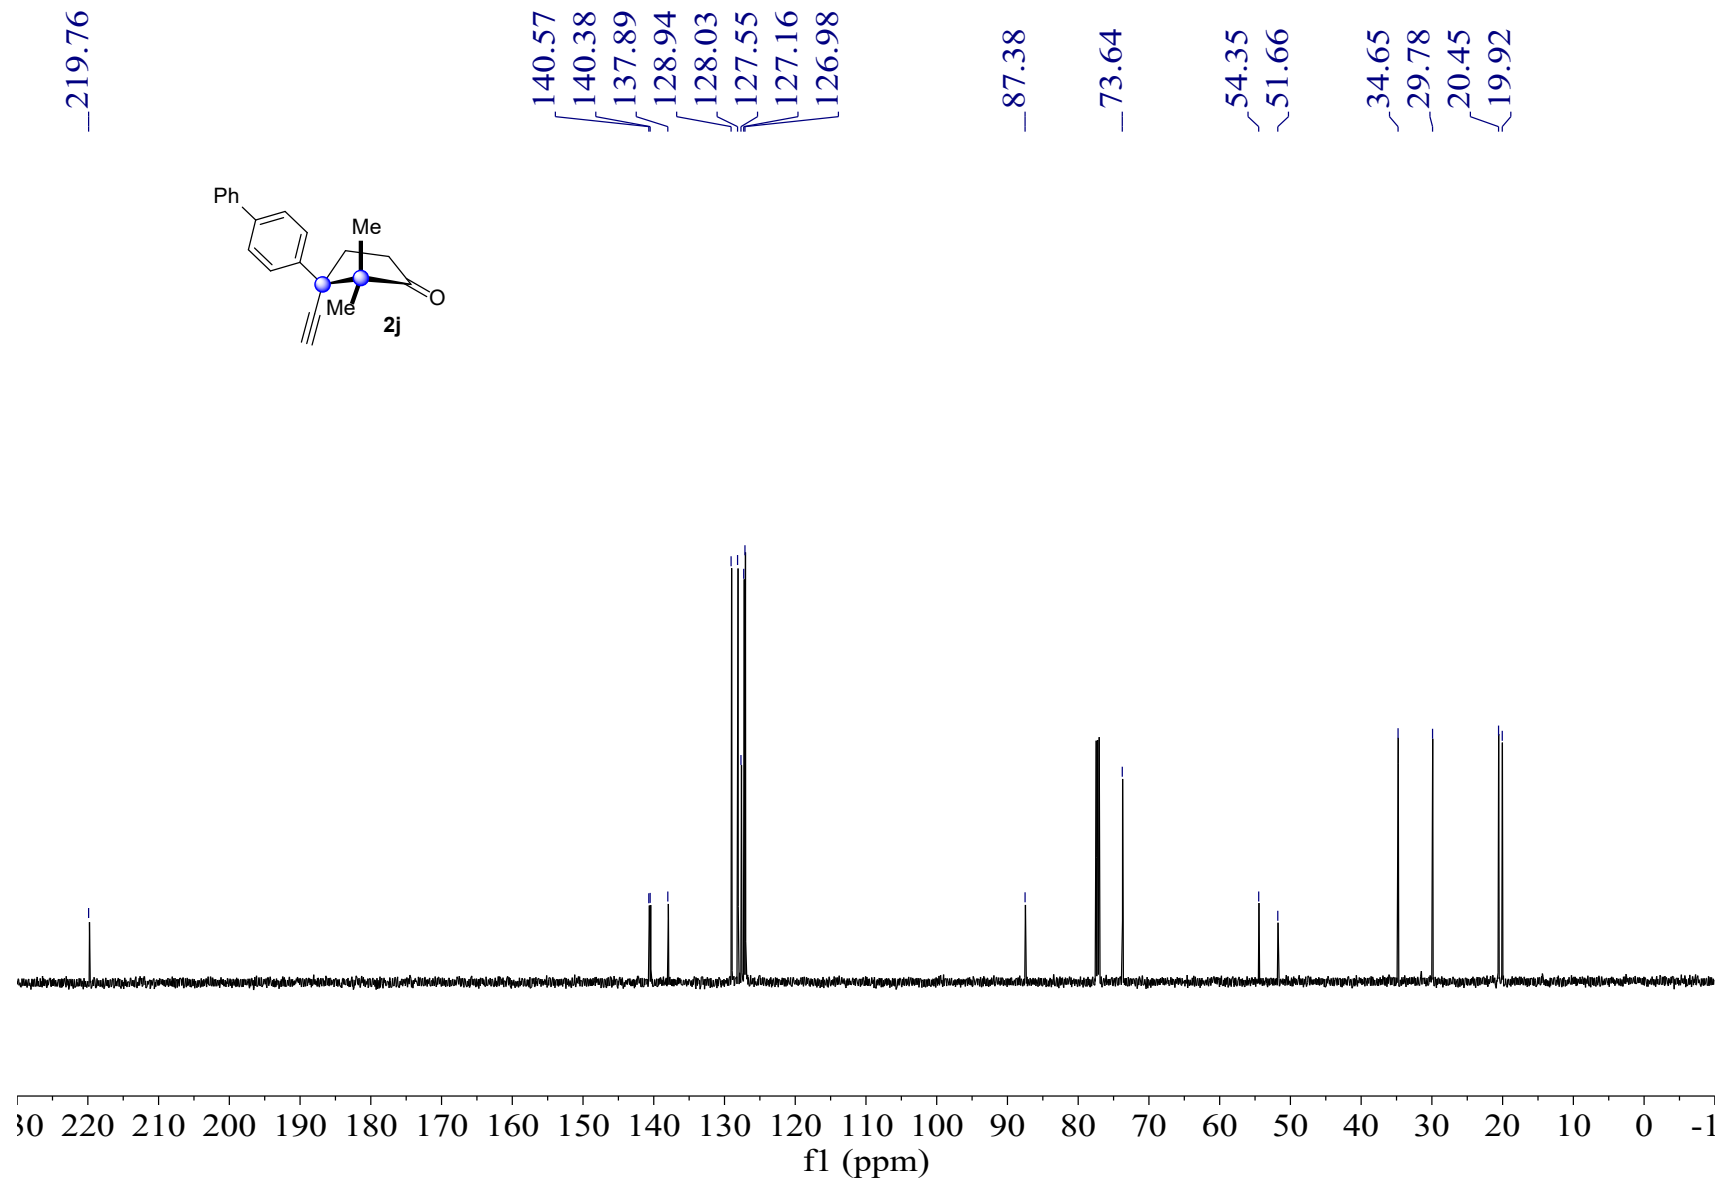

<sup>13</sup>C NMR spectrum of compound **2j**

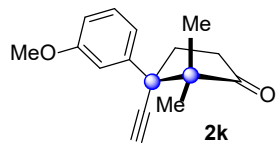

7.3046  
7.2914  
7.2778  
7.0857  
7.0741  
6.8549  
6.8420

3.8274  
2.7634  
2.7559  
2.7456  
2.7377  
2.7341  
2.7224  
2.7167  
2.7132  
2.6986  
2.6950  
2.5960  
2.5905  
2.5755  
2.5708  
2.5515  
2.5296  
2.3799  
2.3690  
2.3601  
2.3570  
2.3530  
2.3455  
2.3402  
2.3250  
1.2772  
0.6249

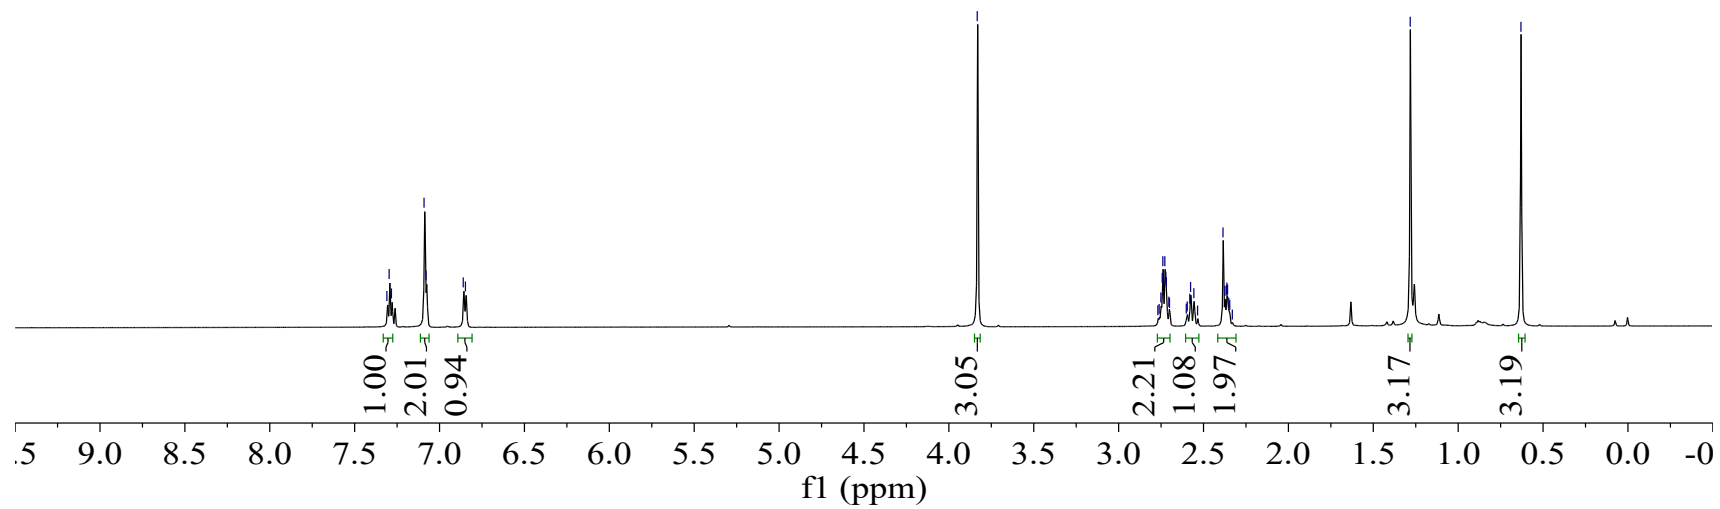

<sup>1</sup>H NMR spectrum of compound **2k**

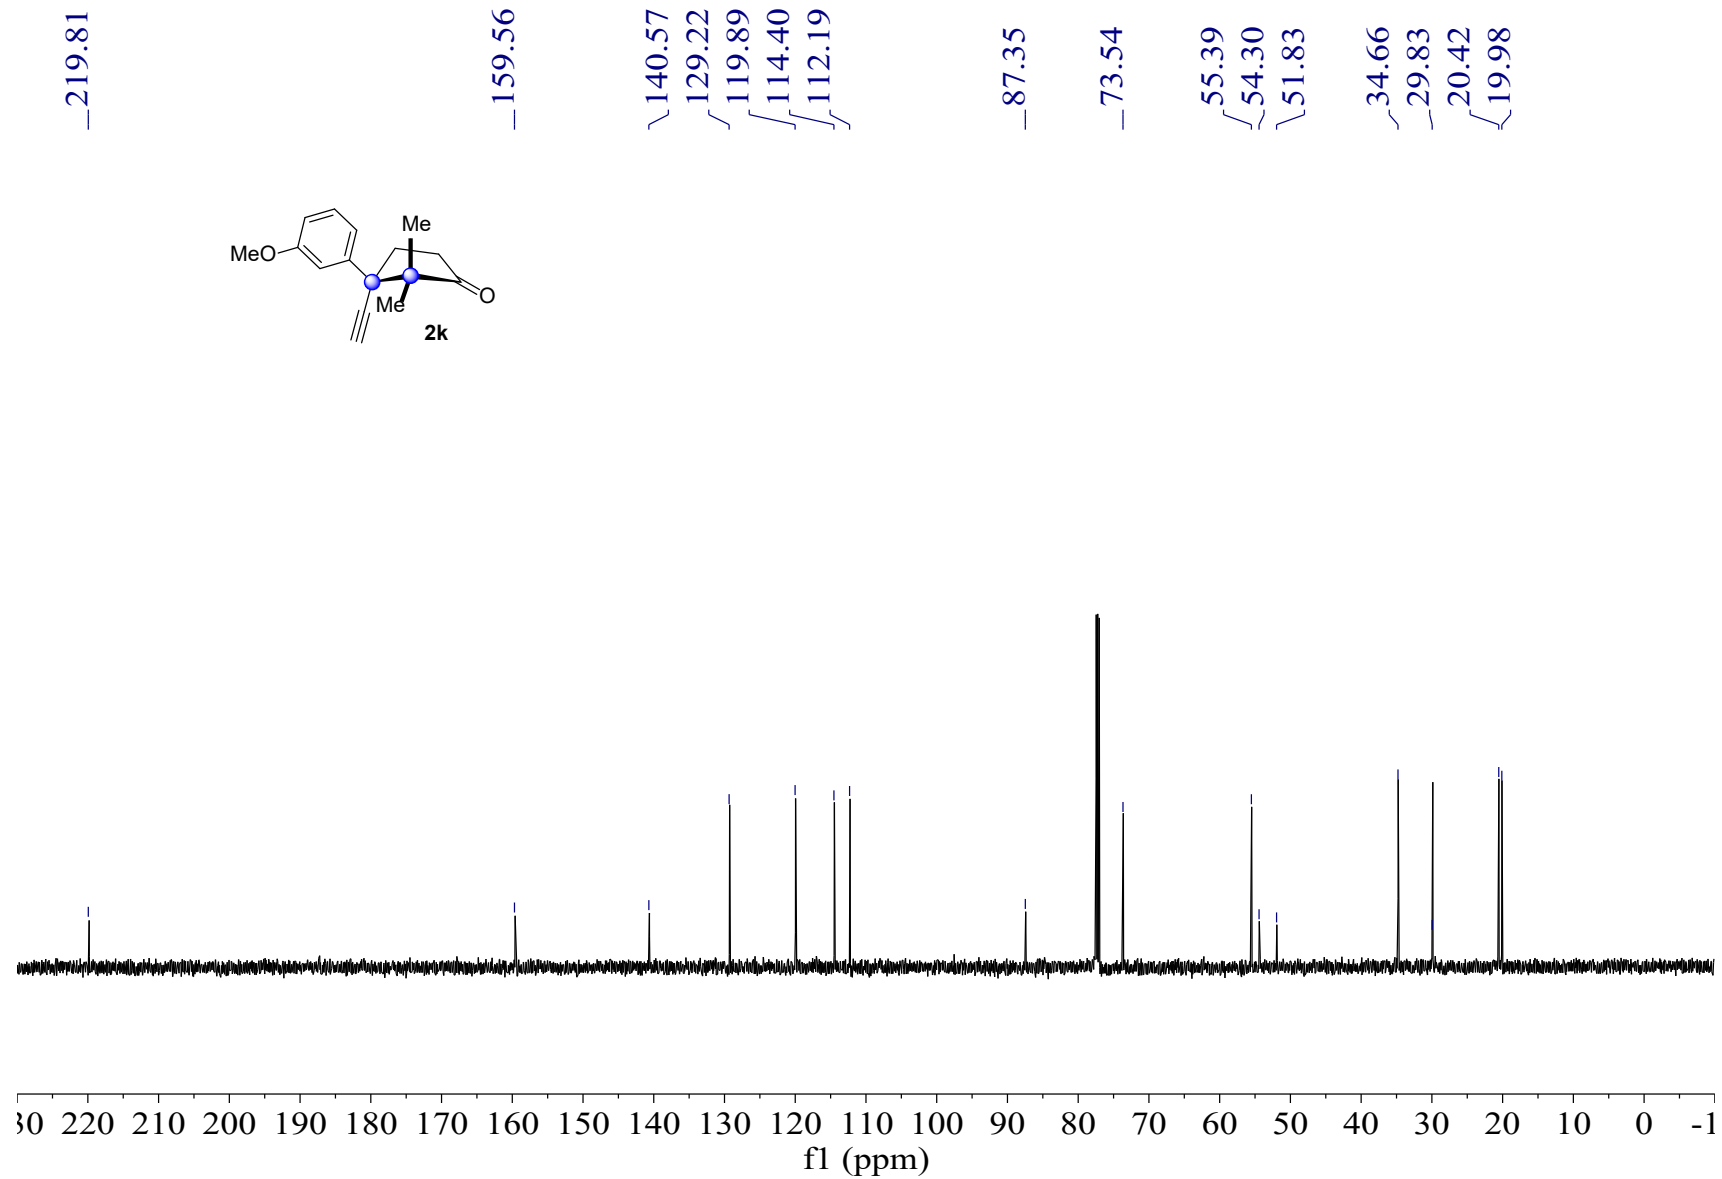

<sup>13</sup>C NMR spectrum of compound **2k**

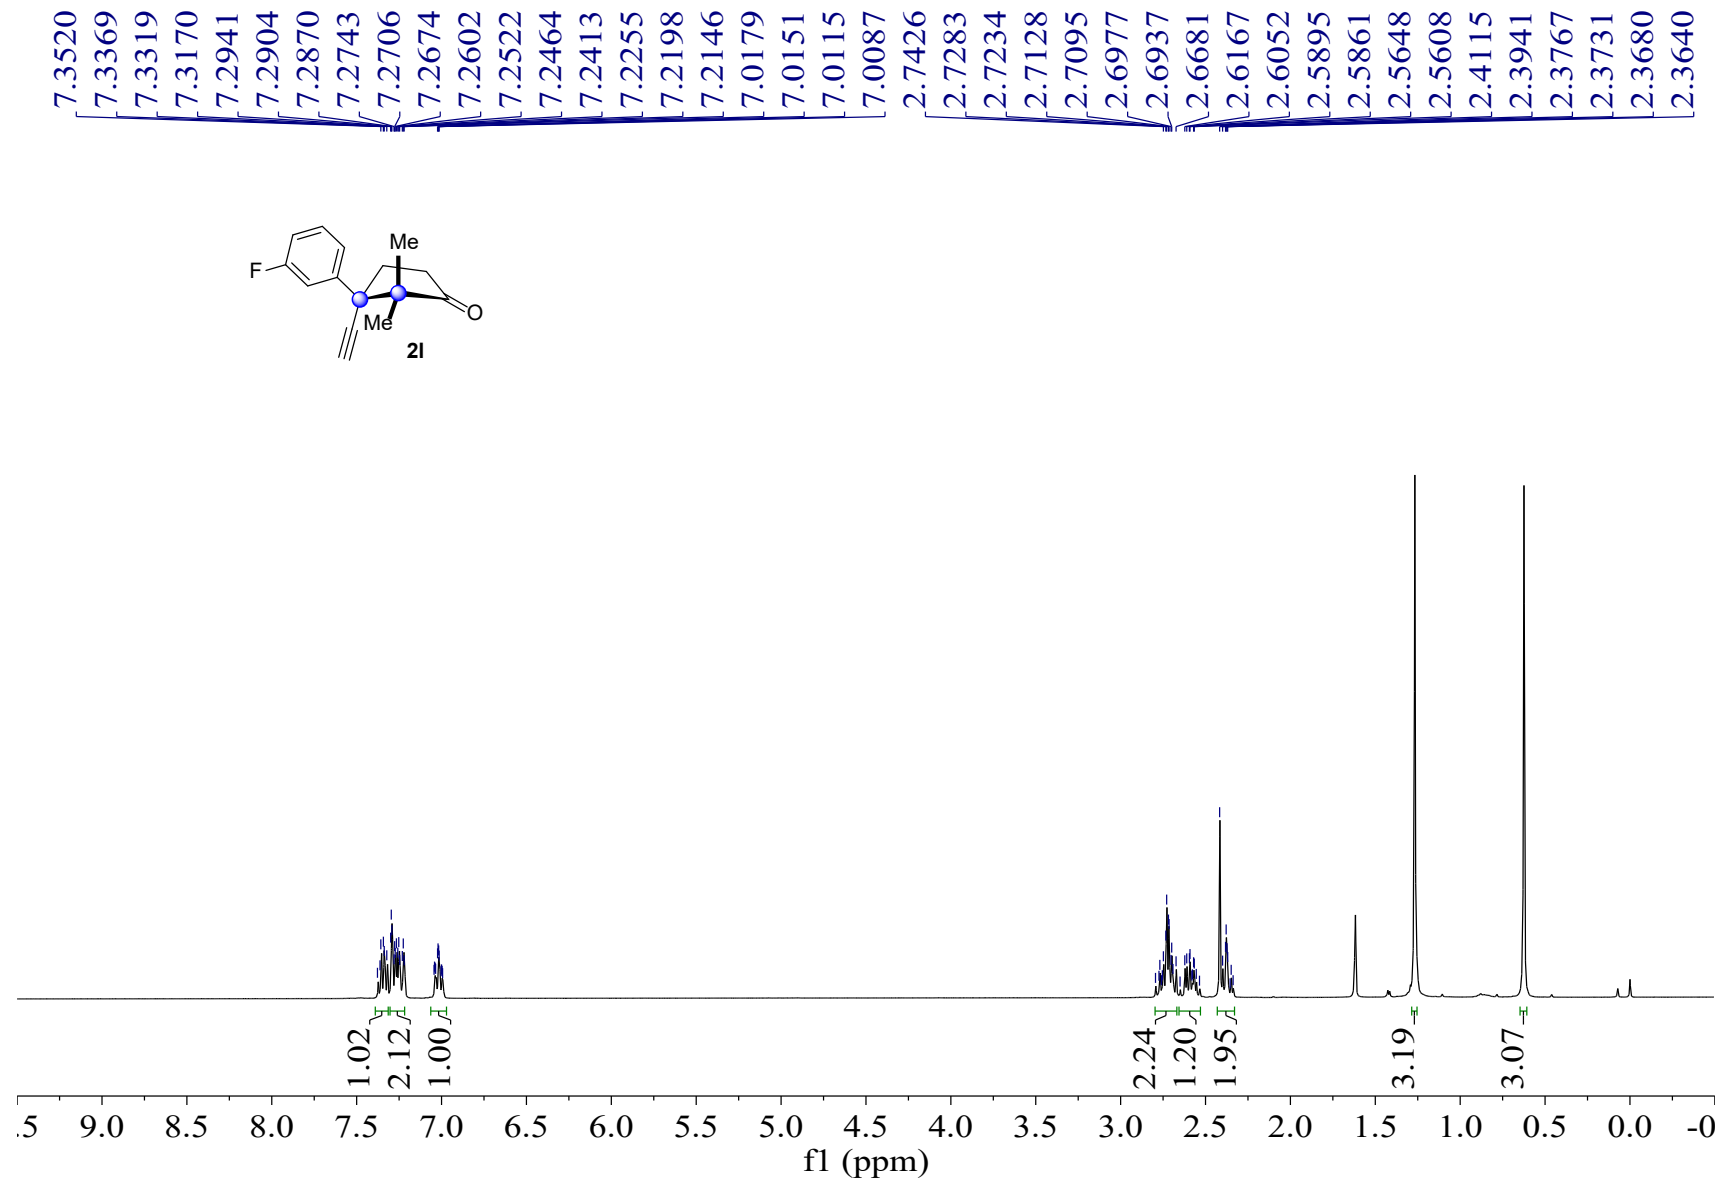

<sup>1</sup>H NMR spectrum of compound **2I**

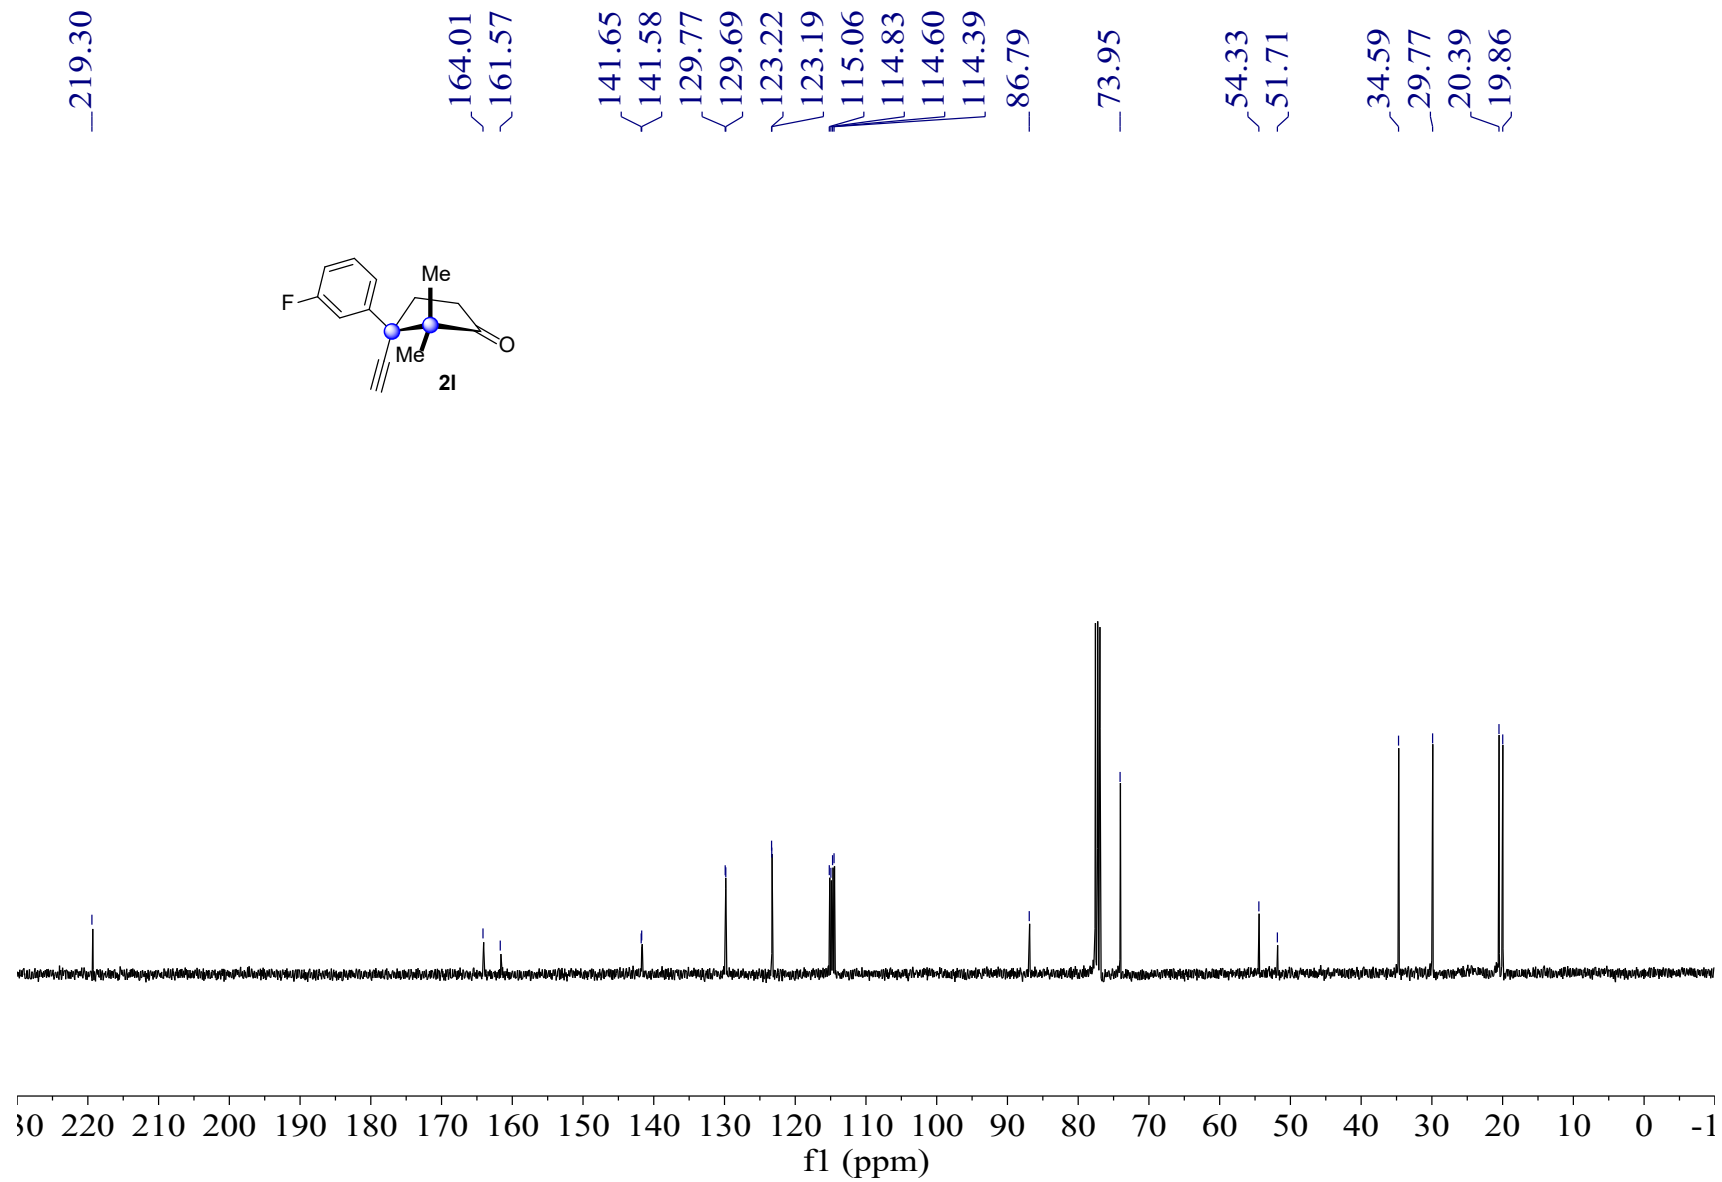

<sup>13</sup>C NMR spectrum of compound **2l**

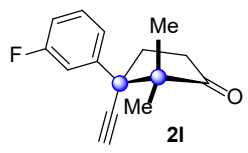

-112.81

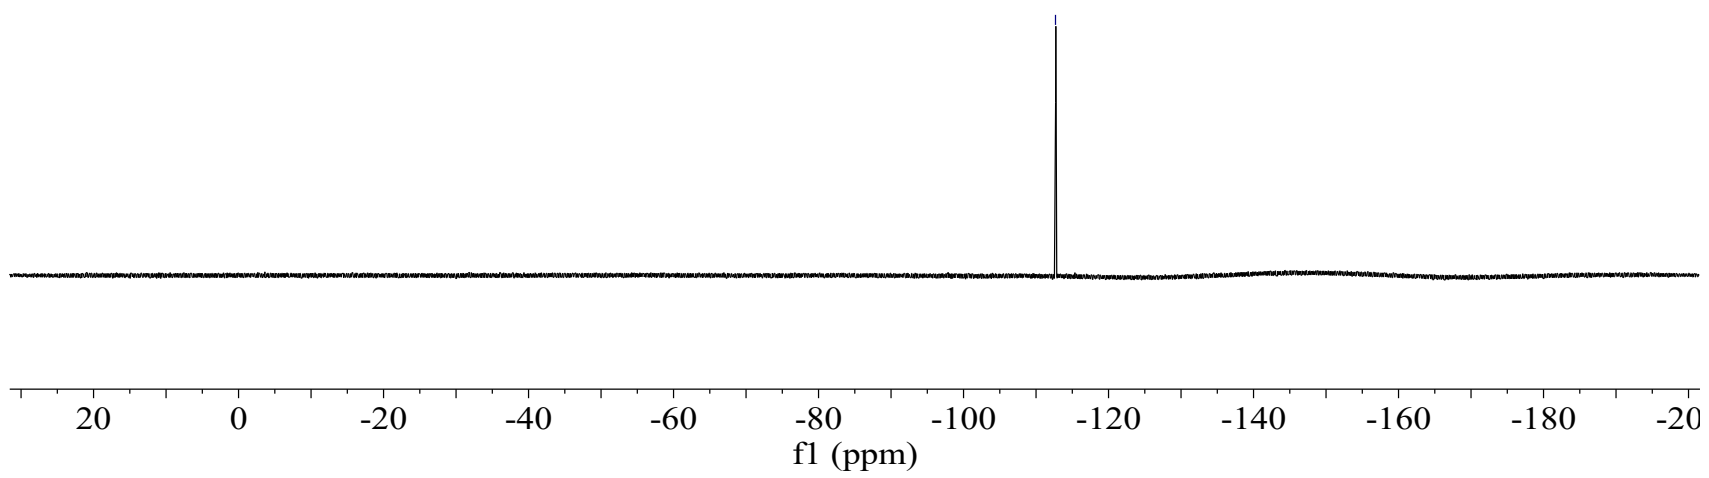

<sup>19</sup>F NMR spectrum of compound **21**



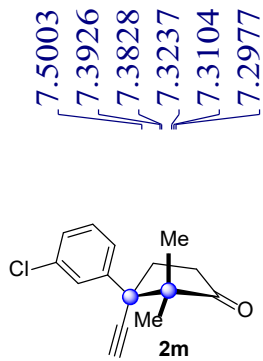

2.7656  
2.7485  
2.7347  
2.7198  
2.7120  
2.6994  
2.6819  
2.6203  
2.6003  
2.5937  
2.5805  
2.5640  
2.5533  
2.5415  
2.4144  
2.3867  
2.3748  
2.3596  
2.3399  
2.3330

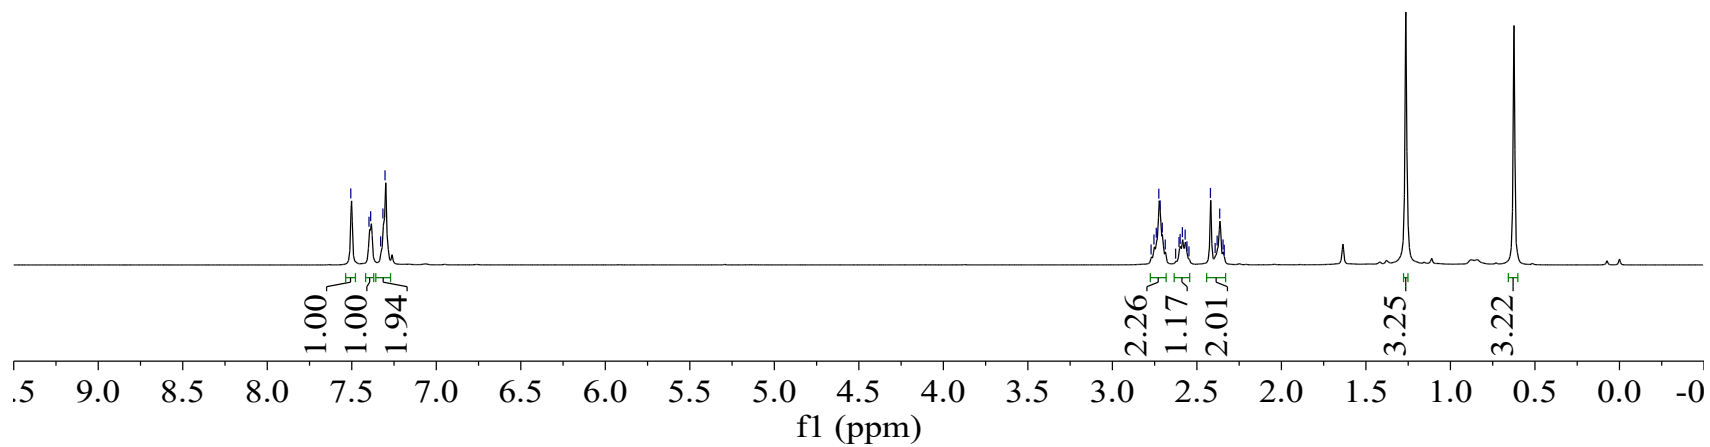

$^1\text{H}$  NMR spectrum of compound **2m**

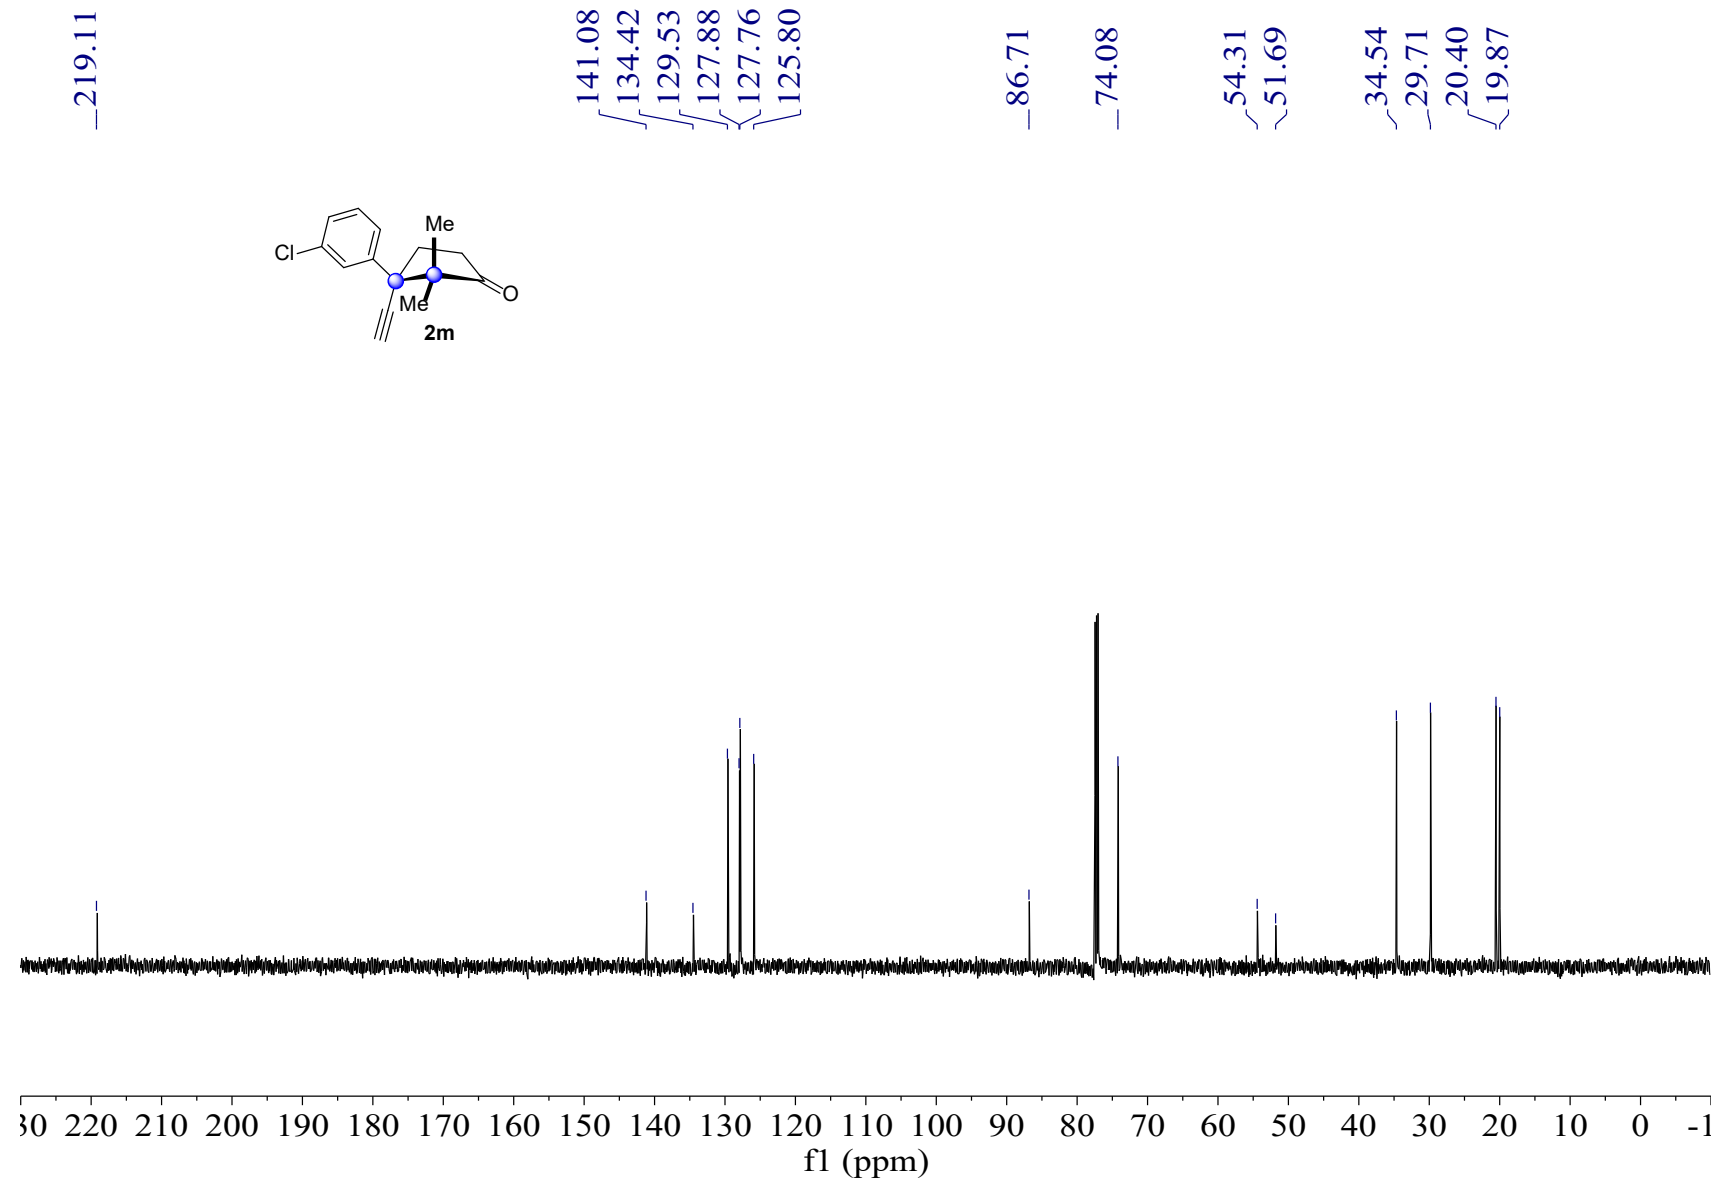

<sup>13</sup>C NMR spectrum of compound **2m**

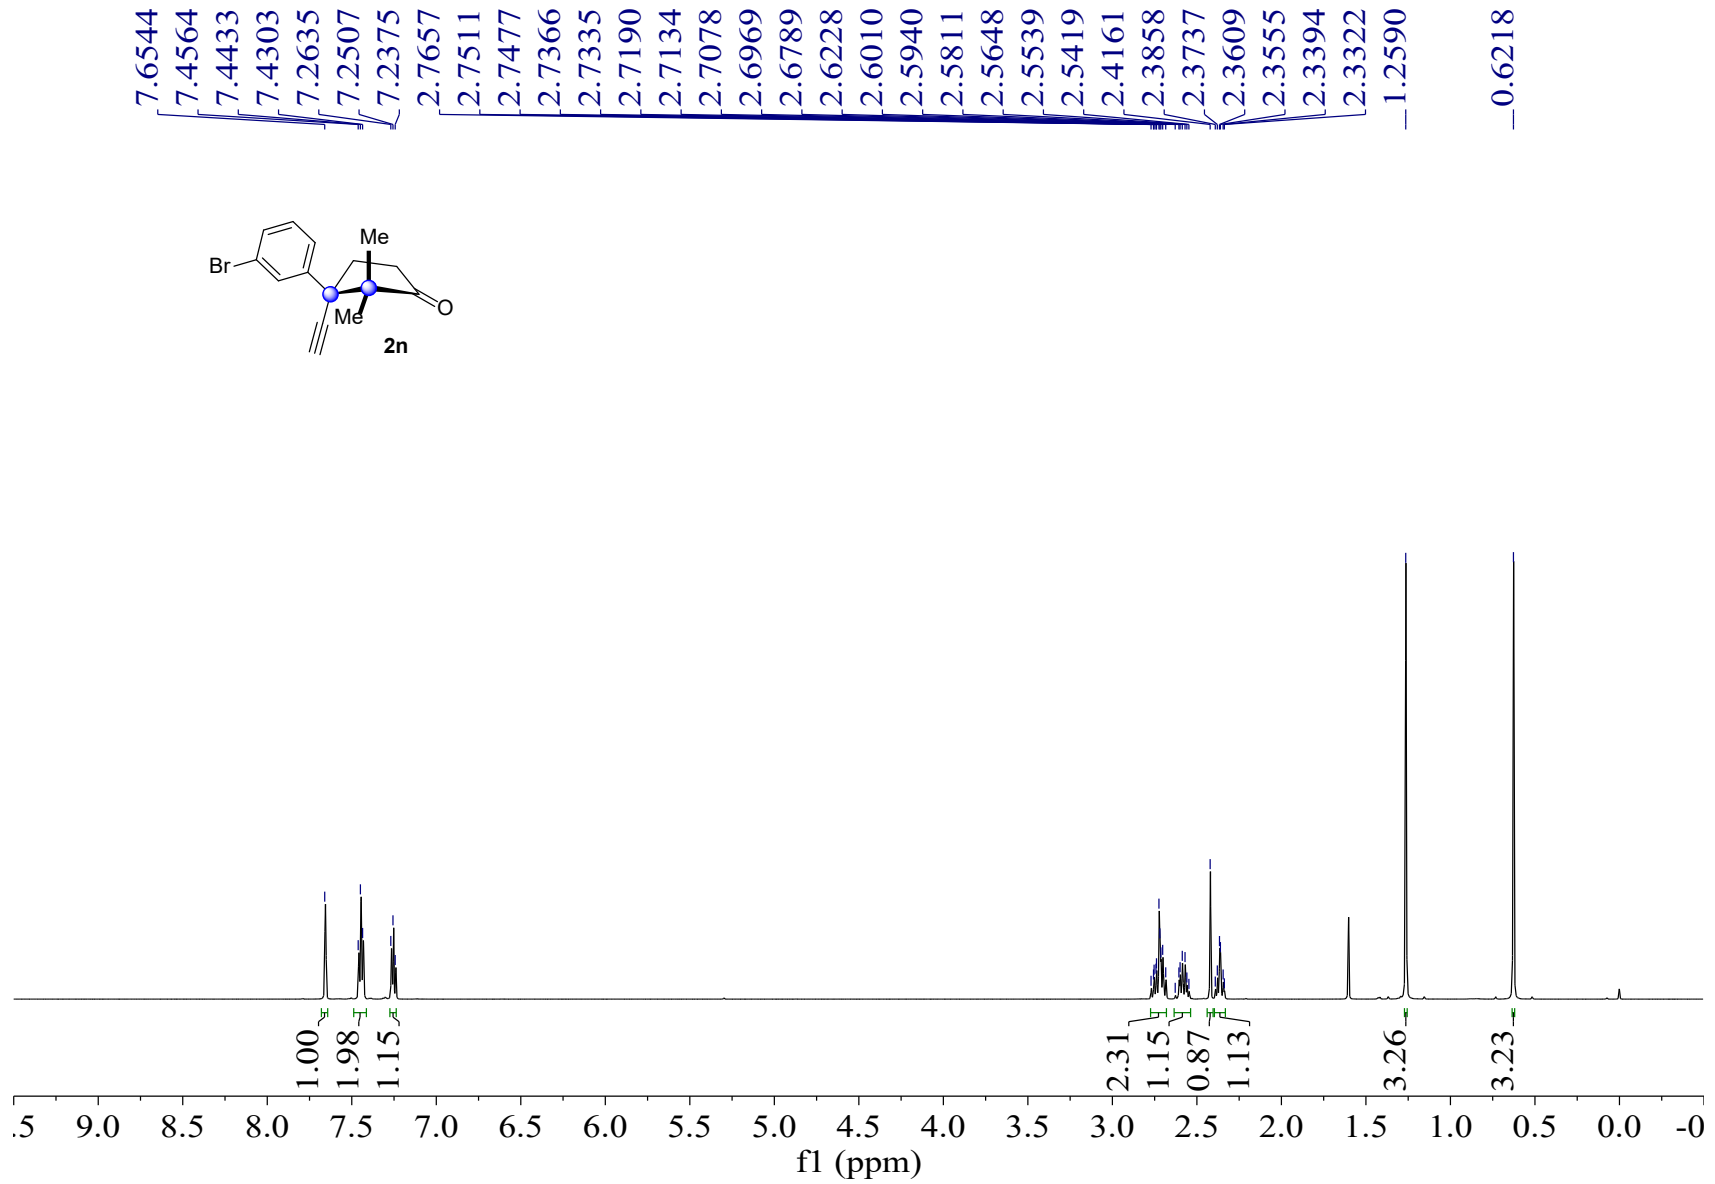

<sup>1</sup>H NMR spectrum of compound **2n**

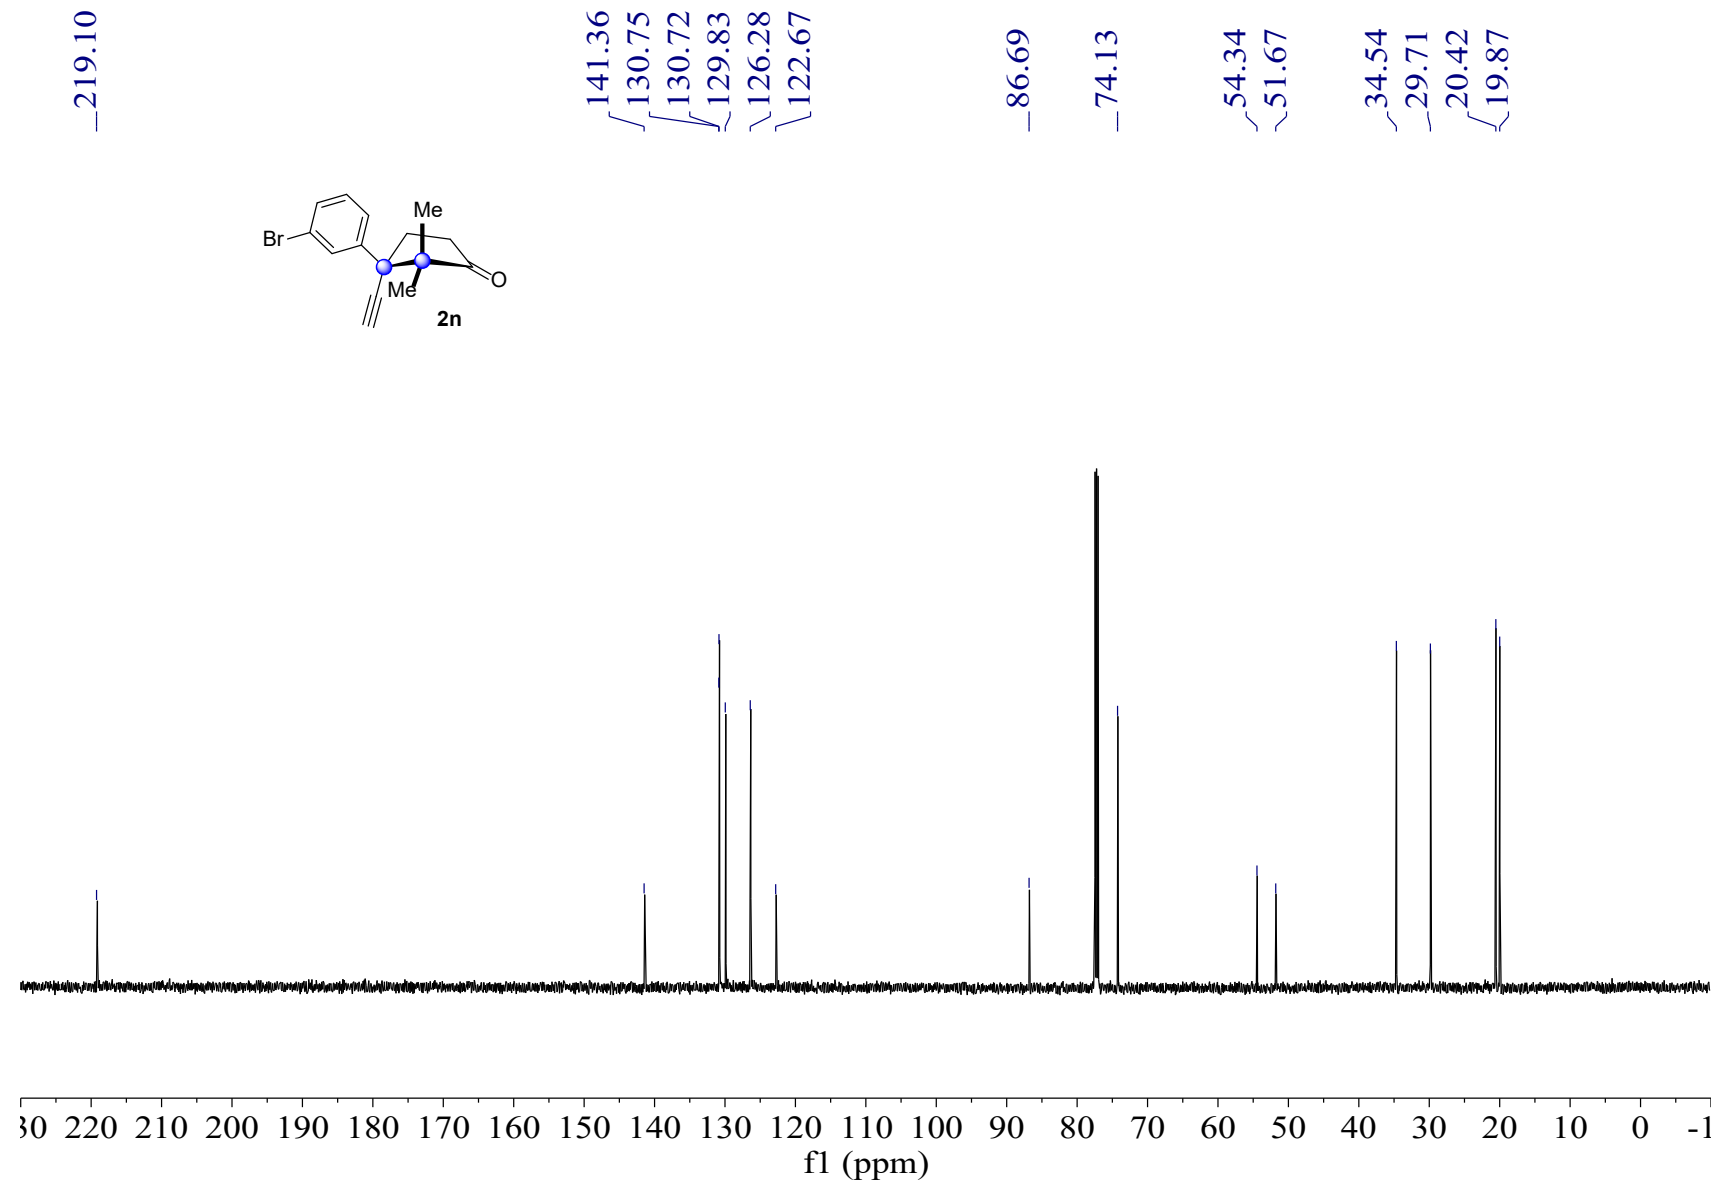

<sup>13</sup>C NMR spectrum of compound **2n**

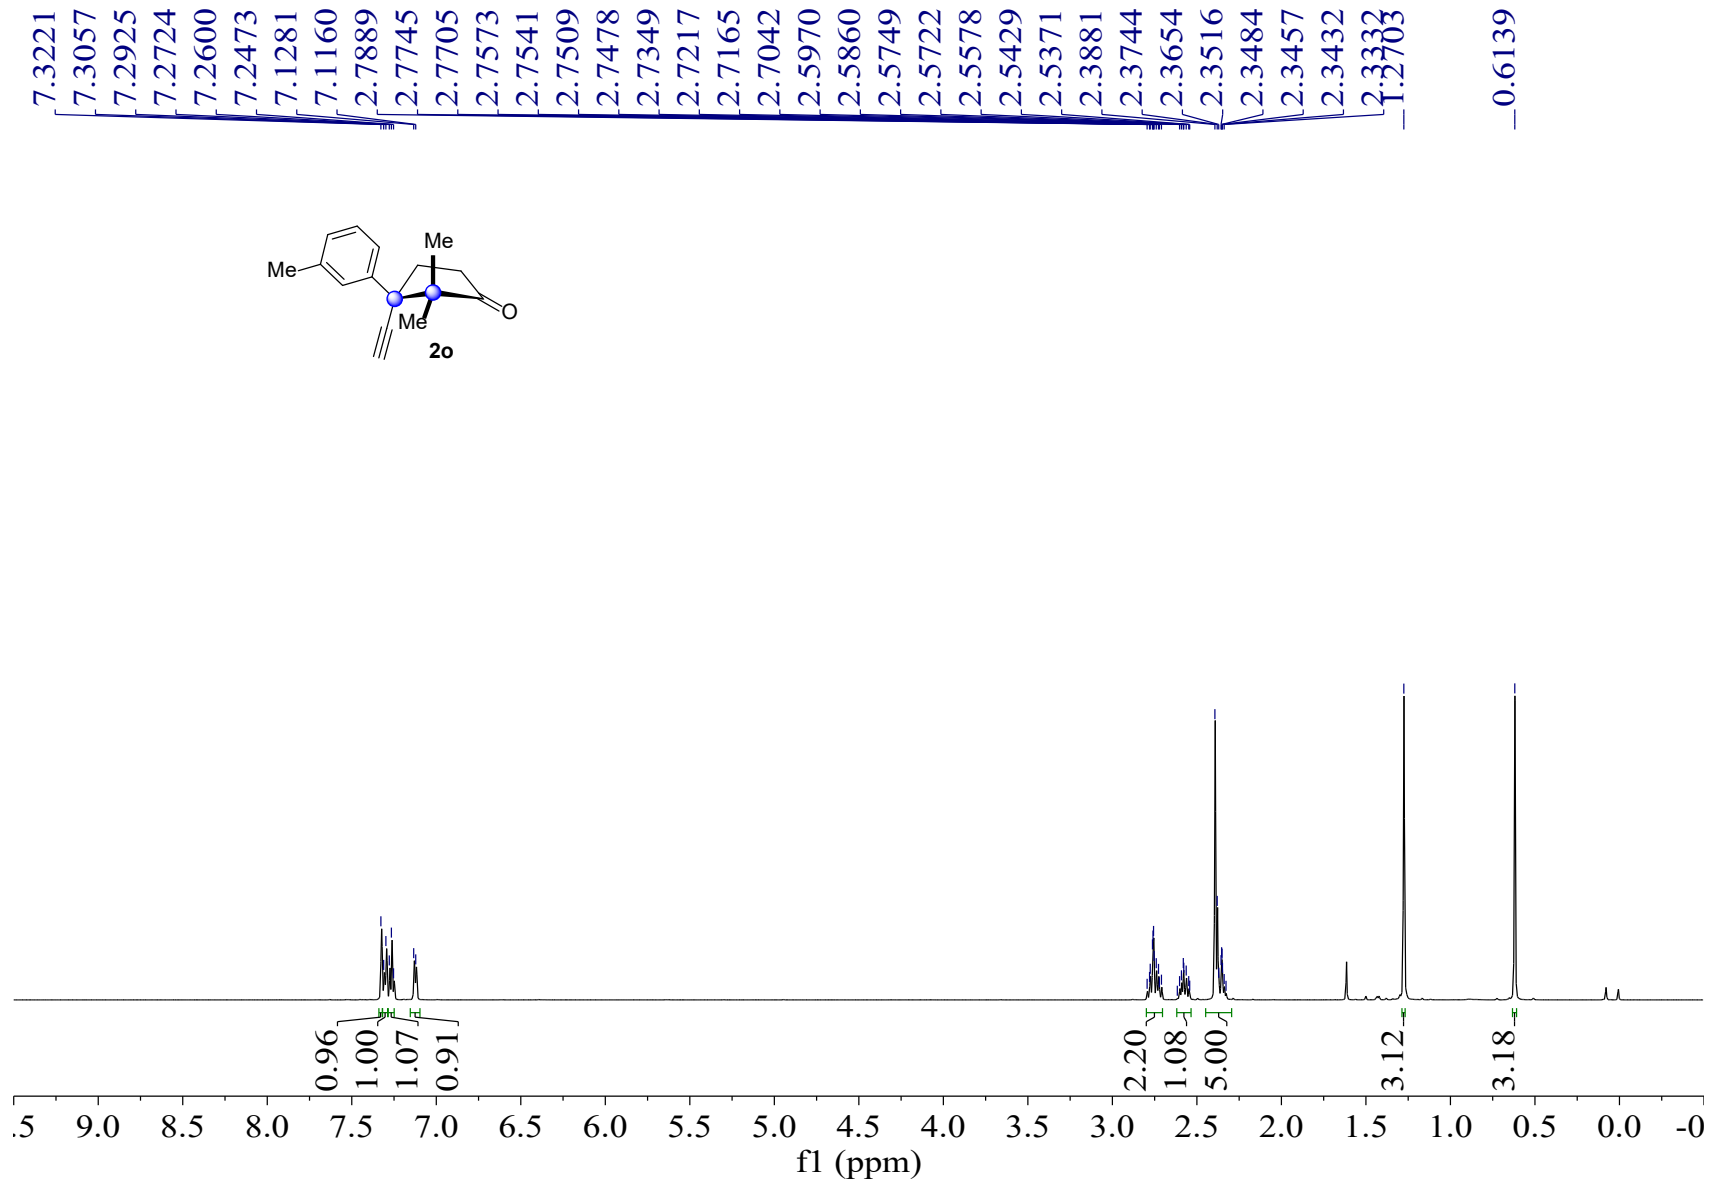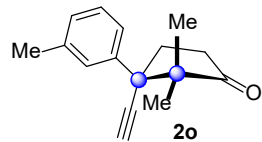

<sup>1</sup>H NMR spectrum of compound **2o**

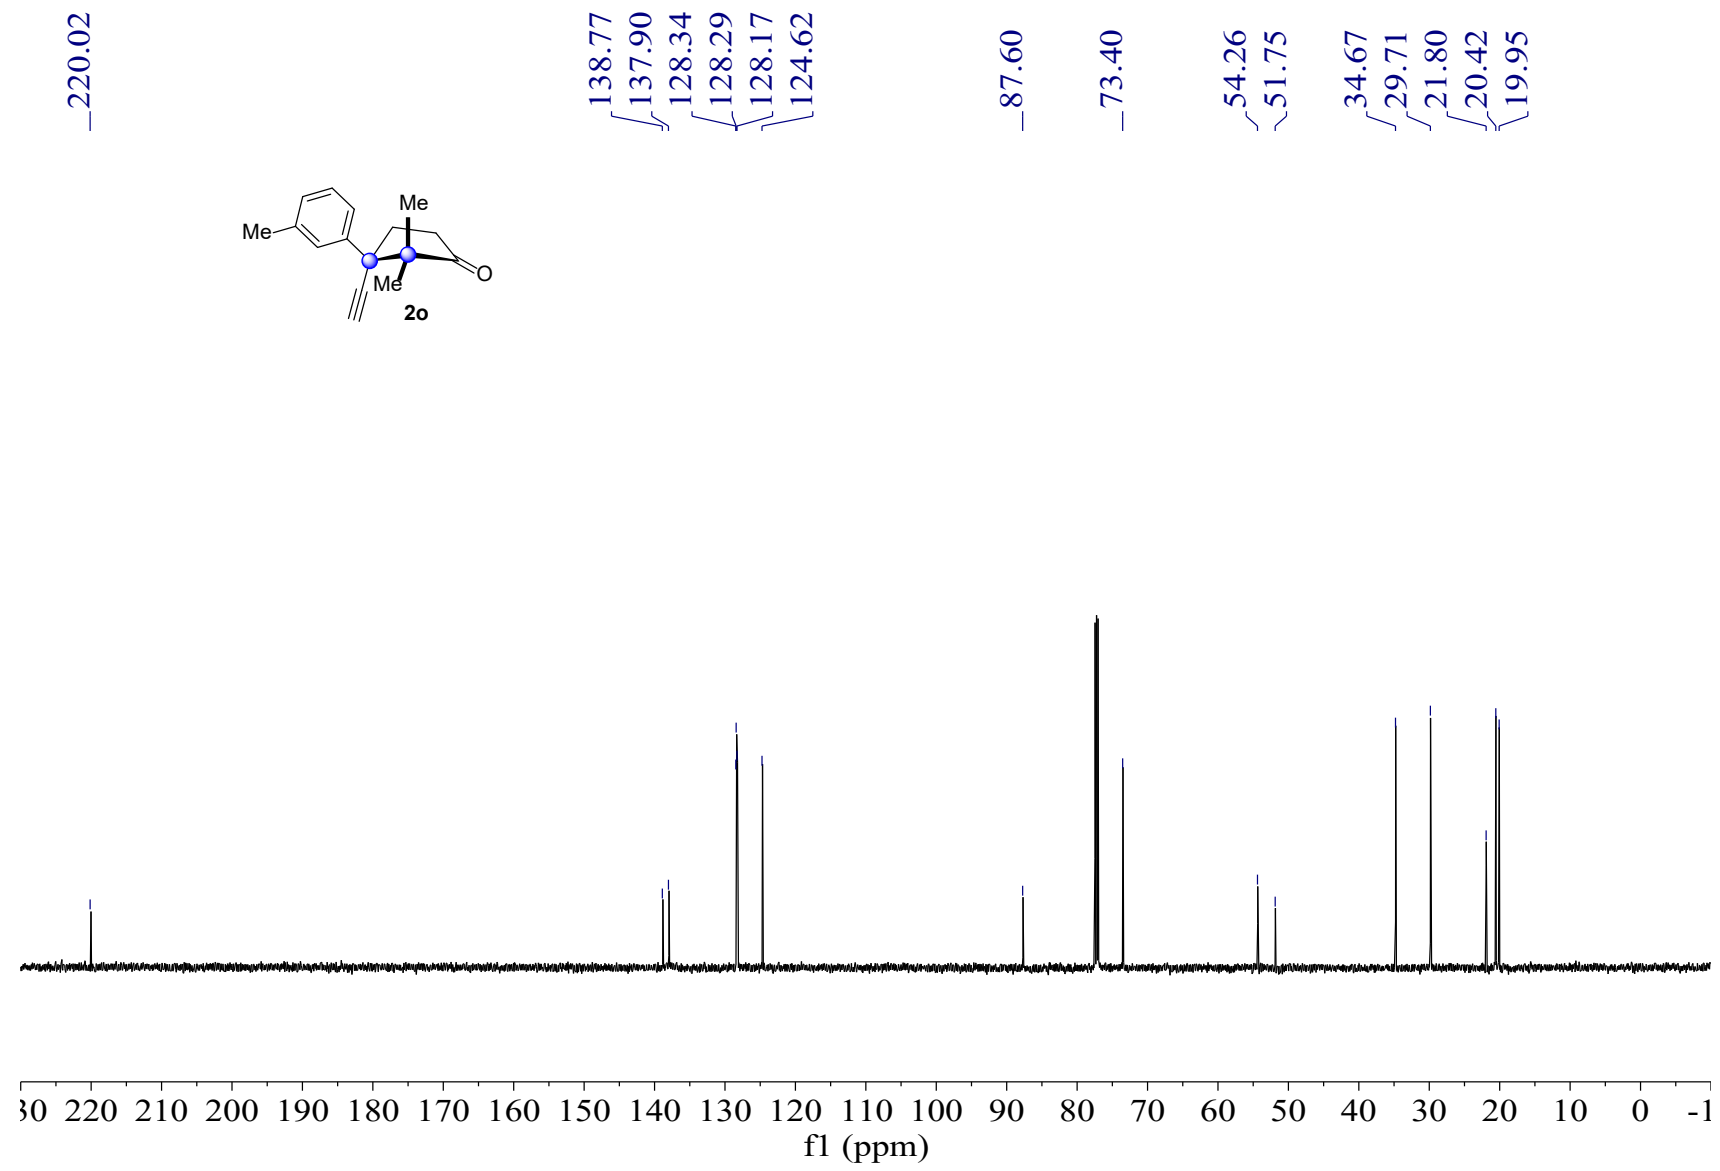

<sup>13</sup>C NMR spectrum of compound **2o**

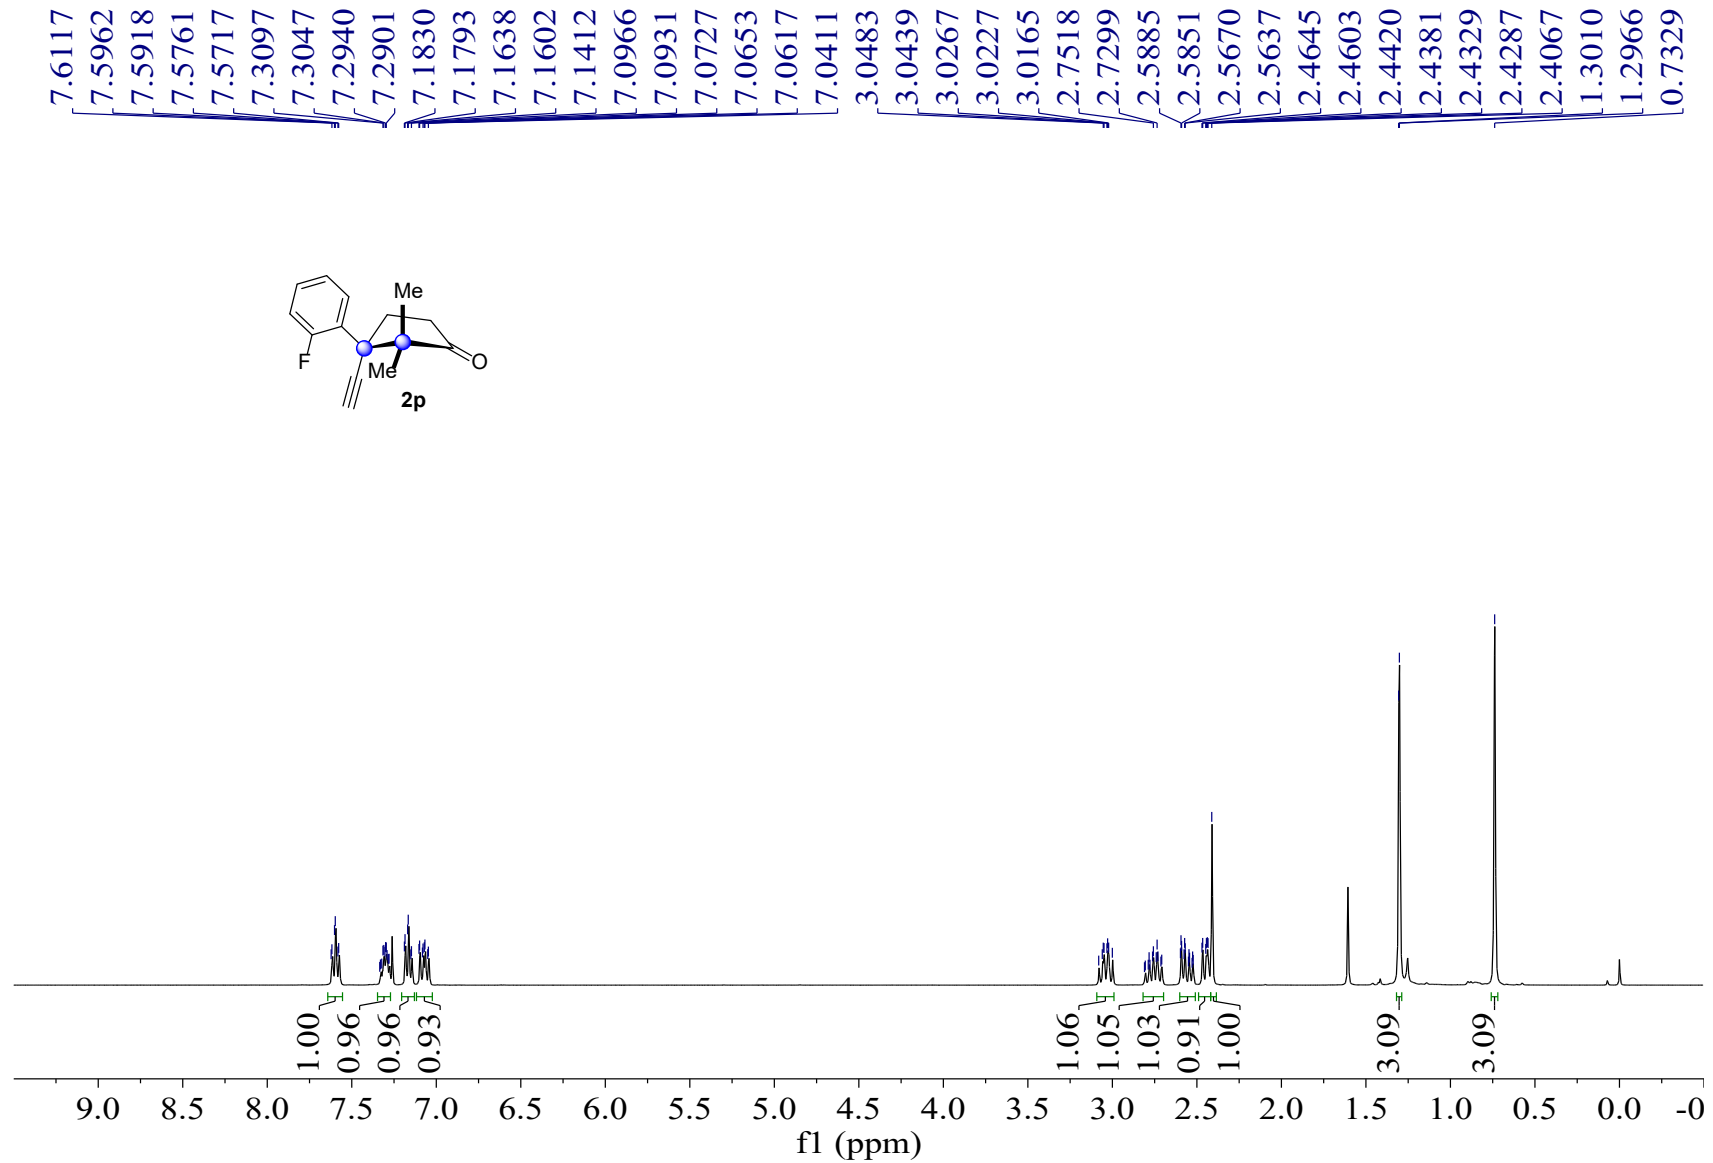

<sup>1</sup>H NMR spectrum of compound **2p**

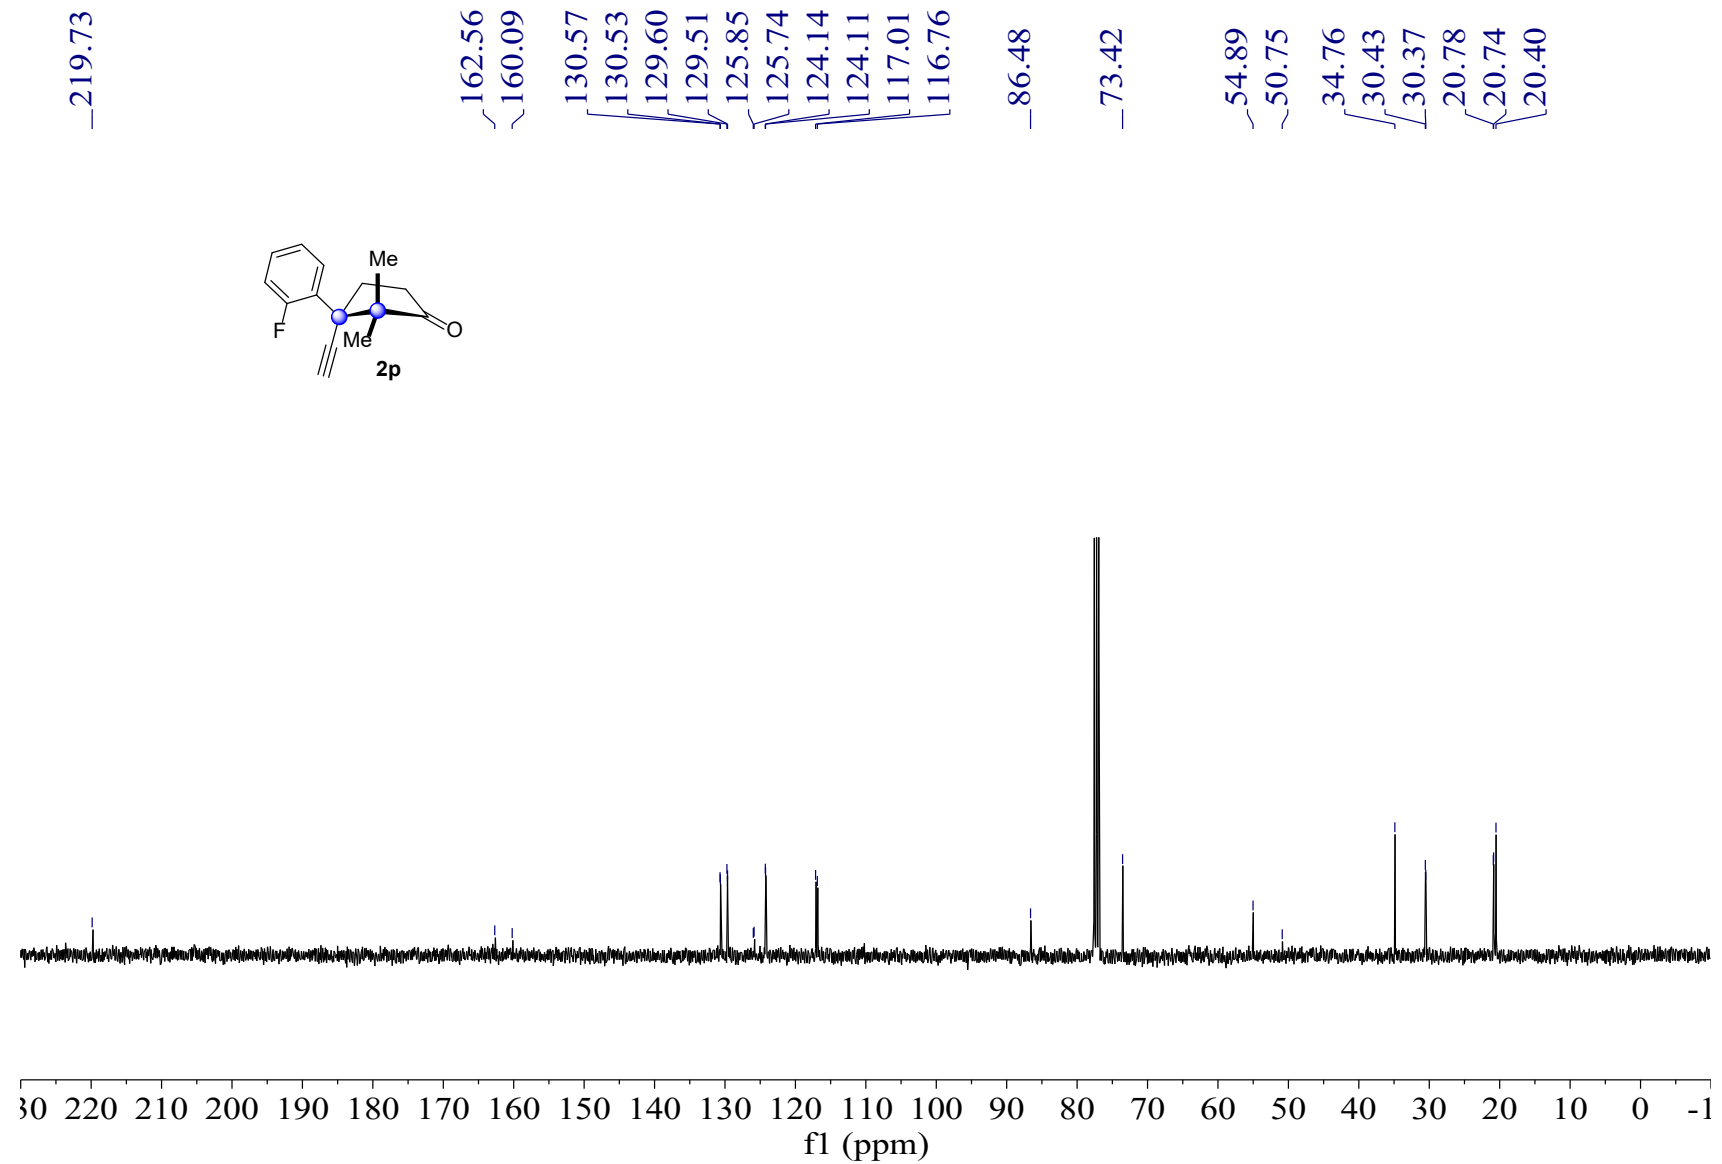

<sup>13</sup>C NMR spectrum of compound **2p**



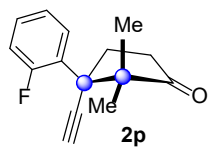

-106.68

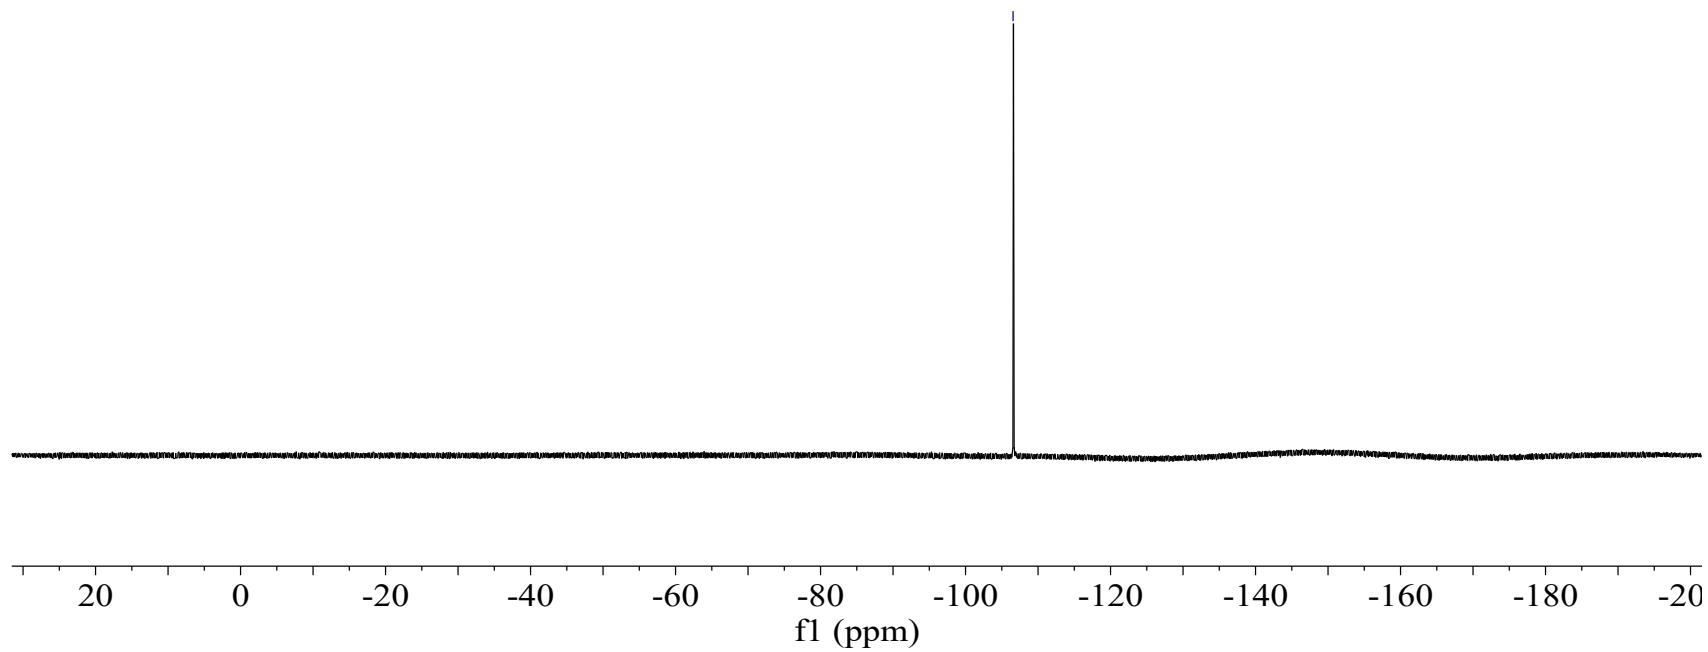

$^{19}\text{F}$  NMR spectrum of compound **2p**

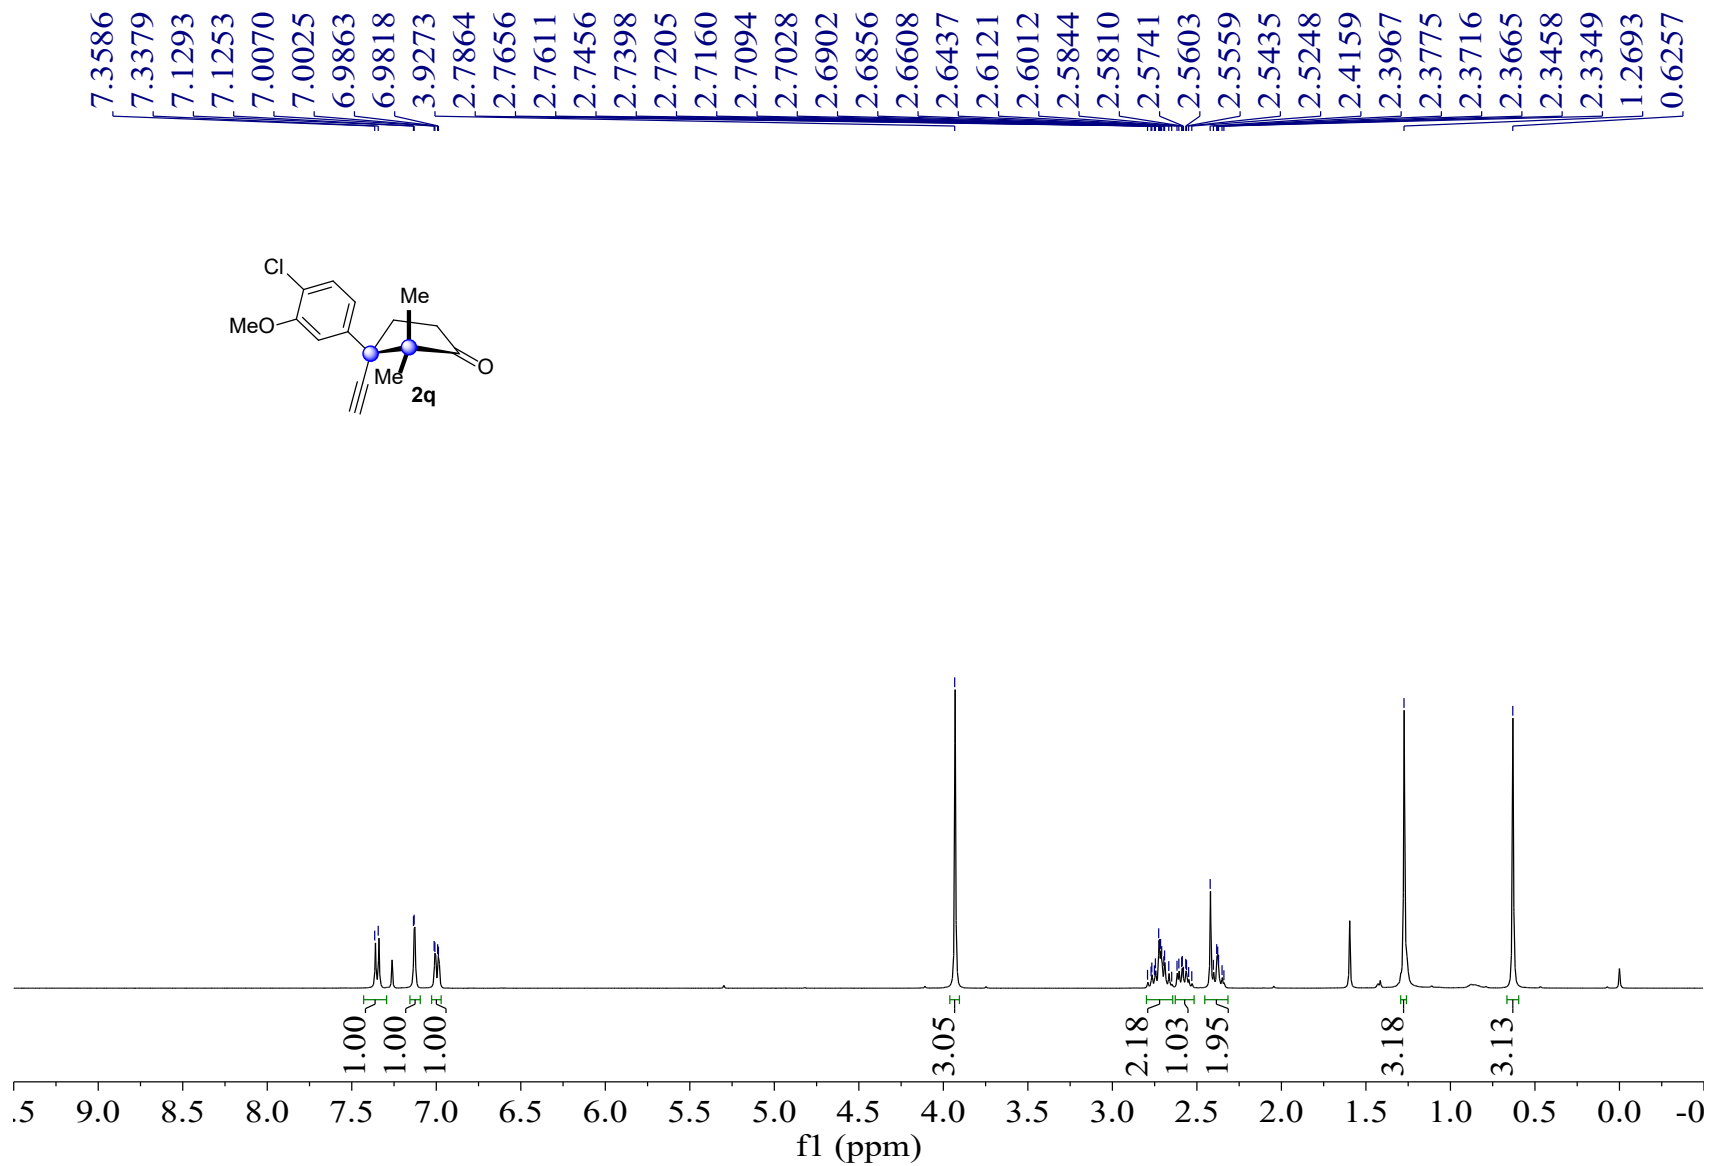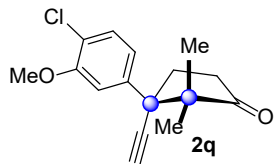

<sup>1</sup>H NMR spectrum of compound **2q**

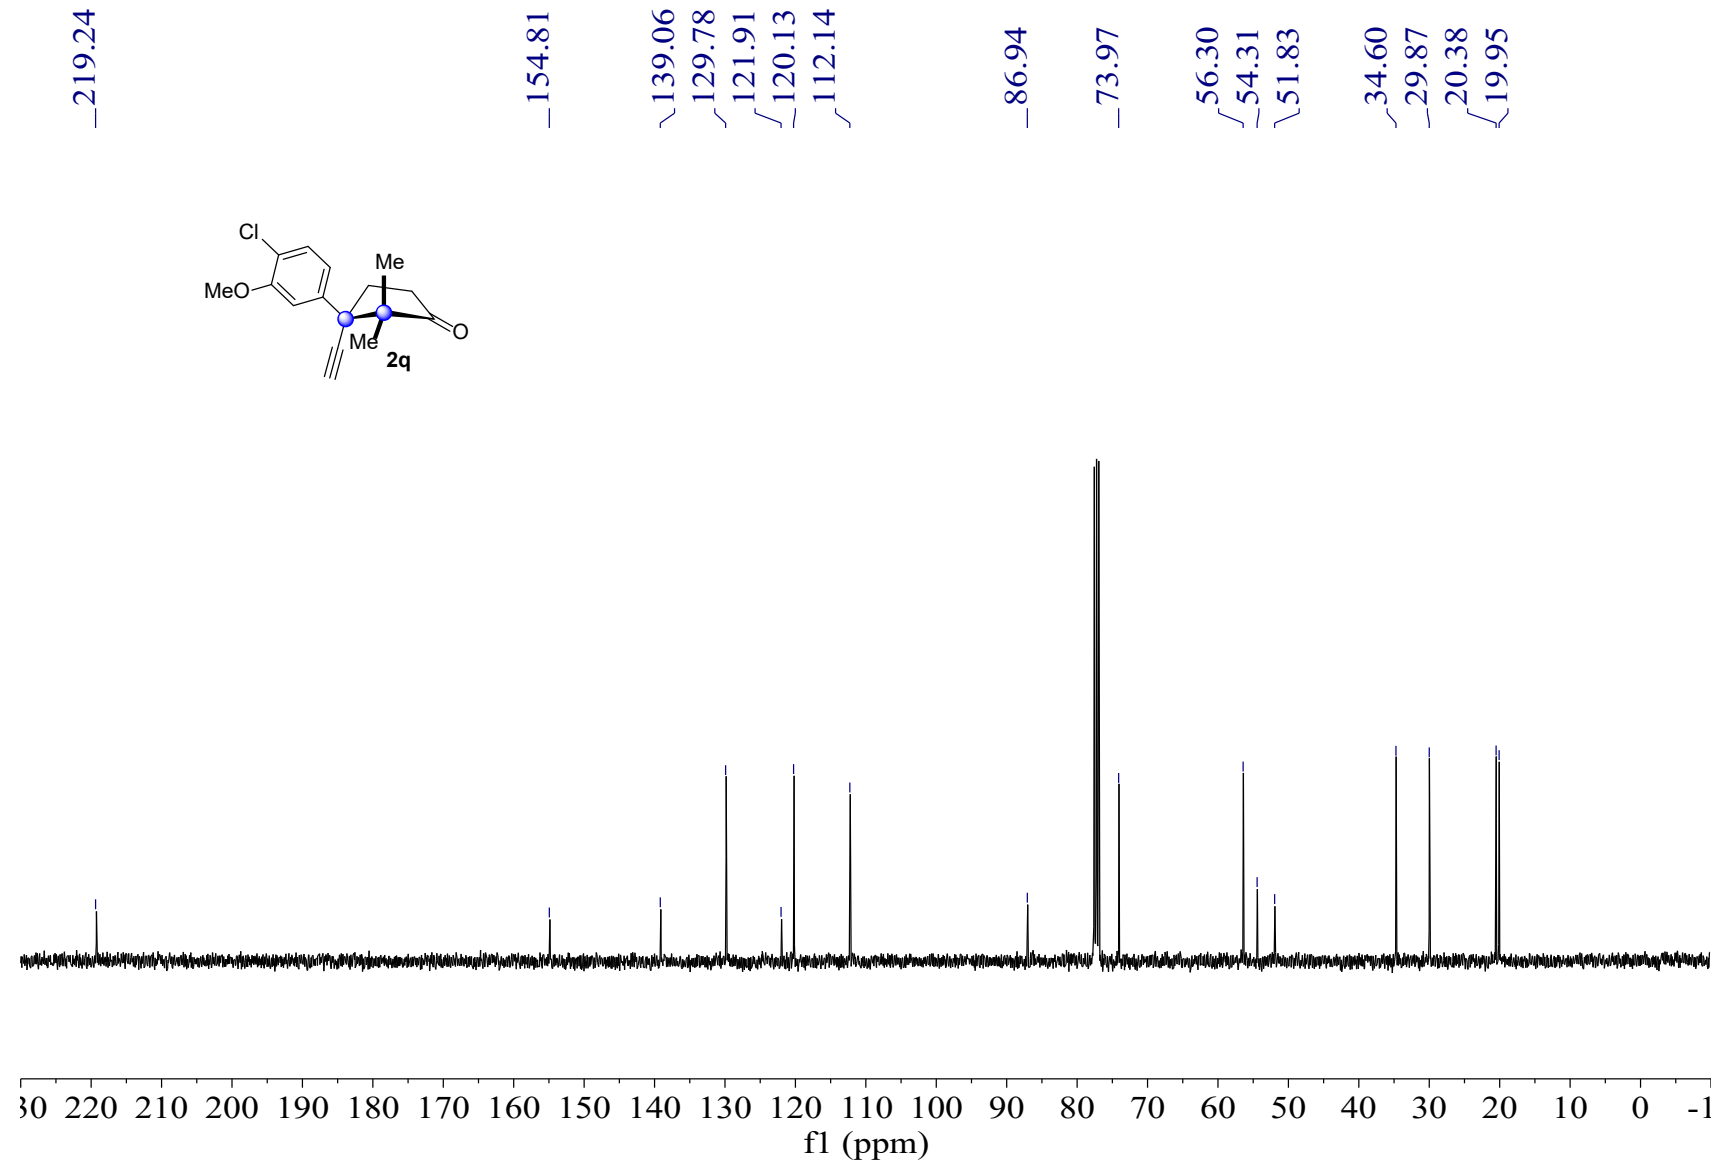

<sup>13</sup>C NMR spectrum of compound 2q

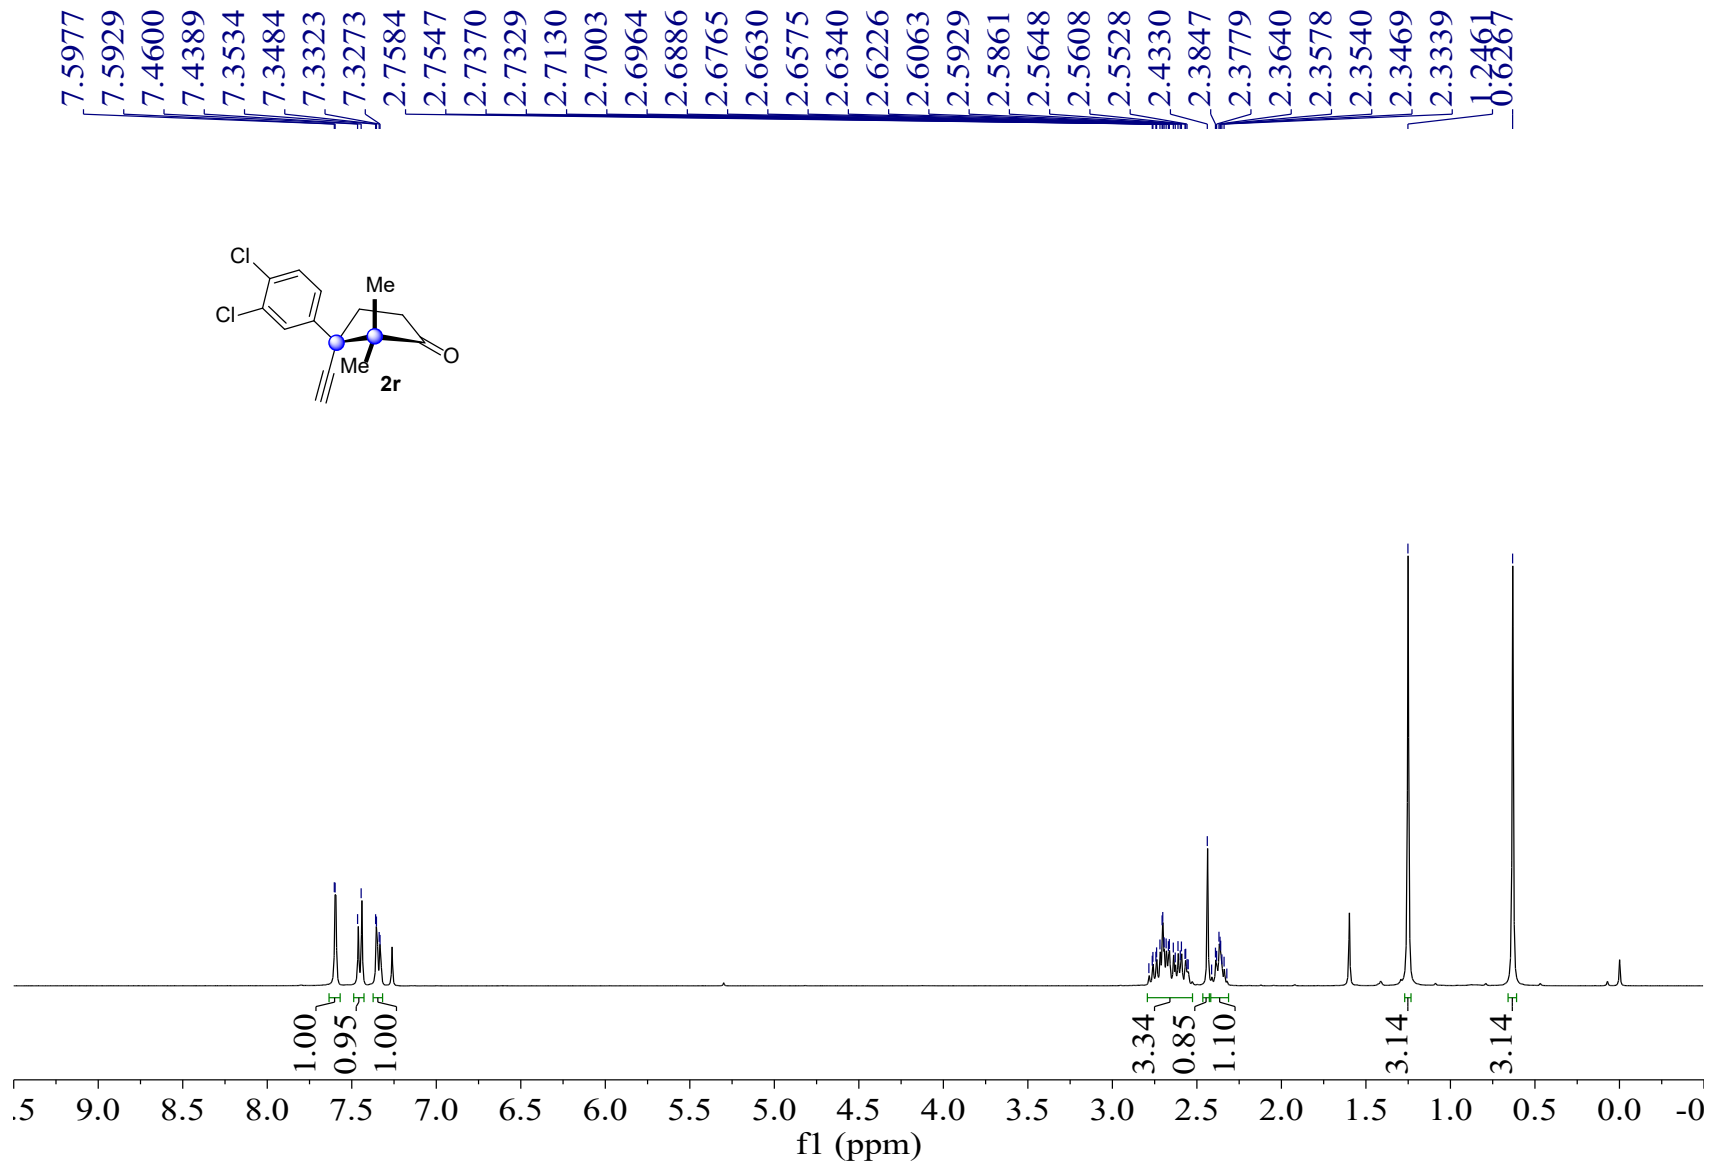

<sup>1</sup>H NMR spectrum of compound **2r**

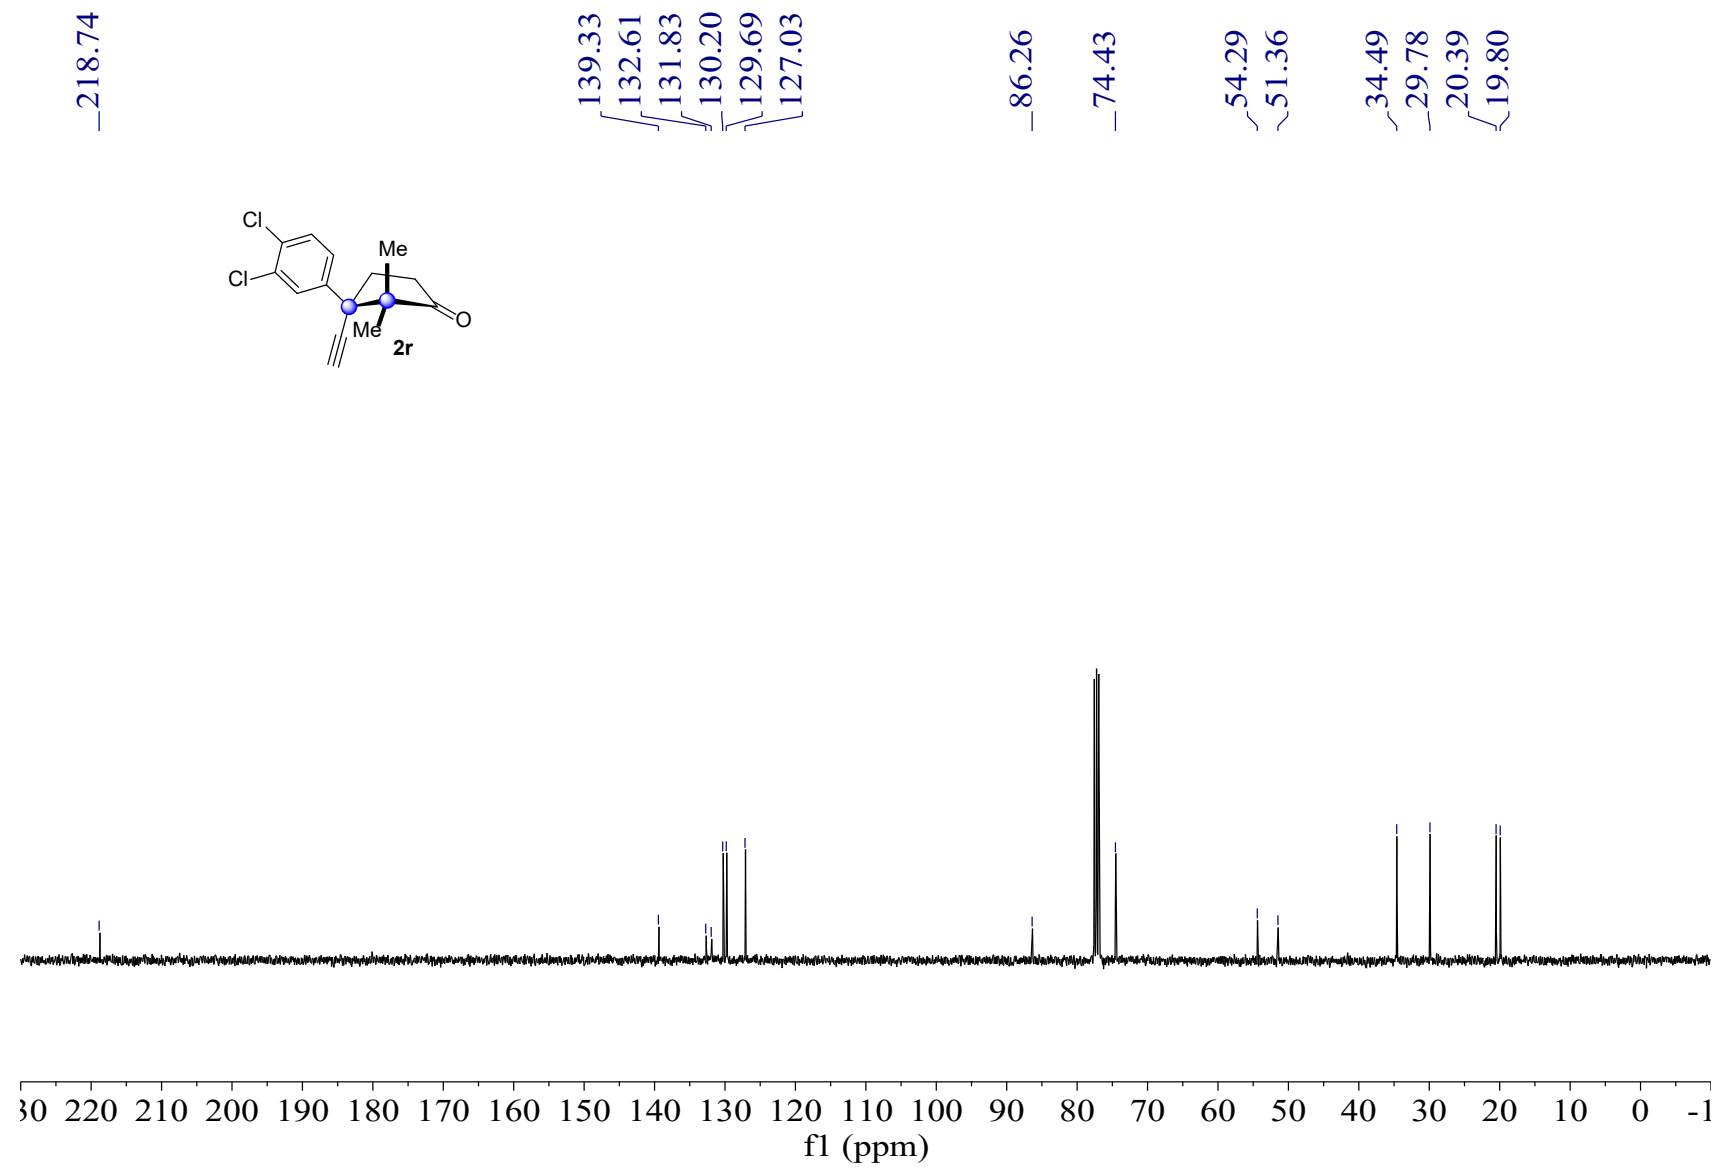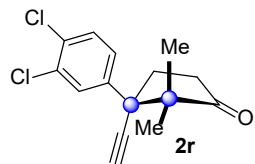

<sup>13</sup>C NMR spectrum of compound **2r**

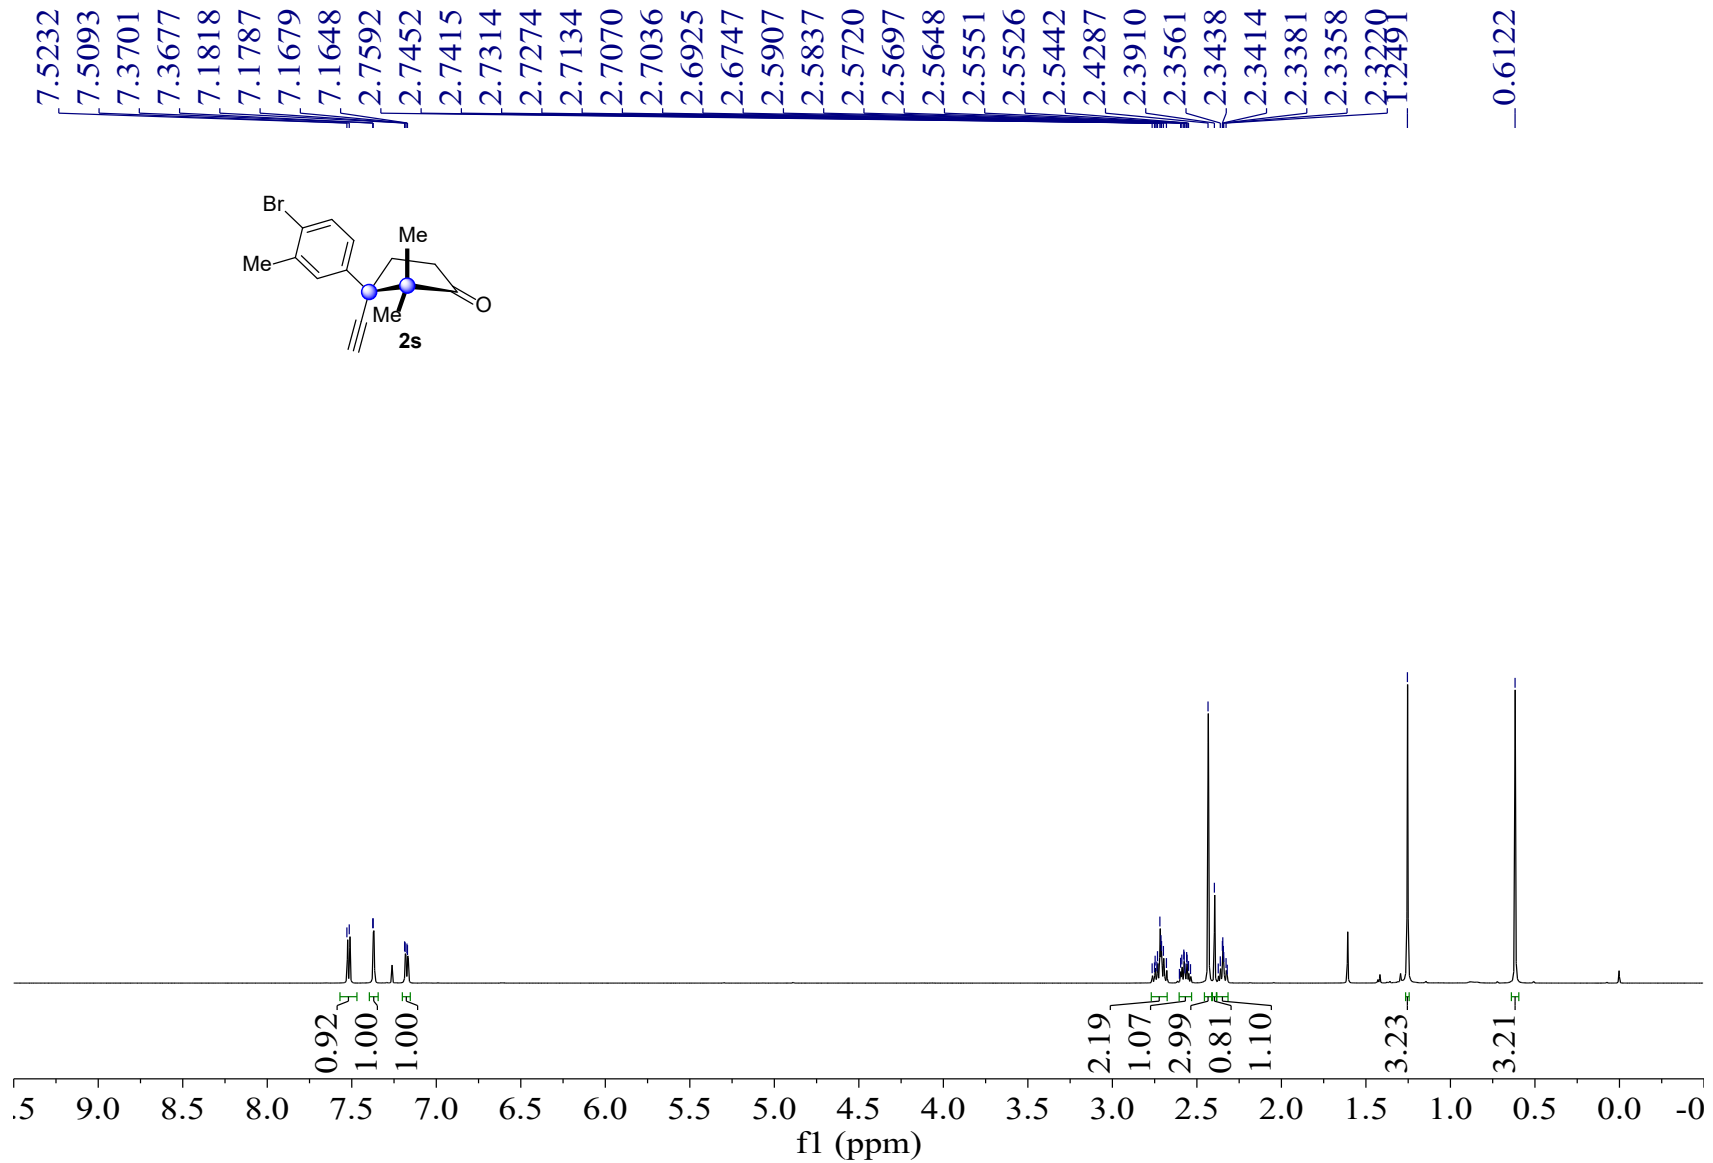

<sup>1</sup>H NMR spectrum of compound **2s**

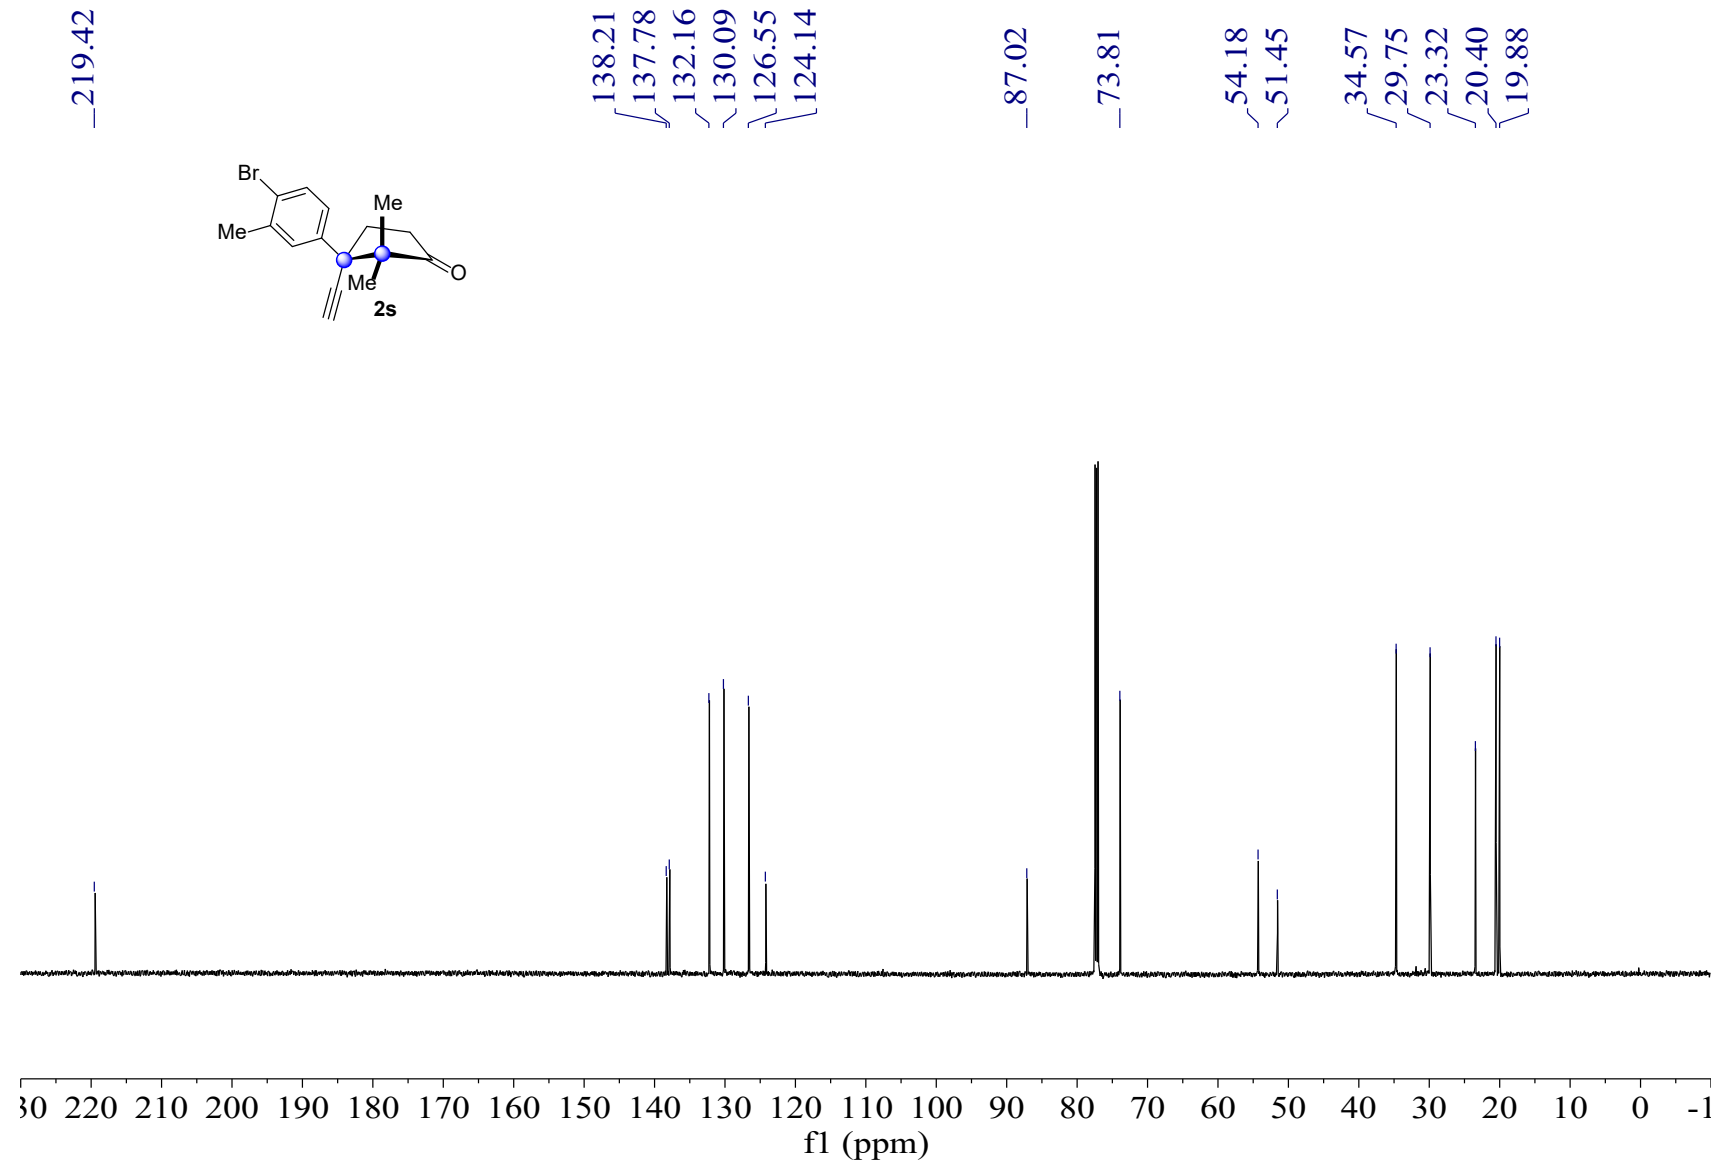

<sup>13</sup>C NMR spectrum of compound **2s**

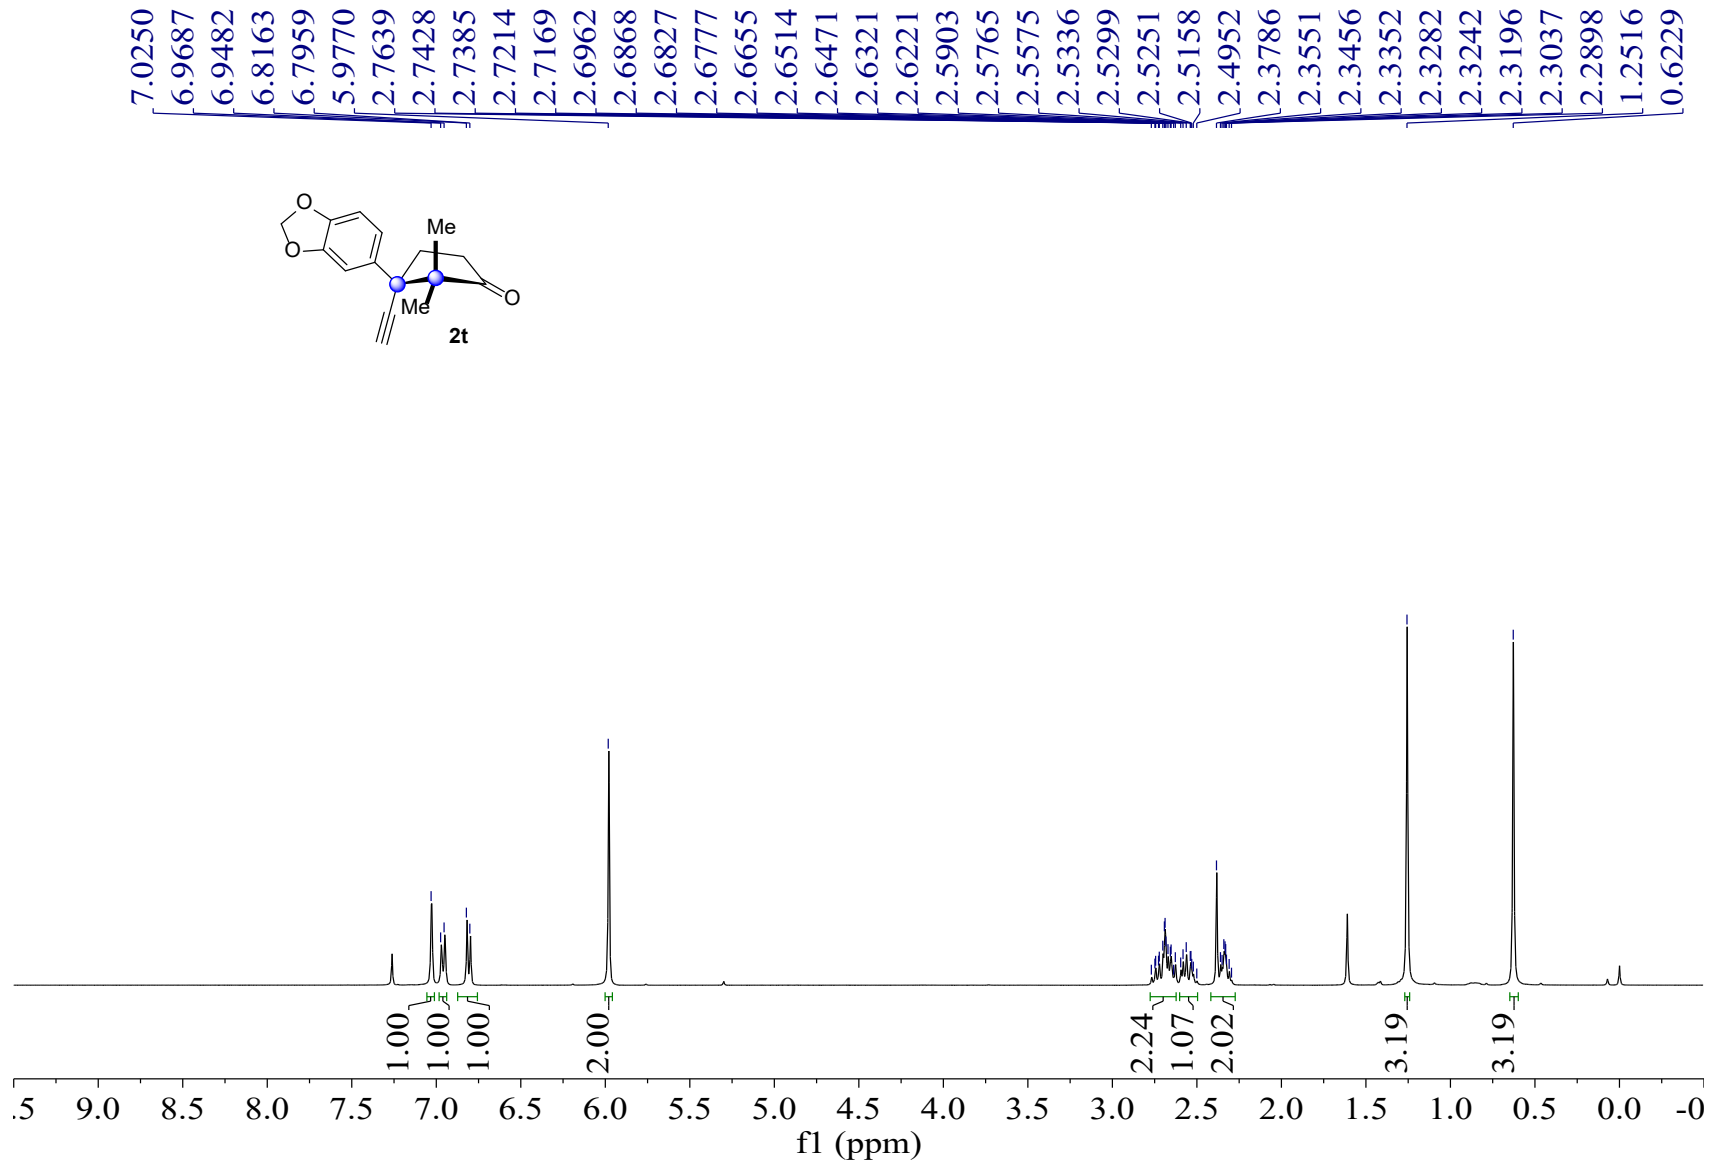

<sup>1</sup>H NMR spectrum of compound **2t**



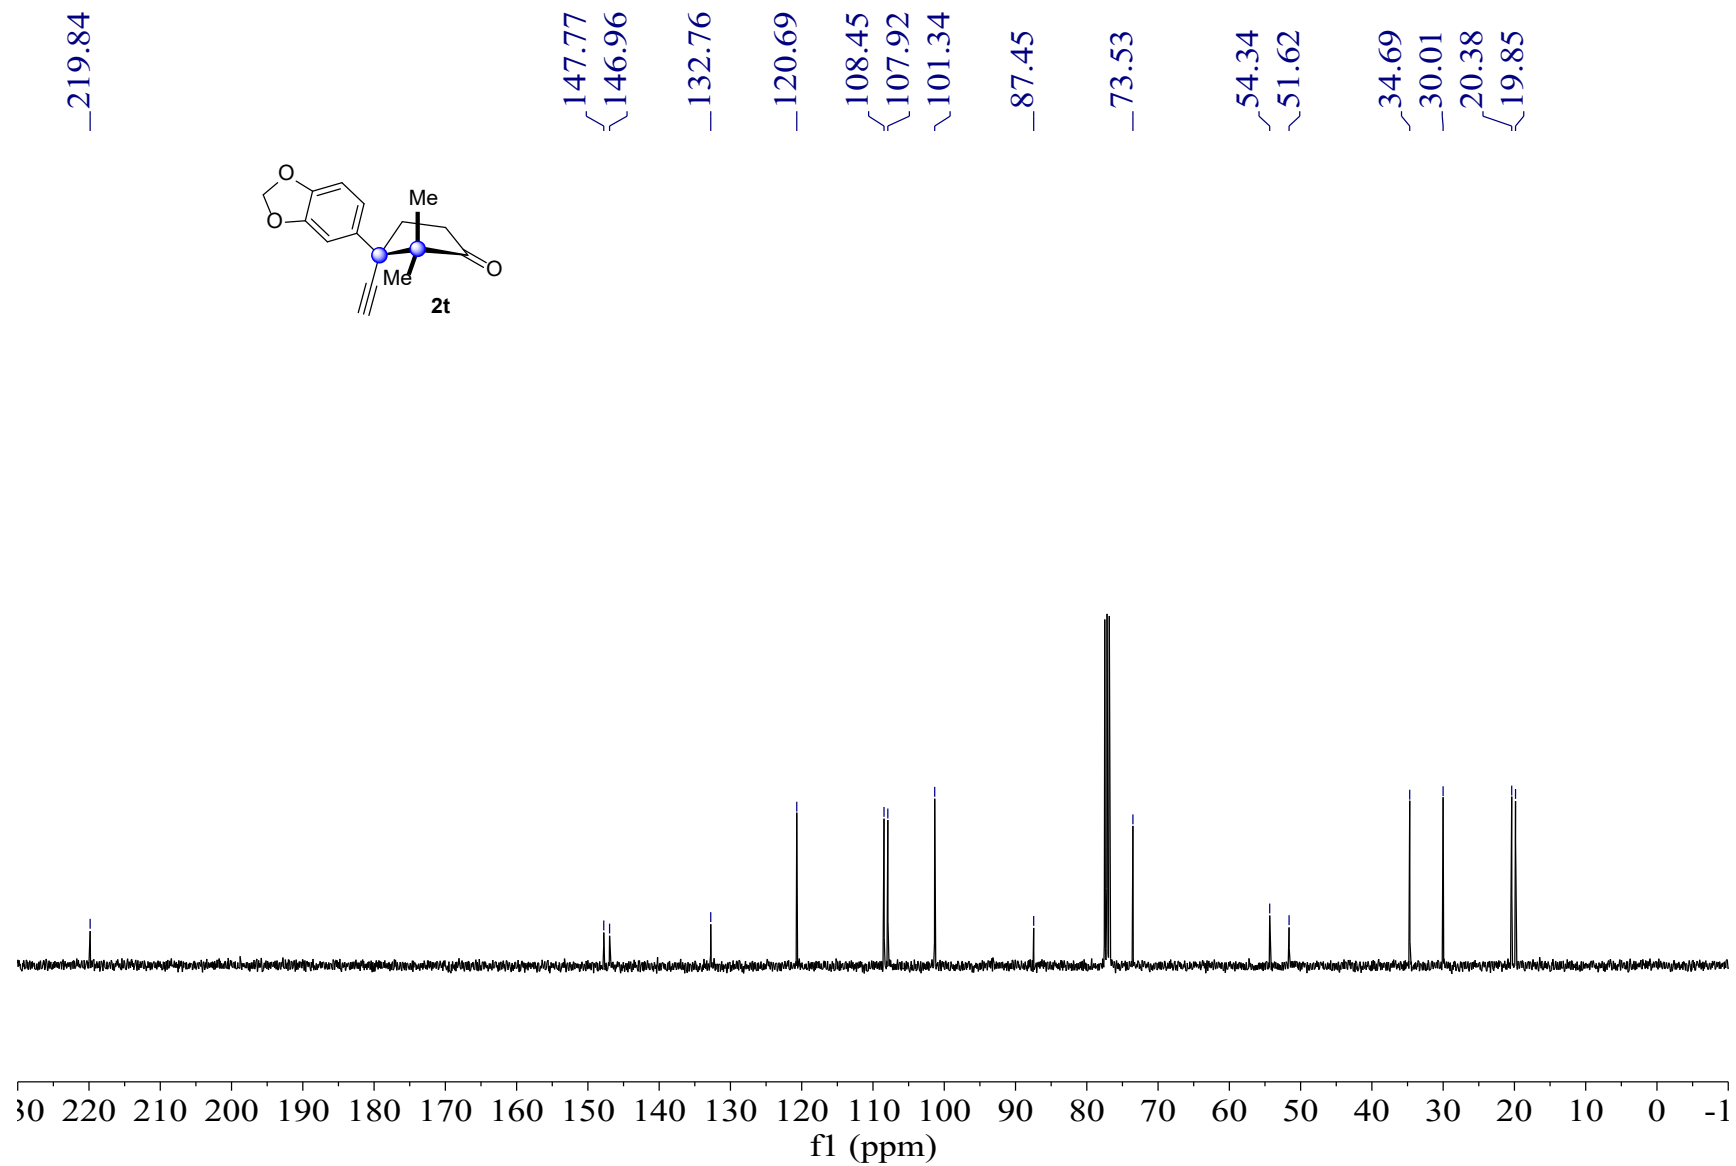

<sup>13</sup>C NMR spectrum of compound **2t**

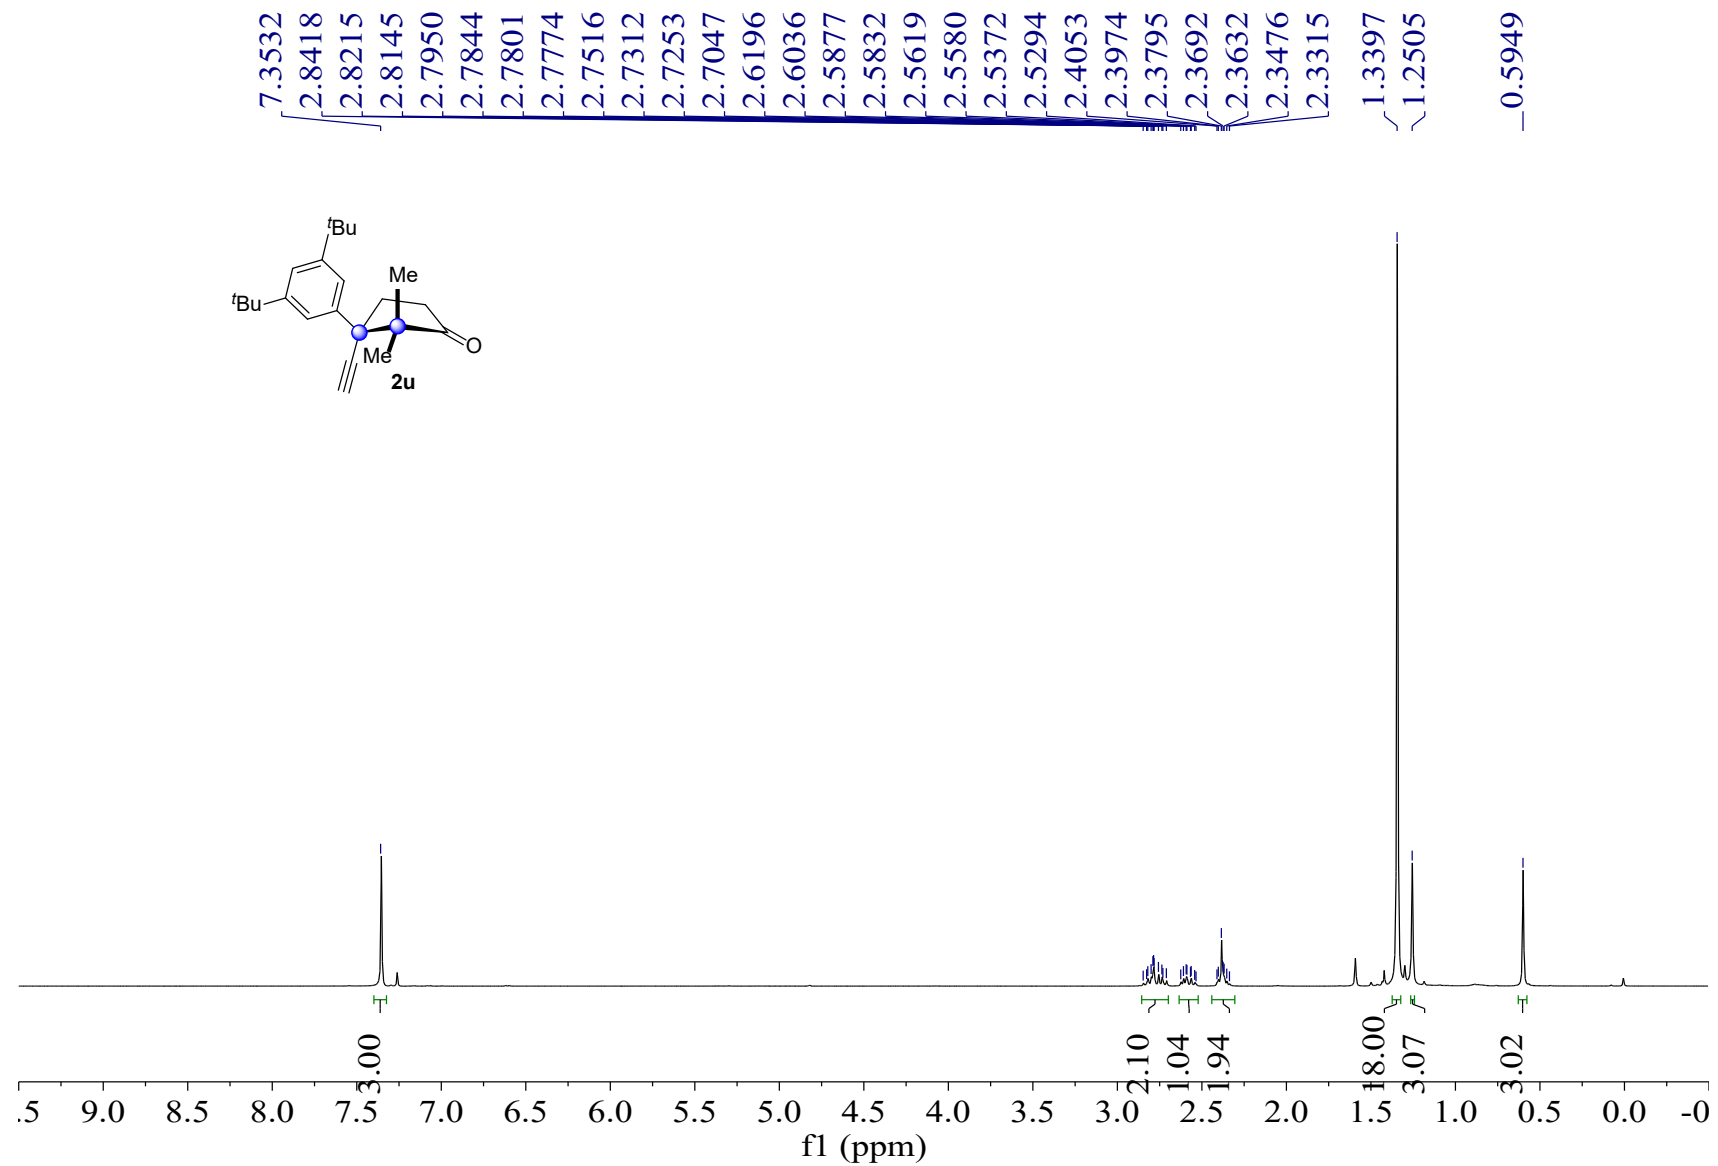

<sup>1</sup>H NMR spectrum of compound **2u**

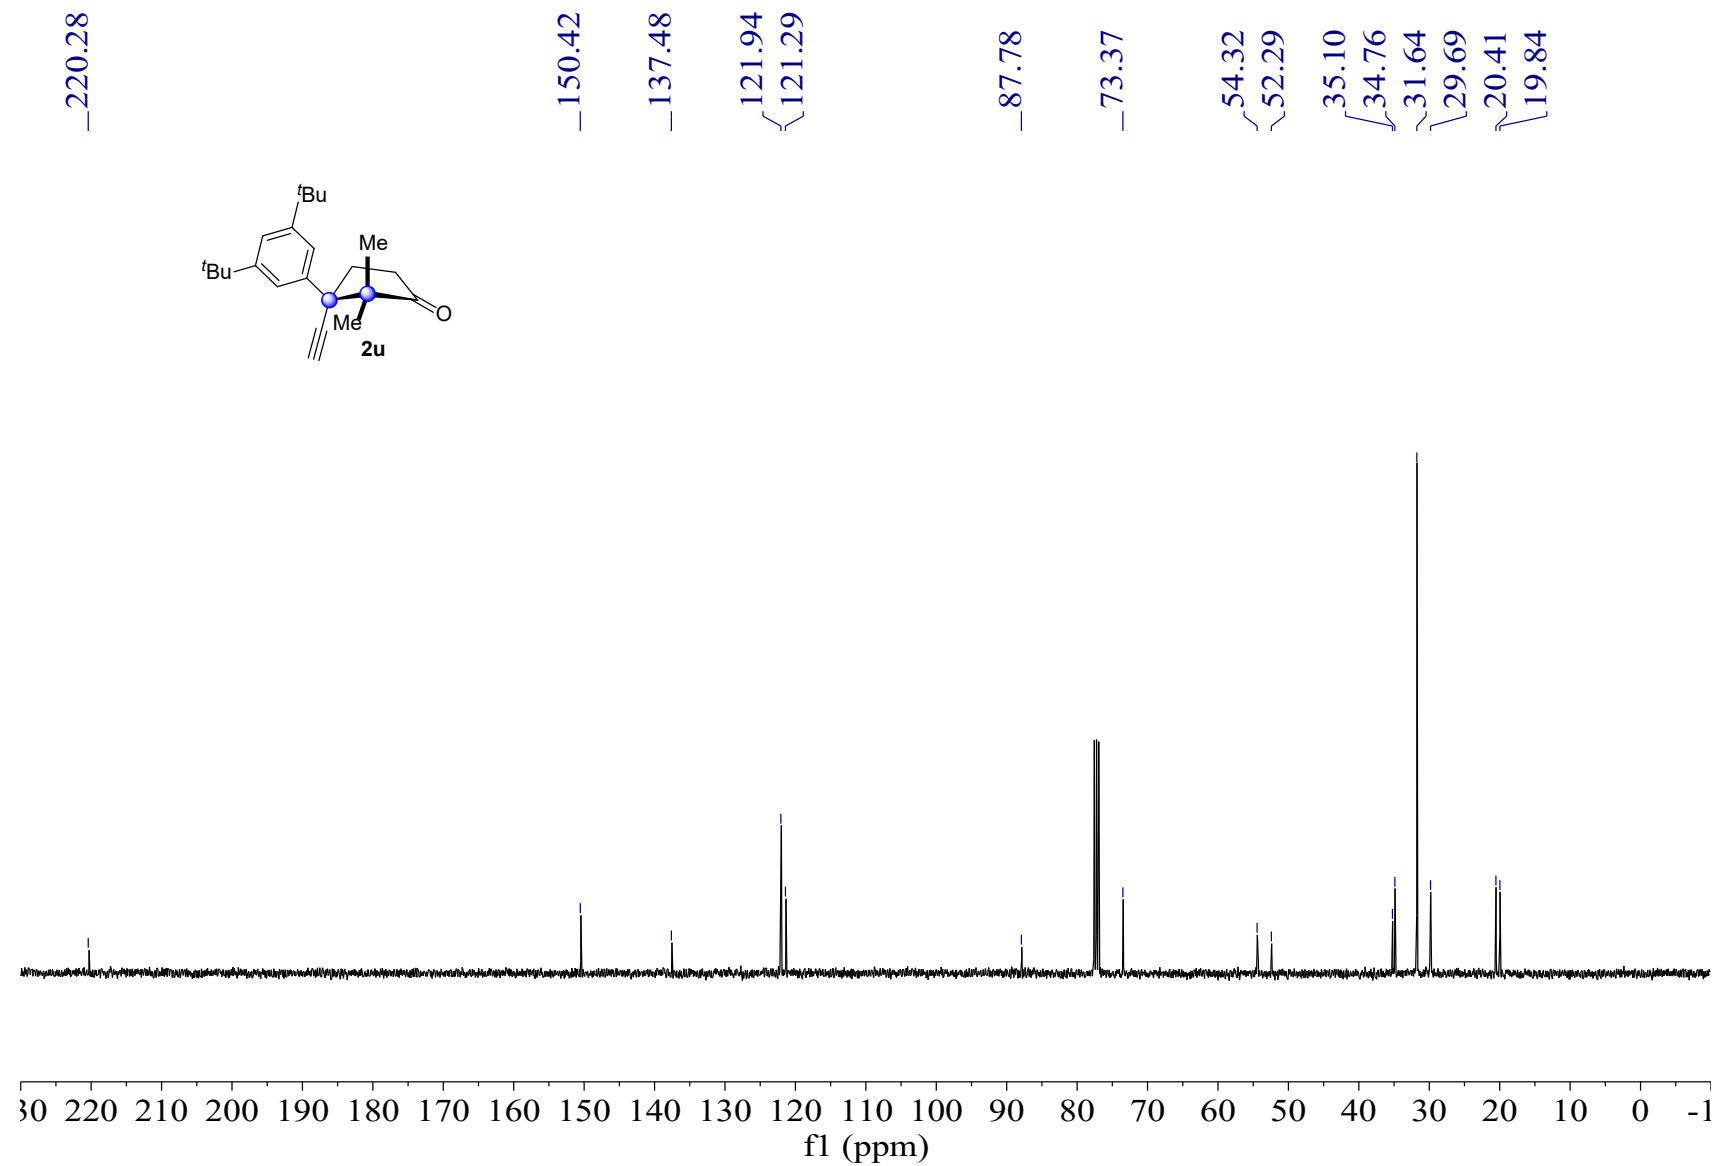

$^{13}\text{C}$  NMR spectrum of compound **2u**

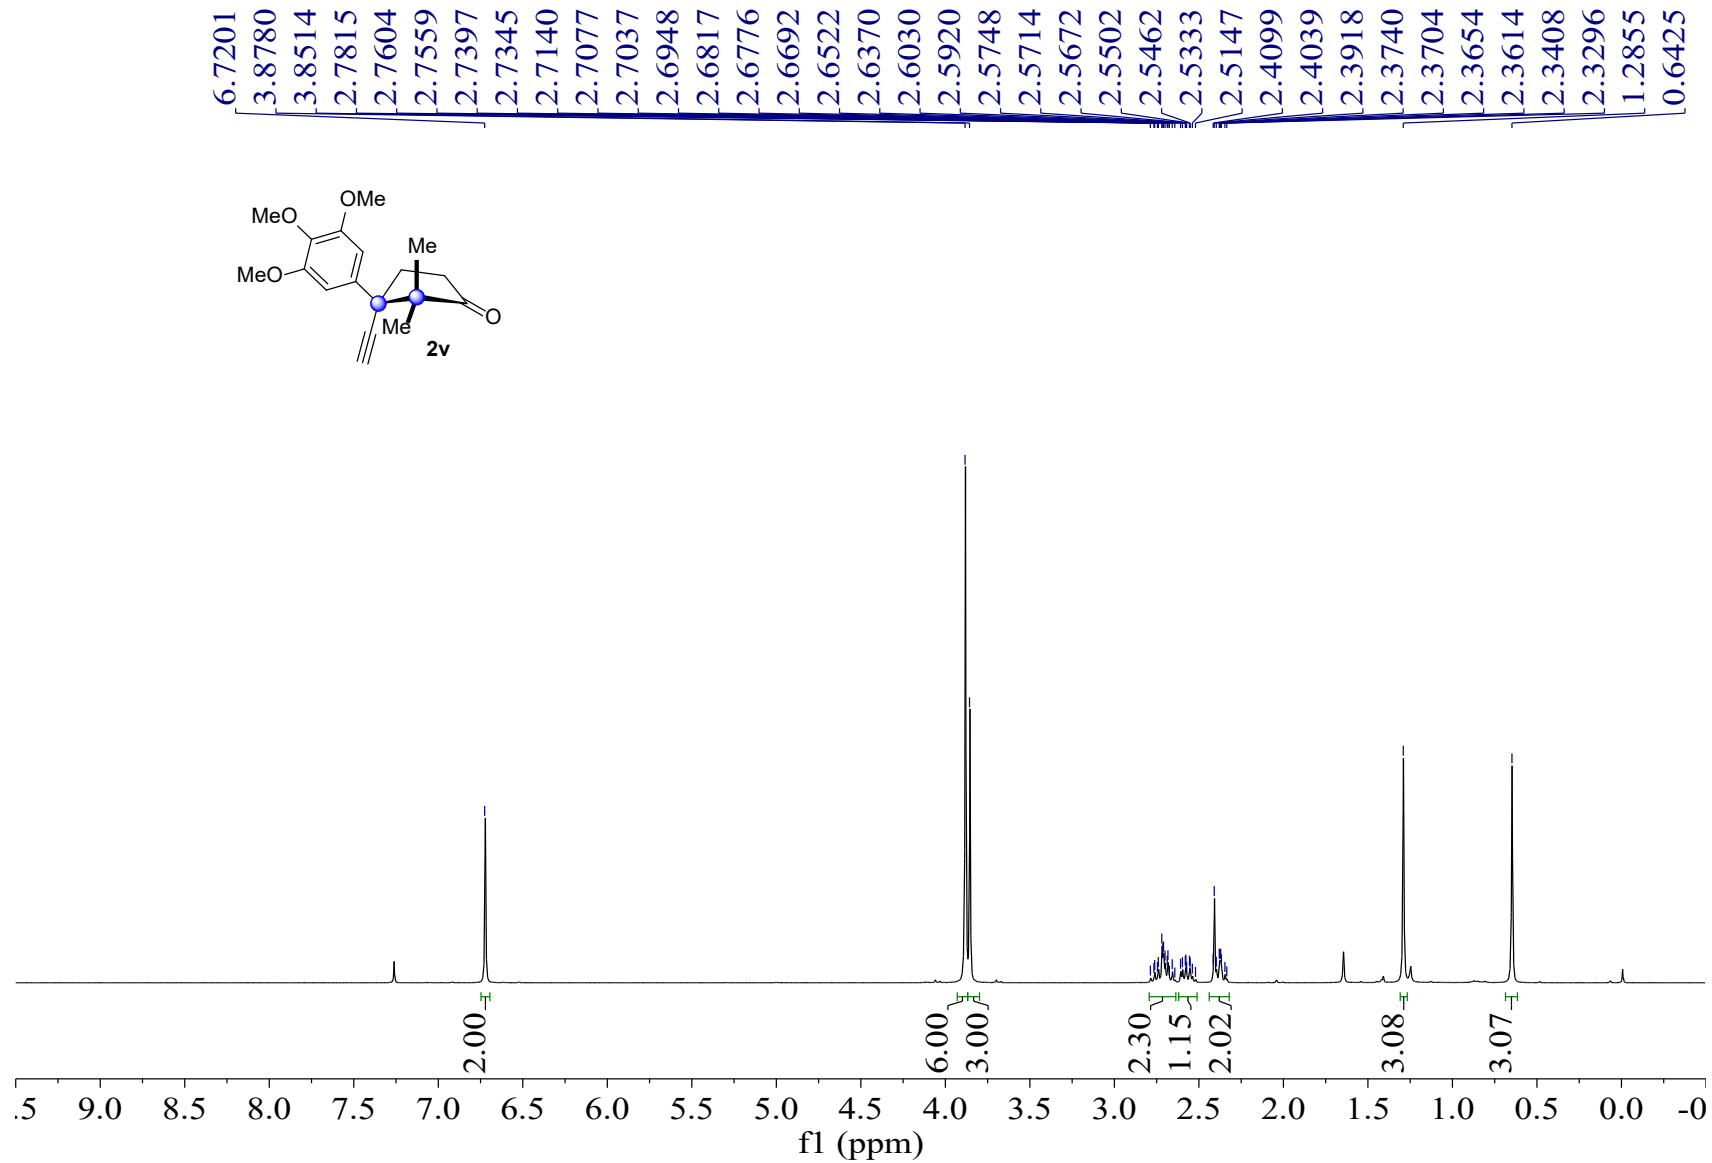

<sup>1</sup>H NMR spectrum of compound **2v**

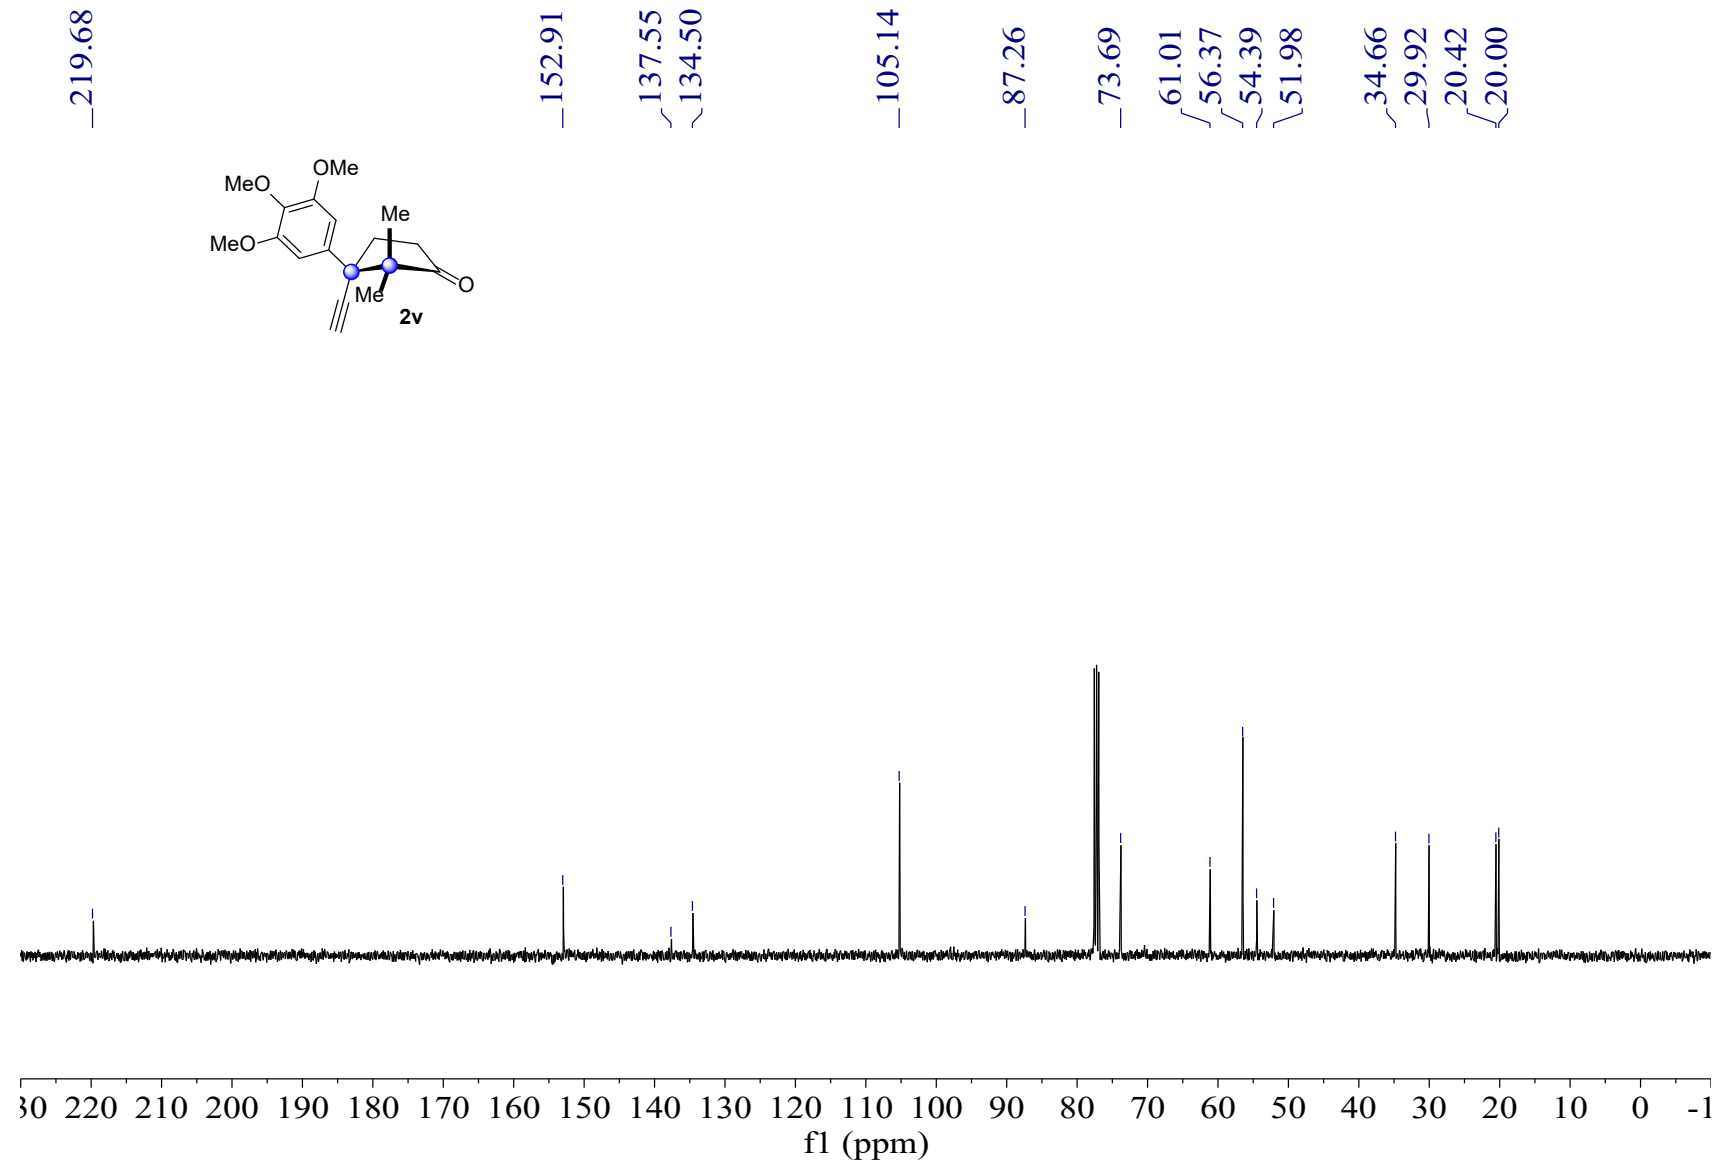

<sup>13</sup>C NMR spectrum of compound **2v**

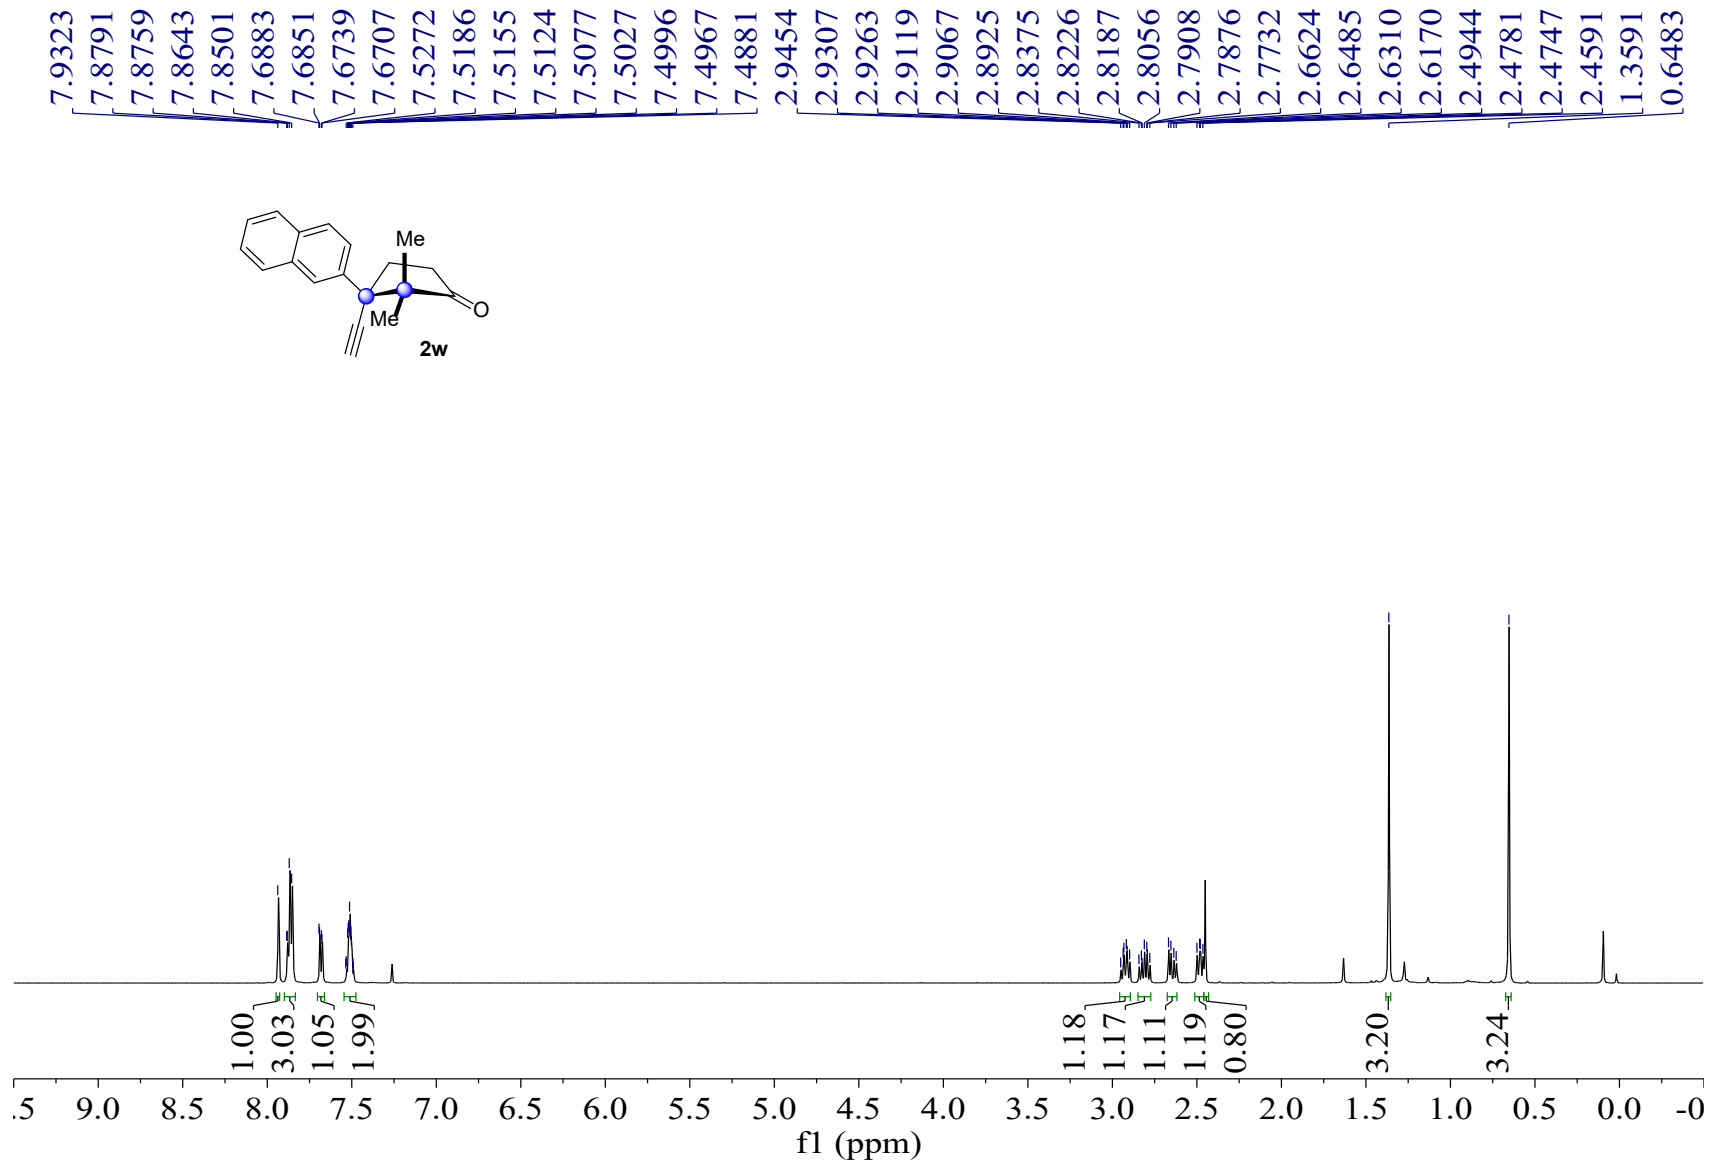

<sup>1</sup>H NMR spectrum of compound **2w**

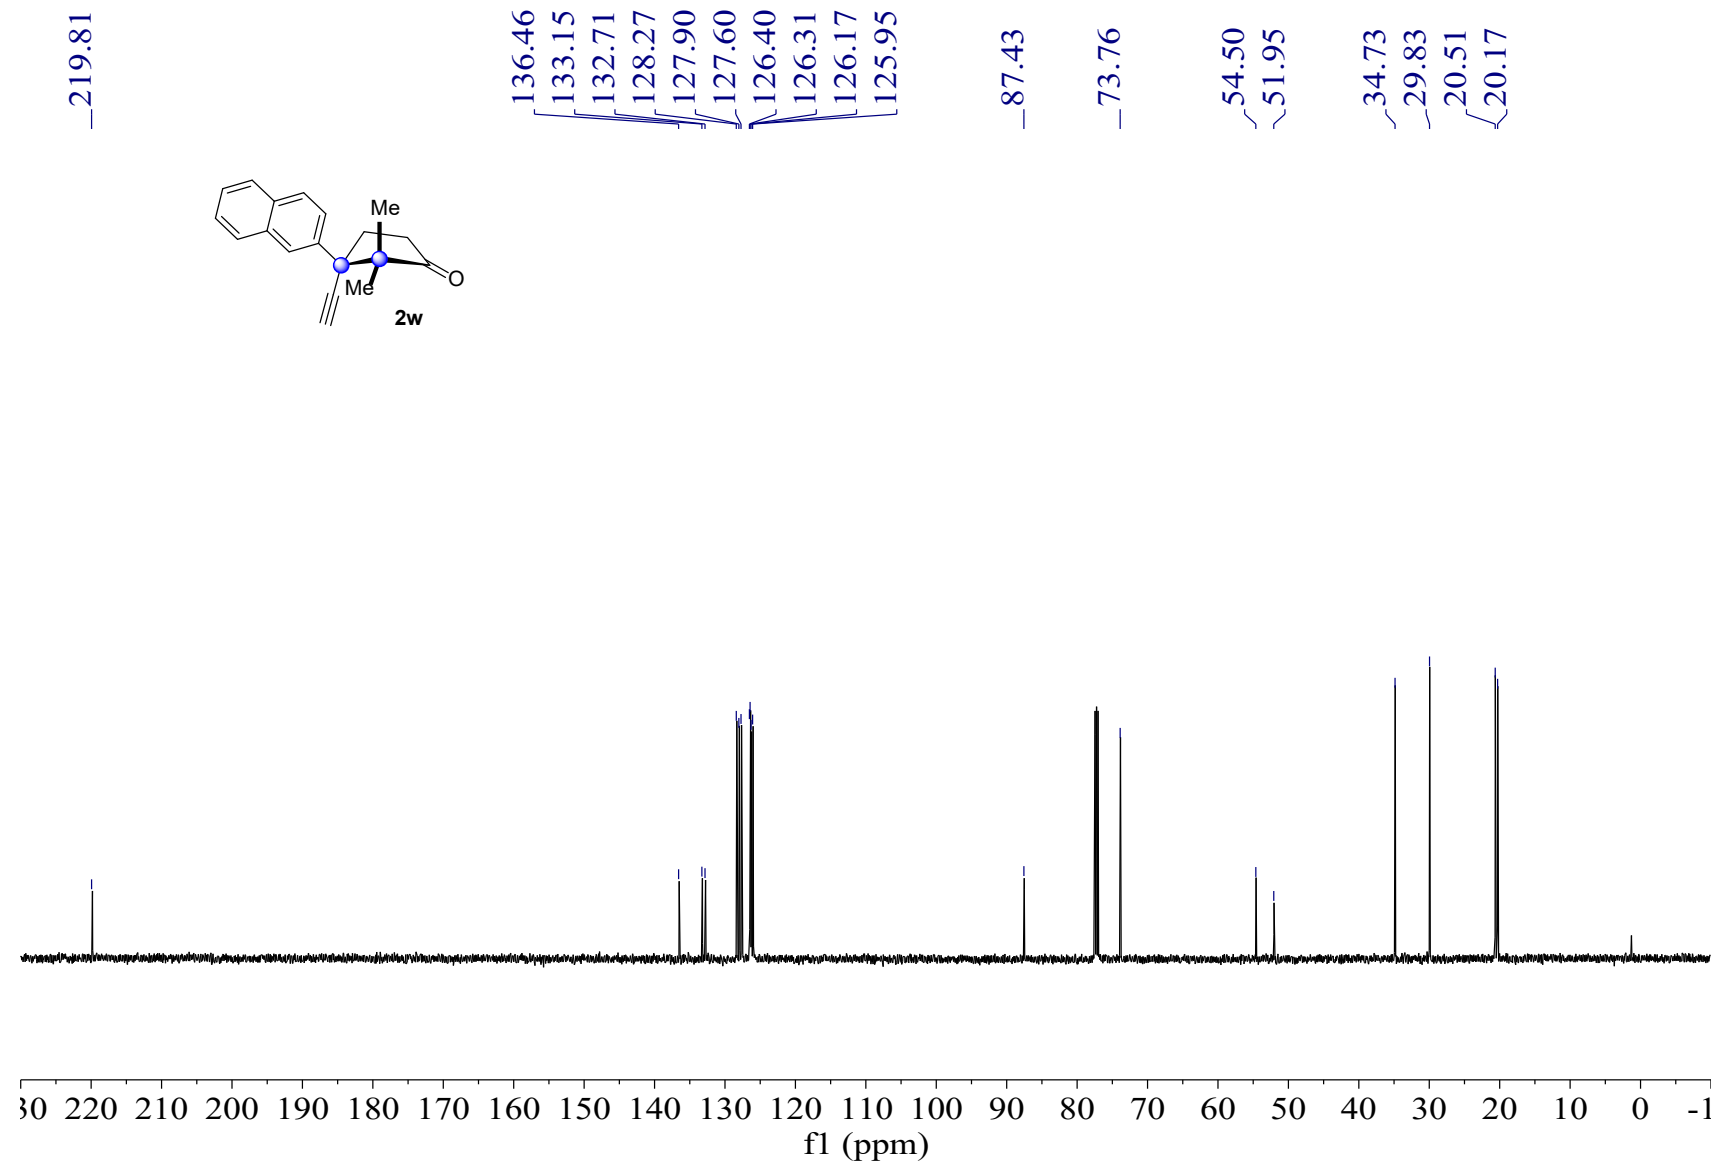

<sup>13</sup>C NMR spectrum of compound **2w**

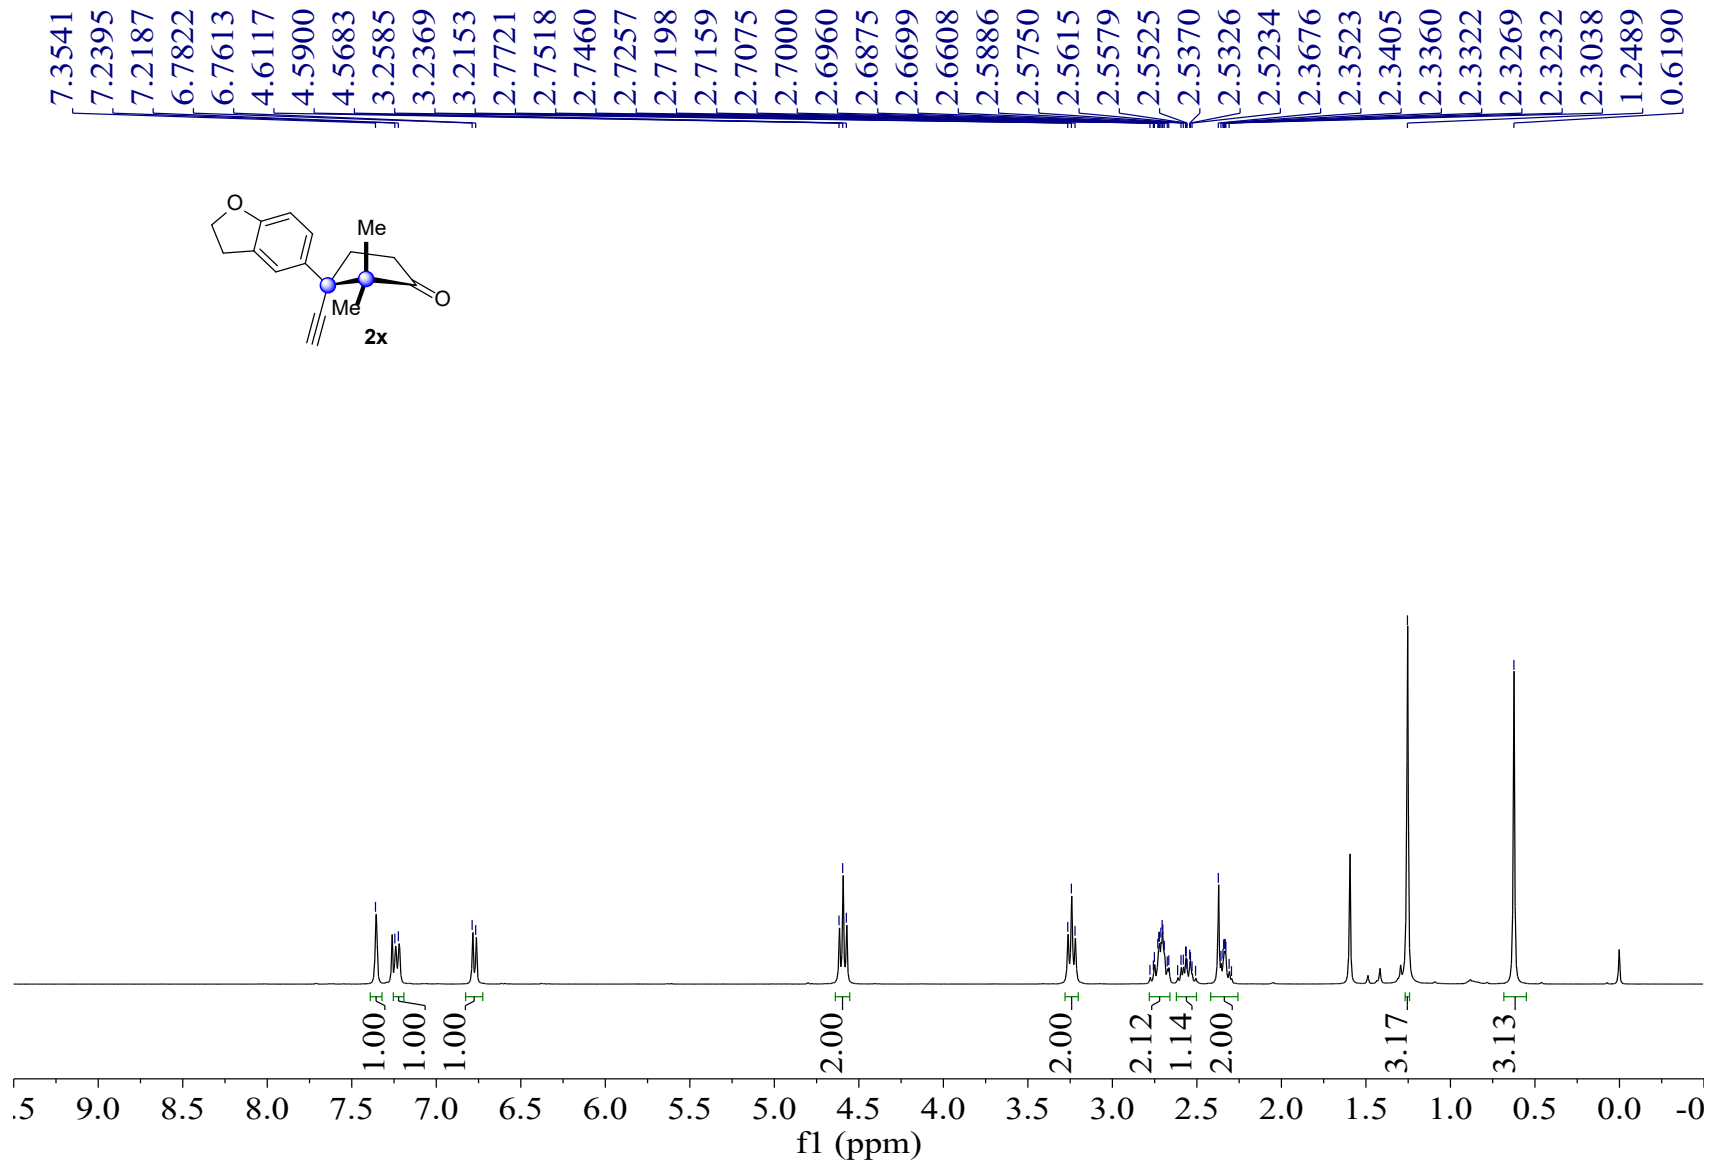

$^1\text{H}$  NMR spectrum of compound **2x**



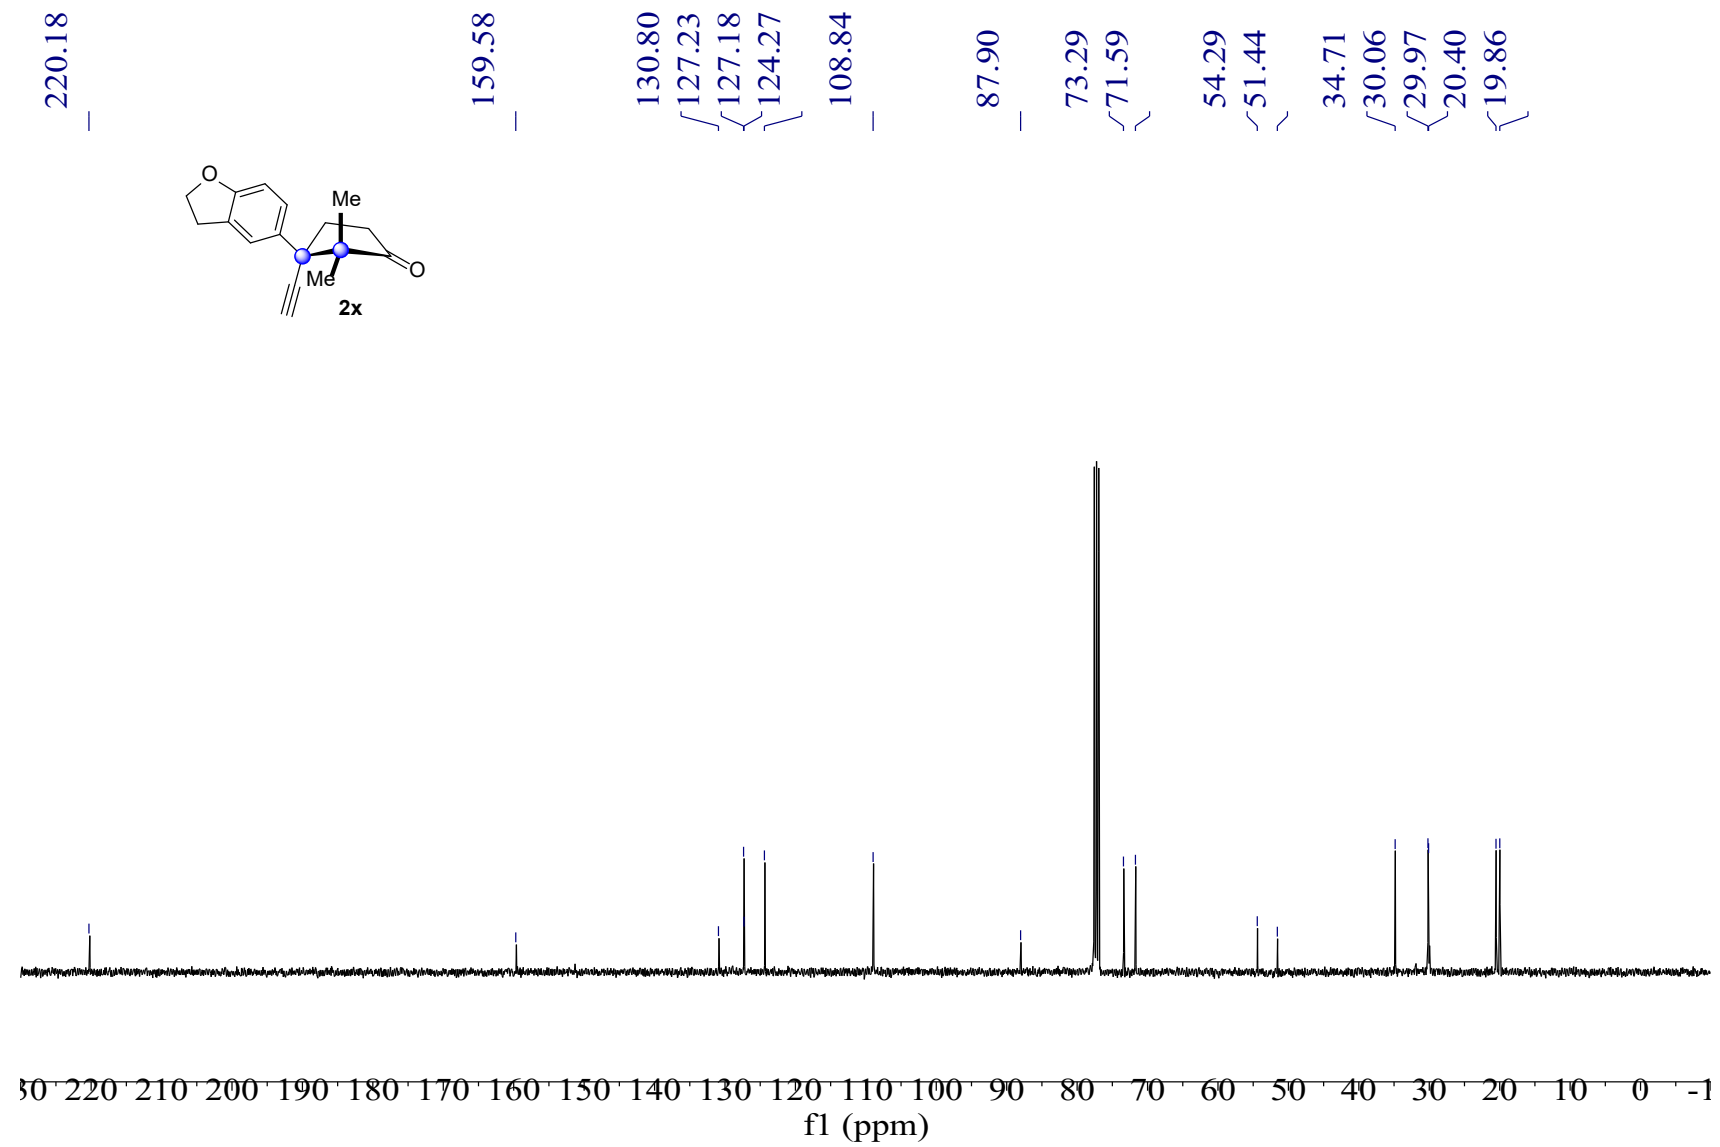

<sup>13</sup>C NMR spectrum of compound **2x**

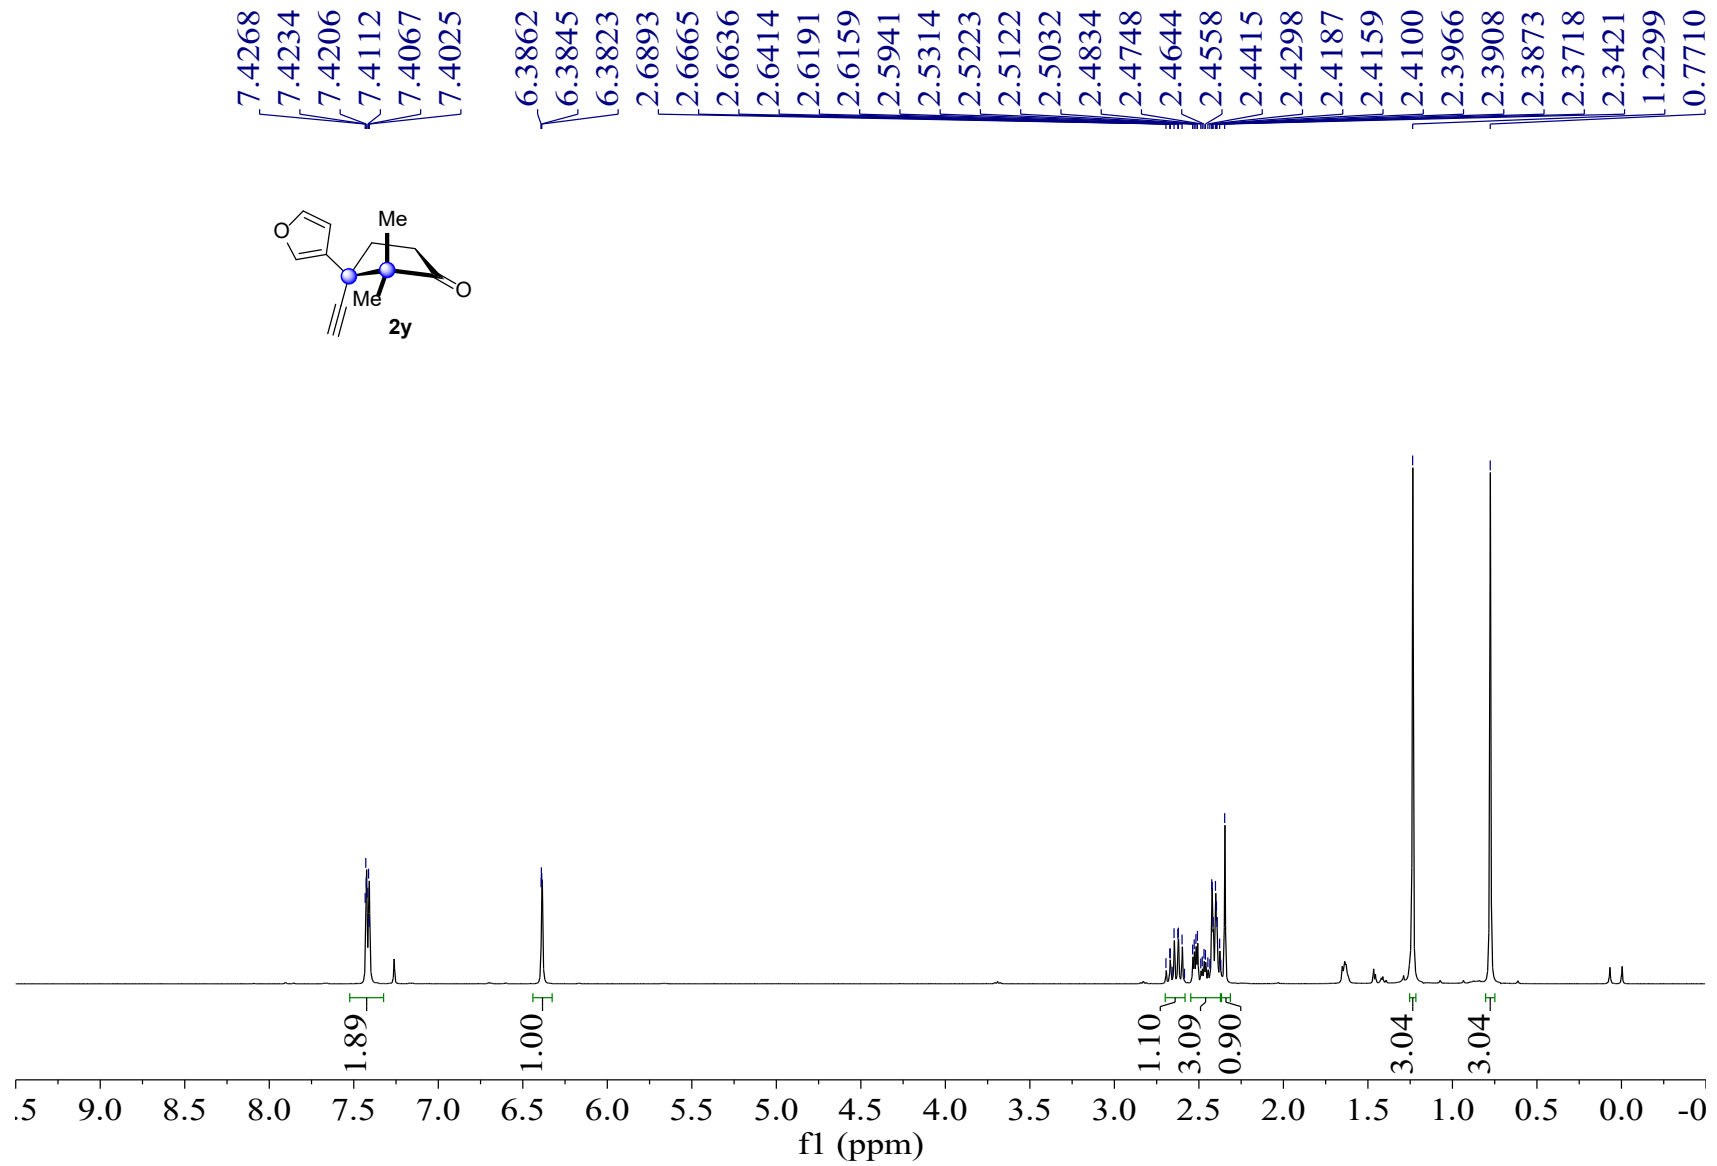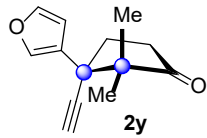

<sup>1</sup>H NMR spectrum of compound 2y

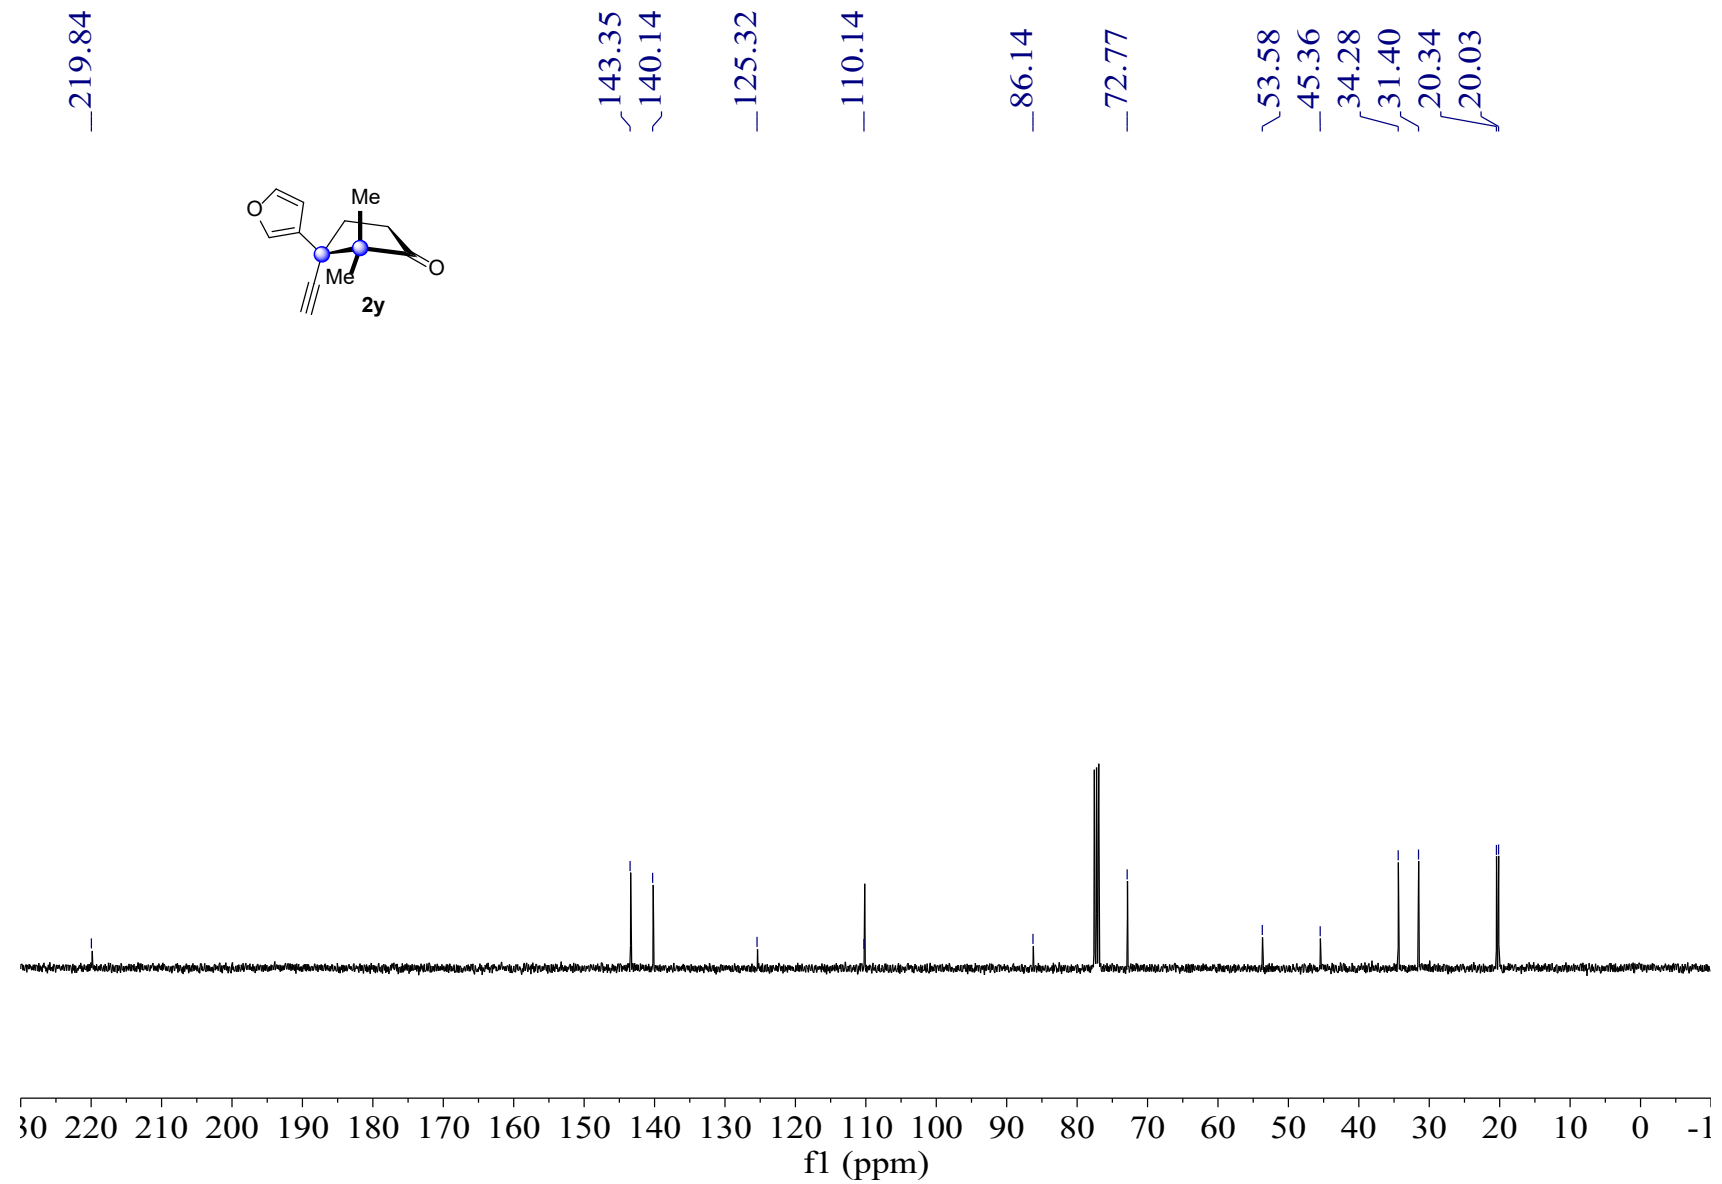

<sup>13</sup>C NMR spectrum of compound **2y**

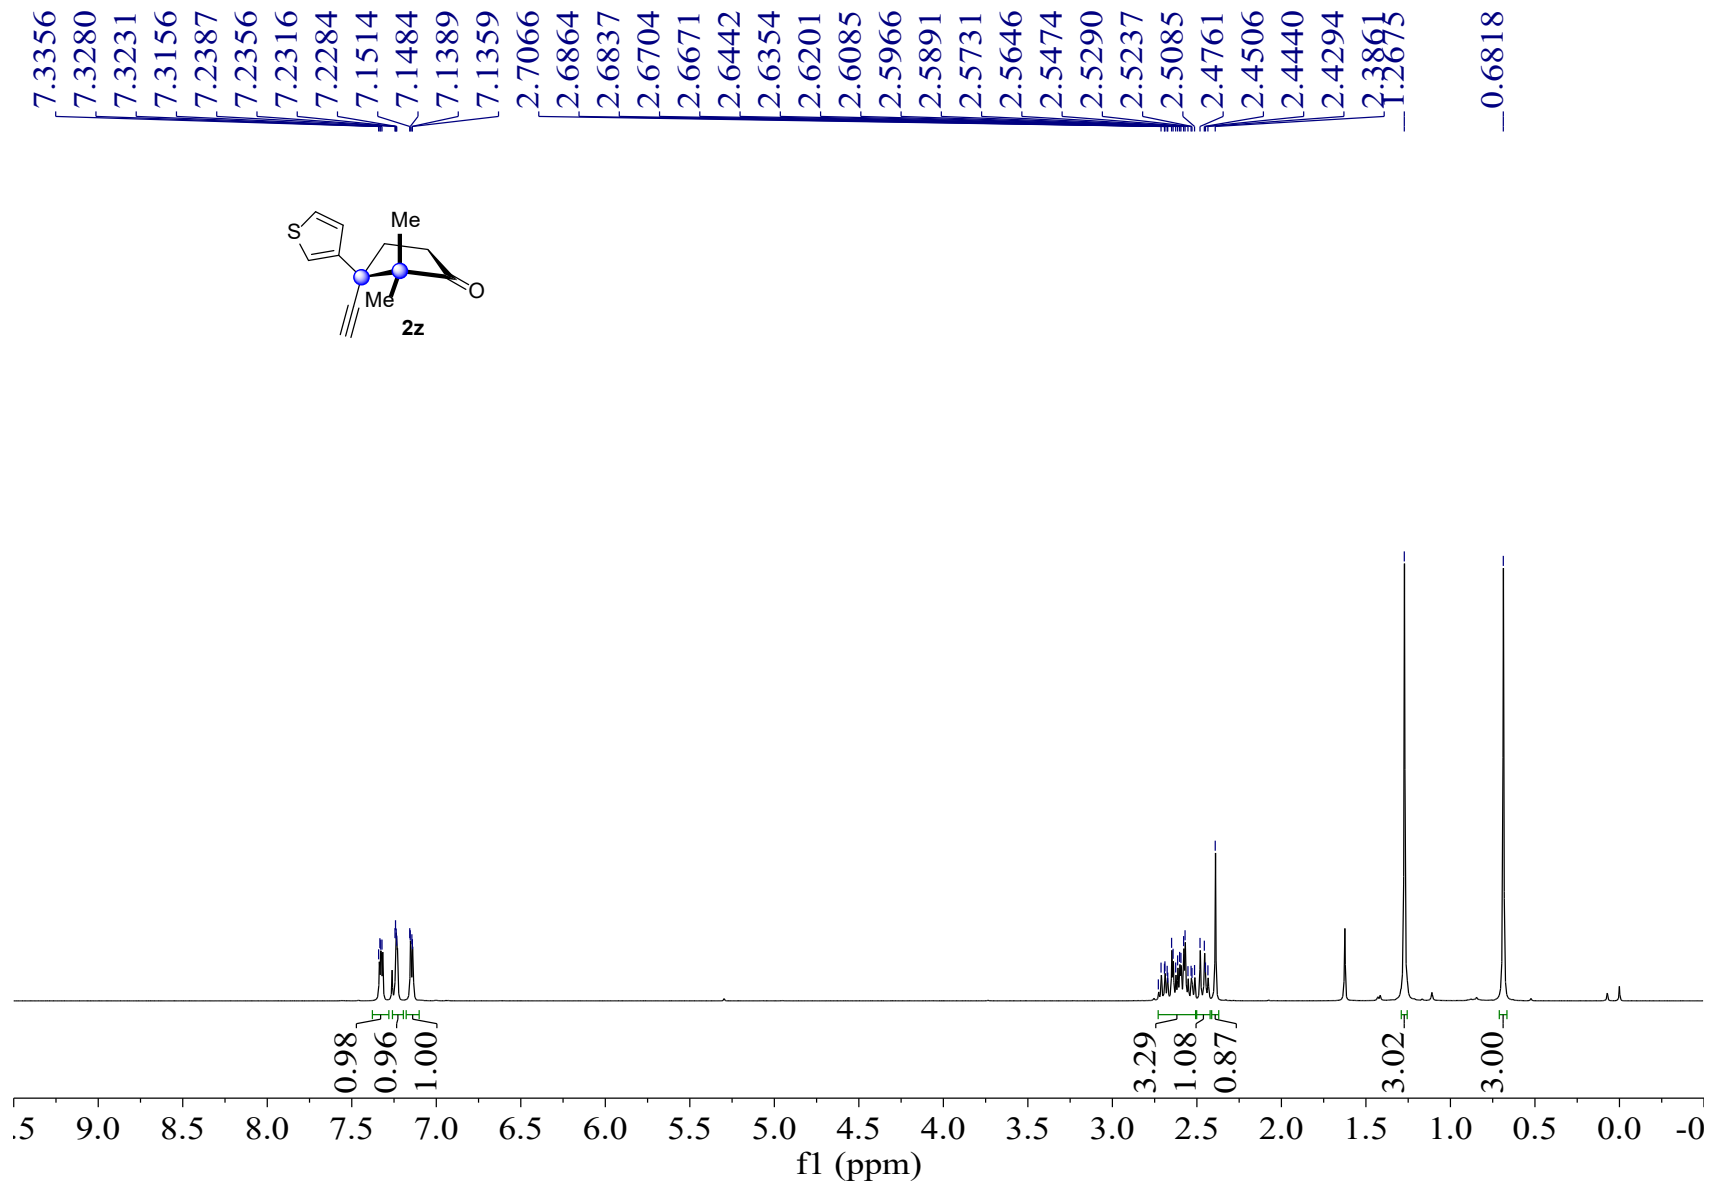

<sup>1</sup>H NMR spectrum of compound **2z**

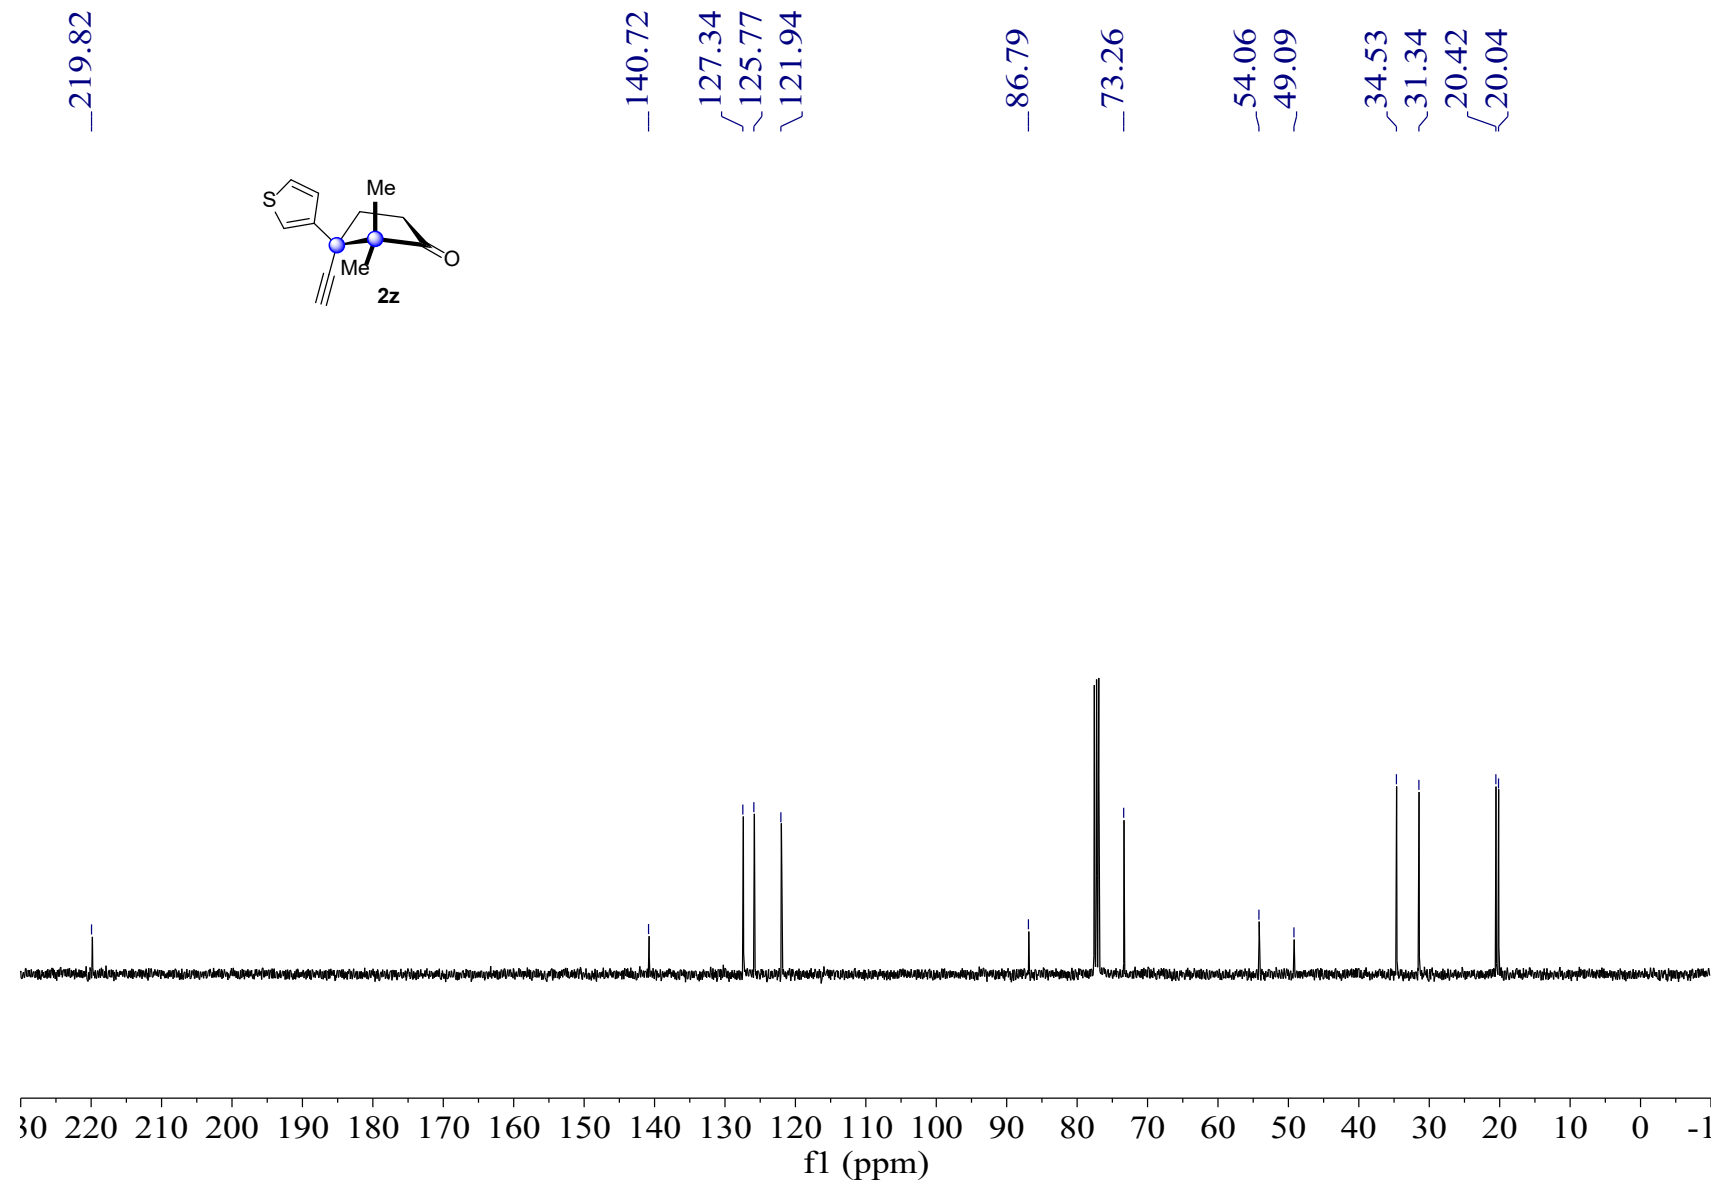

<sup>13</sup>C NMR spectrum of compound **2z**

7.2568  
7.2482  
7.0589  
7.0546  
7.0170  
7.0102  
7.0030

2.7091  
2.6969  
2.6818  
2.6690  
2.6515  
2.6368  
2.6243  
2.6169  
2.6083  
2.6035  
2.5912  
2.5833  
2.5703  
2.5565  
2.5536  
2.5428  
2.5371  
2.5210  
2.4262  
-1.3075  
-0.7354

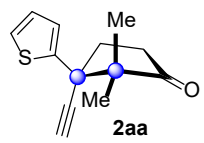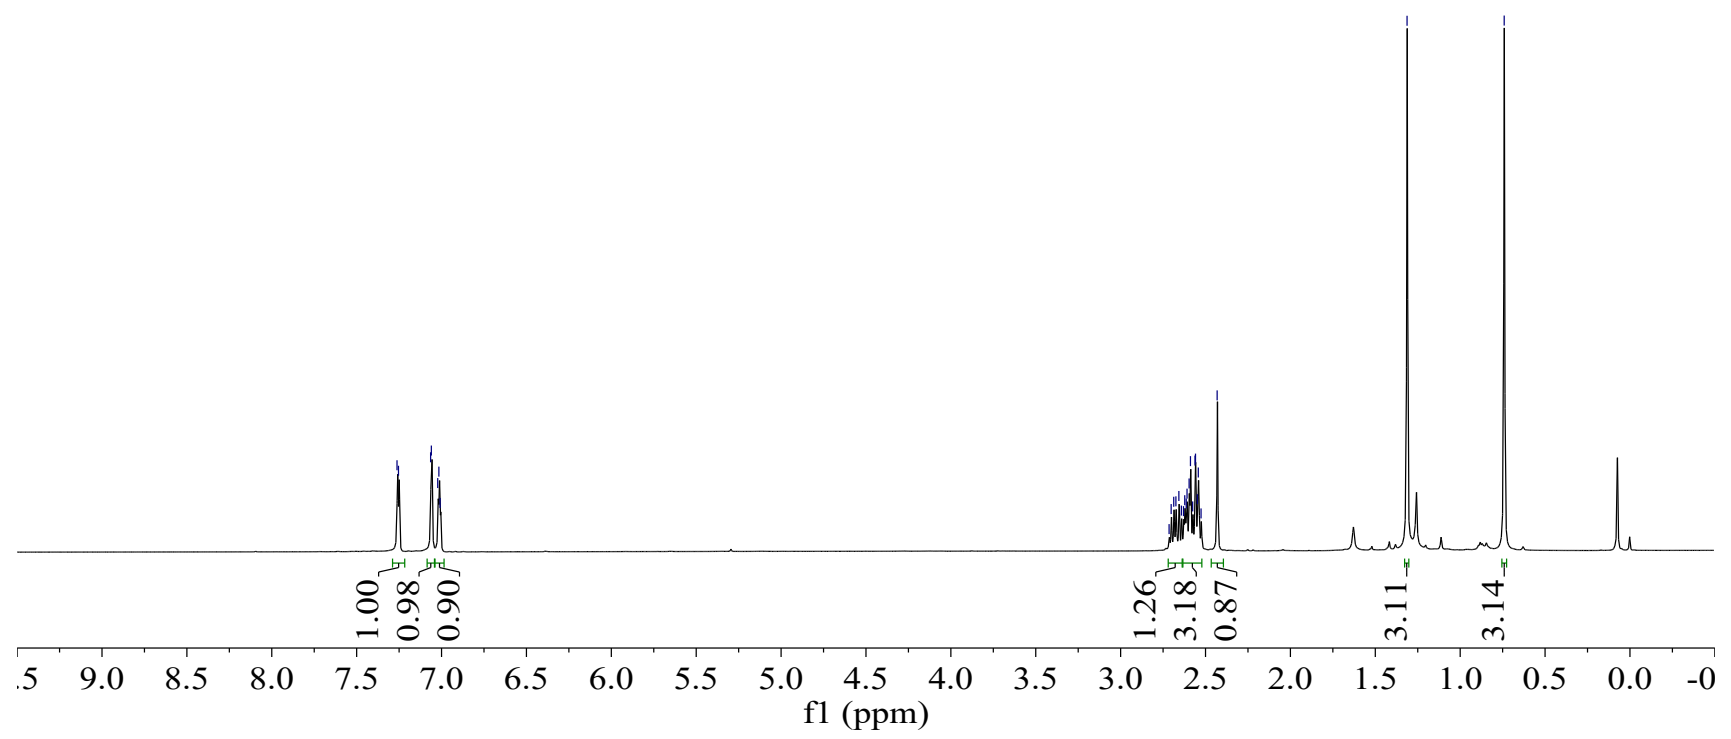

<sup>1</sup>H NMR spectrum of compound **2aa**

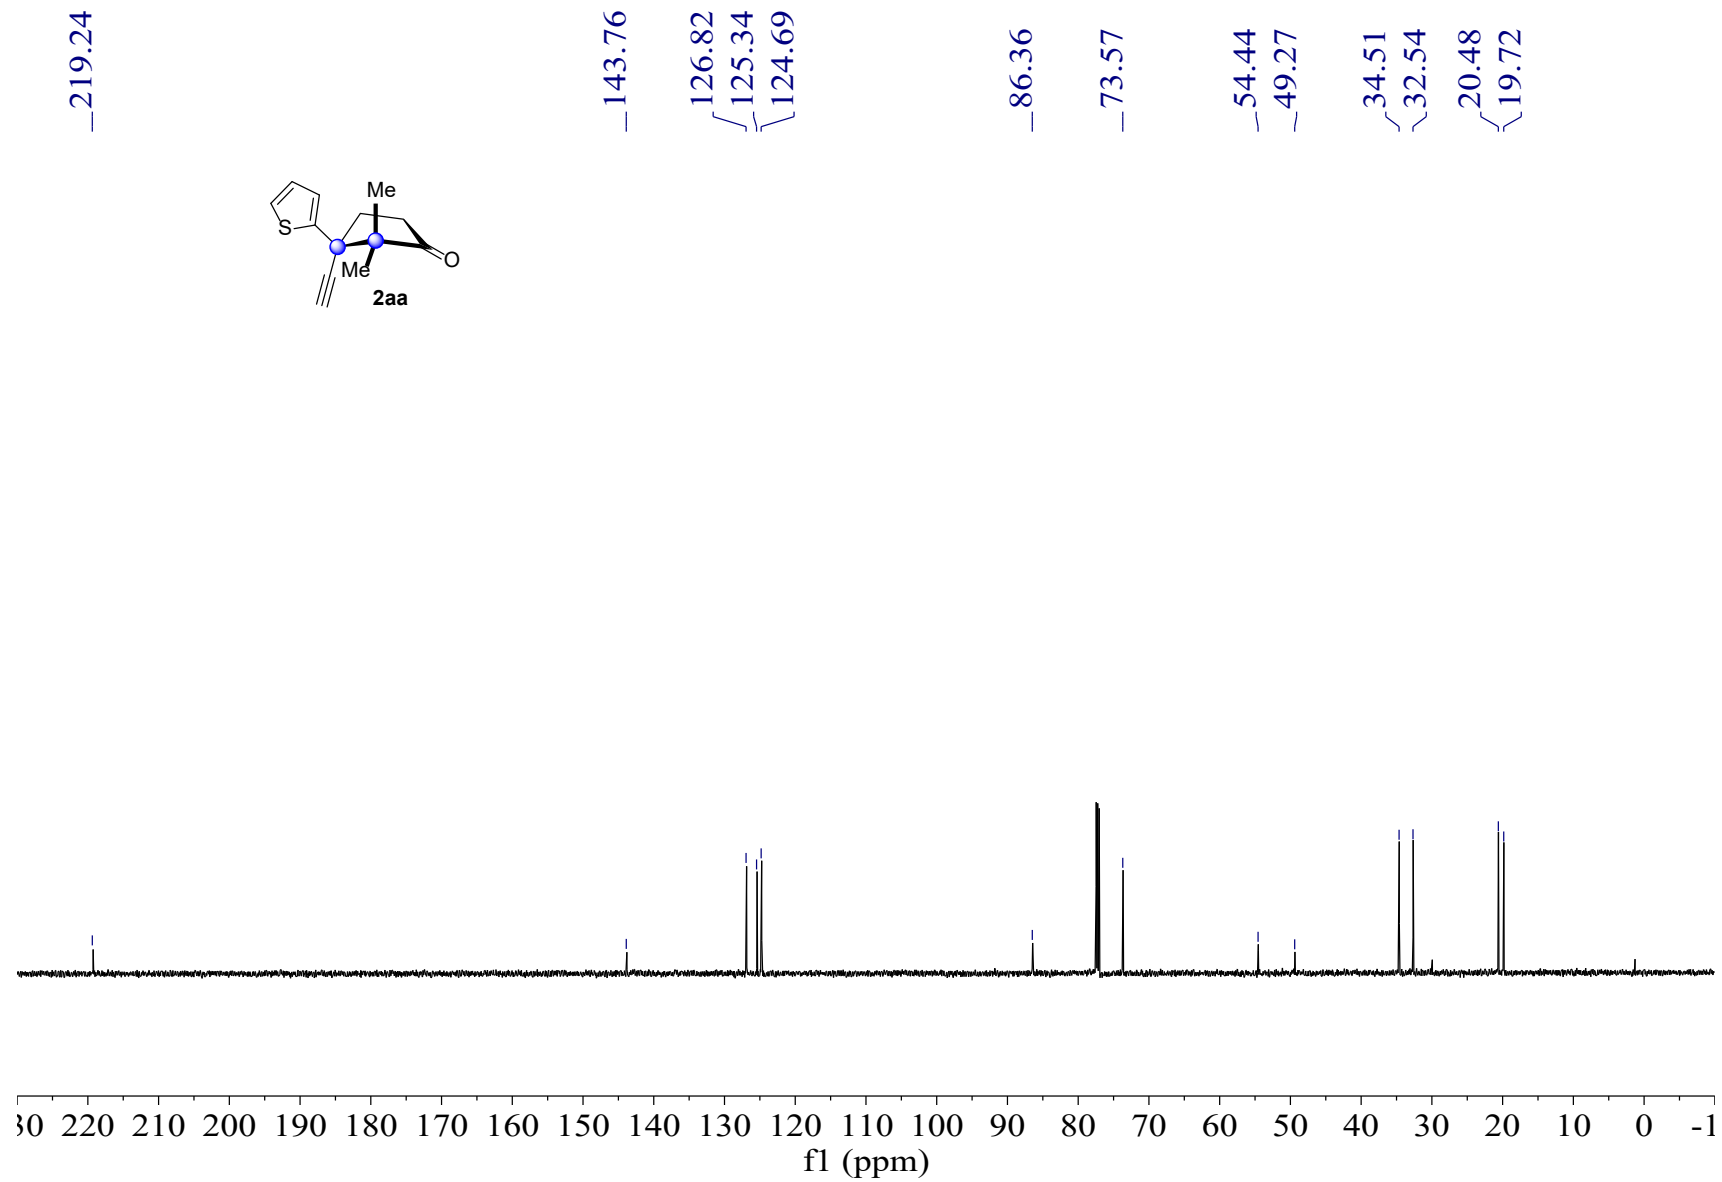

$^{13}\text{C}$  NMR spectrum of compound **2aa**

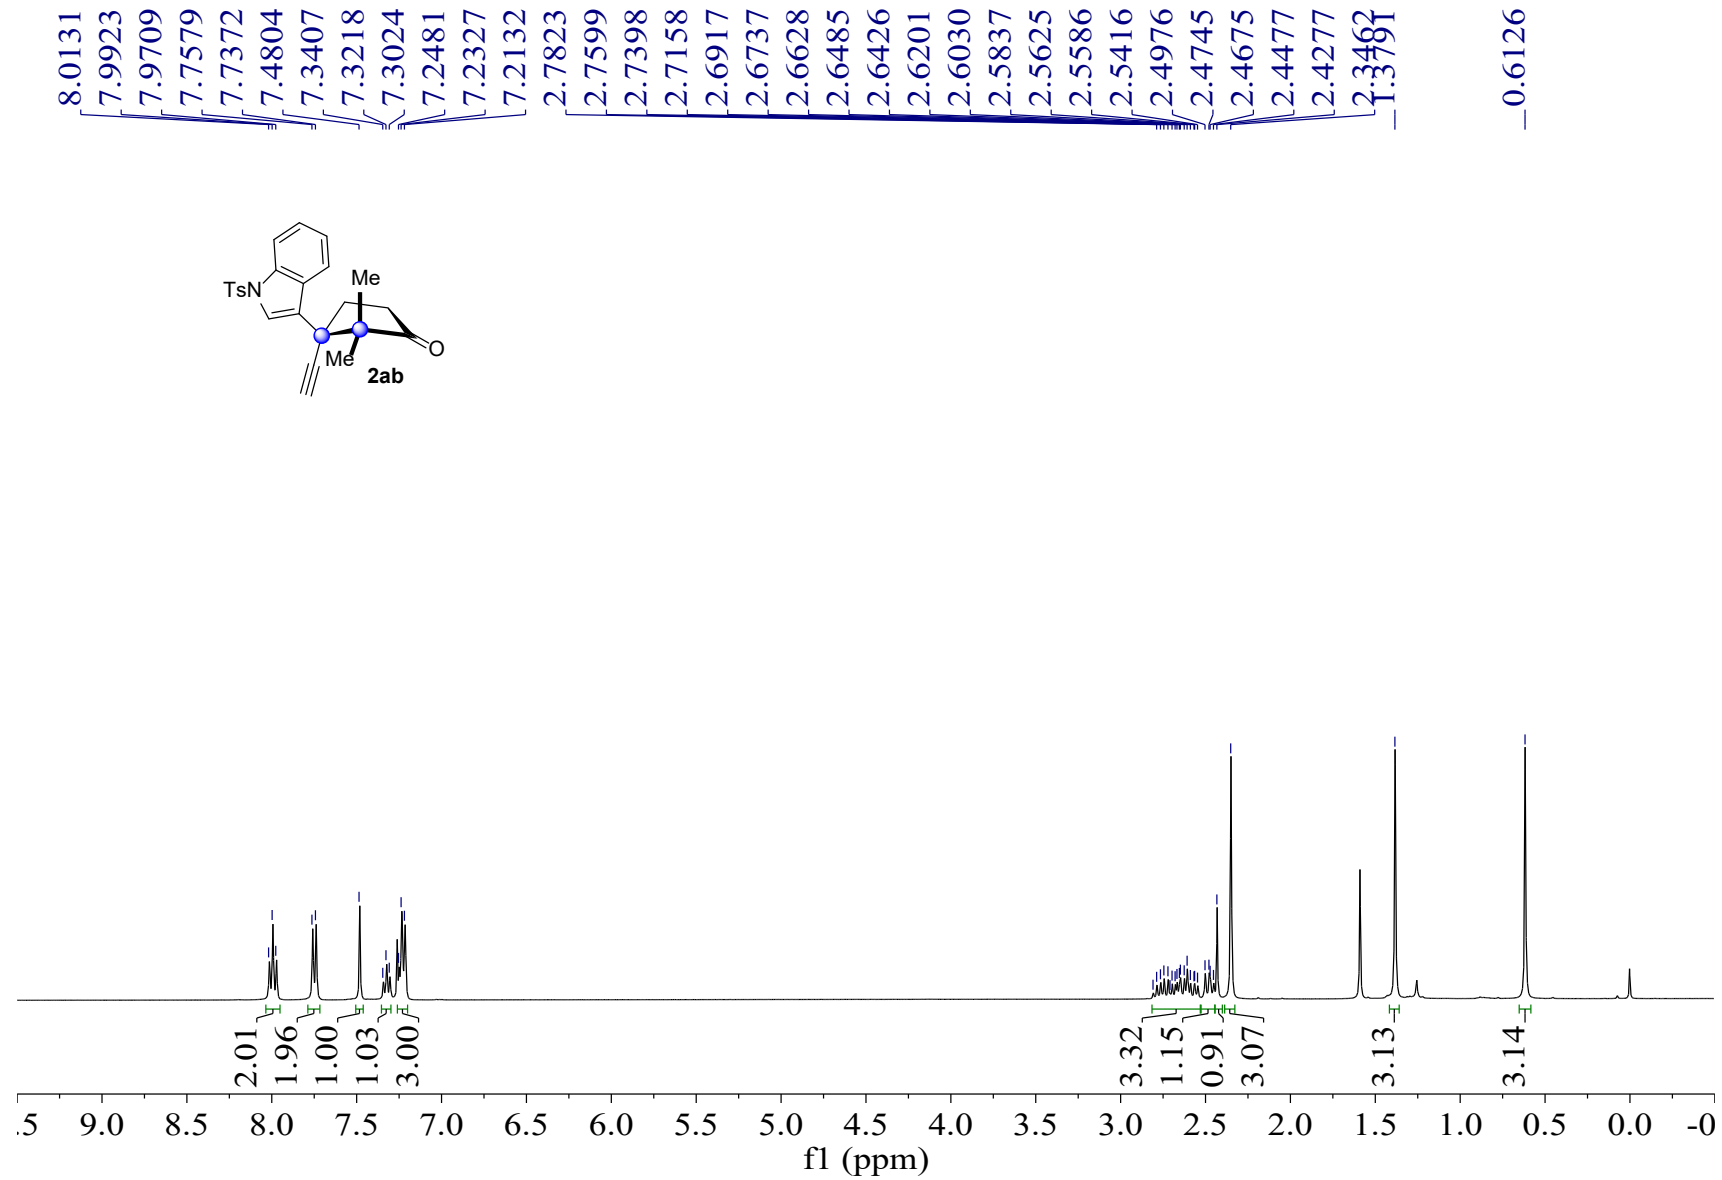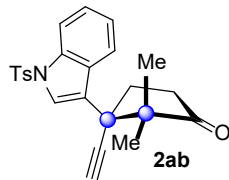

<sup>1</sup>H NMR spectrum of compound **2ab**



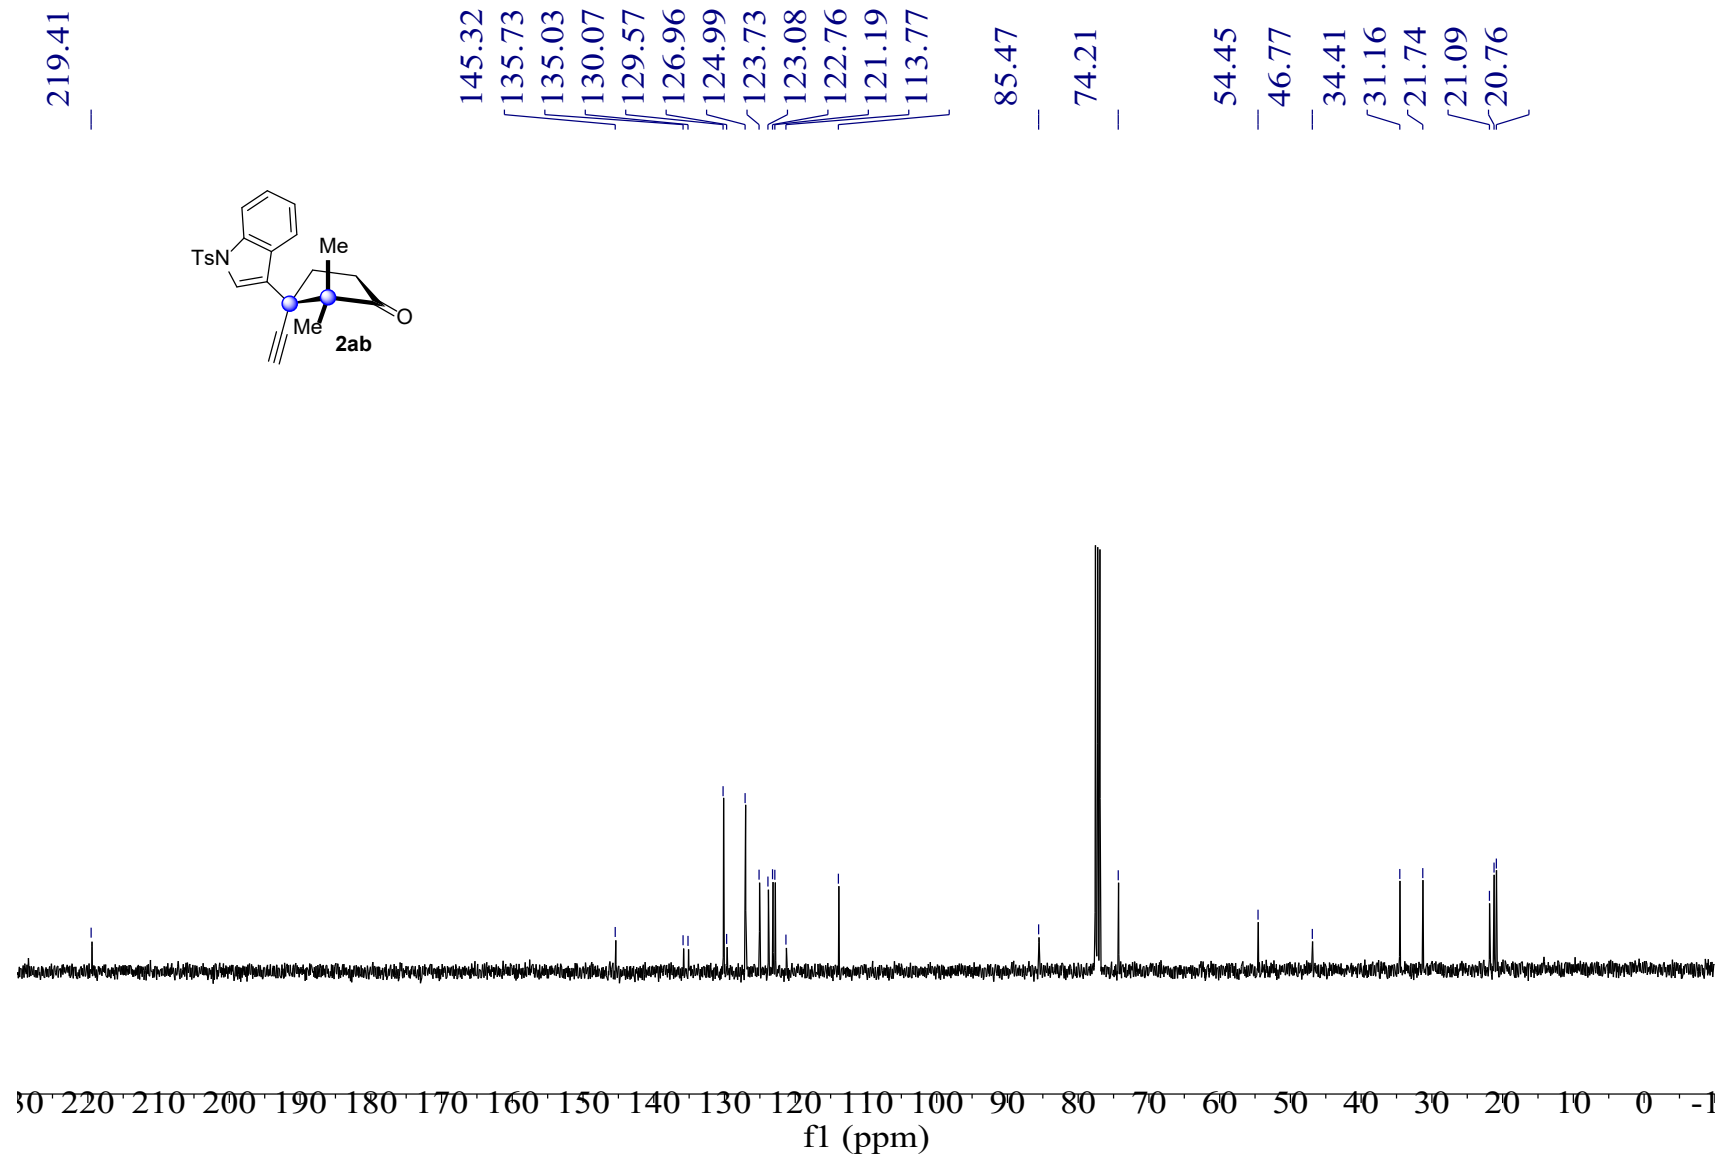

<sup>13</sup>C NMR spectrum of compound **2ab**

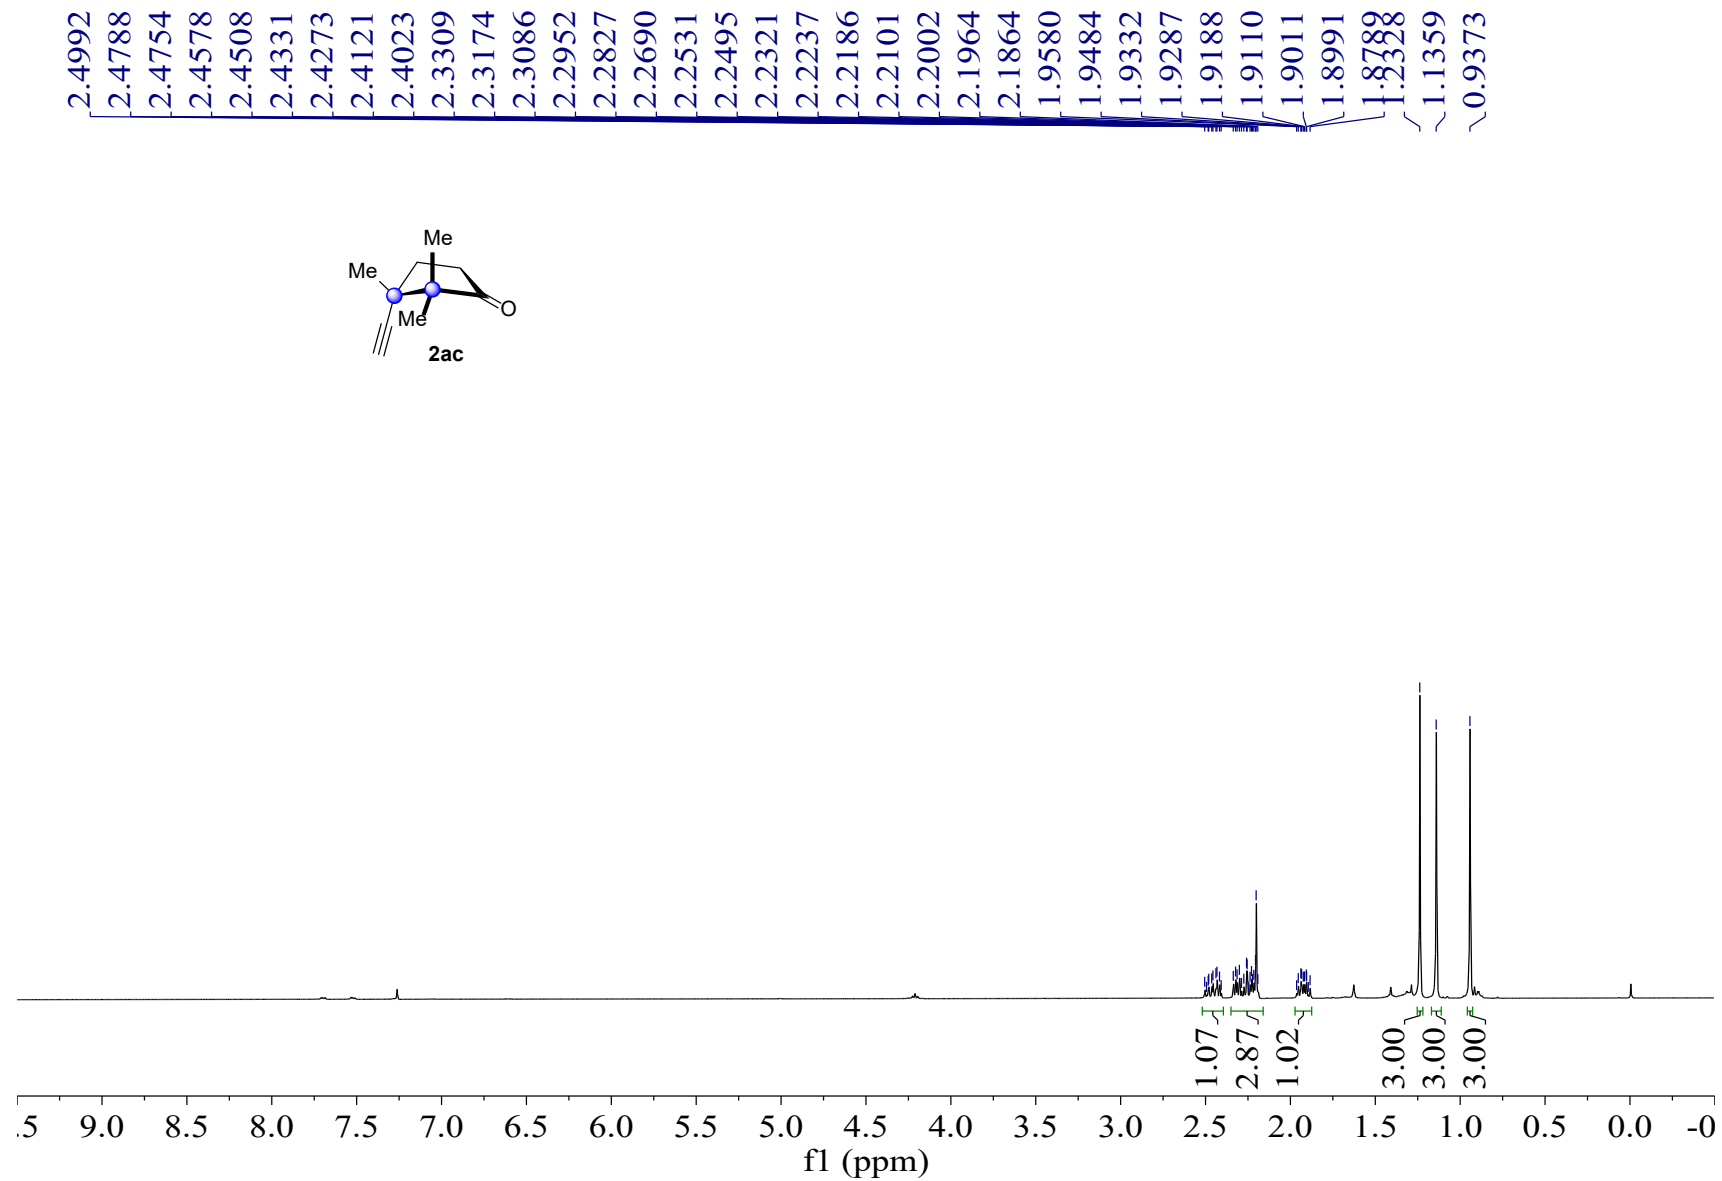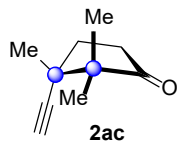

<sup>1</sup>H NMR spectrum of compound **2ac**



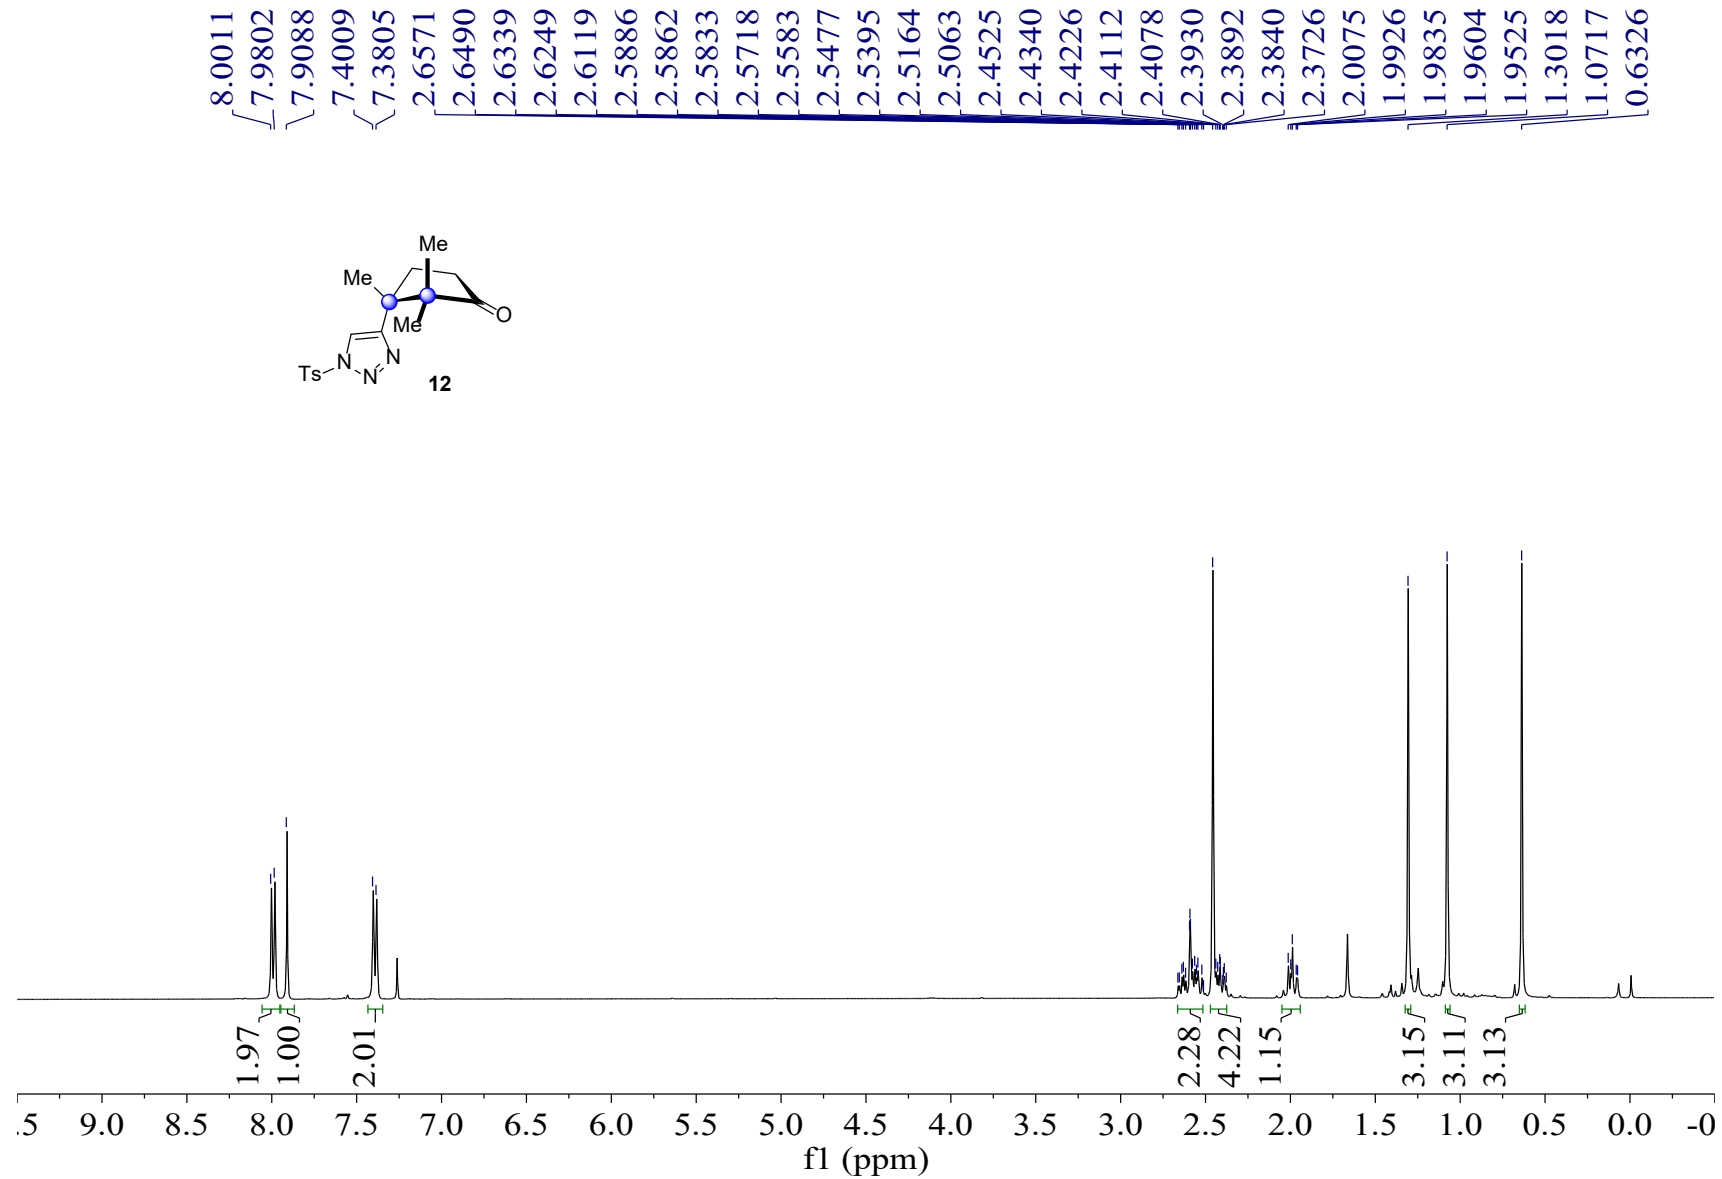

<sup>1</sup>H NMR spectrum of compound **12**

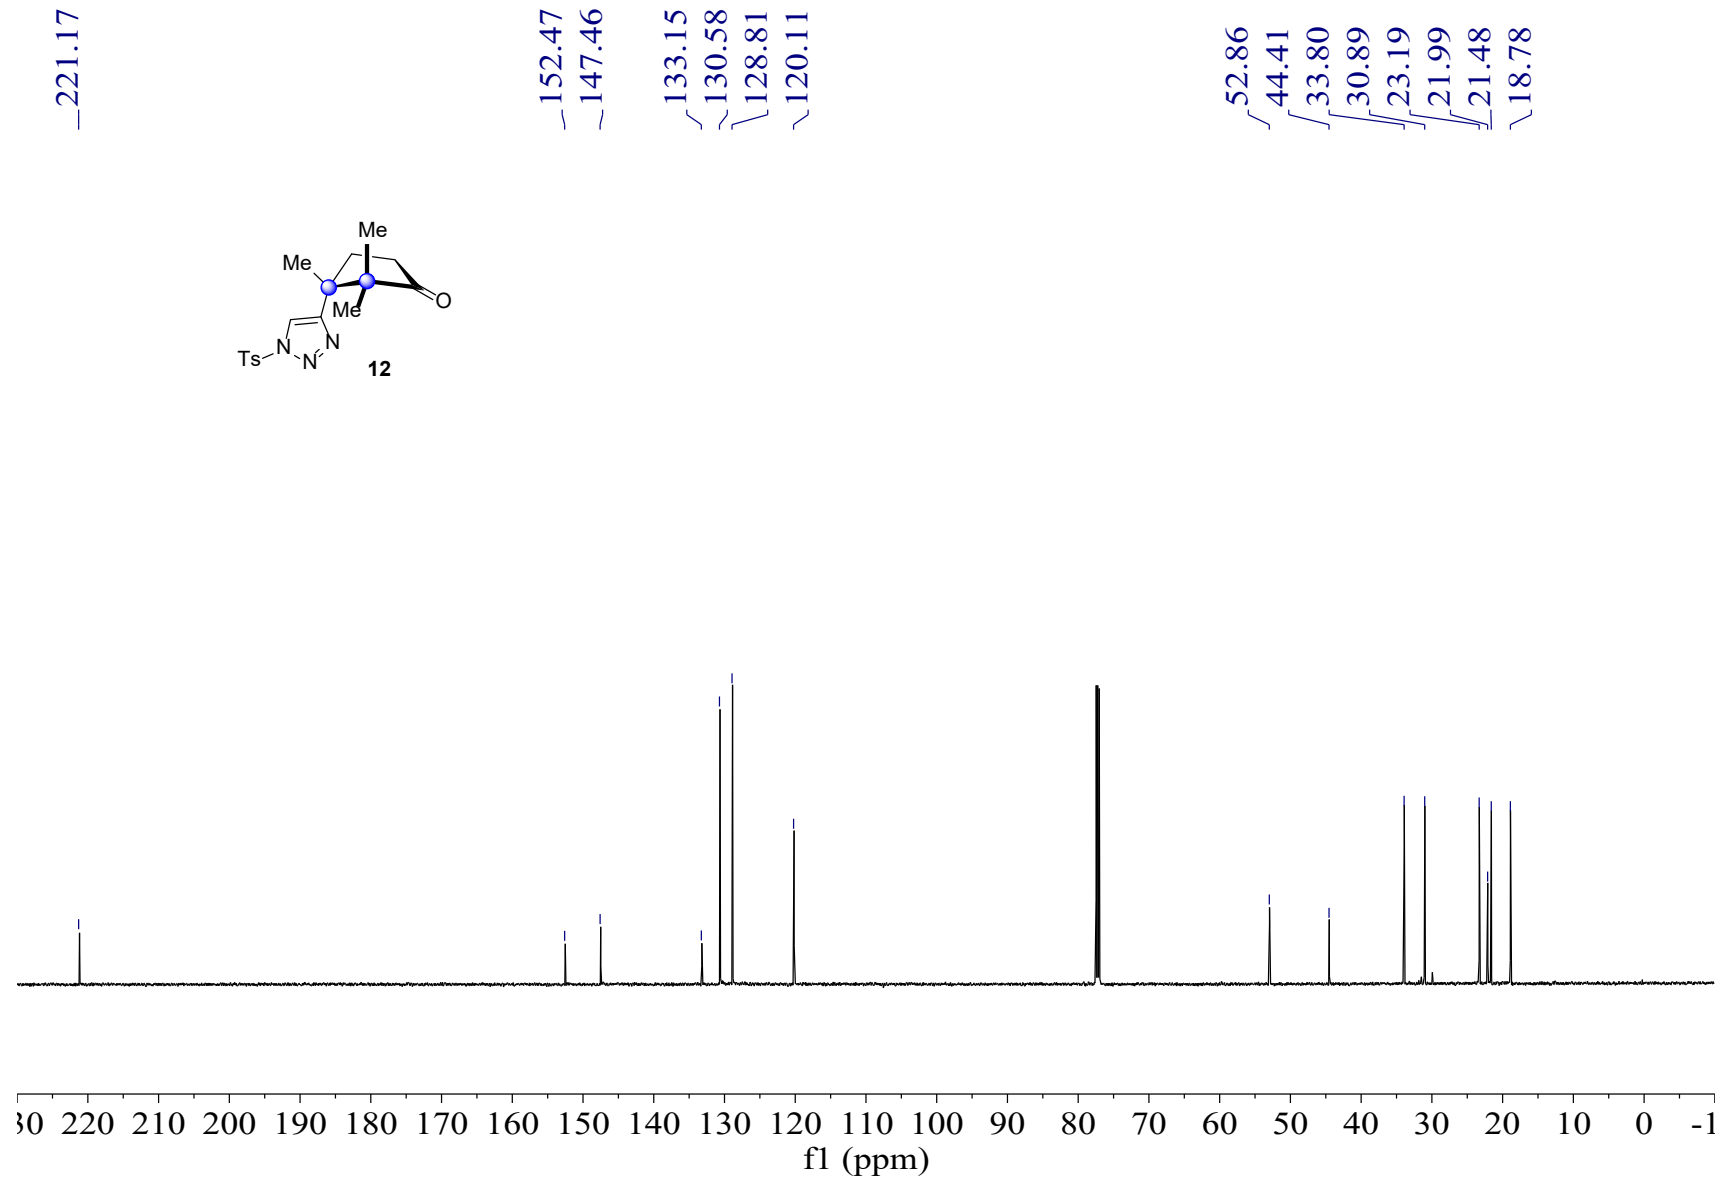

<sup>13</sup>C NMR spectrum of compound **12**

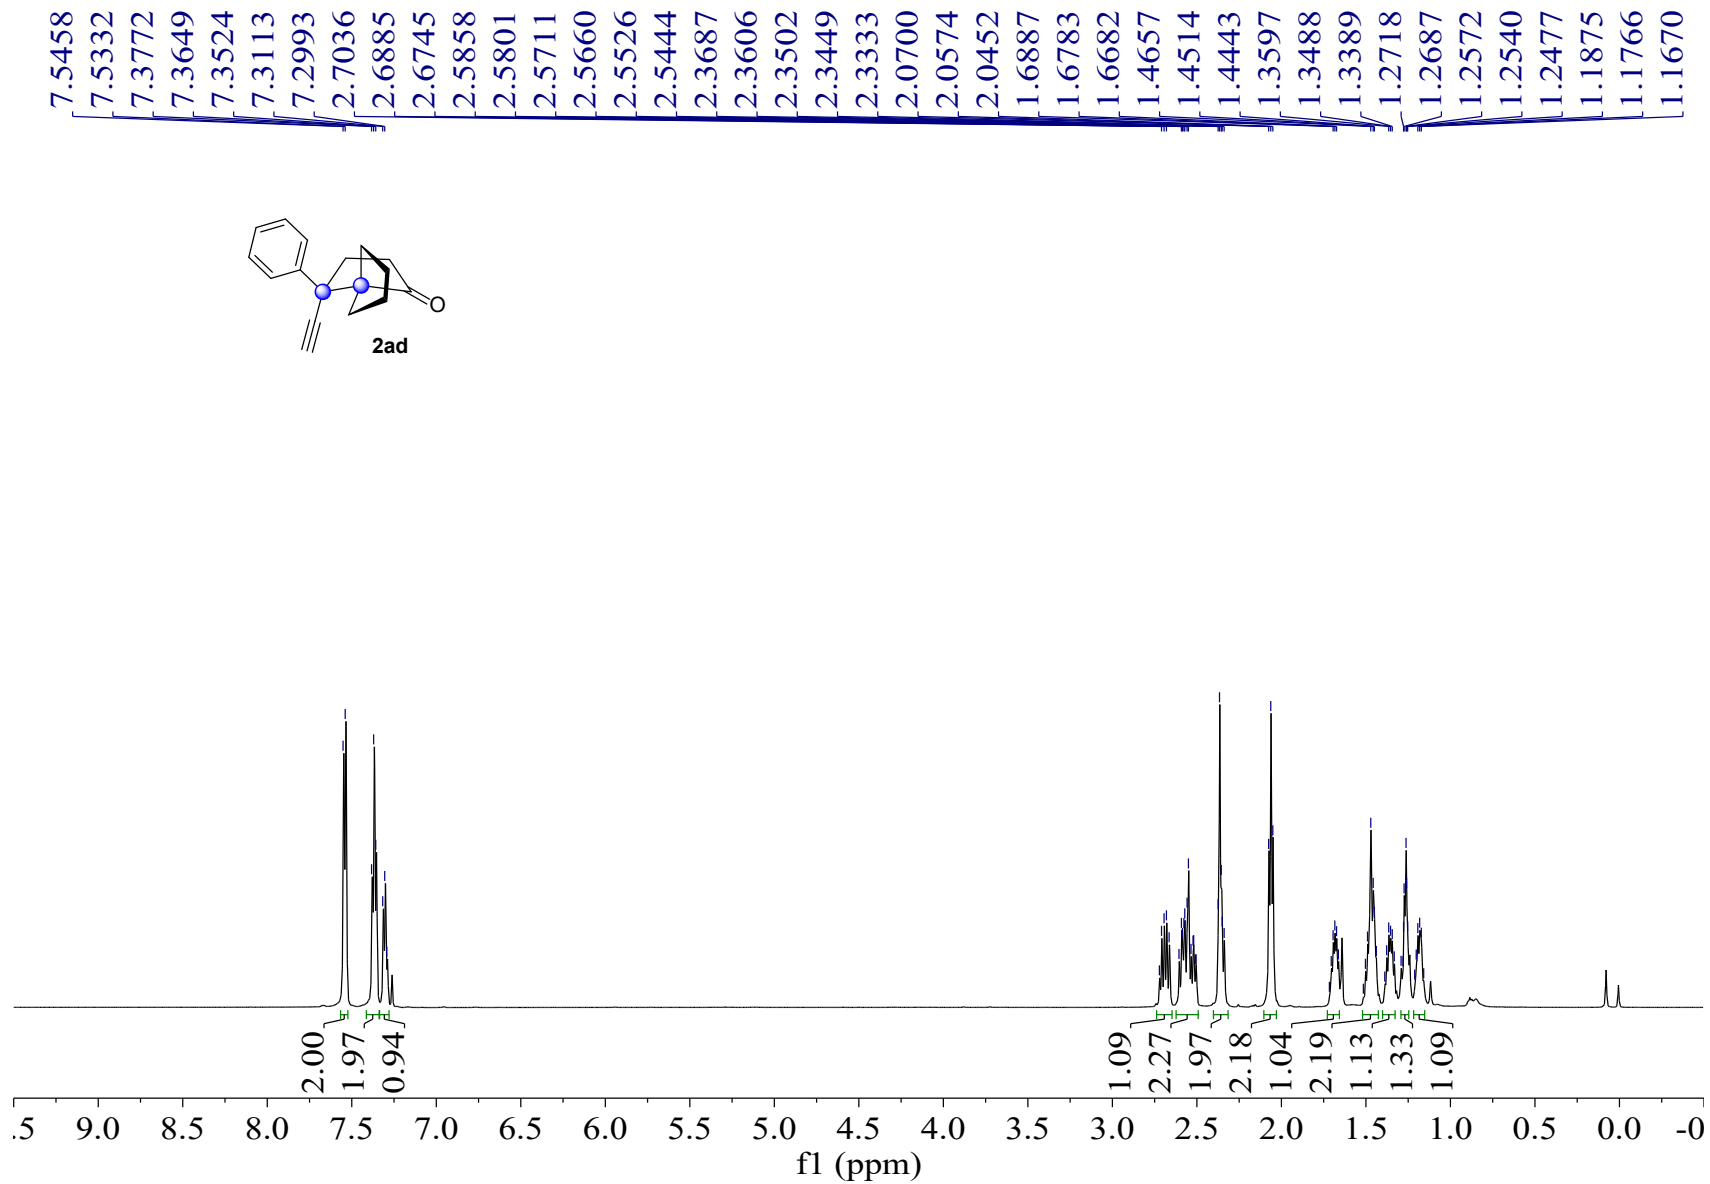

<sup>1</sup>H NMR spectrum of compound **2ad**

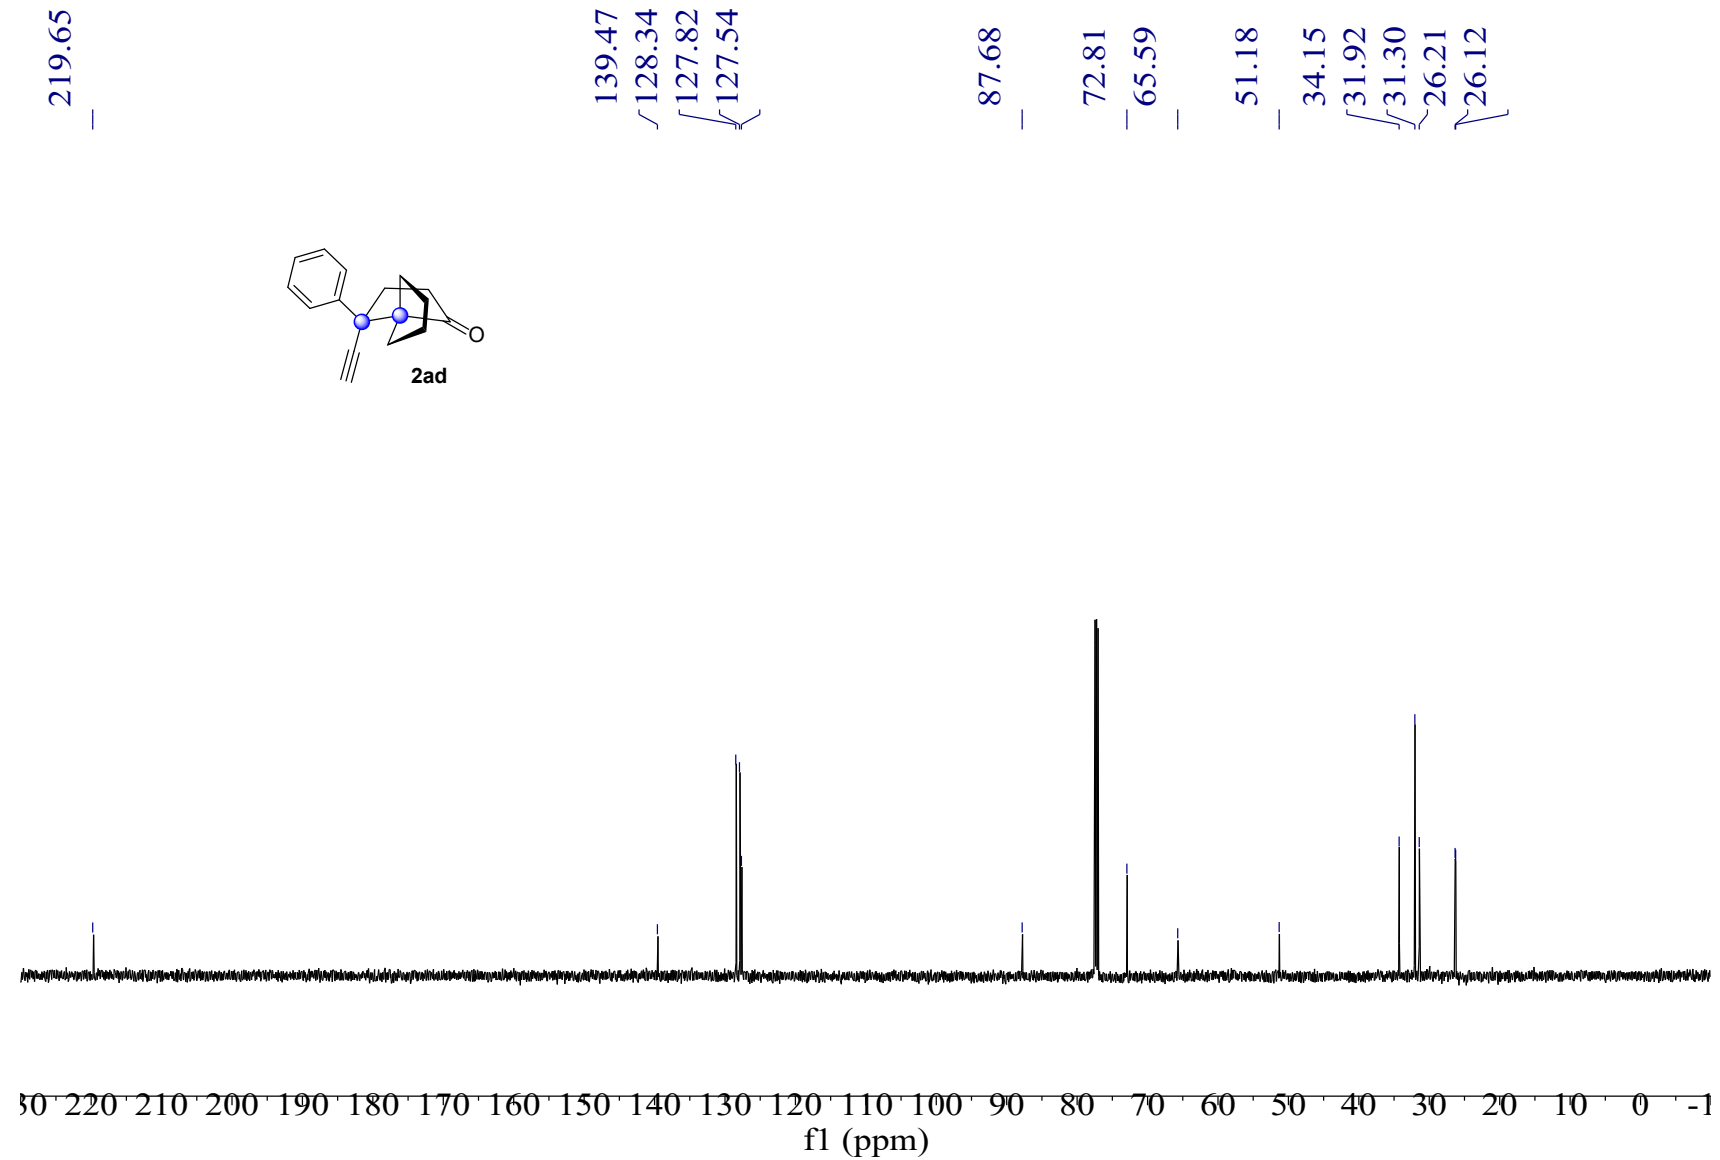

<sup>13</sup>C NMR spectrum of compound **2ad**

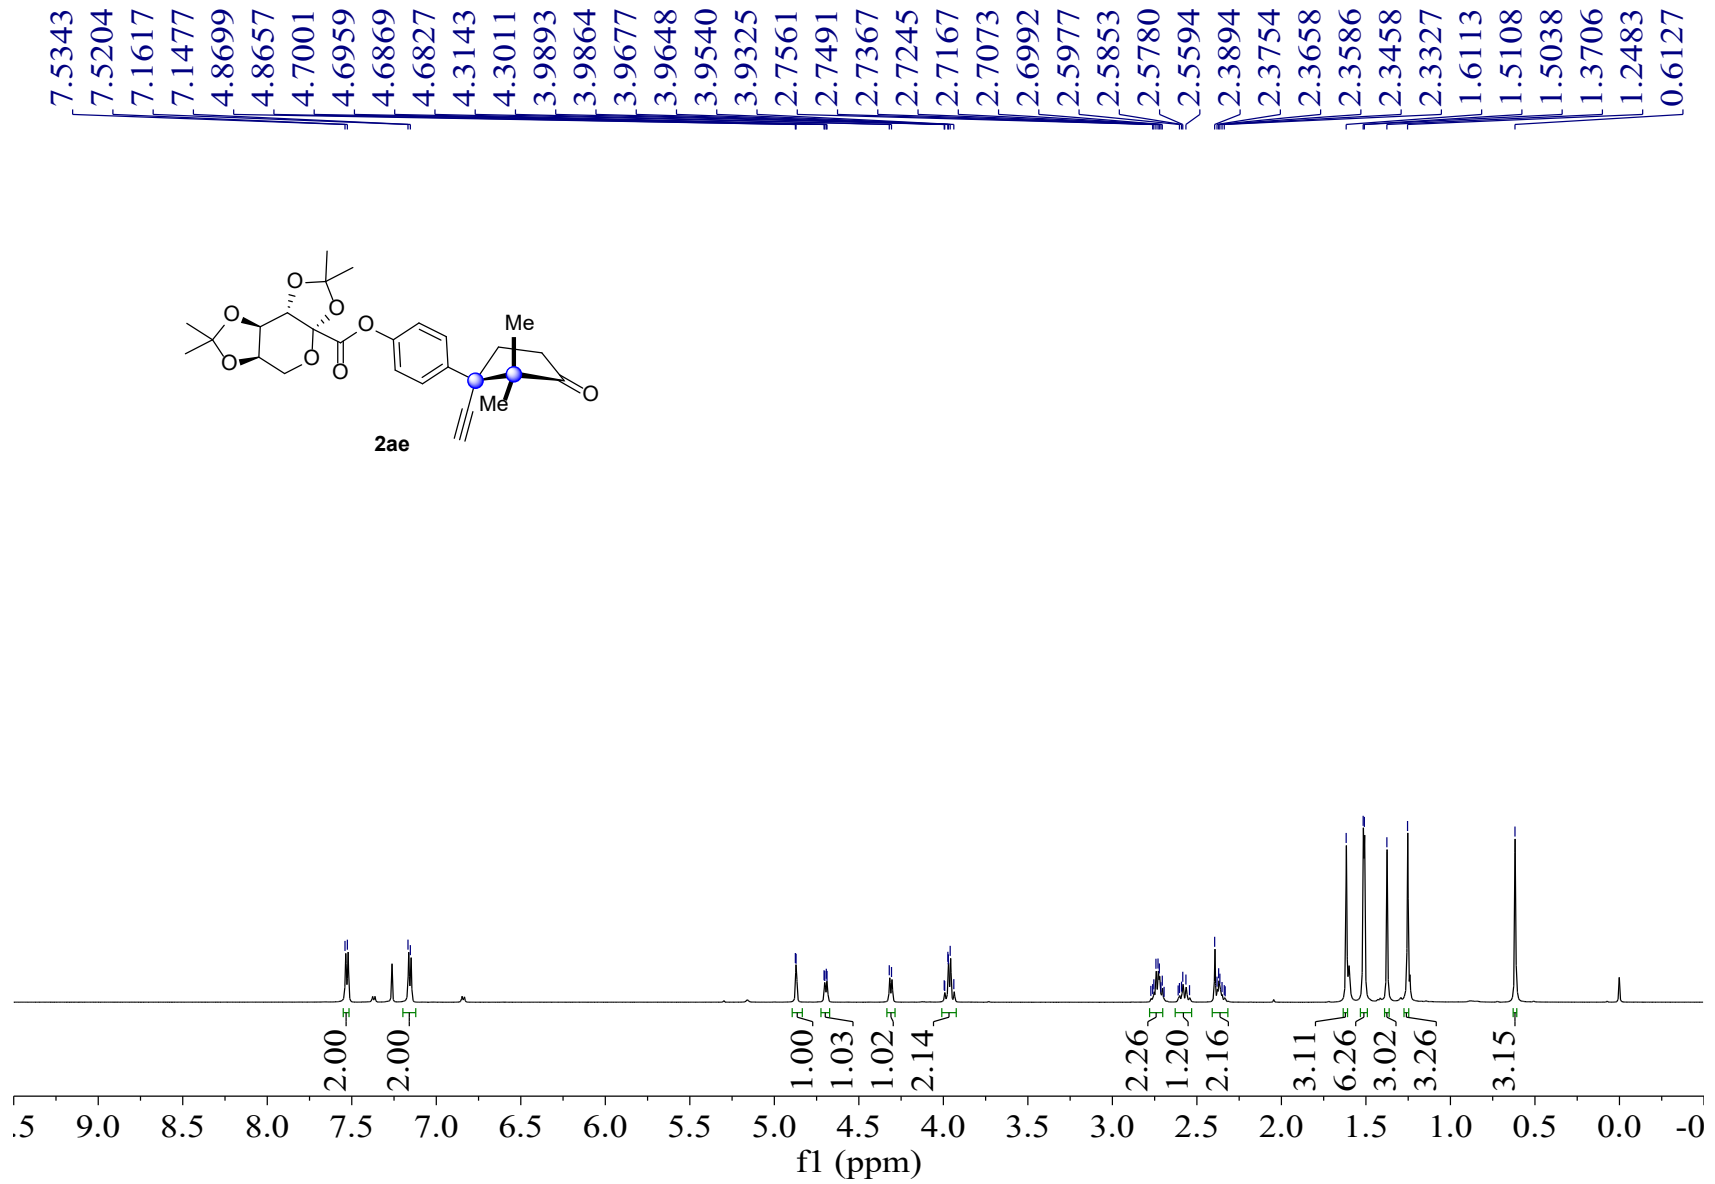

$^1\text{H}$  NMR spectrum of compound **2ae**



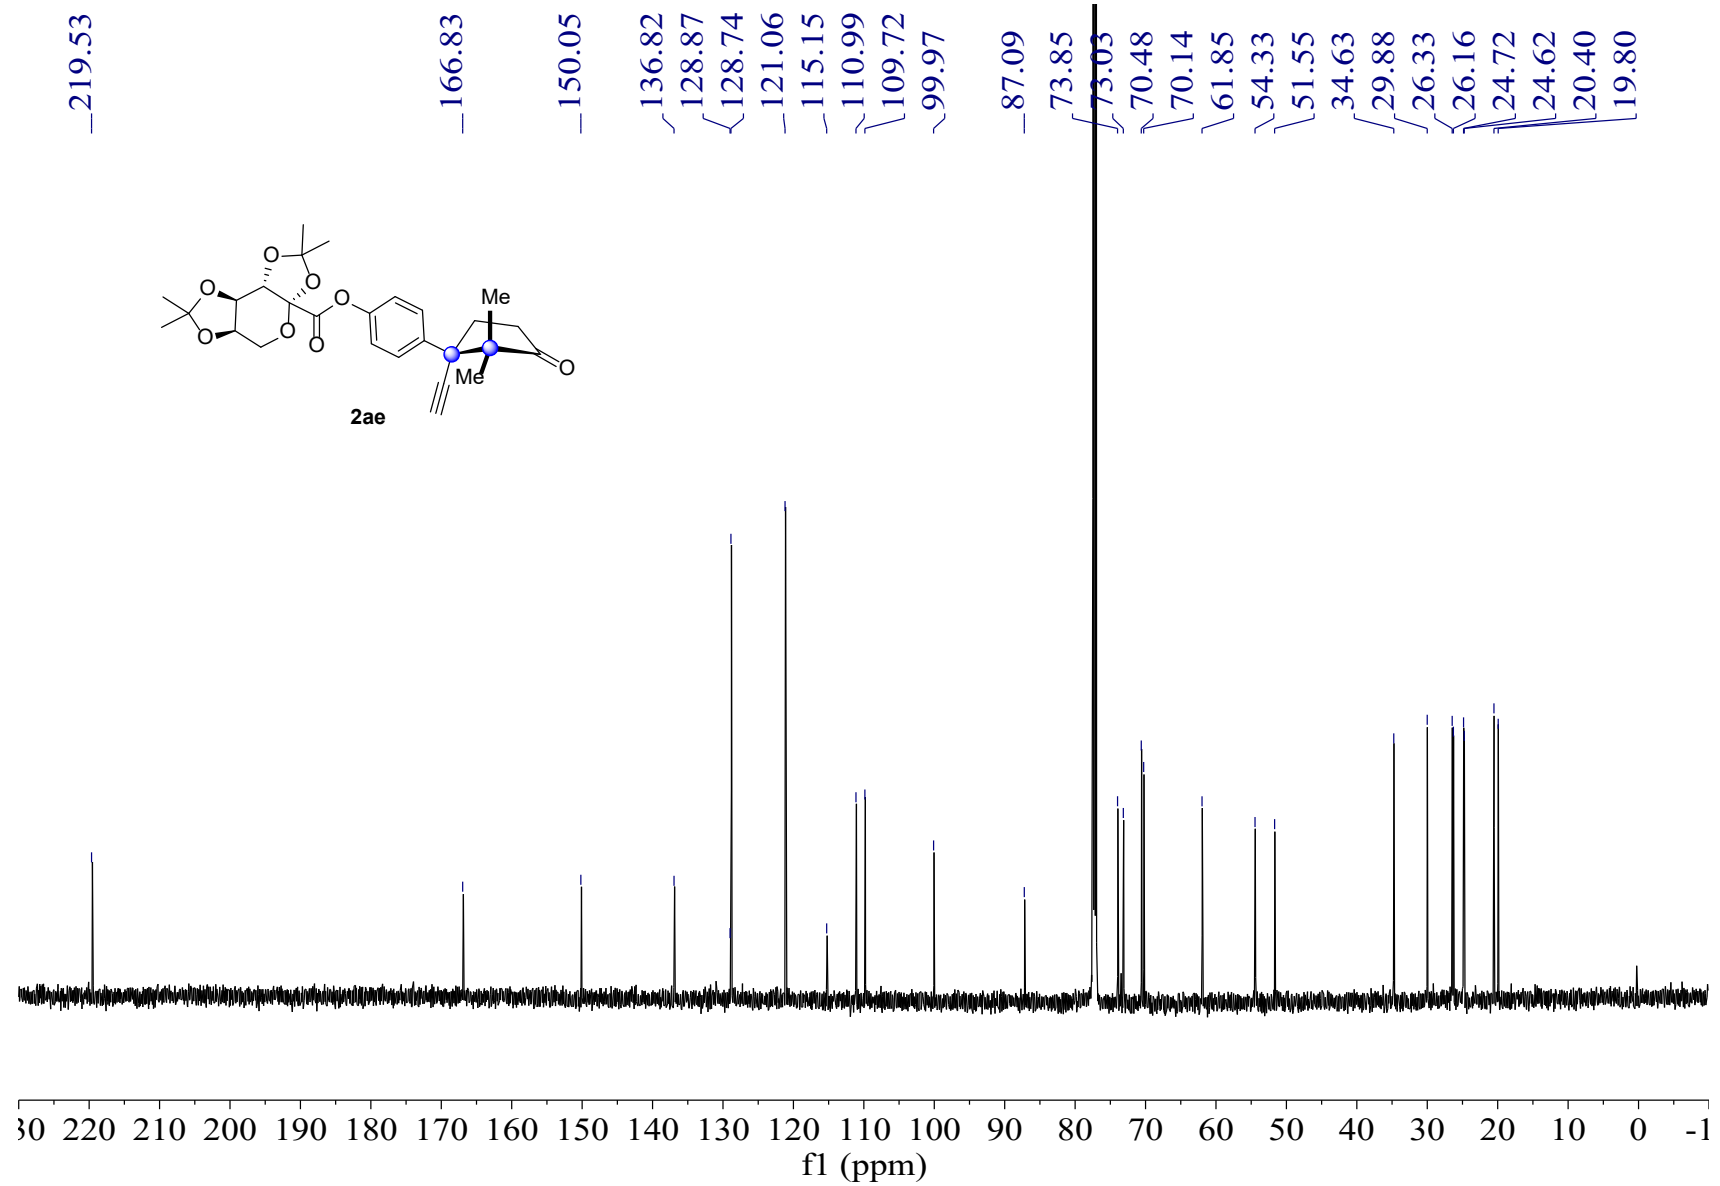

<sup>13</sup>C NMR spectrum of compound **2ae**

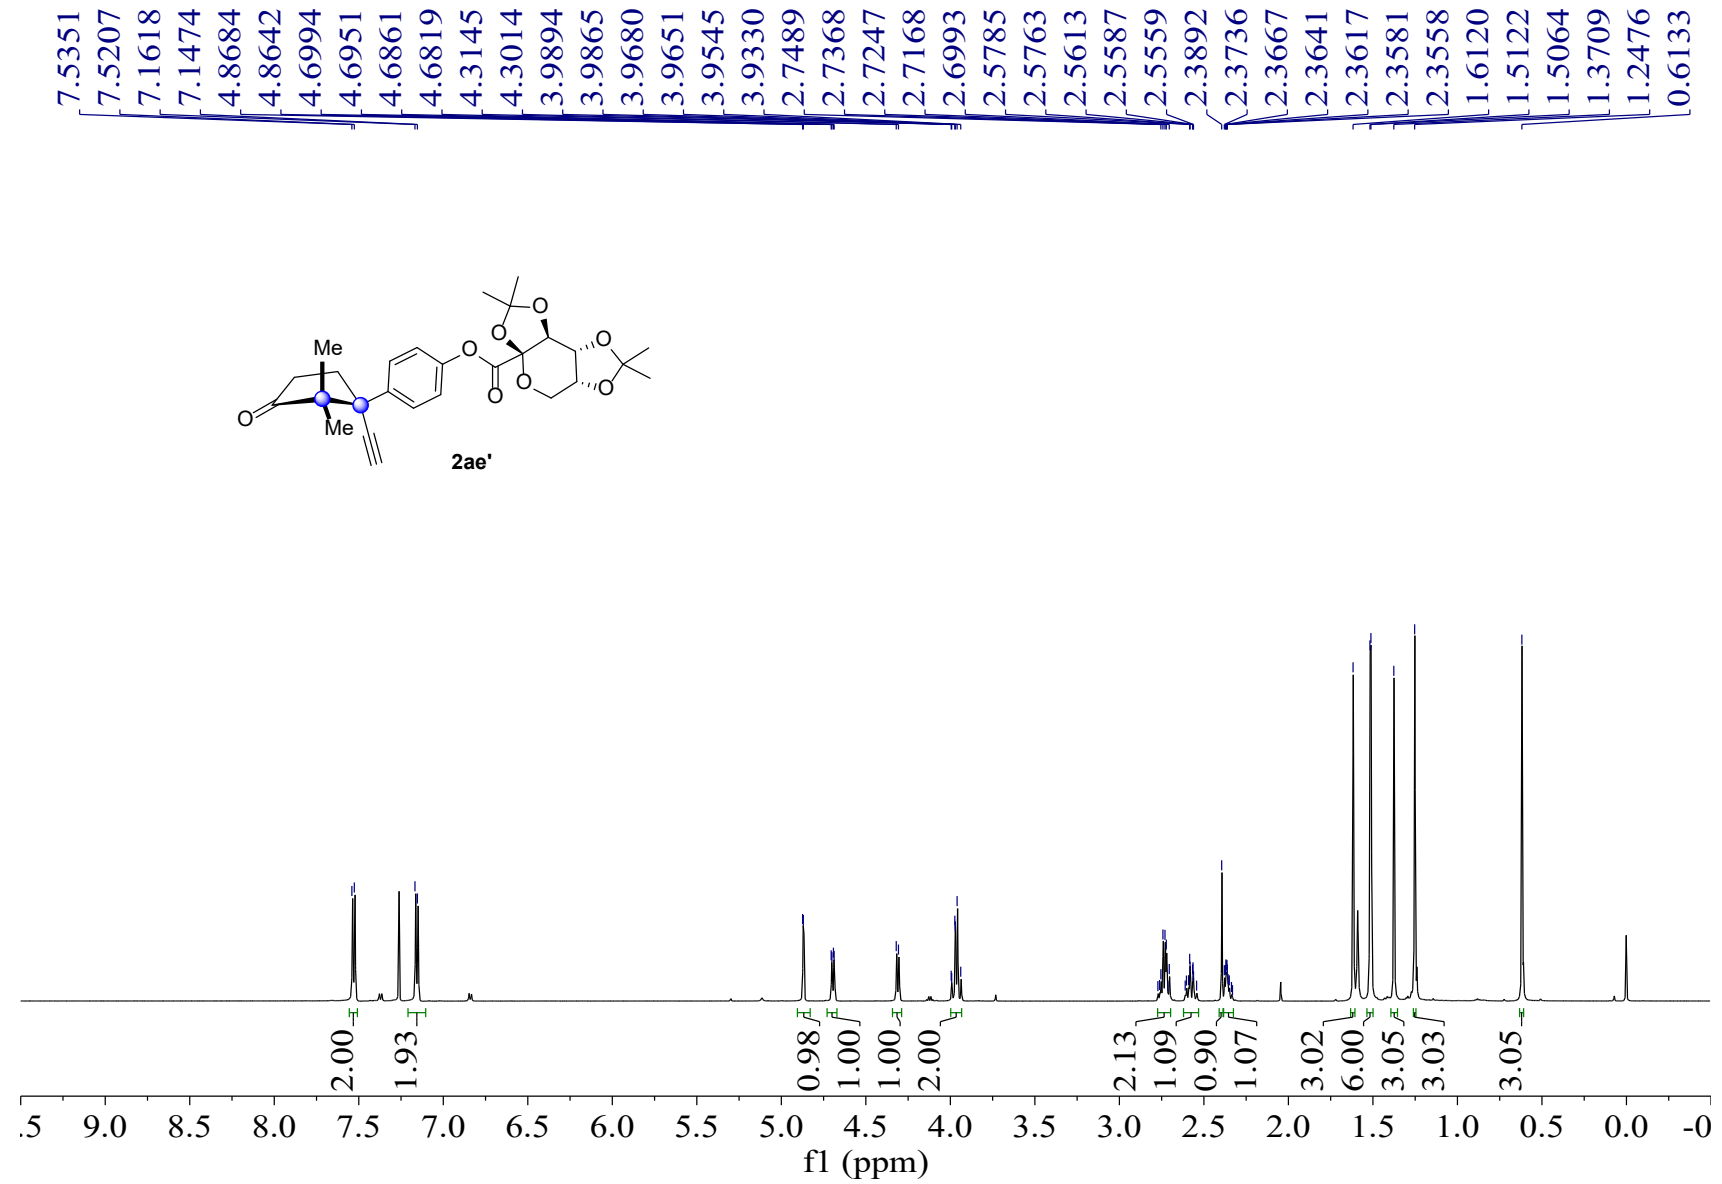

<sup>1</sup>H NMR spectrum of compound **2ae'**

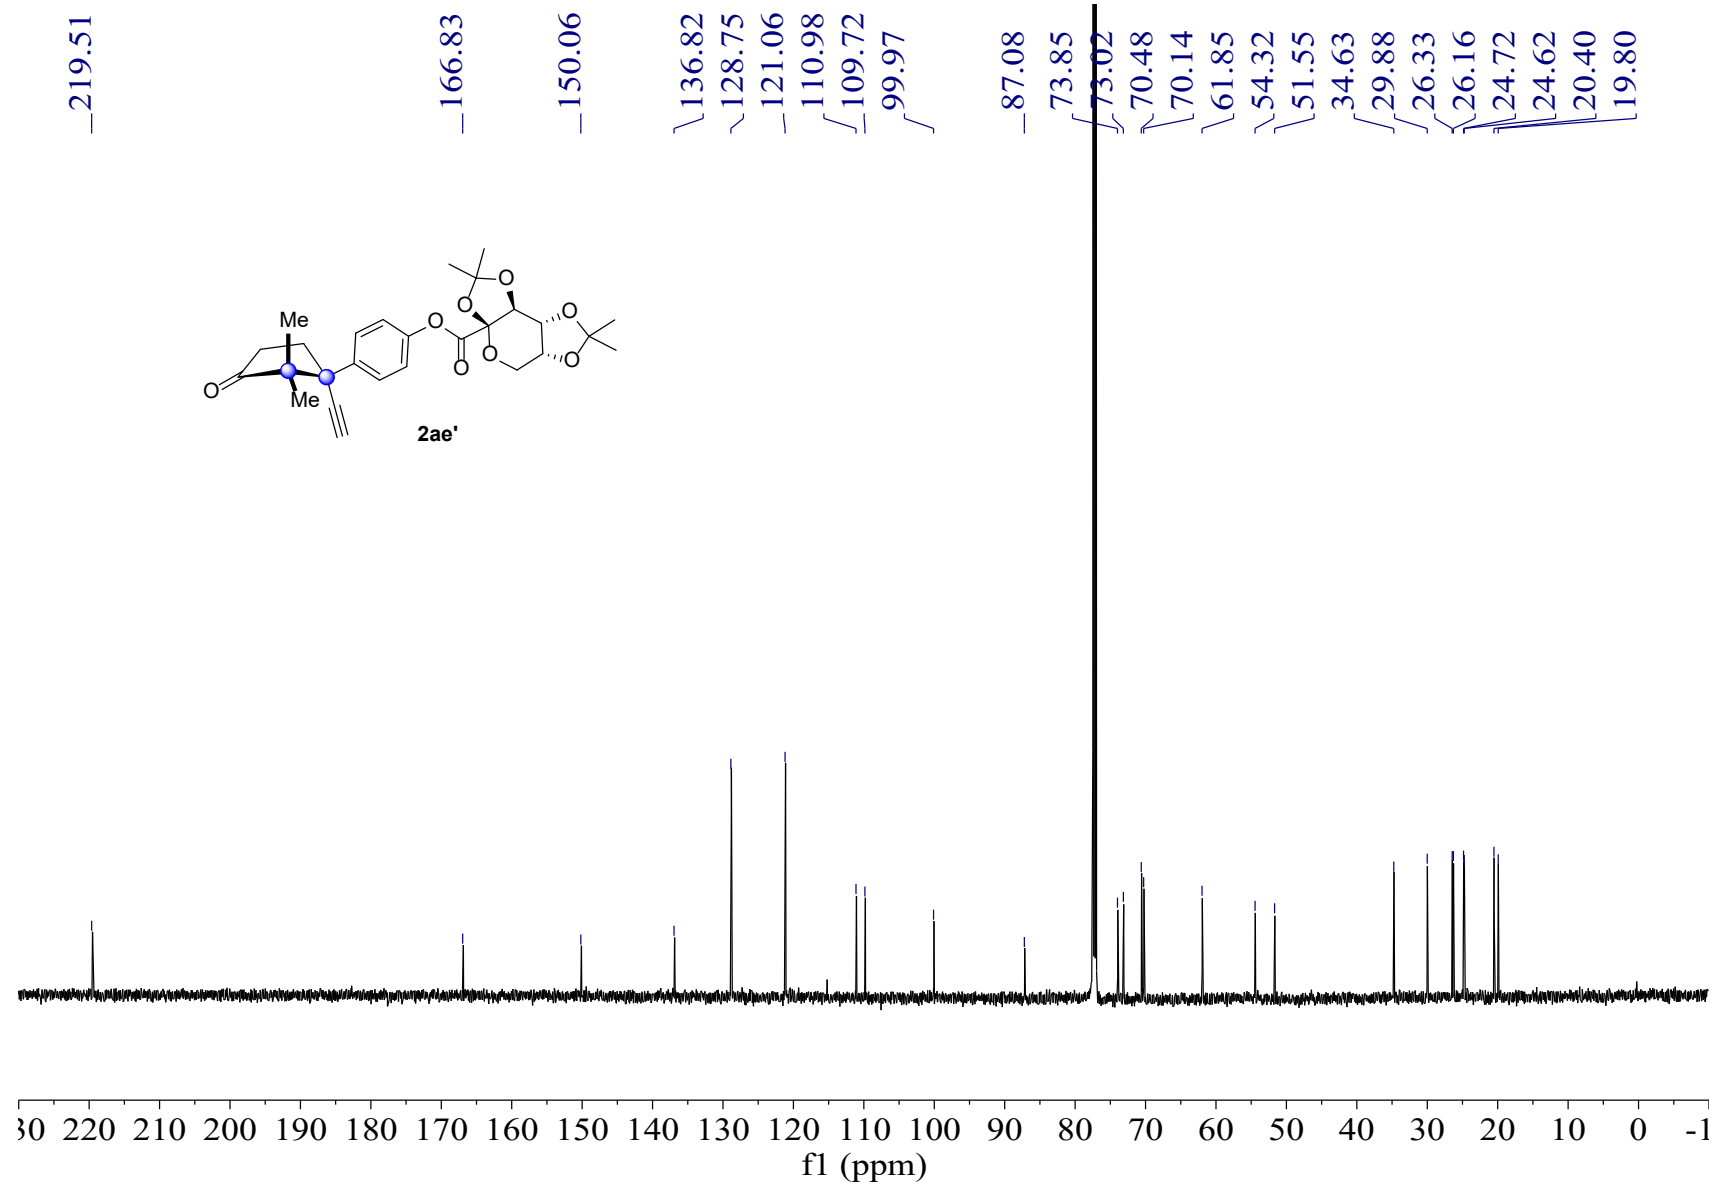

$^{13}\text{C}$  NMR spectrum of compound **2ae'**

7.7744  
7.7661  
7.7517  
7.7467  
7.7319  
7.5112  
7.4971  
7.4653  
7.4513  
7.1787  
7.1747  
7.1640  
7.1599  
7.1460  
7.1419  
7.0174  
7.0032  
4.1234  
4.1117  
4.0999  
4.0880  
3.9247  
2.7293  
2.7157  
2.7053  
2.7020  
2.6948  
2.6836  
2.5741  
2.5669  
2.5549  
2.5377  
2.3673  
2.3440  
2.3311  
2.3260  
2.3103  
1.7064  
1.6945  
1.2215  
0.5812

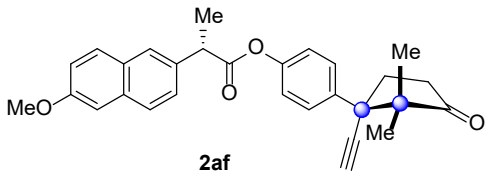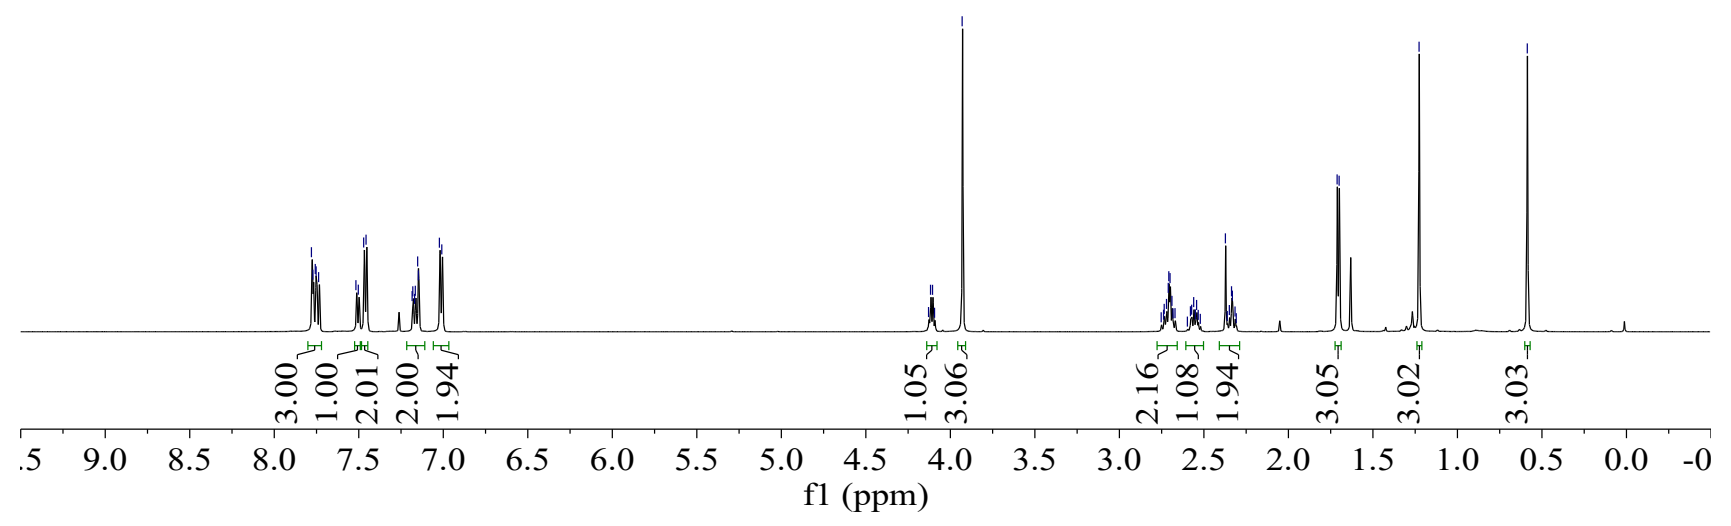

<sup>1</sup>H NMR spectrum of compound **2af**

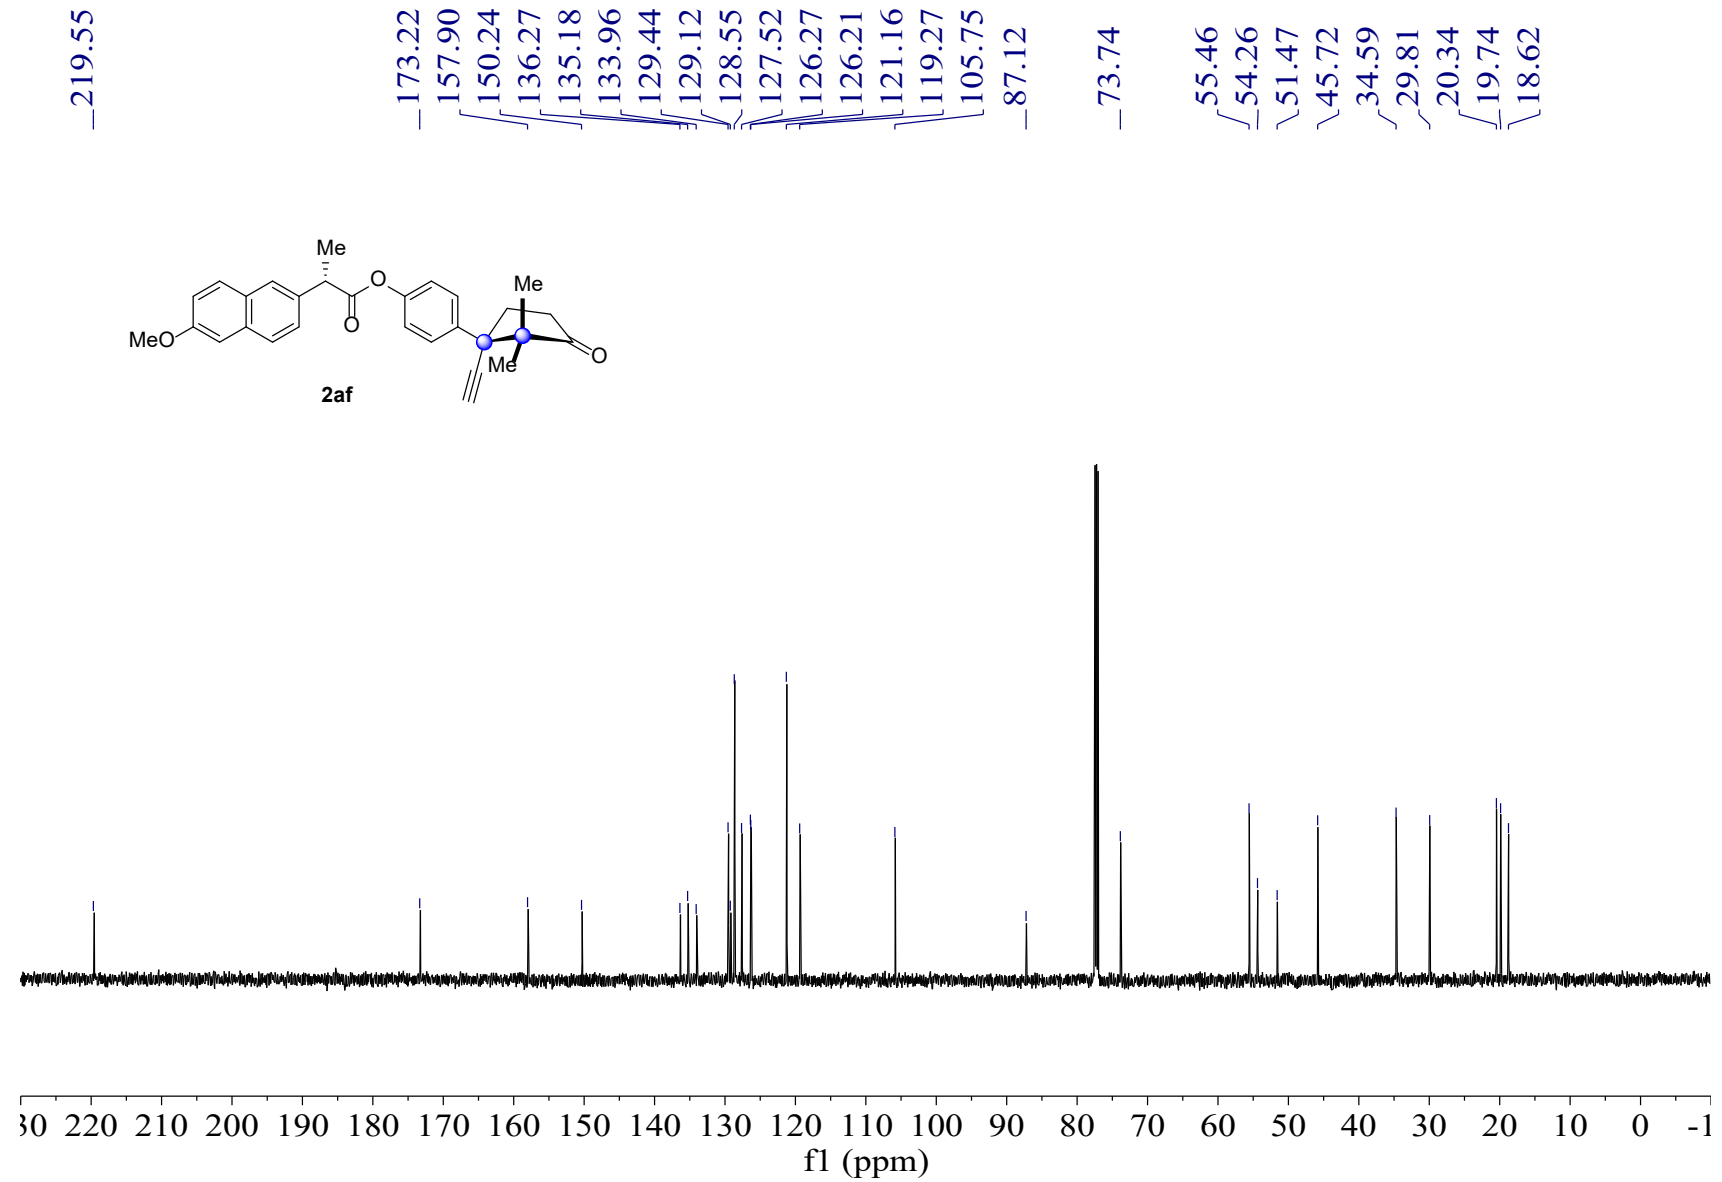

<sup>13</sup>C NMR spectrum of compound **2af**

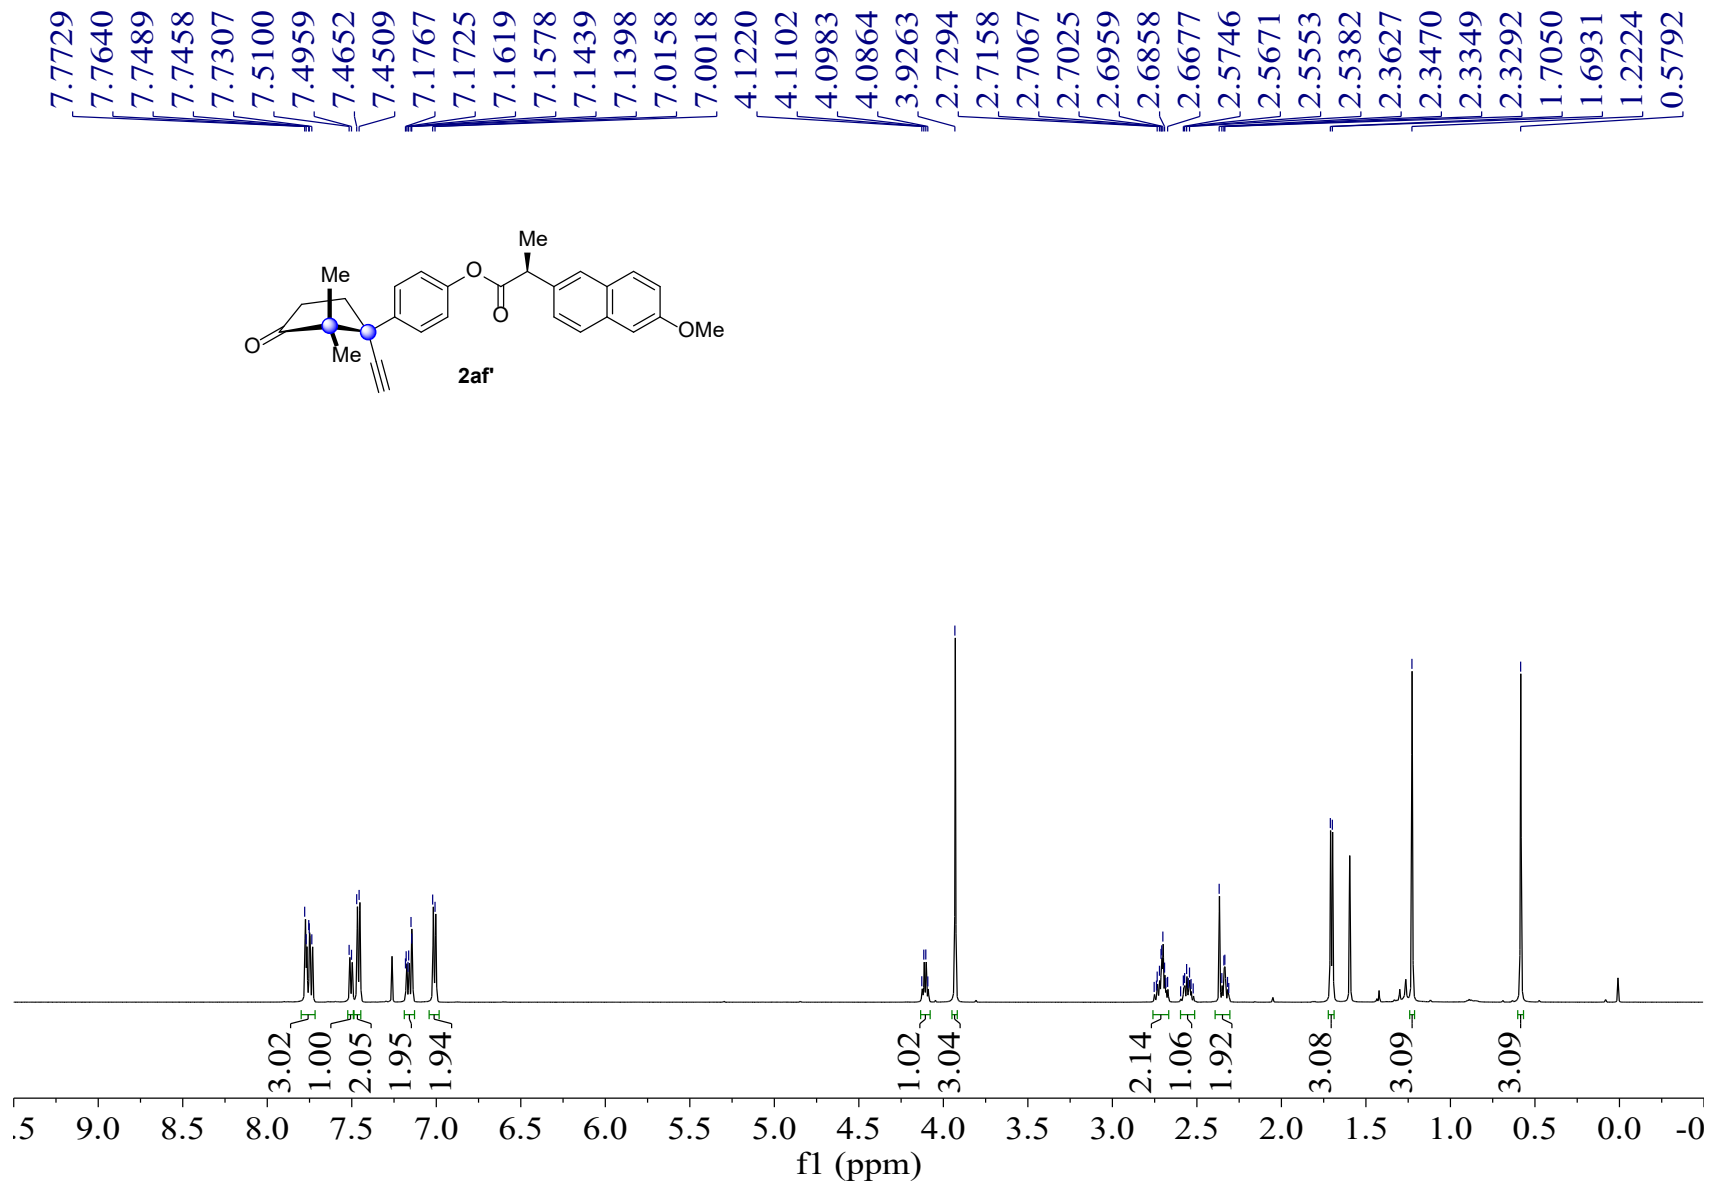

<sup>1</sup>H NMR spectrum of compound **2af'**

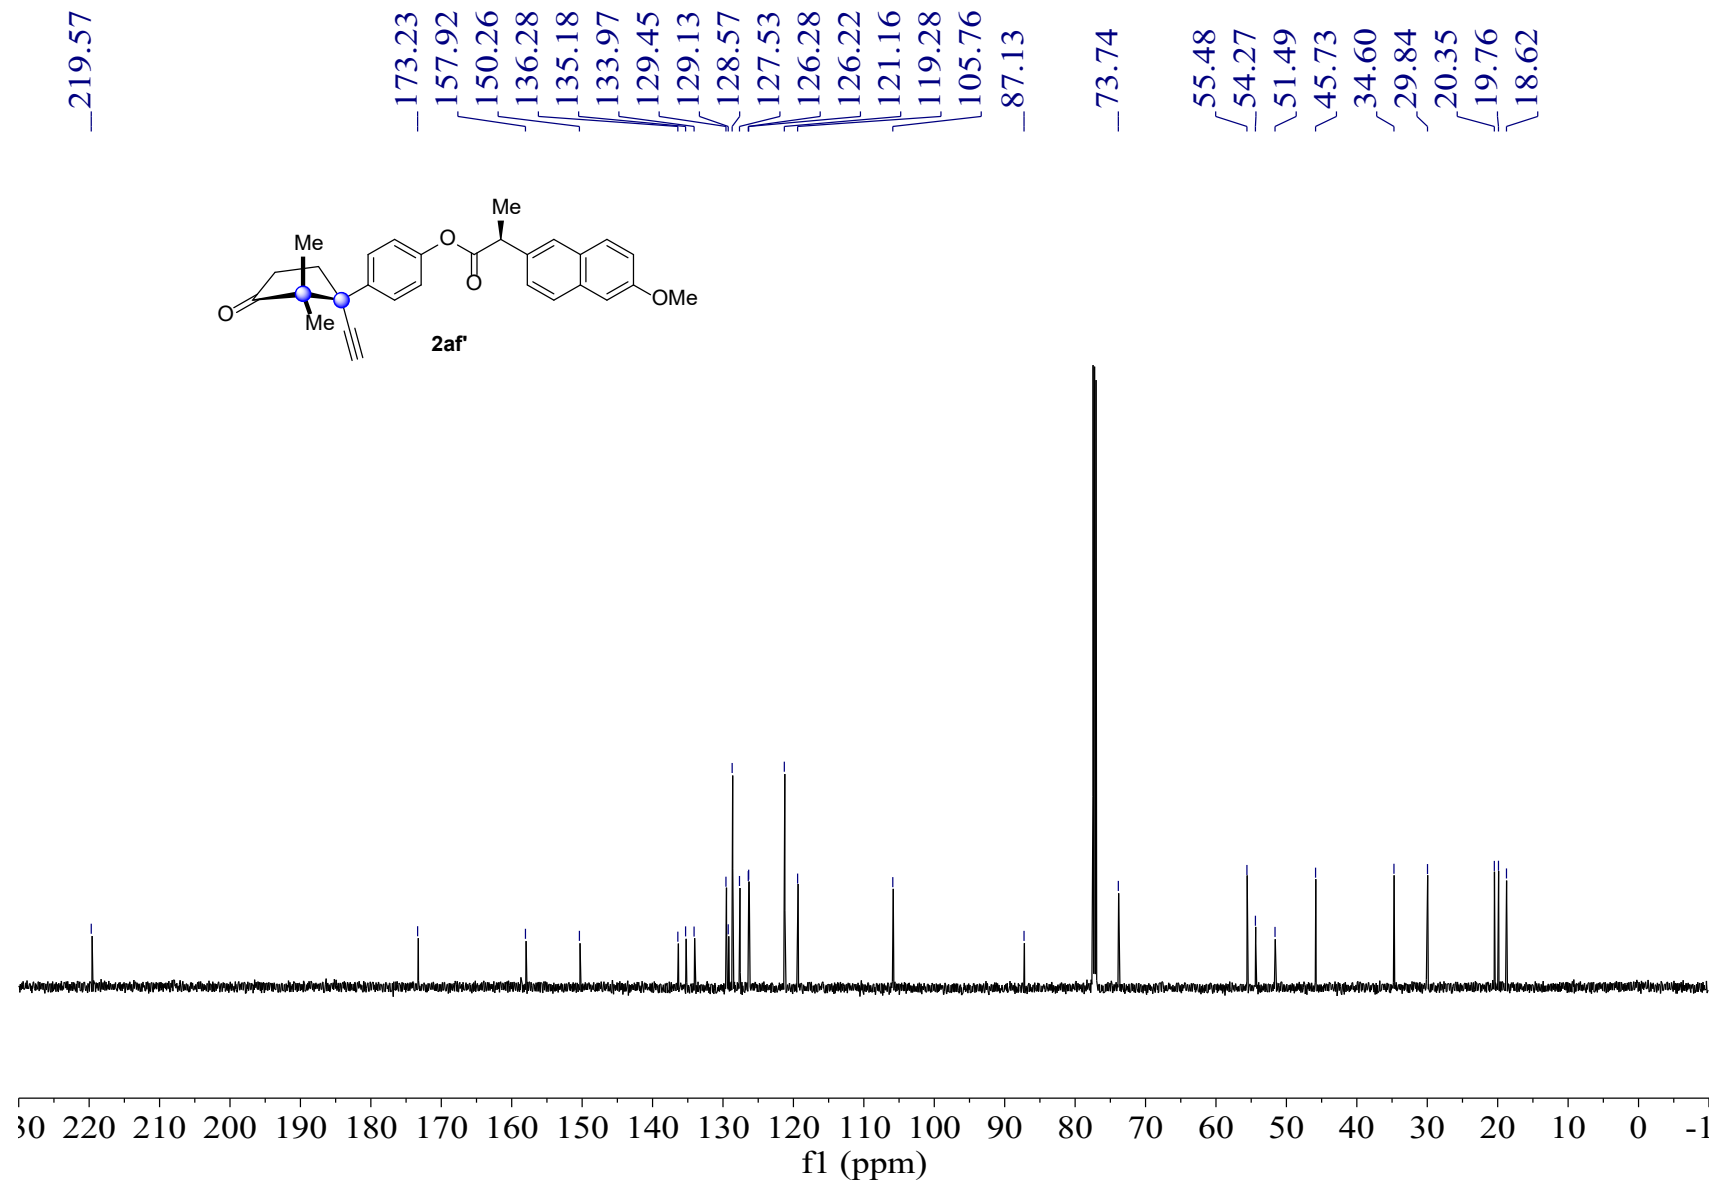

<sup>13</sup>C NMR spectrum of compound **2af'**

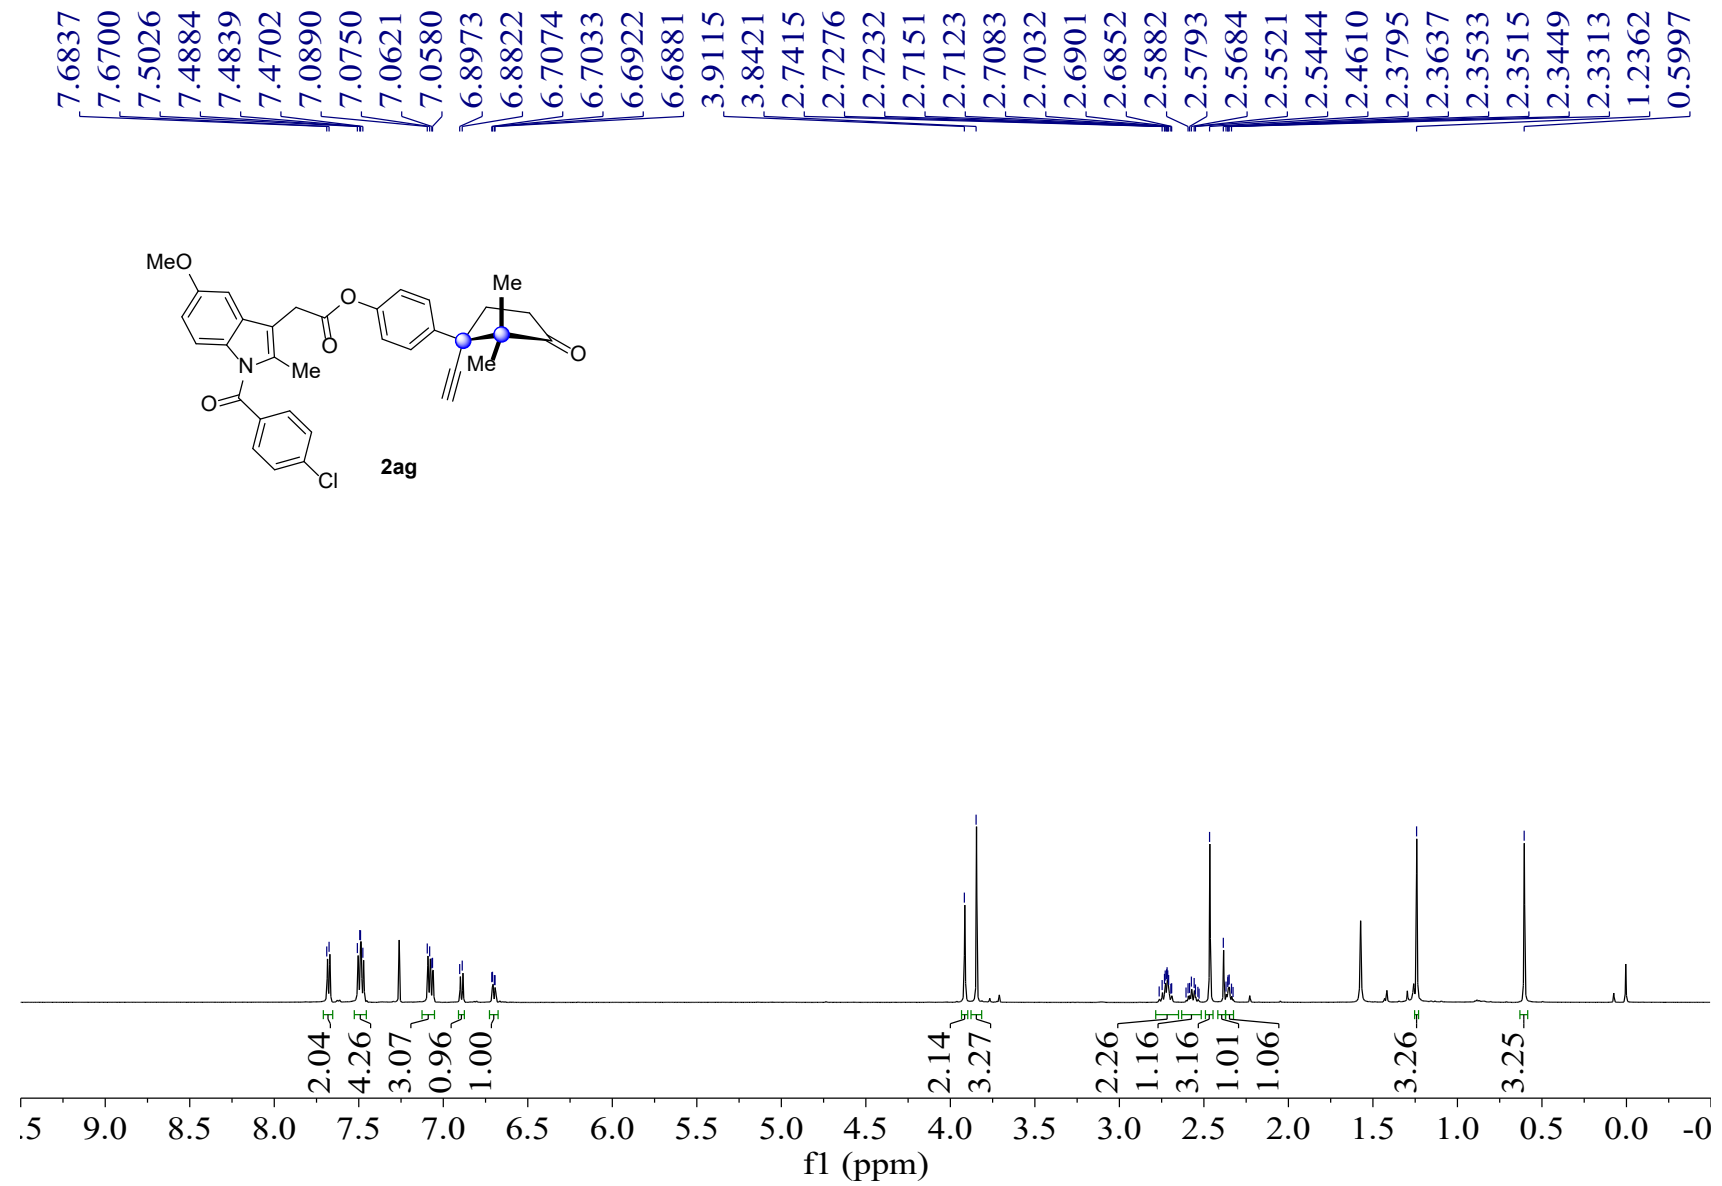

<sup>1</sup>H NMR spectrum of compound **2ag**



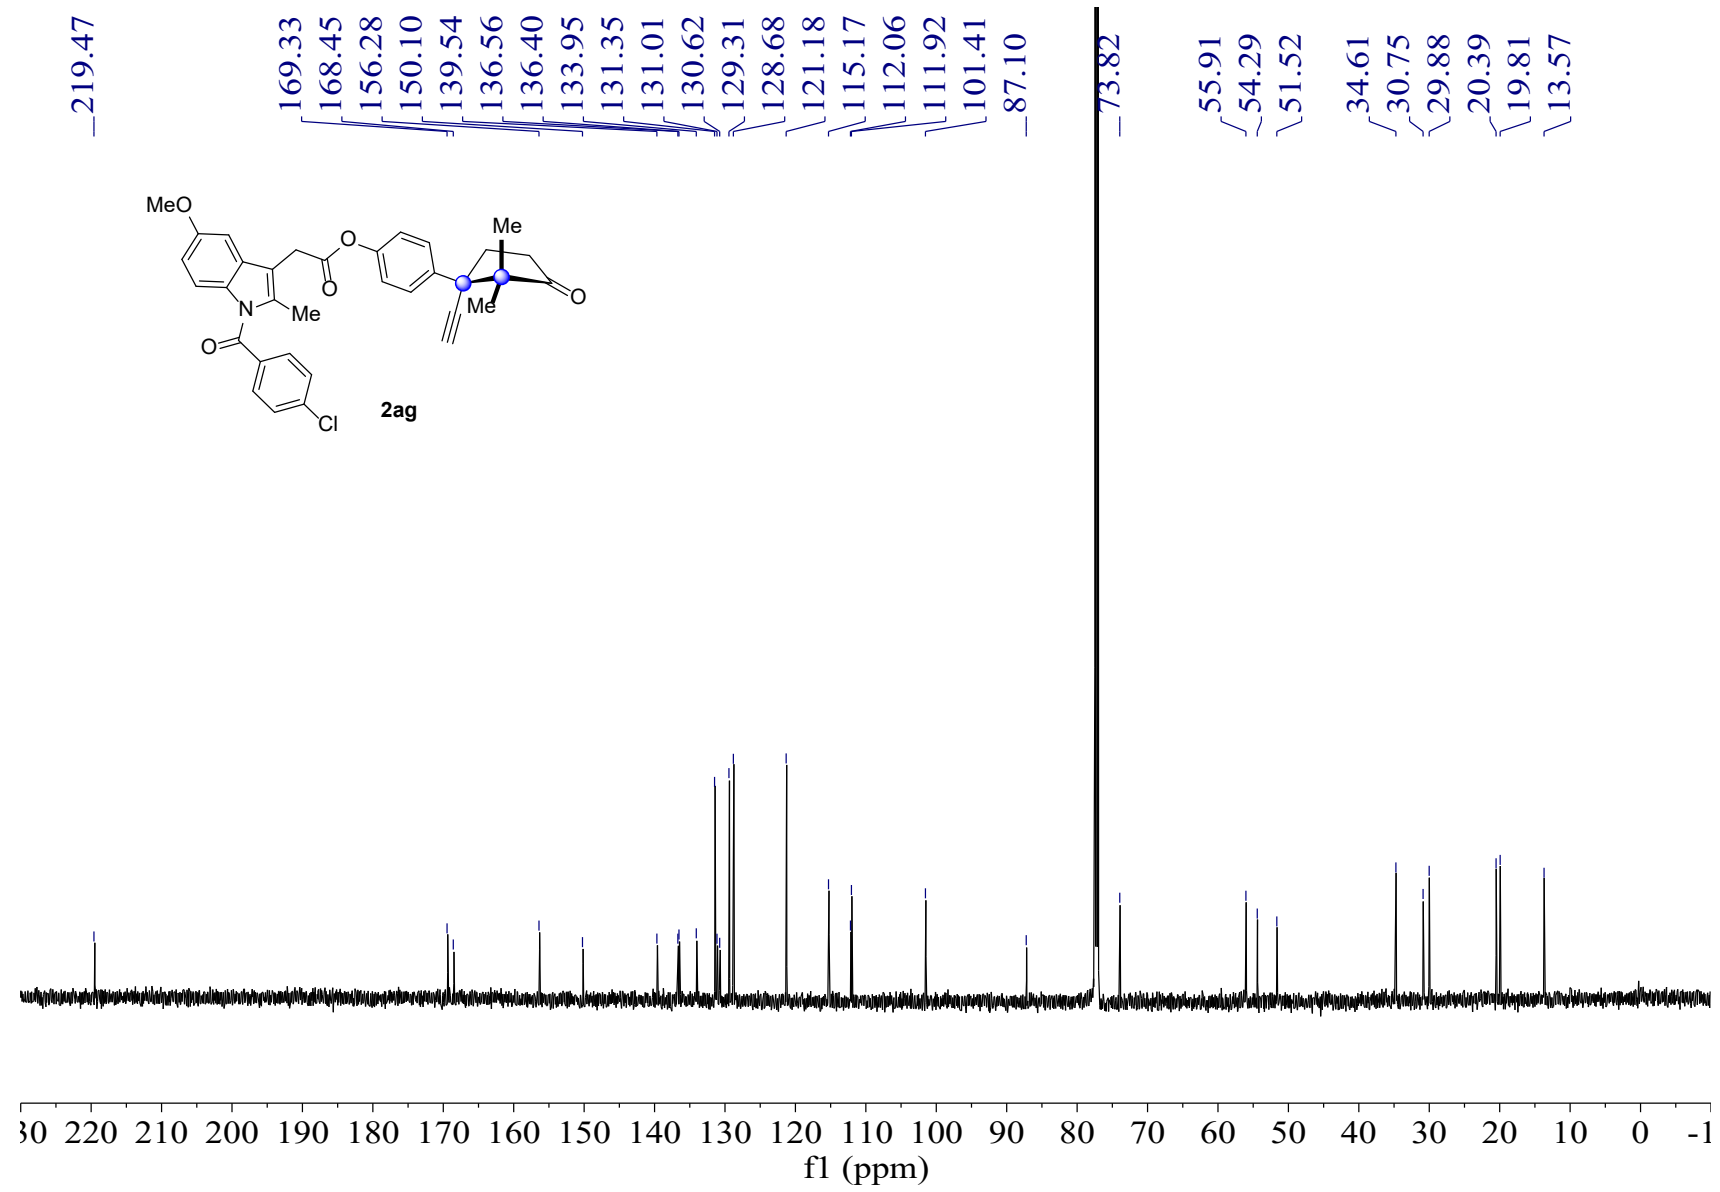

<sup>13</sup>C NMR spectrum of compound **2ag**

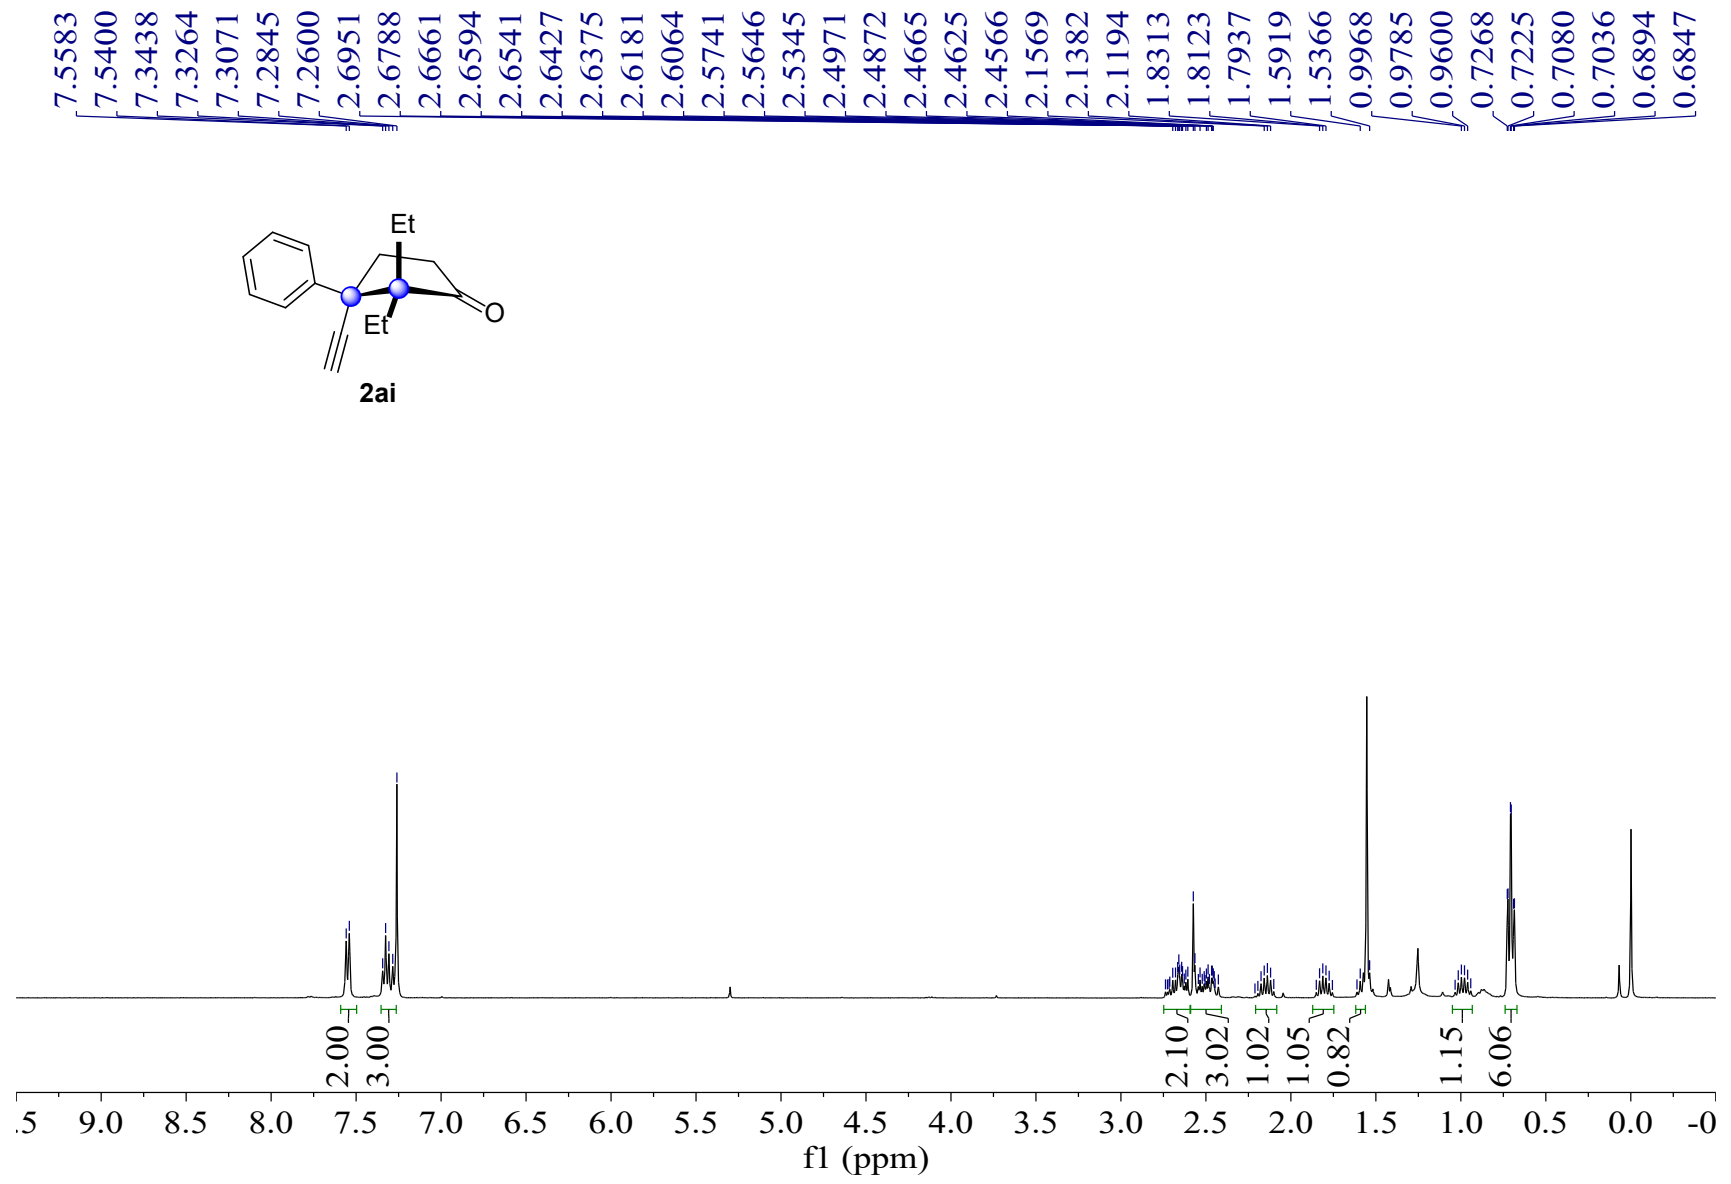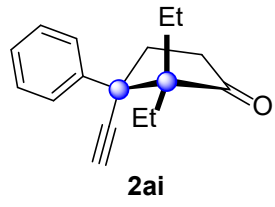

<sup>1</sup>H NMR spectrum of compound **2ai**

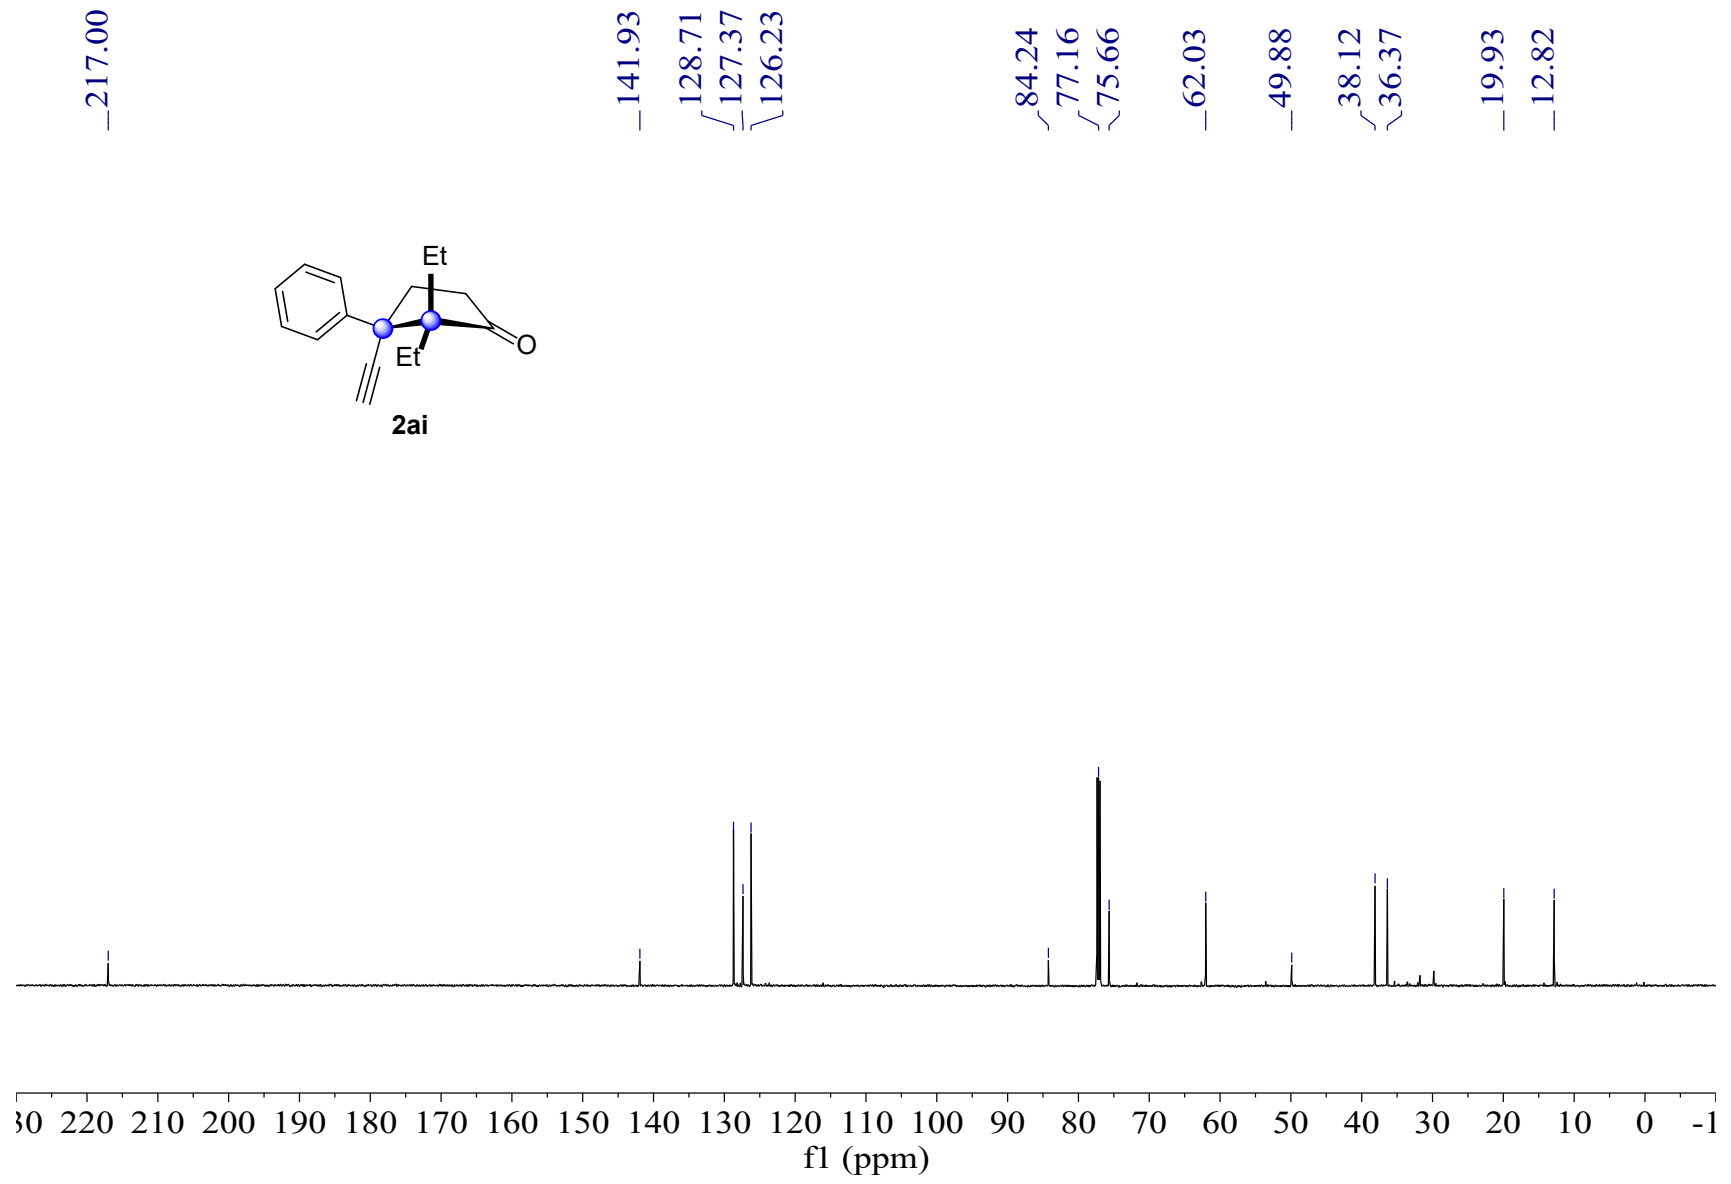

<sup>13</sup>C NMR spectrum of compound **2ai**

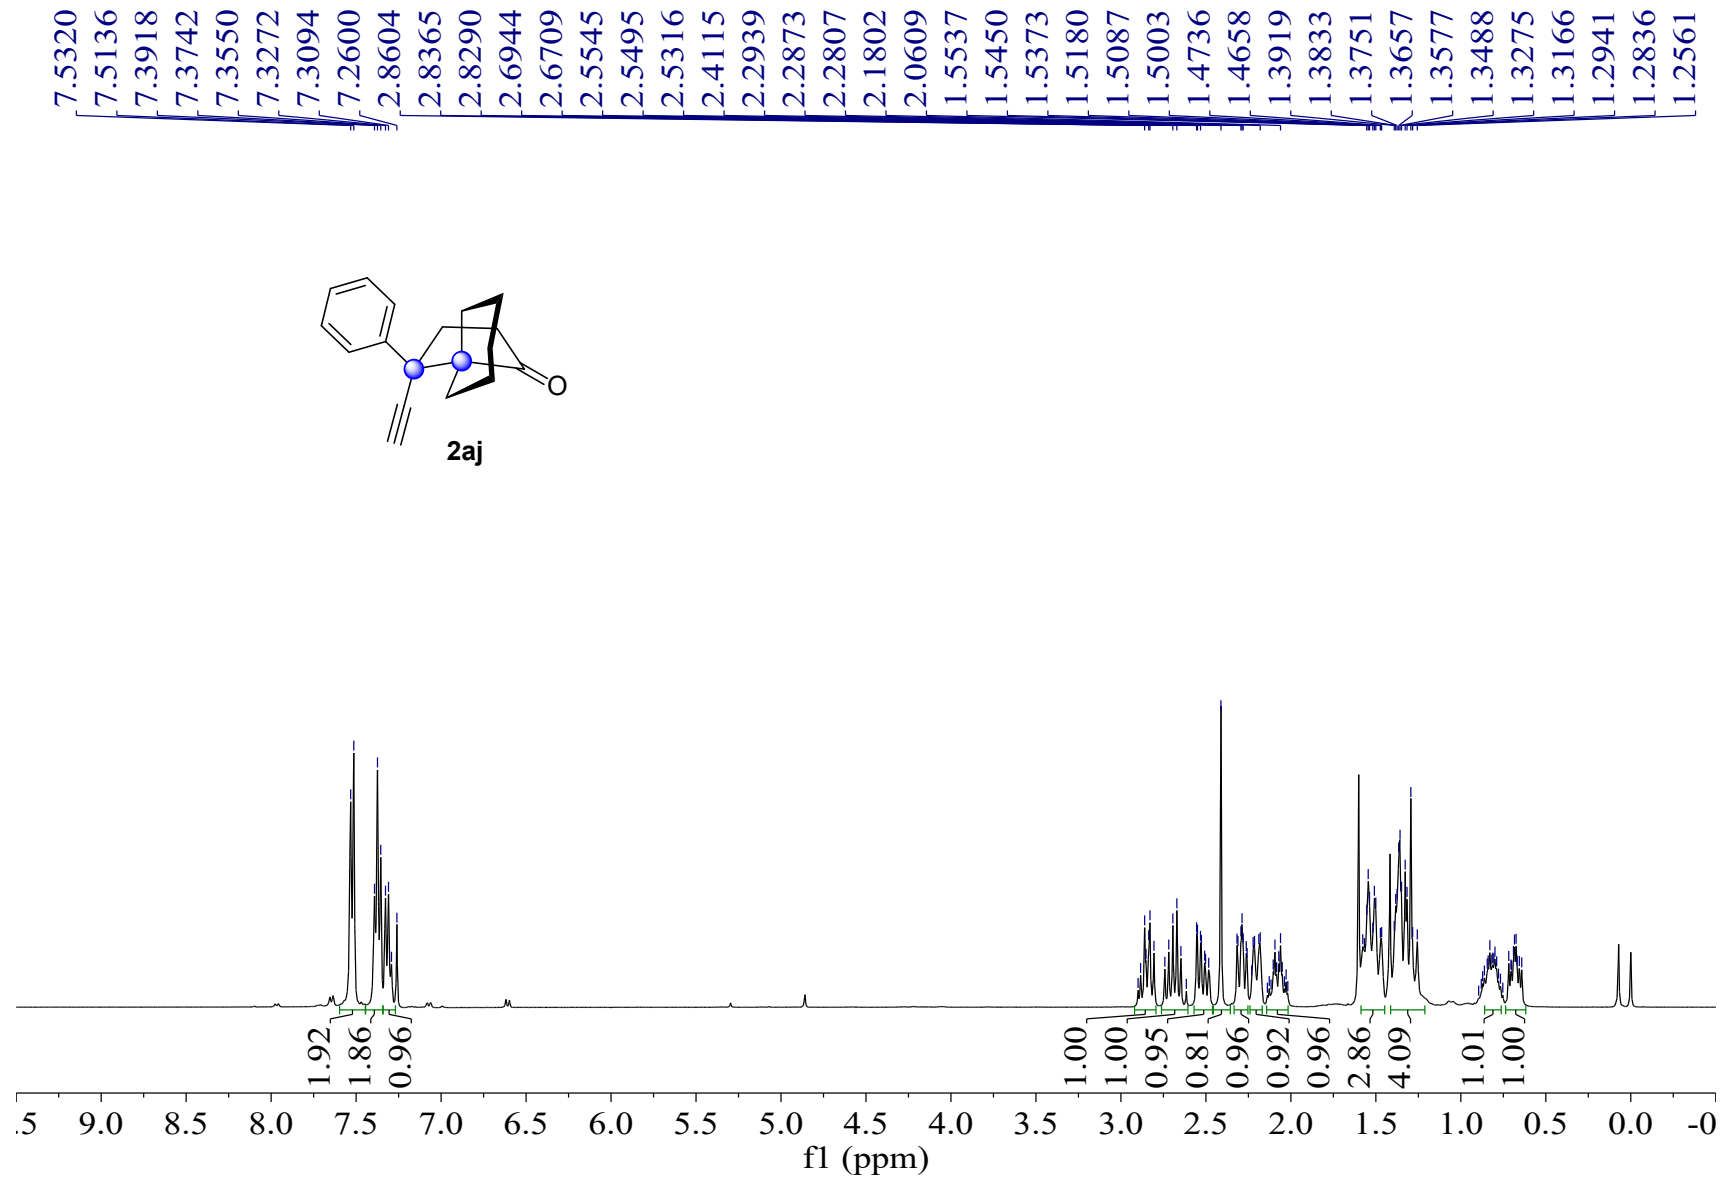

<sup>1</sup>H NMR spectrum of compound **2aj**

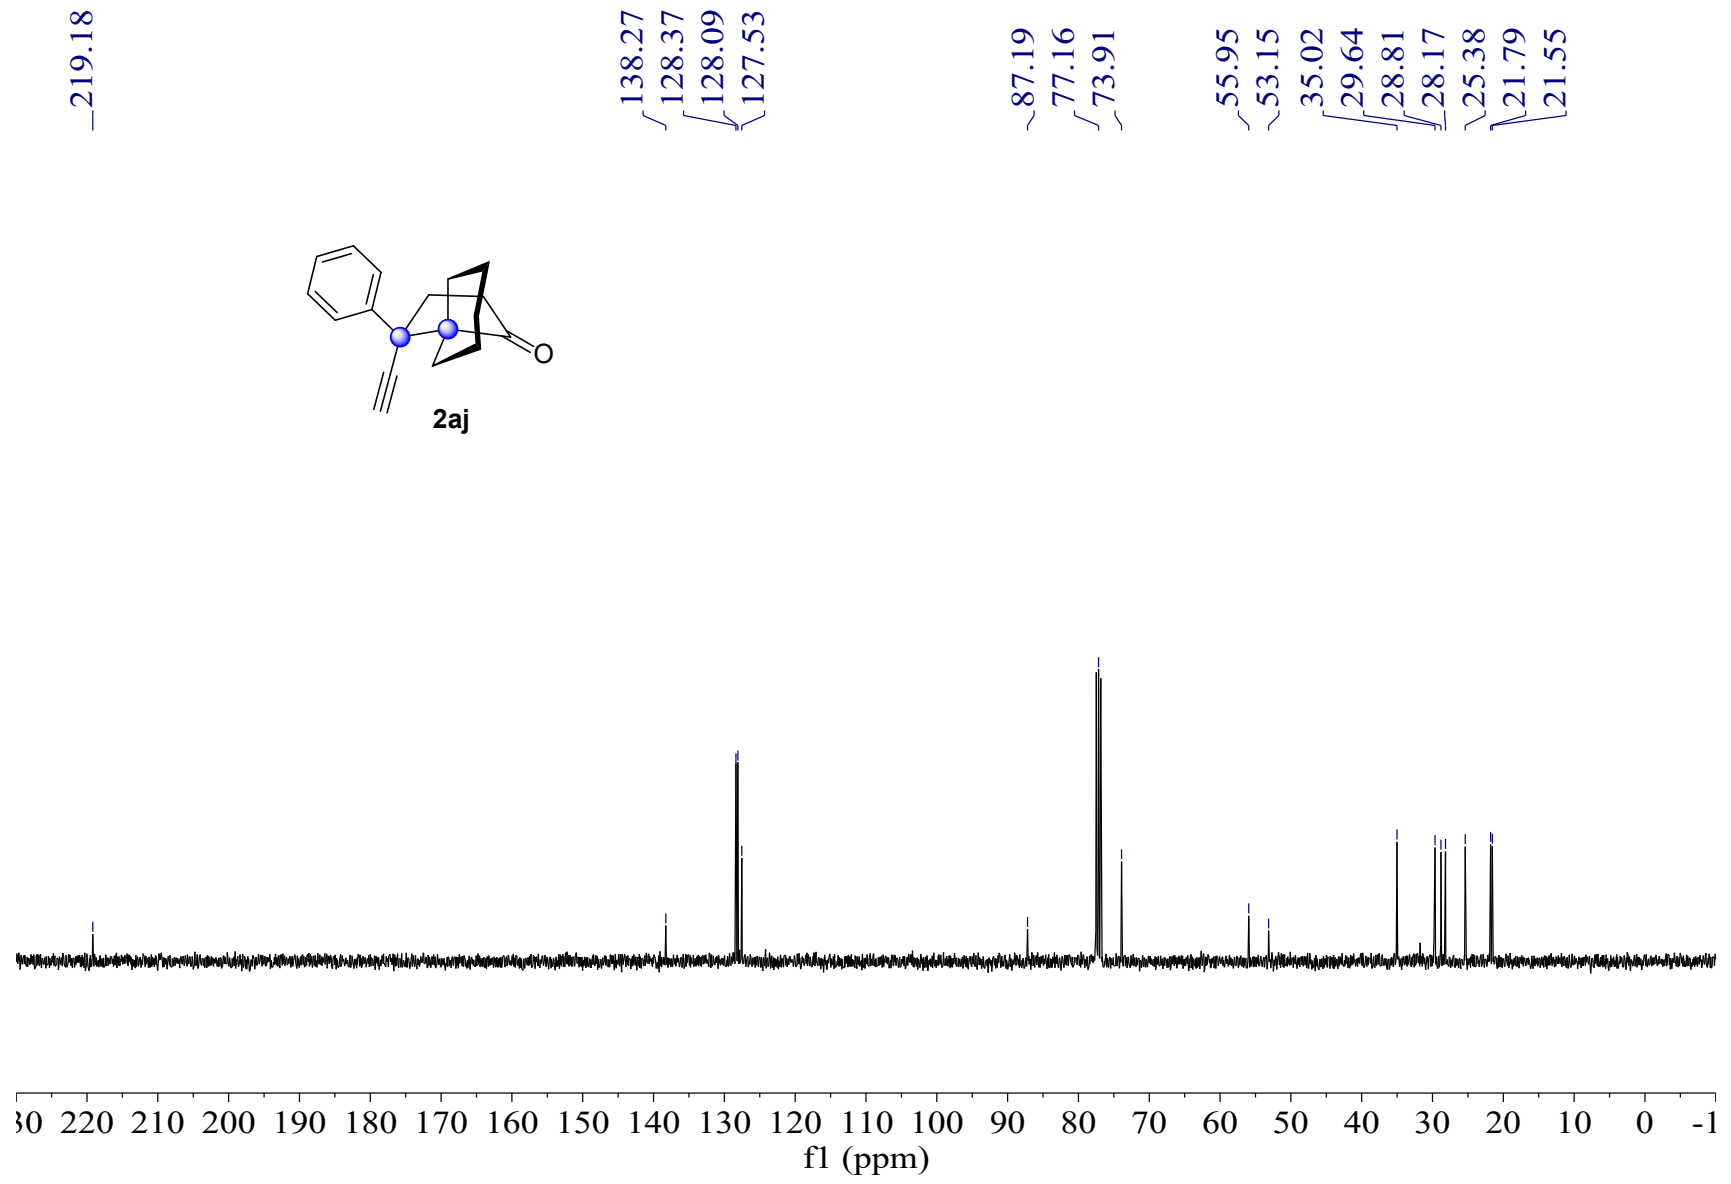

<sup>13</sup>C NMR spectrum of compound **2aj**

7.5235  
 7.5109  
 7.4004  
 7.3877  
 7.3749  
 7.3123  
 7.2999  
 7.2875  
 2.8755  
 2.8462  
 2.7235  
 2.7034  
 2.6943  
 2.6865  
 2.6724  
 2.6562  
 2.6363  
 2.6323  
 2.6161  
 2.6118  
 2.6015  
 2.5976  
 2.5938  
 2.4682  
 2.4642  
 2.4529  
 2.4365  
 2.4224  
 2.4055  
 2.3696  
 2.3560  
 2.3520  
 2.3495  
 2.3386  
 2.3357  
 2.3323  
 2.3181

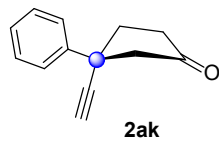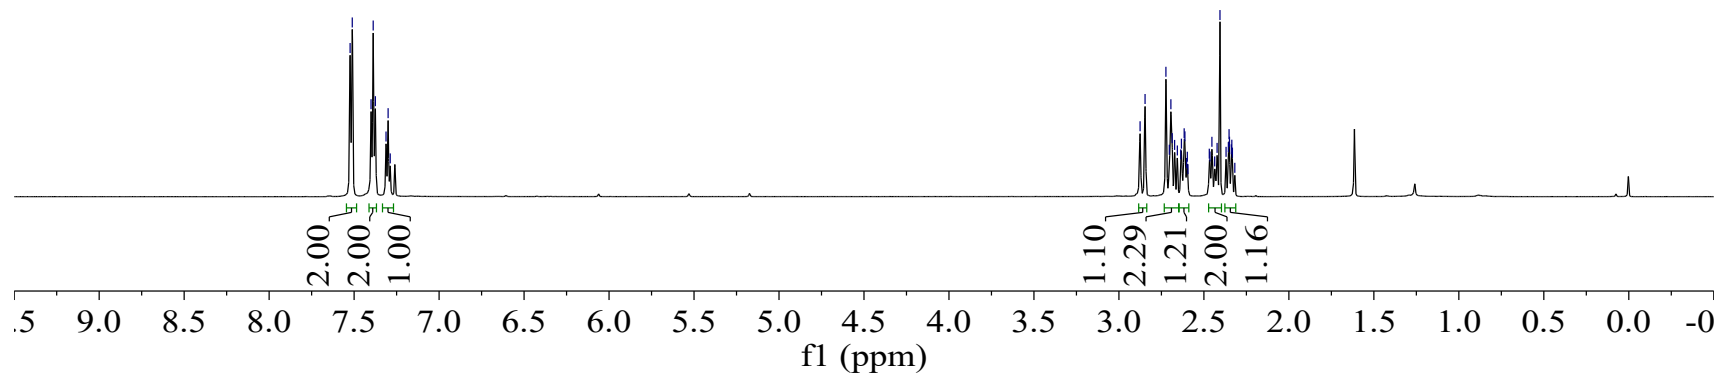

<sup>1</sup>H NMR spectrum of compound **2ak**

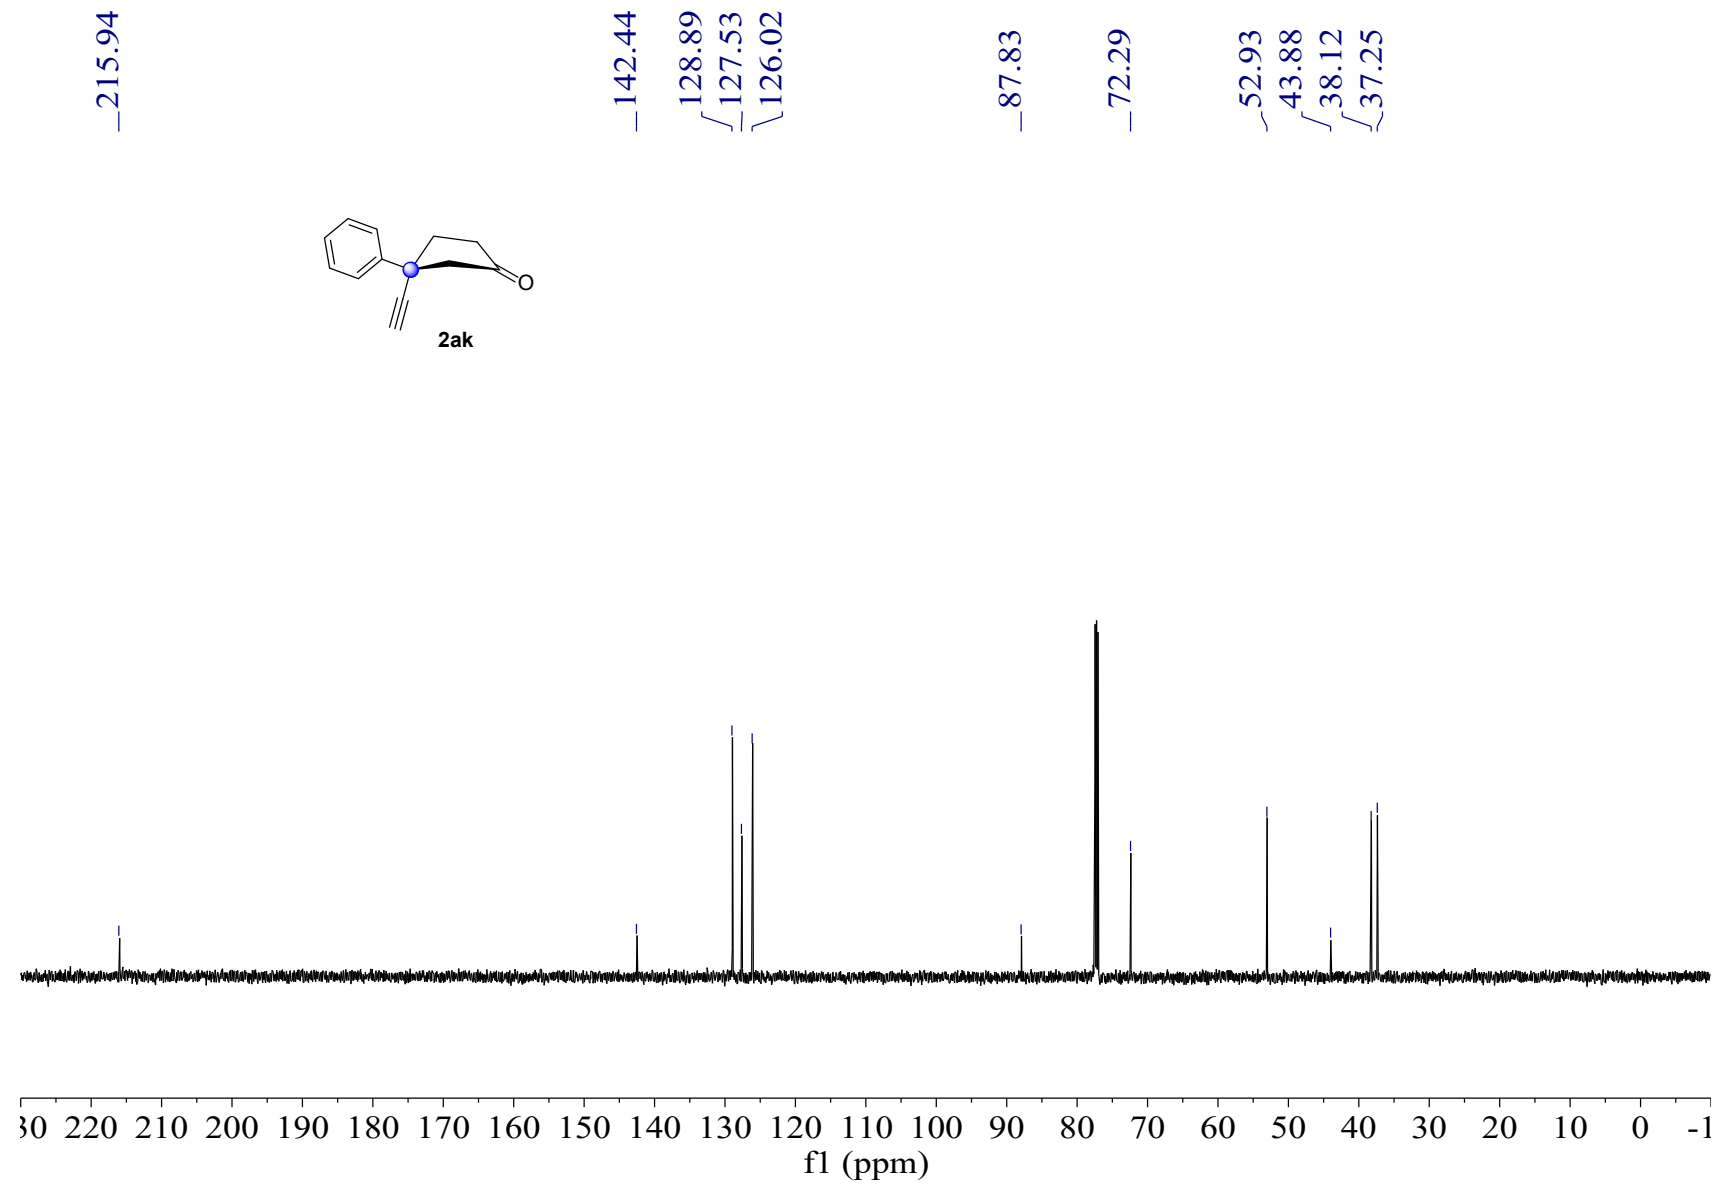

<sup>13</sup>C NMR spectrum of compound **2ak**

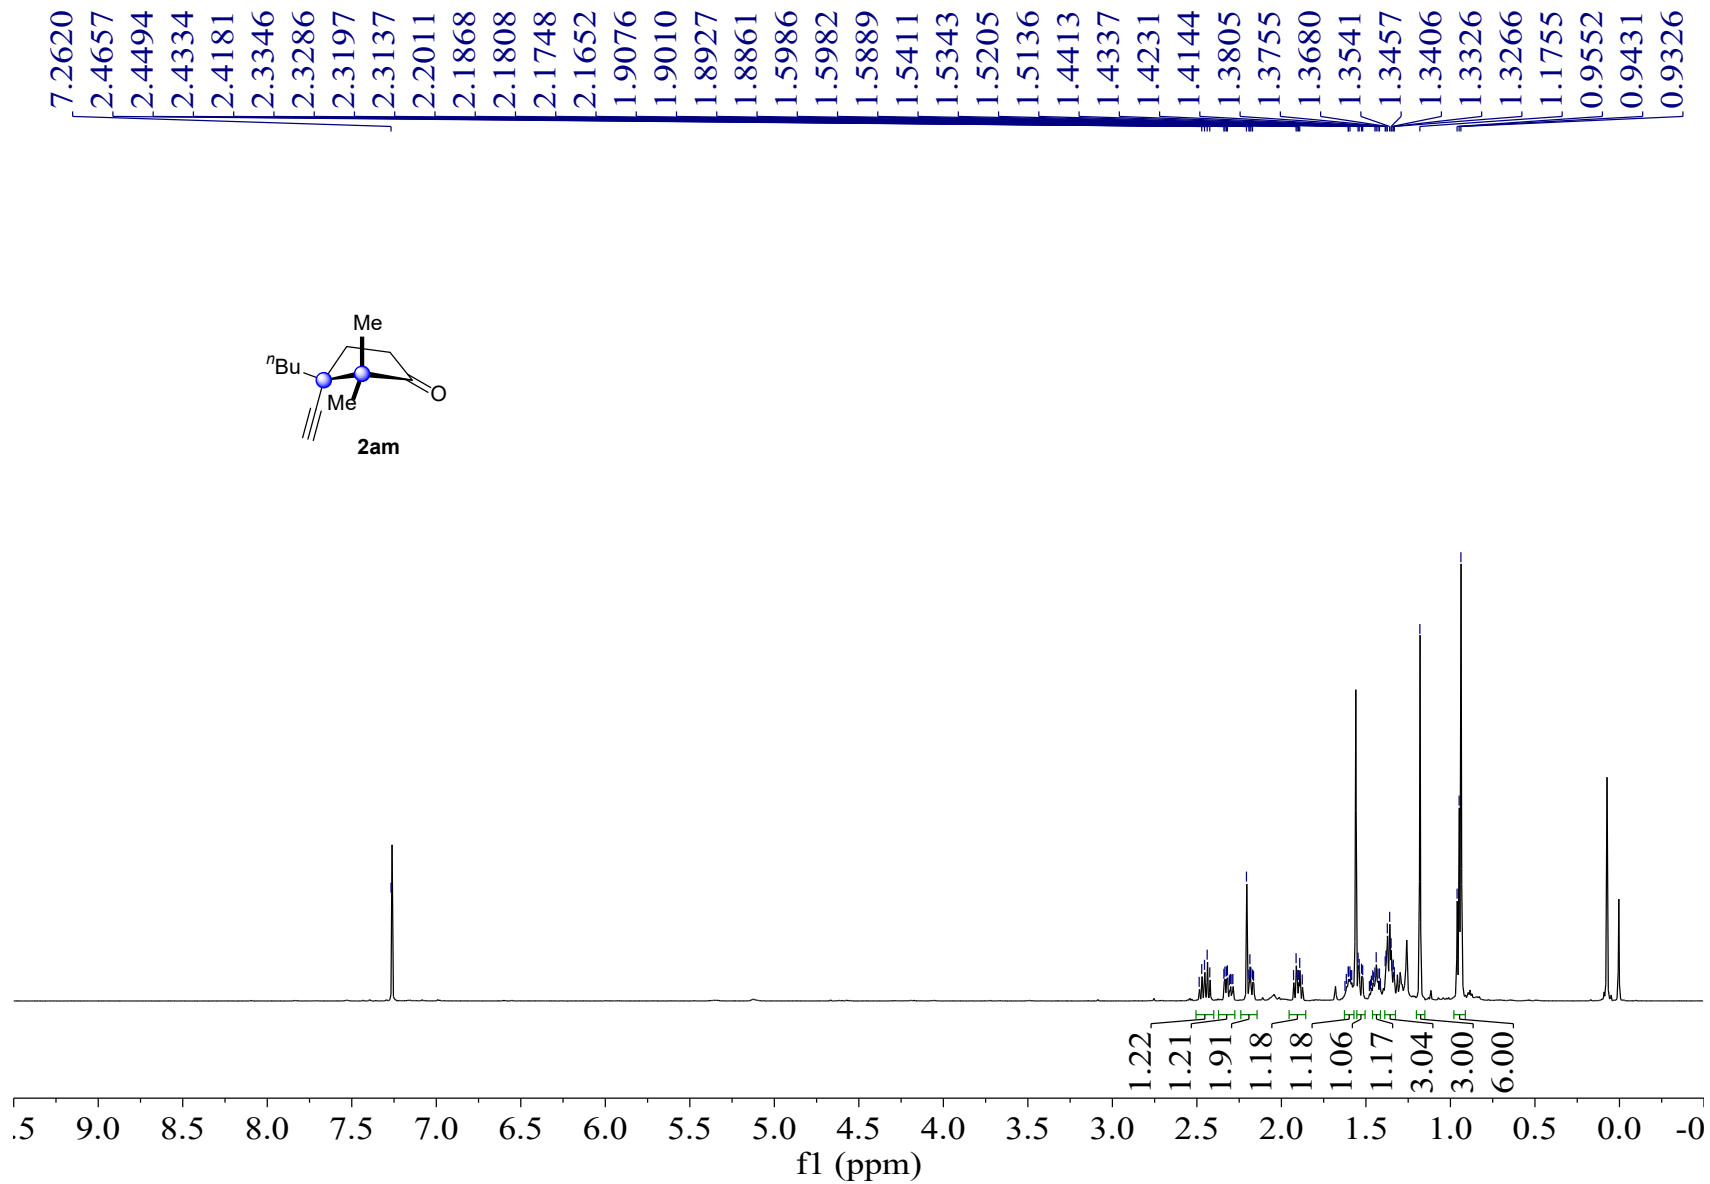

<sup>1</sup>H NMR spectrum of compound **2am**



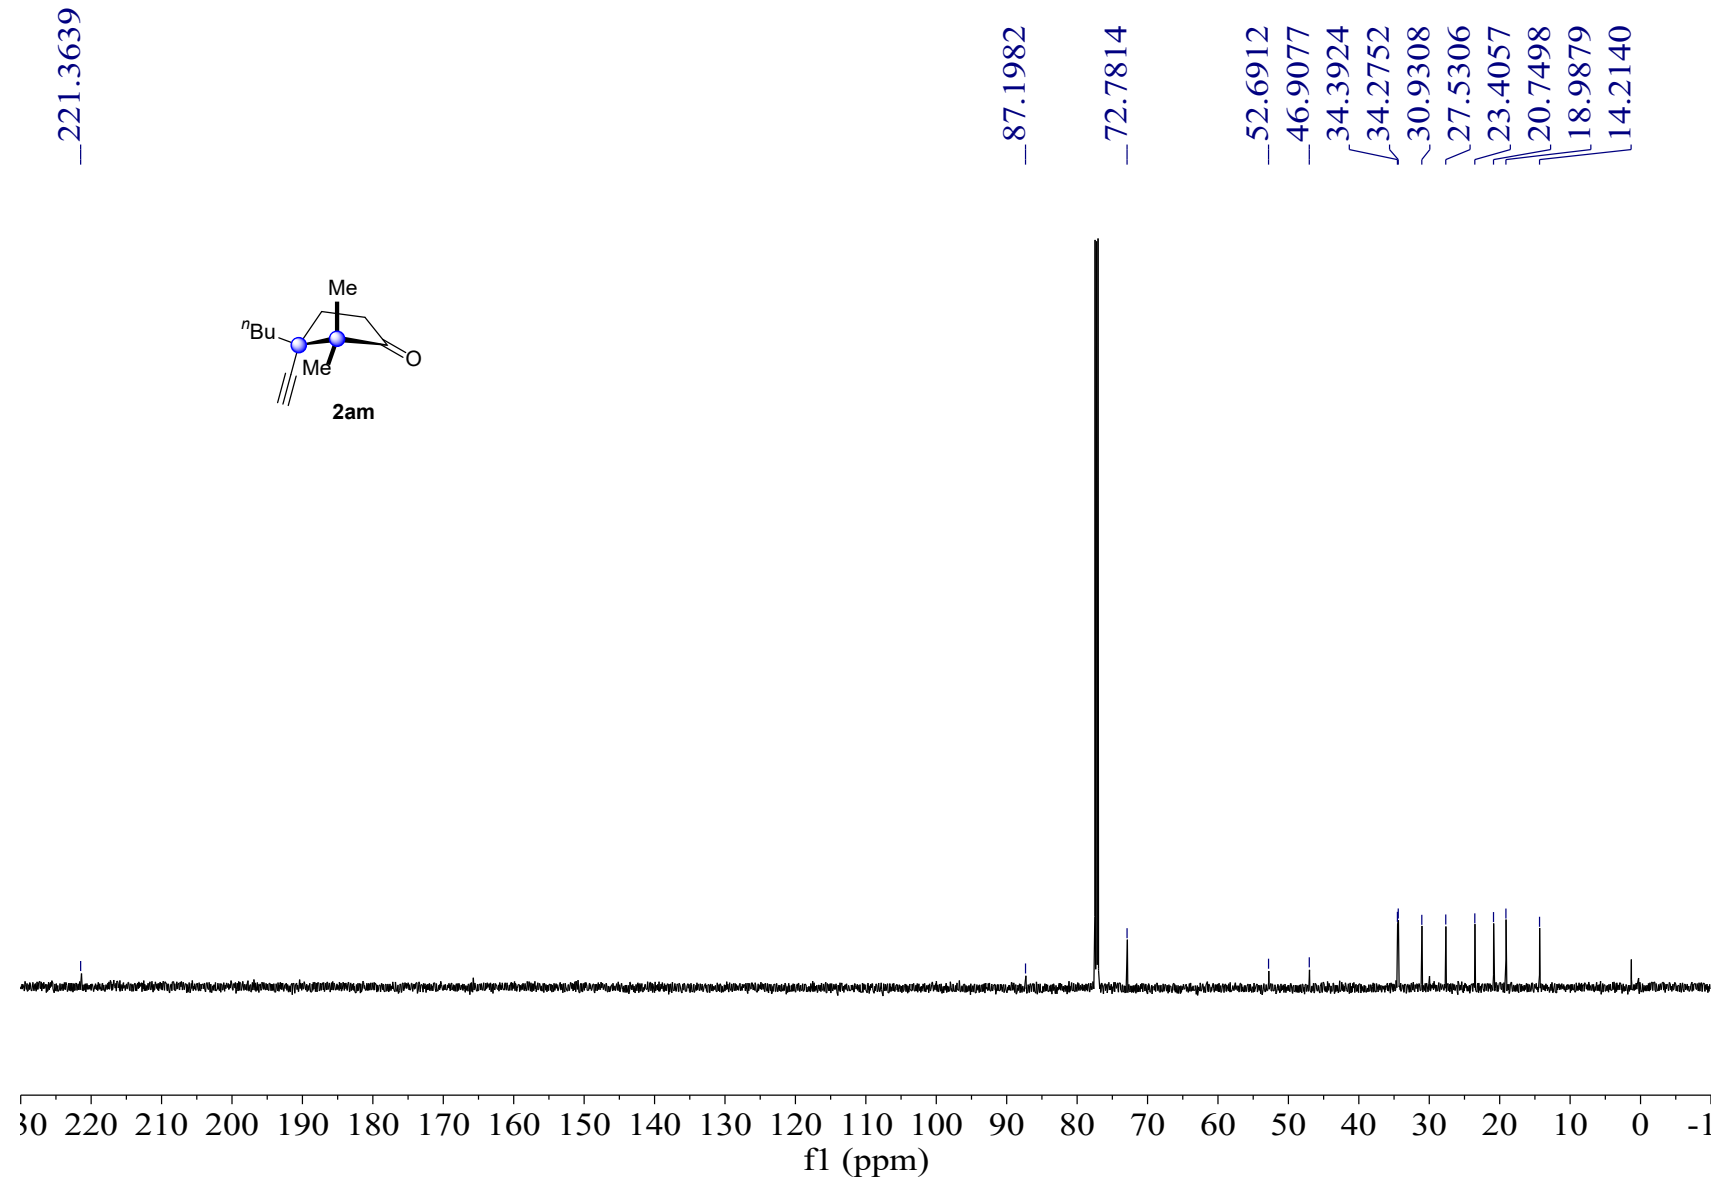

<sup>13</sup>C NMR spectrum of compound **2am**

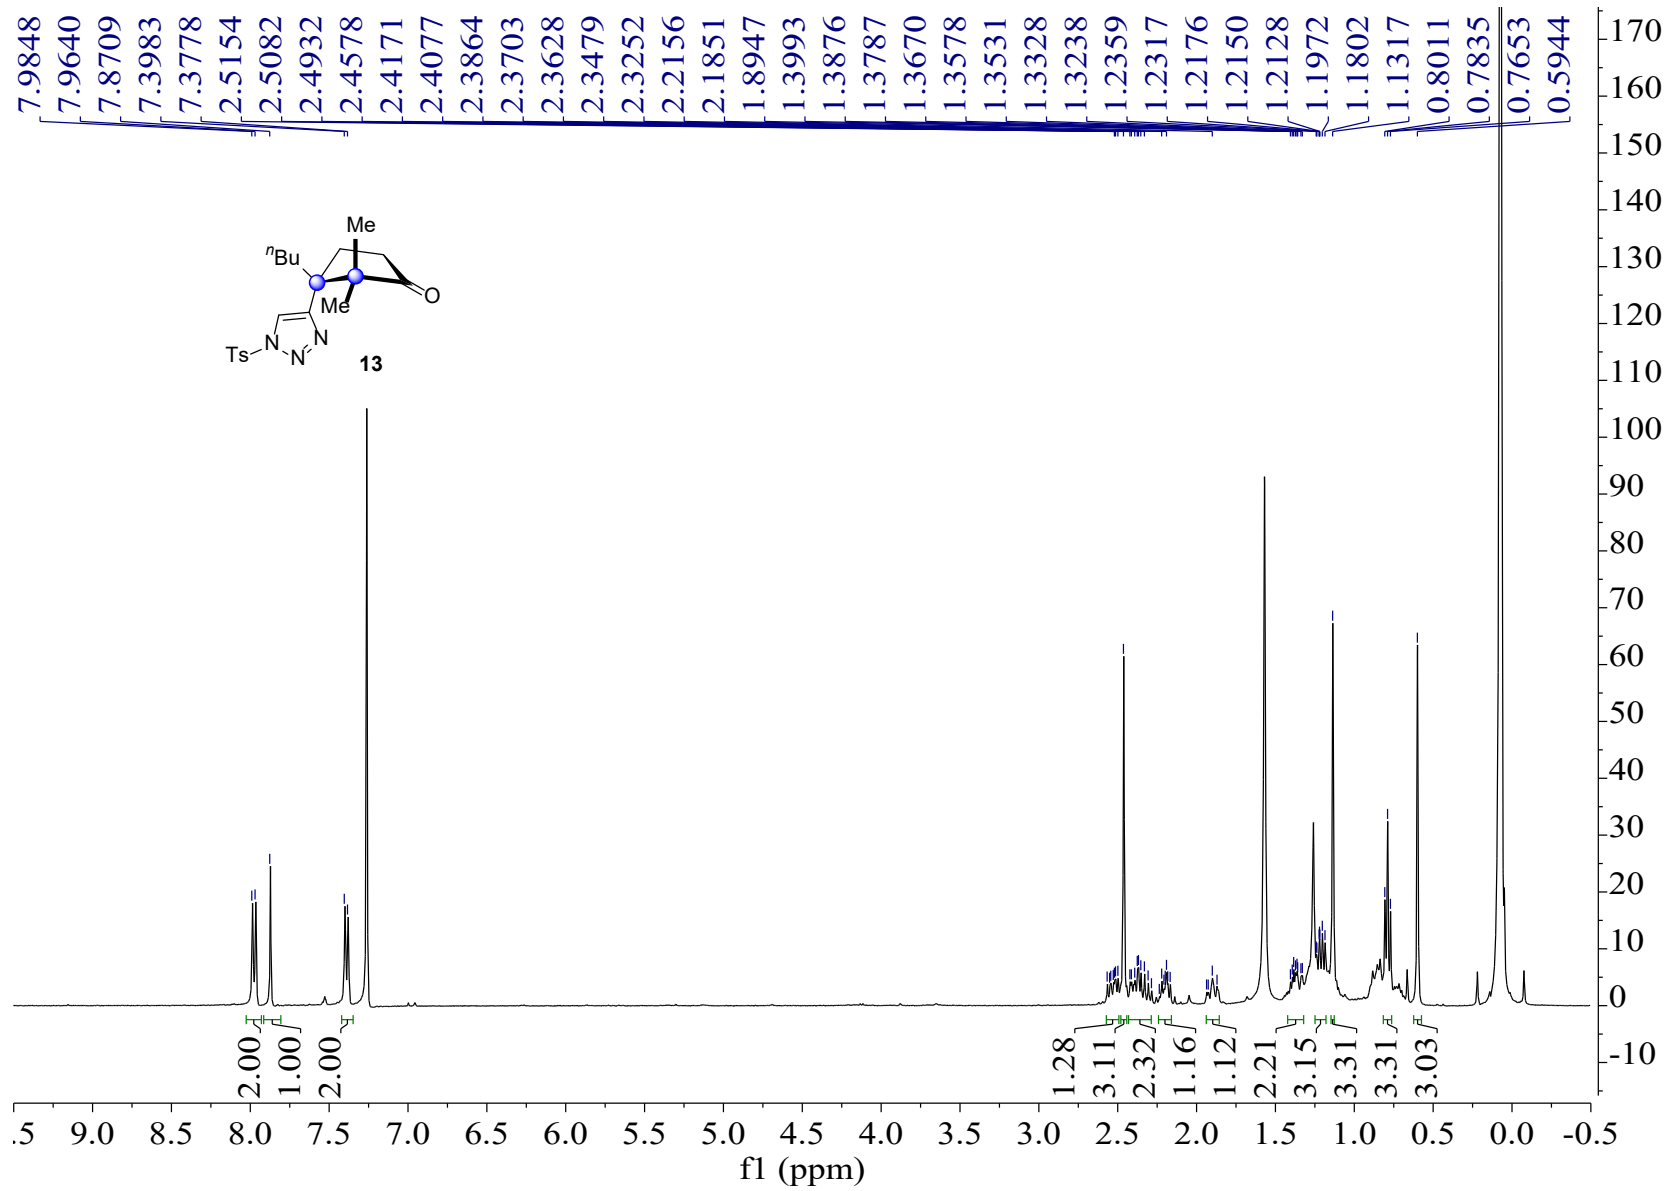

<sup>1</sup>H NMR spectrum of compound **13**

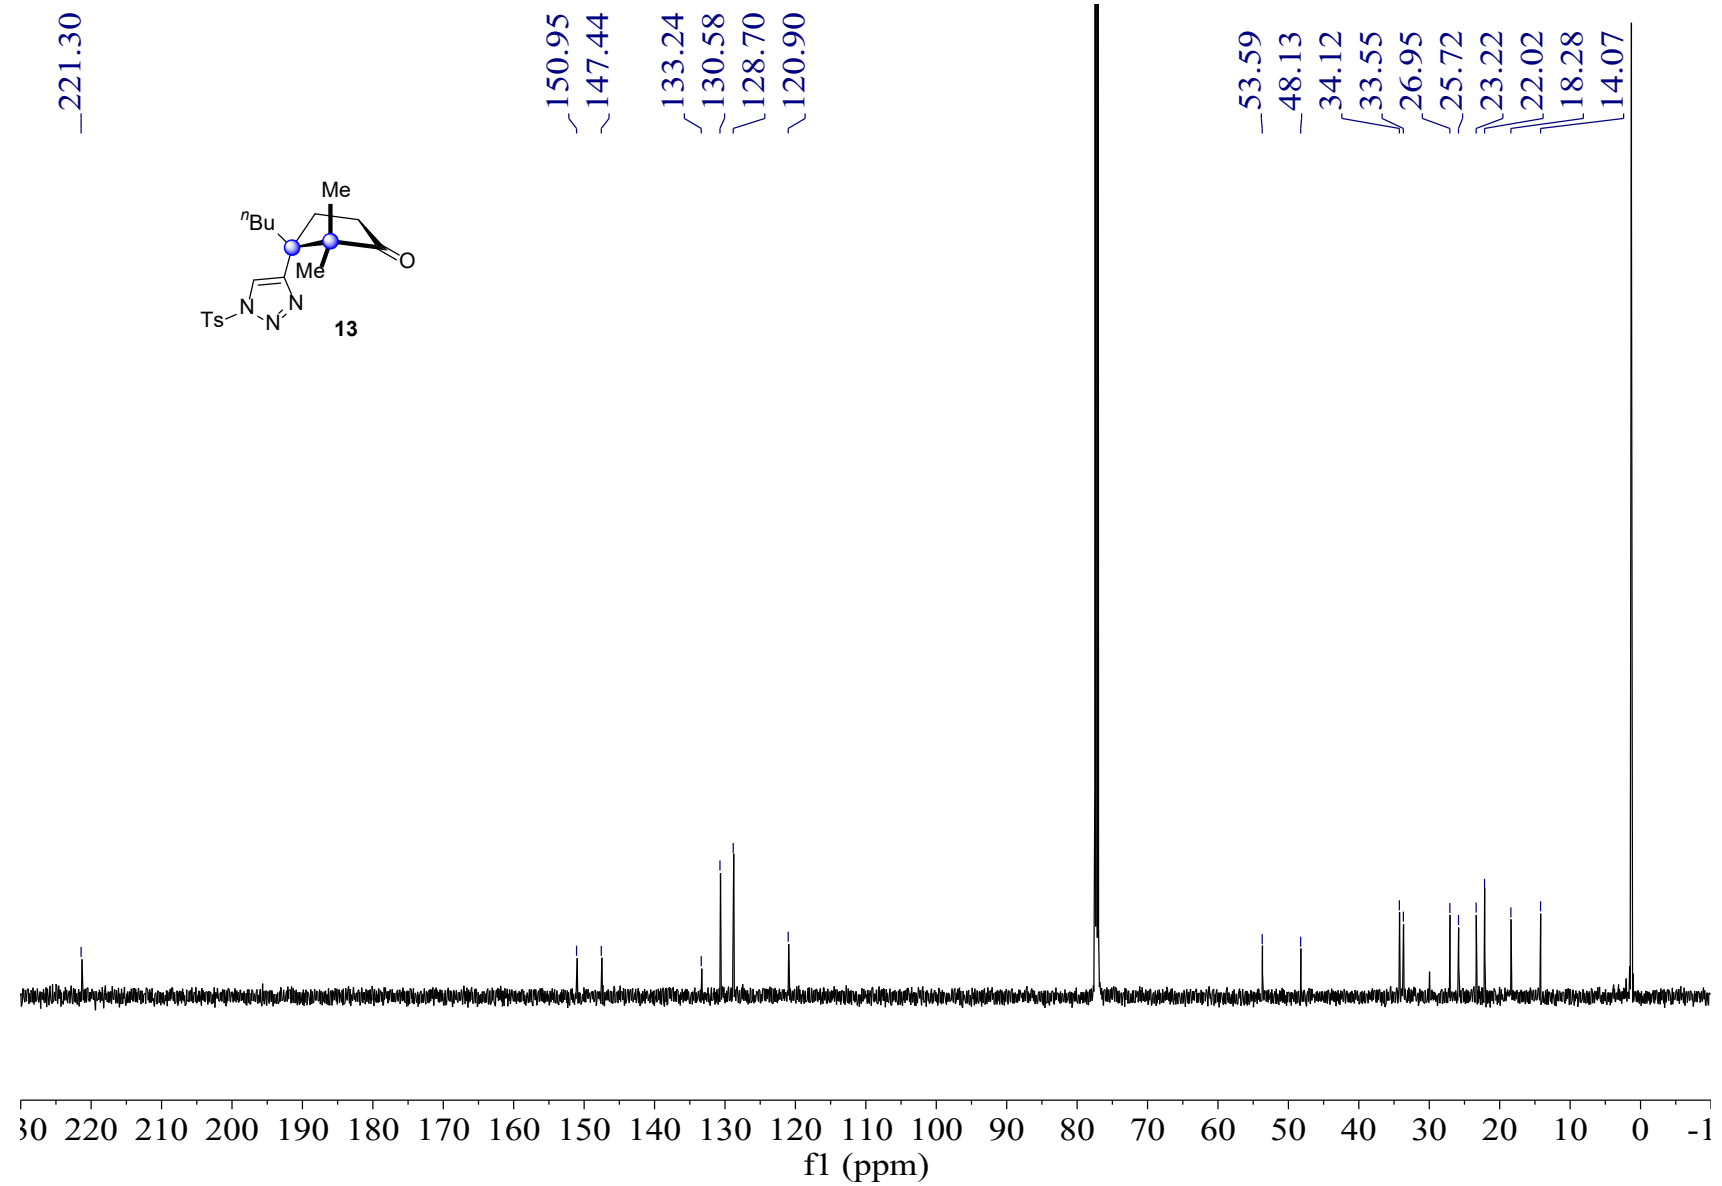

$^{13}\text{C}$  NMR spectrum of compound **13**

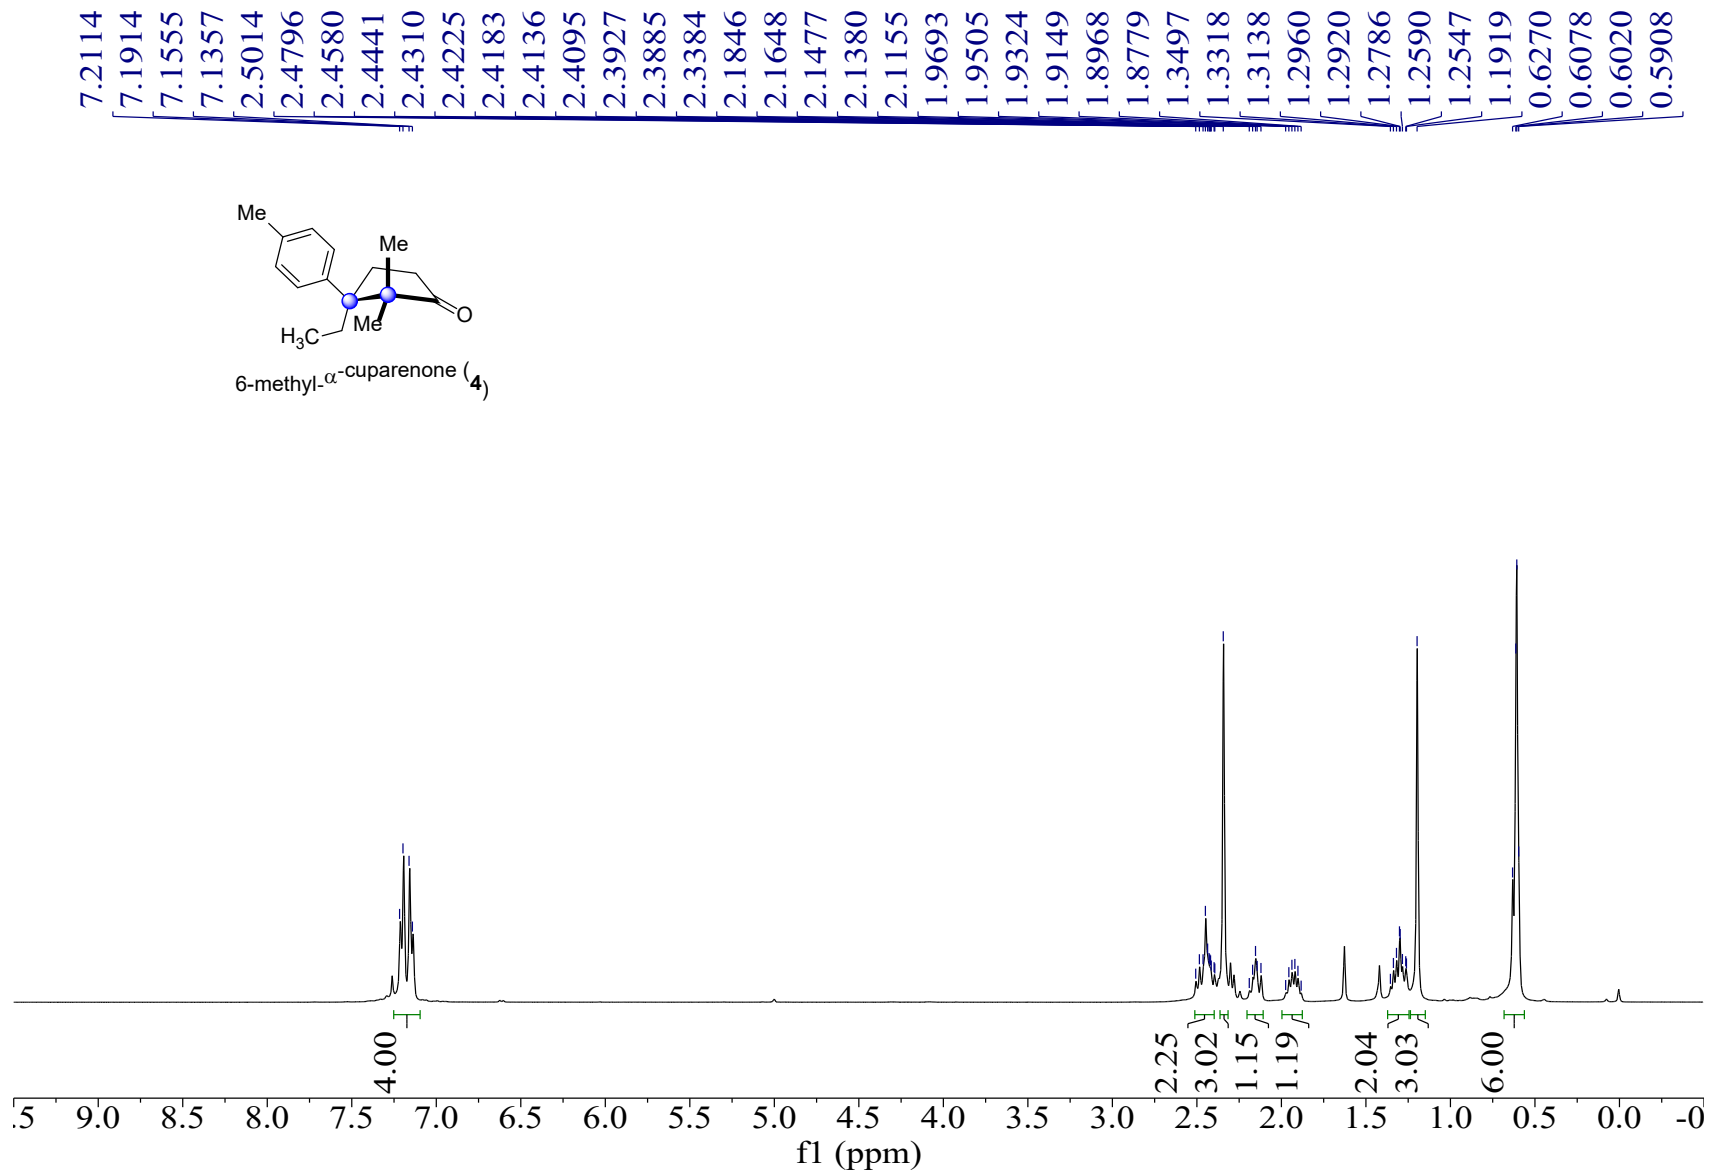

$^1\text{H}$  NMR spectrum of compound 4

-222.89

139.85  
135.77  
129.01  
127.10

54.11  
52.38

33.61  
27.74  
23.78  
22.58  
21.02  
18.24  
9.04

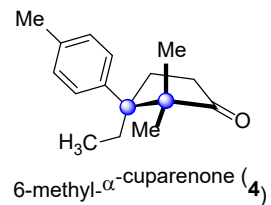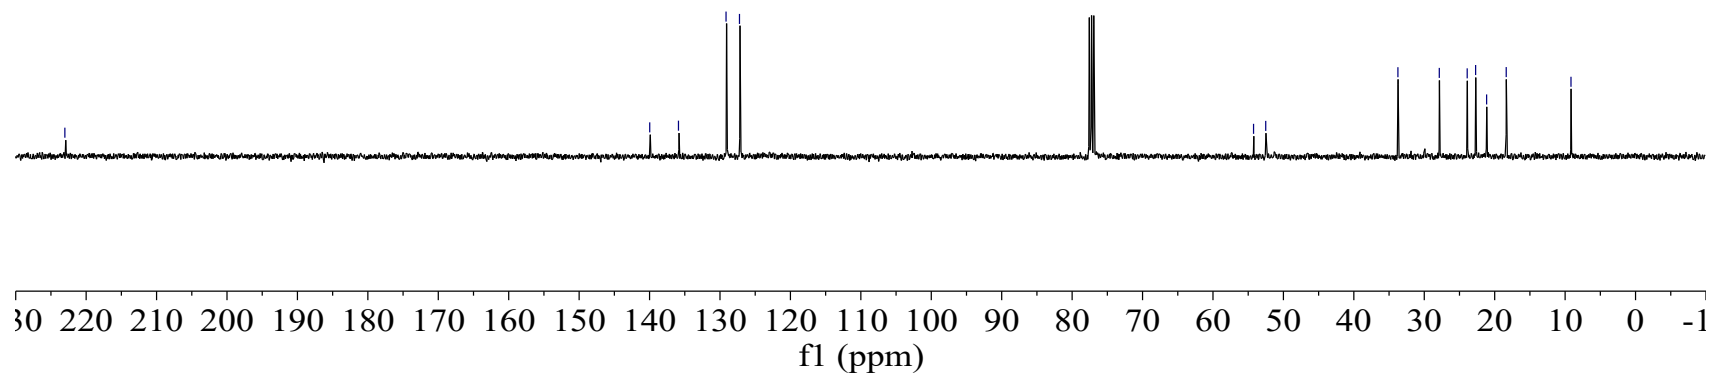

$^{13}\text{C}$  NMR spectrum of compound **4**

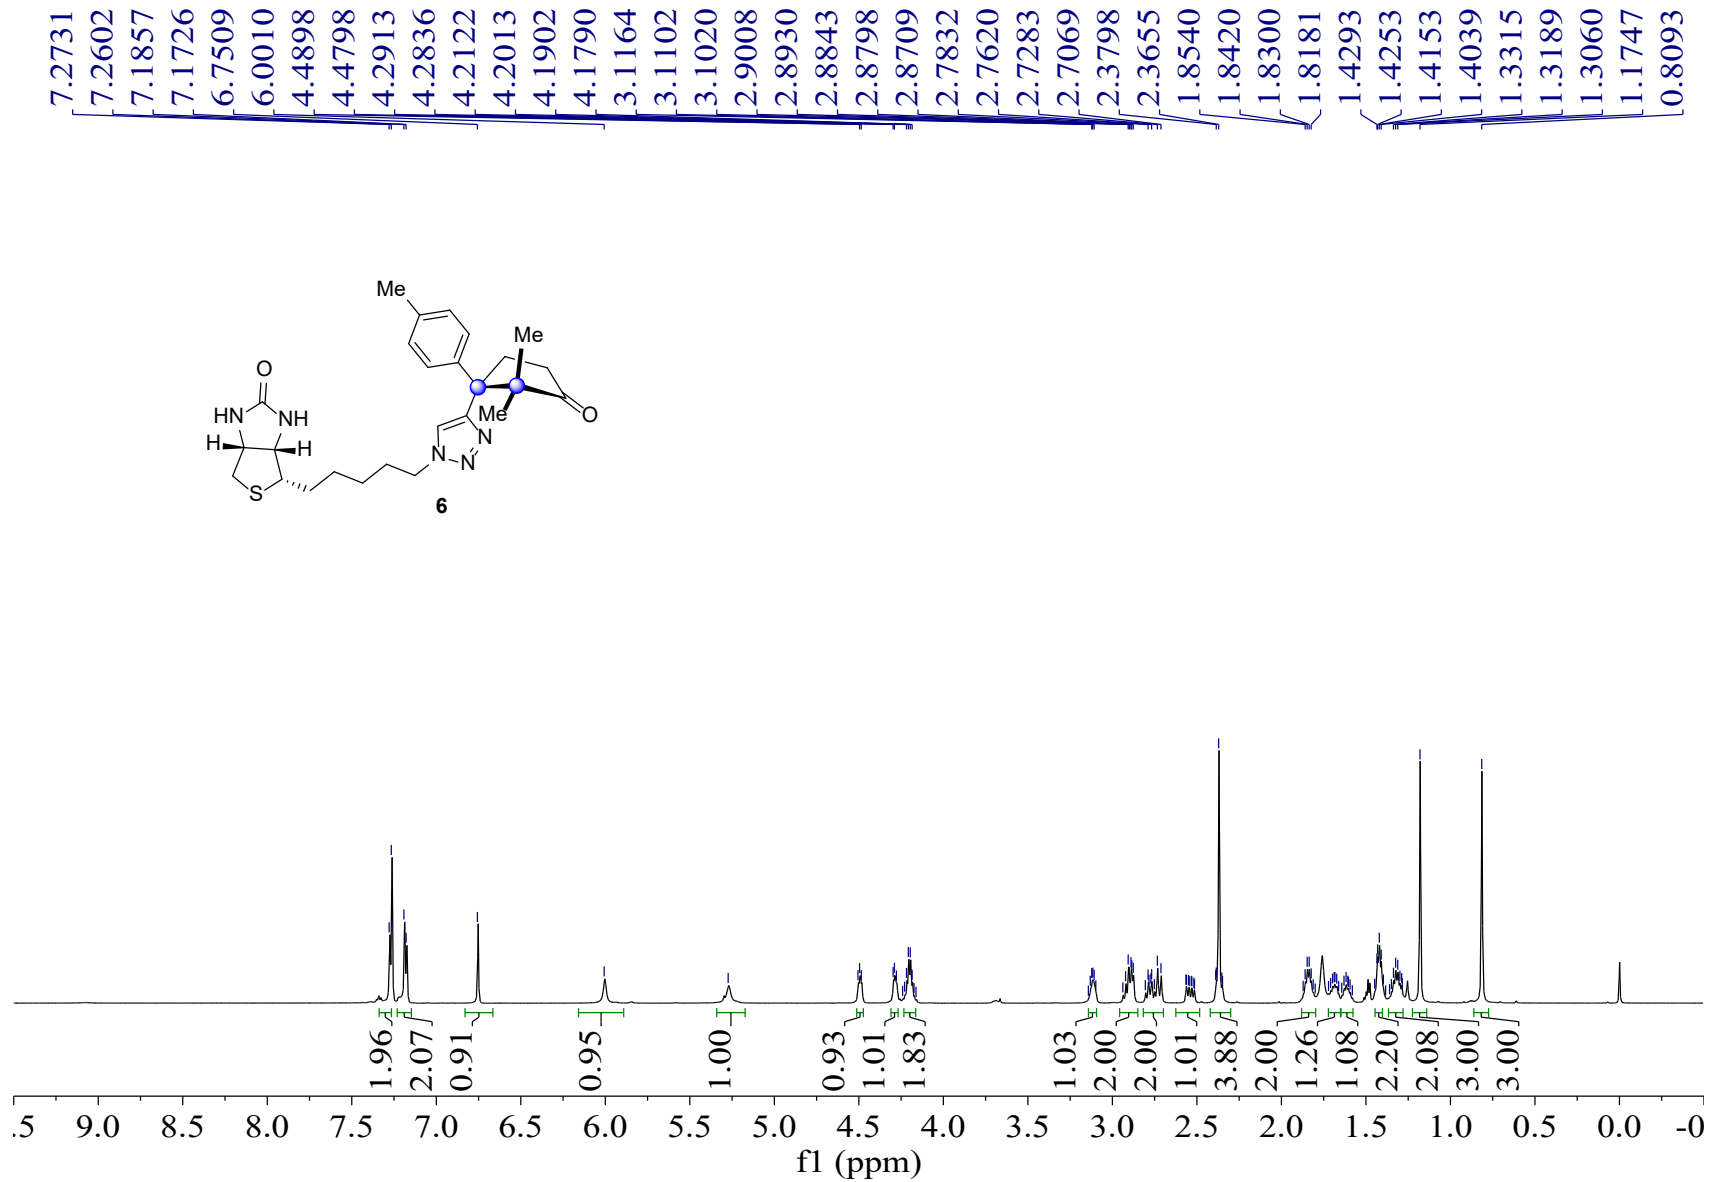

<sup>1</sup>H NMR spectrum of compound 6

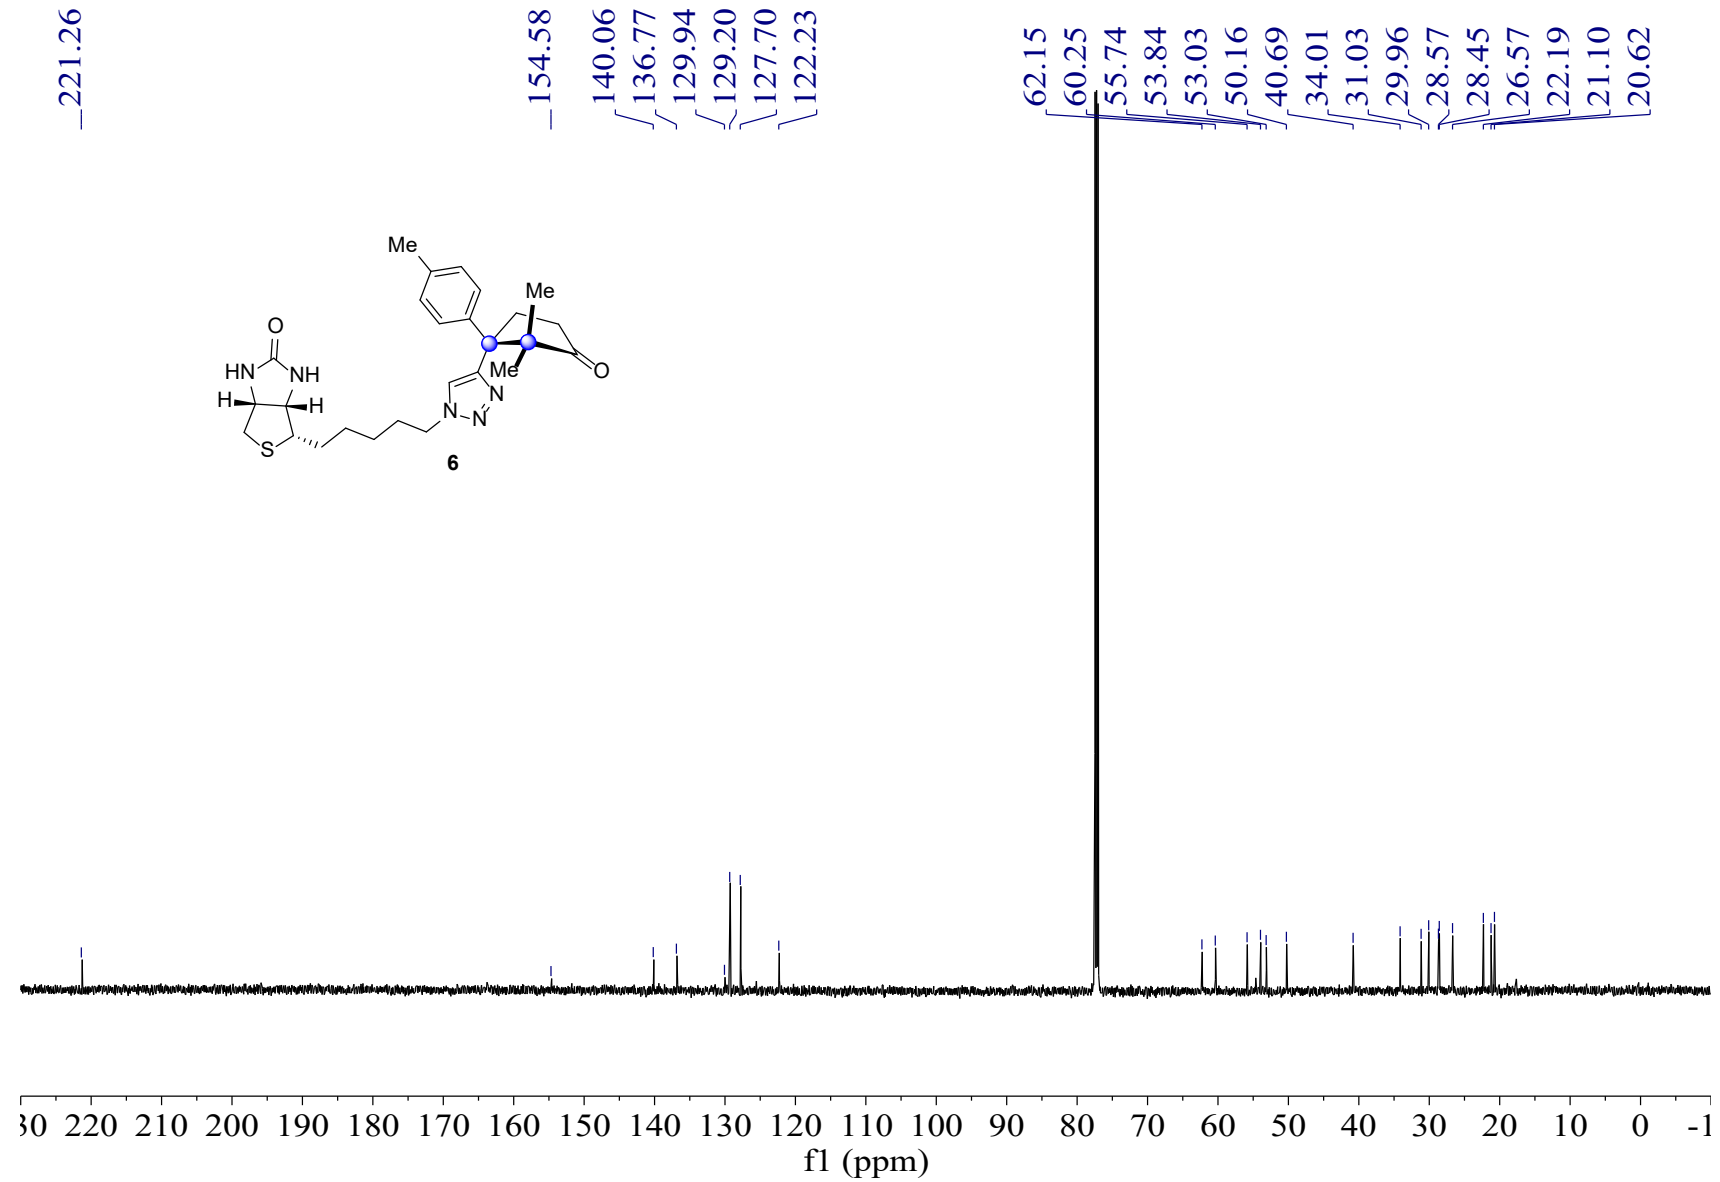

<sup>13</sup>C NMR spectrum of compound 6

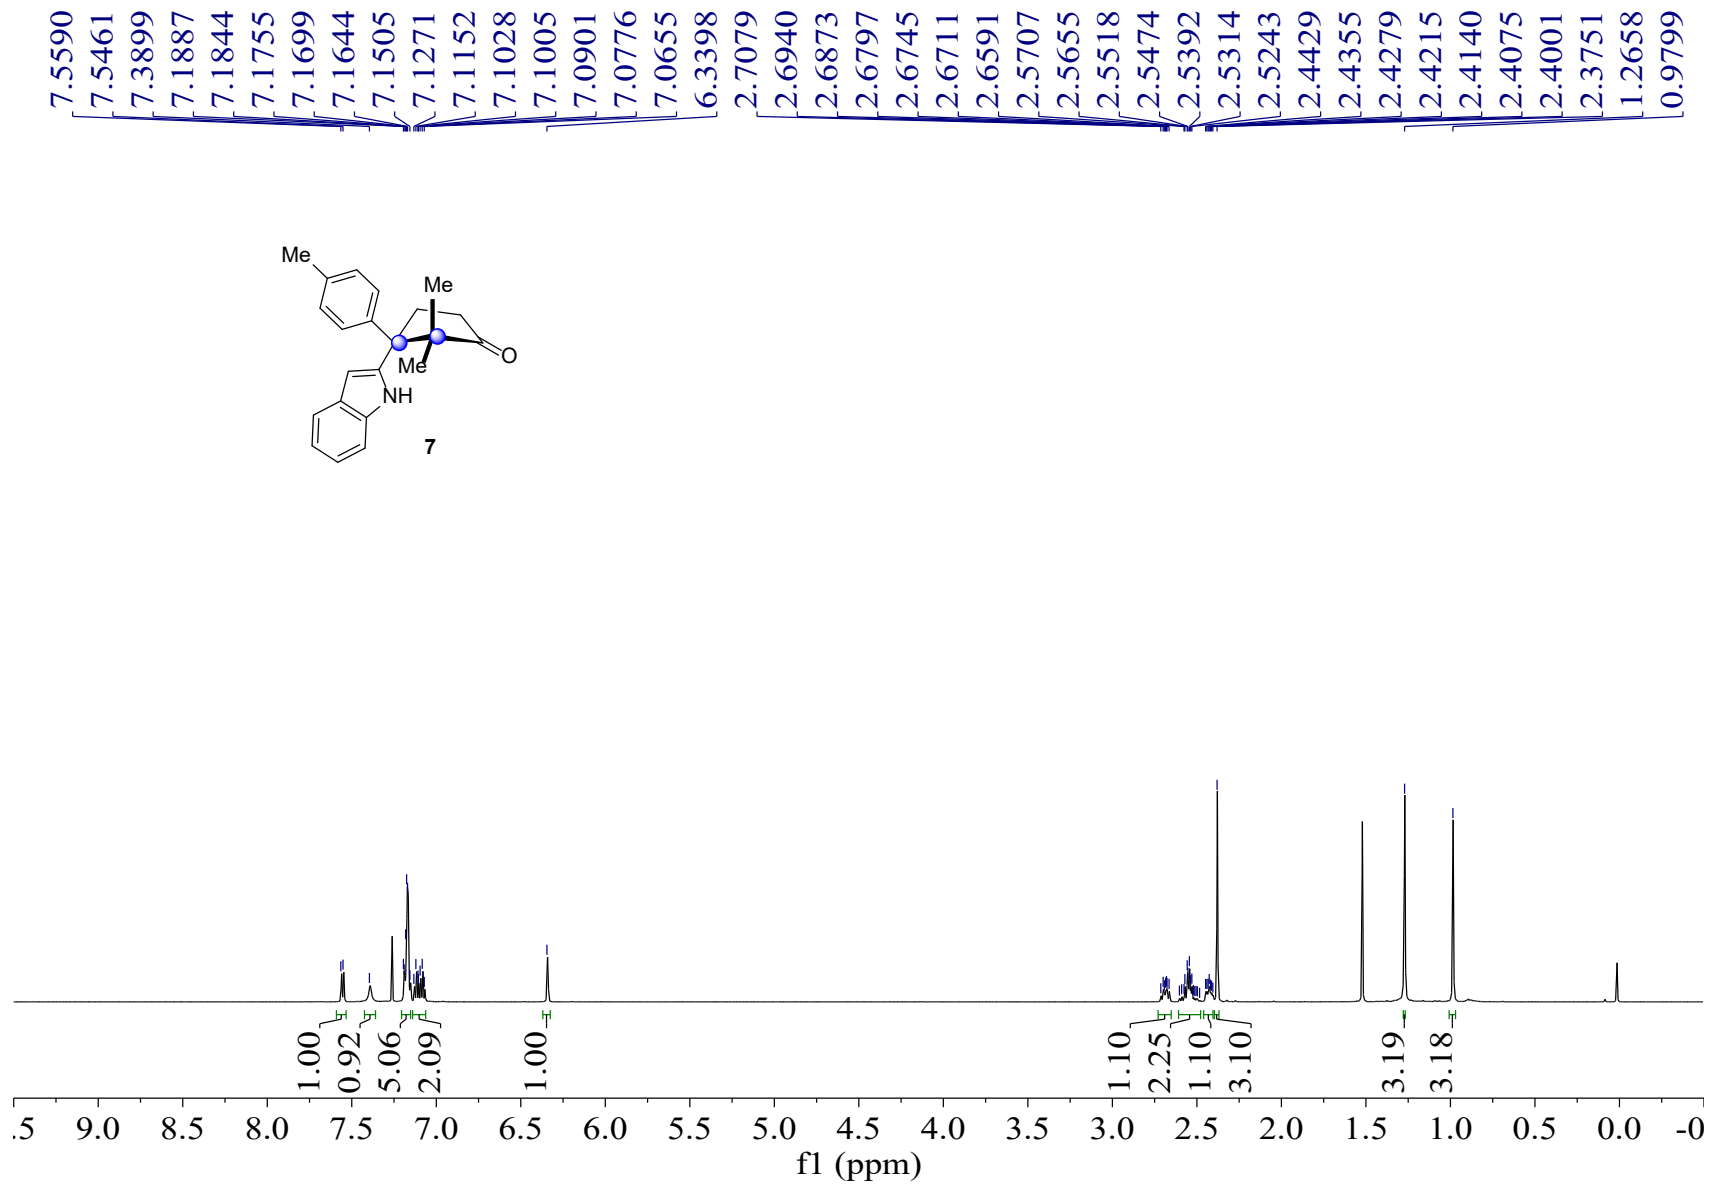

<sup>1</sup>H NMR spectrum of compound 7



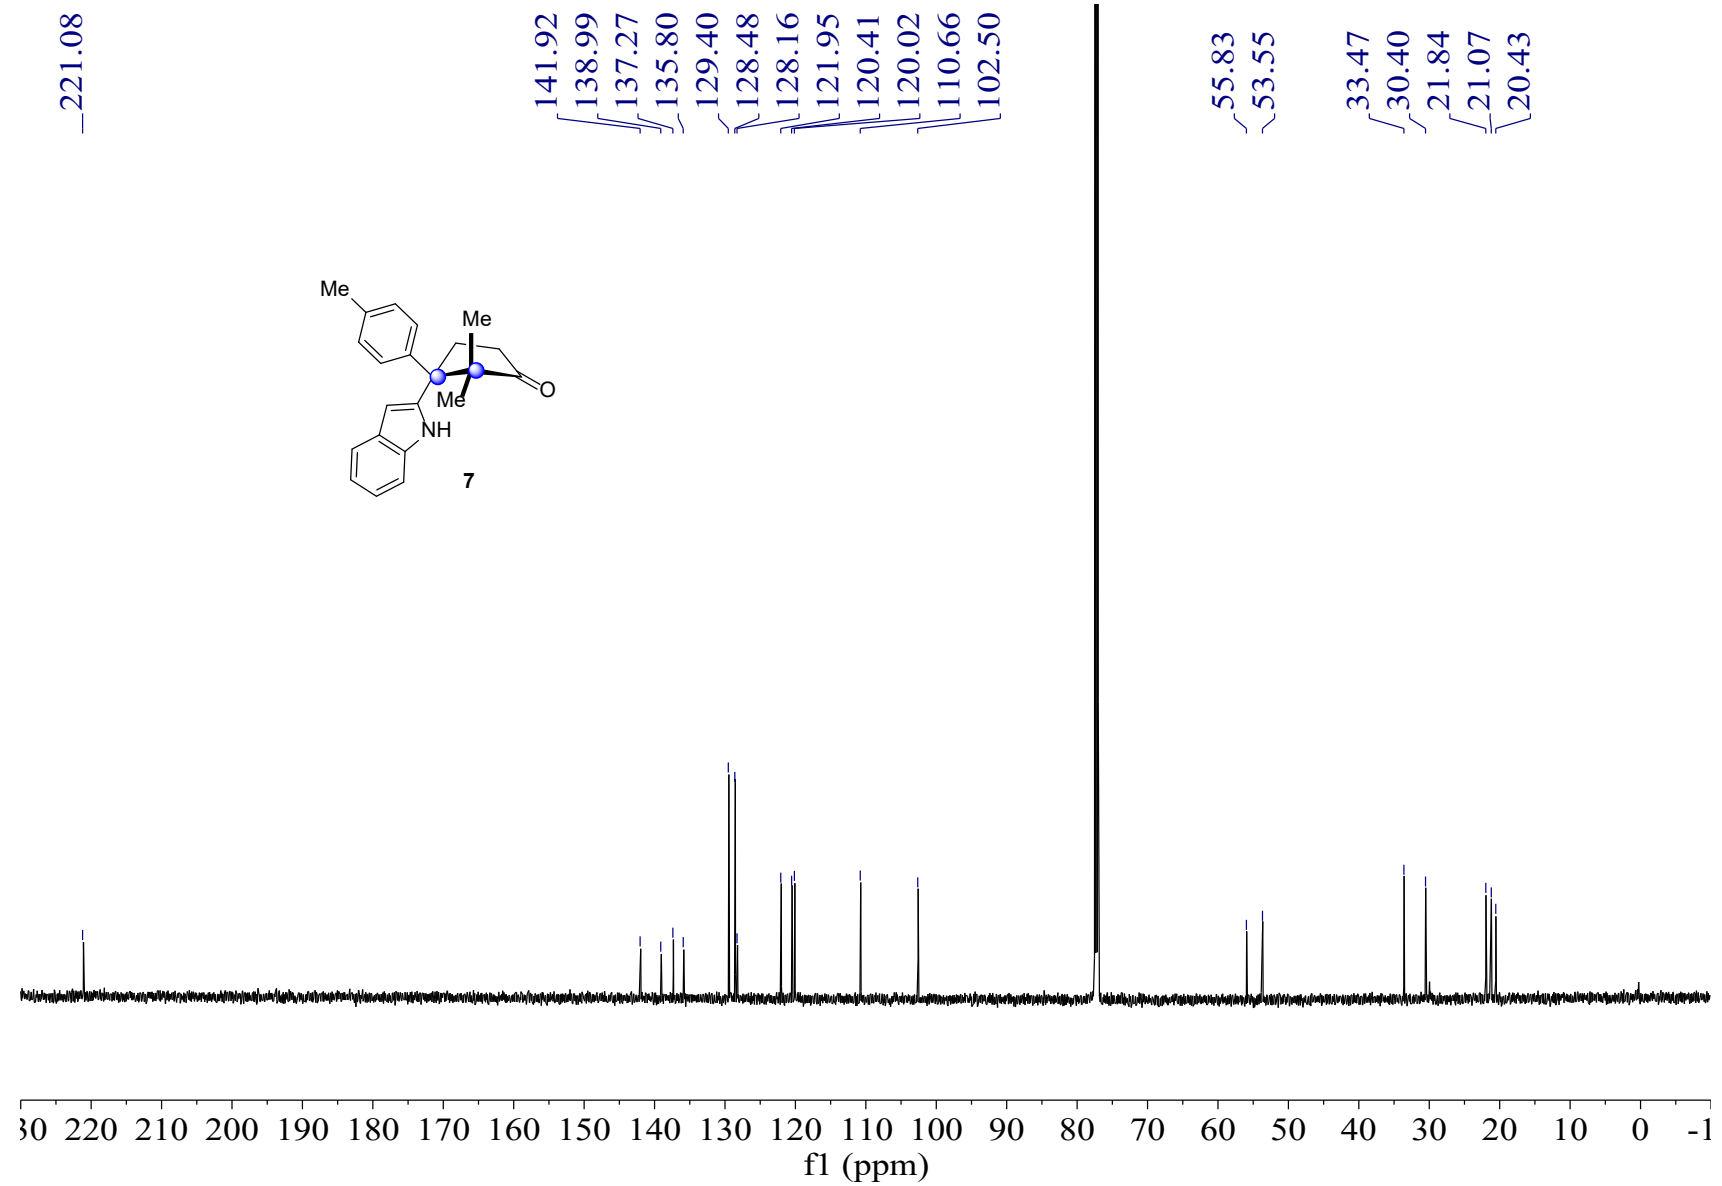

<sup>13</sup>C NMR spectrum of compound 7

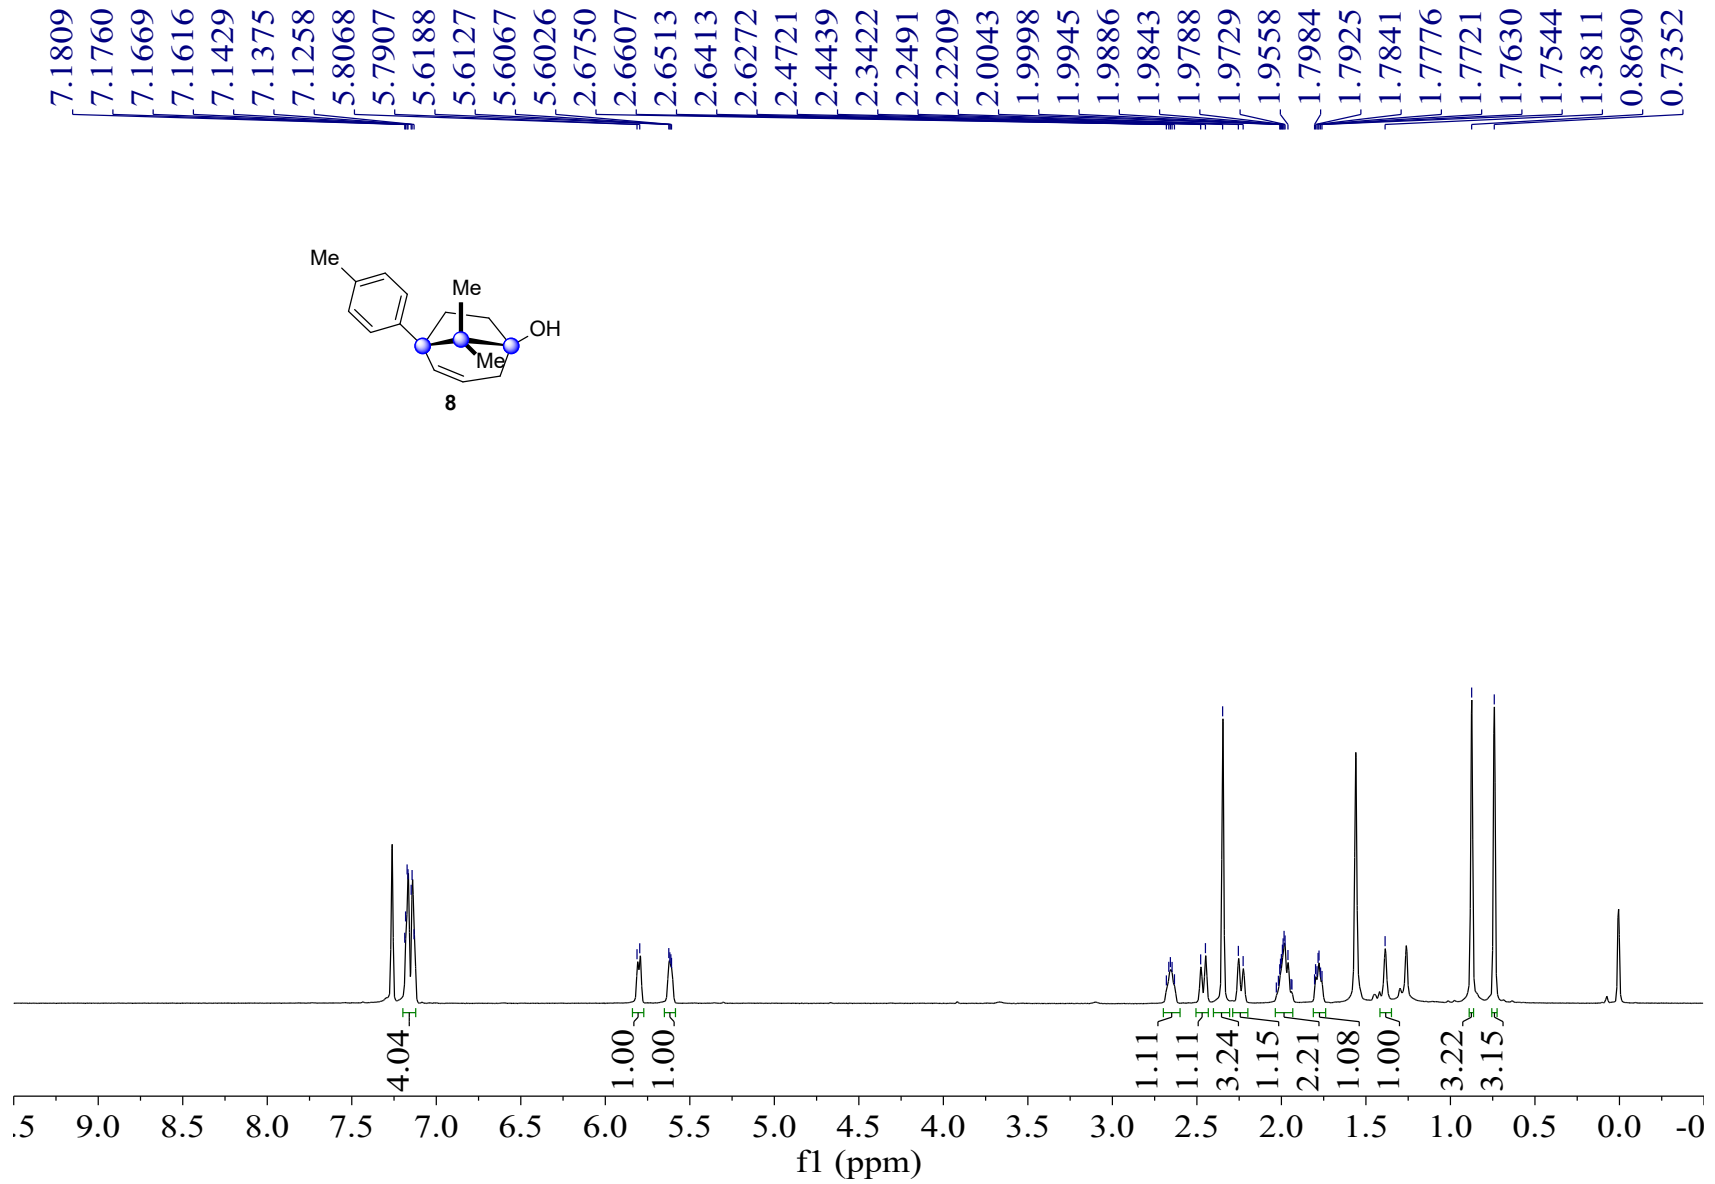

<sup>1</sup>H NMR spectrum of compound **8**

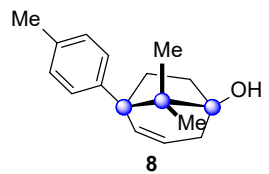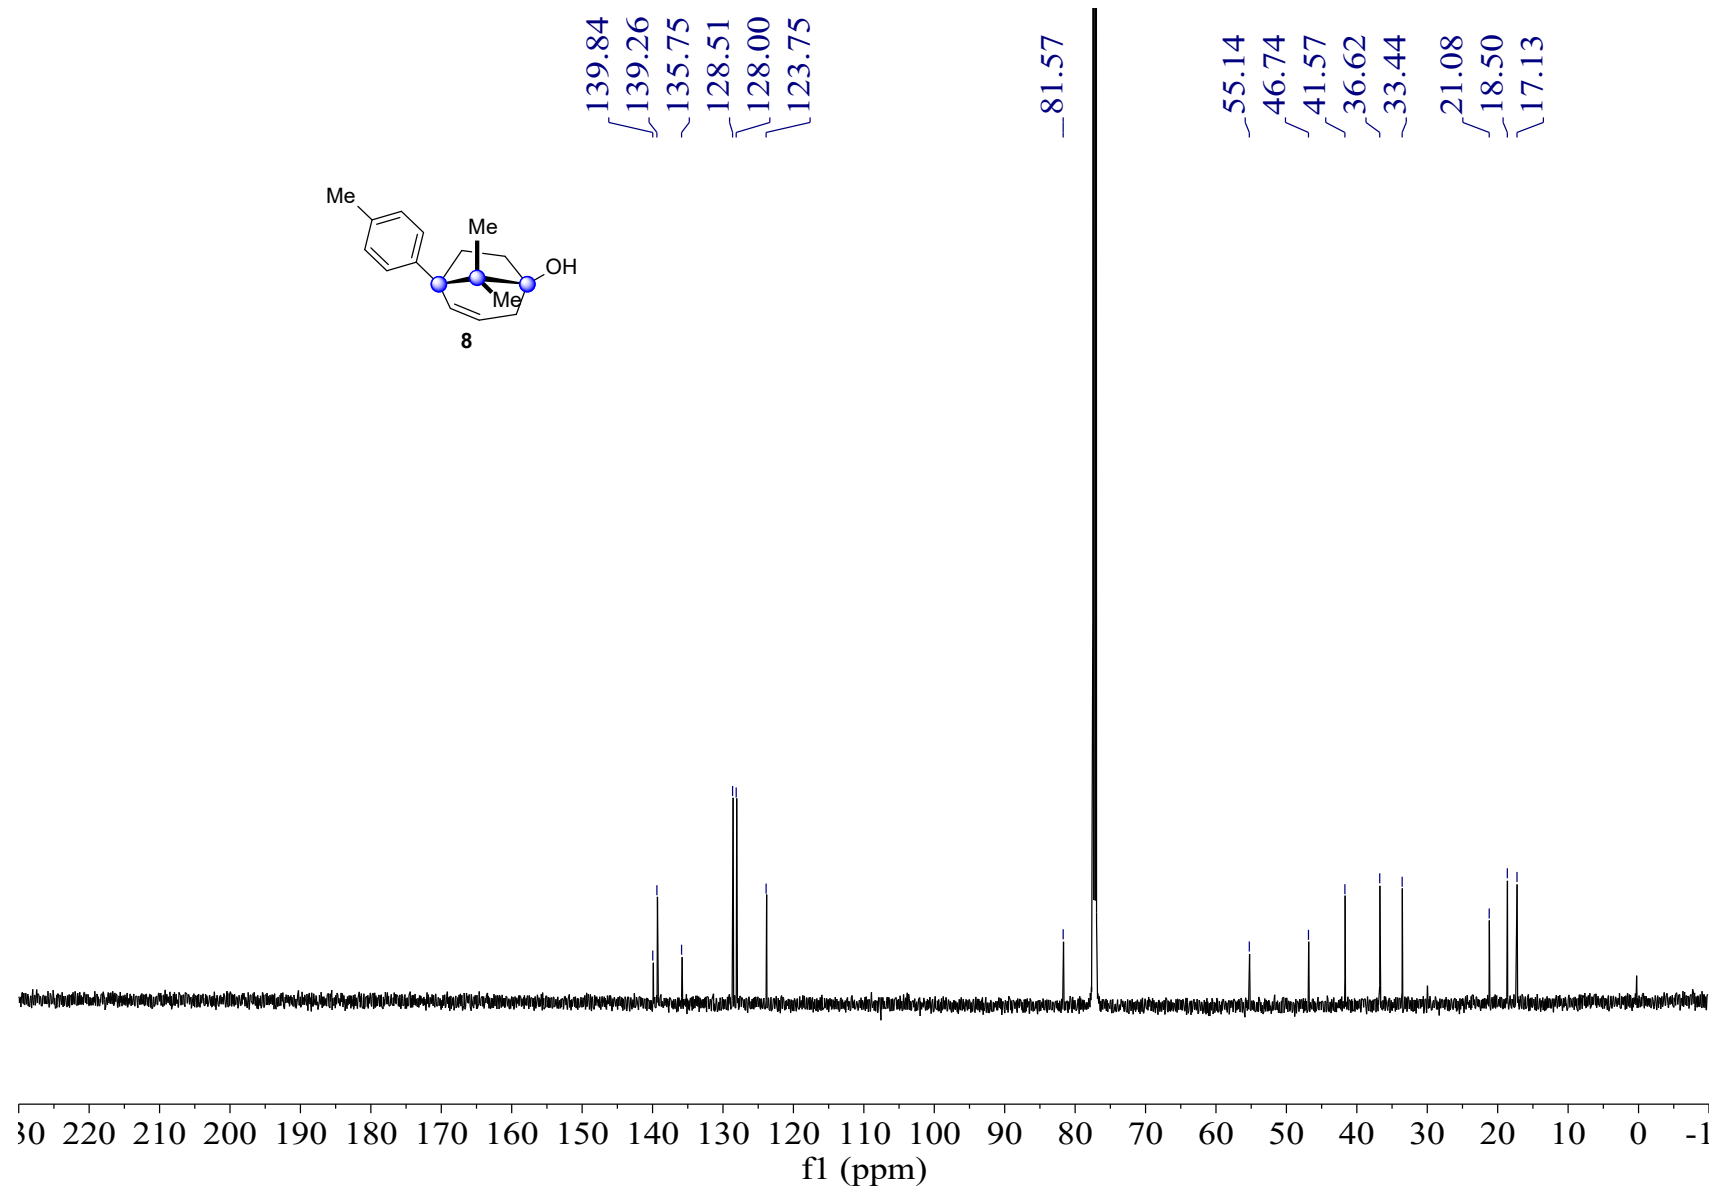

<sup>13</sup>C NMR spectrum of compound 8

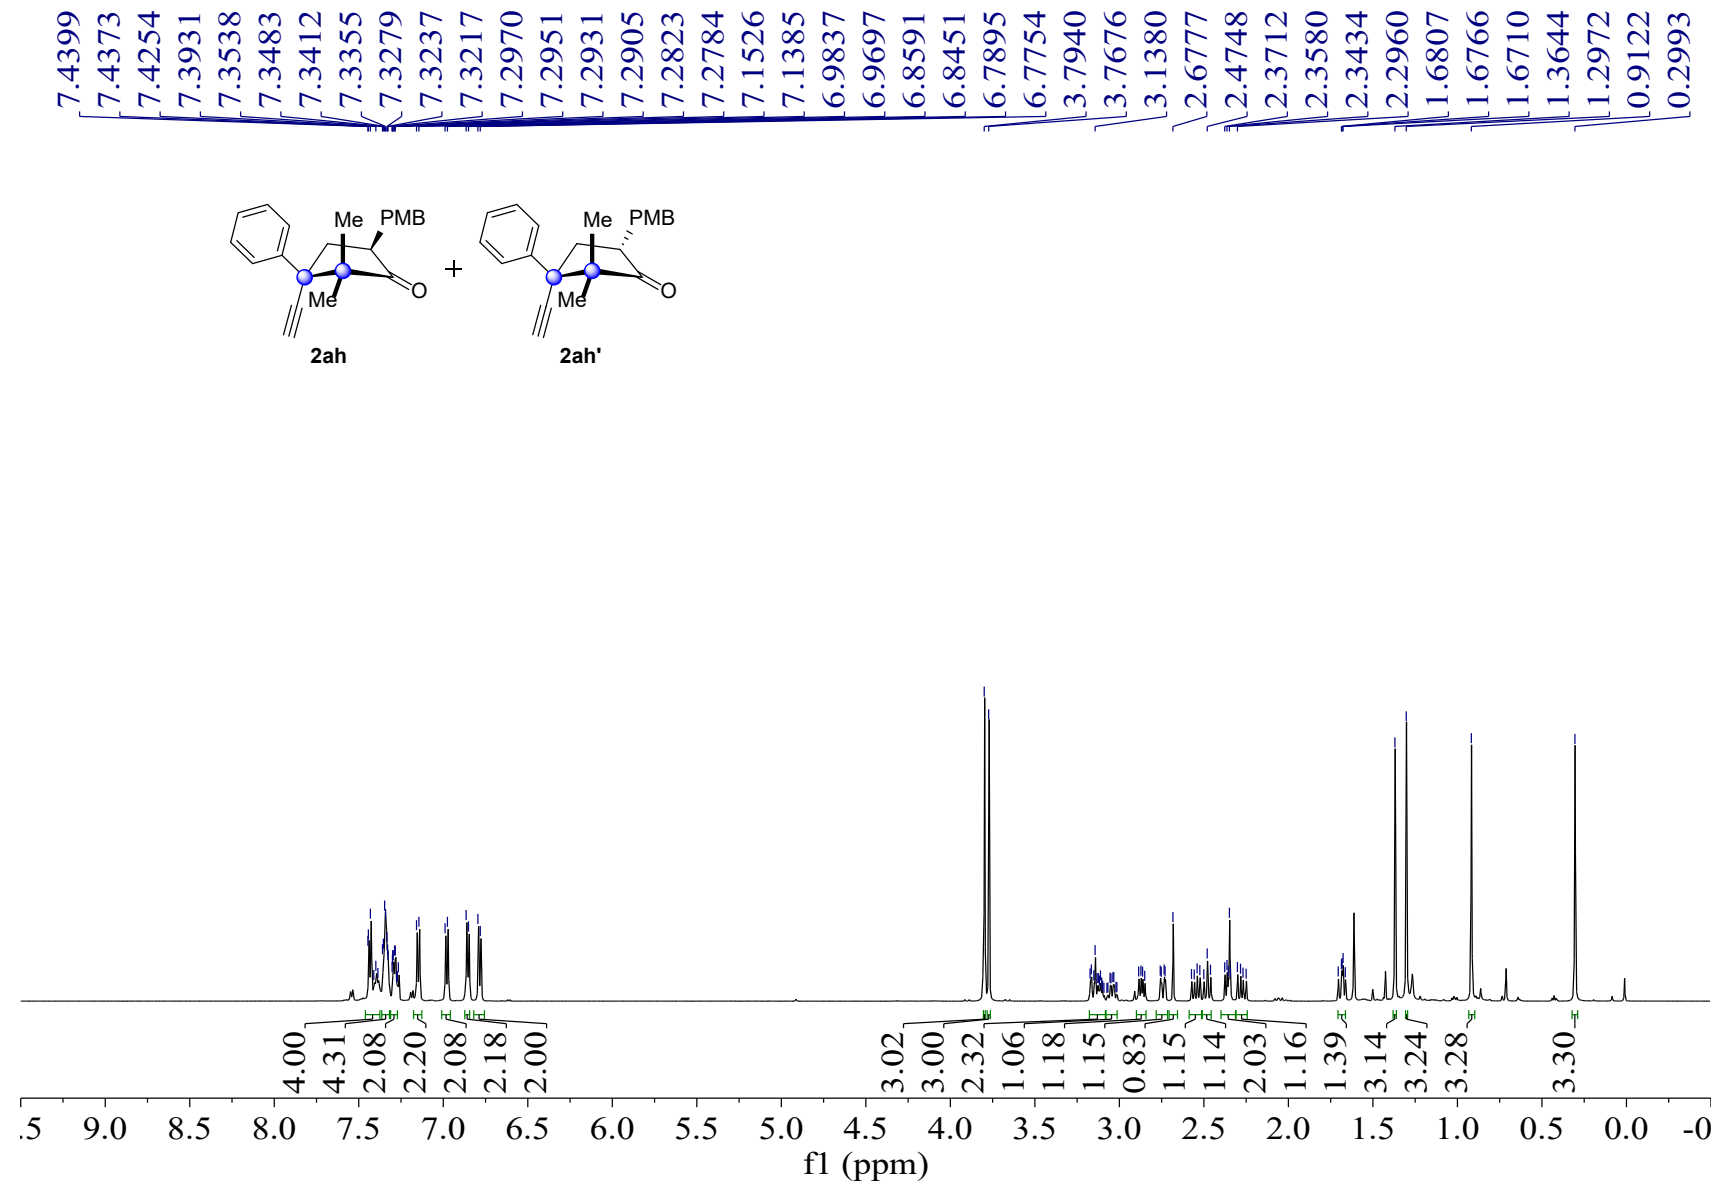

<sup>1</sup>H NMR spectrum of the mixture of **2ah** and **2ah'**

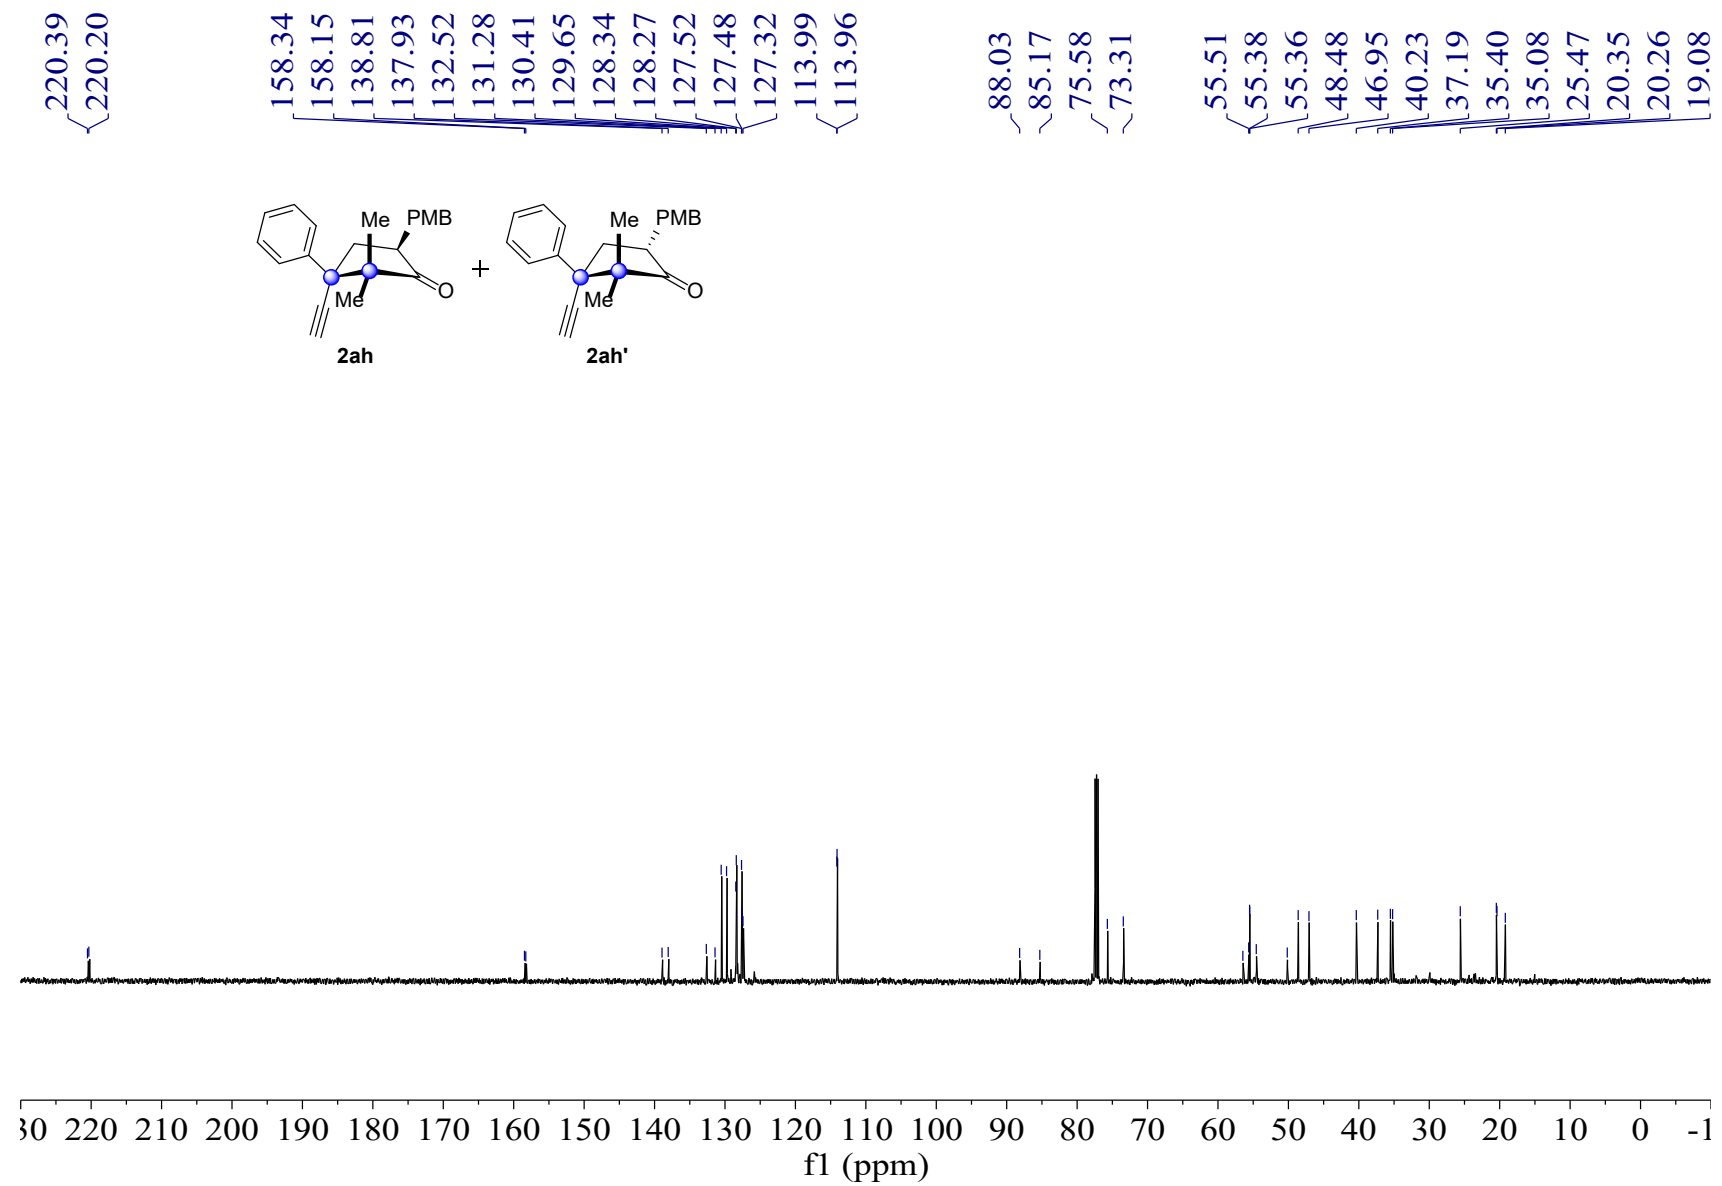

<sup>13</sup>C NMR spectrum of the mixture of **2ah** and **2ah'**

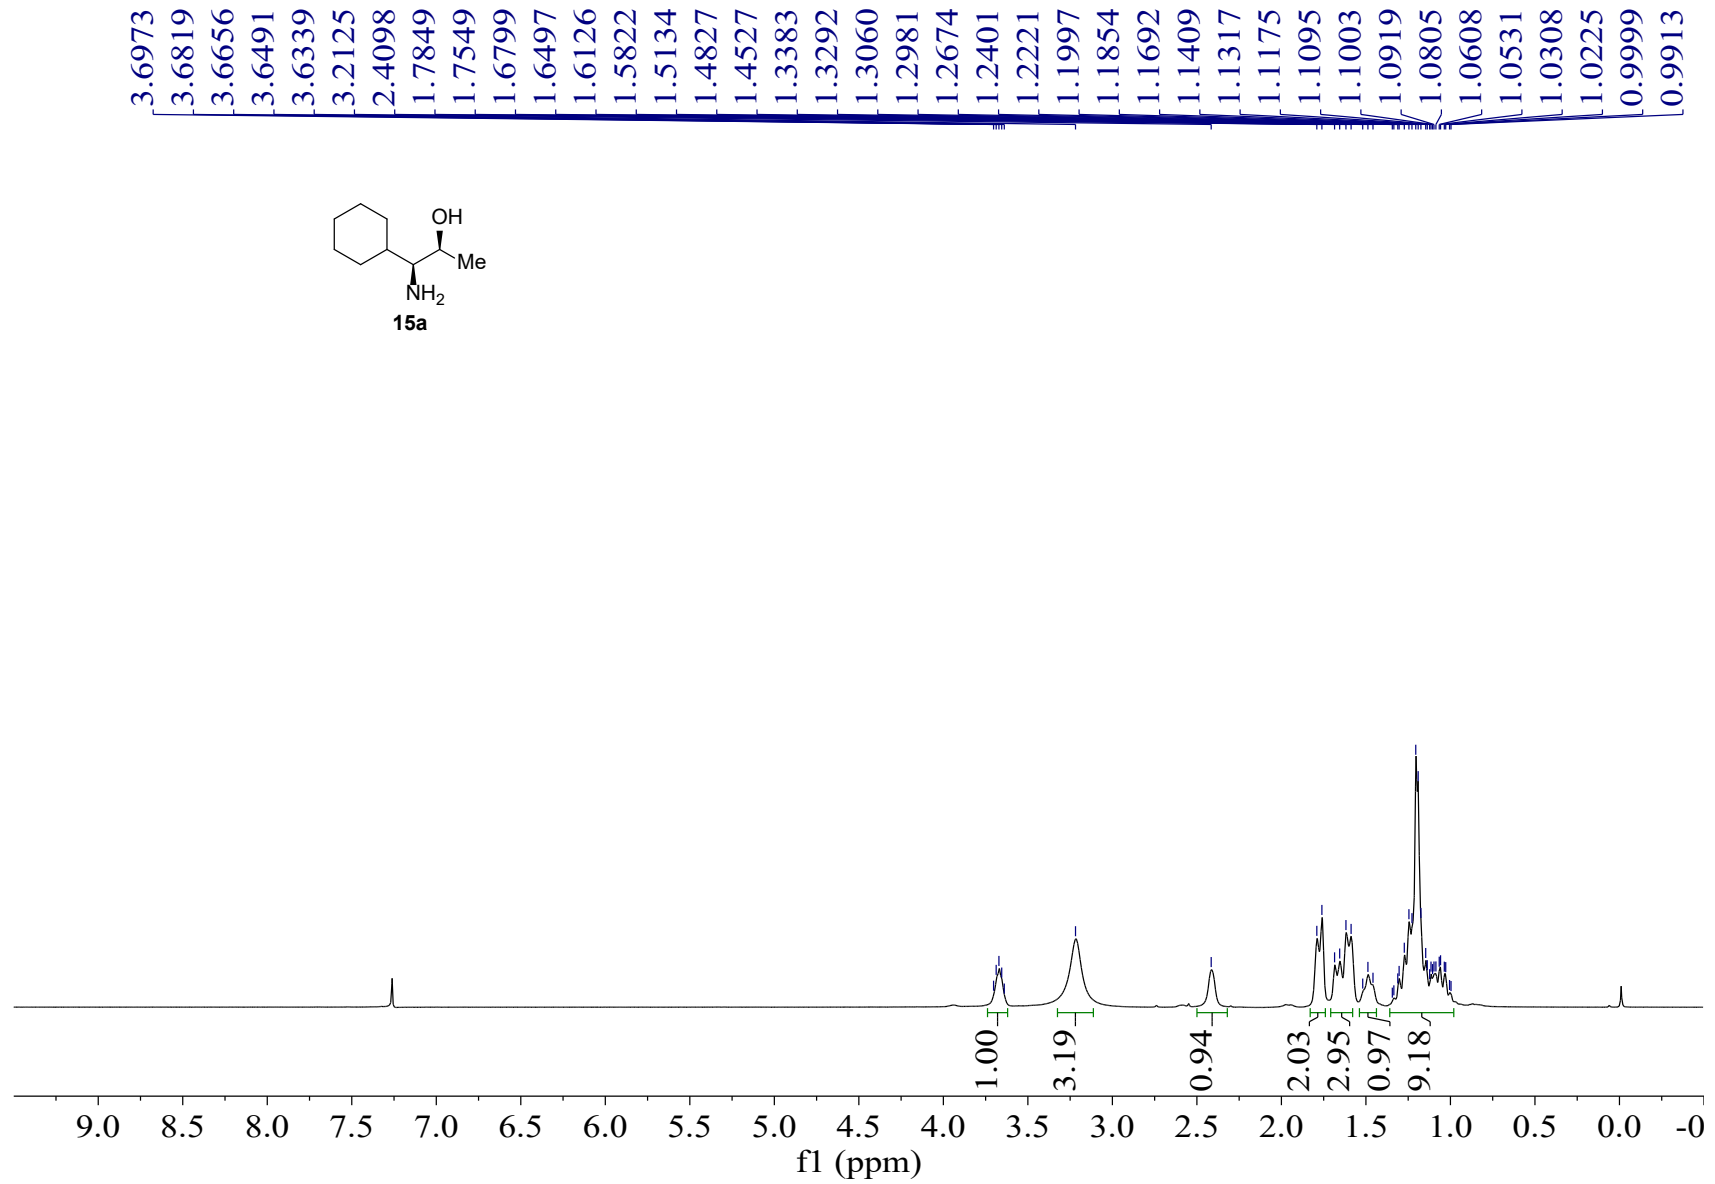

<sup>1</sup>H NMR spectrum of compound **15a**

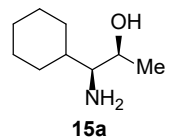

67.11  
62.58  
39.28  
31.10  
26.63  
26.49  
26.40  
26.33  
20.38

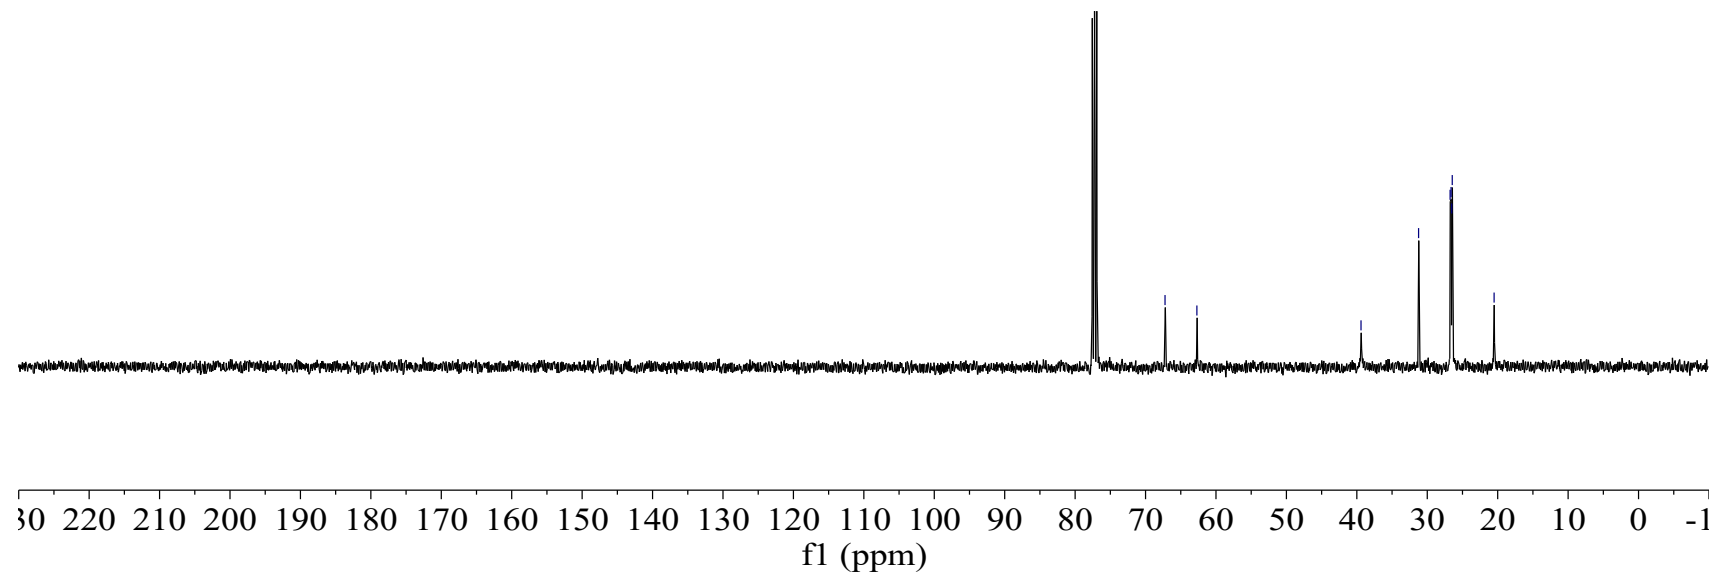

<sup>13</sup>C NMR spectrum of compound **15a**

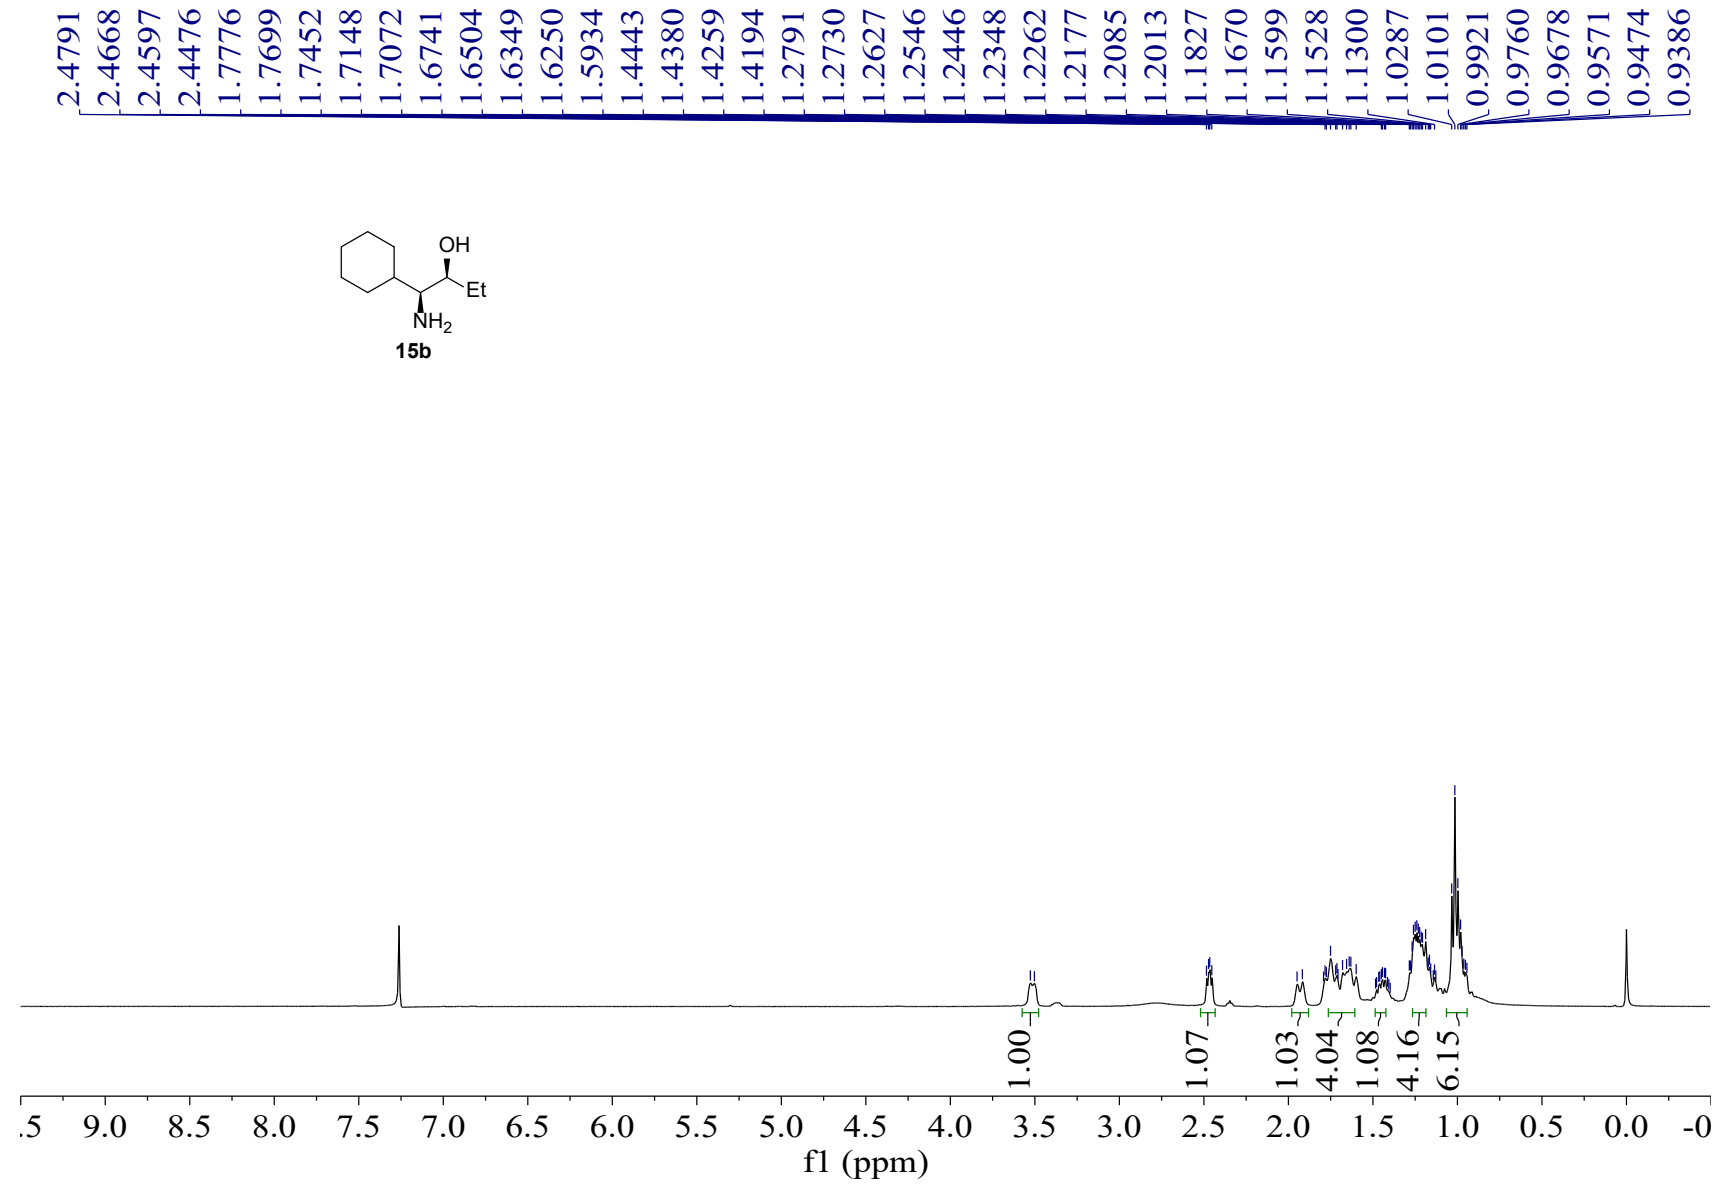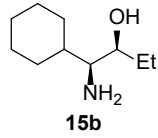

<sup>1</sup>H NMR spectrum of compound **15b**



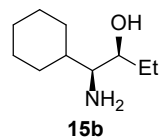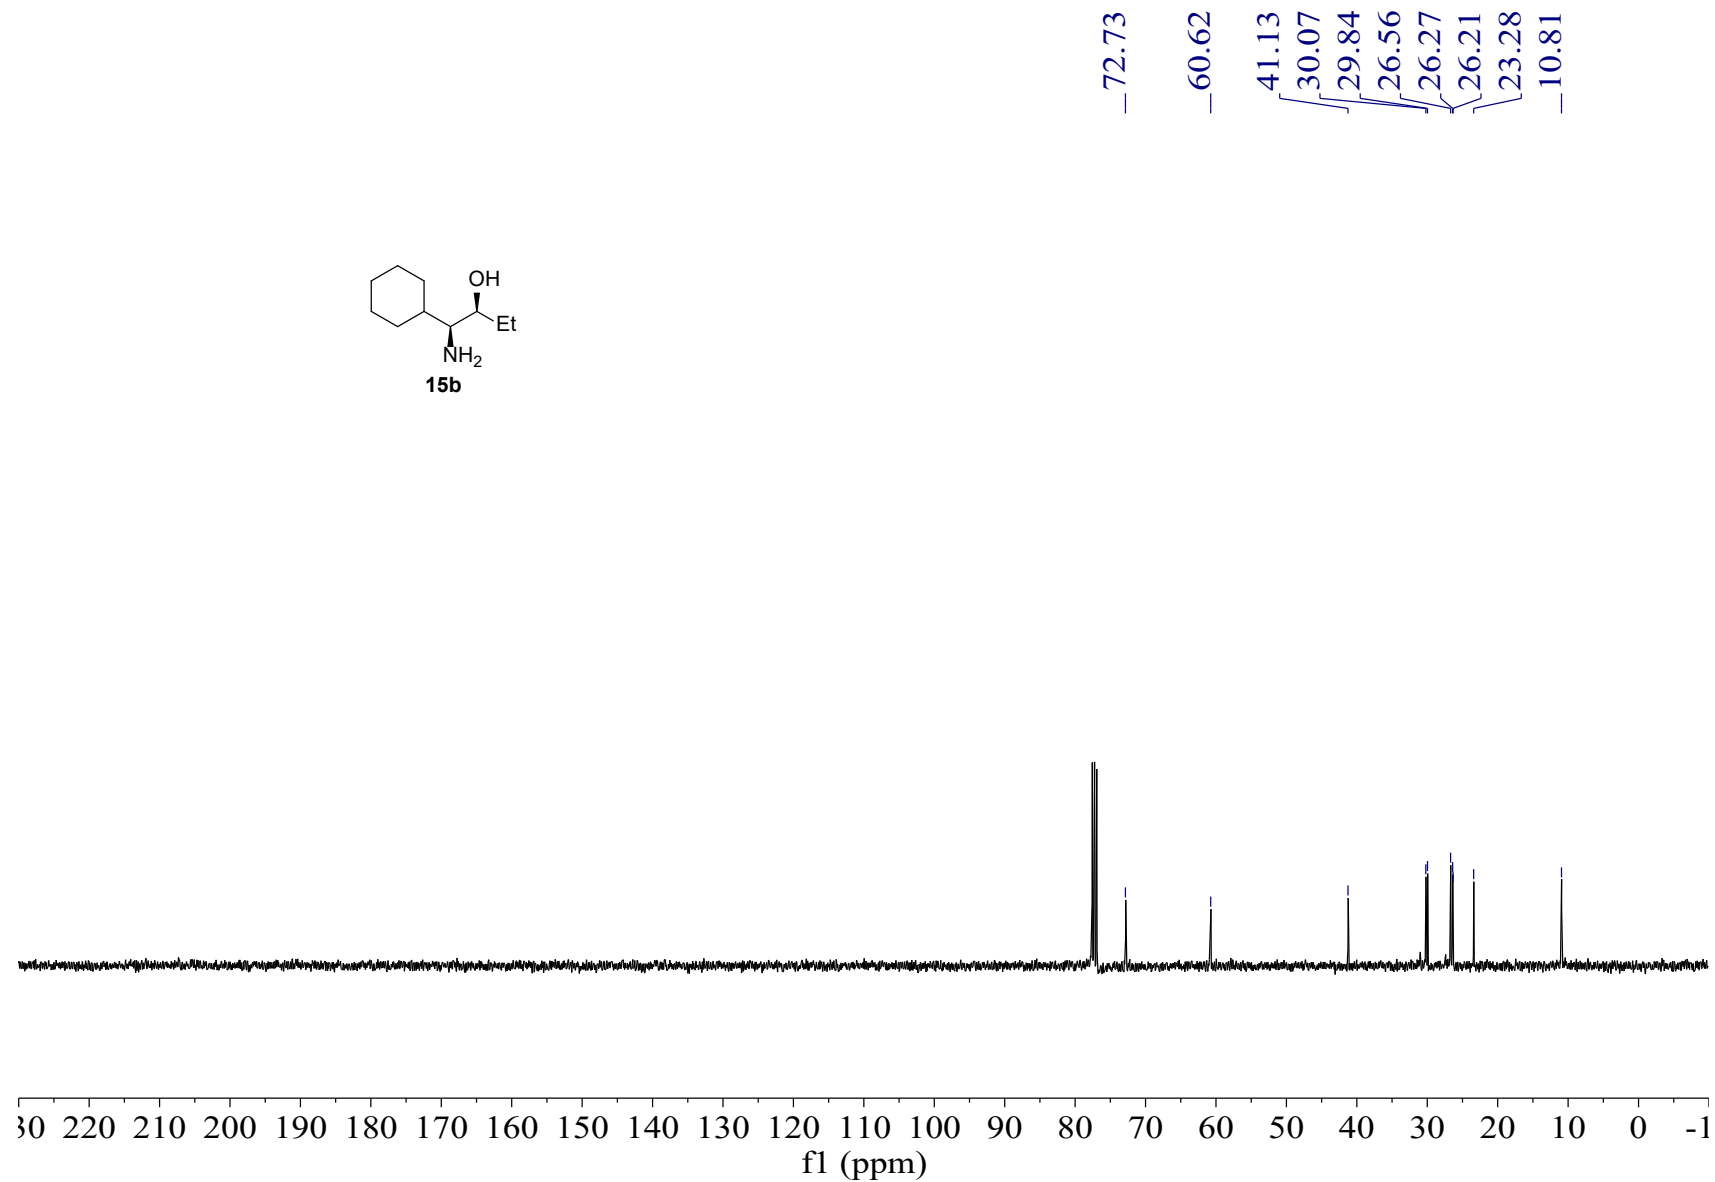

<sup>13</sup>C NMR spectrum of compound **15b**

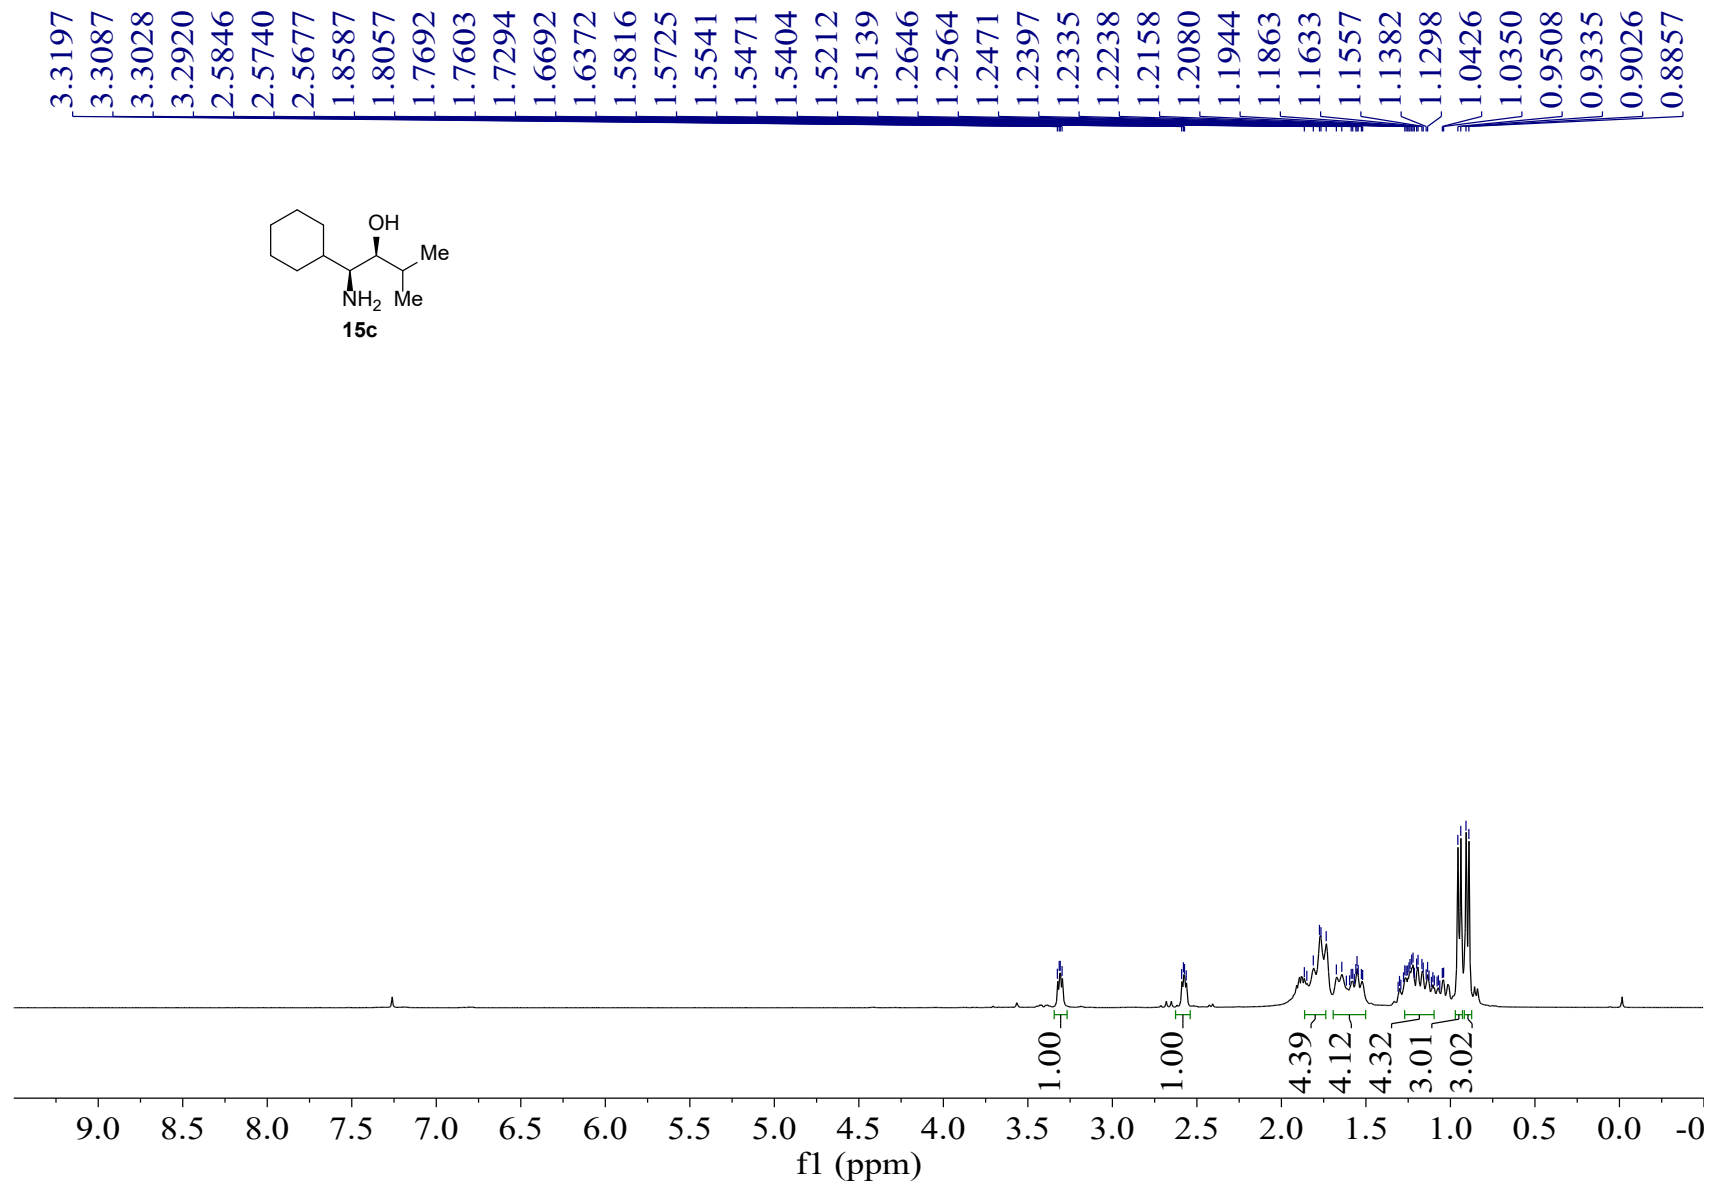

<sup>1</sup>H NMR spectrum of compound **15c**

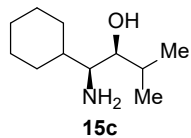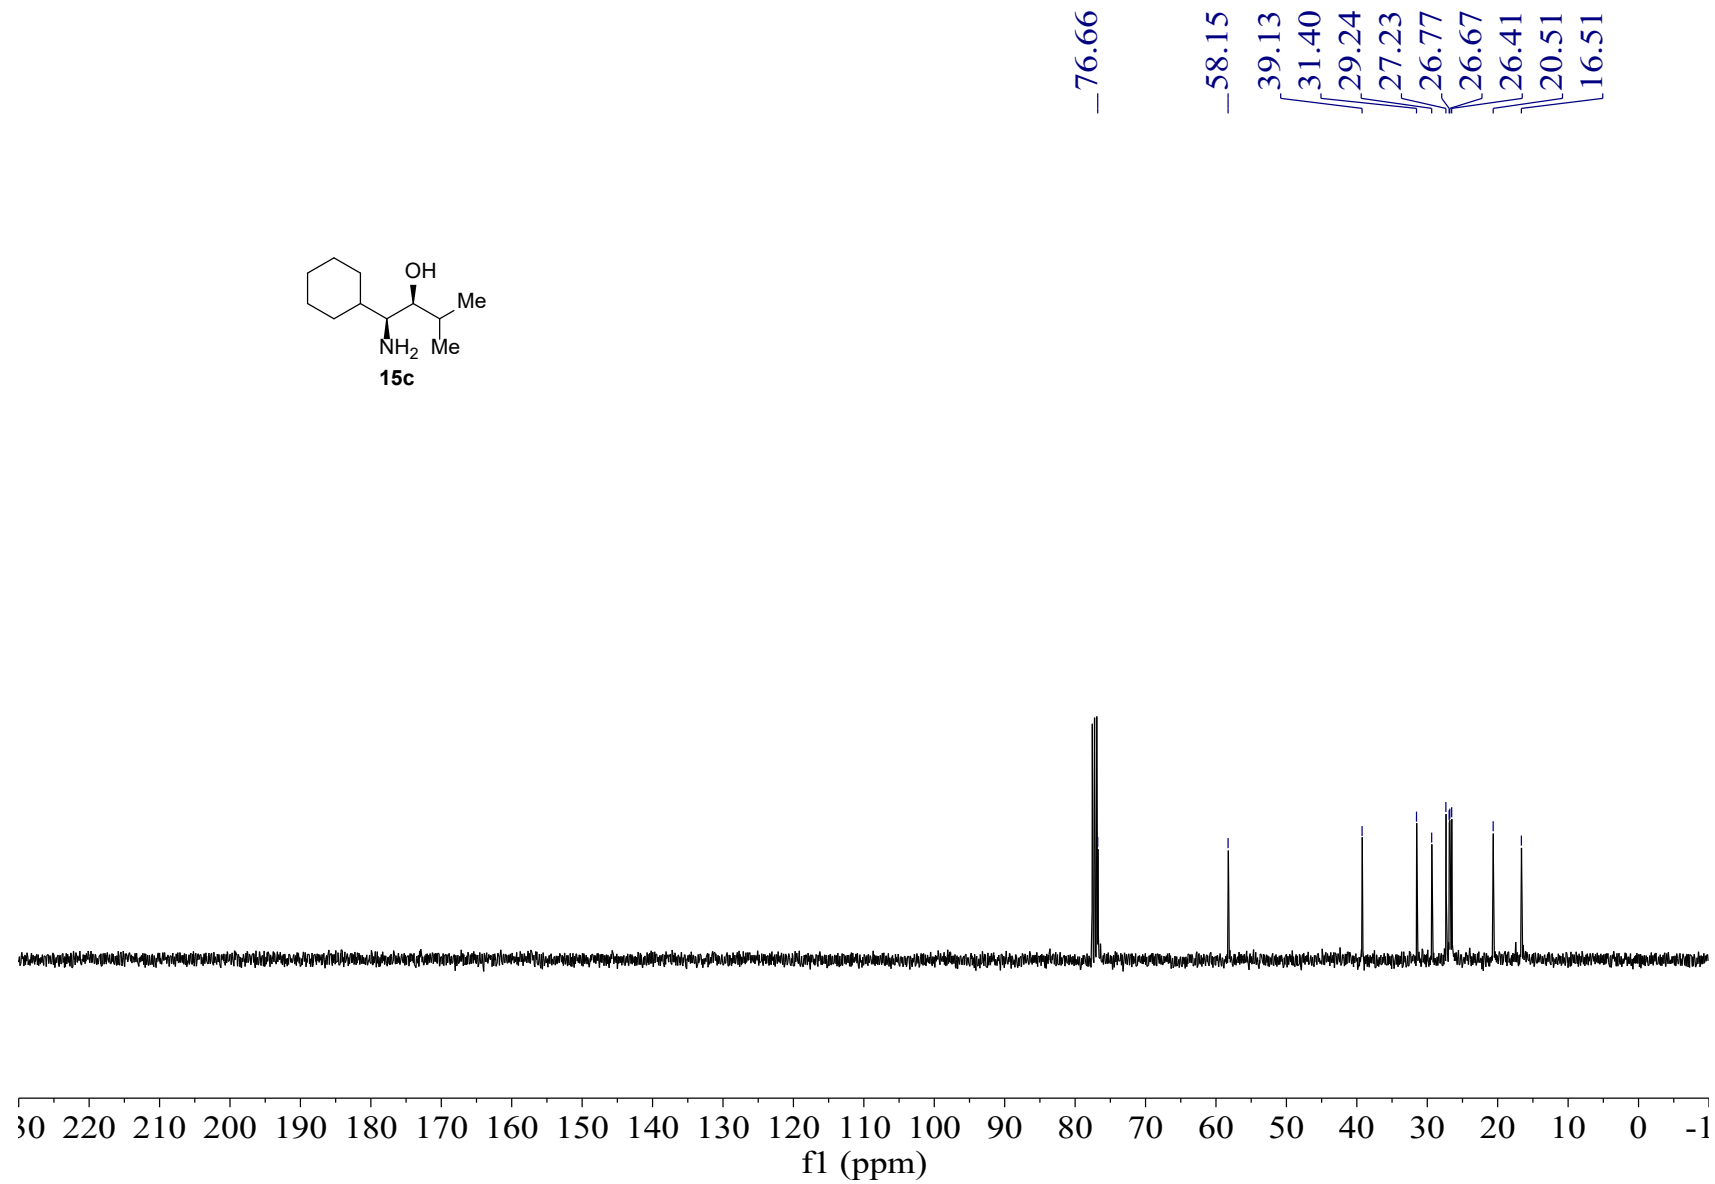

<sup>13</sup>C NMR spectrum of compound **15c**

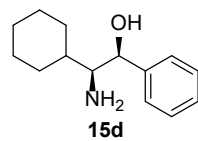

7.3378  
7.3268  
7.2936  
7.2830  
7.2716  
7.2588

4.7291  
4.7158  
2.8013  
2.7880  
2.7748  
2.3833  
1.7662  
1.7366  
1.7104  
1.3423  
1.3176  
1.2985  
1.2788  
1.2713  
1.2422  
1.2300  
1.2032  
1.1894  
1.1643  
1.1426  
1.1336  
1.1205  
1.1004  
1.0454  
1.0144  
0.9852  
0.9615  
0.9517

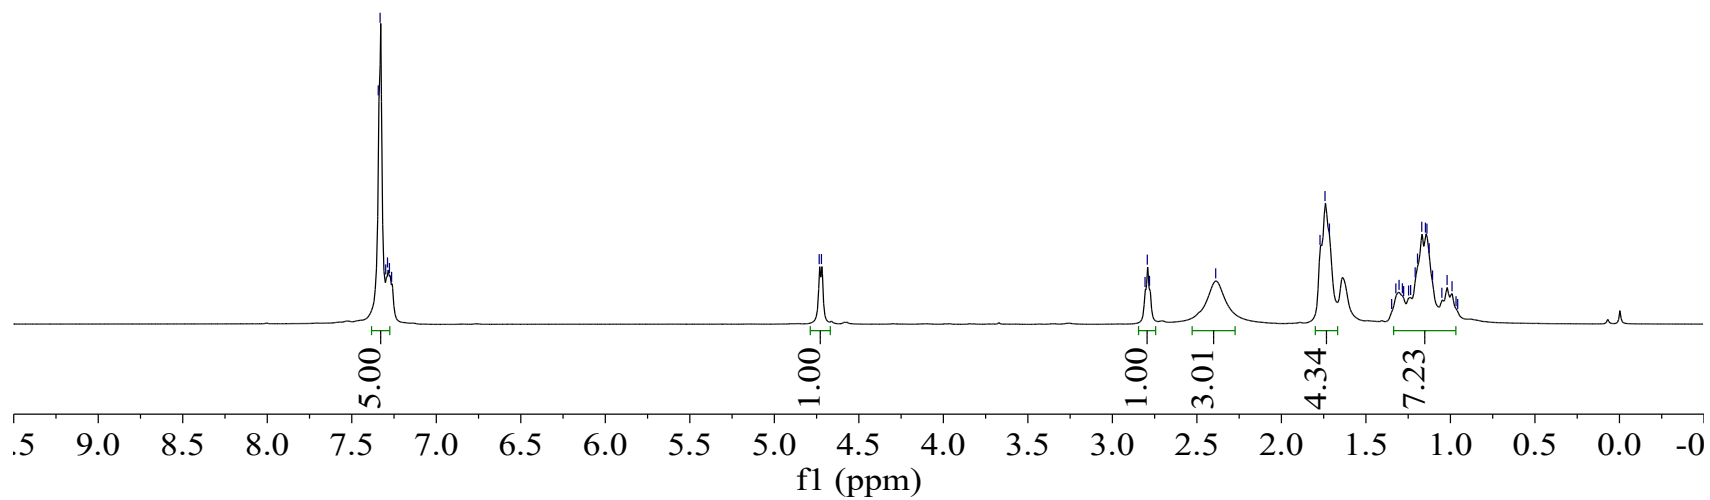

<sup>1</sup>H NMR spectrum of compound **15d**

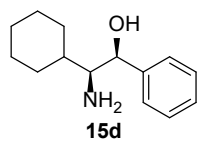

-141.75  
128.40  
127.72  
127.04

-74.06  
-61.41

39.15  
31.18  
27.86  
26.55  
26.33  
26.19

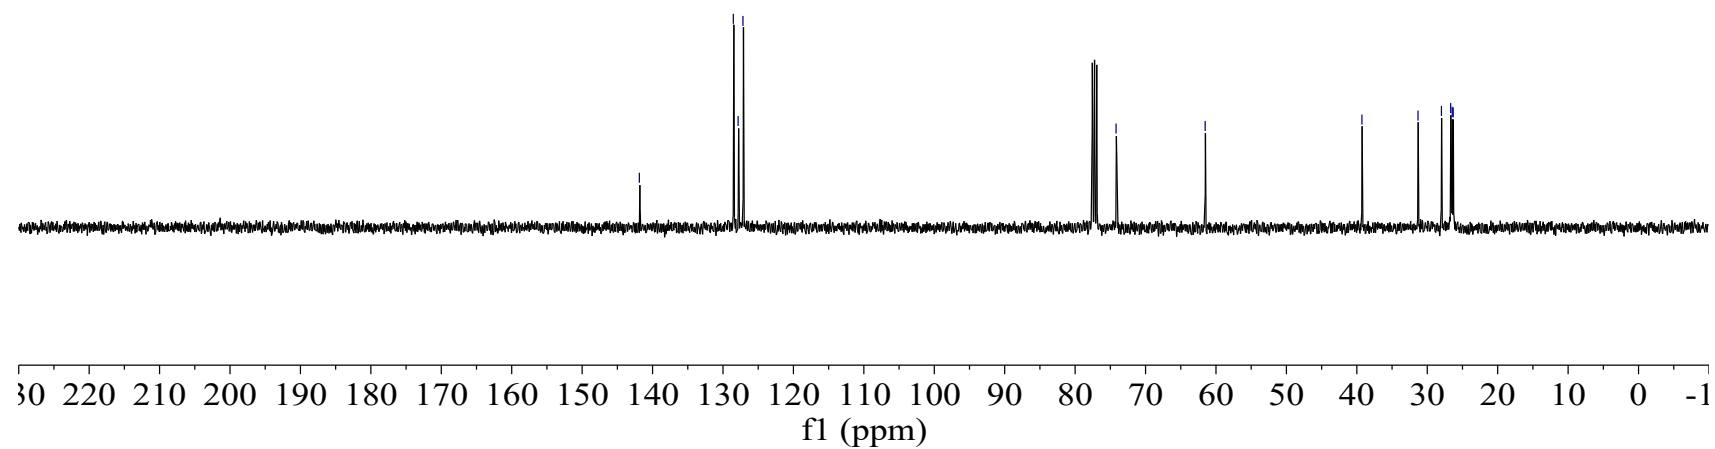

<sup>13</sup>C NMR spectrum of compound **15d**

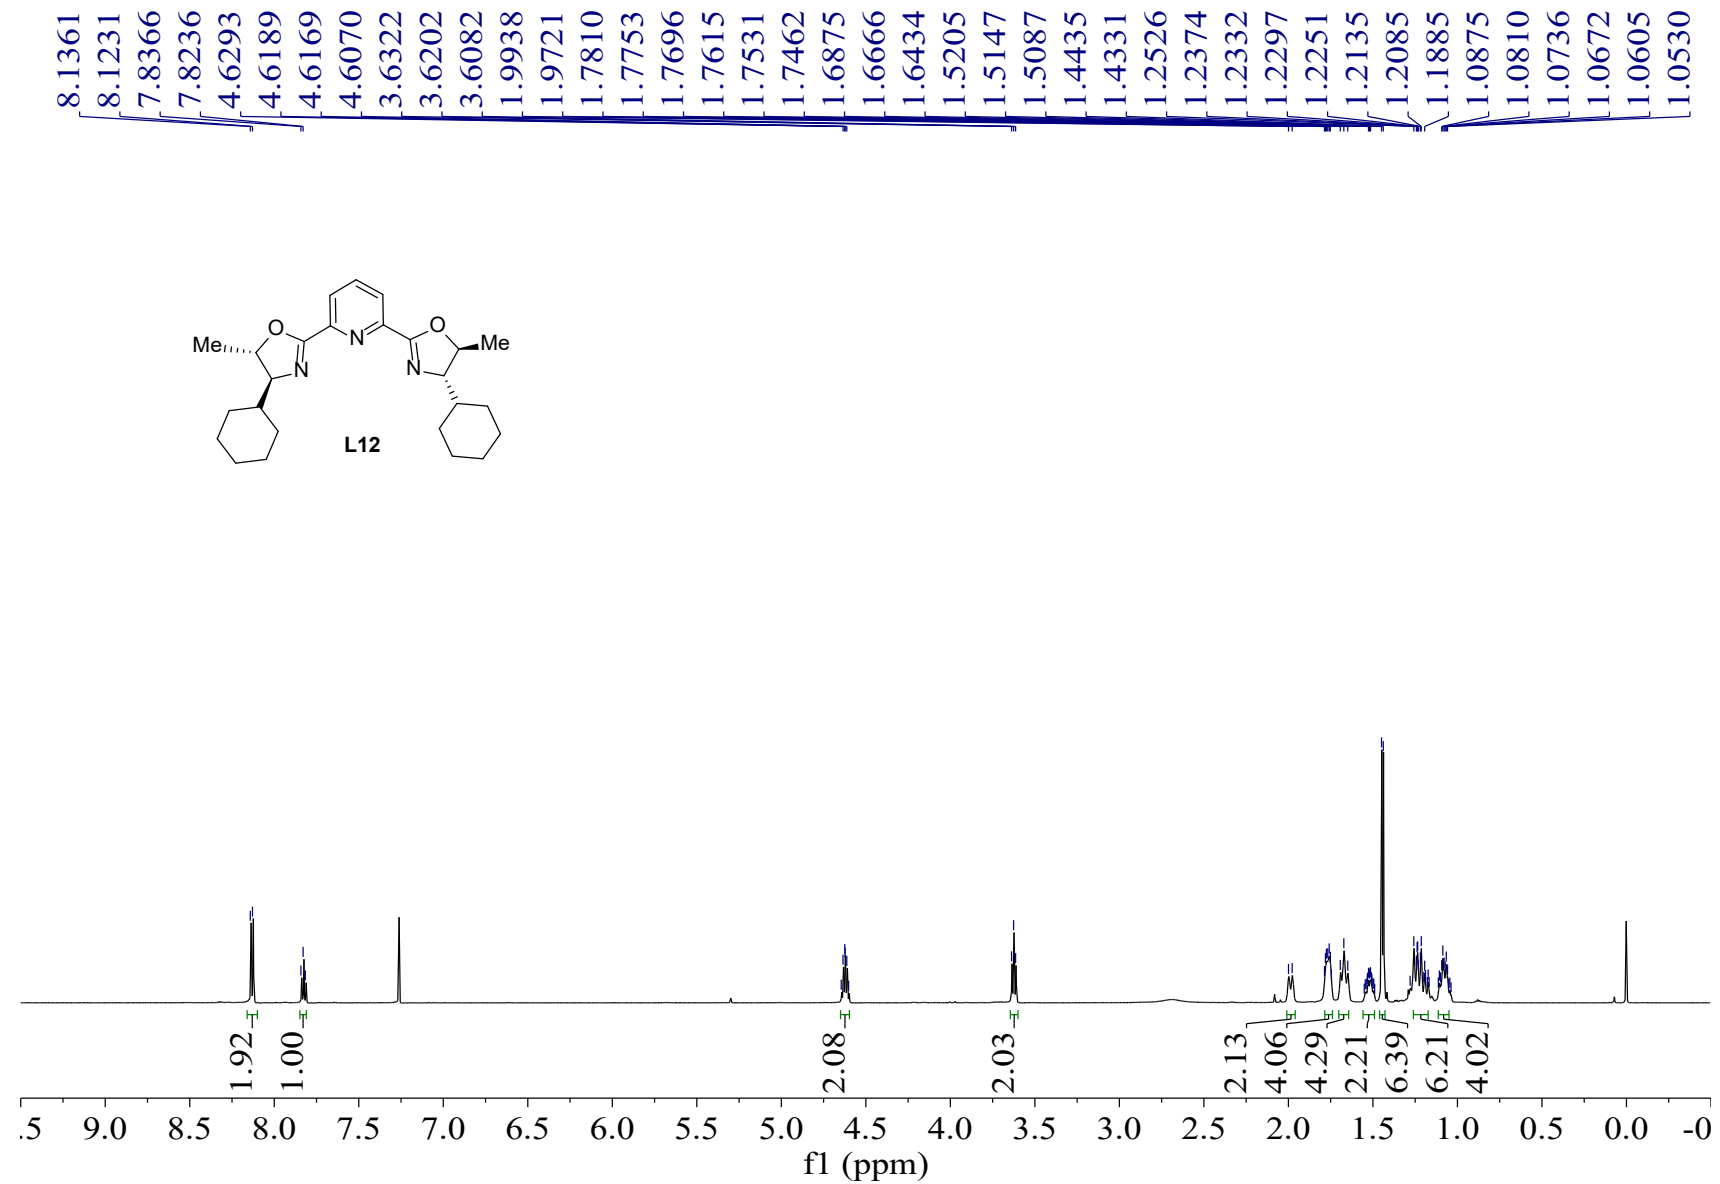

<sup>1</sup>H NMR spectrum of compound L12

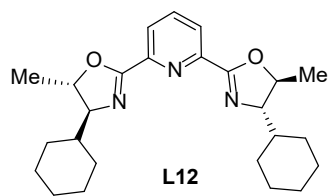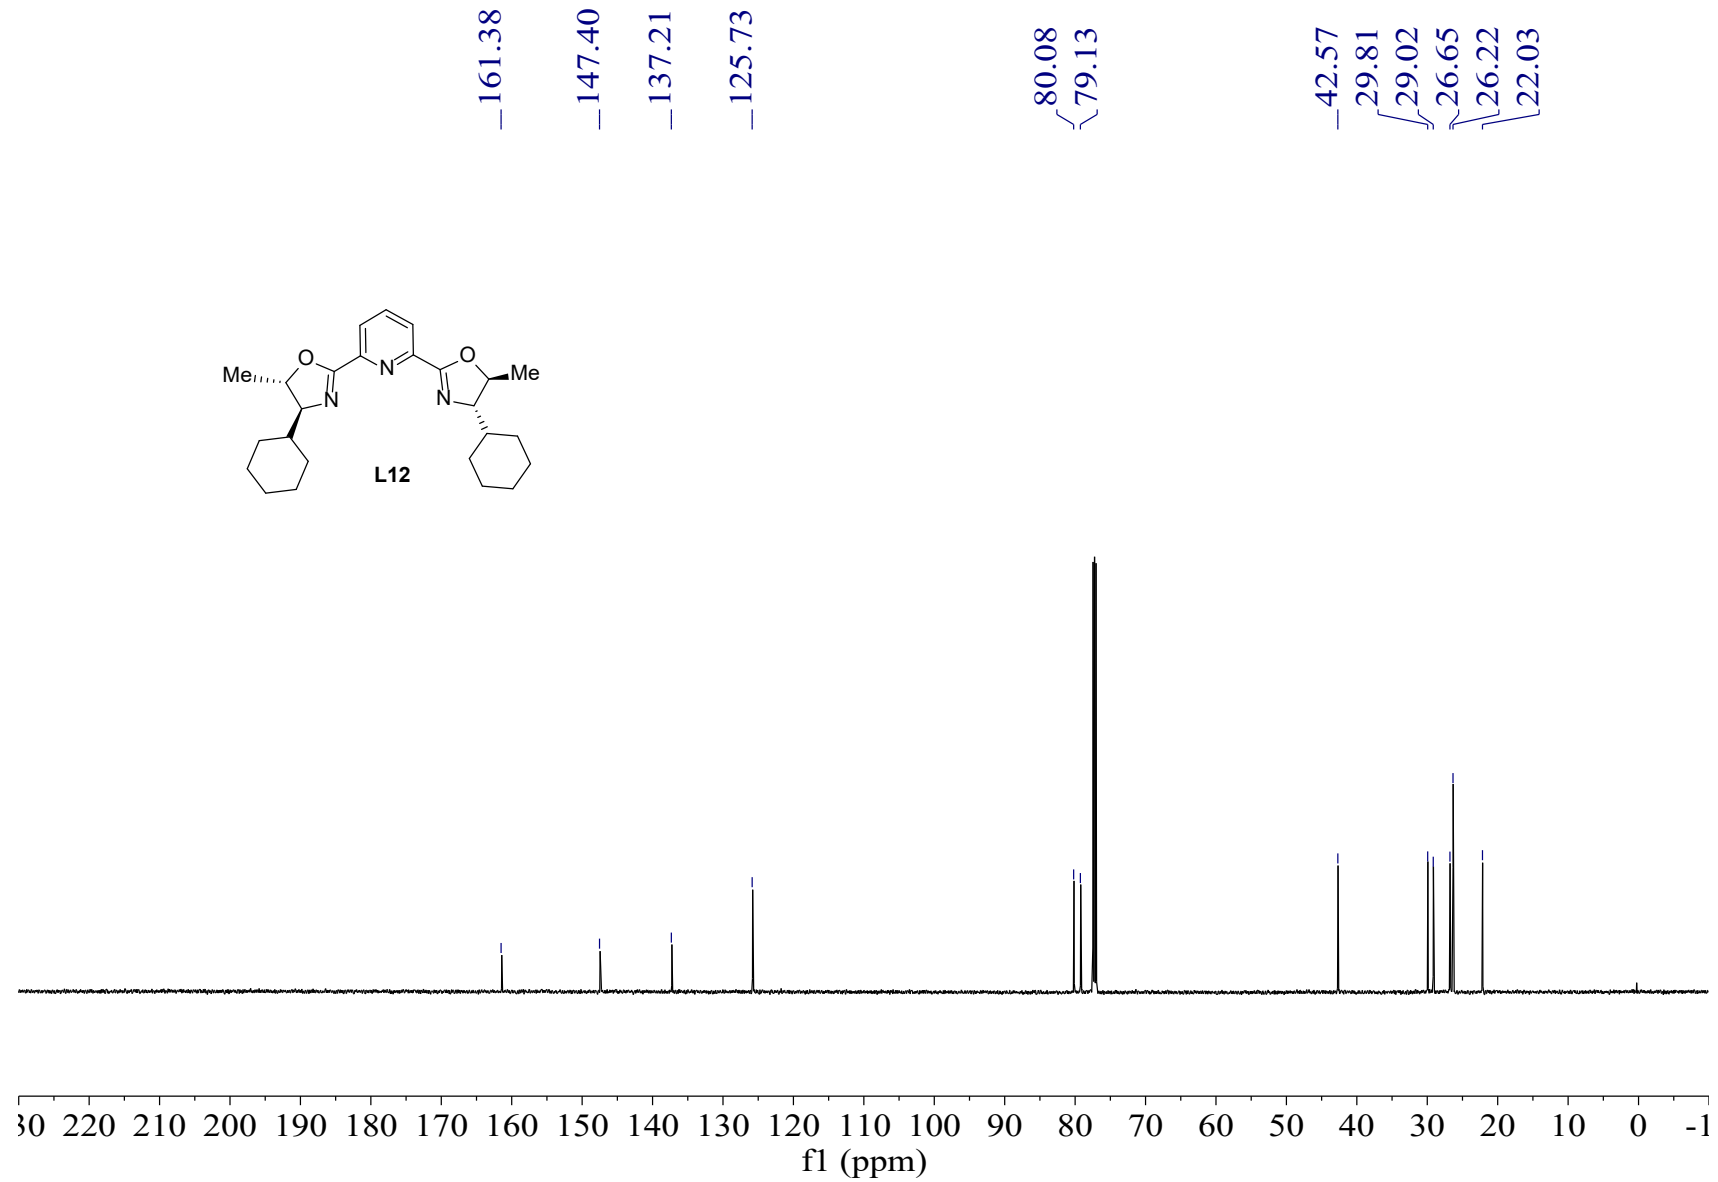

$^{13}\text{C}$  NMR spectrum of compound **L12**

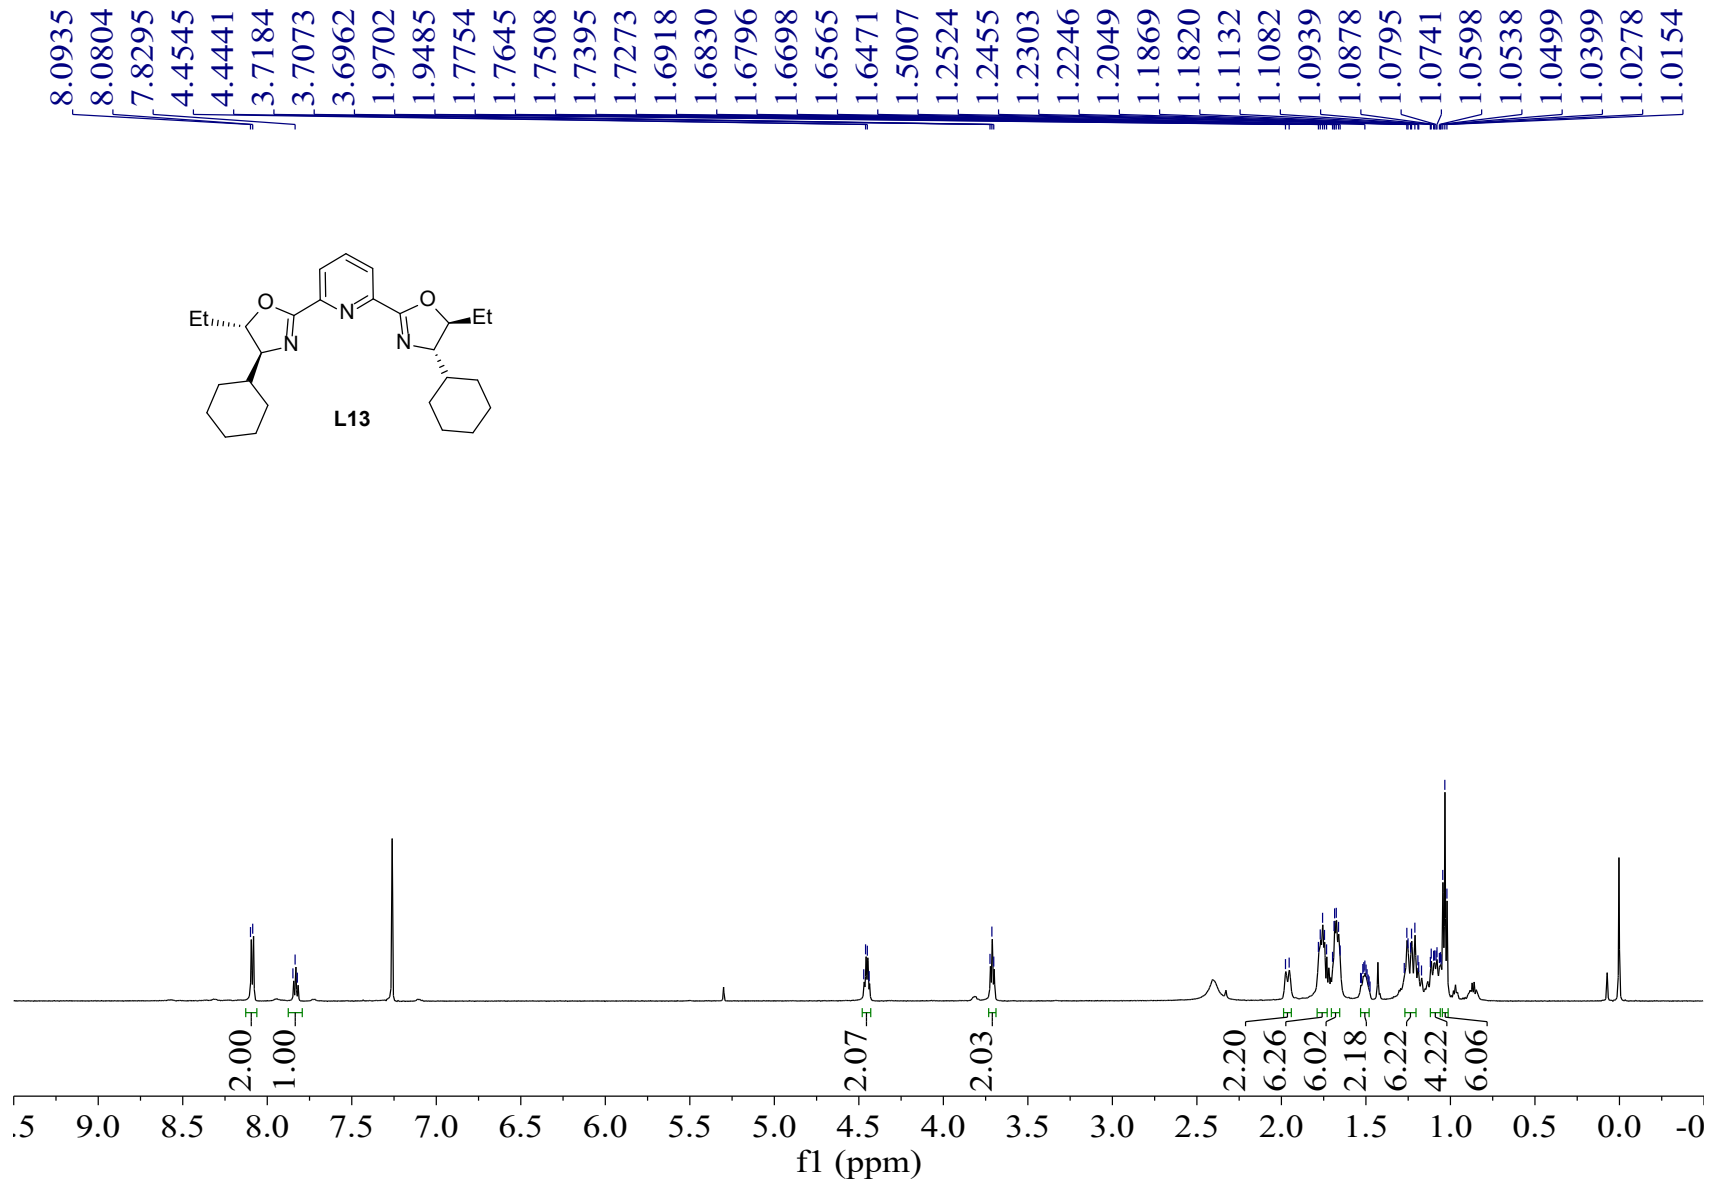

<sup>1</sup>H NMR spectrum of compound L13



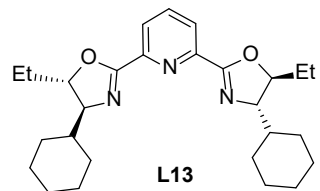

—161.44

—147.36

—137.20

—125.59

—84.76

—76.72

—42.71

29.57

29.11

28.90

26.63

26.25

26.23

9.55

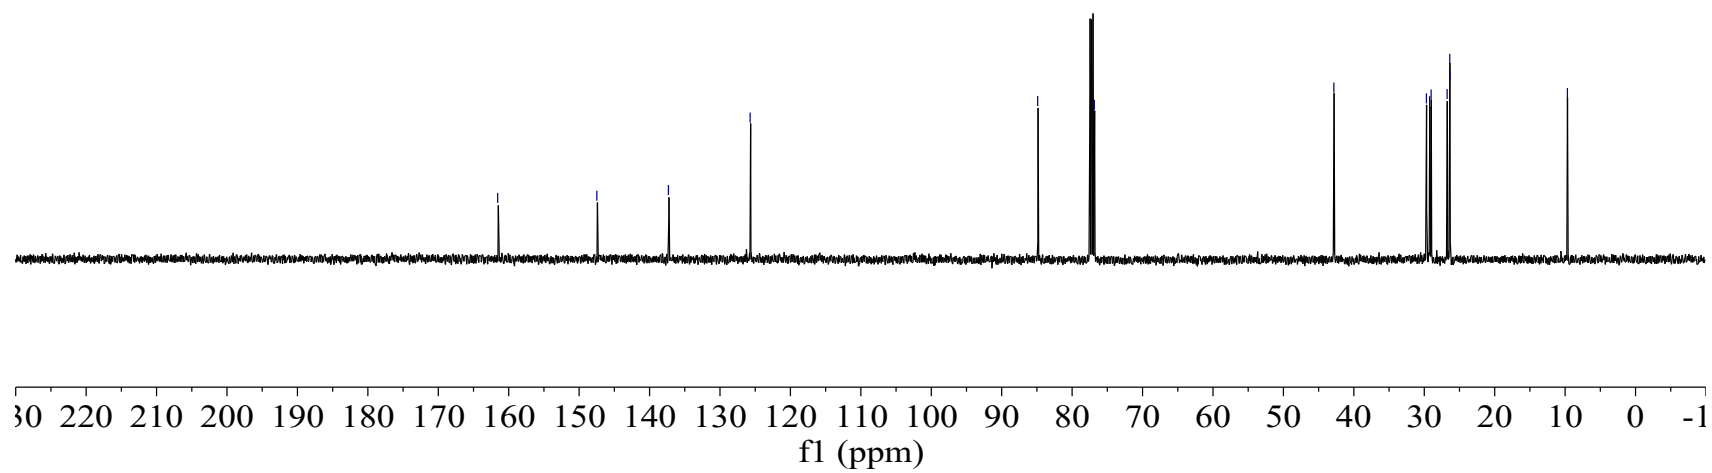

<sup>13</sup>C NMR spectrum of compound **L13**

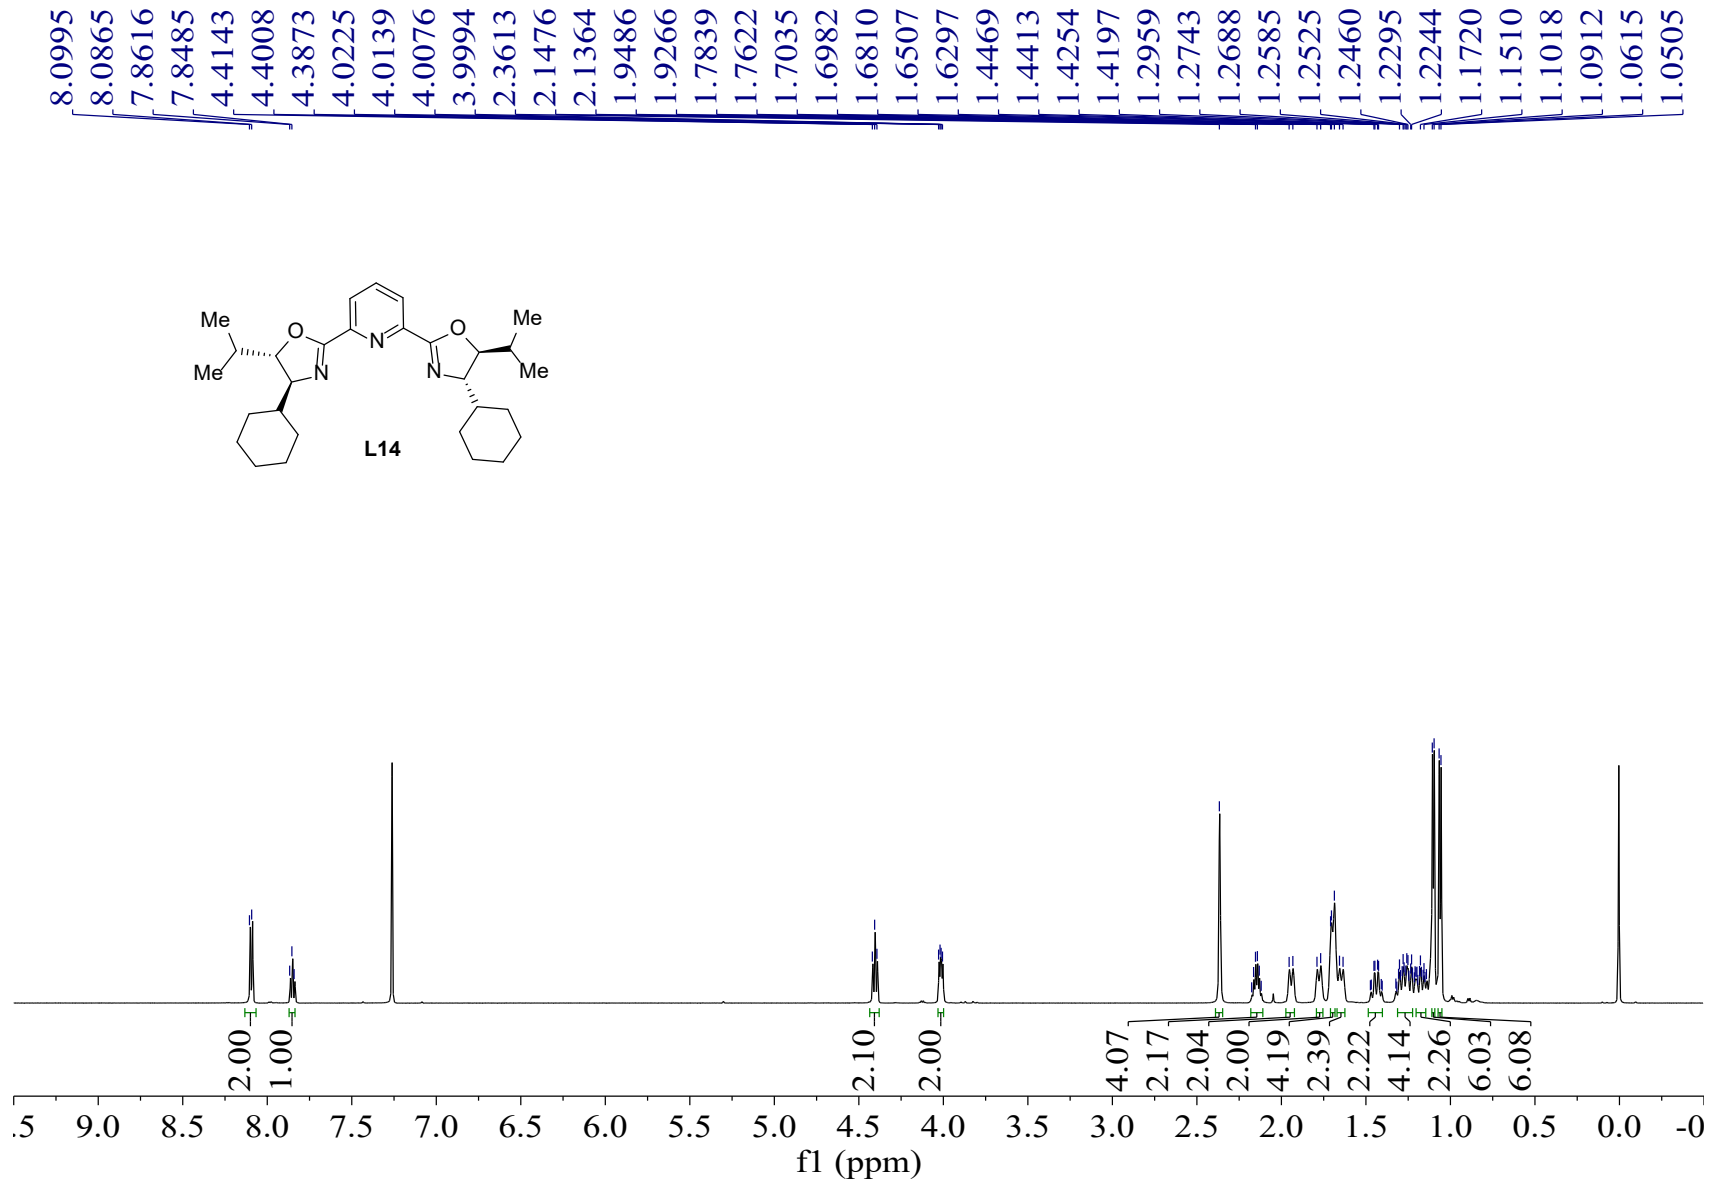

<sup>1</sup>H NMR spectrum of compound L14

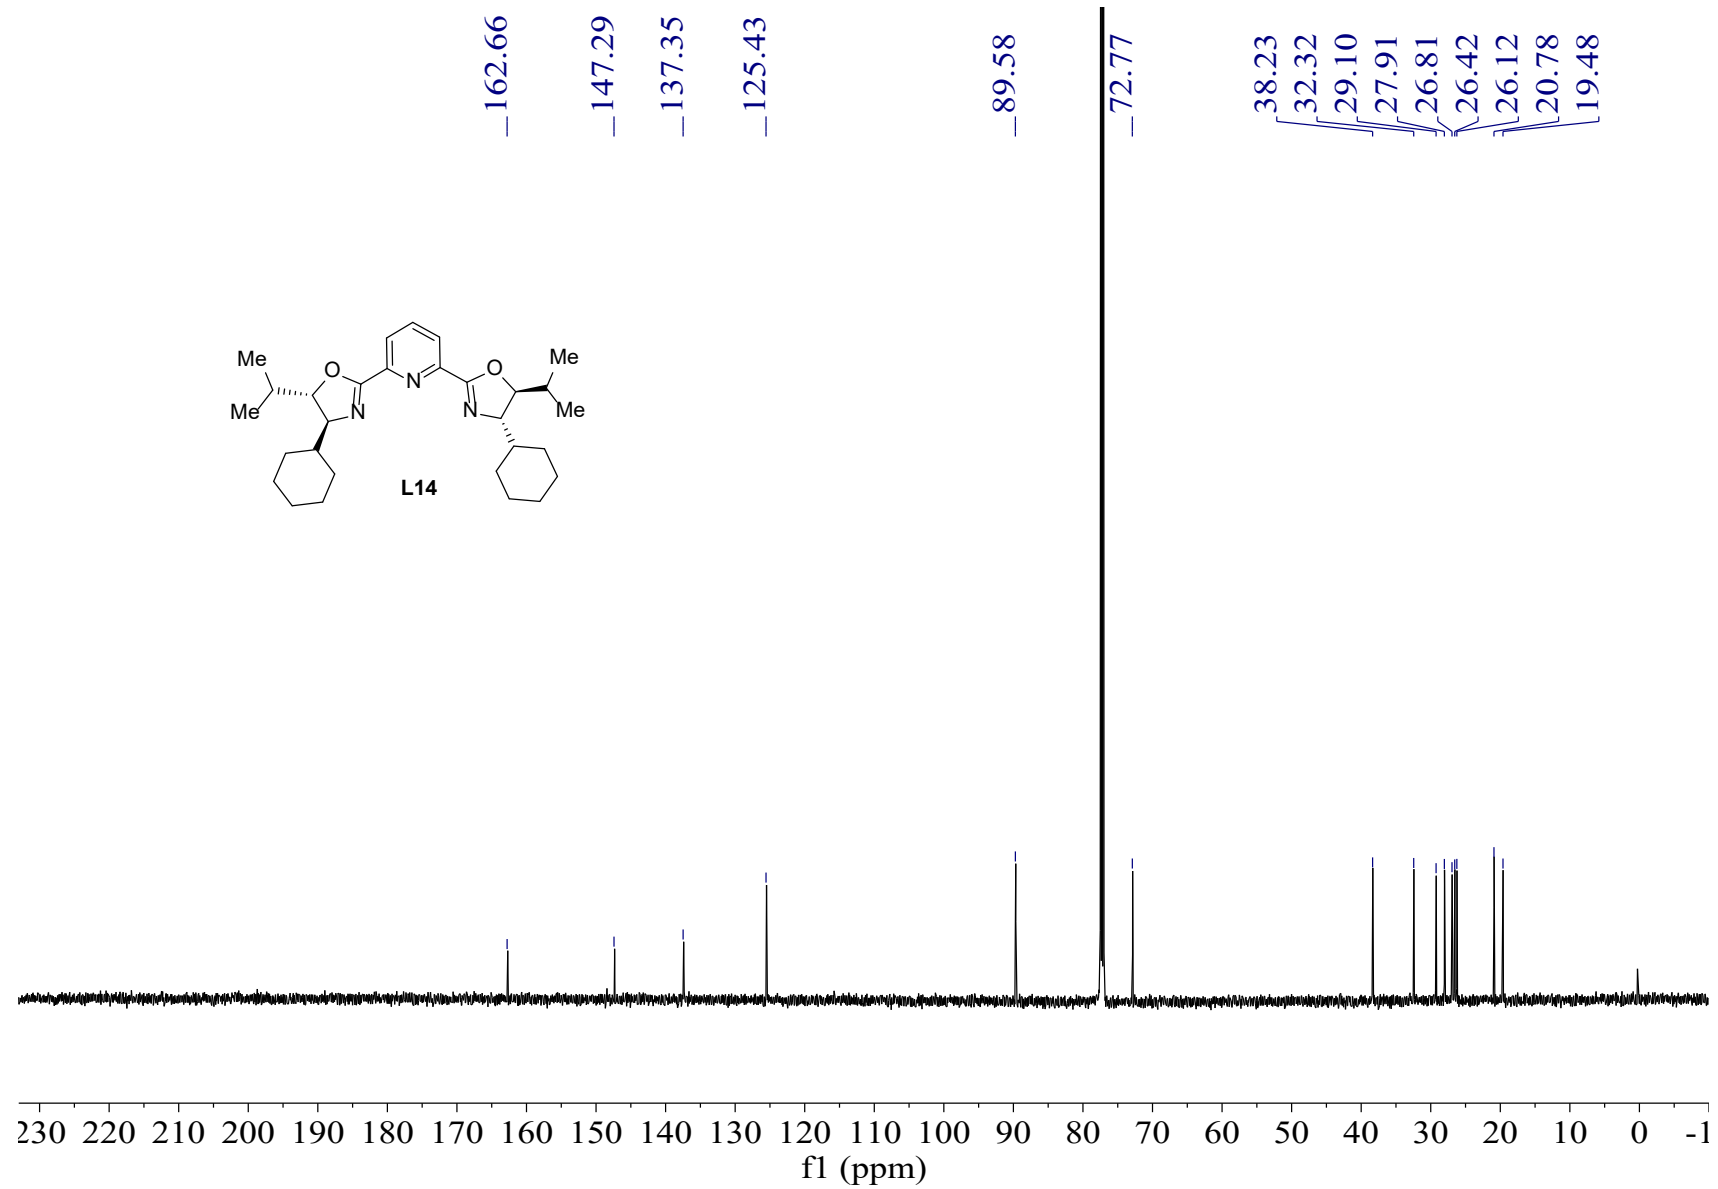

<sup>13</sup>C NMR spectrum of compound L14

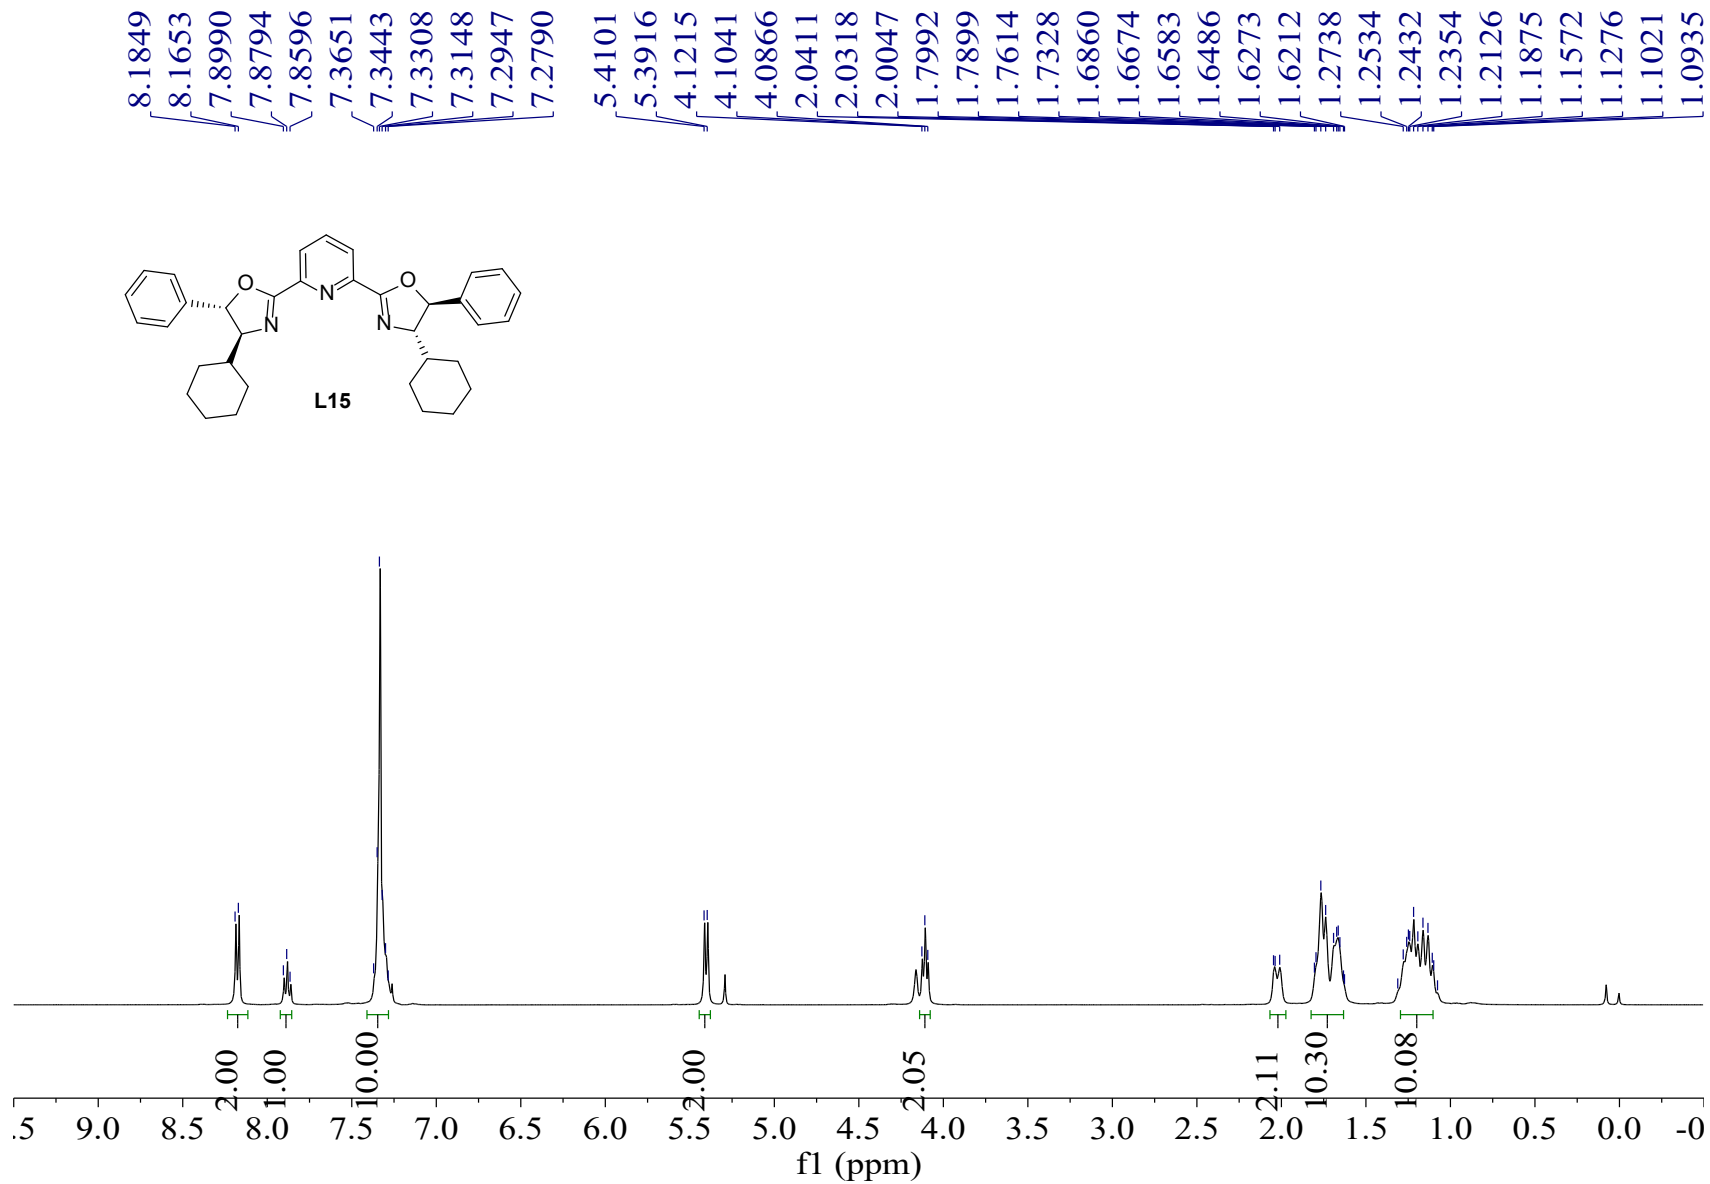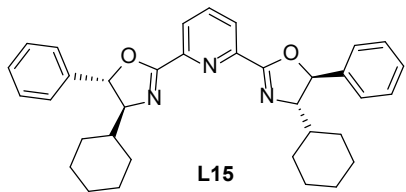

<sup>1</sup>H NMR spectrum of compound L15

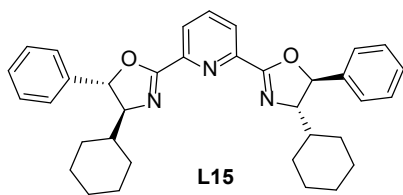

161.28  
147.12  
141.13  
137.42  
128.81  
128.39  
126.52  
125.93

84.98  
80.65

42.98  
29.64  
29.28  
26.56  
26.20  
26.17

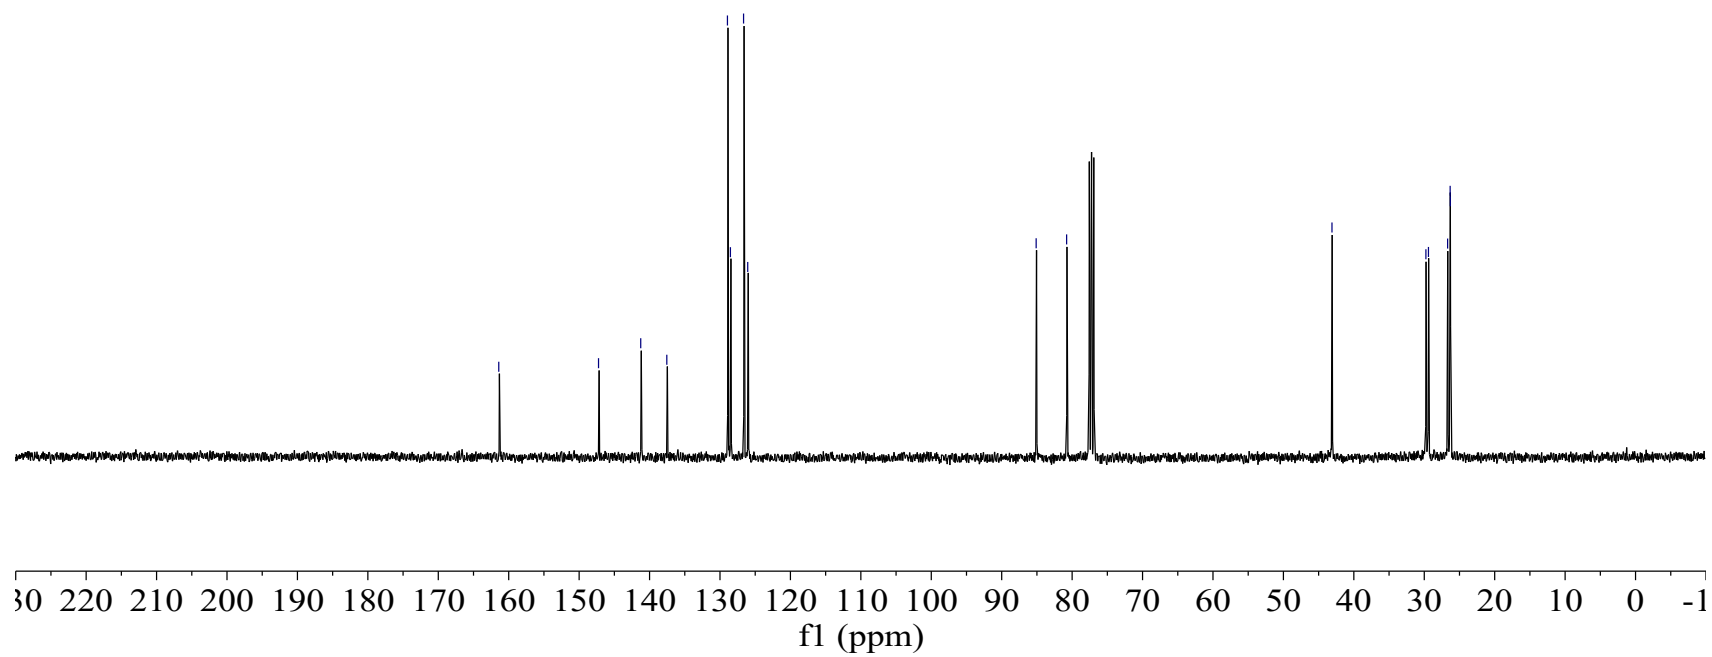

<sup>13</sup>C NMR spectrum of compound **L15**

7.7422  
7.7392  
7.7353  
7.7218  
7.7175  
7.4881  
7.4845  
7.4768  
7.4696  
7.4635  
7.4553  
7.4516  
7.4478  
7.4244  
7.4094  
7.4050  
7.3920  
7.3878  
7.3841

1.2775  
0.8238  
0.8063  
0.8029  
0.7970  
0.7919  
0.7750  
0.7697  
0.7634  
0.7431

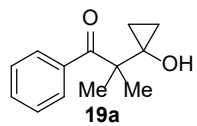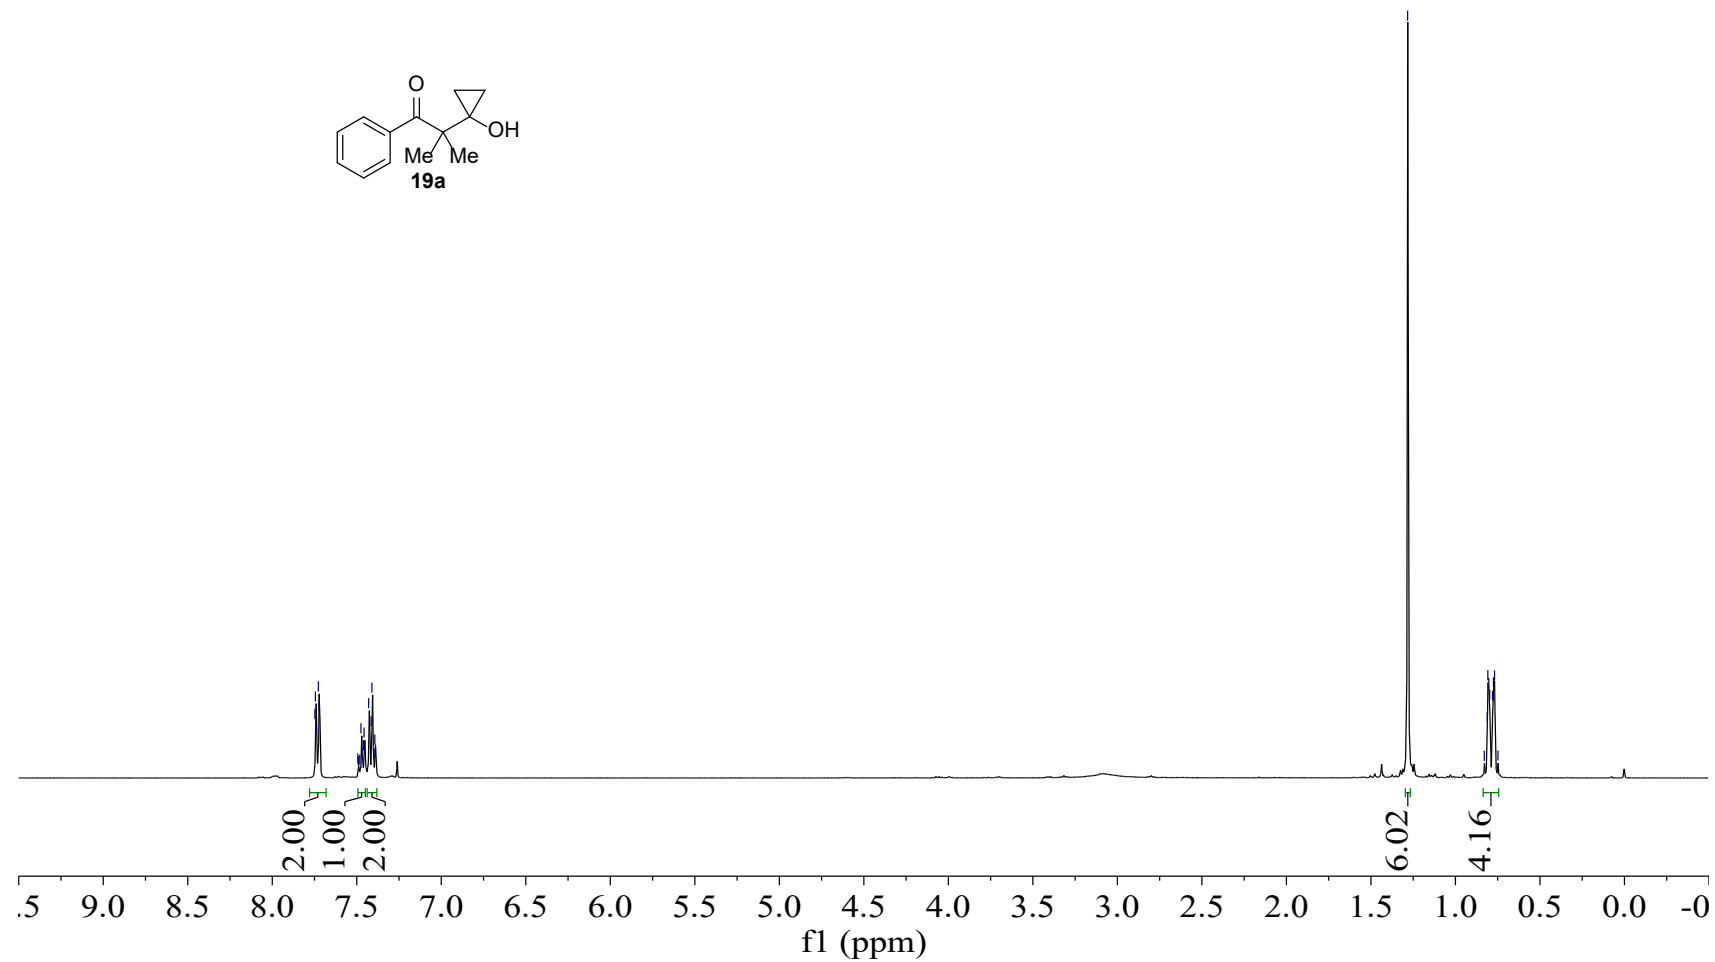

<sup>1</sup>H NMR spectrum of compound **19a**

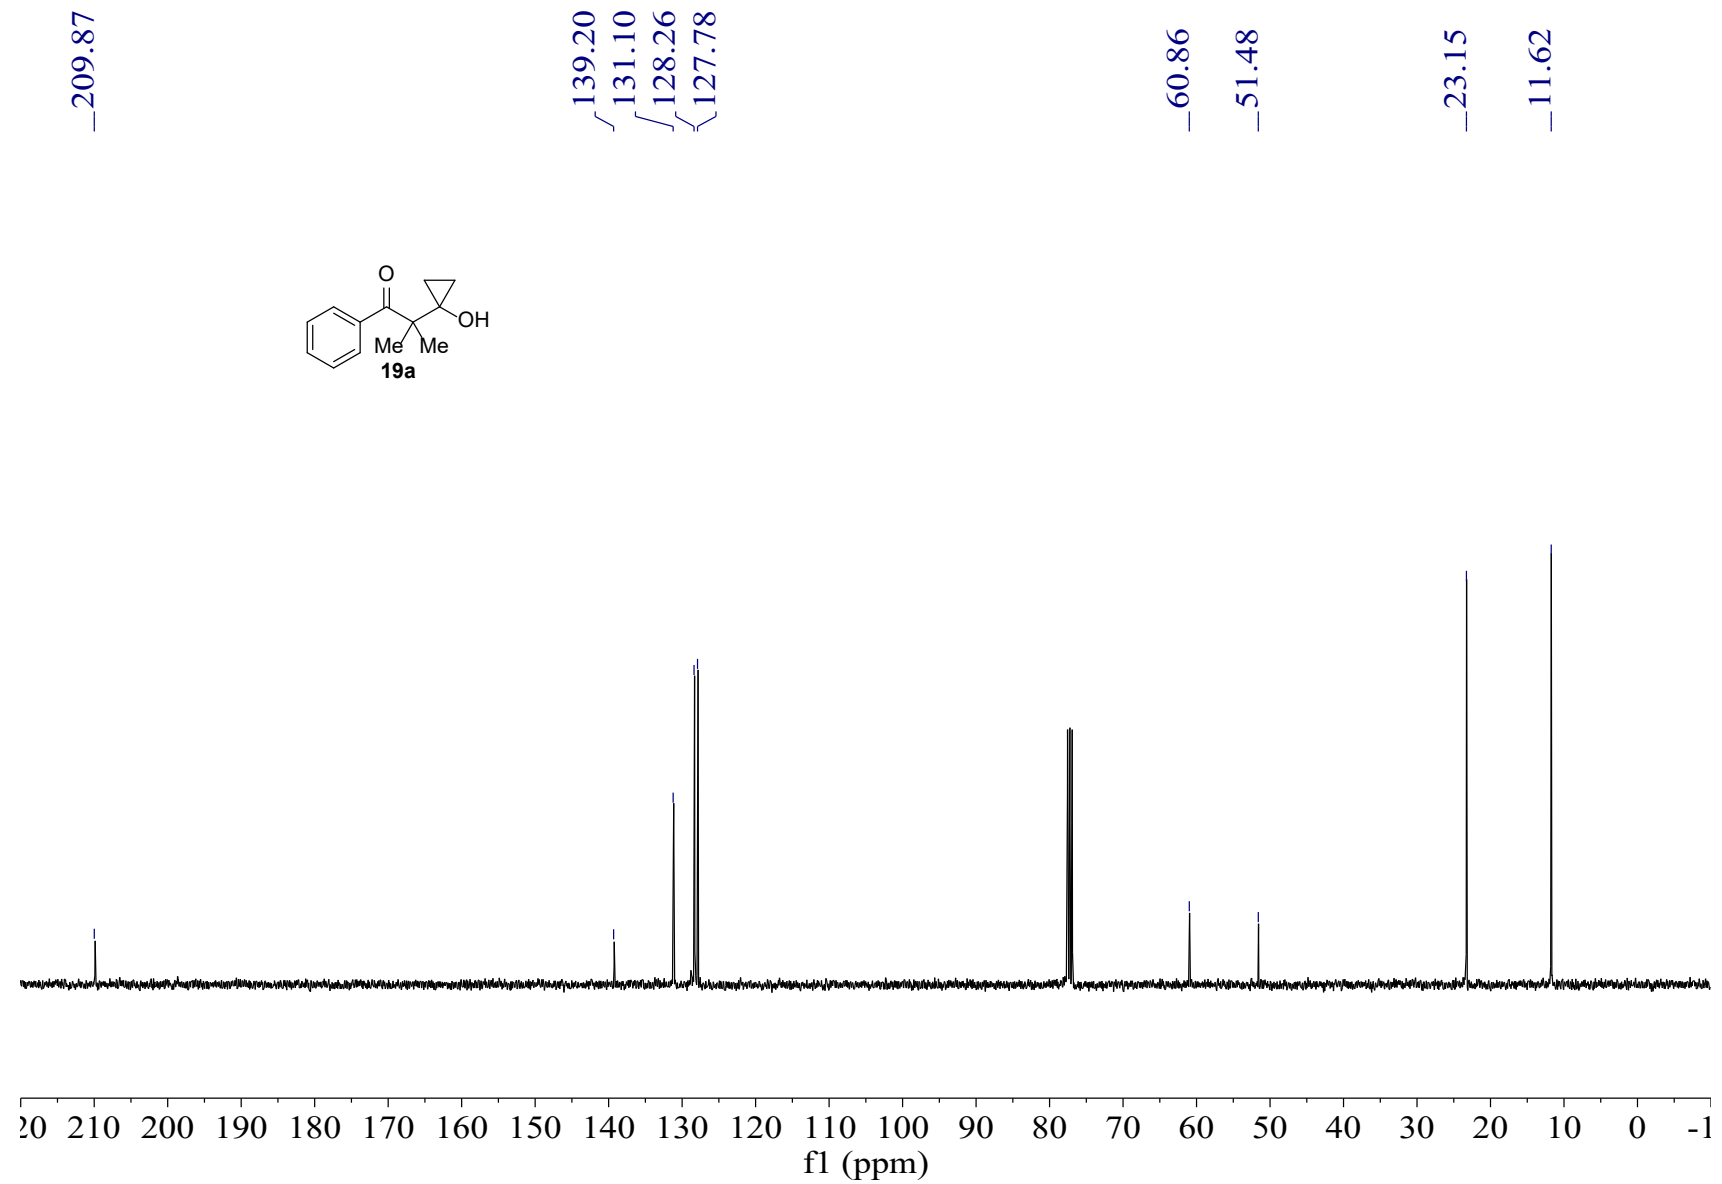

$^{13}\text{C}$  NMR spectrum of compound **19a**

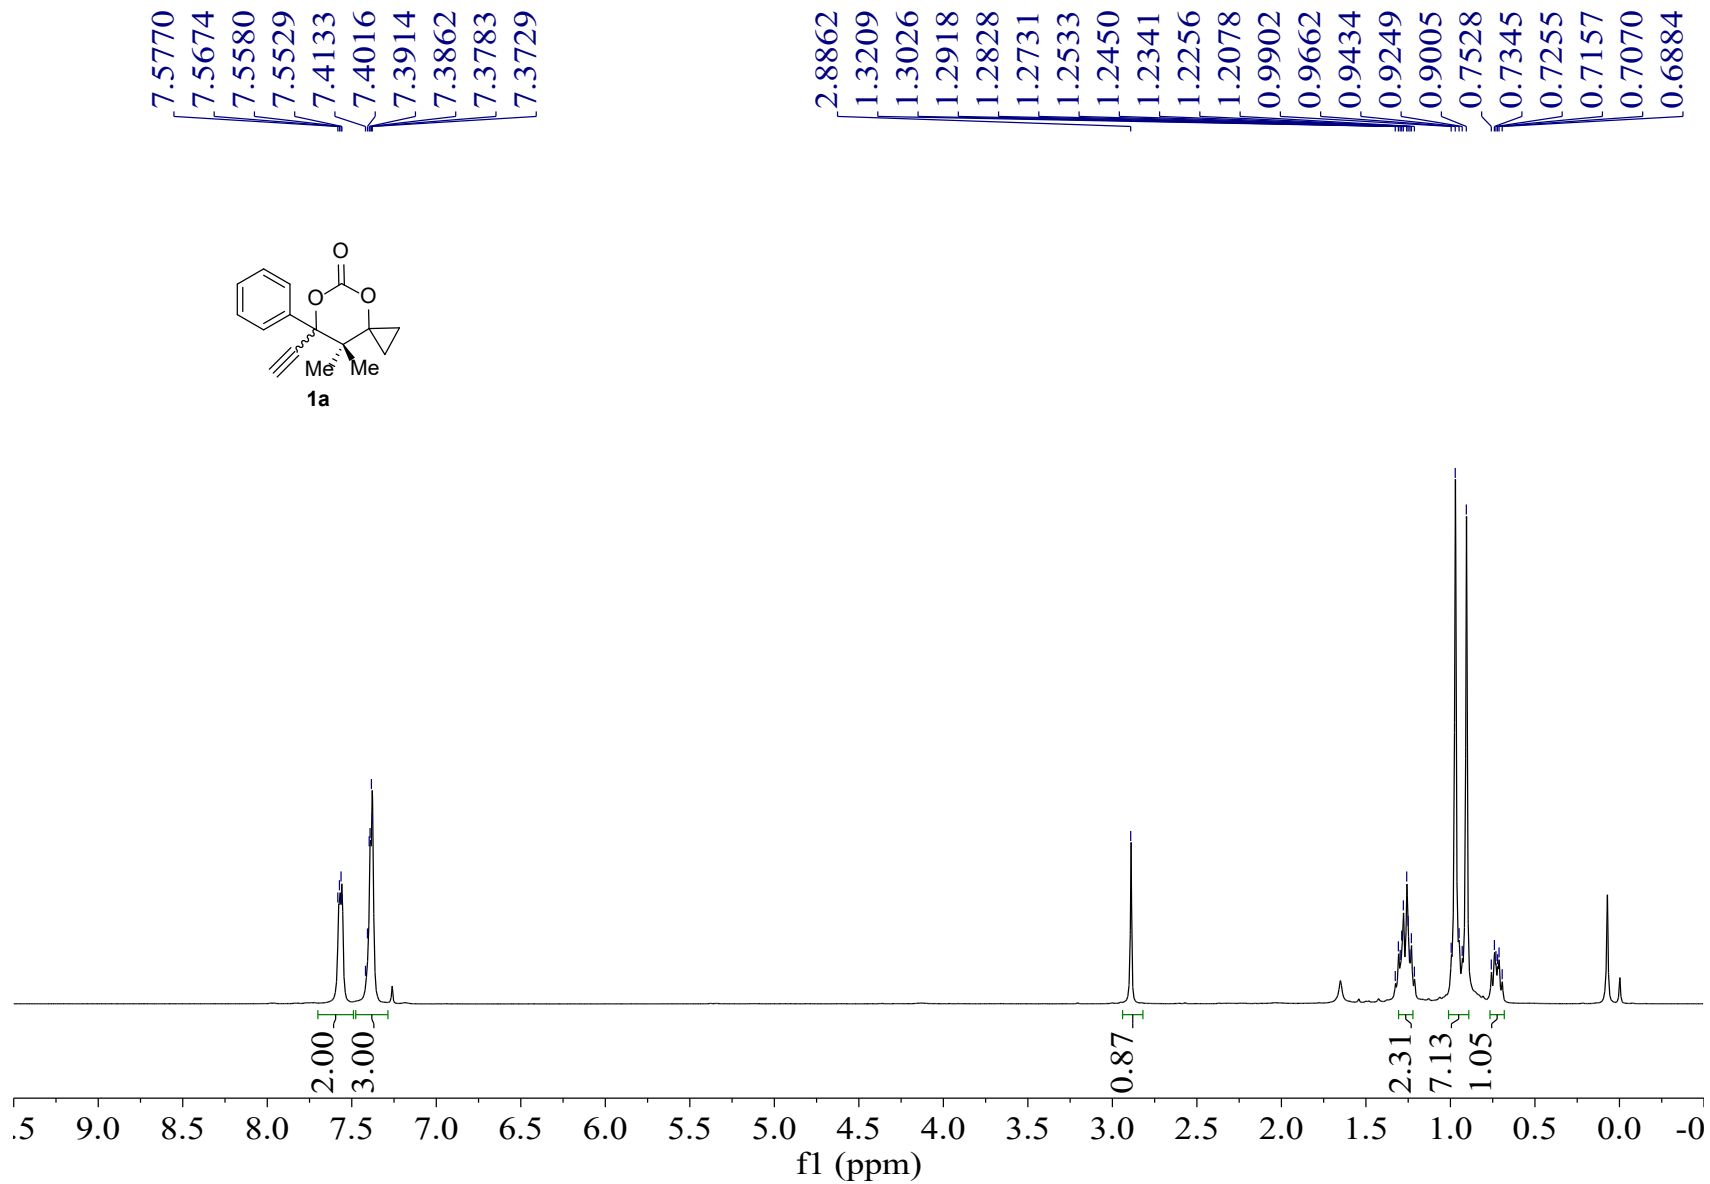

<sup>1</sup>H NMR spectrum of compound **1a**



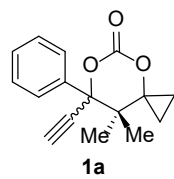

148.38  
135.99  
128.95  
127.79  
127.34

86.28  
81.13  
78.25  
70.25

38.03

19.81  
19.64  
12.22  
7.48

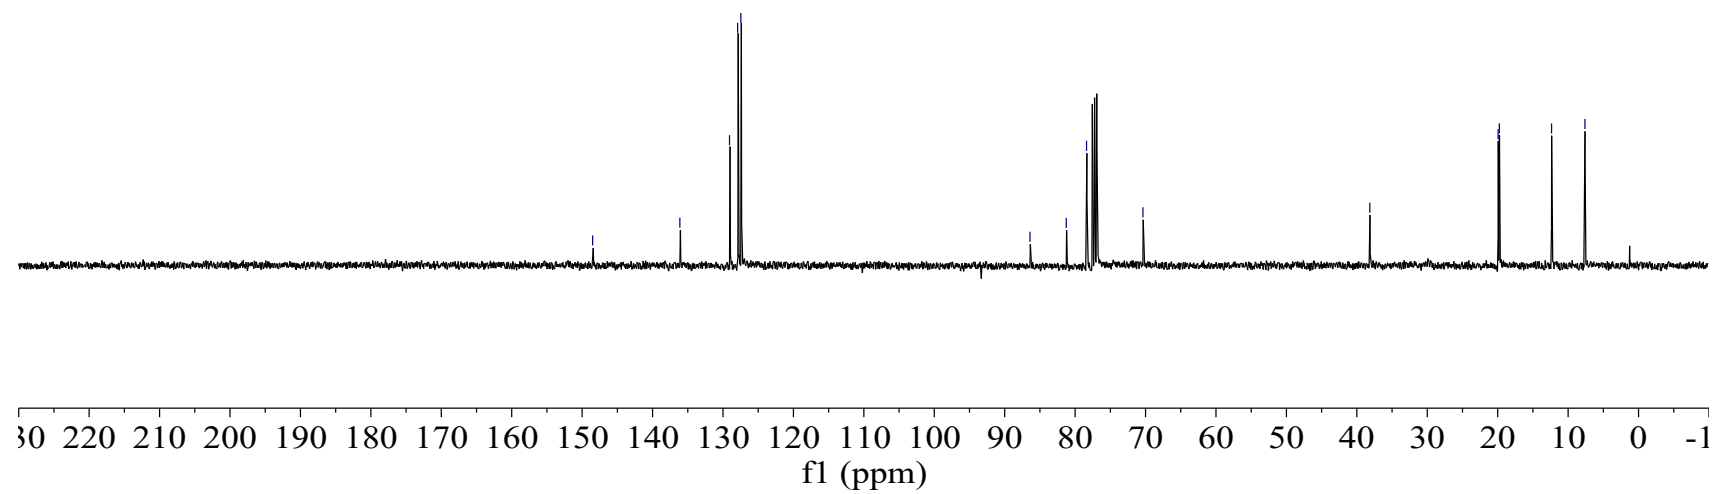

<sup>13</sup>C NMR spectrum of compound **1a**

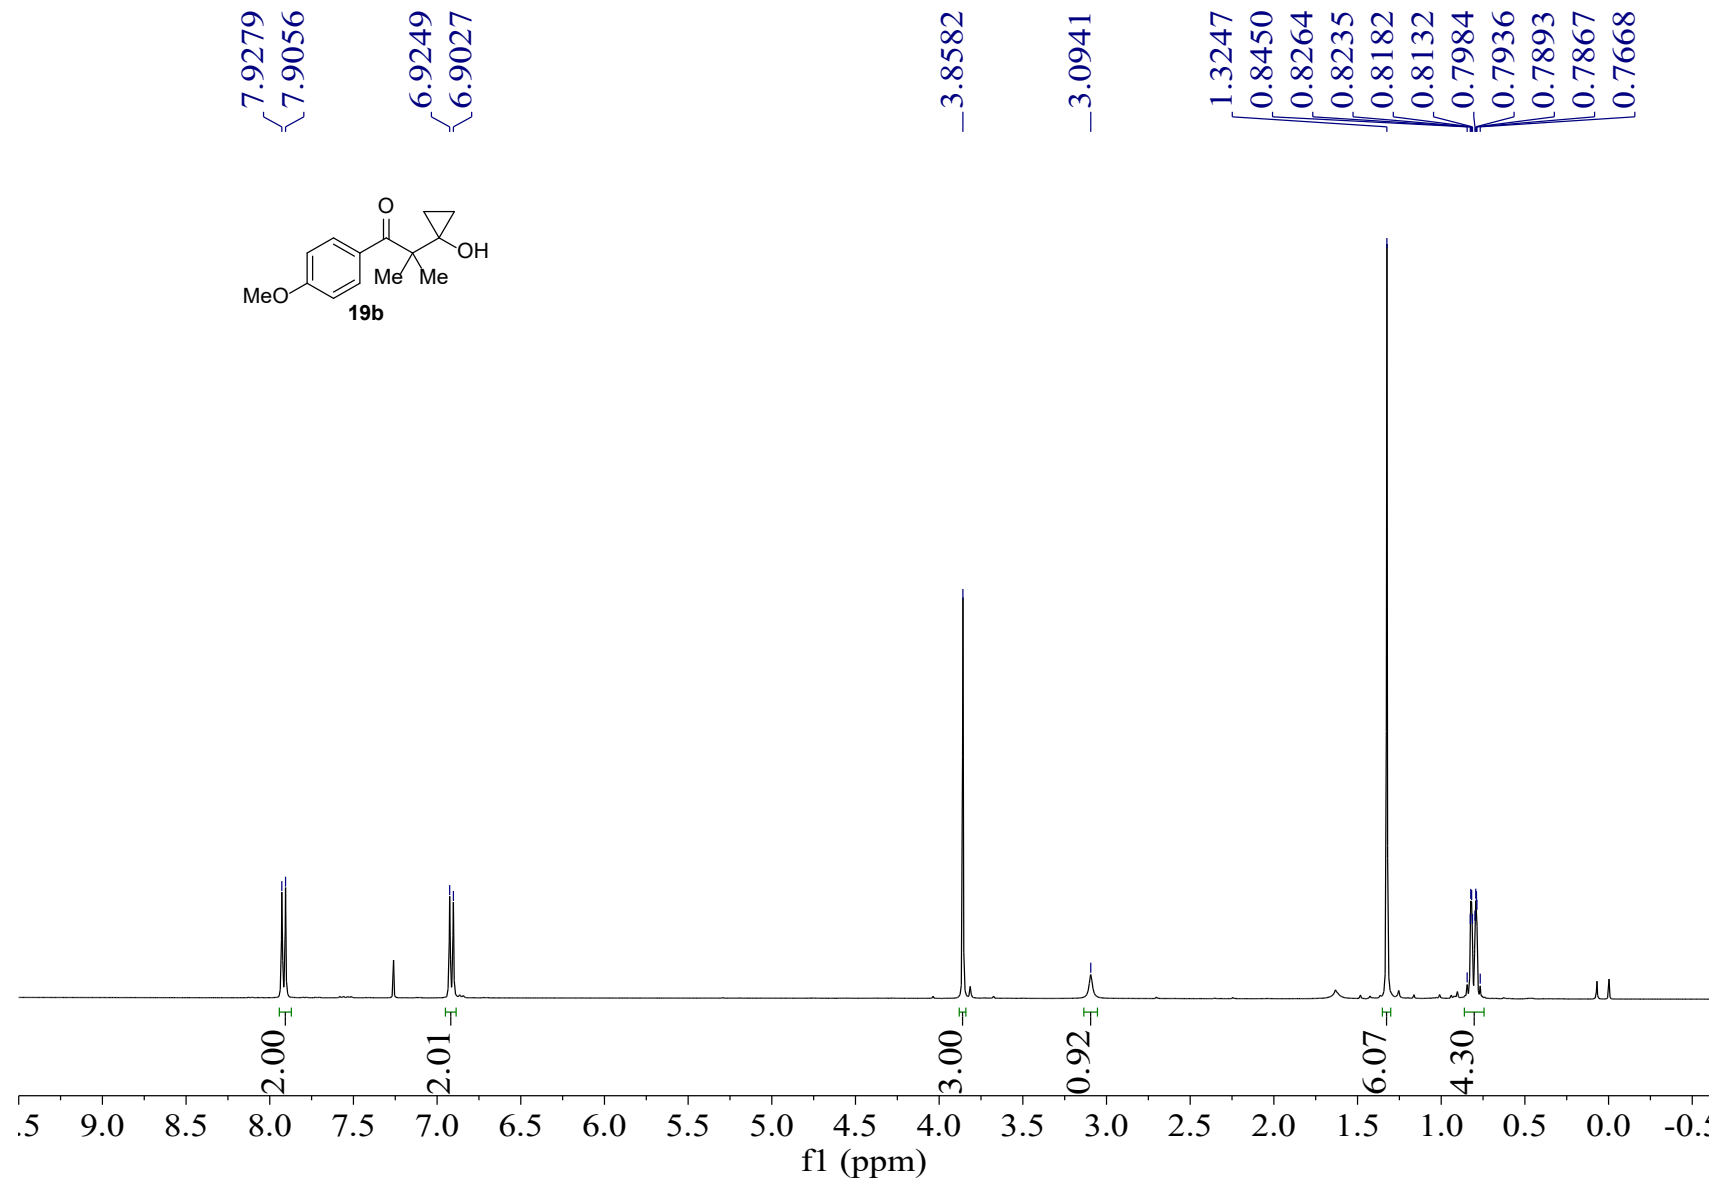

<sup>1</sup>H NMR spectrum of compound **19b**

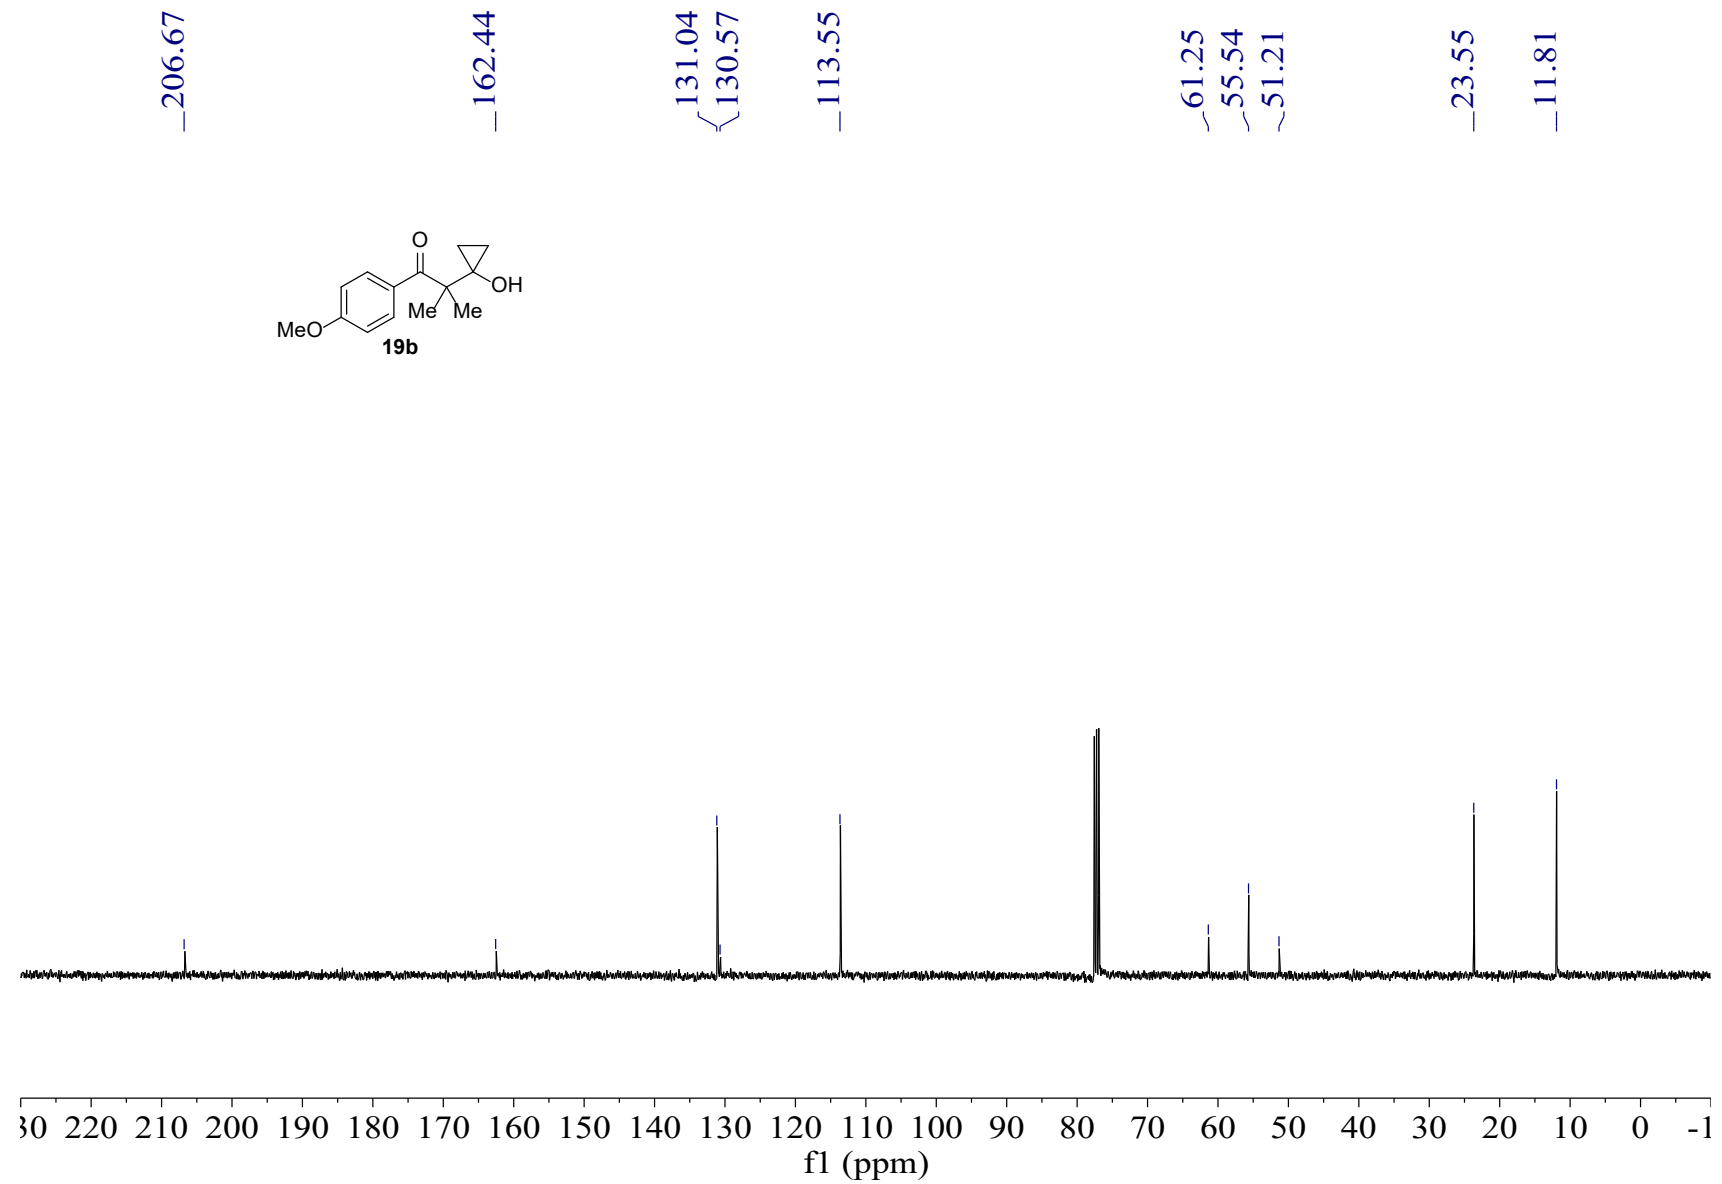

<sup>13</sup>C NMR spectrum of compound **19b**

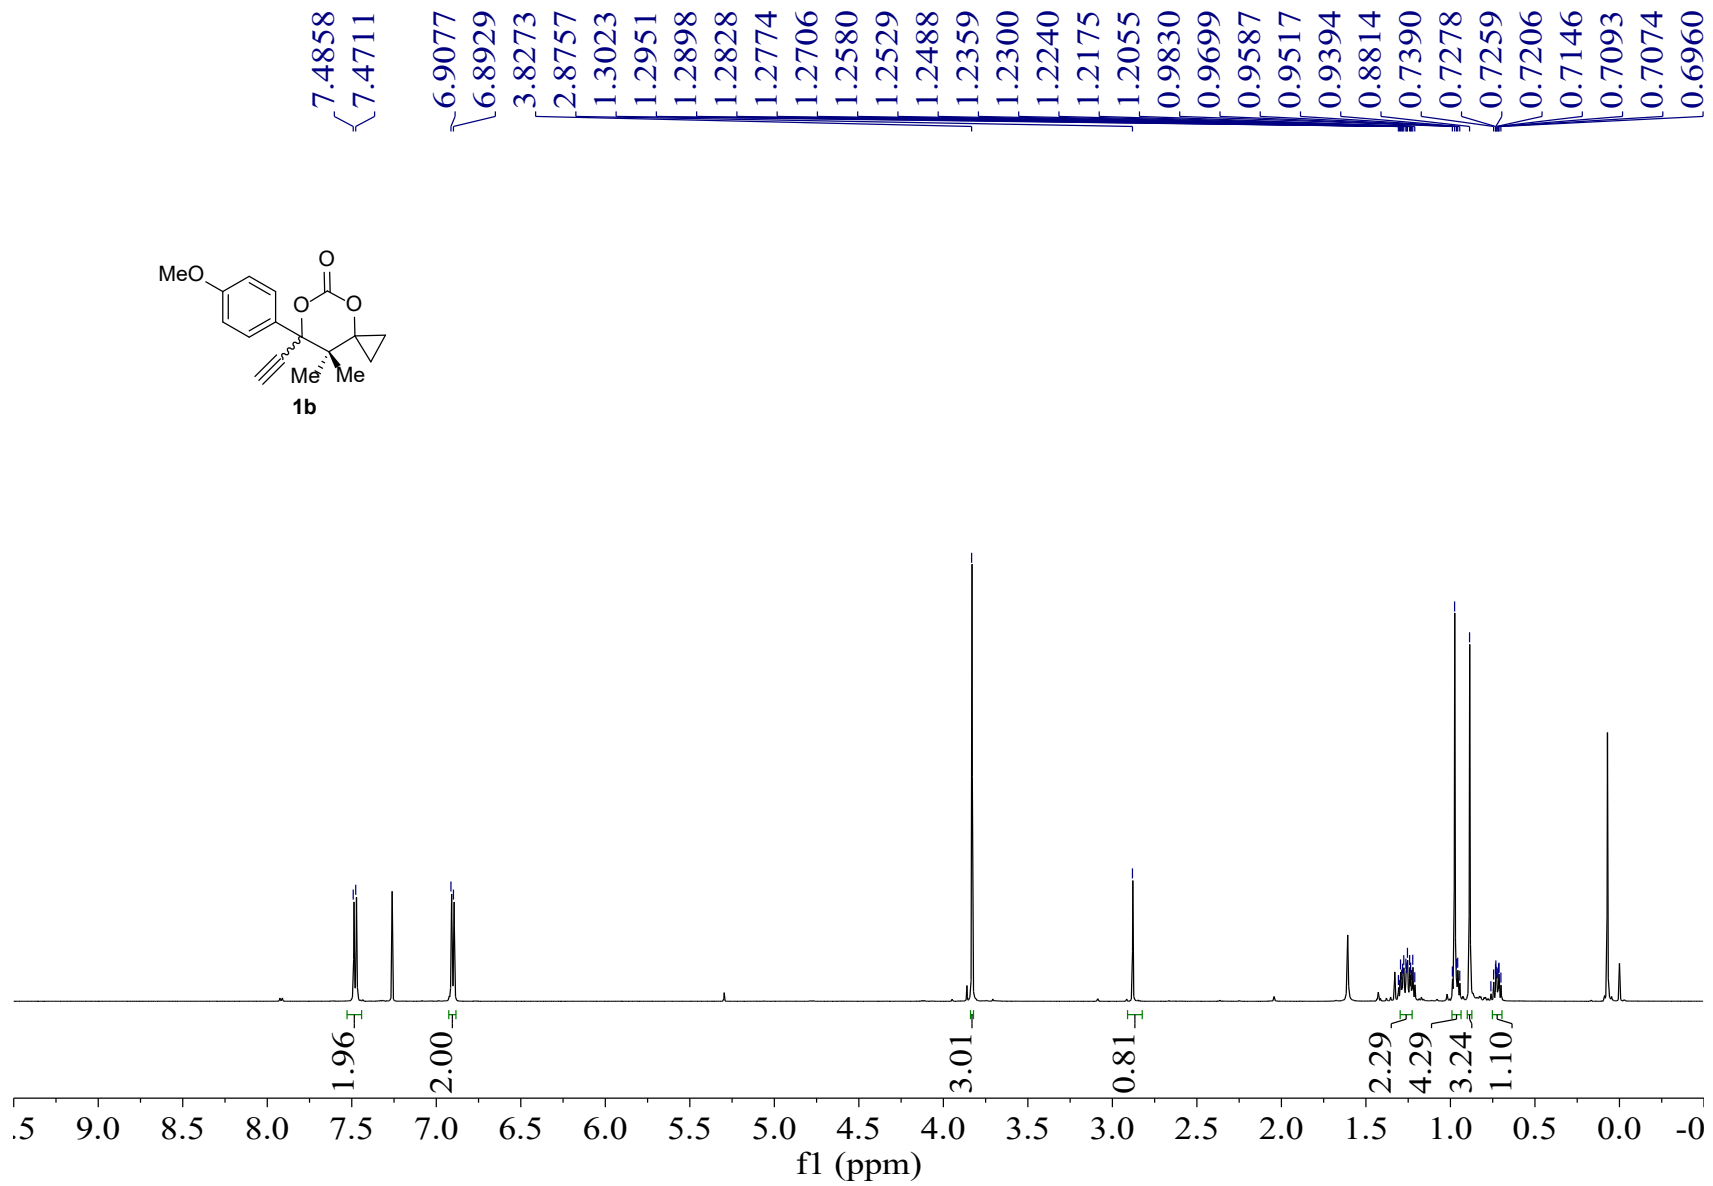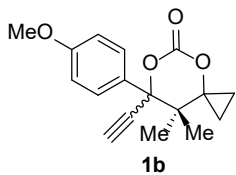

<sup>1</sup>H NMR spectrum of compound **1b**

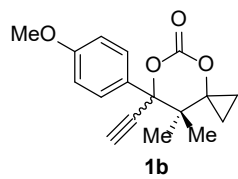

-160.02  
 -148.53  
 { 128.69  
 { 128.09  
 -113.13  
 ~ 86.19  
 ~ 81.31  
 ~ 78.13  
 ~ 70.23  
 -55.48  
 -38.19  
 { 19.84  
 { 19.62  
 ~ 12.23  
 ~ 7.52

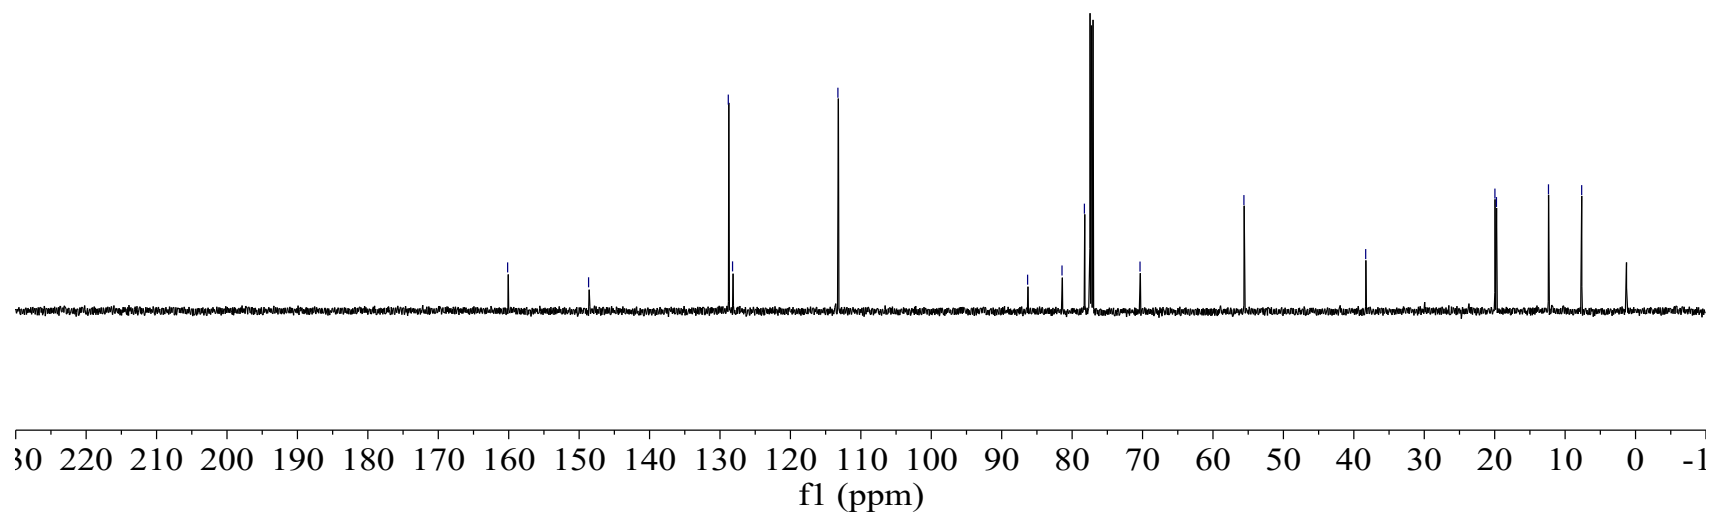

<sup>13</sup>C NMR spectrum of compound **1b**

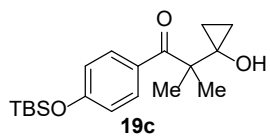

7.8365  
7.8158

6.8457  
6.8248

3.2173

1.2915  
0.9763  
0.8194  
0.7977  
0.7905  
0.7714  
0.7662  
0.7616  
0.7410  
0.2186

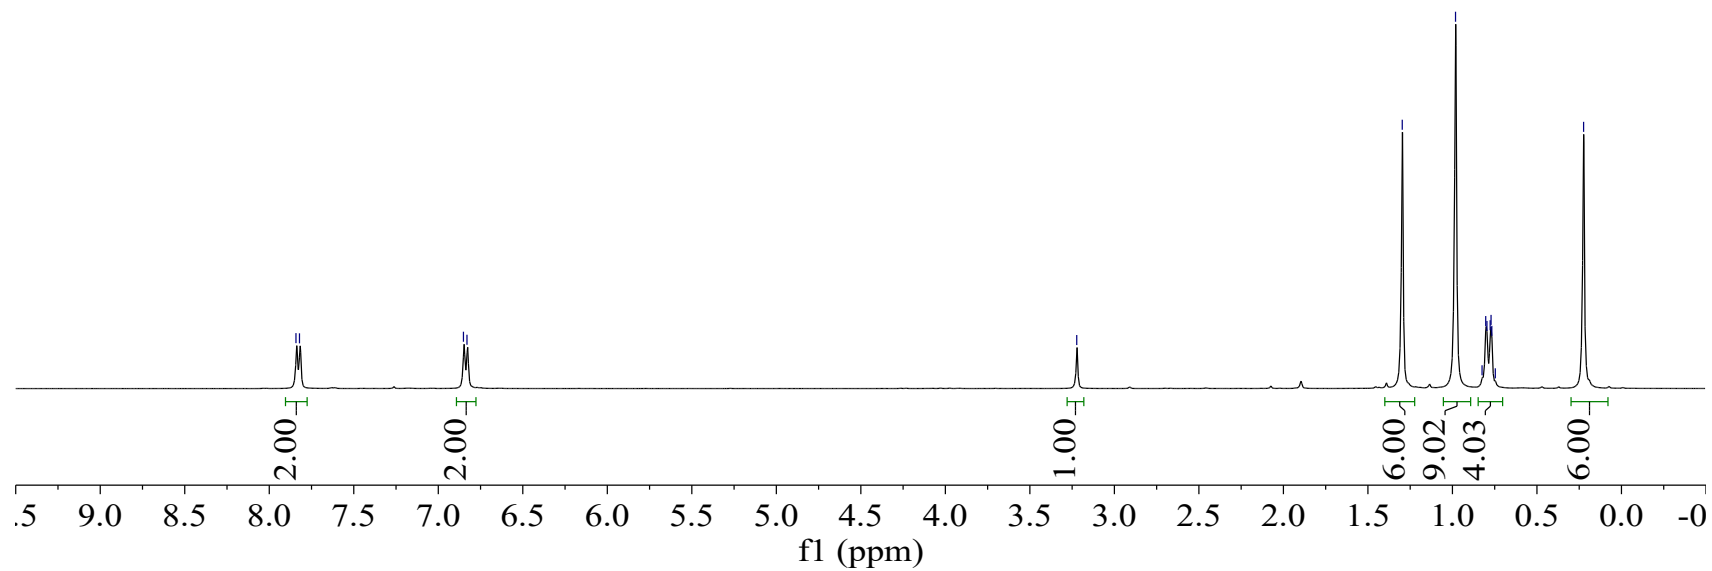

<sup>1</sup>H NMR spectrum of compound **19c**

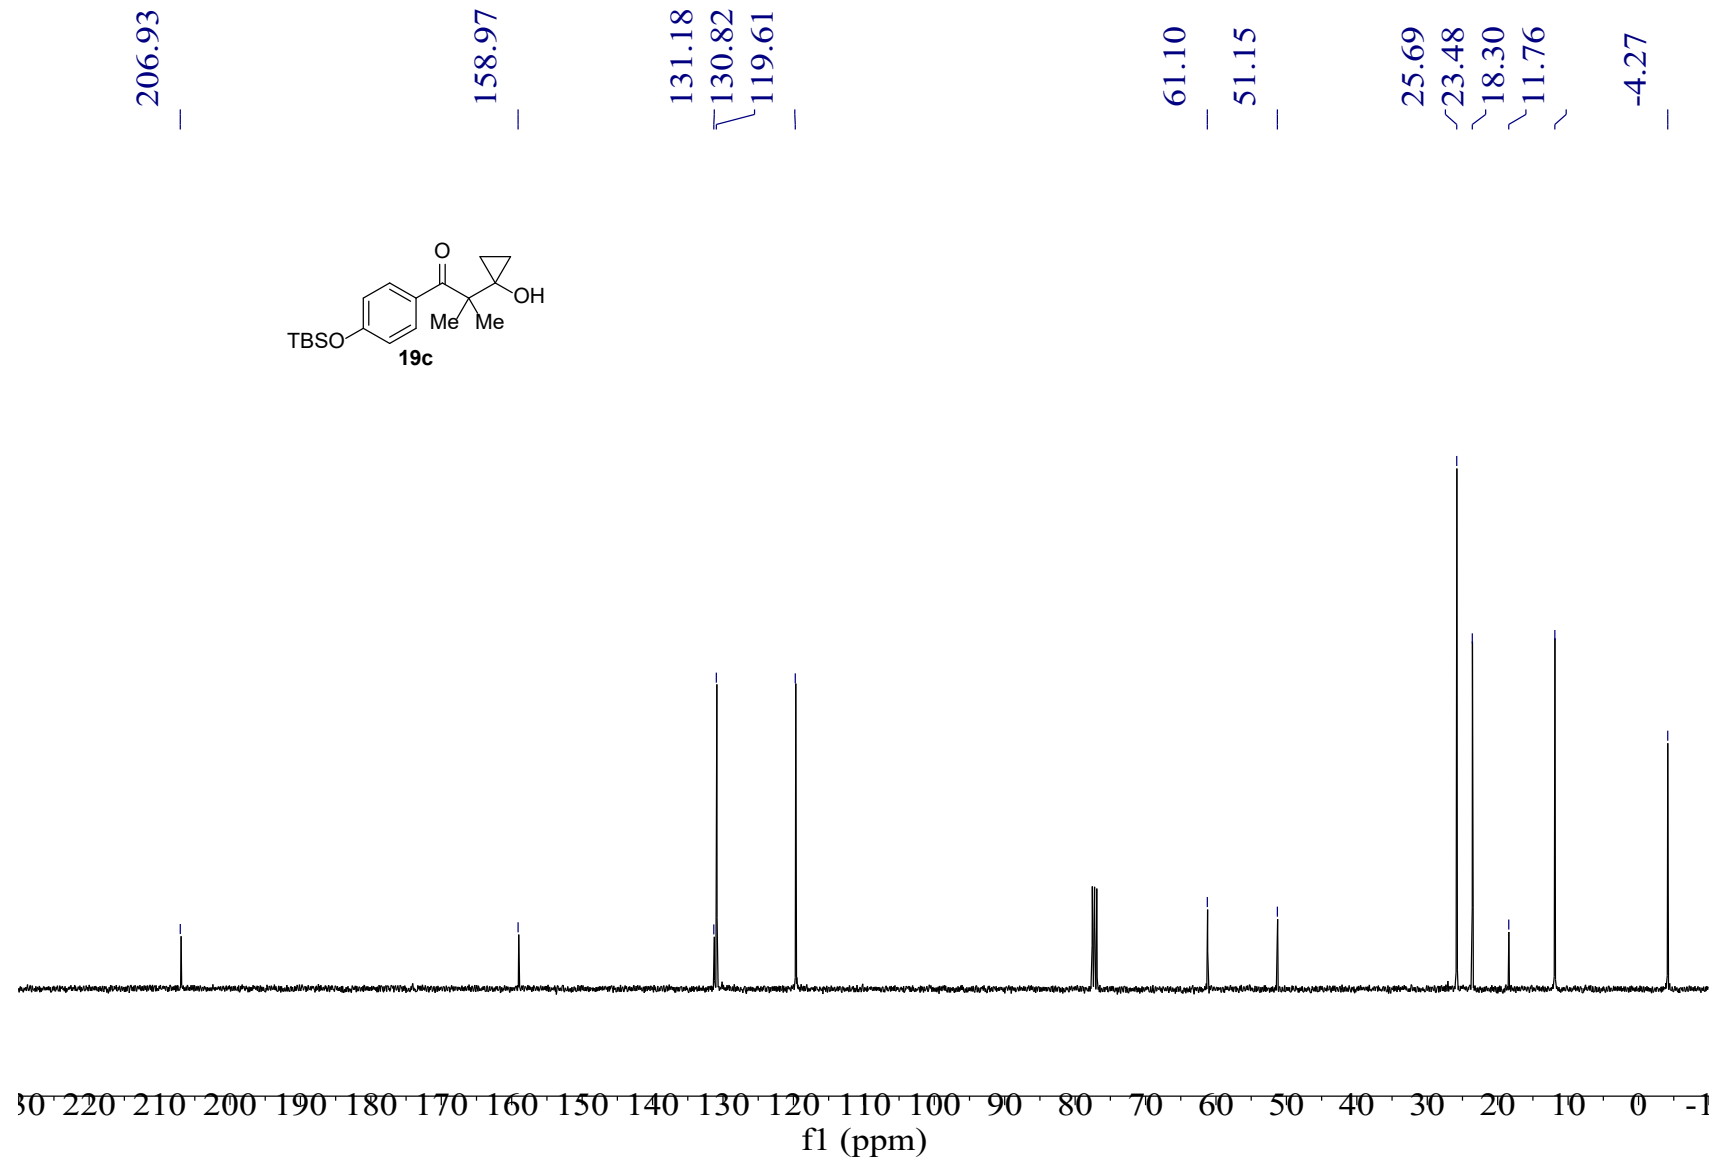

$^{13}\text{C}$  NMR spectrum of compound **19c**

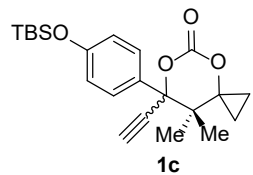

7.4098  
7.3880  
6.8306  
6.8089

2.8699  
1.2791  
1.2608  
1.2504  
1.2418  
1.2333  
1.2142  
1.2073  
1.1980  
1.1885  
1.1707  
0.9658  
0.9404  
0.9230  
0.9125  
0.8939  
0.8573  
0.7261  
0.7094  
0.7059  
0.6990  
0.6892  
0.6818  
0.6785  
0.6617

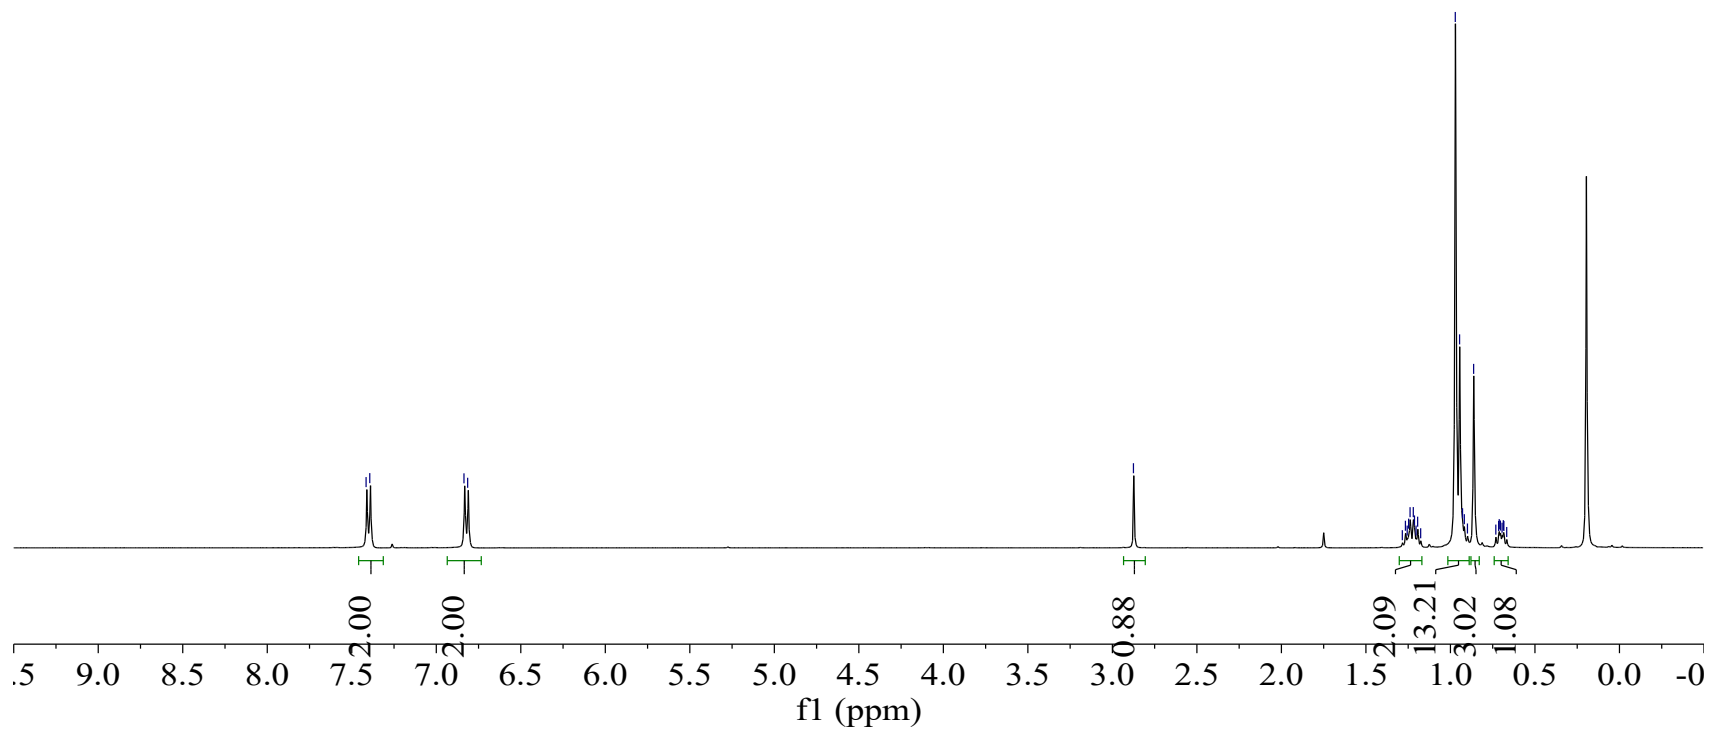

<sup>1</sup>H NMR spectrum of compound **1c**



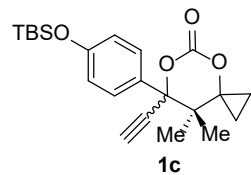

156.21

148.42

128.60

119.19

86.18

81.20

78.13

70.16

38.07

25.71

19.78

19.55

18.26

12.13

7.47

-4.34

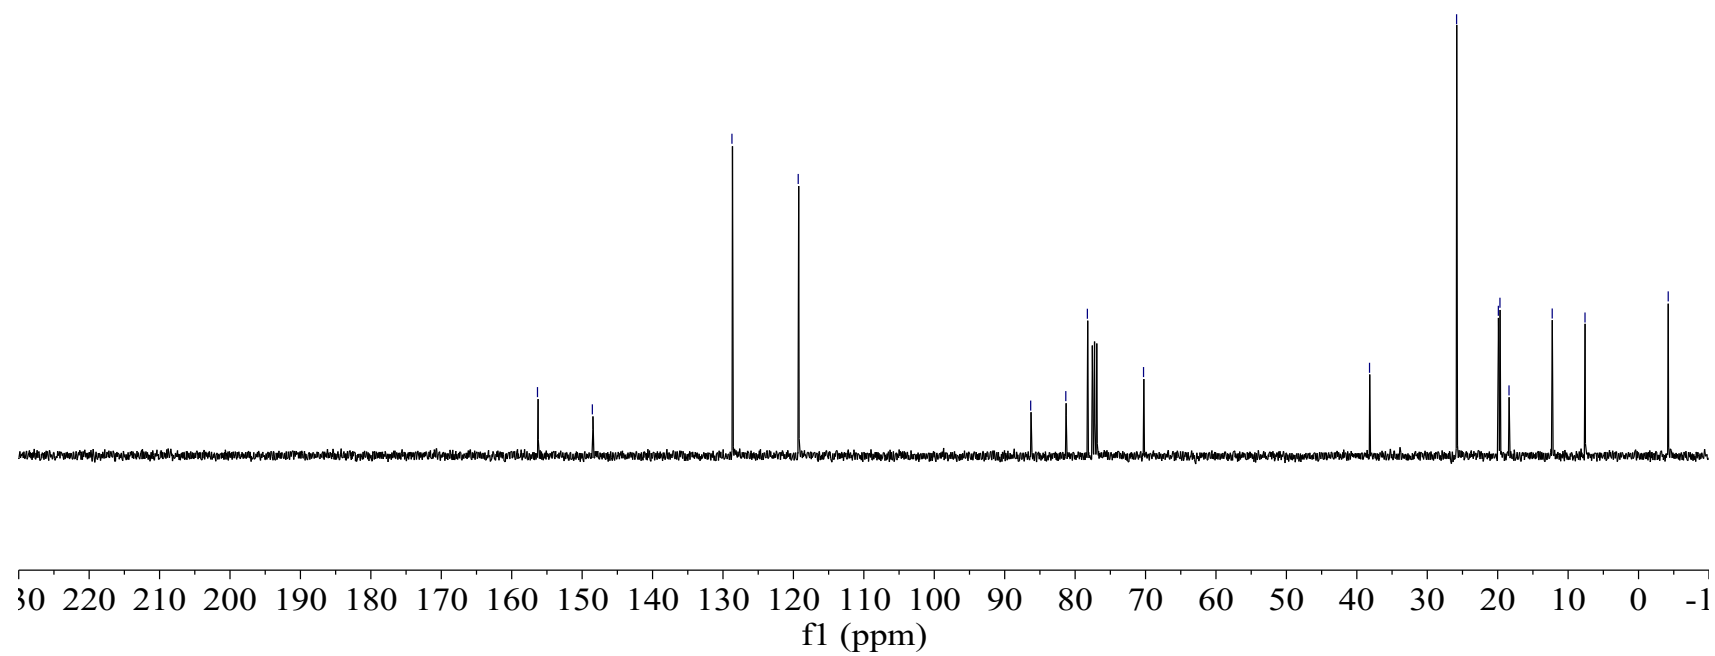

<sup>13</sup>C NMR spectrum of compound **1c**

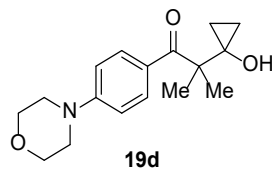

7.9202  
7.8988

6.8231  
6.8015

3.8096  
3.7976  
3.7852  
3.4065  
3.2460  
3.2338  
3.2216

1.2845  
0.8013  
0.7799  
0.7735  
0.7603  
0.7537  
0.7317

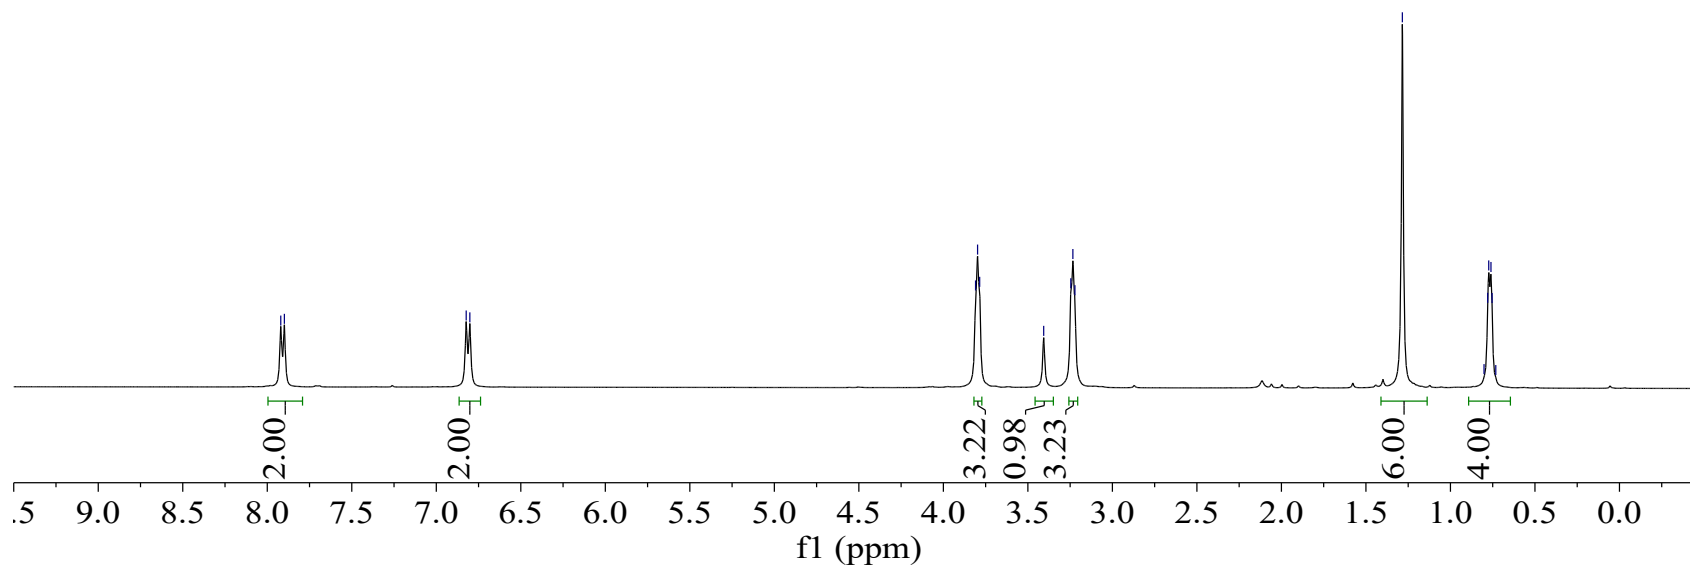

<sup>1</sup>H NMR spectrum of compound **19d**

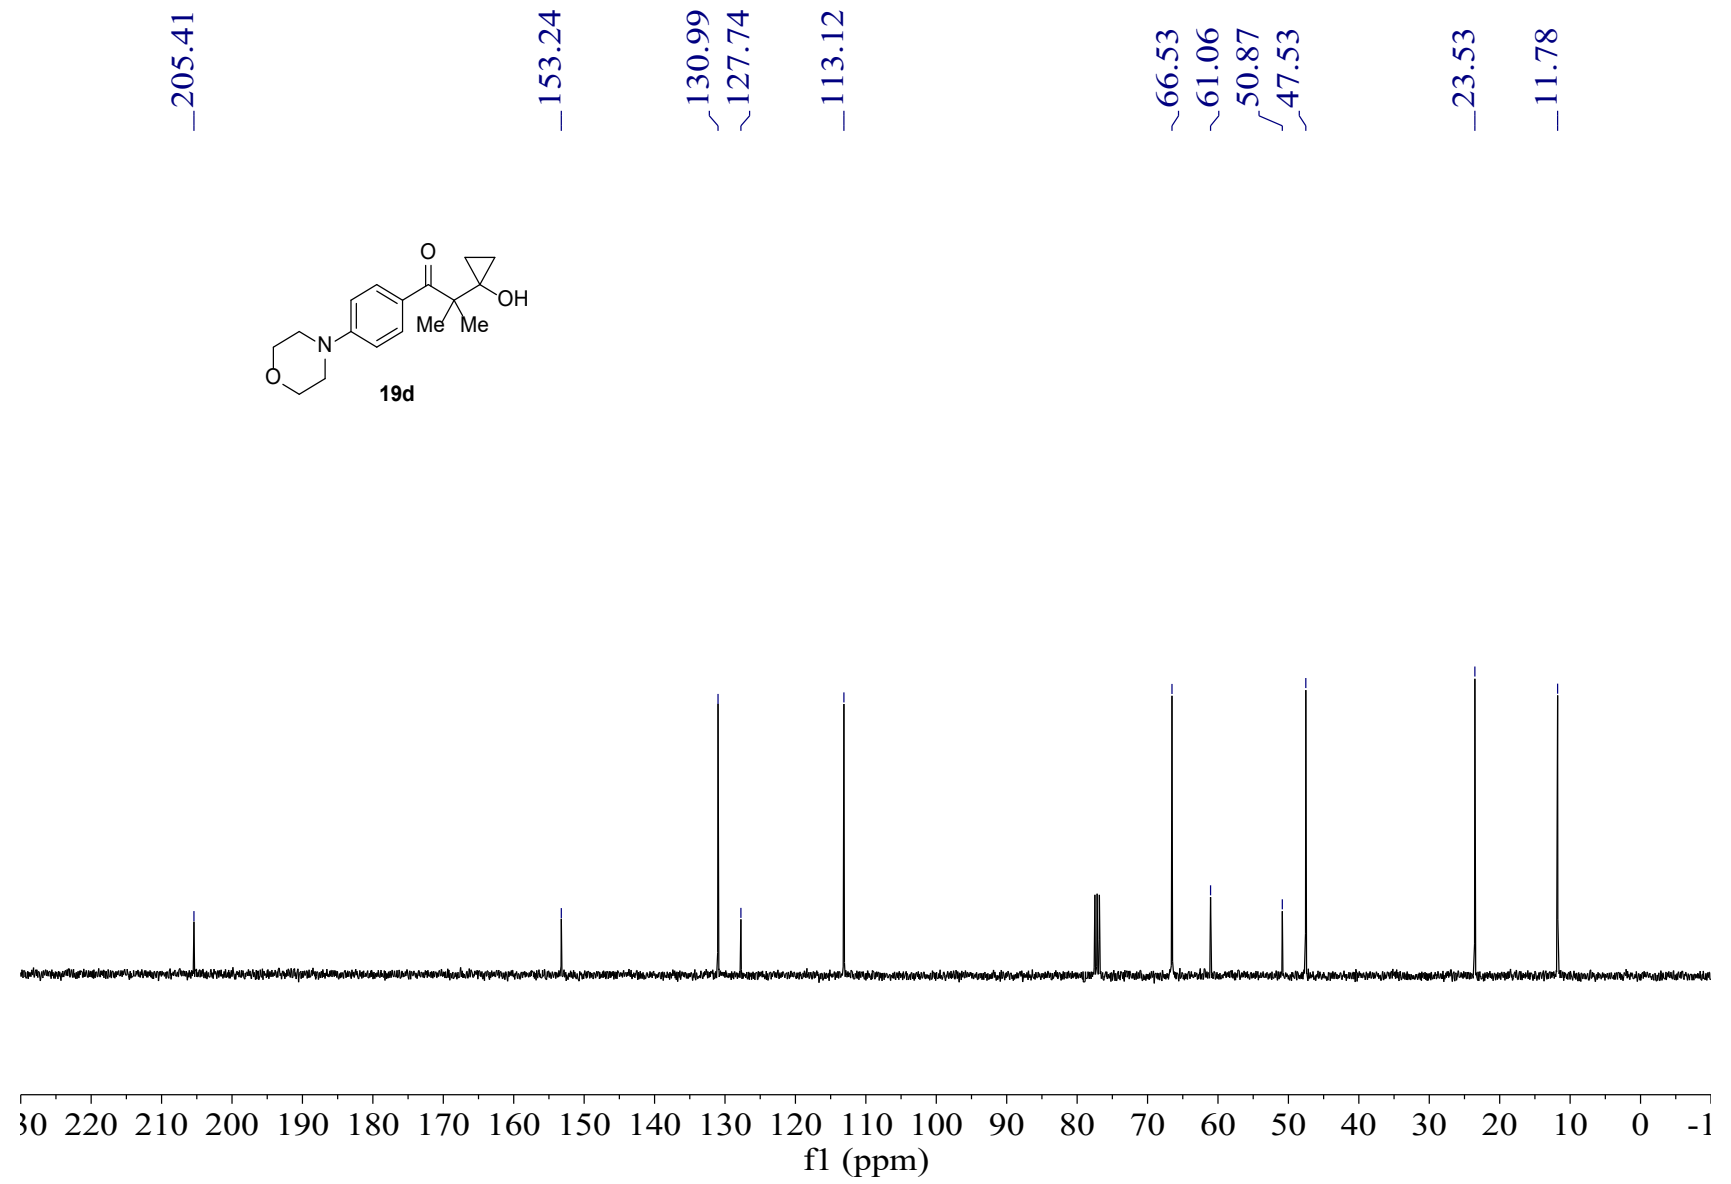

<sup>13</sup>C NMR spectrum of compound **19d**

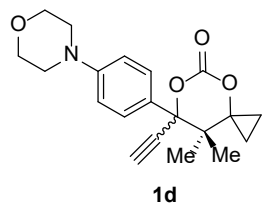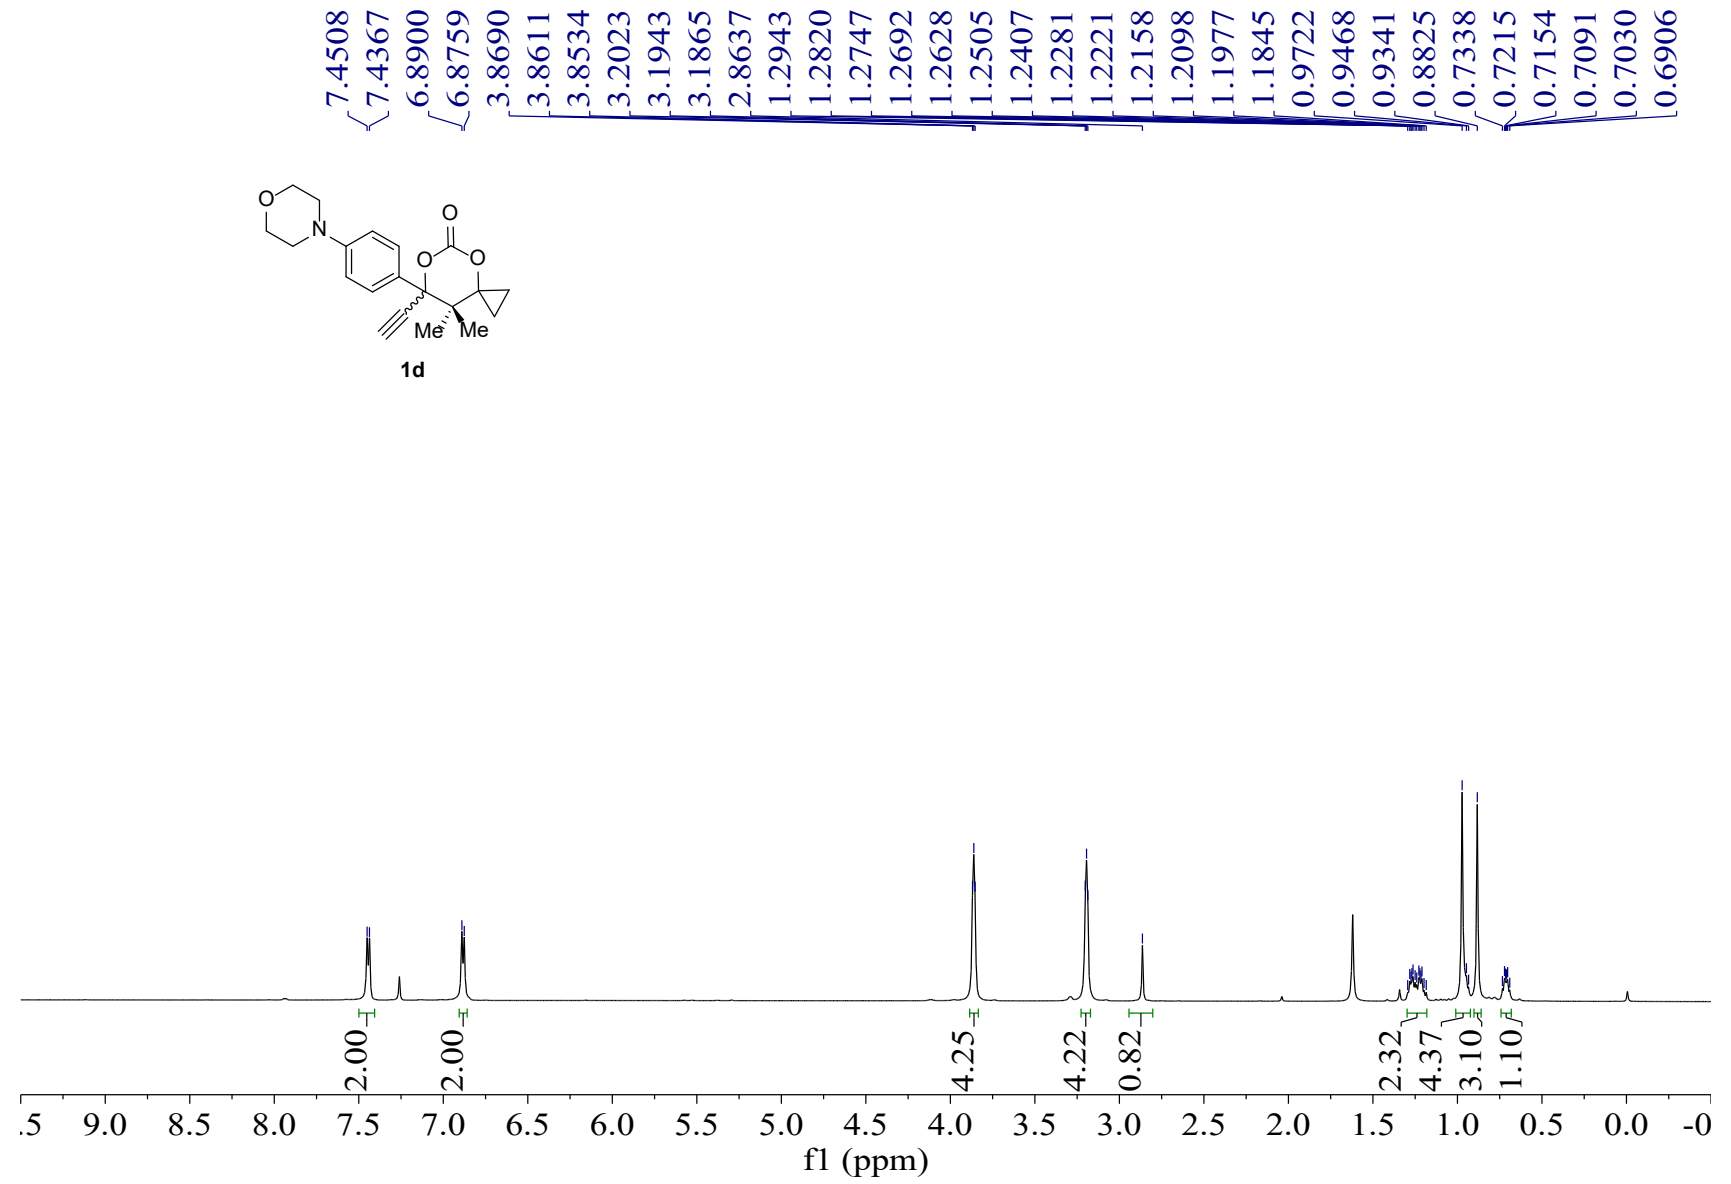

<sup>1</sup>H NMR spectrum of compound **1d**

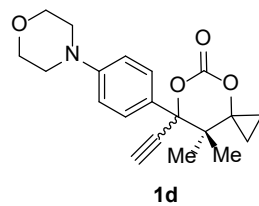

151.41  
148.64

128.35  
126.86

114.16

86.28  
81.36  
78.00  
70.20  
66.94

48.81  
38.25

19.85  
19.62  
12.19  
7.53

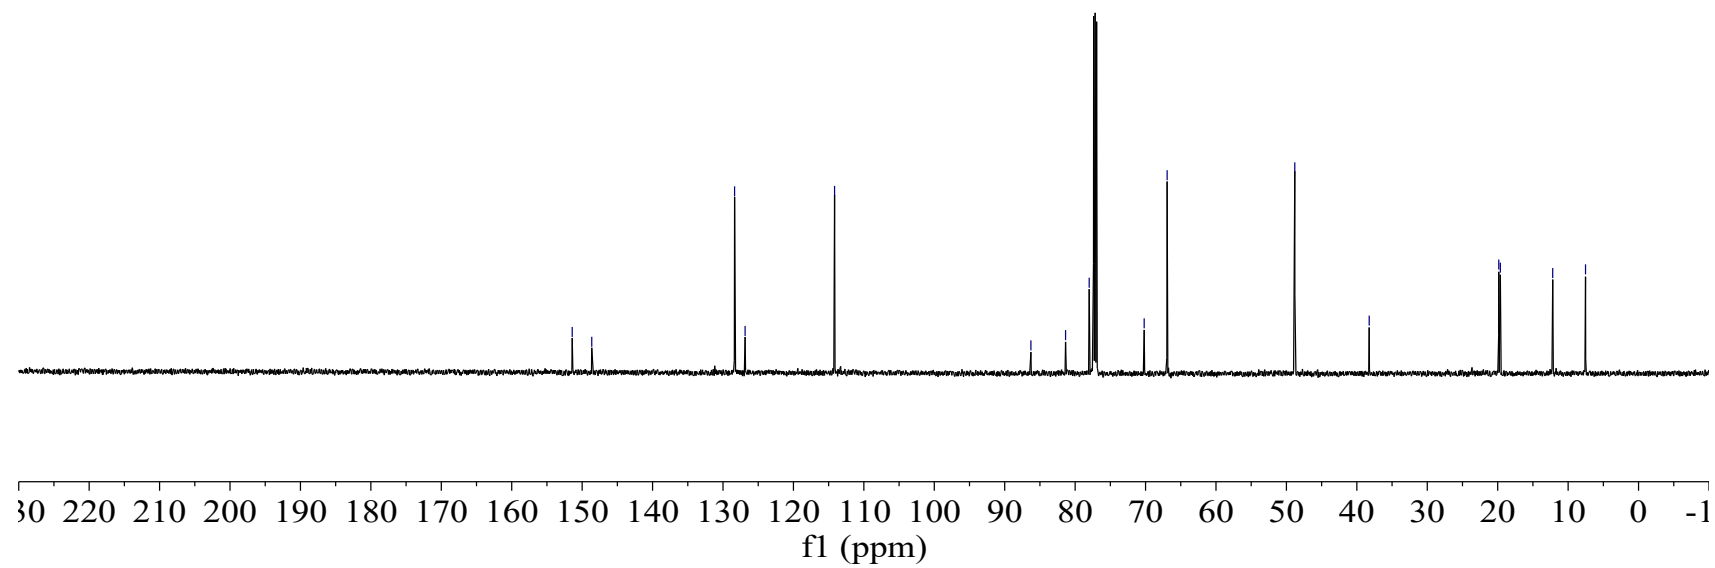

<sup>13</sup>C NMR spectrum of compound **1d**

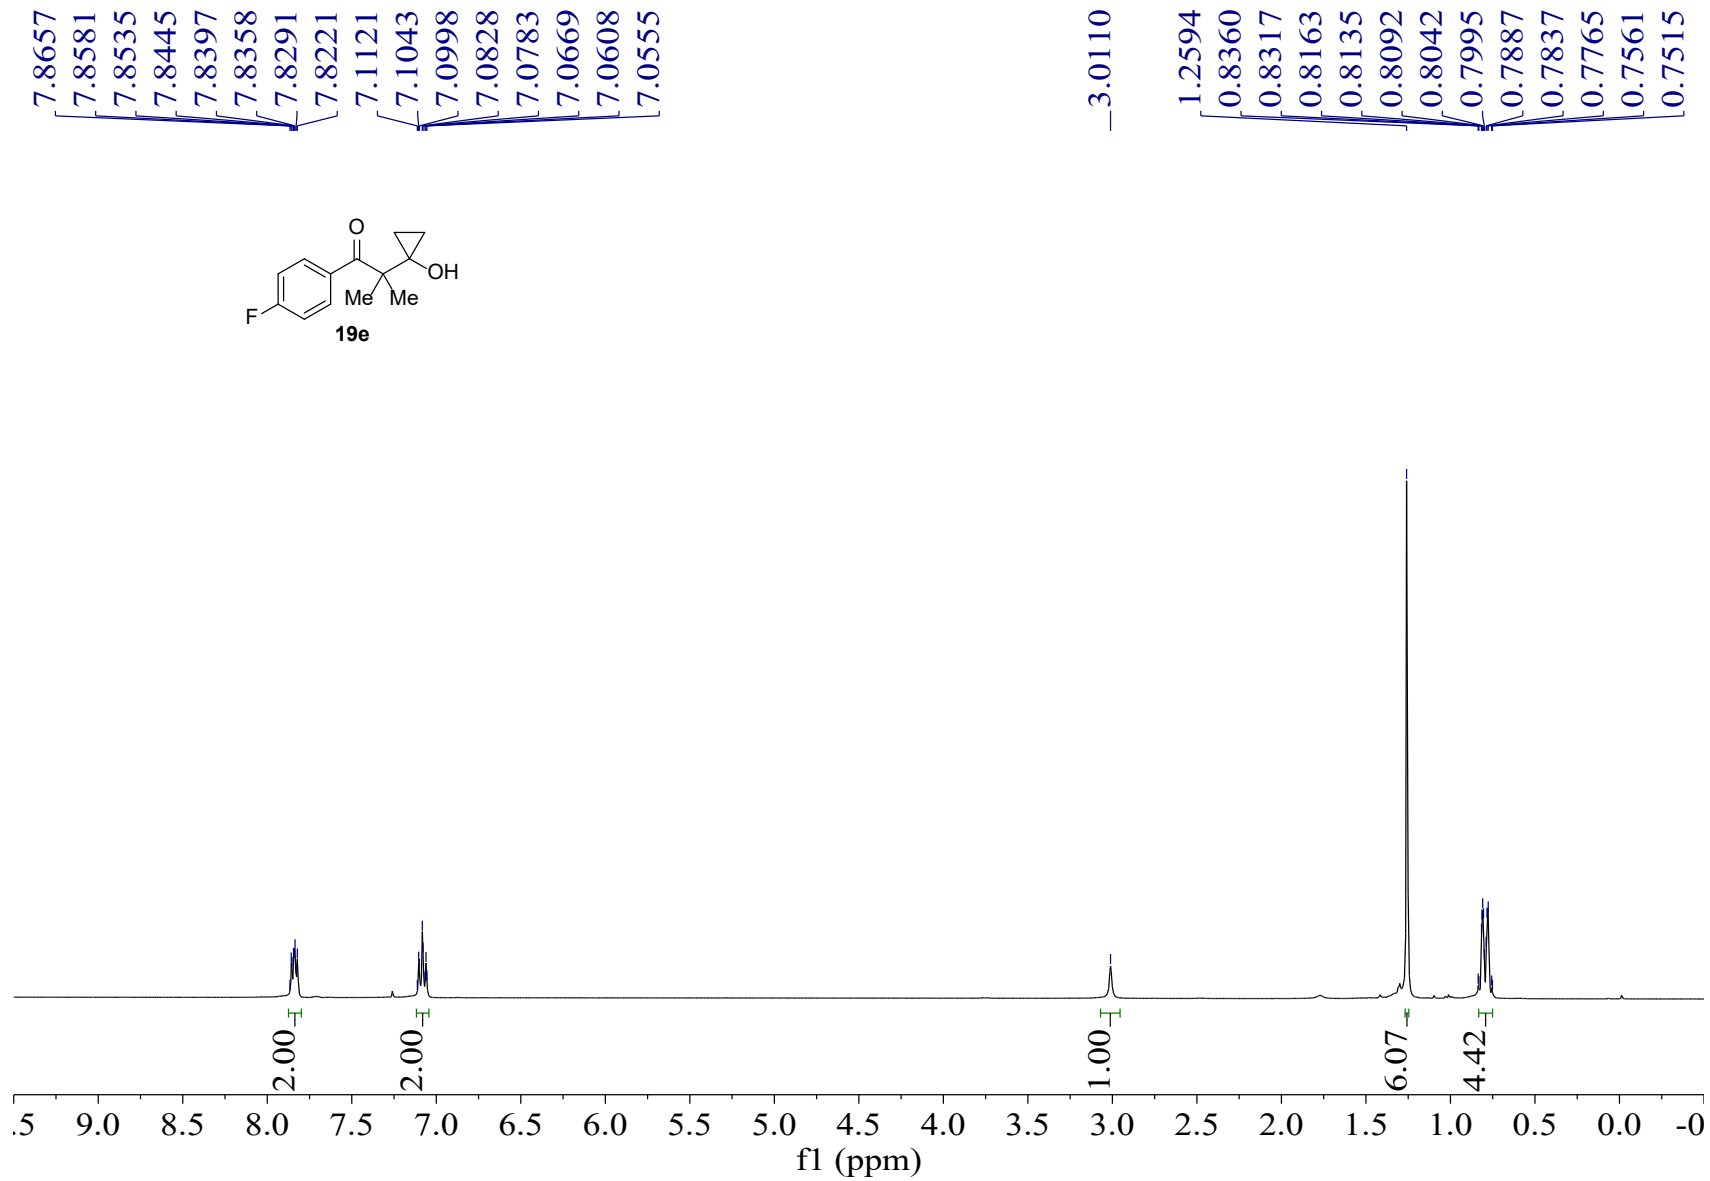

<sup>1</sup>H NMR spectrum of compound **19e**

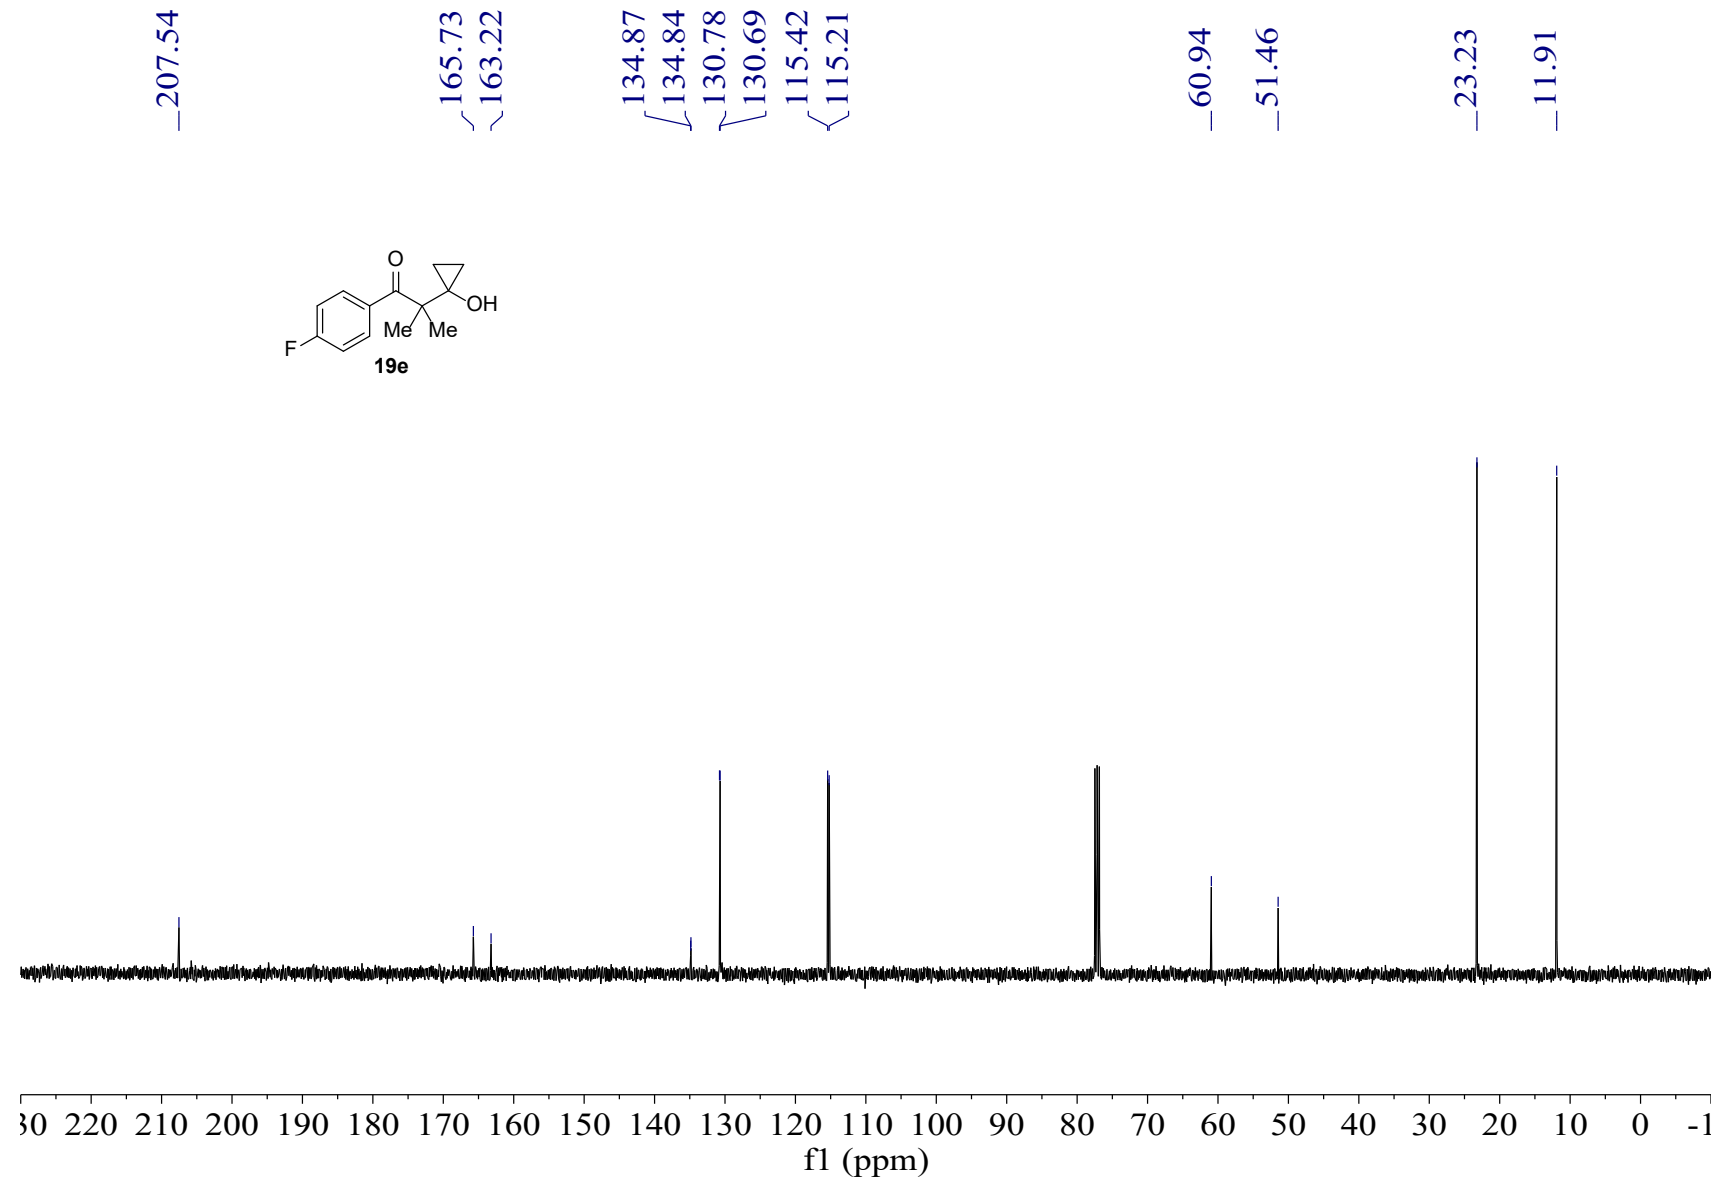

<sup>13</sup>C NMR spectrum of compound **19e**

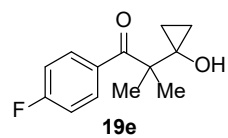

-114.79

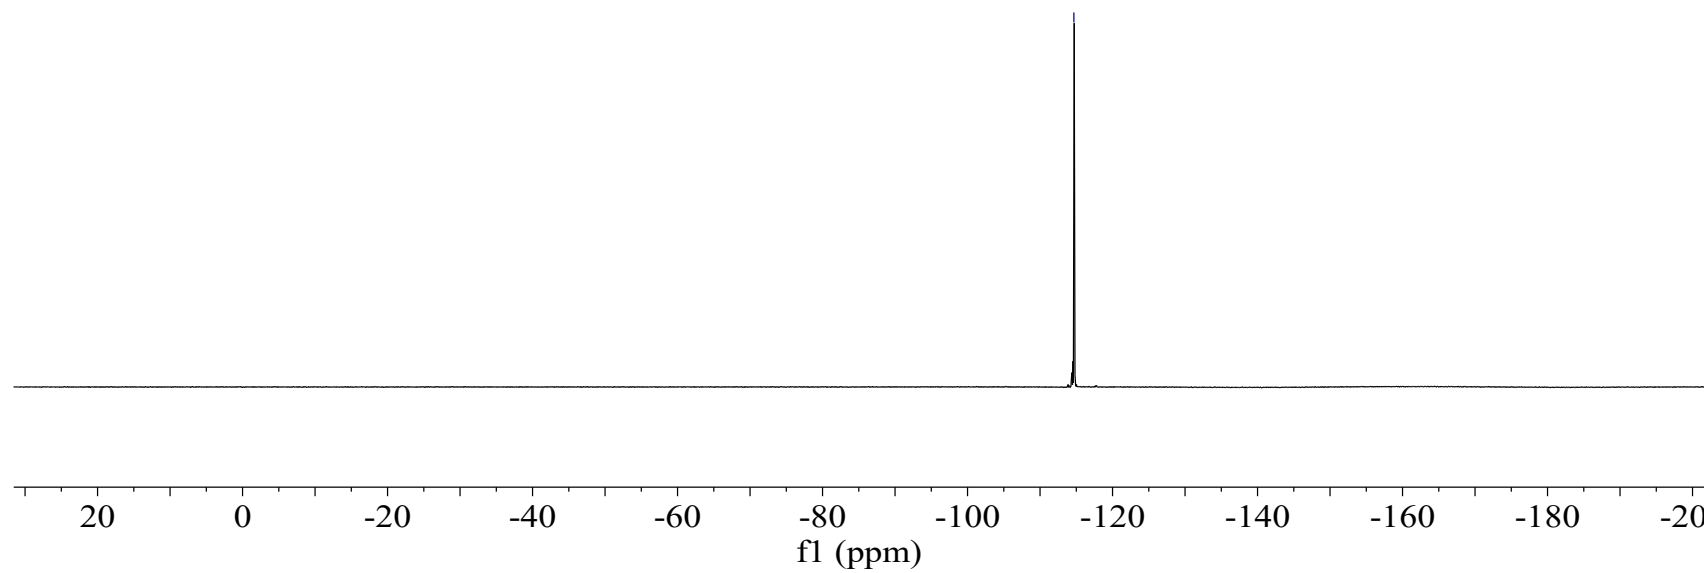

$^{19}\text{F}$  NMR spectrum of compound **19e**



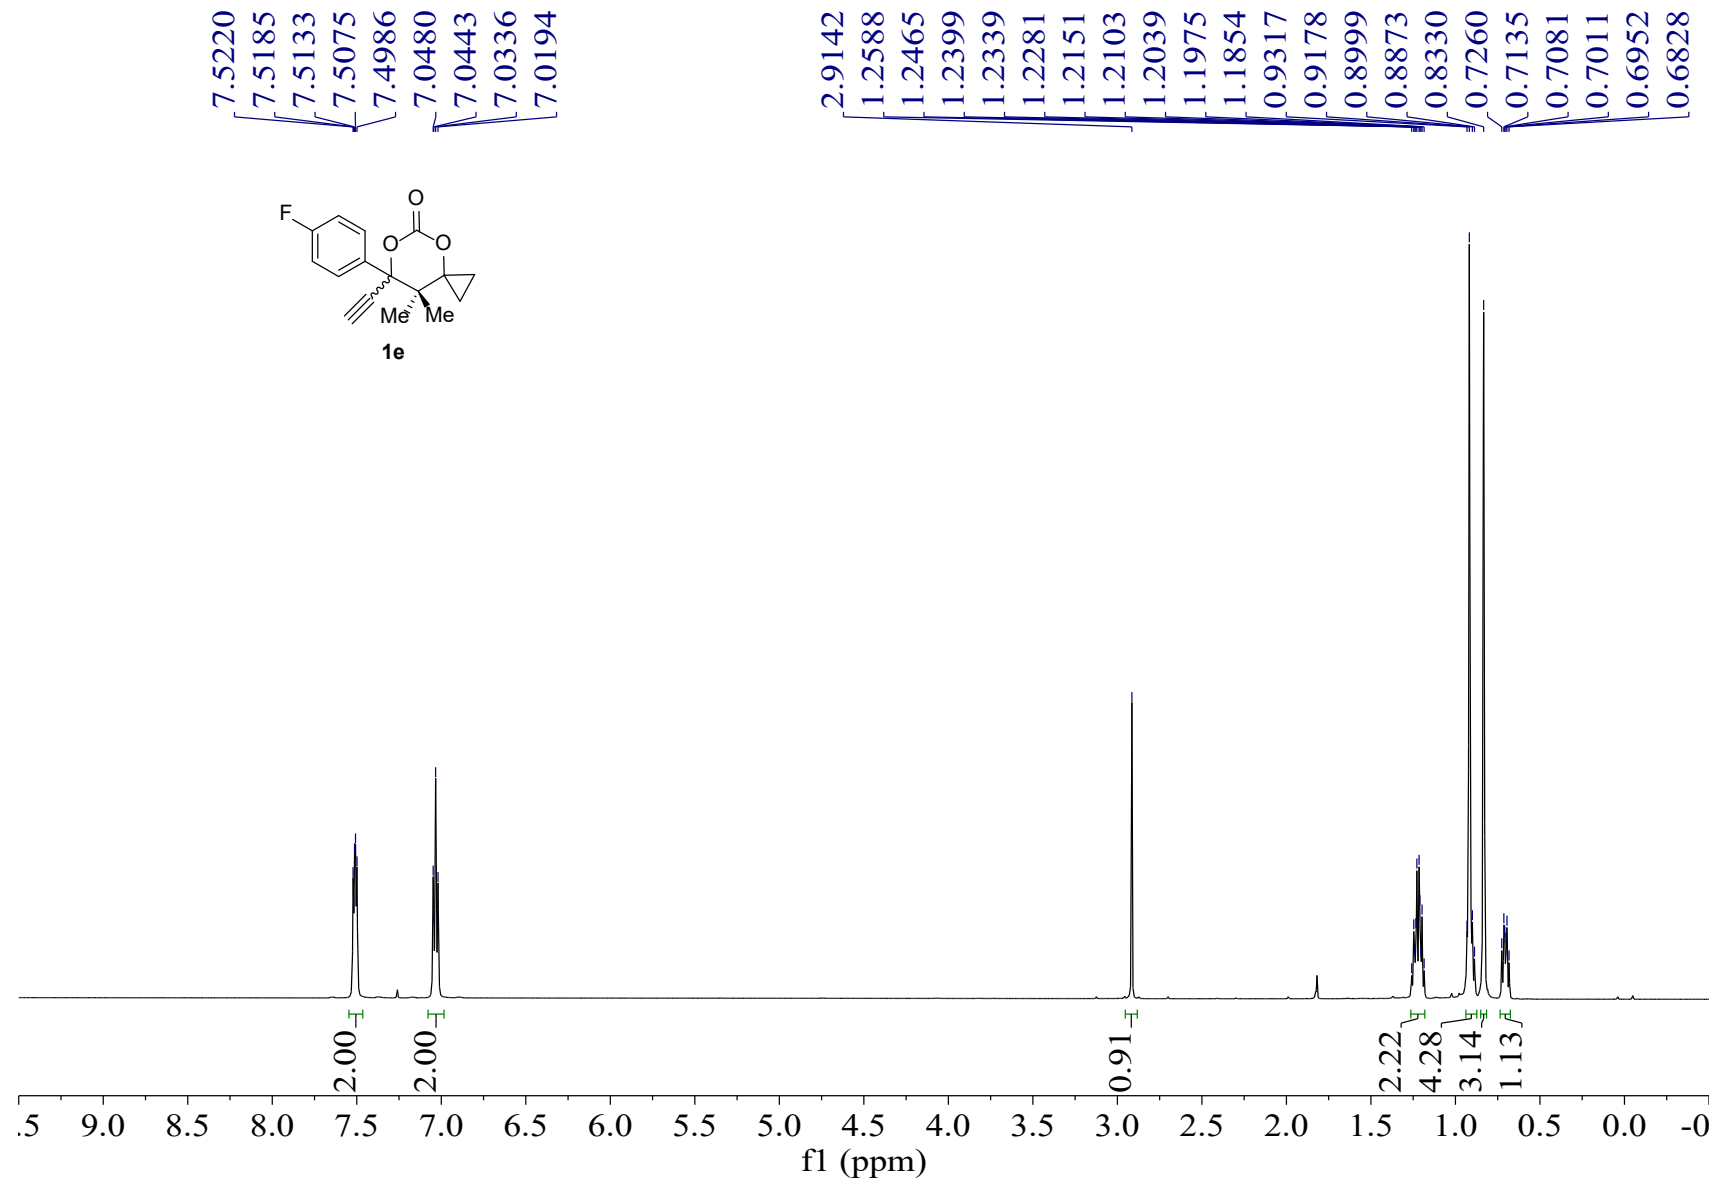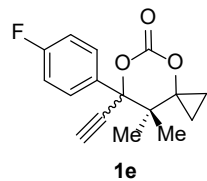

<sup>1</sup>H NMR spectrum of compound **1e**

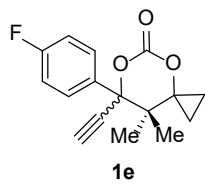

163.68  
 162.03  
 148.03  
 131.80  
 131.78  
 129.21  
 129.16  
 114.73  
 114.59  
 85.74  
 80.73  
 78.59  
 70.23  
 37.97  
 19.57  
 19.40  
 12.20  
 7.34

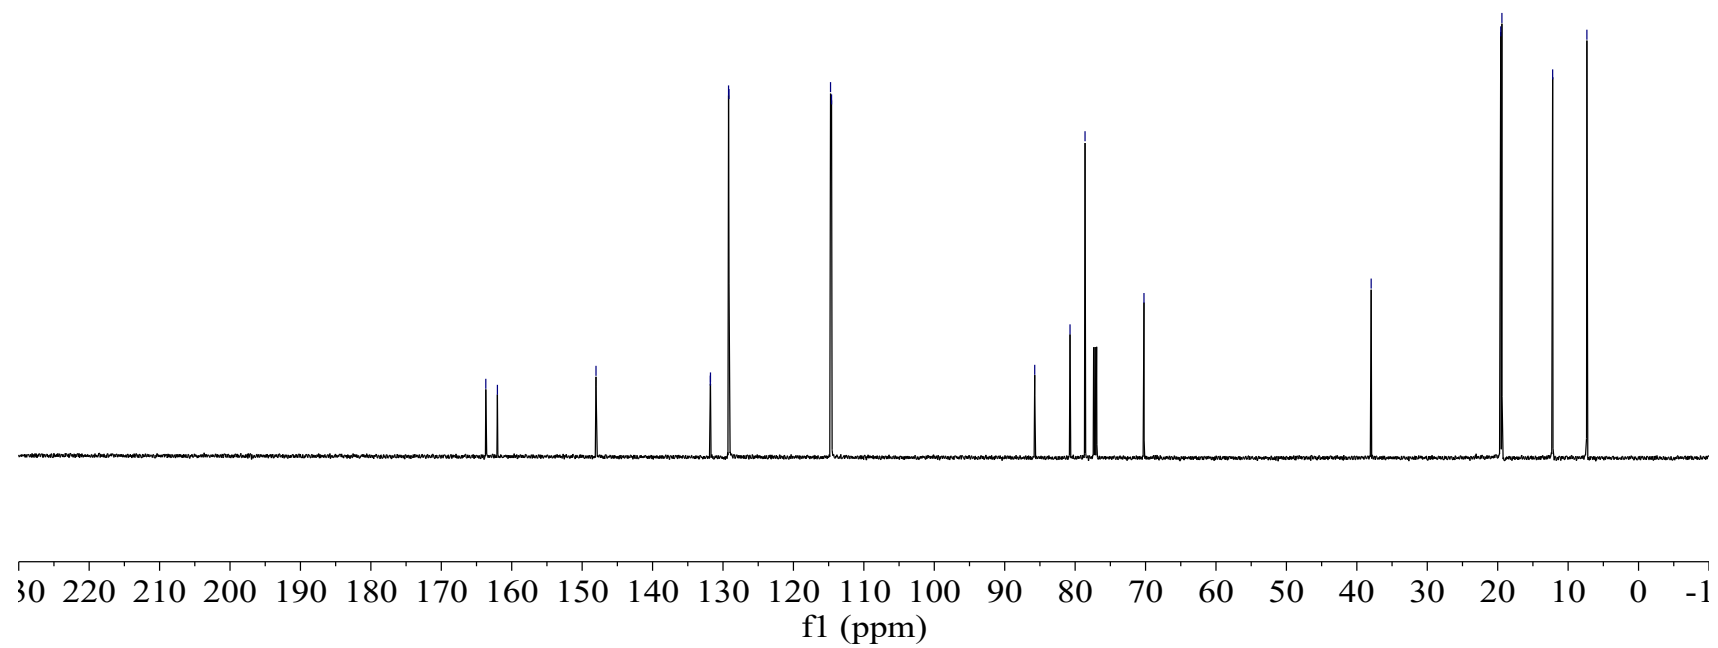

<sup>13</sup>C NMR spectrum of compound **1e**

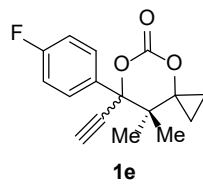

-112.94

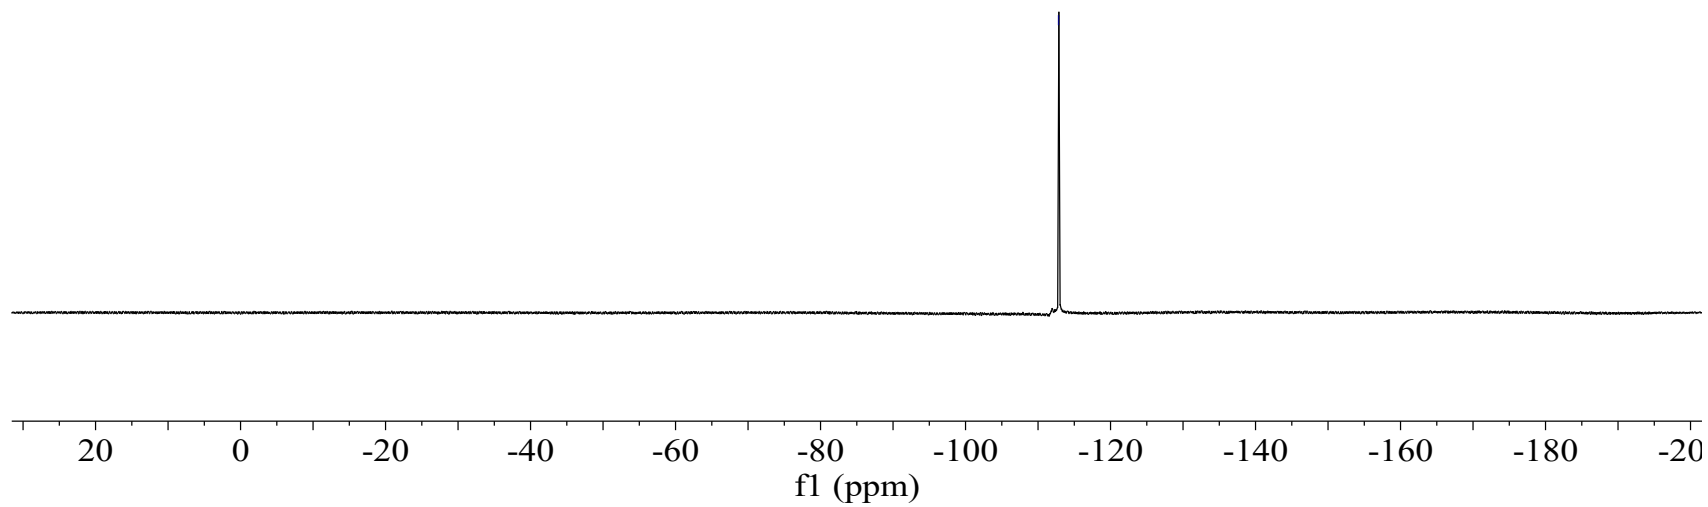

$^{19}\text{F}$  NMR spectrum of compound **1e**

7.7028  
7.6814  
7.3441  
7.3227

3.2862

1.1824  
0.7832  
0.7617  
0.7559  
0.7511  
0.7404  
0.7357  
0.7295  
0.7078

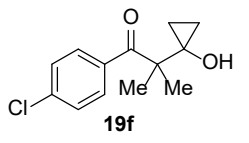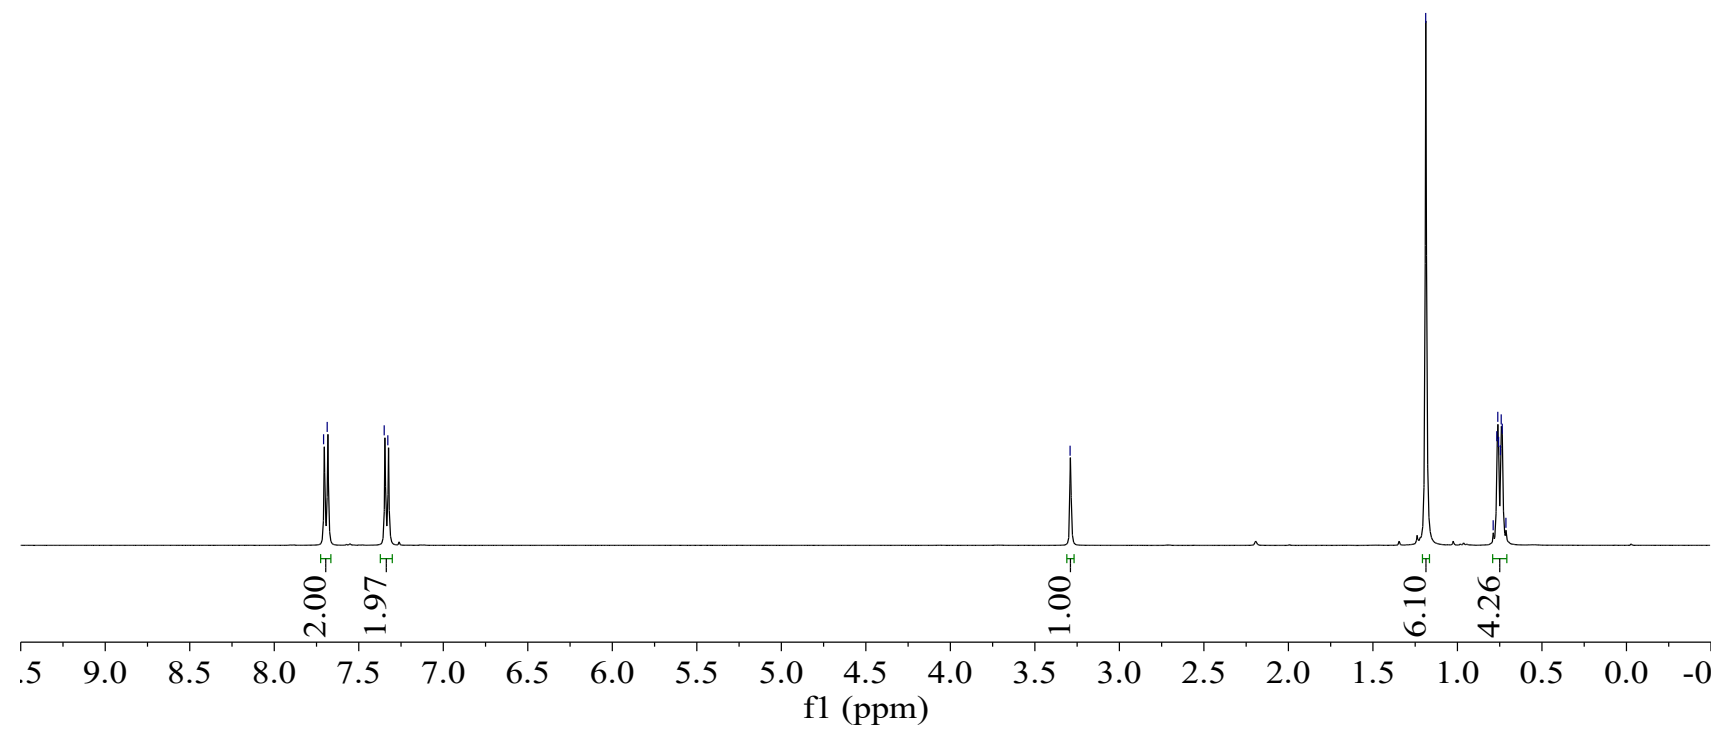

<sup>1</sup>H NMR spectrum of compound 19f

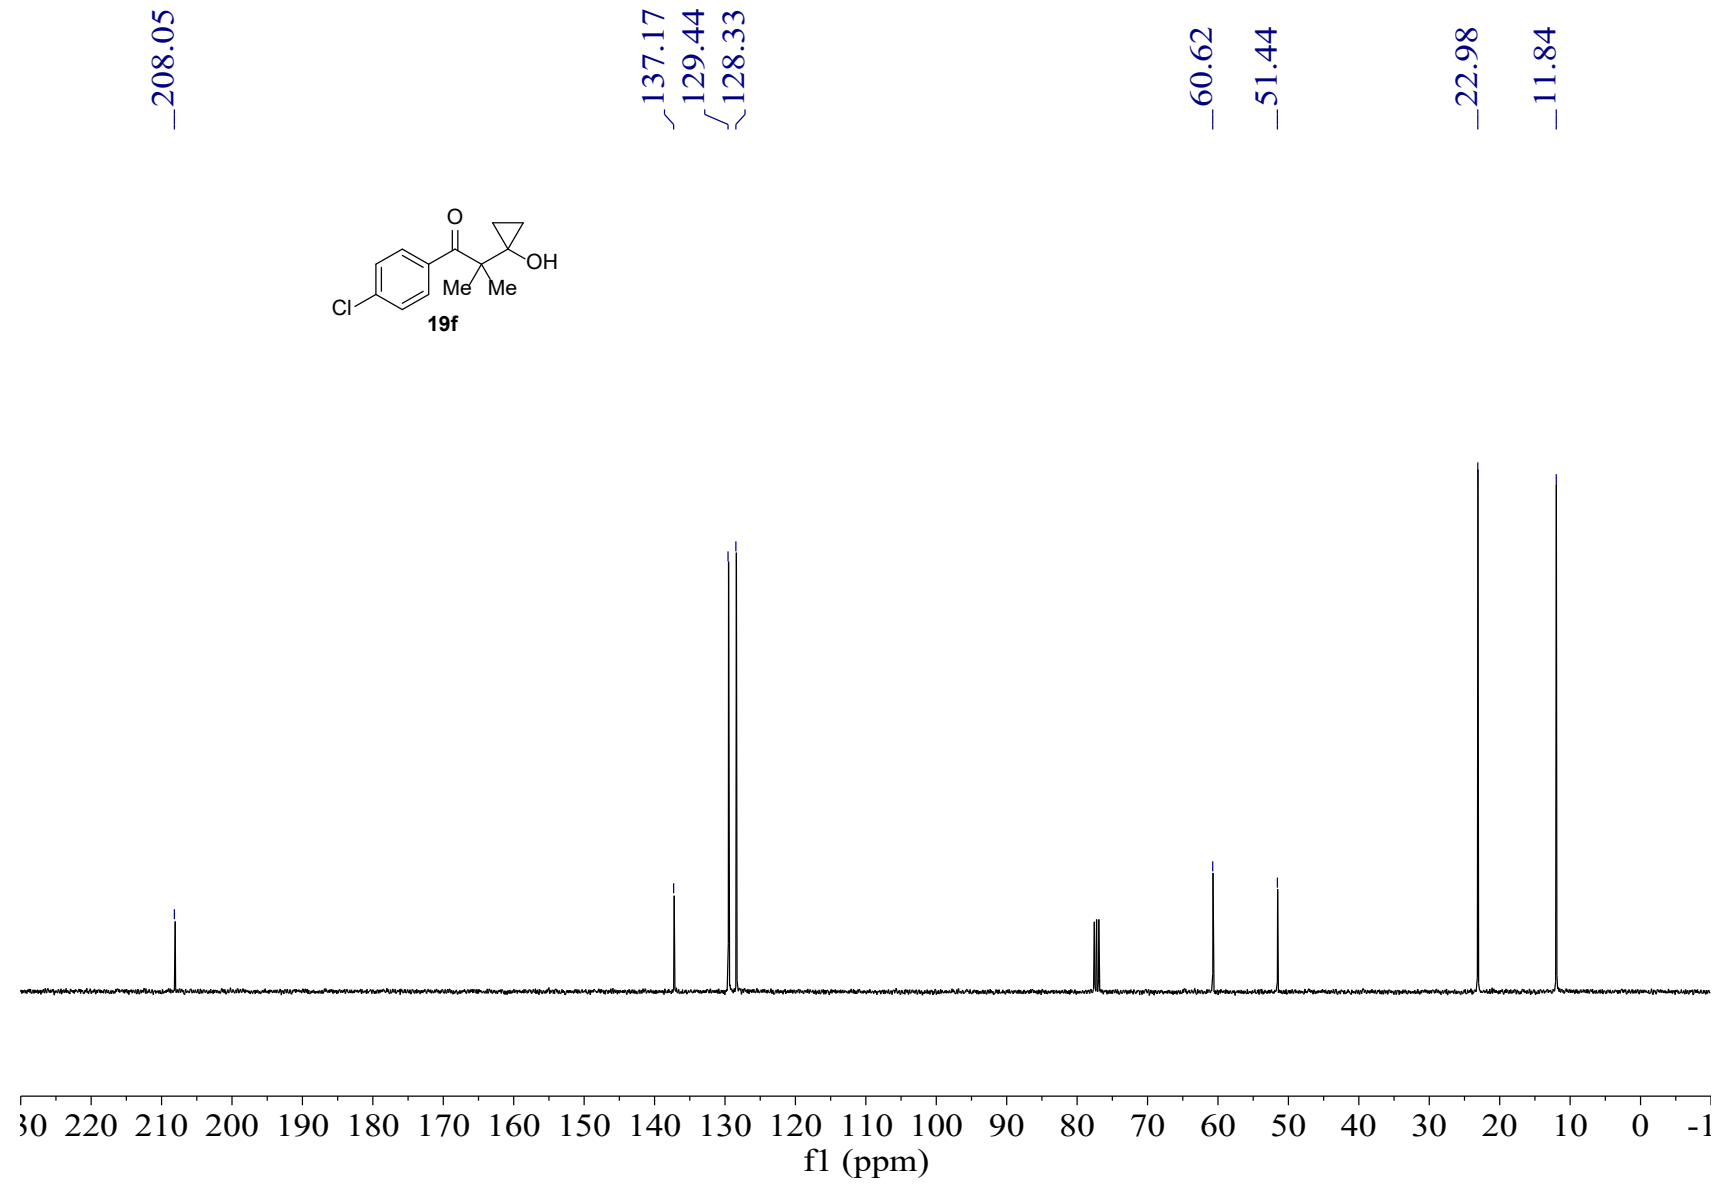

<sup>13</sup>C NMR spectrum of compound **19f**

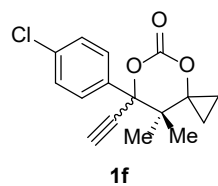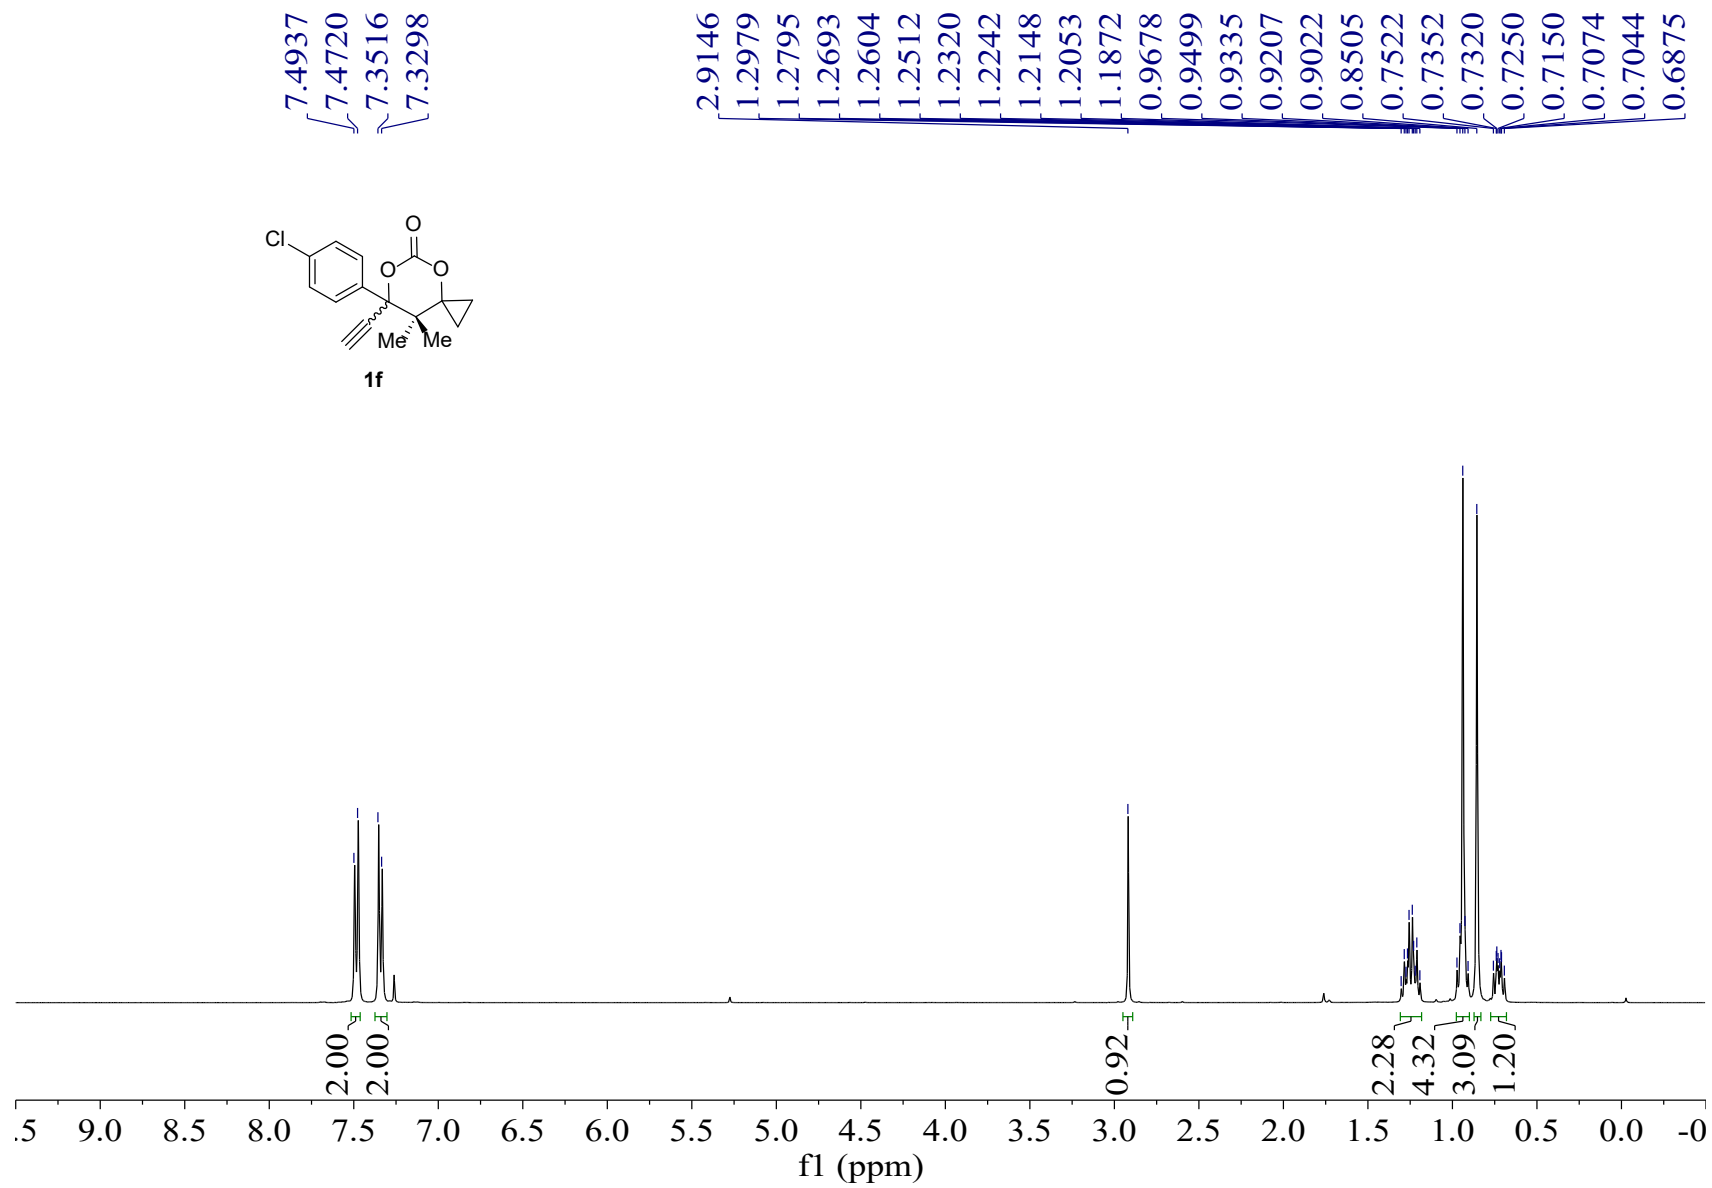

<sup>1</sup>H NMR spectrum of compound **1f**

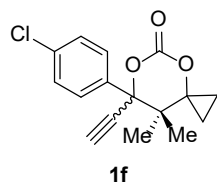

148.01  
 135.03  
 134.52  
 128.70  
 127.96

85.70  
 80.56  
 78.68  
 70.26

37.96

19.59  
 19.46  
 12.26  
 7.38

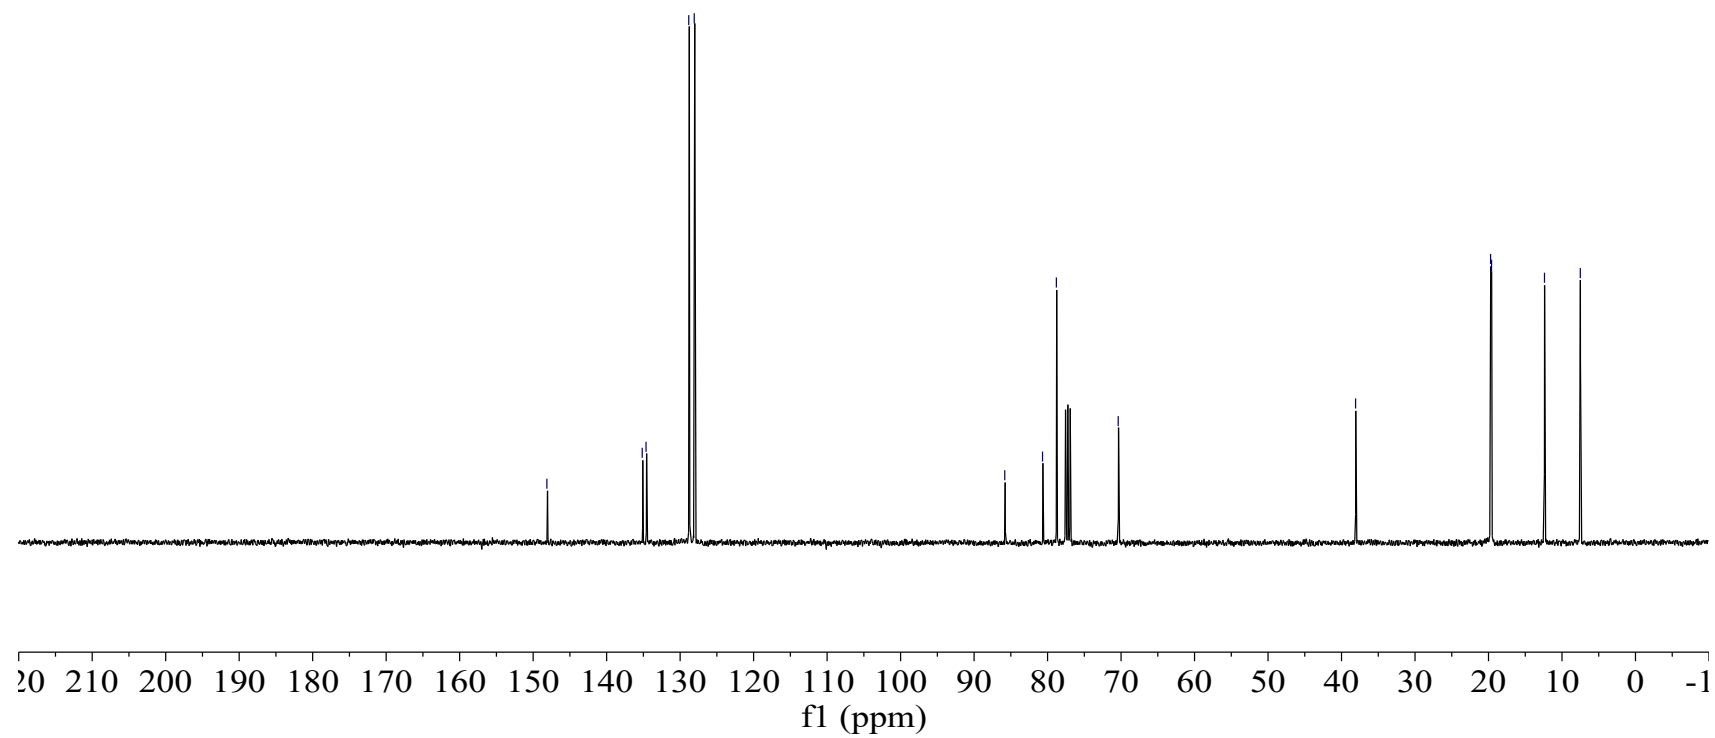

<sup>13</sup>C NMR spectrum of compound **1f**

7.6336  
7.6129  
7.5322  
7.5116

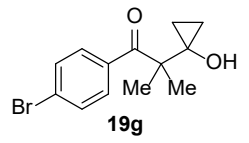

3.0918

1.2111  
0.8168  
0.8054  
0.7837  
0.7762  
0.7573  
0.7520  
0.7467  
0.7259  
0.7138

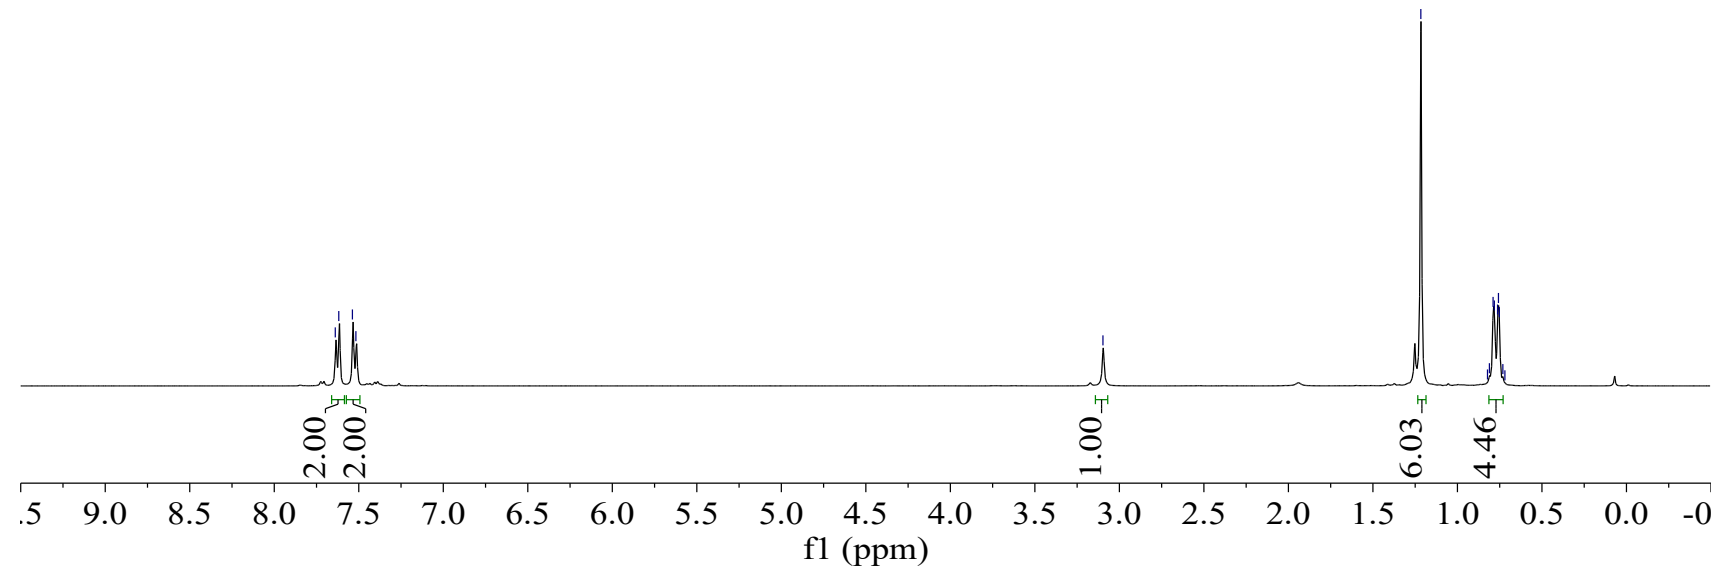

<sup>1</sup>H NMR spectrum of compound 19g



-208.34

137.75  
131.44  
129.59  
125.84

-60.76  
-51.53

29.80  
23.04  
11.86

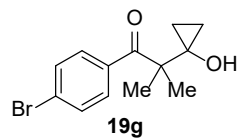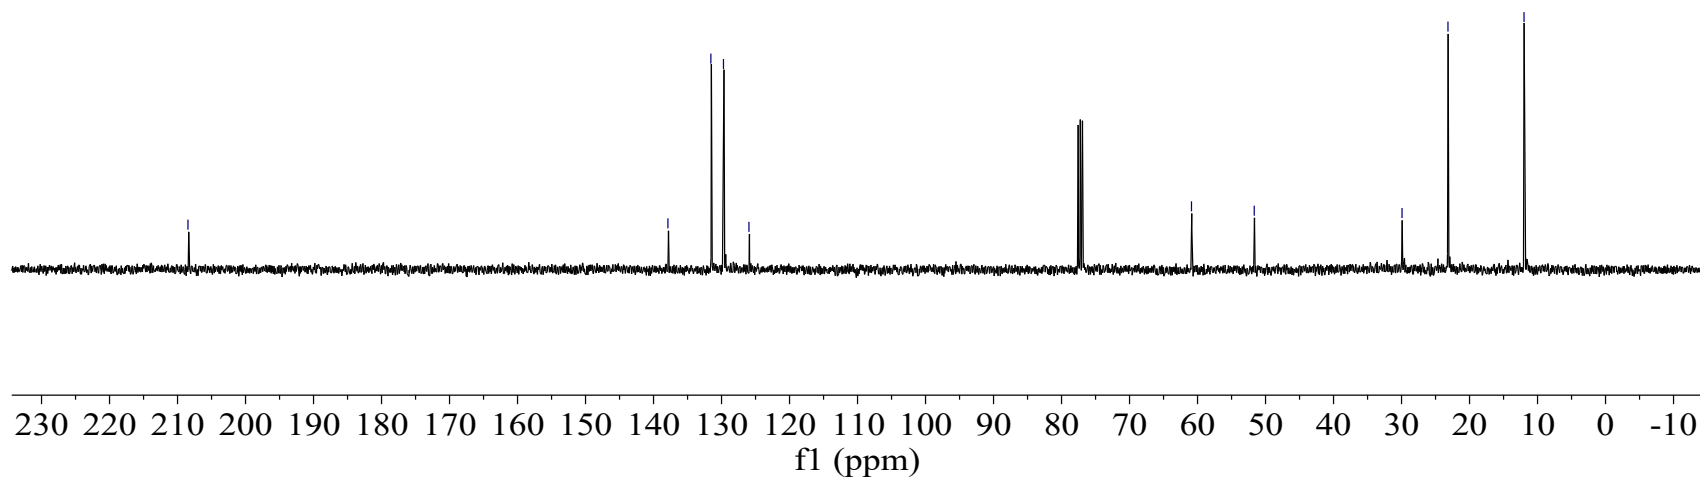

<sup>13</sup>C NMR spectrum of compound **19g**

7.5243  
7.5029  
7.4404  
7.4189

2.9106  
1.3161  
1.2977  
1.2871  
1.2787  
1.2686  
1.2612  
1.2495  
1.2416  
1.2340  
1.2236  
1.2151  
1.1970  
0.9869  
0.9686  
0.9479  
0.9211  
0.8653  
0.7625  
0.7442  
0.7350  
0.7253  
0.7166  
0.6981

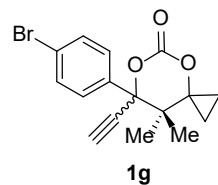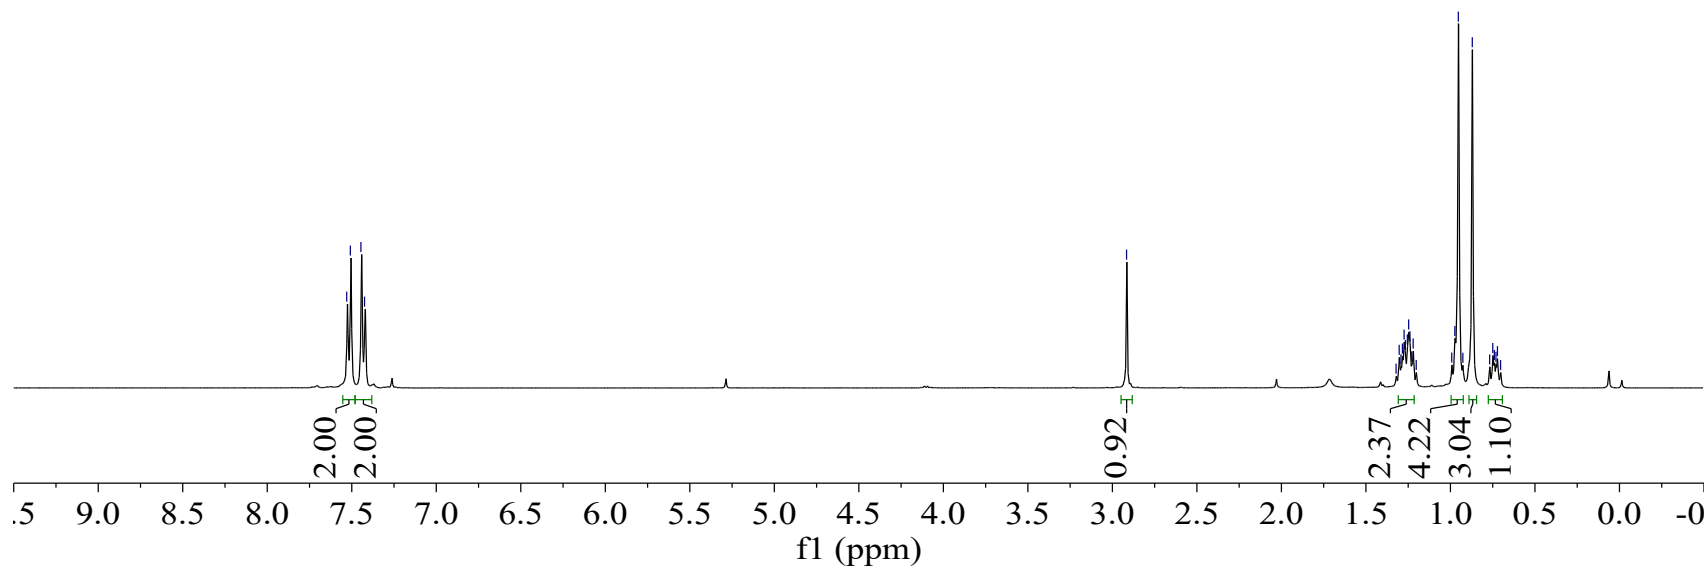

<sup>1</sup>H NMR spectrum of compound **1g**

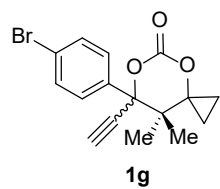

148.03  
 135.10  
 130.98  
 129.03  
 123.36

85.78  
 80.58  
 78.67  
 70.29

37.96  
 19.65  
 19.52  
 12.30  
 7.43

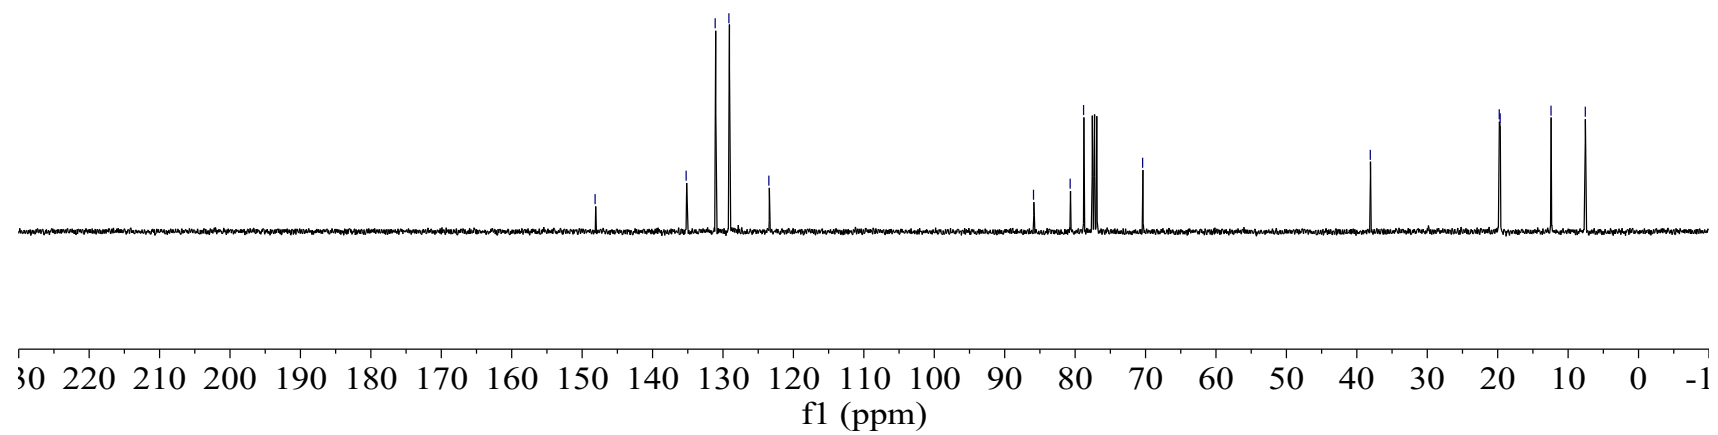

<sup>13</sup>C NMR spectrum of compound **1g**

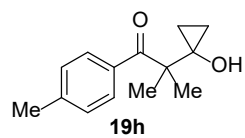

7.7233  
 { 7.7029  
 7.2205  
 { 7.2005

— 3.1483

1.2878  
 { 0.8222  
 { 0.8014  
 { 0.7955  
 { 0.7904  
 { 0.7763  
 { 0.7714  
 { 0.7649  
 { 0.7440

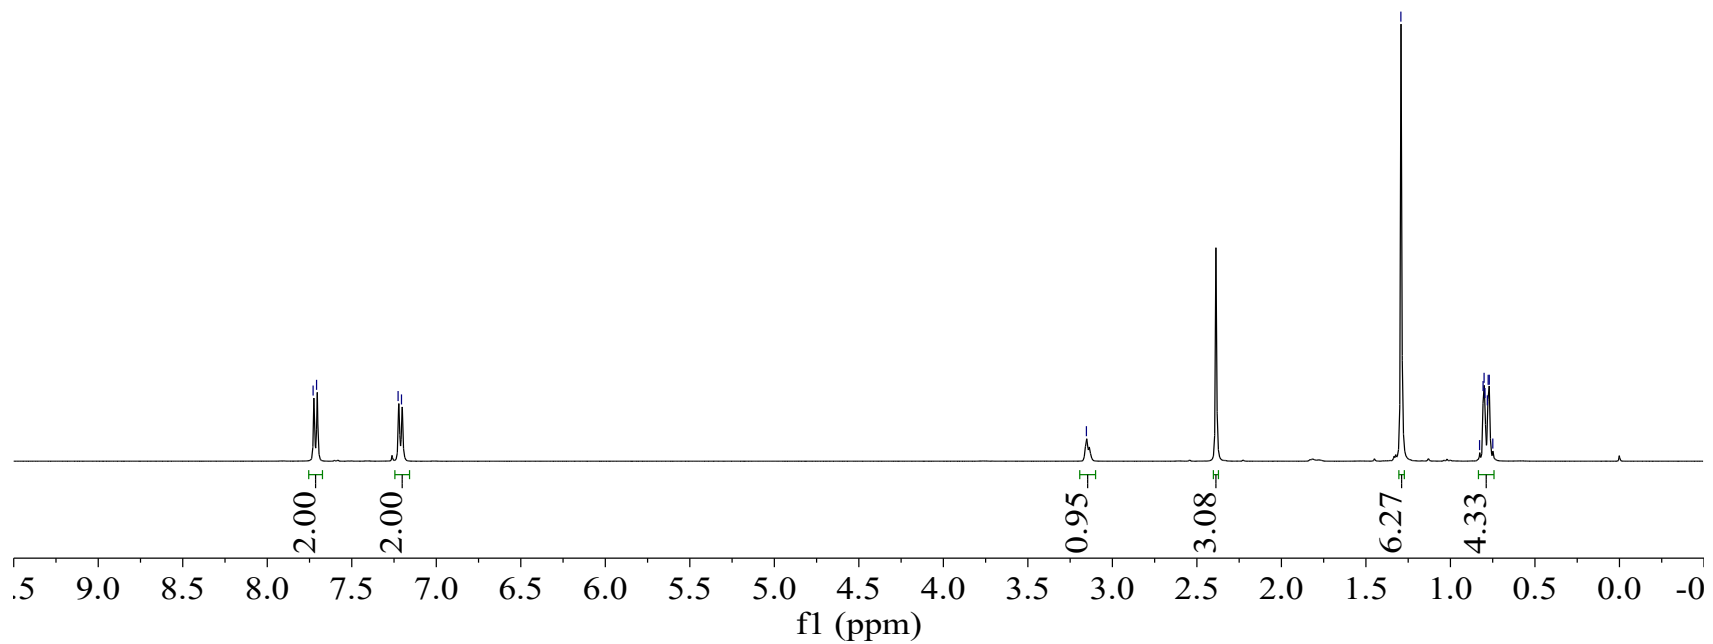

<sup>1</sup>H NMR spectrum of compound **19h**

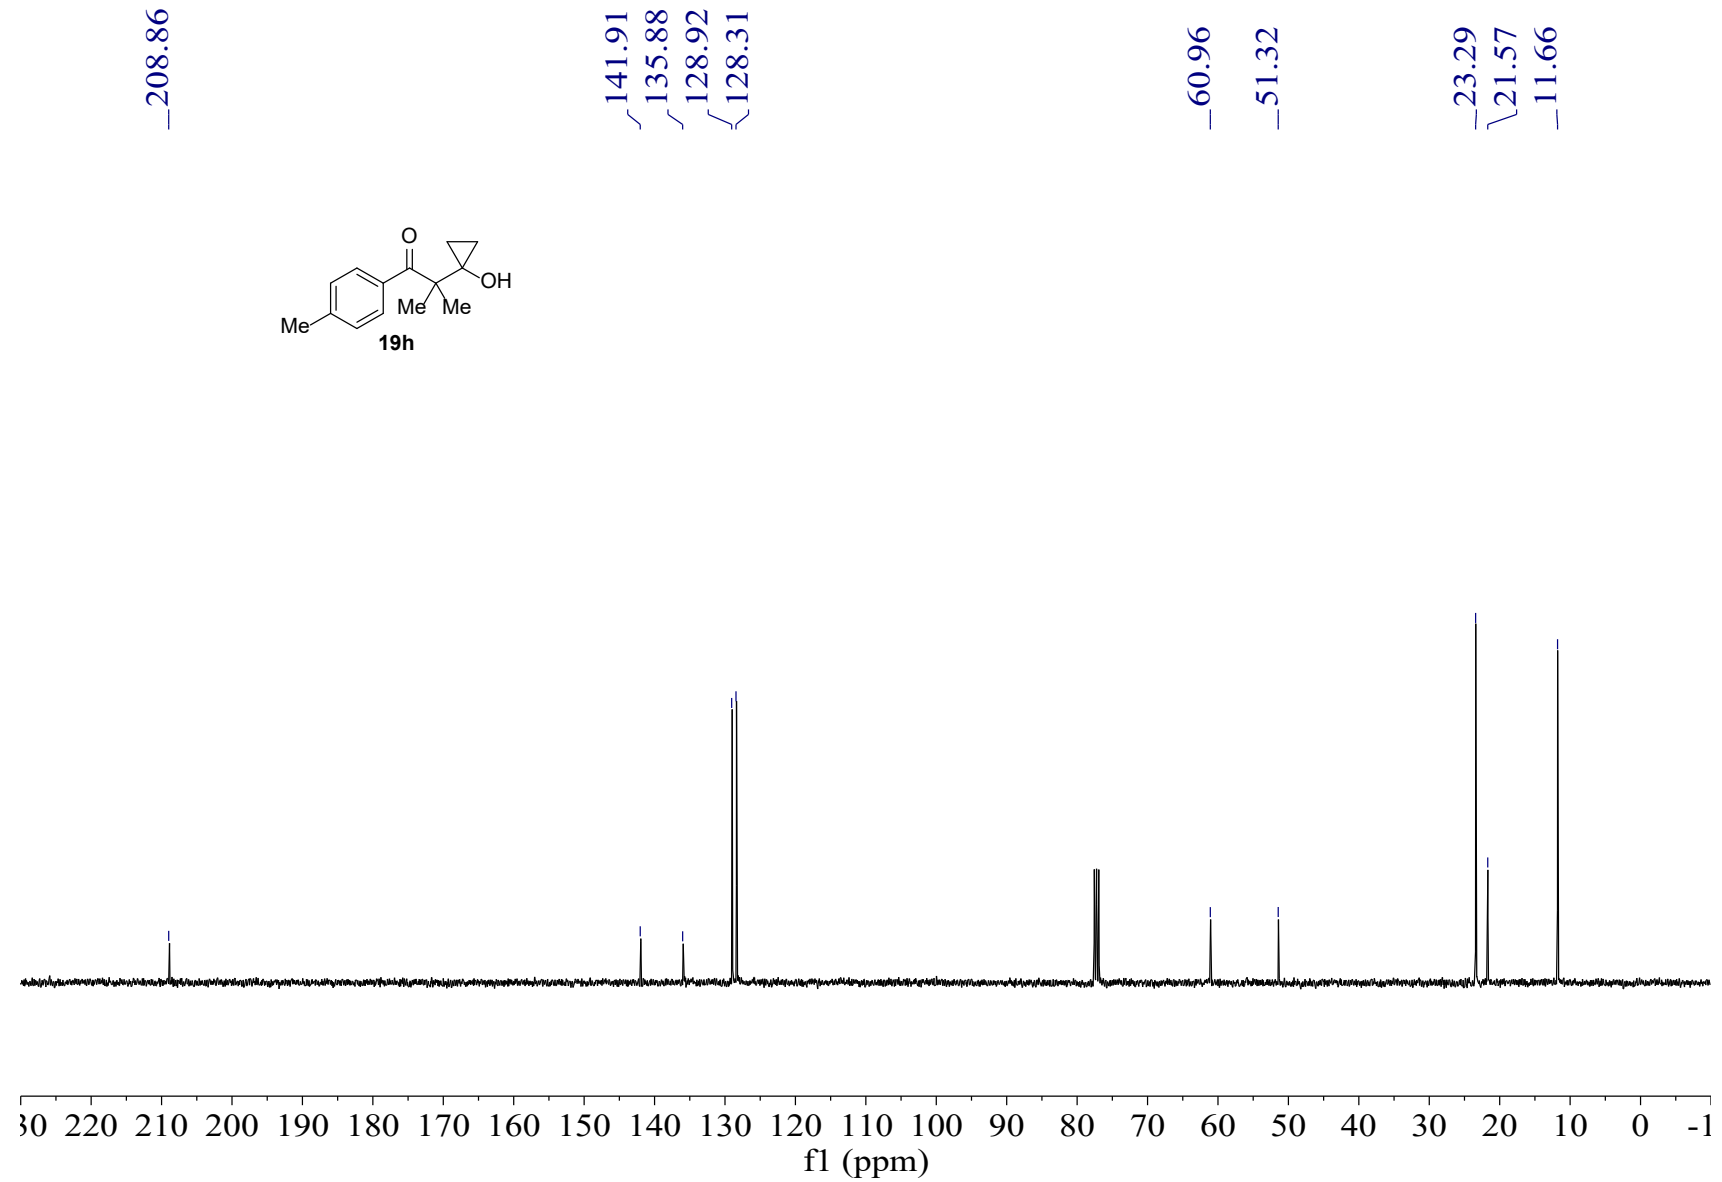

<sup>13</sup>C NMR spectrum of compound **19h**

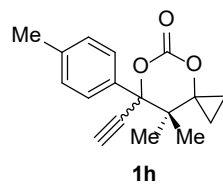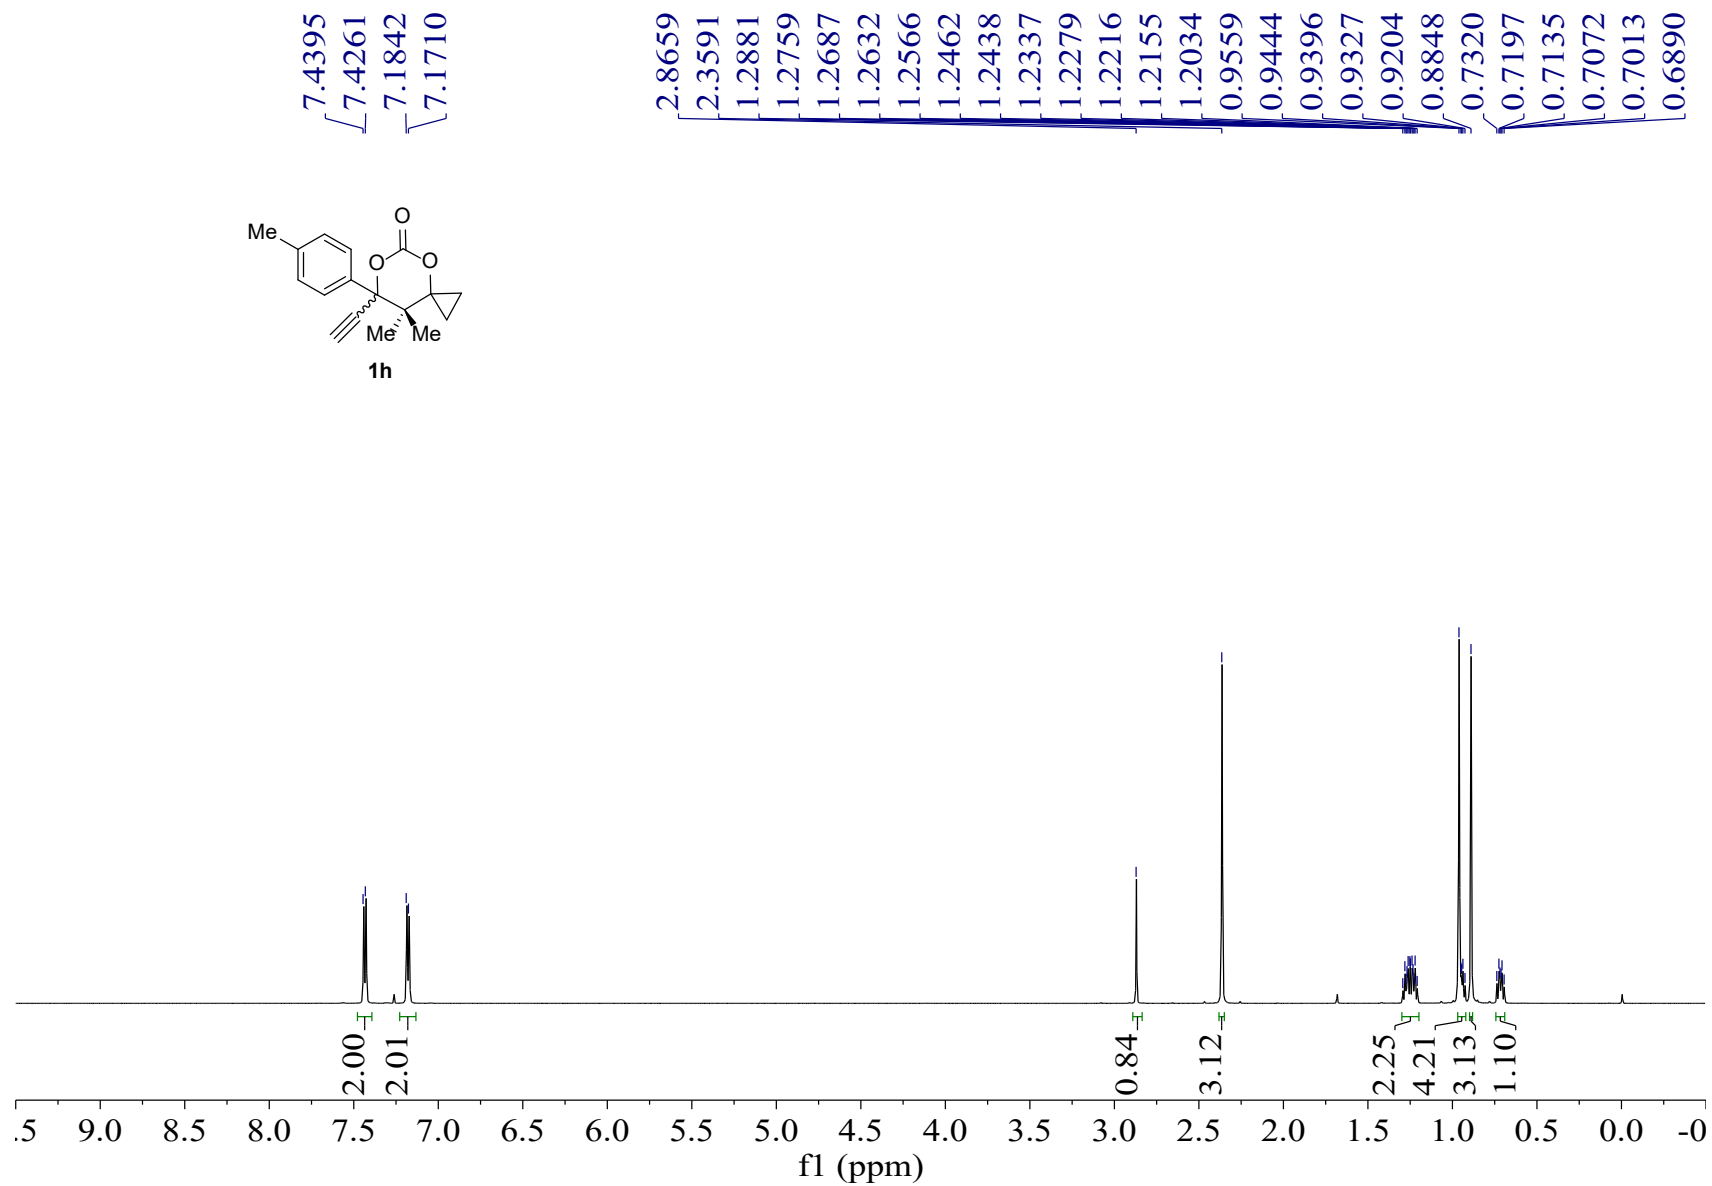

<sup>1</sup>H NMR spectrum of compound **1h**

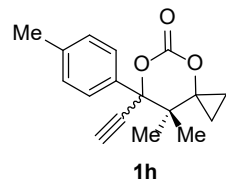

148.47  
138.80  
133.07  
128.43  
127.22

86.29  
81.22  
78.08  
70.19

38.01  
21.15  
19.79  
19.58  
12.16  
7.47

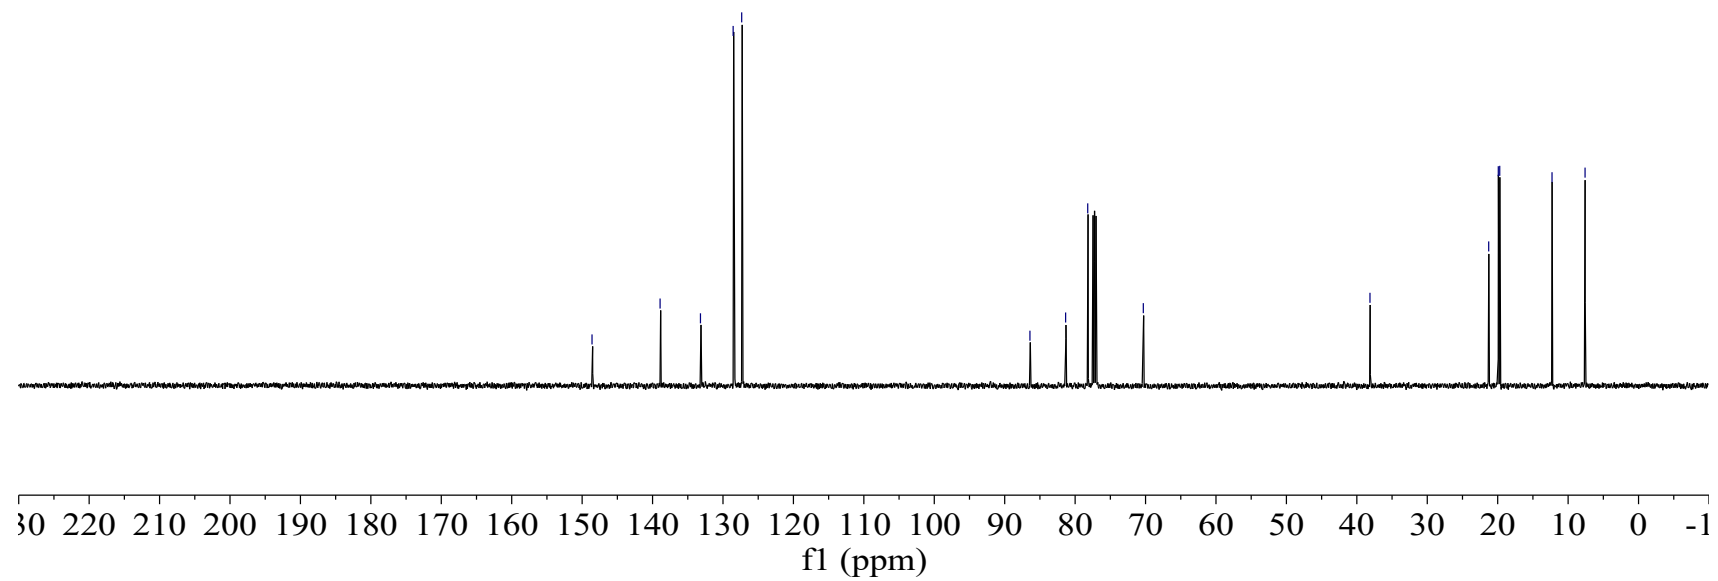

<sup>13</sup>C NMR spectrum of compound **1h**

7.7795  
7.7591  
7.6549  
7.6344

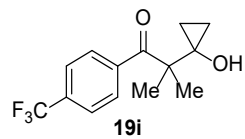

3.0891

1.2017  
0.7998  
0.7786  
0.7721  
0.7675  
0.7511  
0.7460  
0.7400  
0.7191

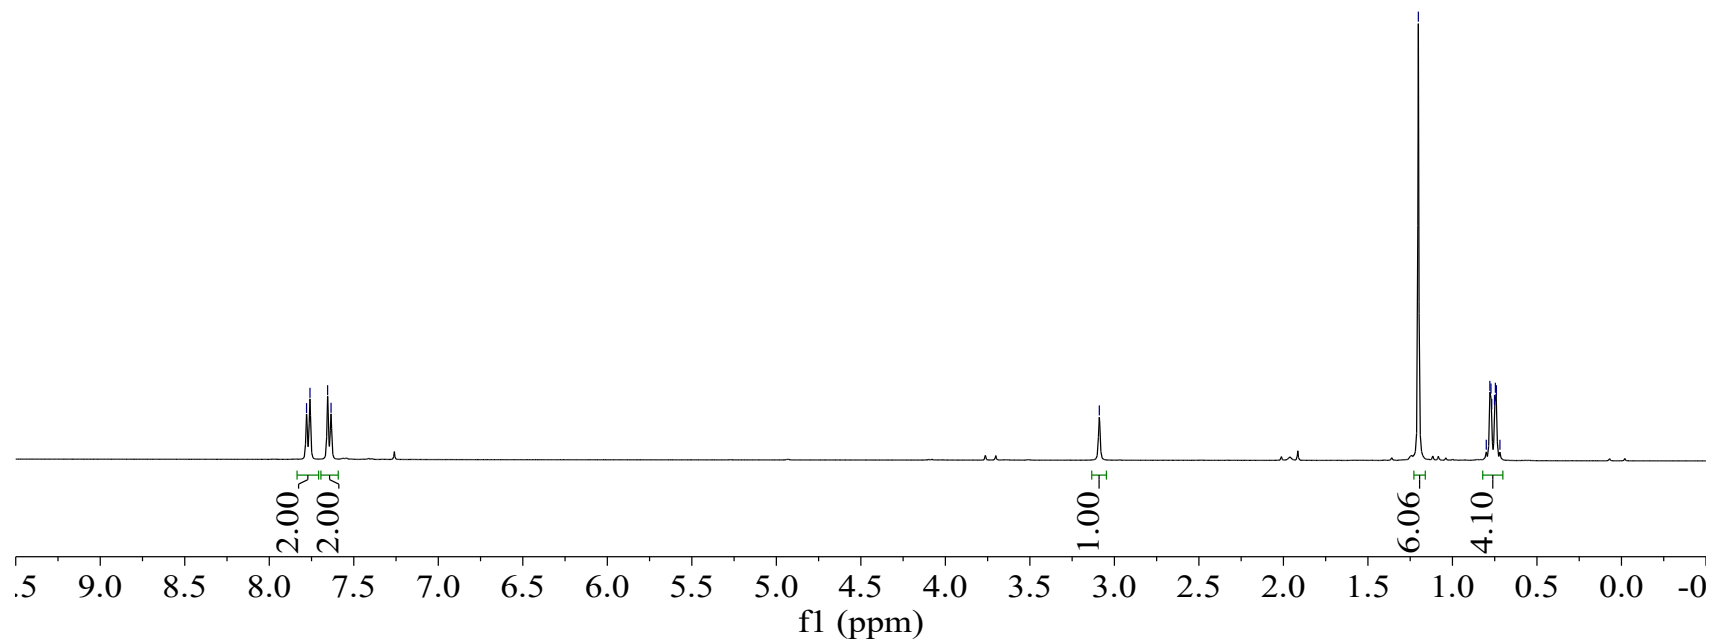

<sup>1</sup>H NMR spectrum of compound **19i**



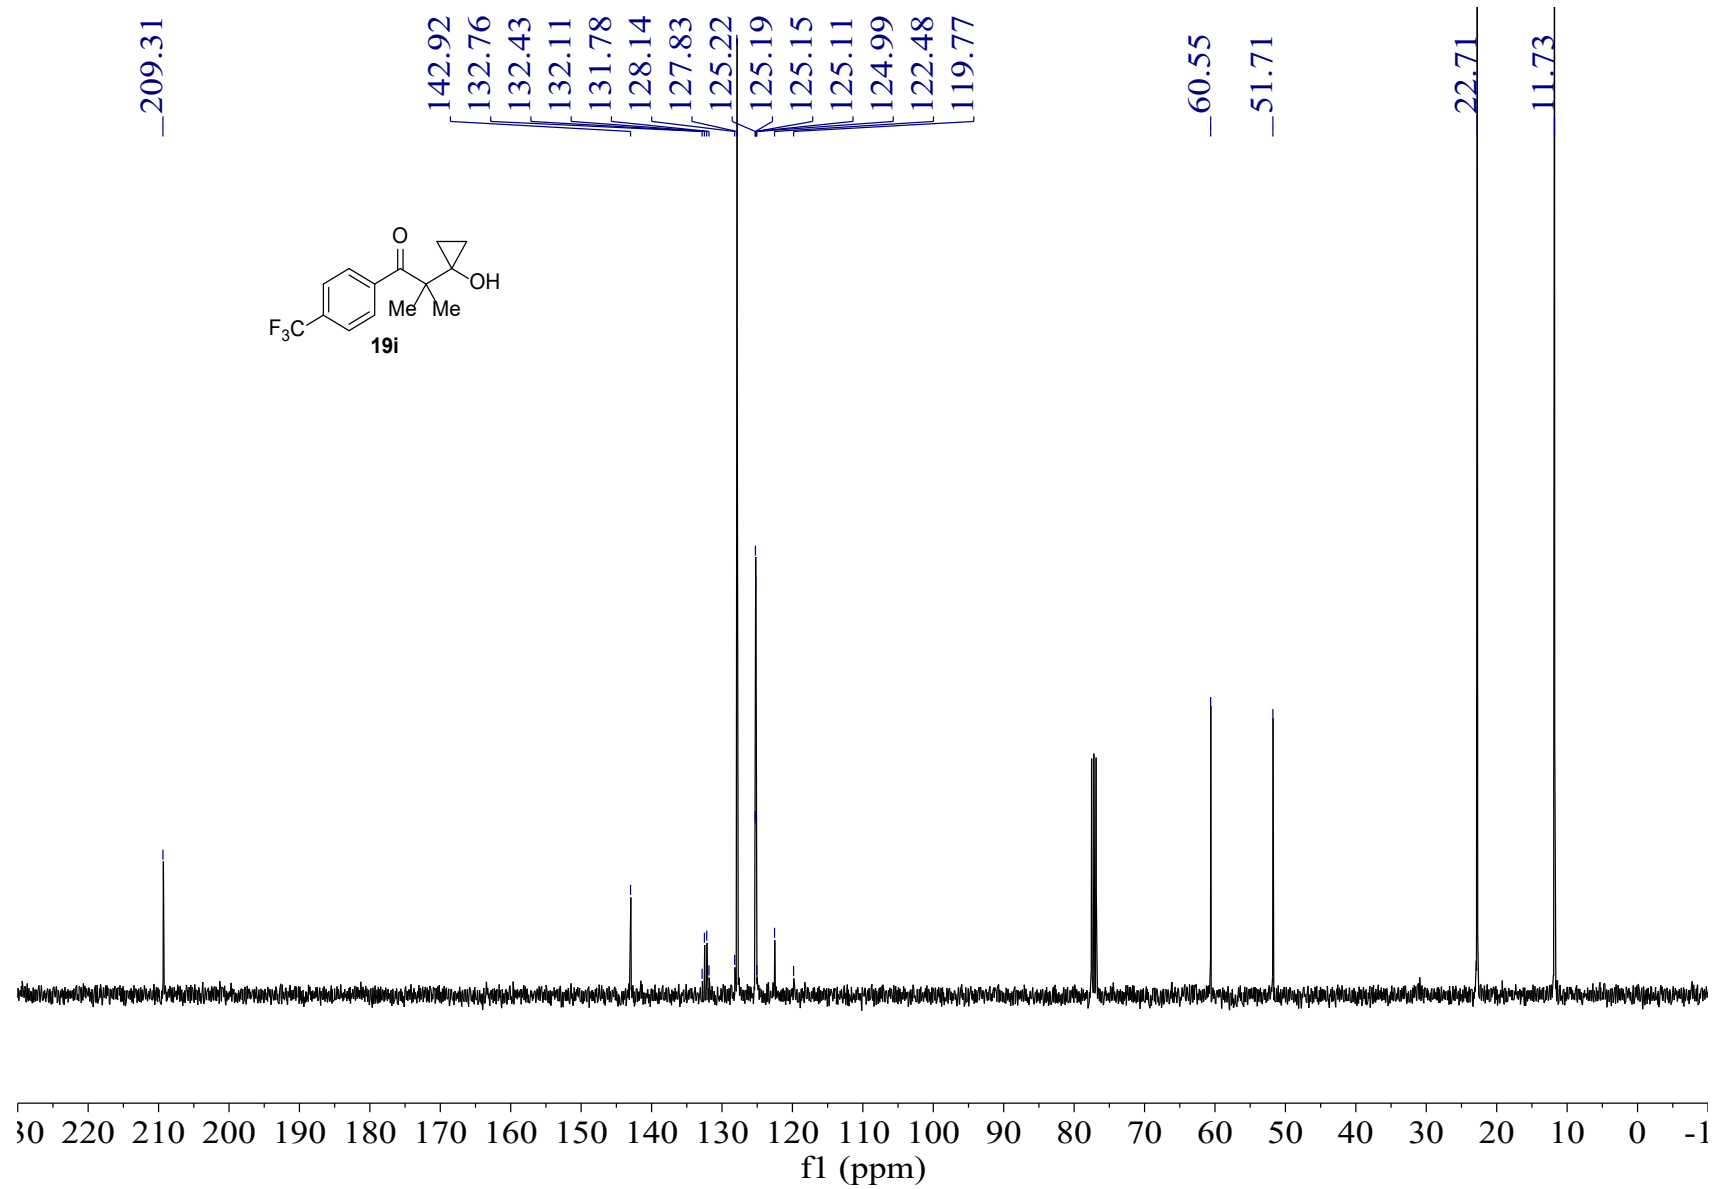

**<sup>13</sup>C NMR spectrum of compound 19i**

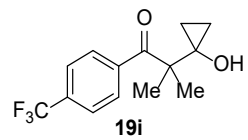

-62.54

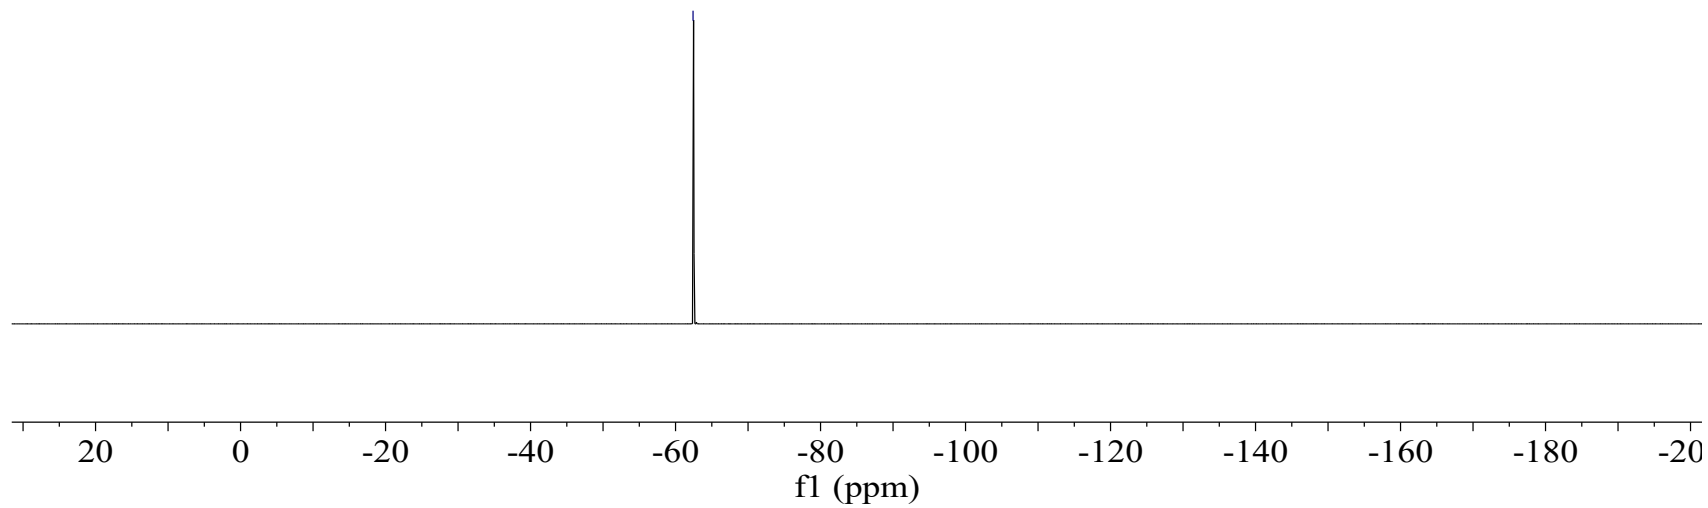

$^{19}\text{F}$  NMR spectrum of compound **19i**

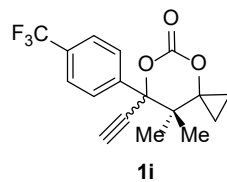

7.6719  
7.6514  
7.6066  
7.5858

2.9599  
1.2632  
1.2452  
1.2387  
1.2247  
1.2180  
1.2122  
1.1939  
1.1739  
0.9204  
0.8976  
0.8748  
0.8544  
0.8324  
0.7358  
0.7185  
0.7119  
0.6970  
0.6899  
0.6708

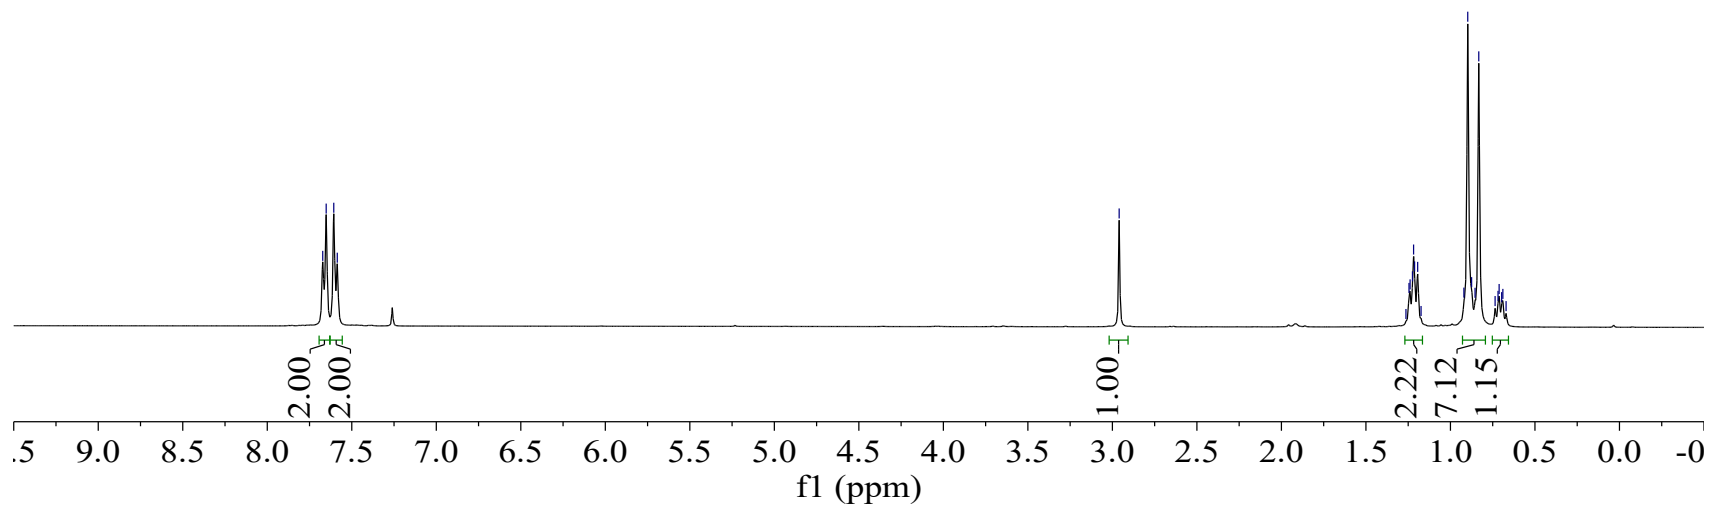

<sup>1</sup>H NMR spectrum of compound **1i**

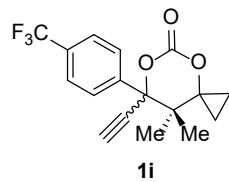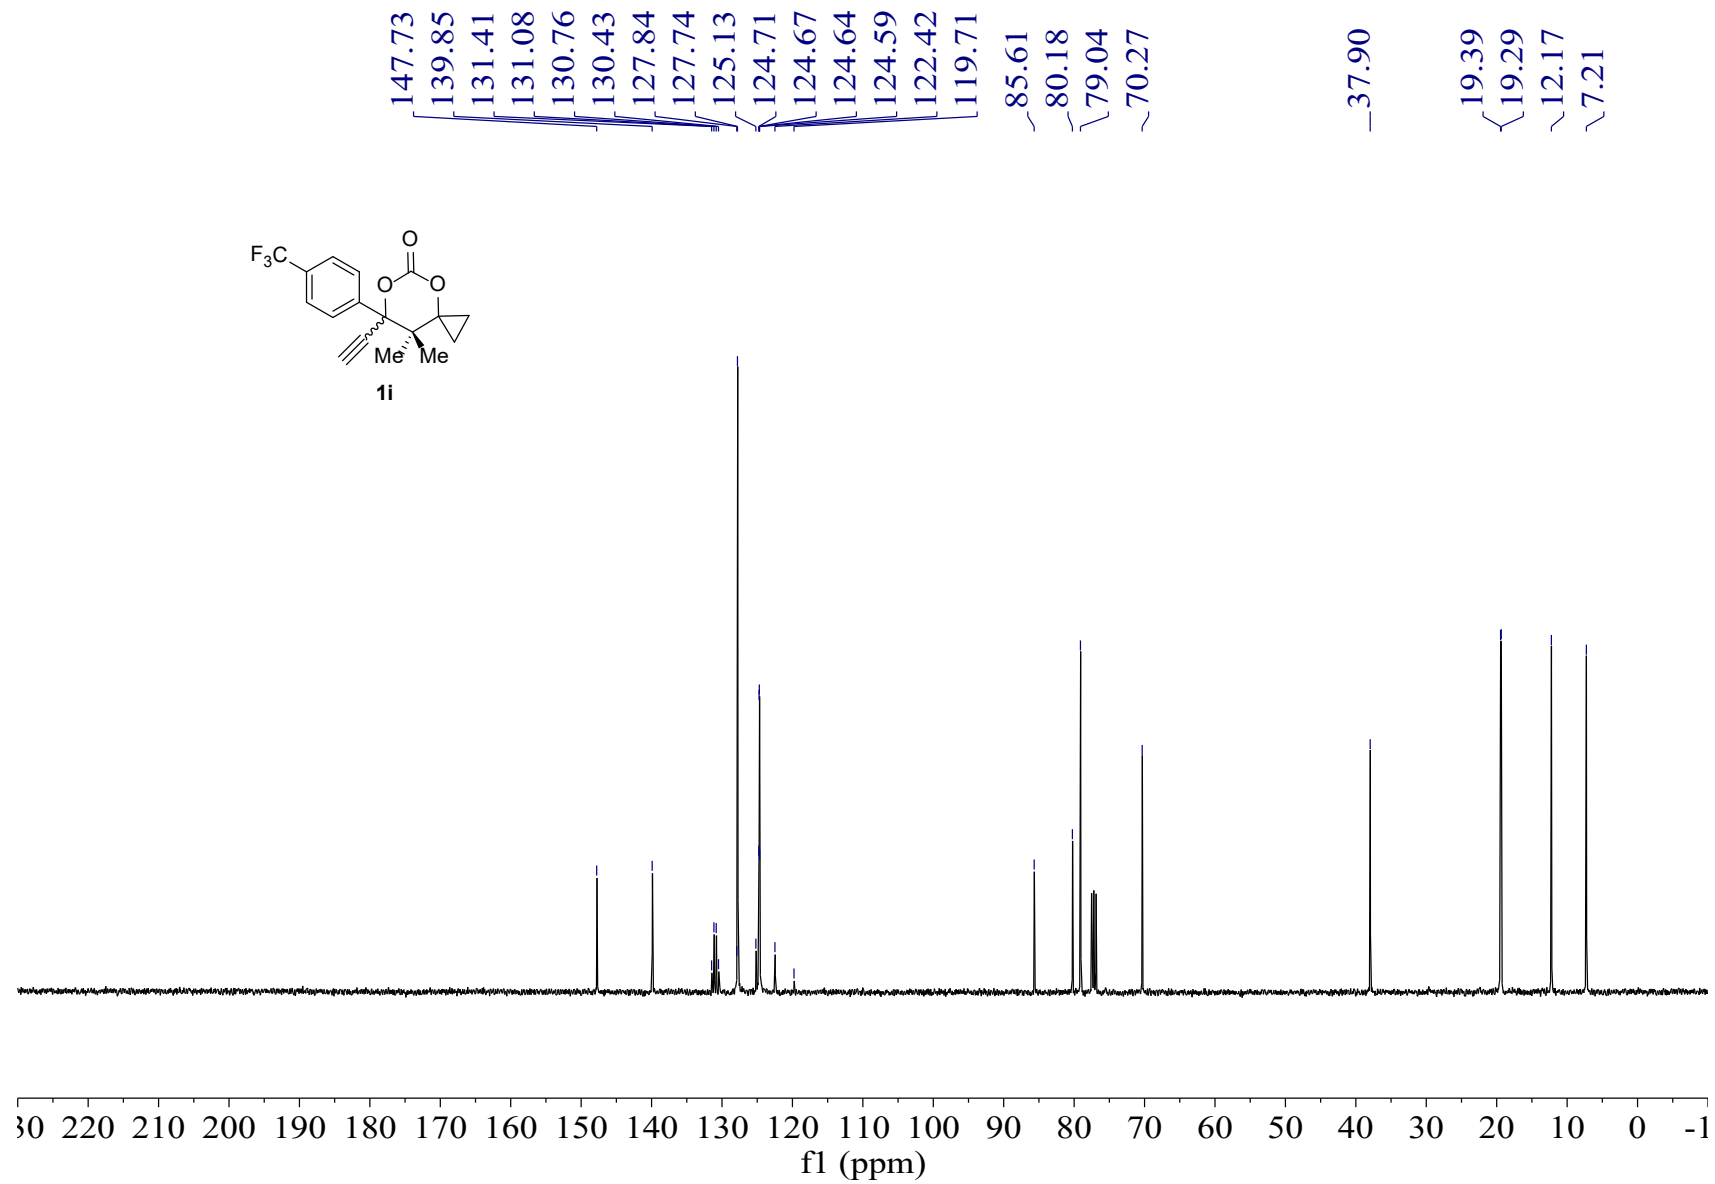

<sup>13</sup>C NMR spectrum of compound **1i**

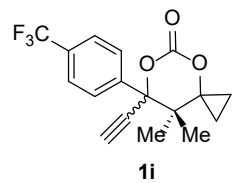

--62.76

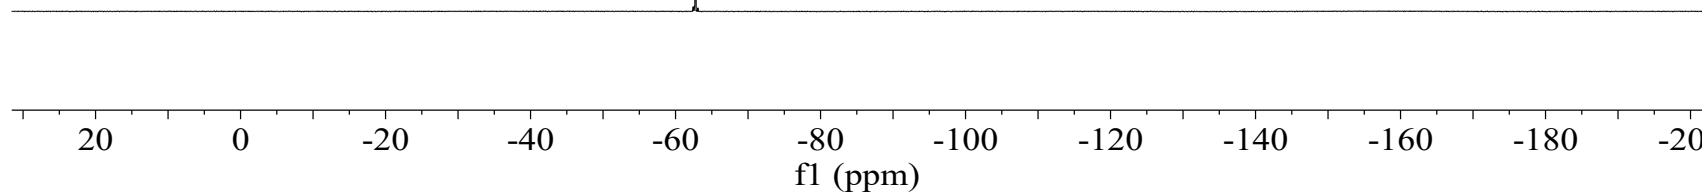

$^{19}\text{F}$  NMR spectrum of compound **1i**

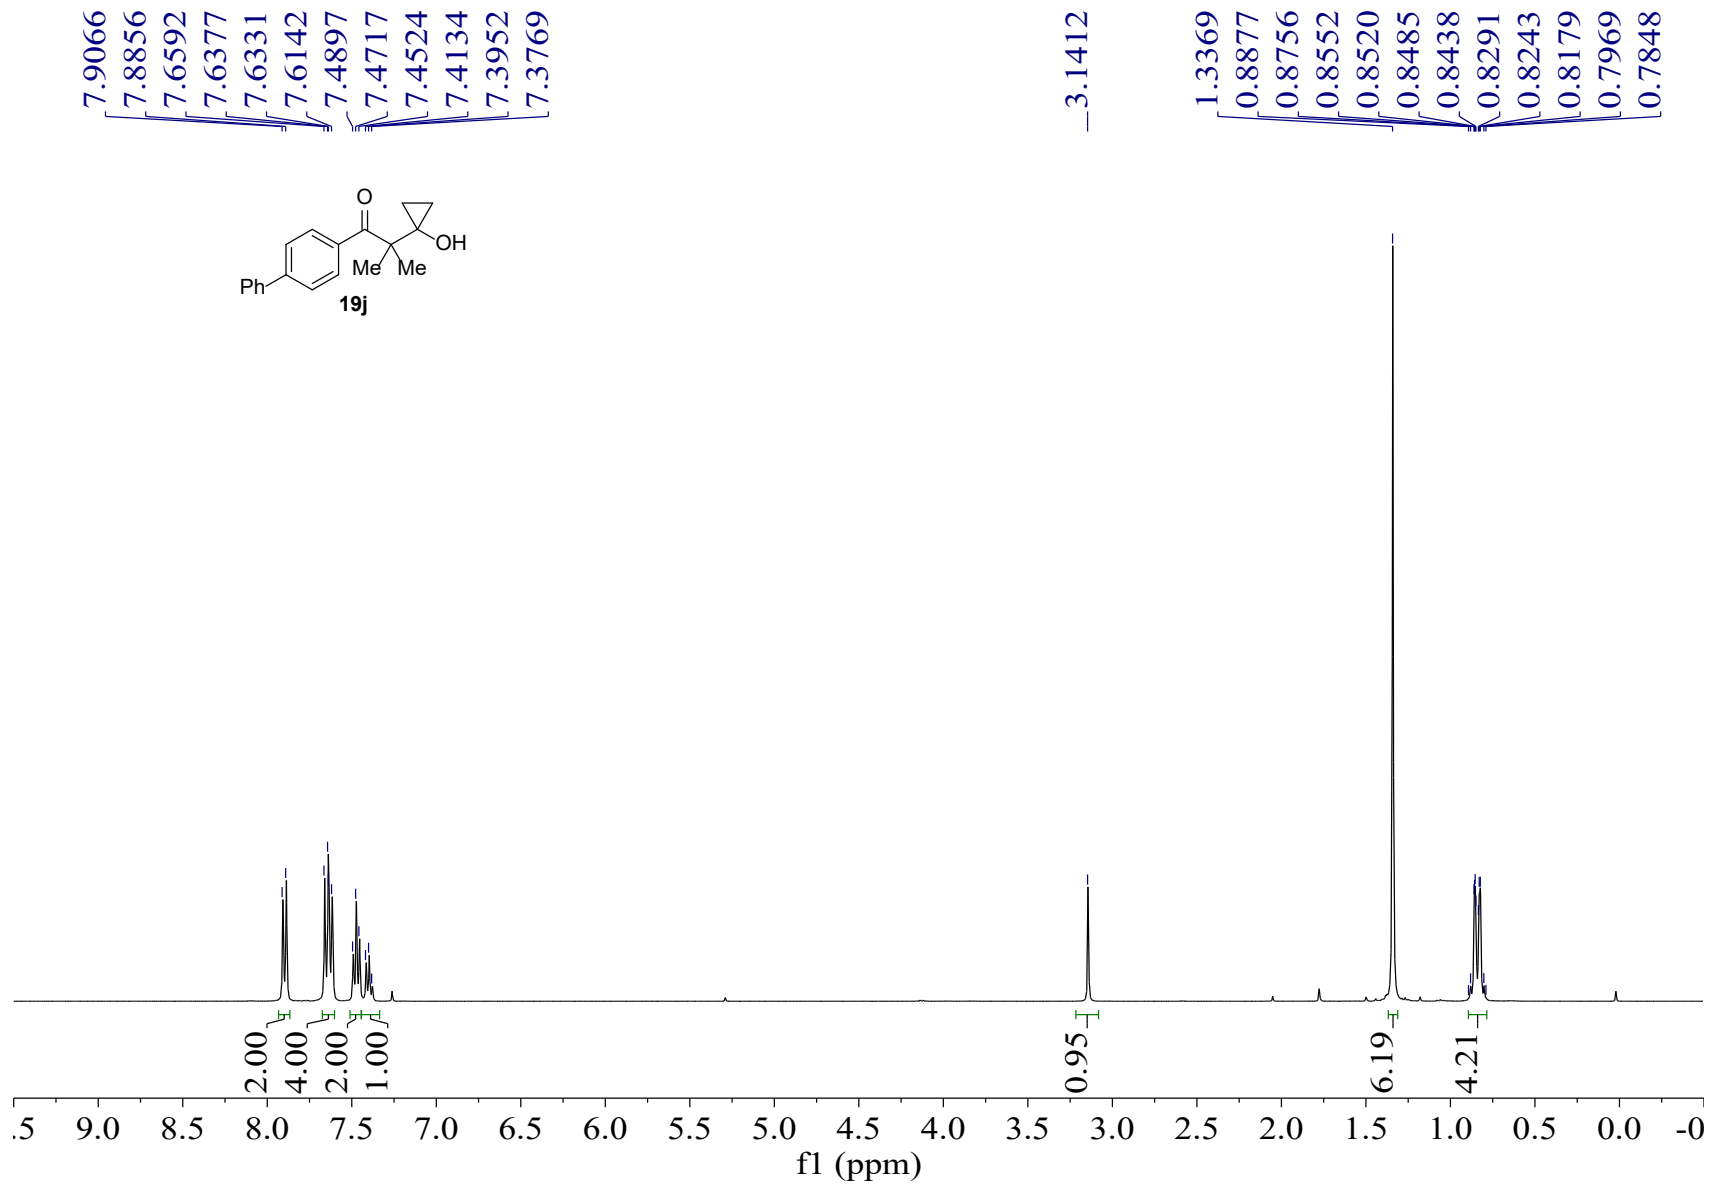

<sup>1</sup>H NMR spectrum of compound **19j**

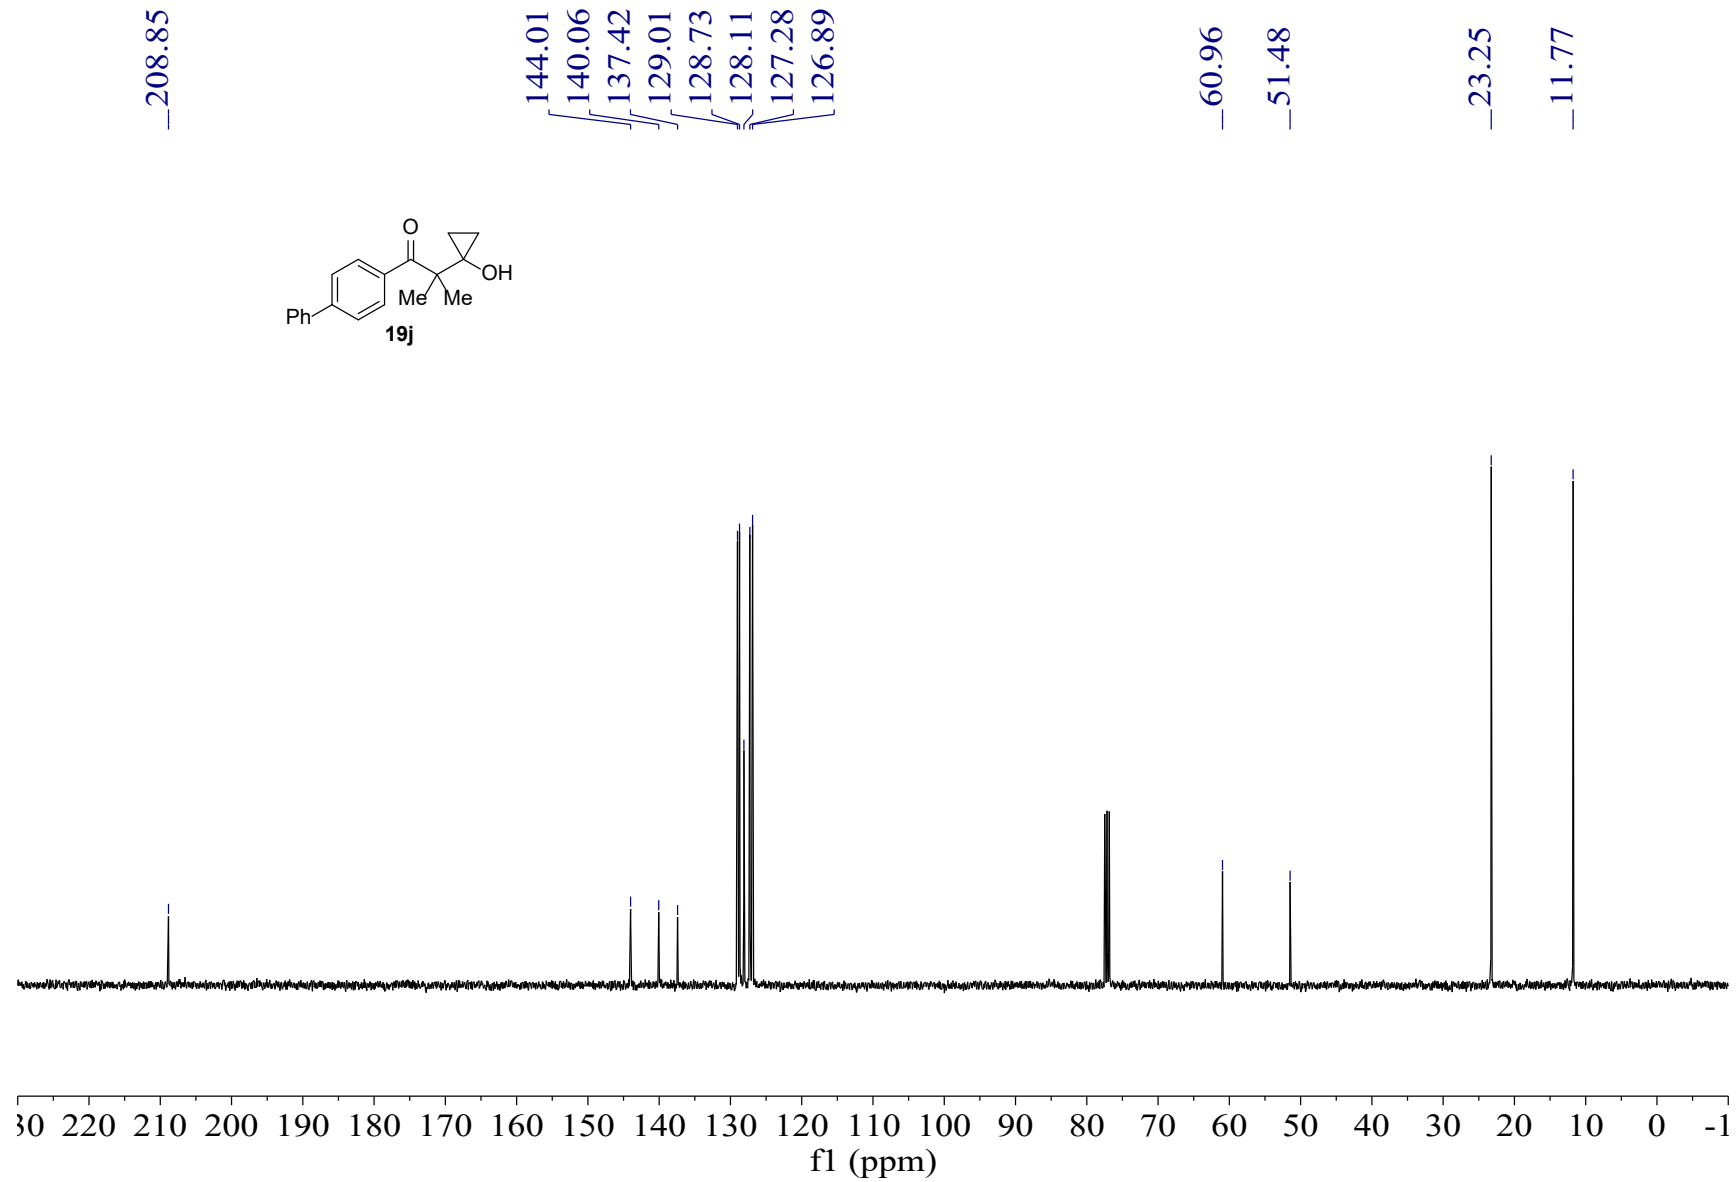

<sup>13</sup>C NMR spectrum of compound **19j**

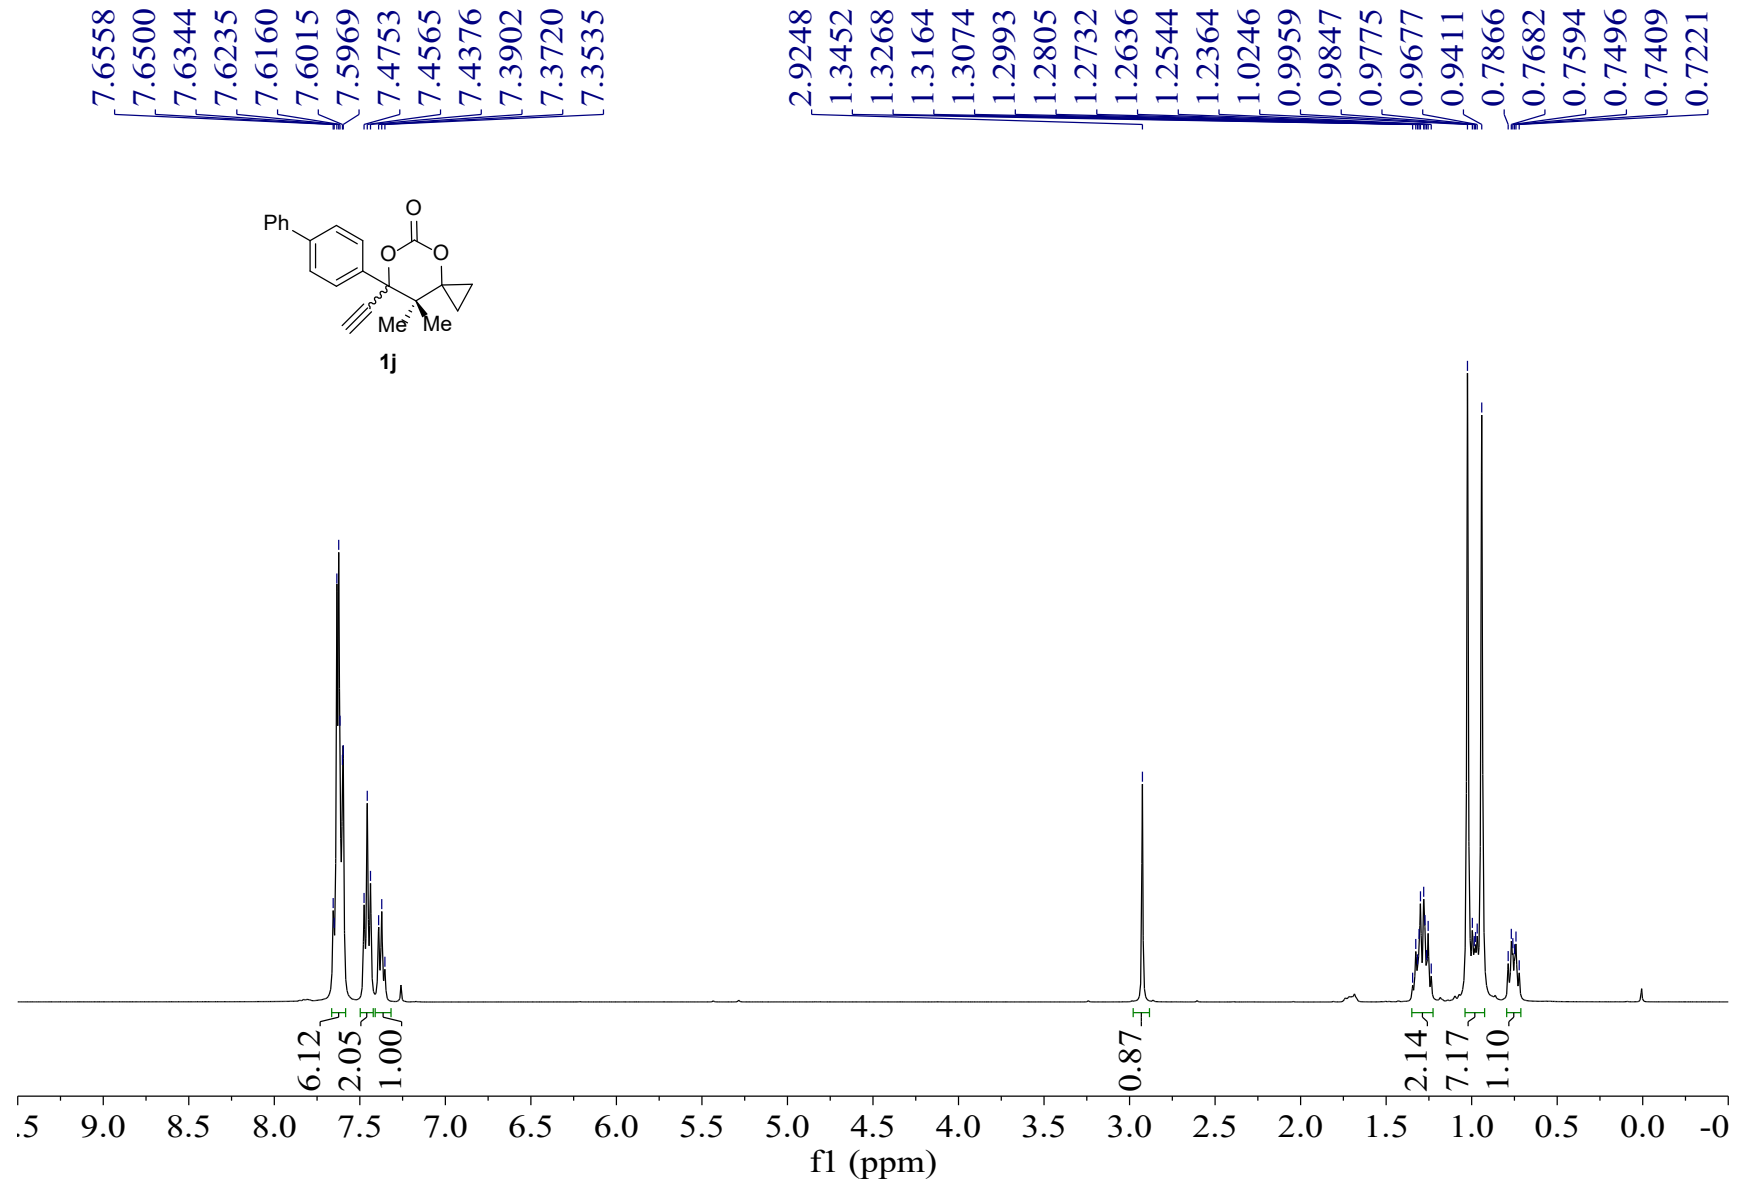

<sup>1</sup>H NMR spectrum of compound **1j**



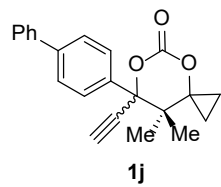

148.37  
141.73  
140.14  
134.91  
128.96  
127.80  
127.78  
127.19  
126.41

86.18  
81.02  
78.40  
70.29

38.09

19.77  
19.62  
12.25  
7.46

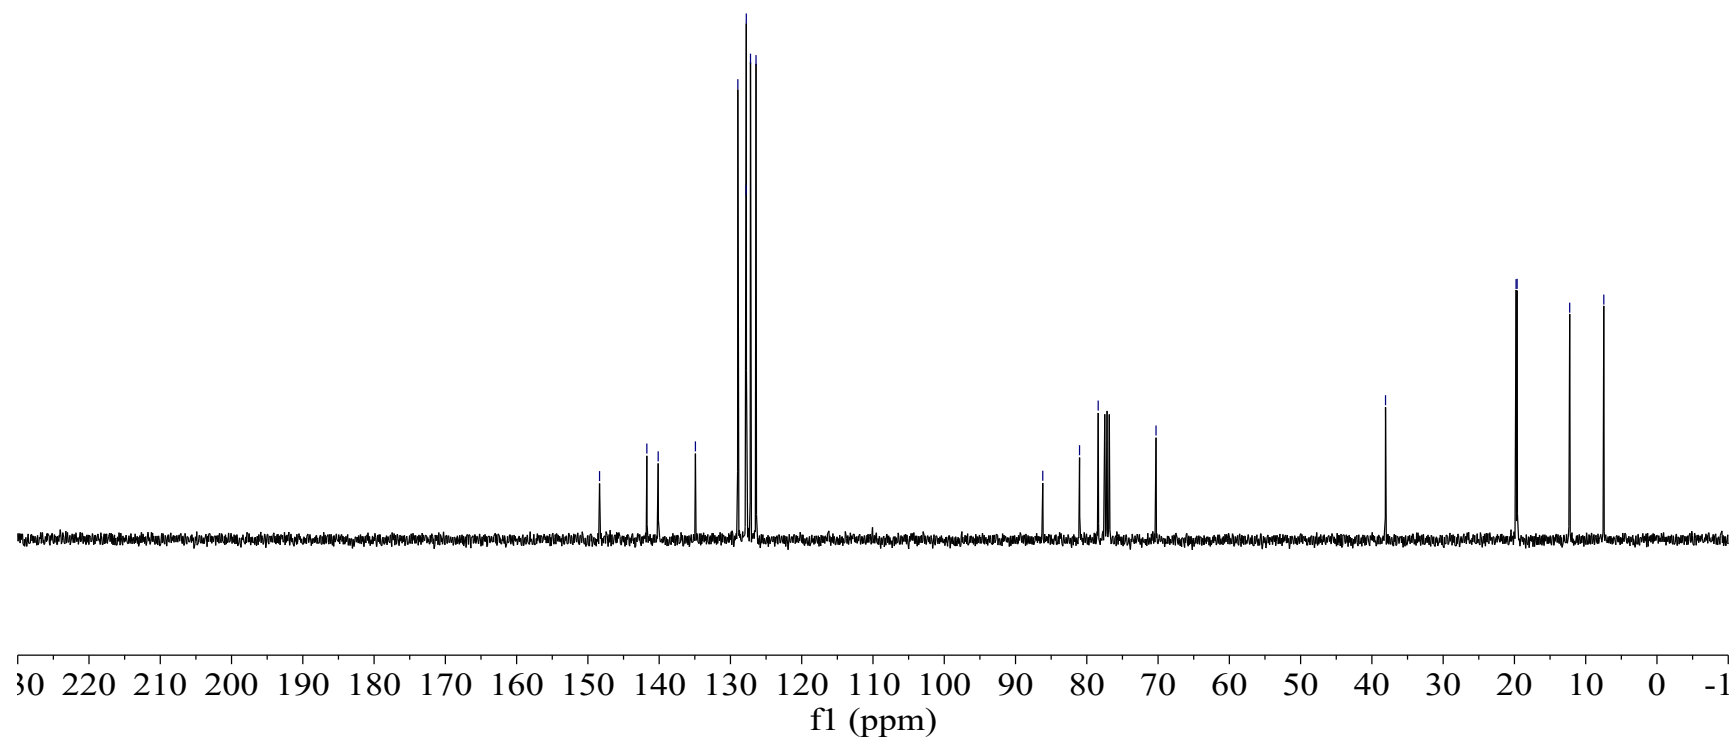

<sup>13</sup>C NMR spectrum of compound **1j**

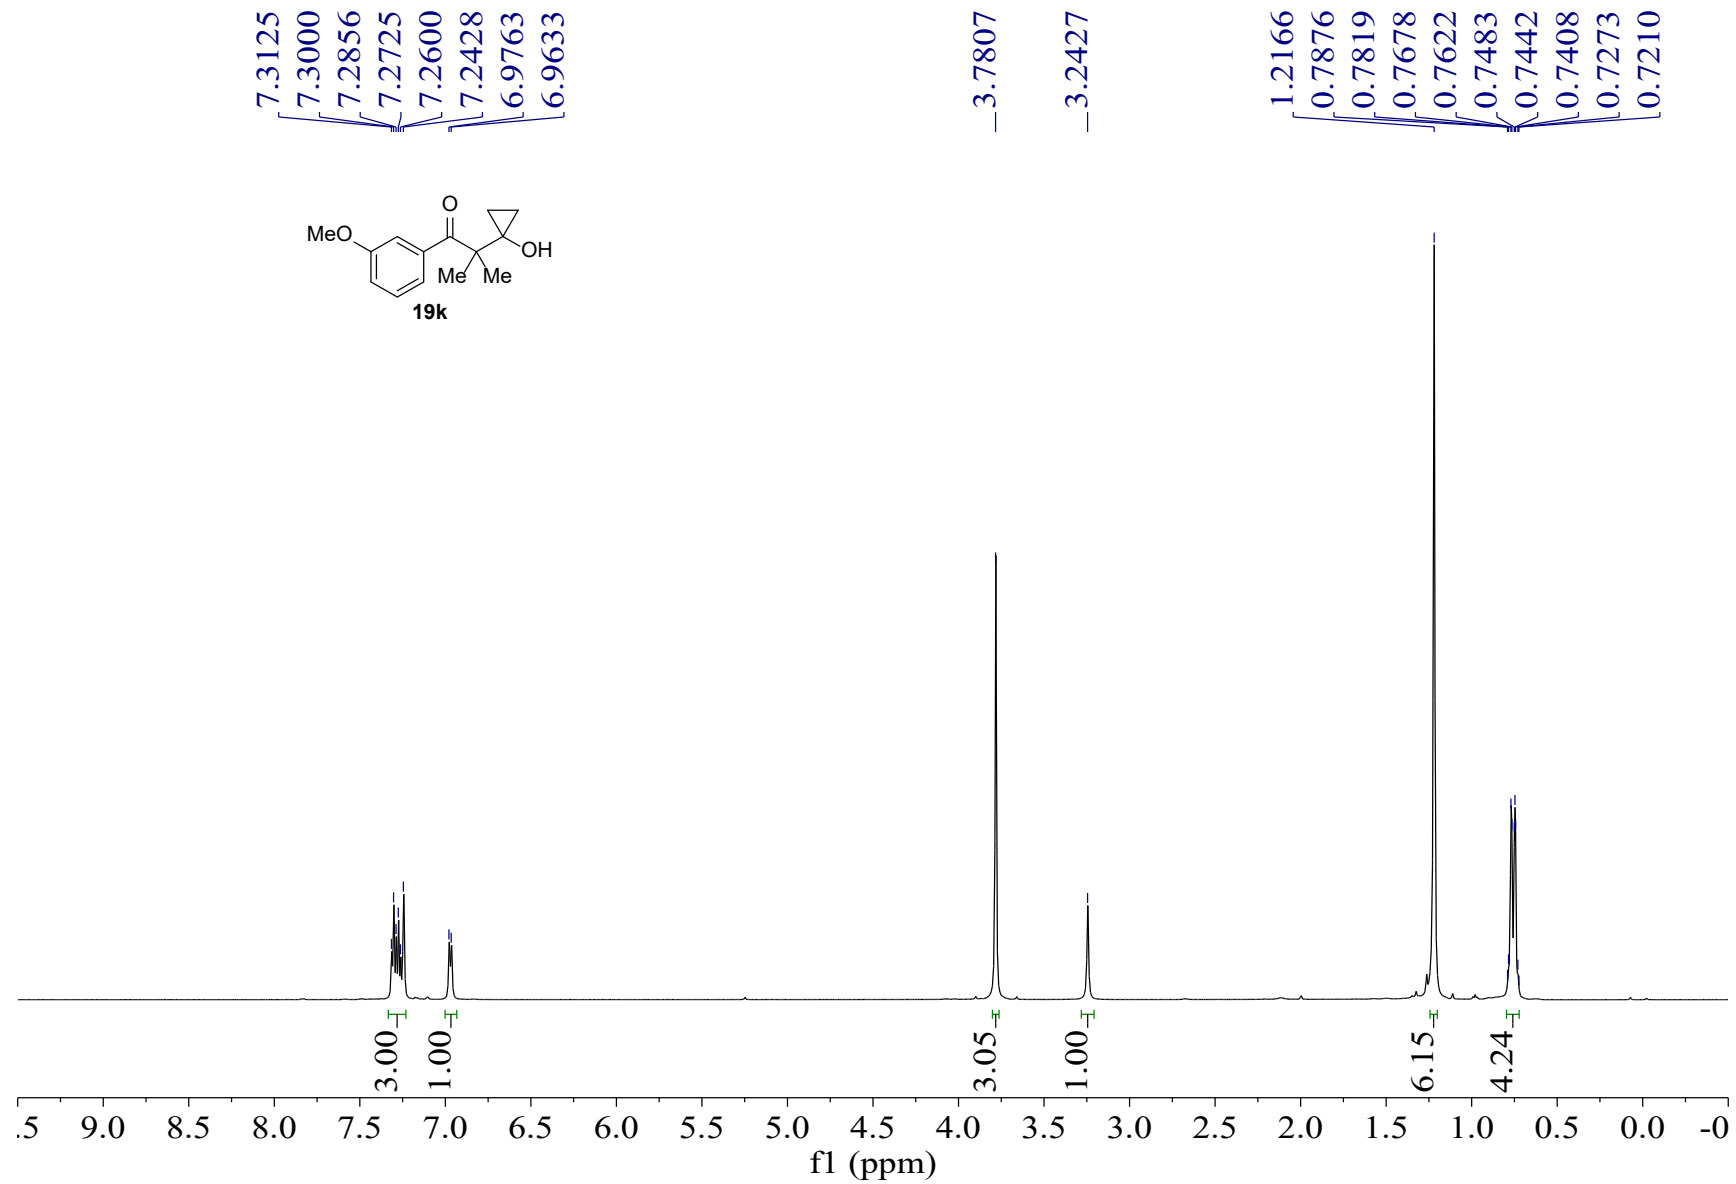

<sup>1</sup>H NMR spectrum of compound **19k**

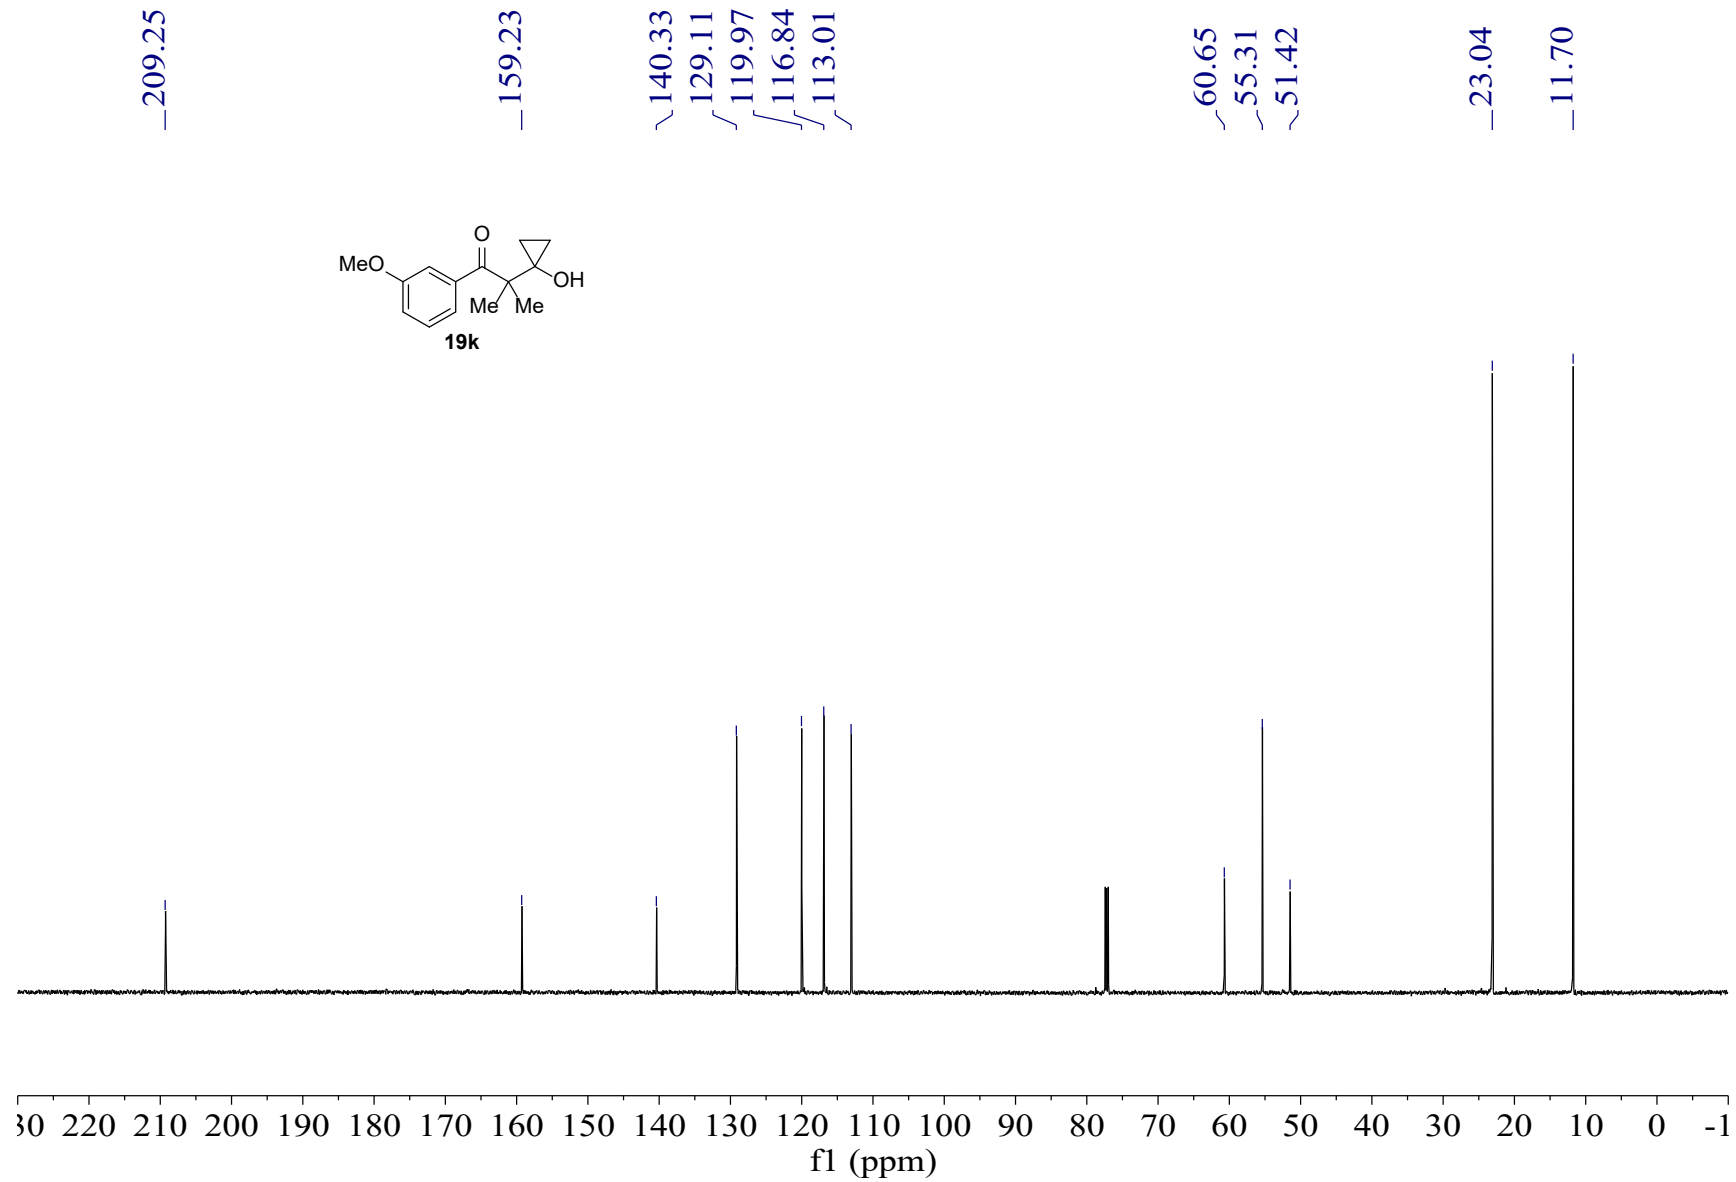

<sup>13</sup>C NMR spectrum of compound **19k**

7.2596  
7.2399  
7.2198  
7.0940  
7.0744  
7.0425  
6.8630  
6.8429

3.7517  
2.8751  
1.2432  
1.2253  
1.2194  
1.2043  
1.1981  
1.1925  
1.1746  
1.1551  
0.9184  
0.8910  
0.8814  
0.8710  
0.8638  
0.8403  
0.7179  
0.7009  
0.6940  
0.6796  
0.6747  
0.6704  
0.6533

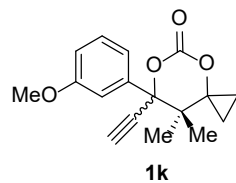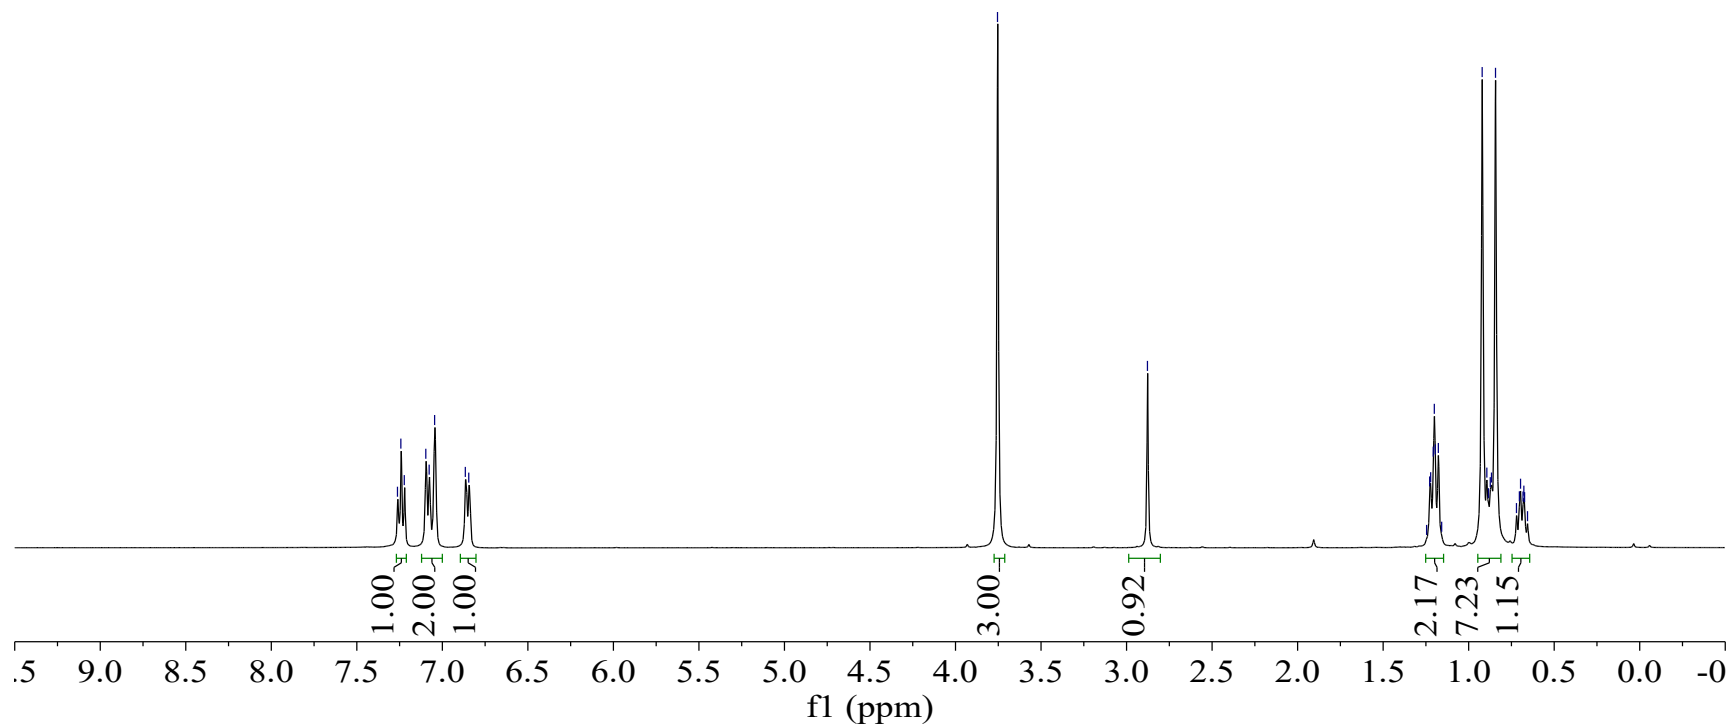

<sup>1</sup>H NMR spectrum of compound **1k**

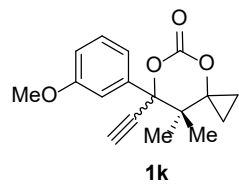

158.83  
148.15  
137.26  
128.63  
119.56  
113.53

85.93  
80.75  
78.26  
70.17

55.30

37.82

19.58  
19.49  
12.11  
7.25

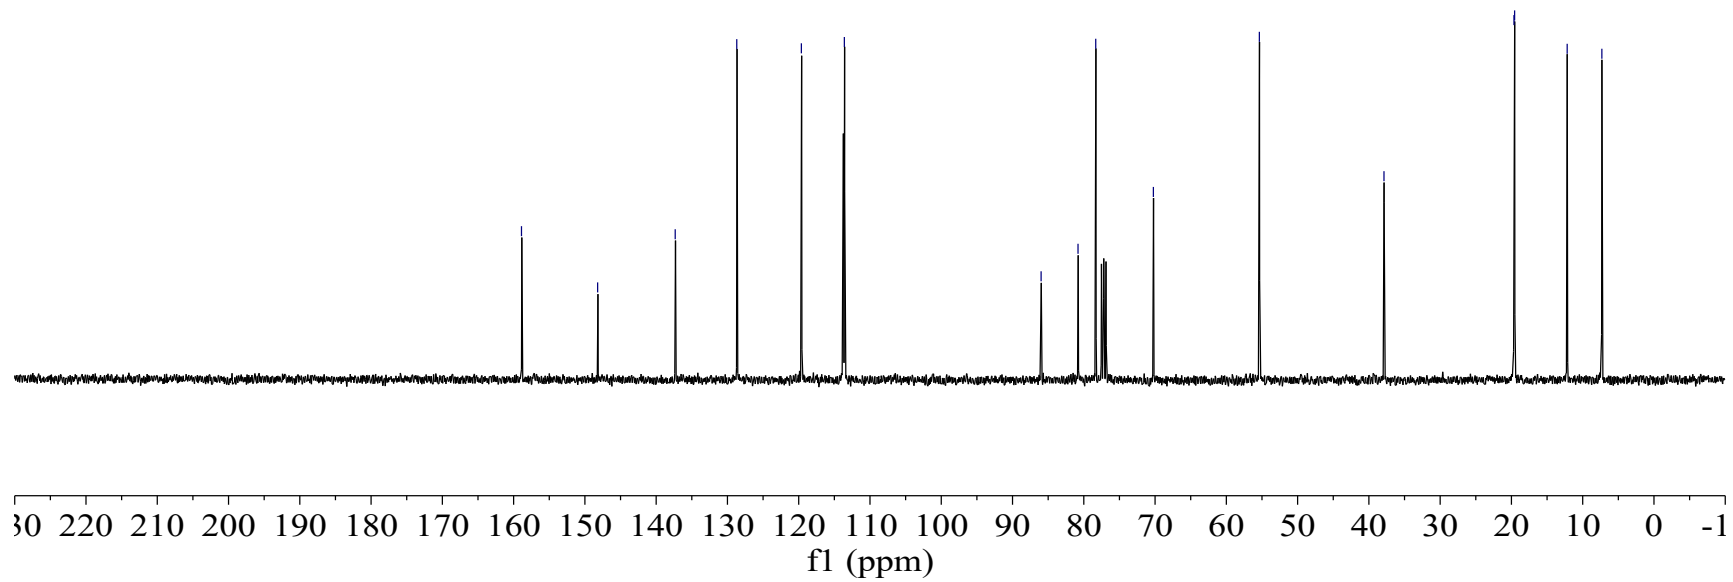

<sup>13</sup>C NMR spectrum of compound **1k**

7.5066  
7.4871  
7.4441  
7.4387  
7.4340  
7.4201  
7.4148  
7.4100  
7.3815  
7.3674  
7.3613  
7.3472  
7.3414  
7.3273  
7.1592  
7.1528  
7.1384  
7.1318  
7.1174  
7.1110

3.1592

1.2058  
0.8033  
0.7822  
0.7762  
0.7711  
0.7567  
0.7518  
0.7456  
0.7244

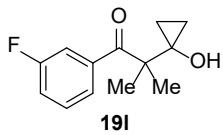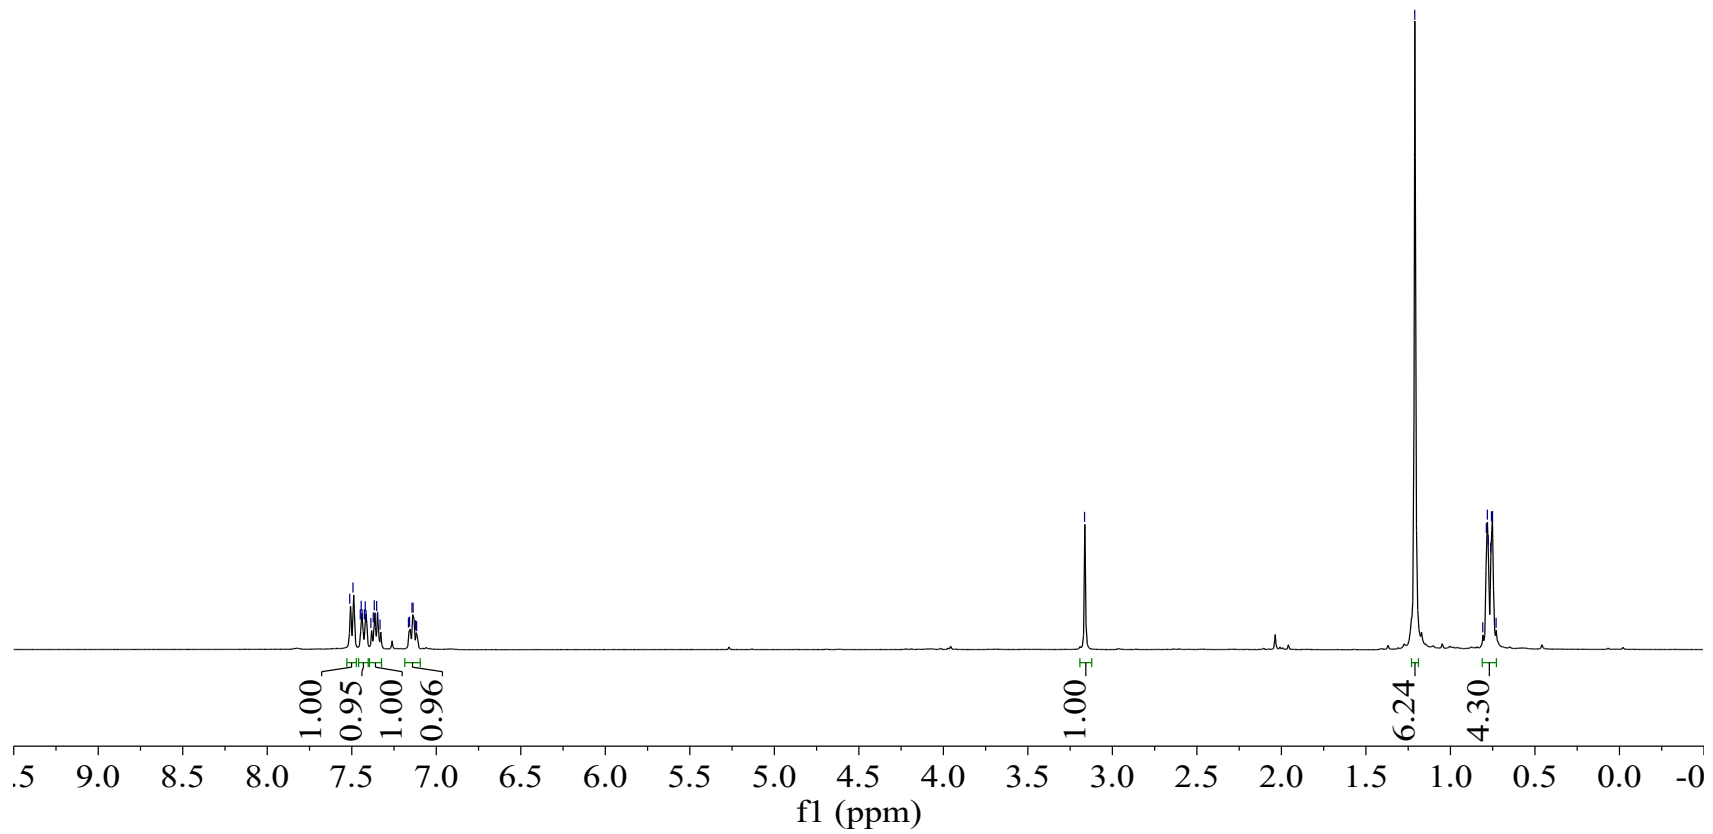

<sup>1</sup>H NMR spectrum of compound **191**

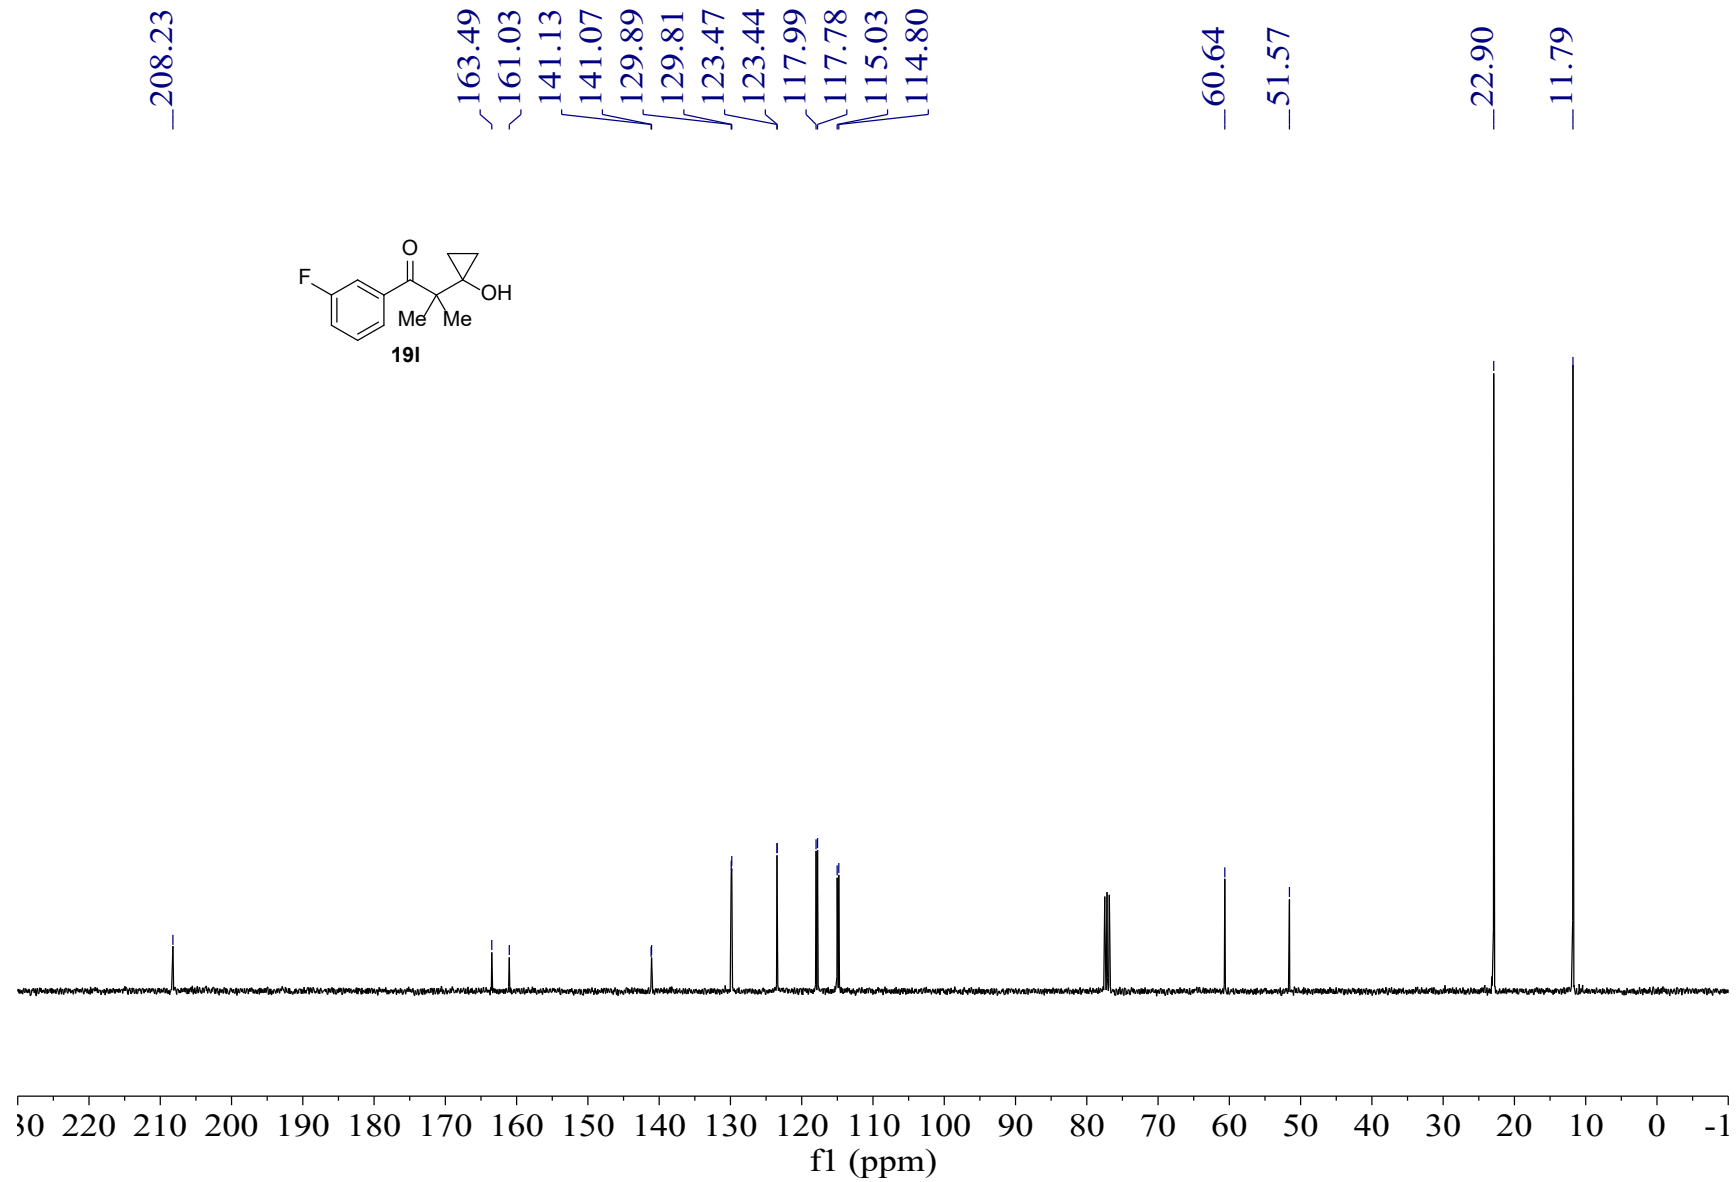

<sup>13</sup>C NMR spectrum of compound **19I**

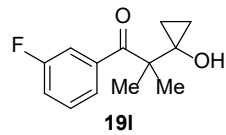

-112.09

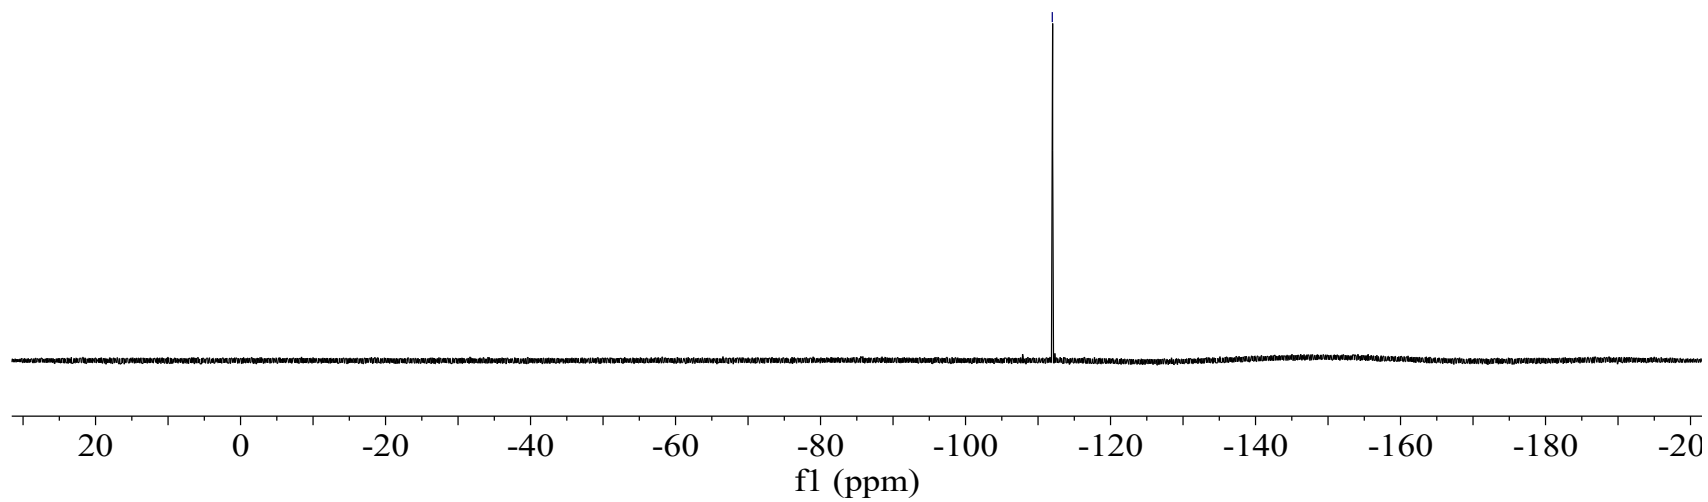

$^{19}\text{F}$  NMR spectrum of compound **19I**



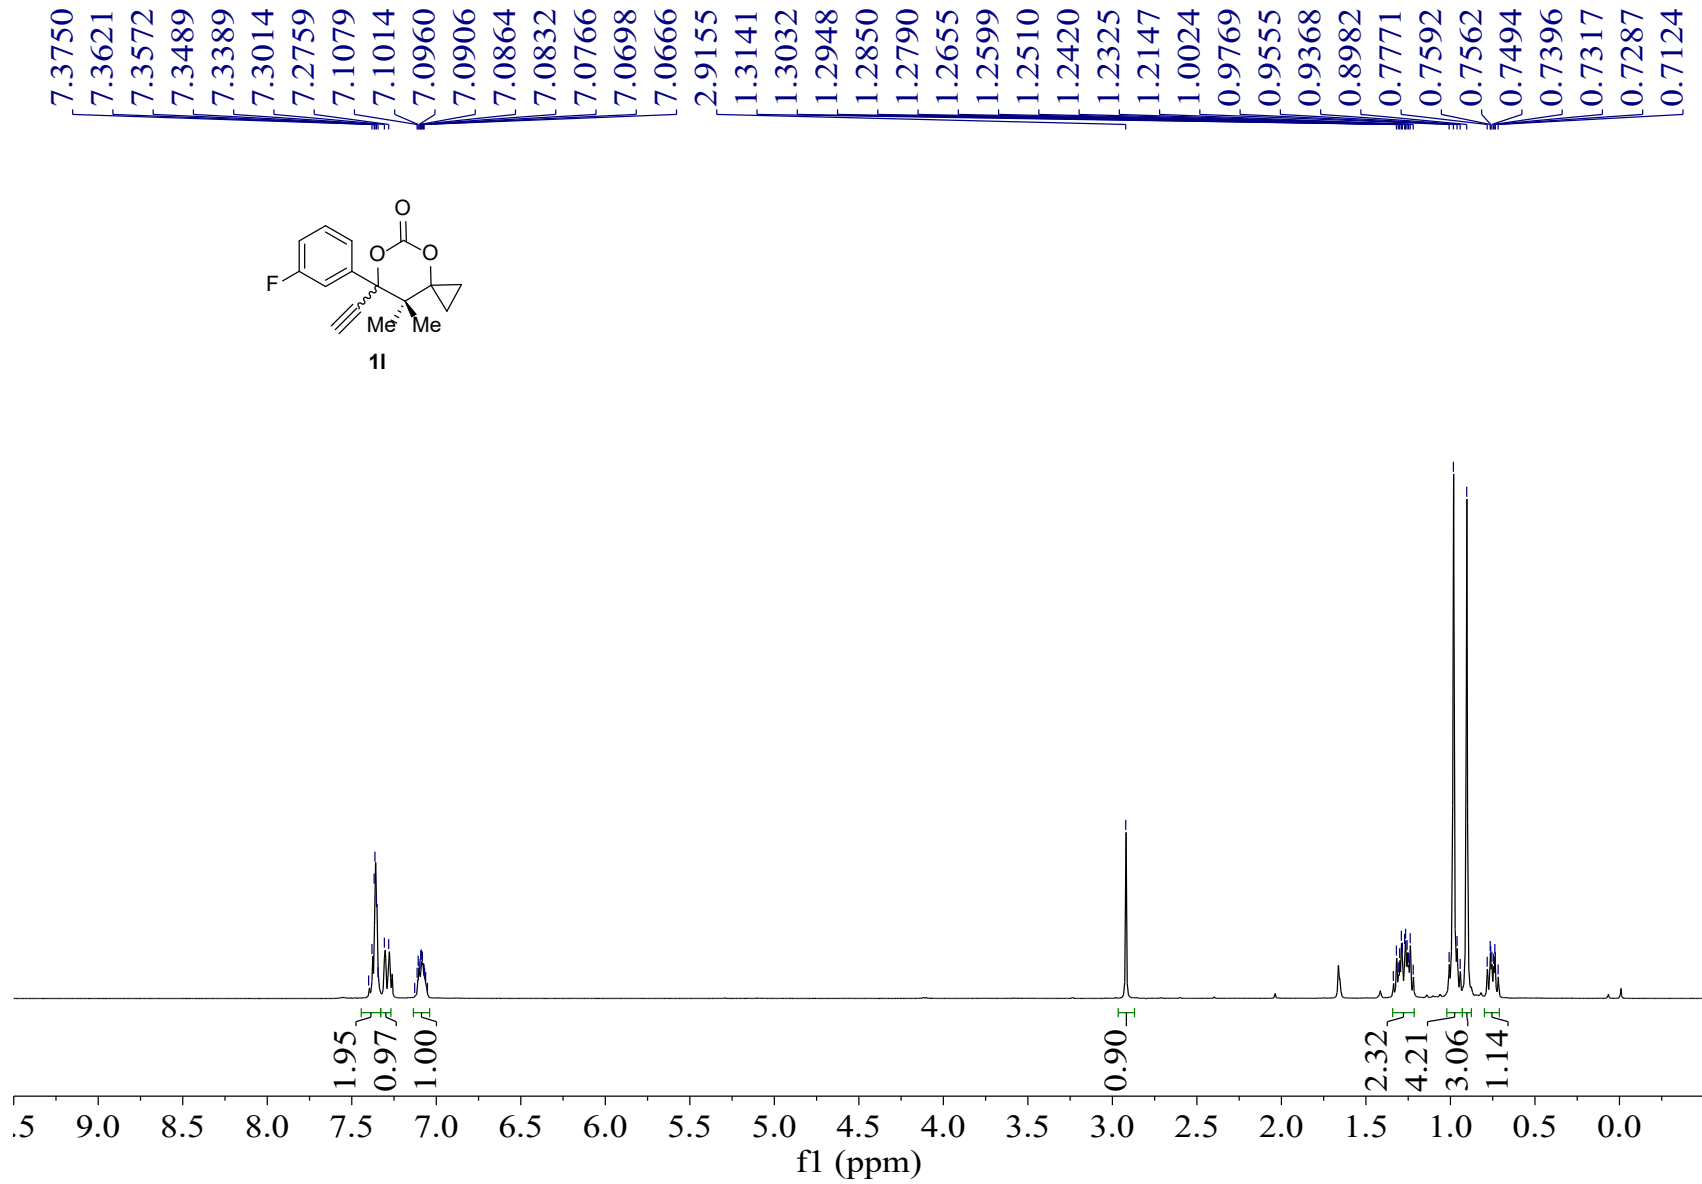

<sup>1</sup>H NMR spectrum of compound **11**

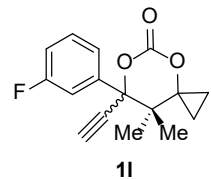

163.43  
 160.98  
 148.00  
 138.53  
 138.46  
 129.44  
 129.36  
 123.10  
 123.07  
 116.10  
 115.89  
 114.96  
 114.72  
 85.62  
 80.60  
 78.64  
 70.33  
 38.06  
 19.72  
 19.64  
 12.35  
 7.43

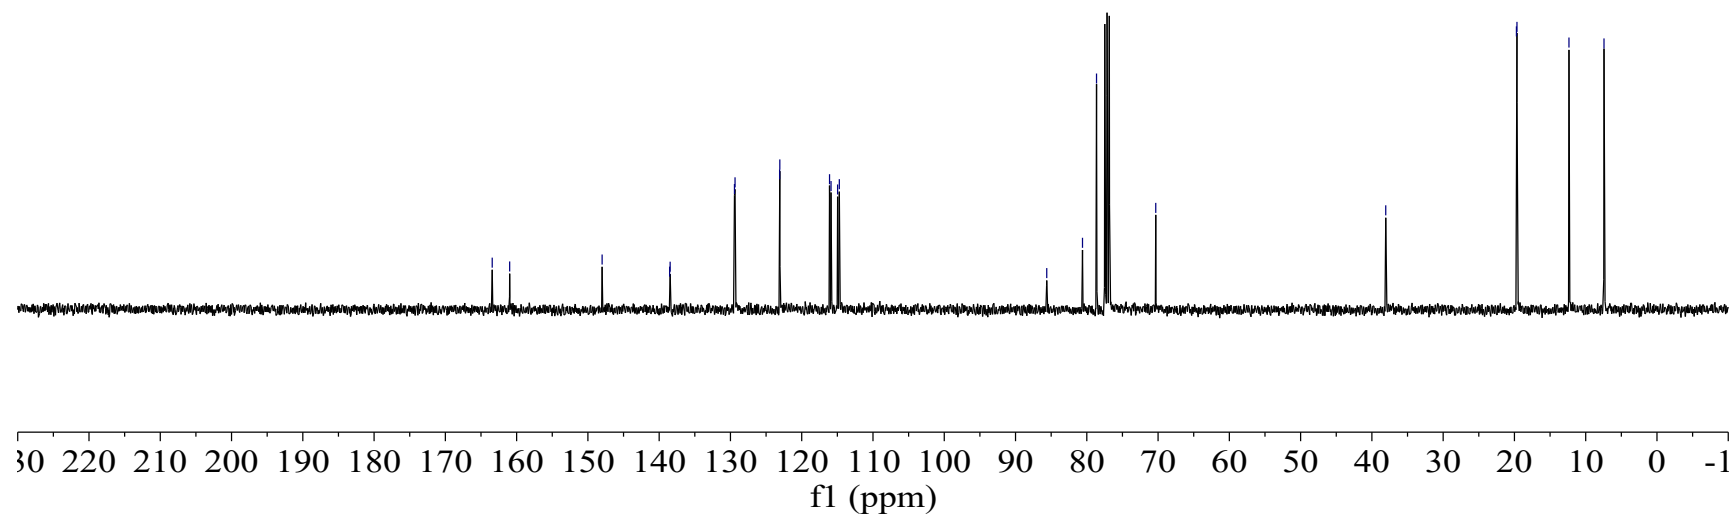

<sup>13</sup>C NMR spectrum of compound **11**

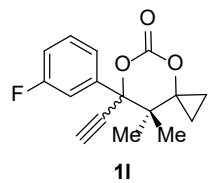

-112.53

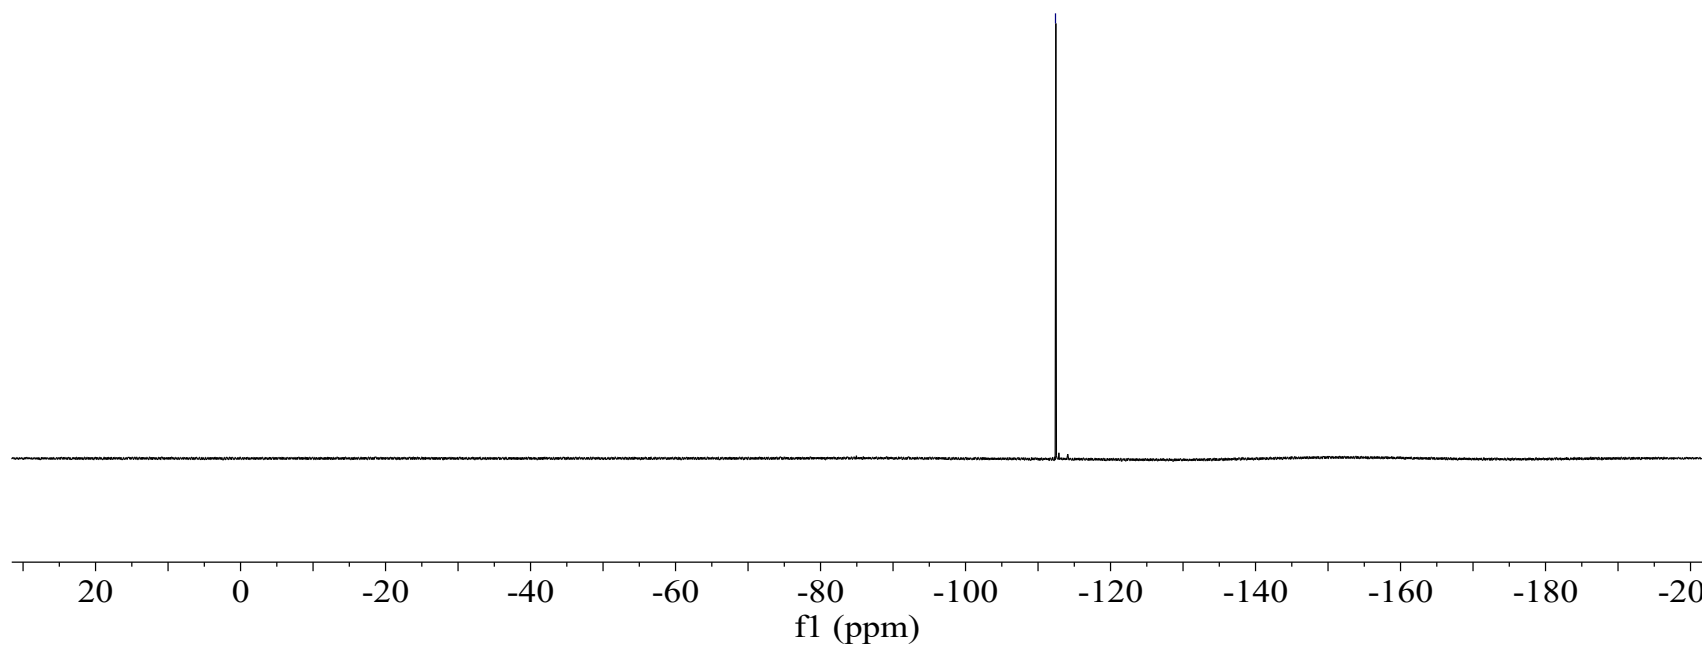

$^{19}\text{F}$  NMR spectrum of compound **11**

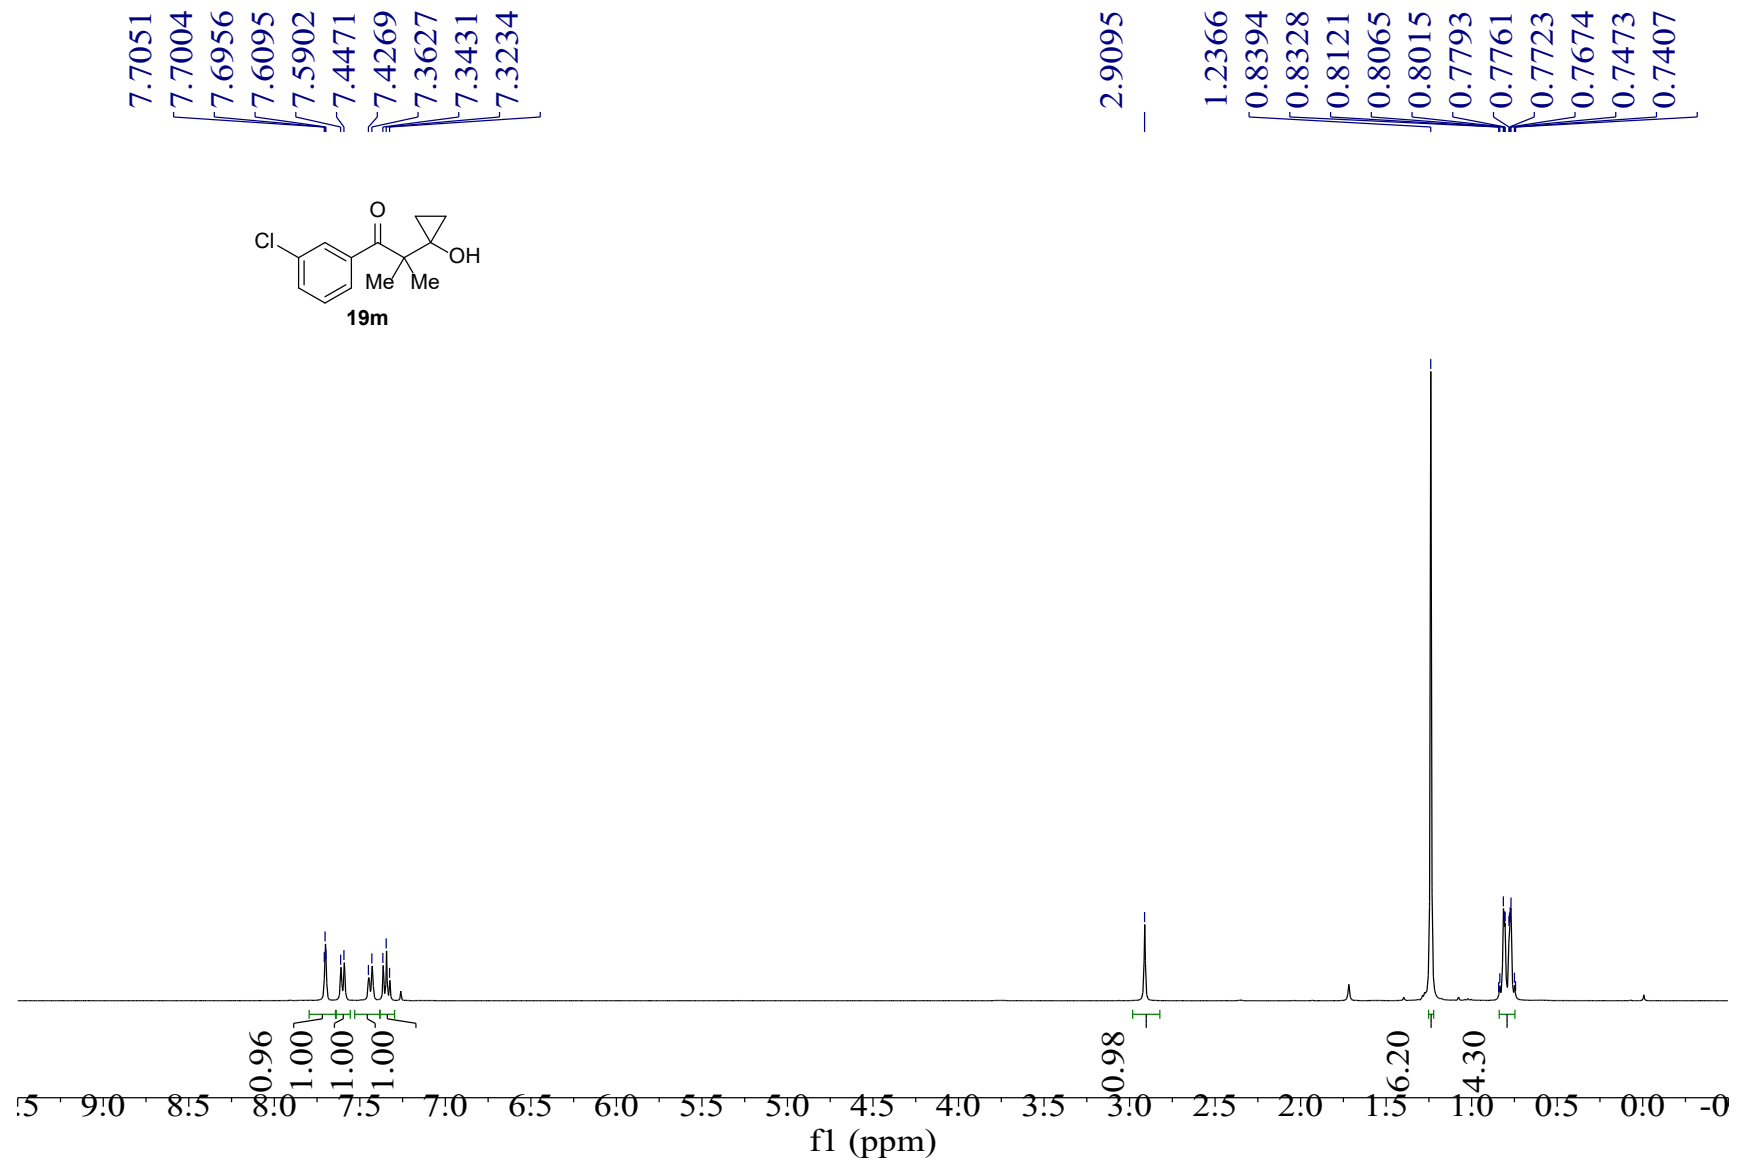

<sup>1</sup>H NMR spectrum of compound **19m**

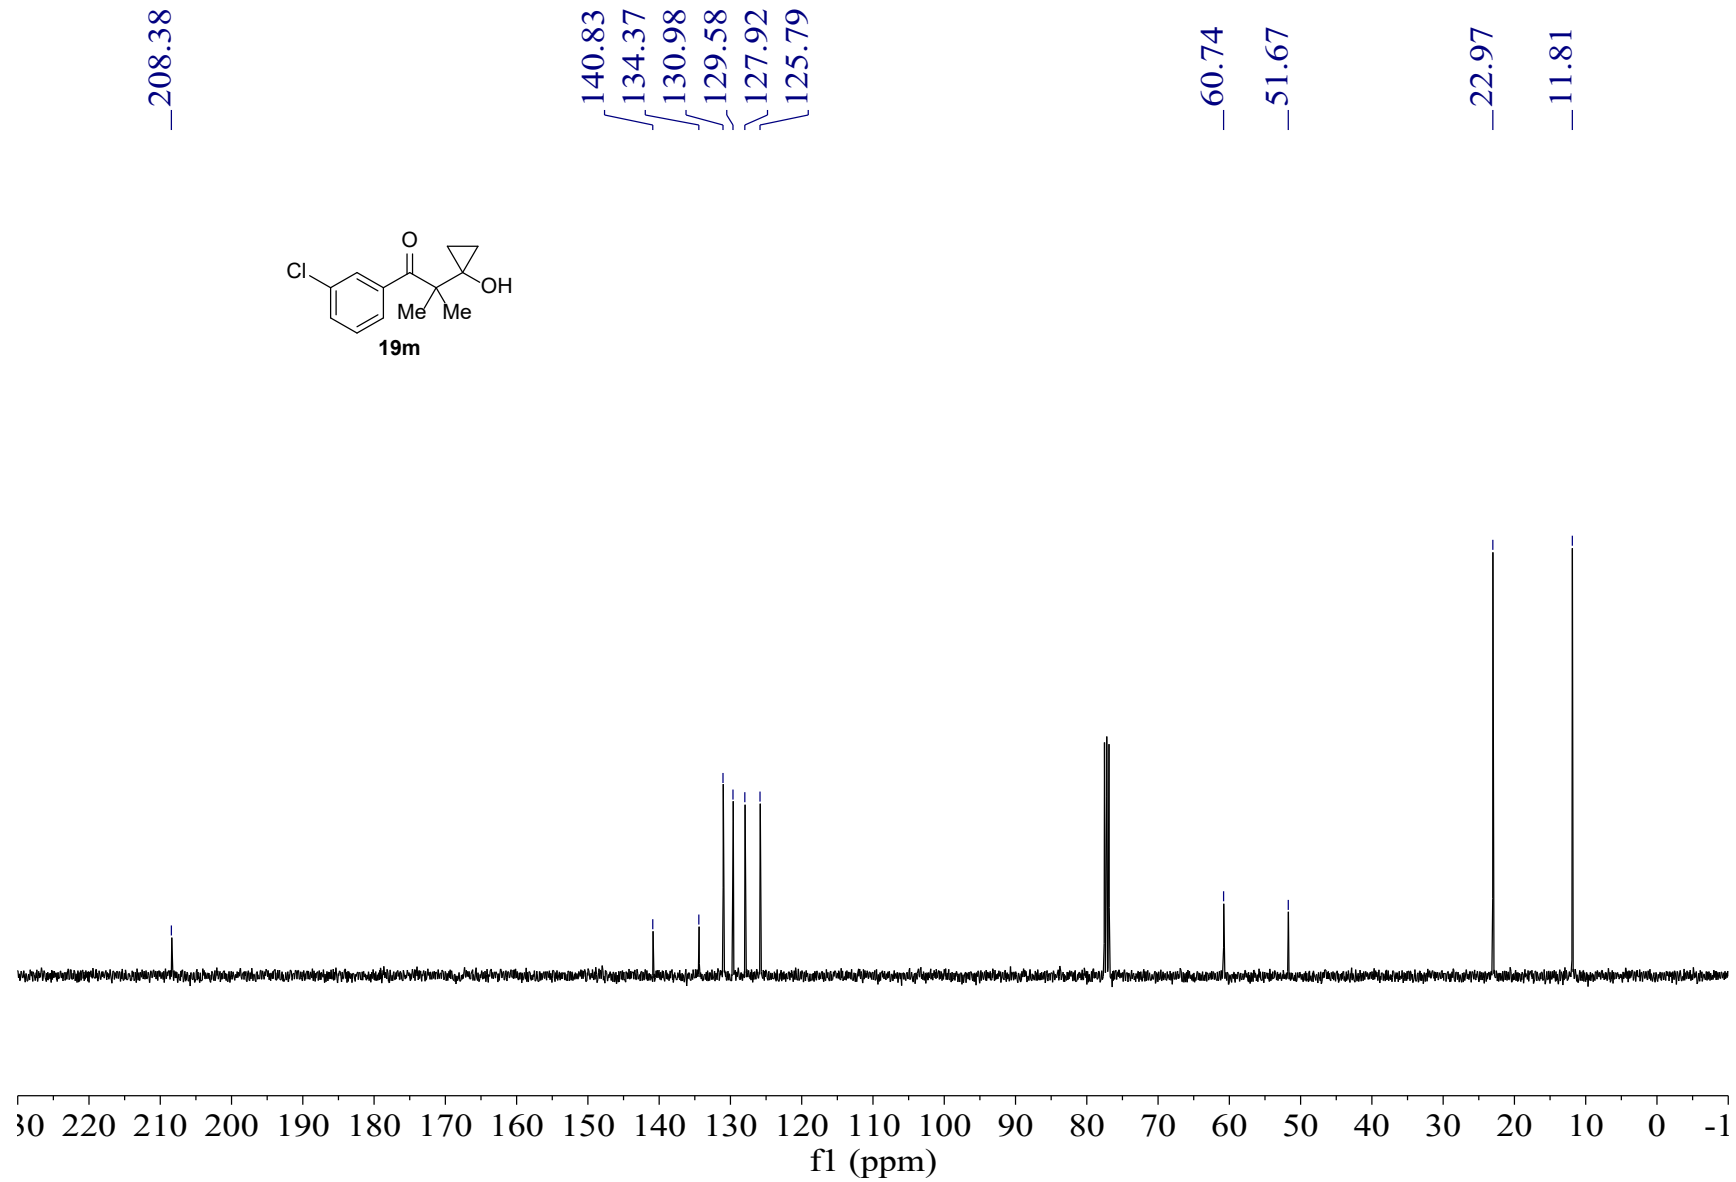

<sup>13</sup>C NMR spectrum of compound **19m**

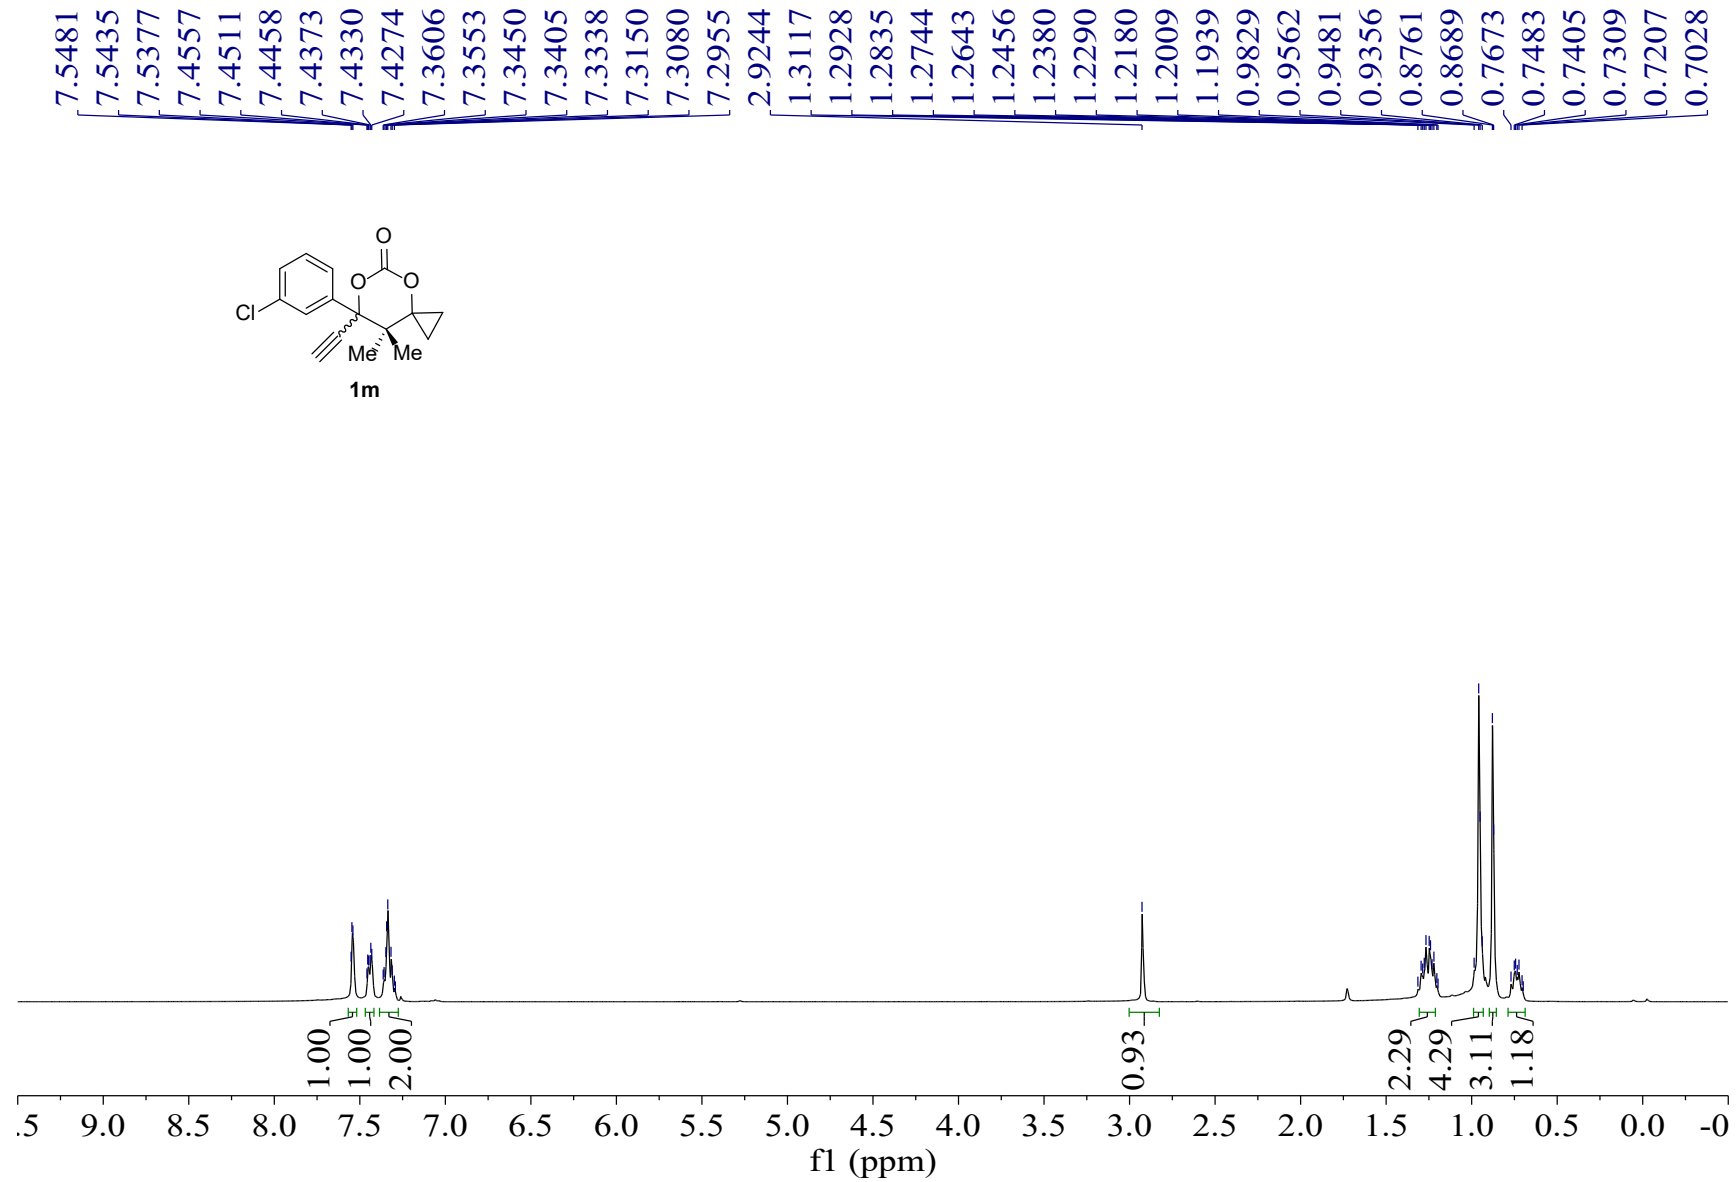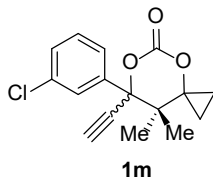

<sup>1</sup>H NMR spectrum of compound **1m**

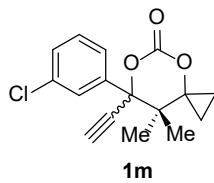

147.94  
 137.94  
 133.95  
 129.15  
 129.08  
 127.46  
 125.56

85.55  
 80.45  
 78.80  
 70.31

38.00

19.64  
 19.54  
 12.31  
 7.39

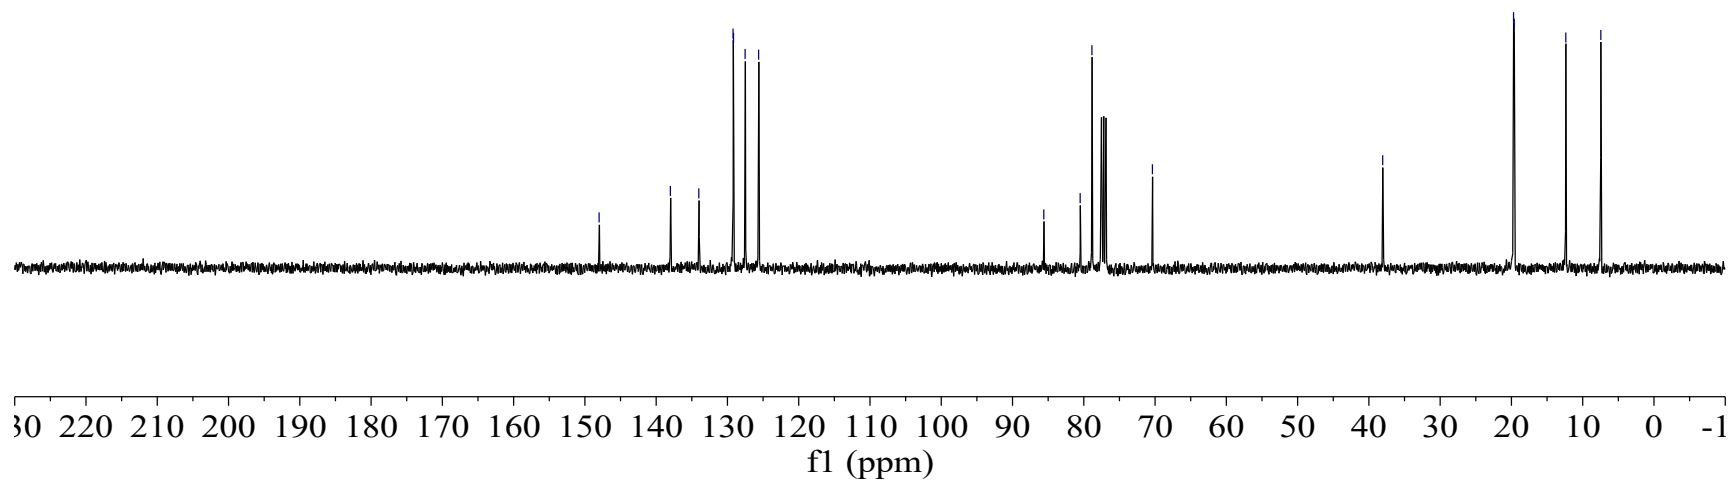

<sup>13</sup>C NMR spectrum of compound **1m**

7.8580  
7.6618  
7.6424  
7.6053  
7.5870  
7.3060  
7.2863  
7.2661

2.8935  
2.8738  
2.8495  
1.2379  
0.8423  
0.8373  
0.8206  
0.8167  
0.8116  
0.8079  
0.8050  
0.7829  
0.7772  
0.7743  
0.7712  
0.7677  
0.7515

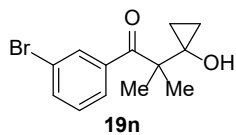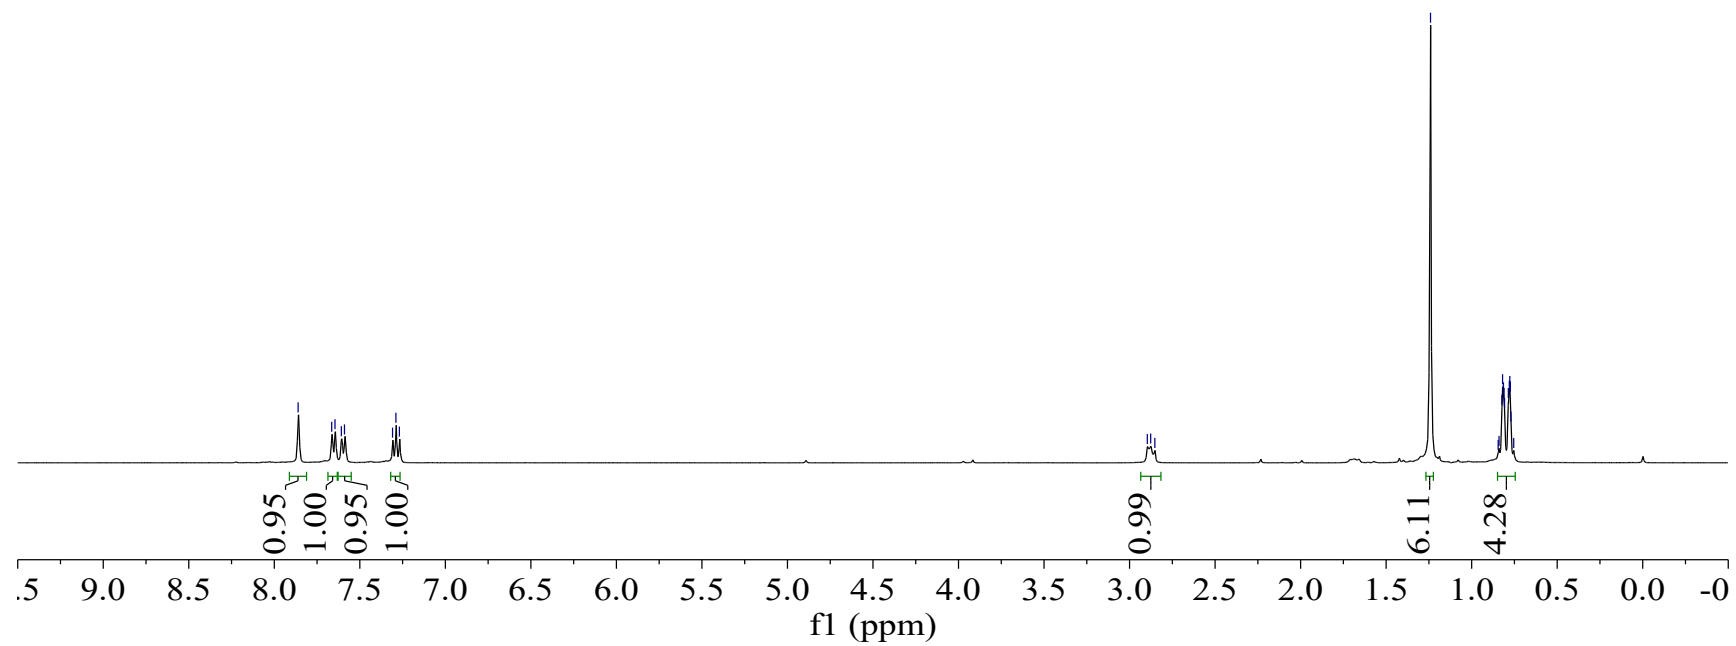

<sup>1</sup>H NMR spectrum of compound **19n**



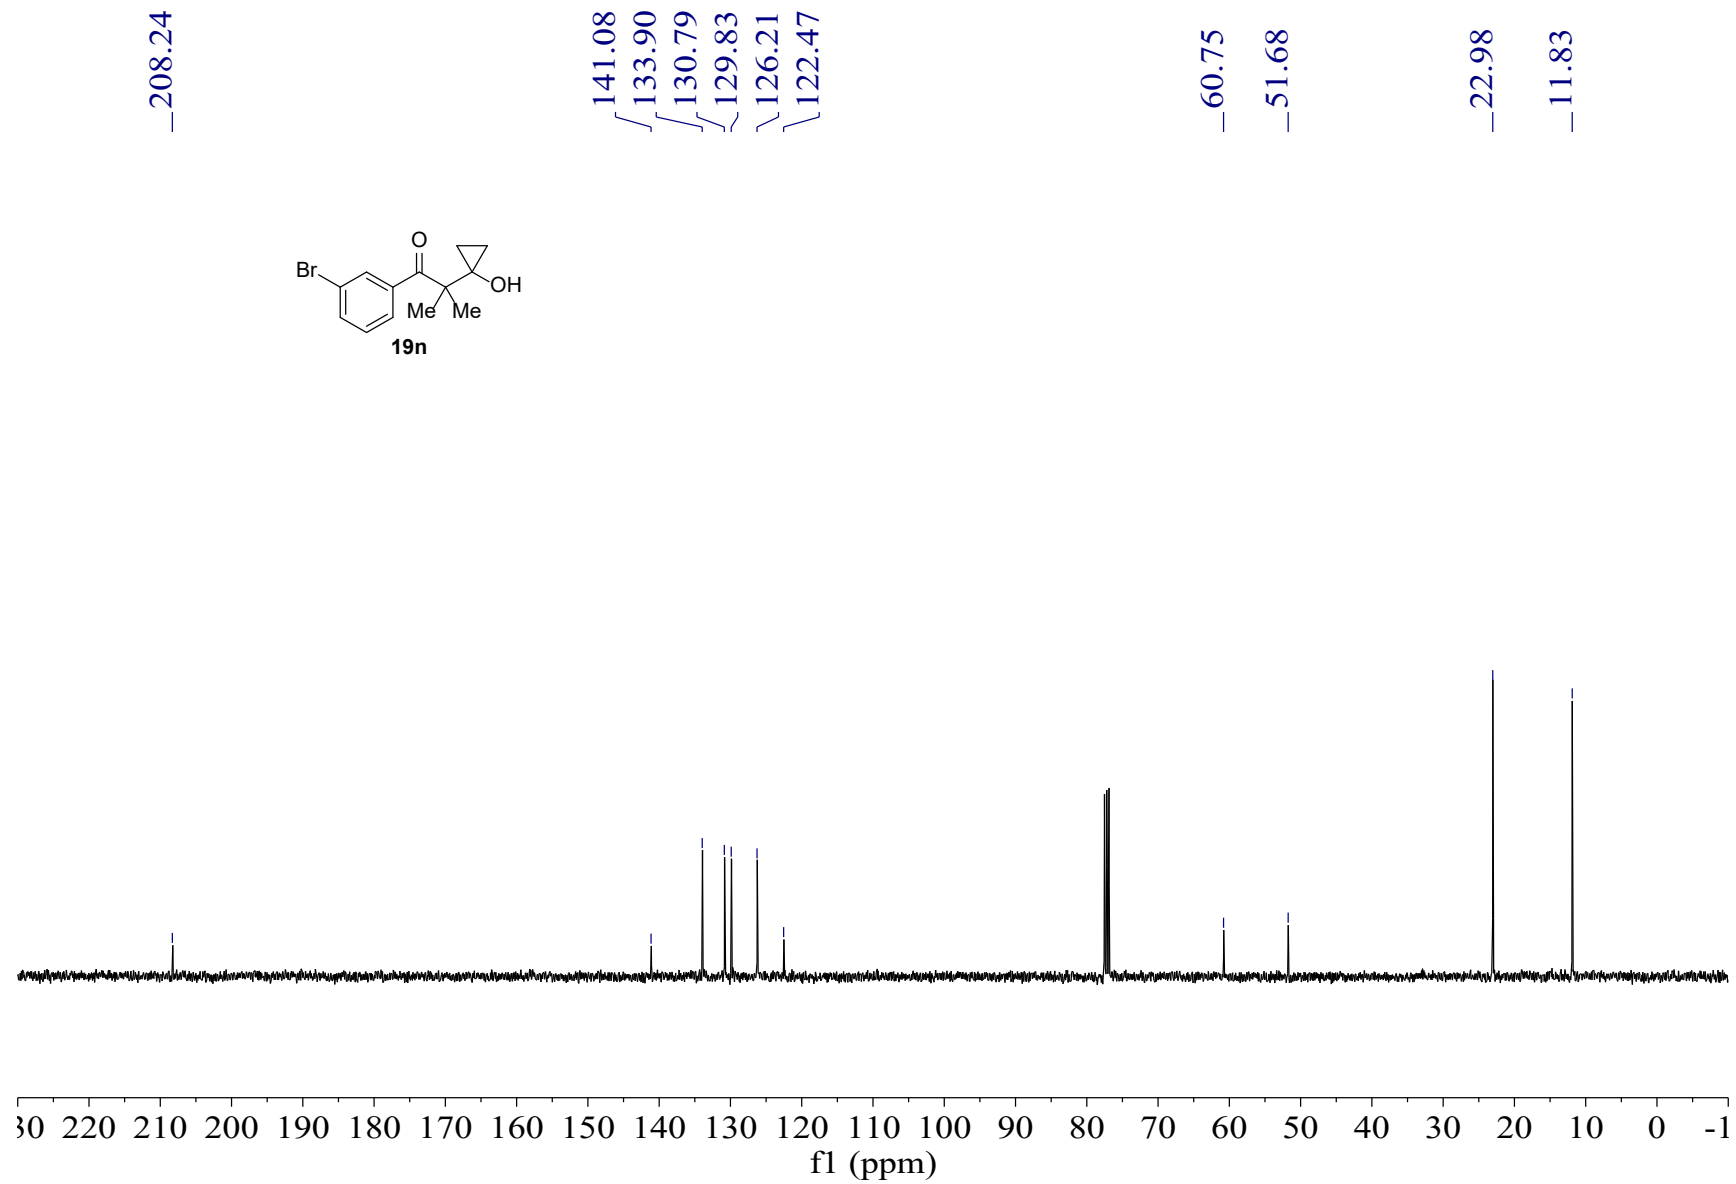

<sup>13</sup>C NMR spectrum of compound **19n**

7.5435  
7.5377  
7.4557  
7.4511  
7.4458  
7.4373  
7.4330  
7.4274  
7.3606  
7.3553  
7.3450  
7.3405  
7.3338  
7.3150  
7.3080  
7.2955  
7.2894

2.9244  
1.3117  
1.2928  
1.2835  
1.2744  
1.2643  
1.2456  
1.2380  
1.2290  
1.2180  
1.2009  
1.1939  
0.9829  
0.9562  
0.9481  
0.9356  
0.8761  
0.7673  
0.7483  
0.7405  
0.7309  
0.7207  
0.7028  
0.6958

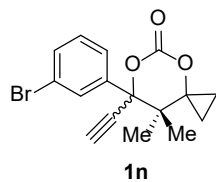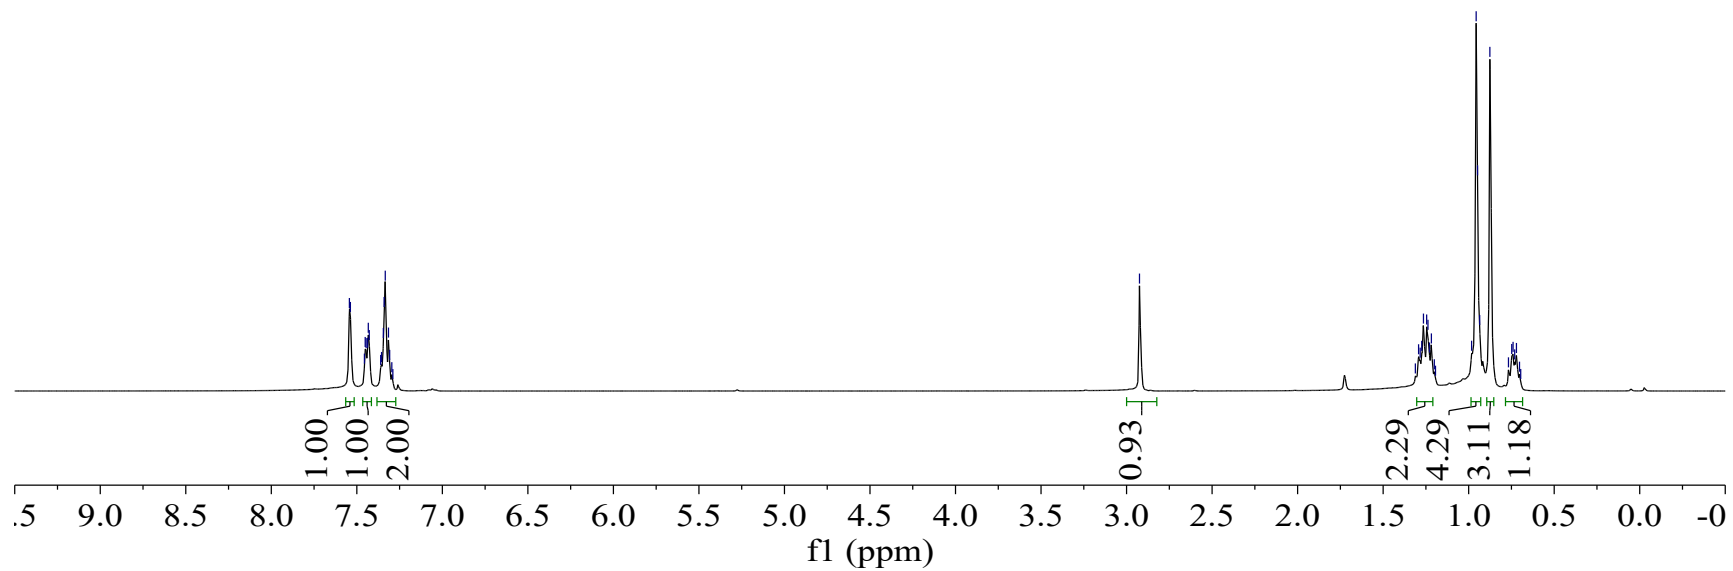

<sup>1</sup>H NMR spectrum of compound **1n**

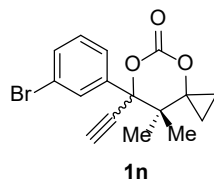

147.84  
 138.07  
 132.02  
 130.20  
 129.26  
 125.95  
 121.94

85.37  
 80.38  
 78.73  
 70.22

37.94

19.58  
 19.47  
 12.23  
 7.33

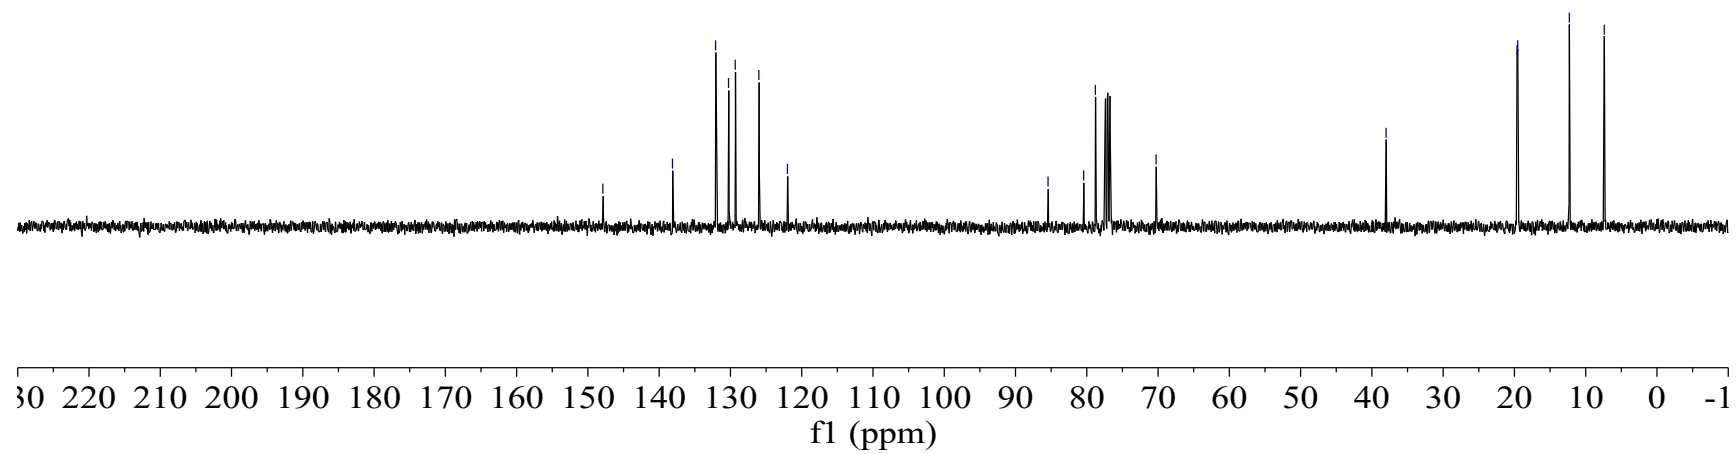

<sup>13</sup>C NMR spectrum of compound **1n**

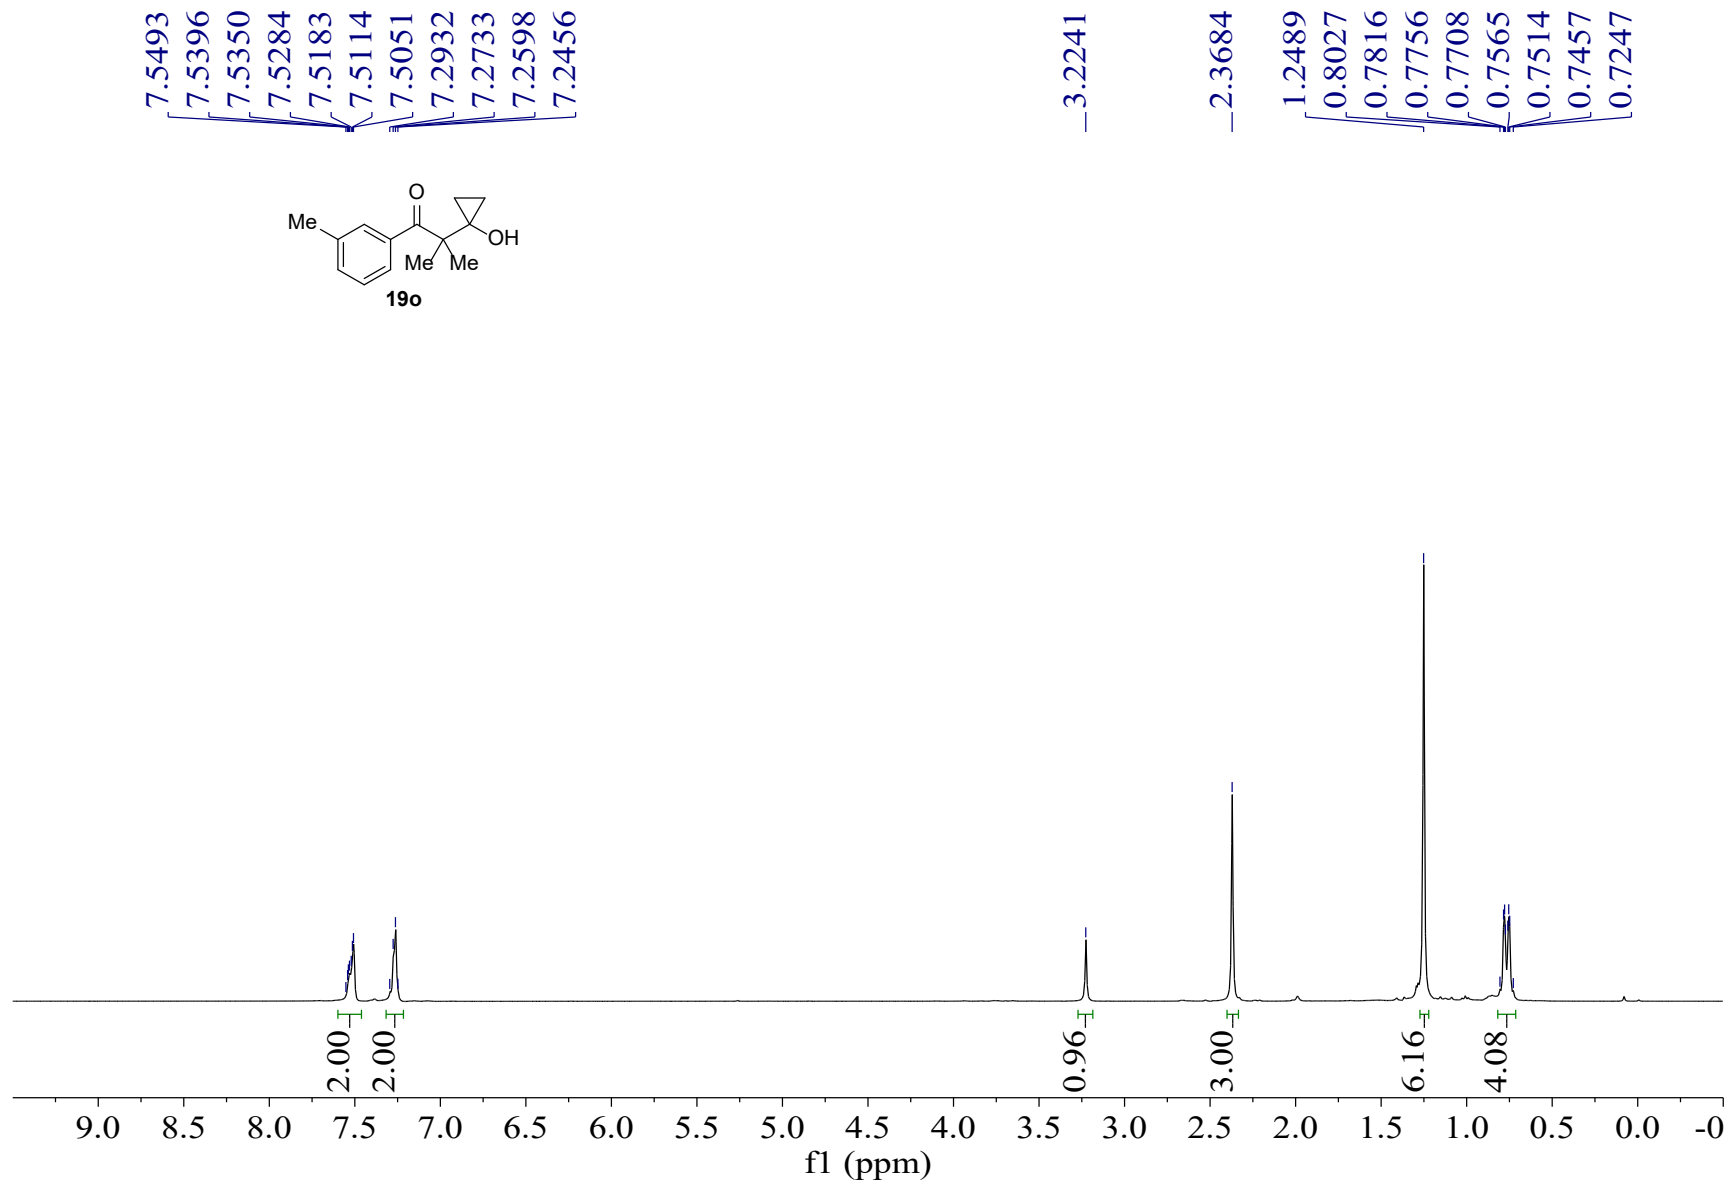

<sup>1</sup>H NMR spectrum of compound **19o**

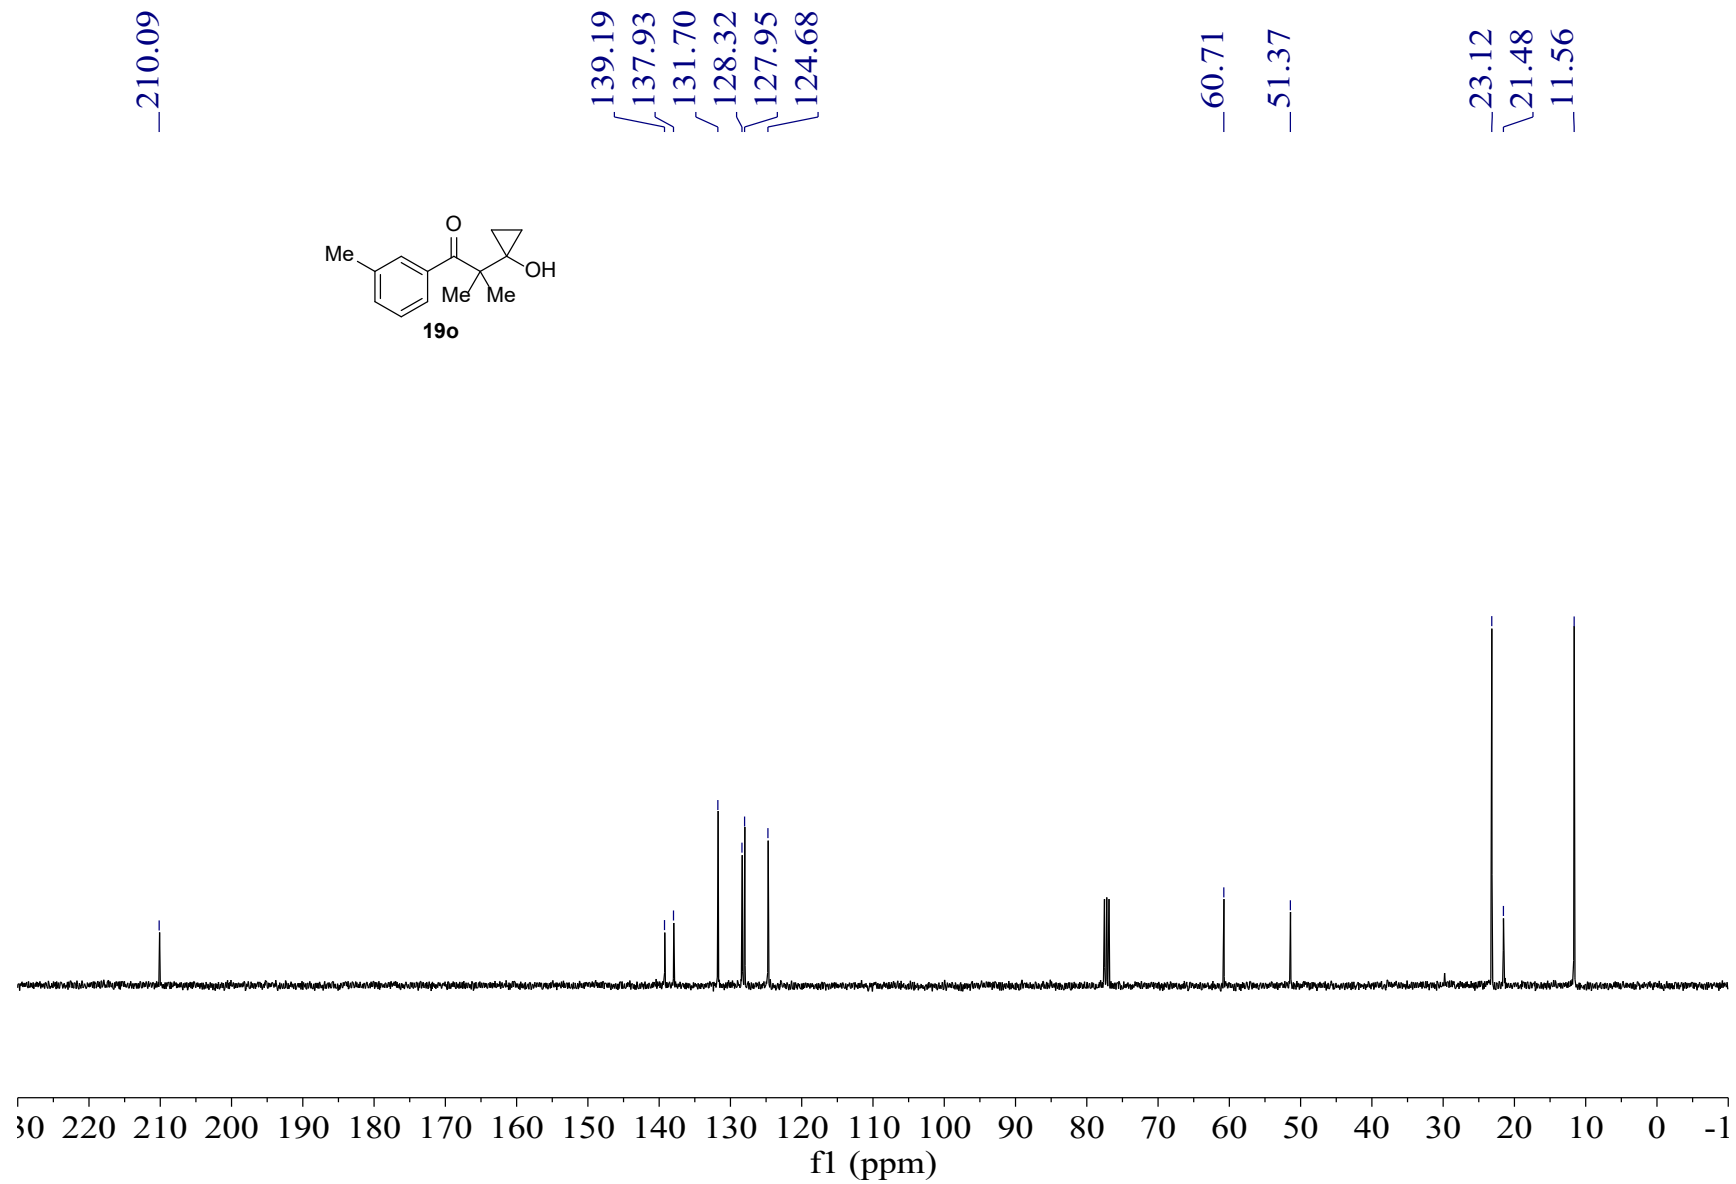

<sup>13</sup>C NMR spectrum of compound **19o**

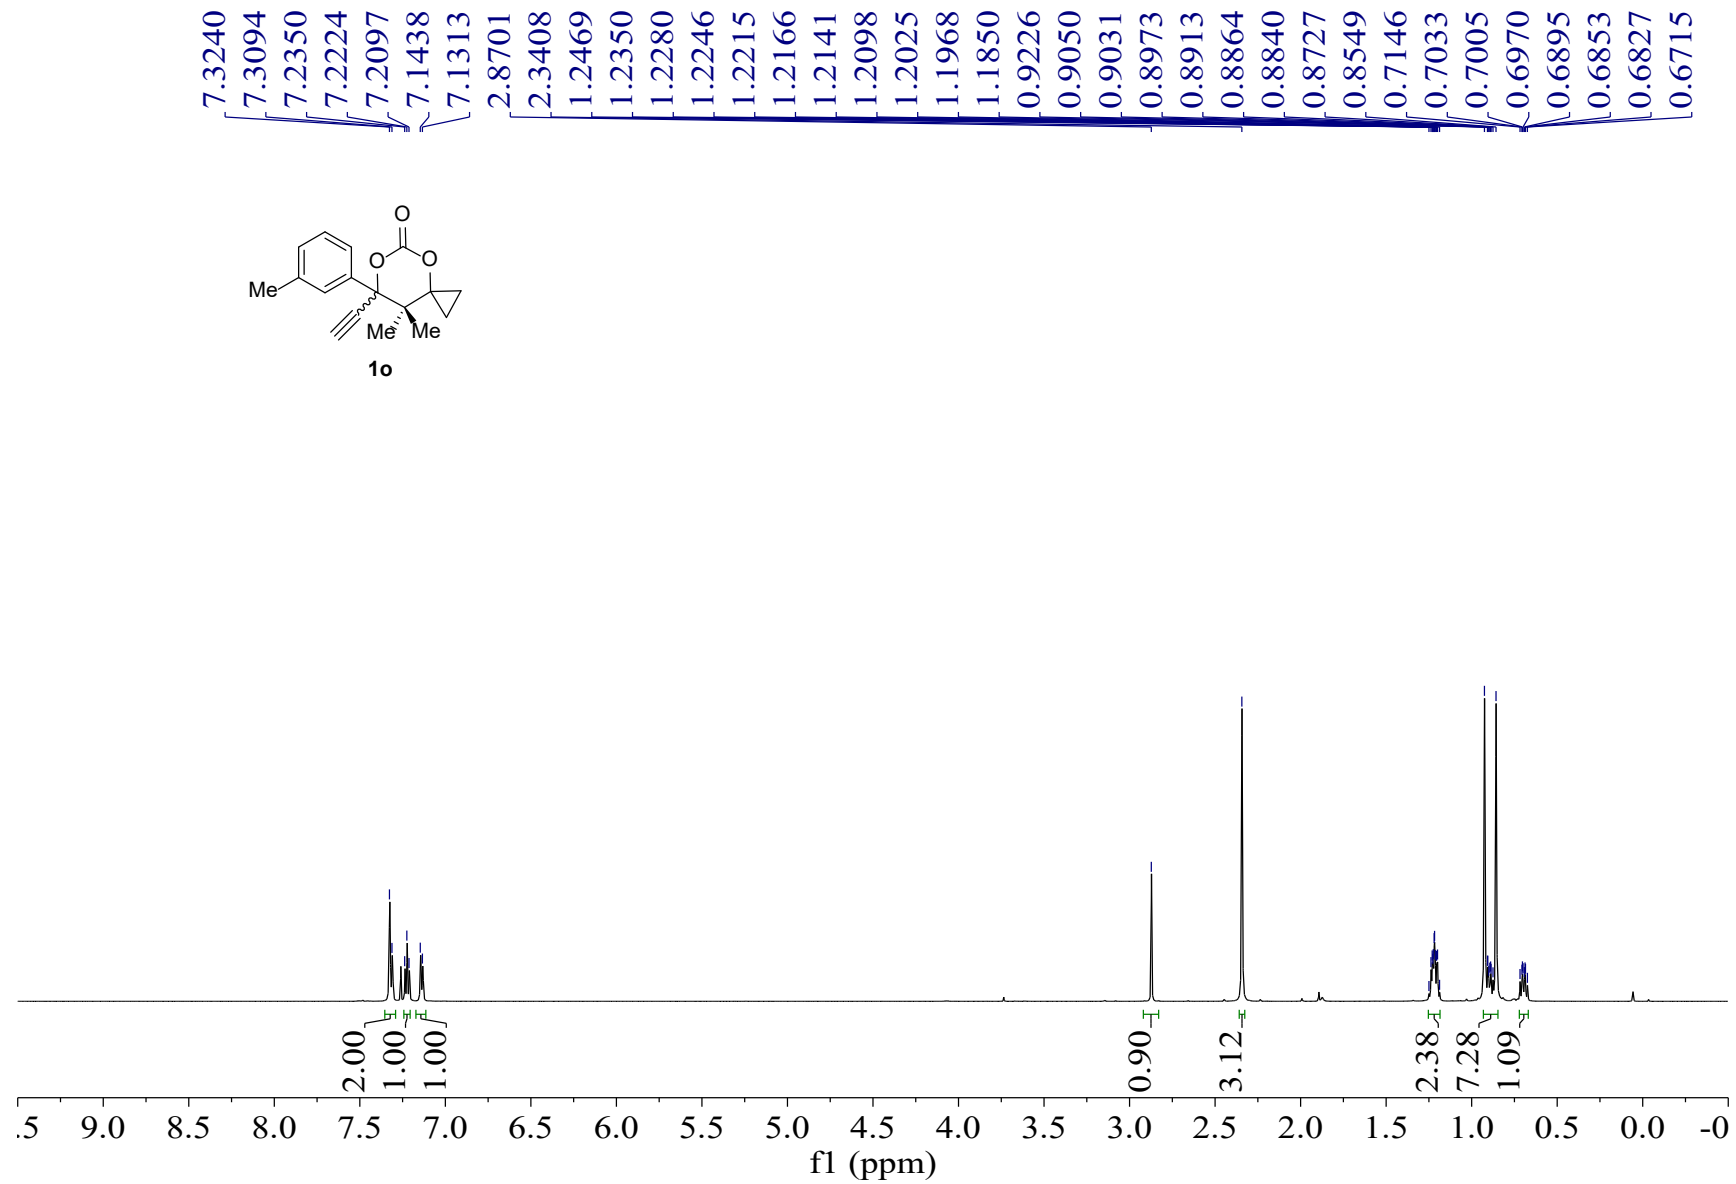

<sup>1</sup>H NMR spectrum of compound **1o**

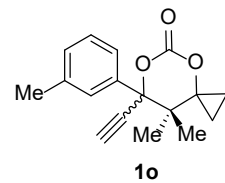

148.31  
 137.28  
 135.72  
 129.48  
 127.61  
 127.47  
 124.38

86.15  
 80.98  
 78.15  
 70.13

37.80  
 21.50  
 19.62  
 19.45  
 12.06  
 7.29

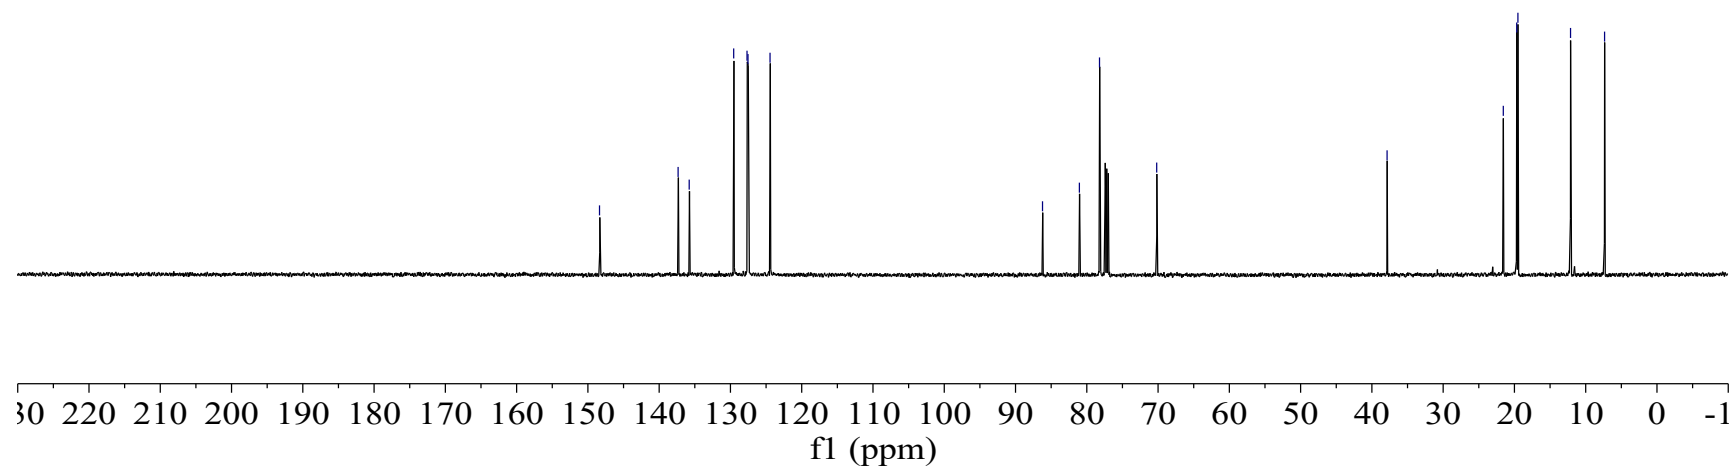

<sup>13</sup>C NMR spectrum of compound **1o**

7.4011  
7.3966  
7.3877  
7.3823  
7.3774  
7.3672  
7.3624  
7.3571  
7.3482  
7.3438  
7.3362  
7.3320  
7.3175  
7.3132  
7.3004  
7.2961  
7.1735  
7.1548  
7.1360  
7.1071  
7.0846  
7.0621

3.0691

1.1700  
0.7422  
0.7220  
0.7173  
0.7105  
0.6845  
0.6740  
0.6536  
0.6501

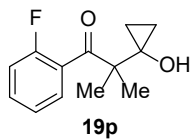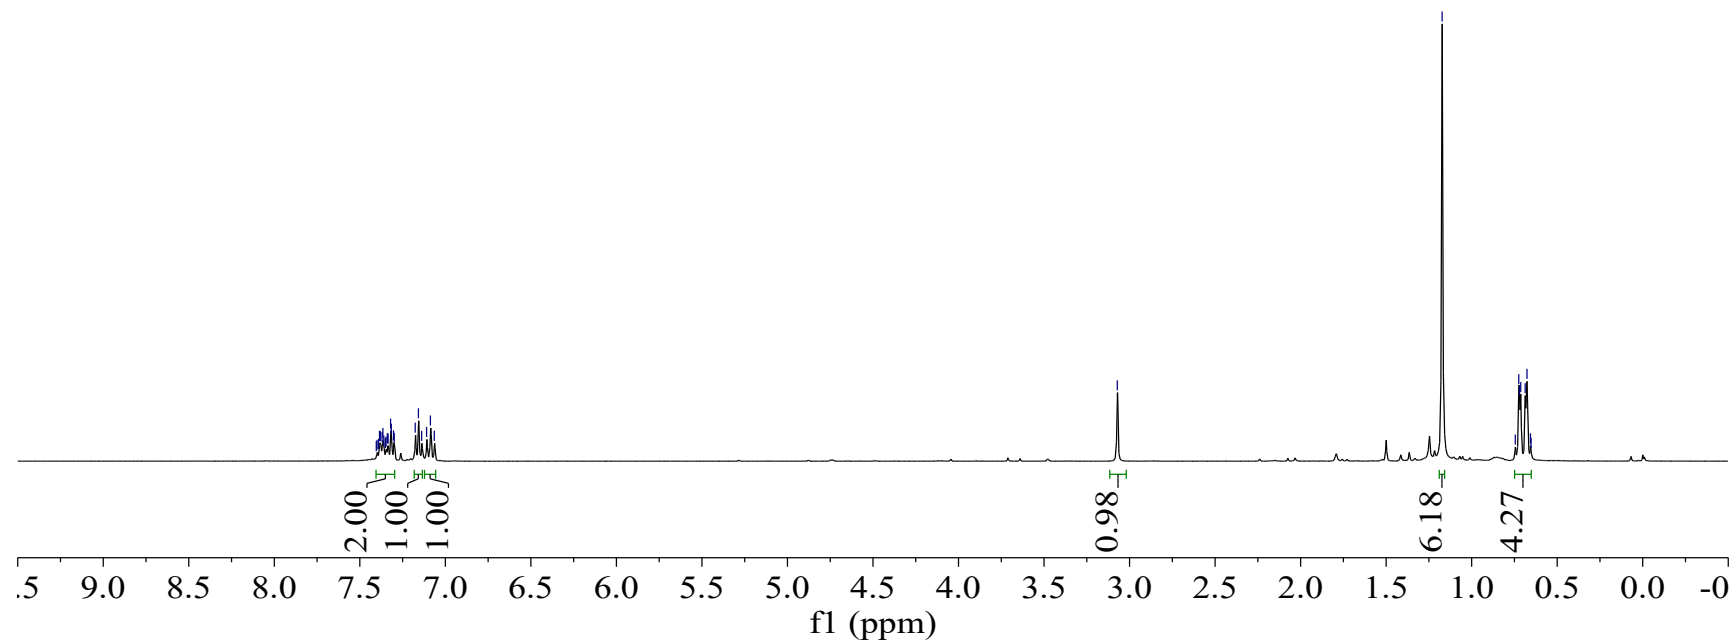

<sup>1</sup>H NMR spectrum of compound **19p**



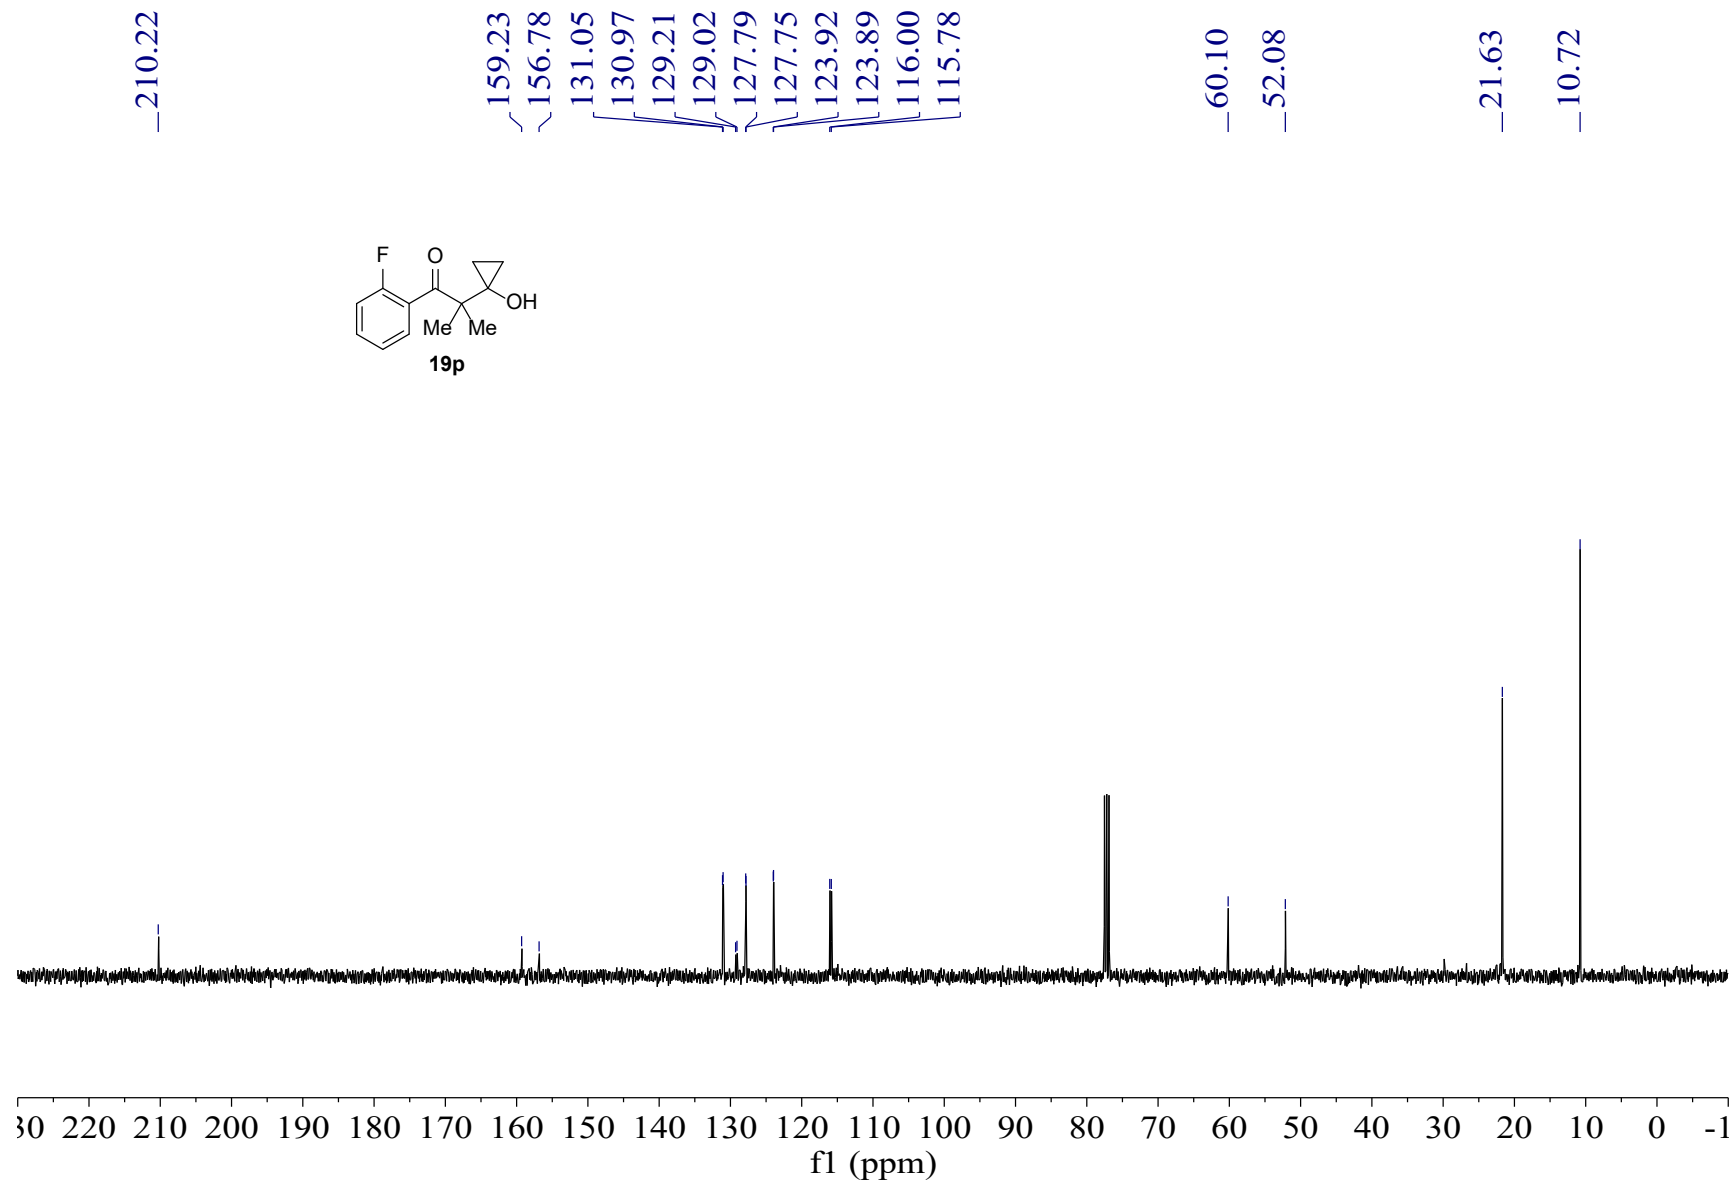

<sup>13</sup>C NMR spectrum of compound **19p**

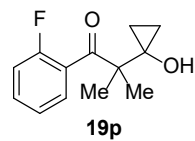

--113.71

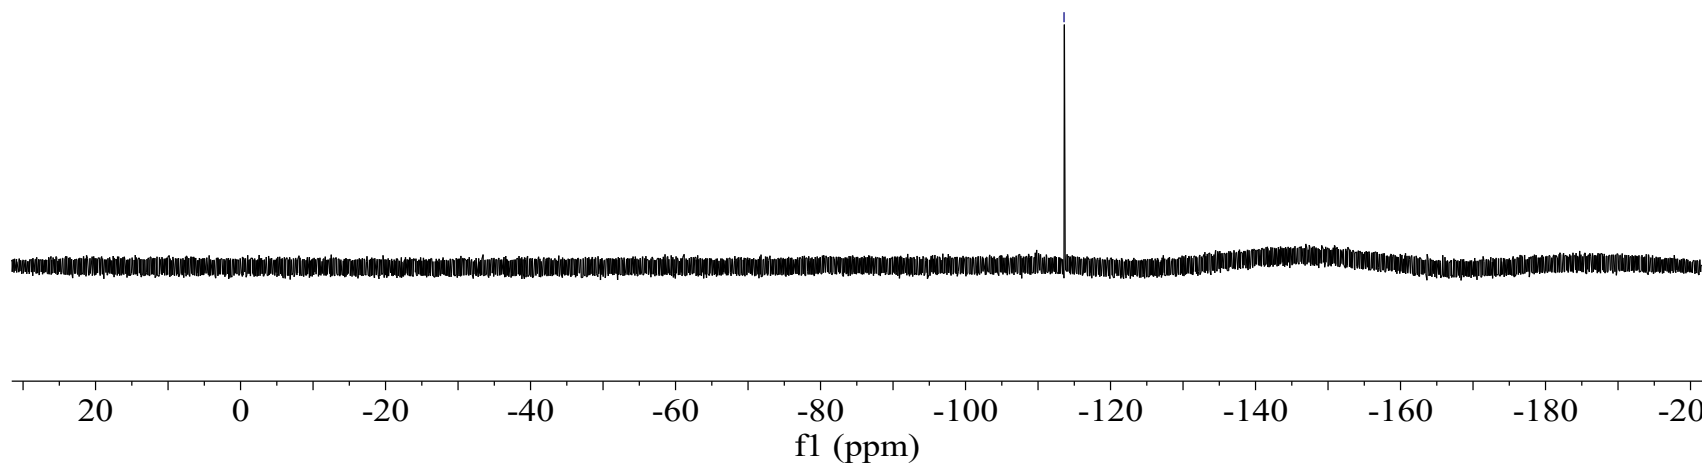

$^{19}\text{F}$  NMR spectrum of compound **19p**

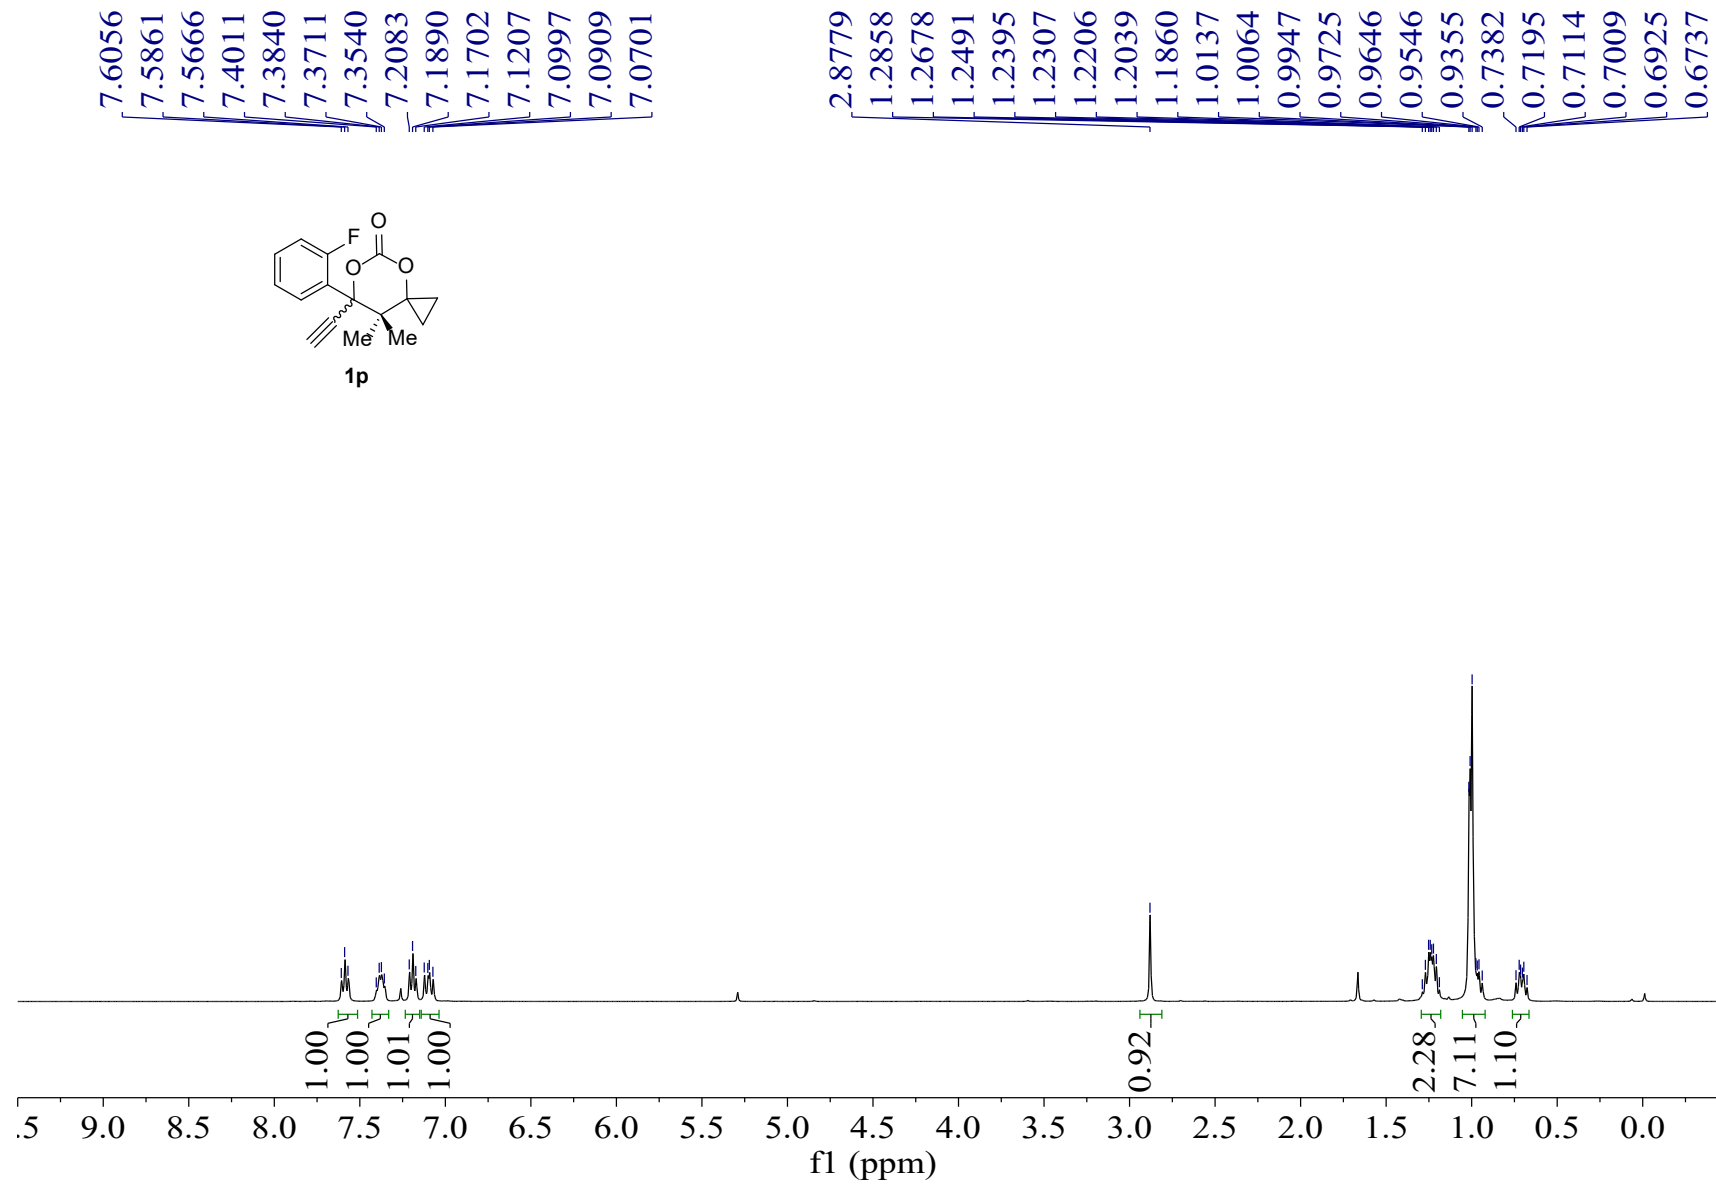

<sup>1</sup>H NMR spectrum of compound **1p**

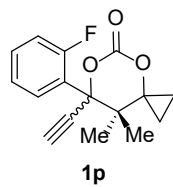

160.52  
 158.02  
 147.88  
 131.05  
 130.96  
 129.75  
 129.73  
 123.70  
 123.67  
 123.25  
 123.16  
 117.01  
 116.77  
 79.56  
 77.91  
 77.88  
 69.51  
 38.88  
 20.00  
 19.96  
 19.67  
 11.61  
 7.42

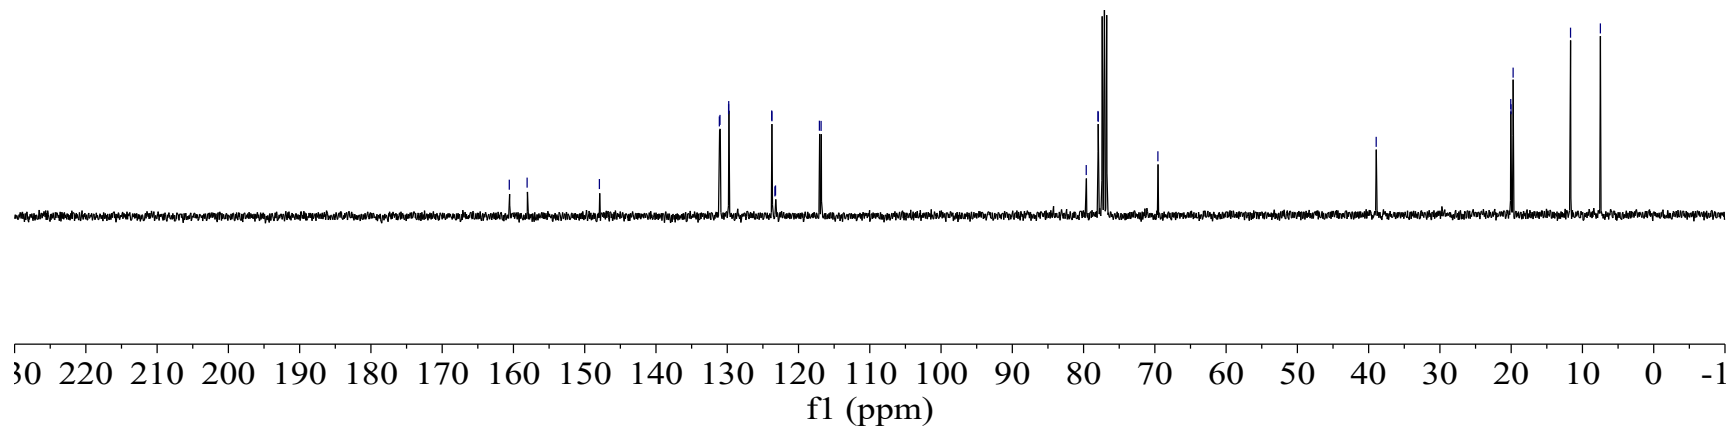

<sup>13</sup>C NMR spectrum of compound **1p**

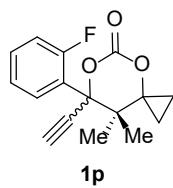

-105.77

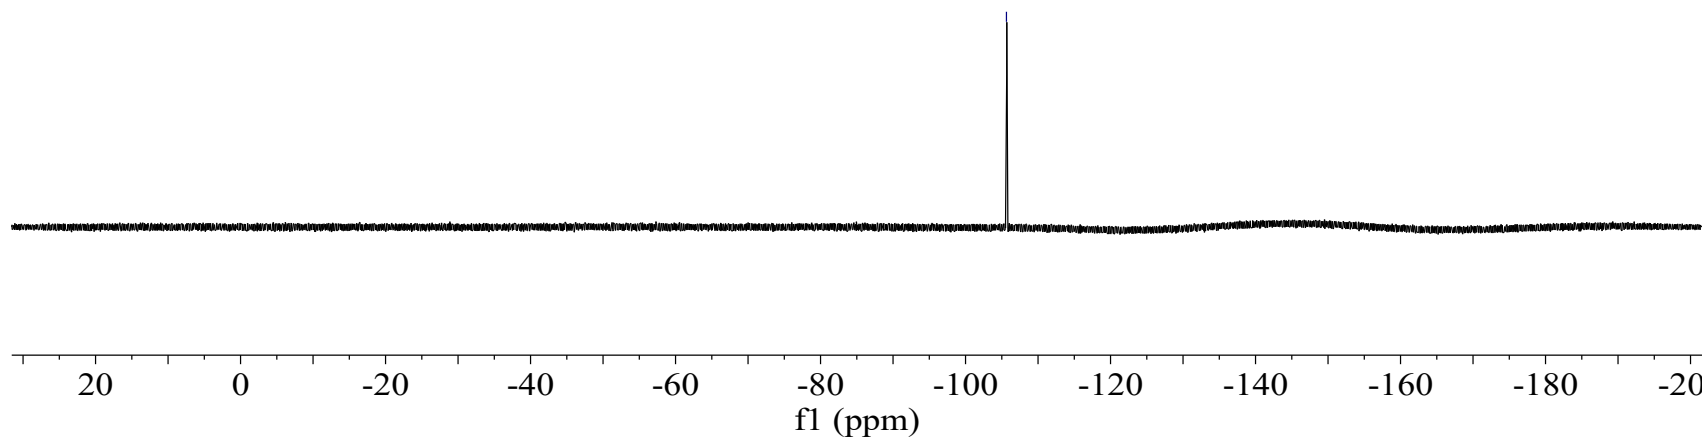

$^{19}\text{F}$  NMR spectrum of compound **1p**

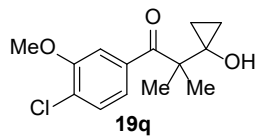

7.3353

3.8705

3.1923

1.1845  
0.8001  
0.7774  
0.7712  
0.7624  
0.7592  
0.7534  
0.7309

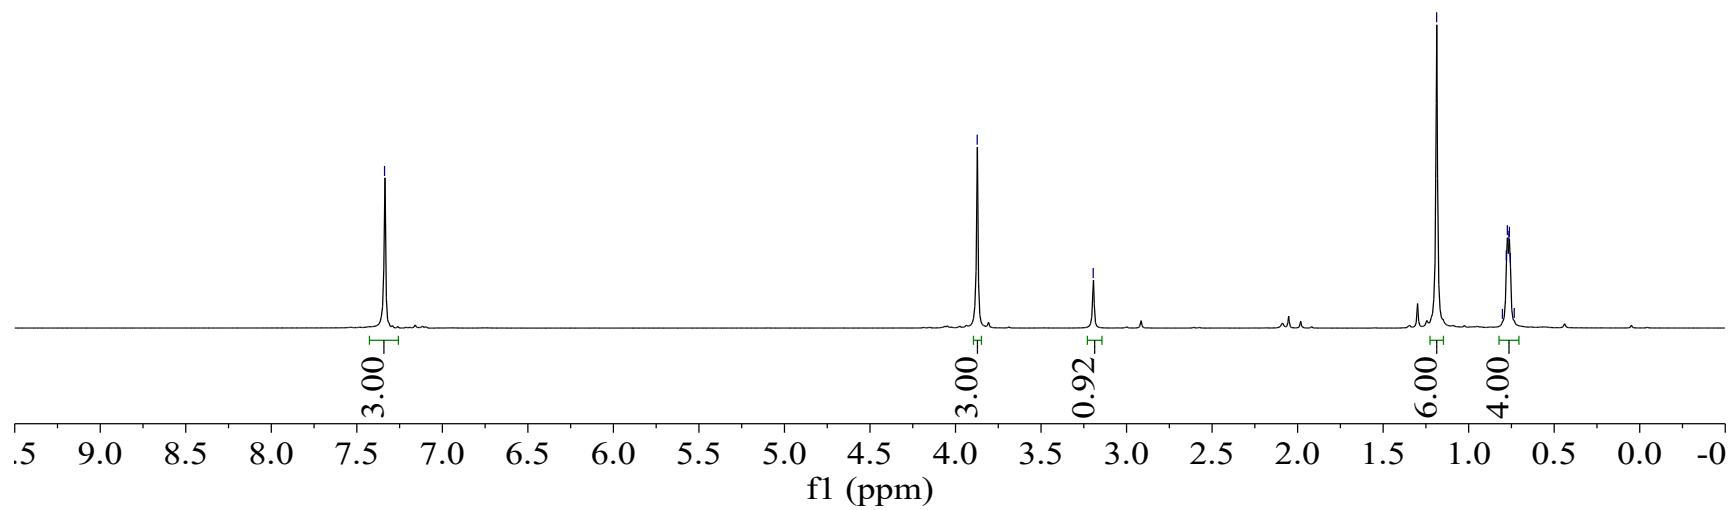

<sup>1</sup>H NMR spectrum of compound **19q**

207.54

154.75

138.28

129.63

125.68

120.84

111.85

60.73

56.17

51.50

23.10

12.08

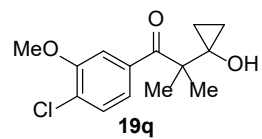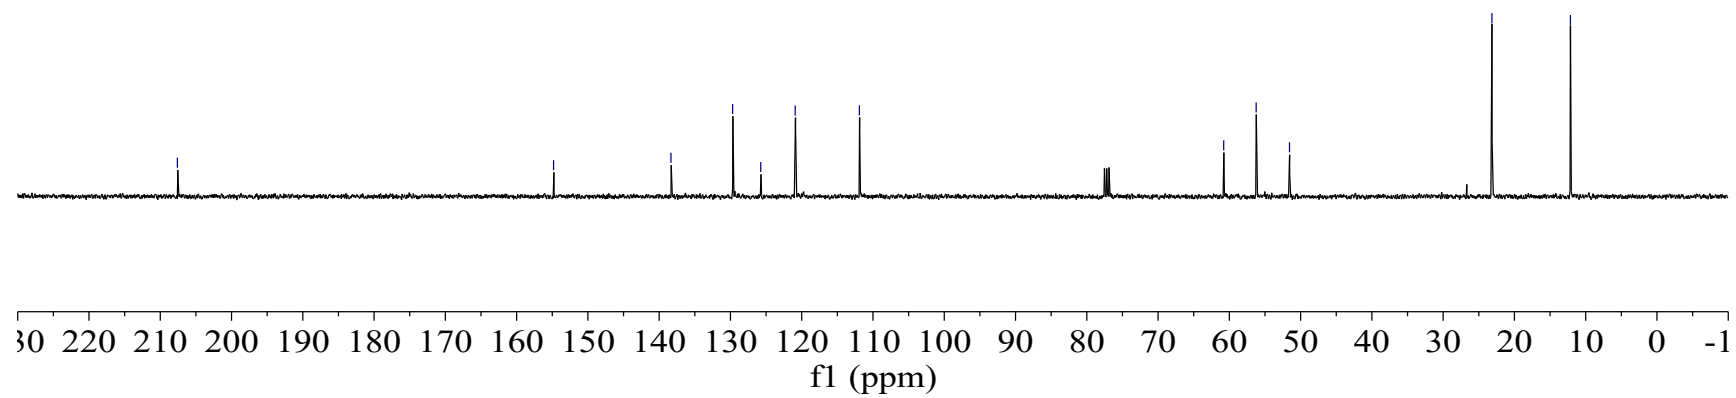

<sup>13</sup>C NMR spectrum of compound **19q**

7.3343  
7.3121  
7.0734  
7.0680  
7.0564  
7.0510

3.8715  
2.9246  
1.2794  
1.2610  
1.2508  
1.2410  
1.2326  
1.2208  
1.2128  
1.2027  
1.1941  
1.1760  
0.9392  
0.9196  
0.9118  
0.9019  
0.8833  
0.8488  
0.7495  
0.7325  
0.7289  
0.7226  
0.7121  
0.7052  
0.7018  
0.6849

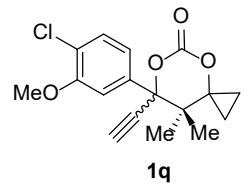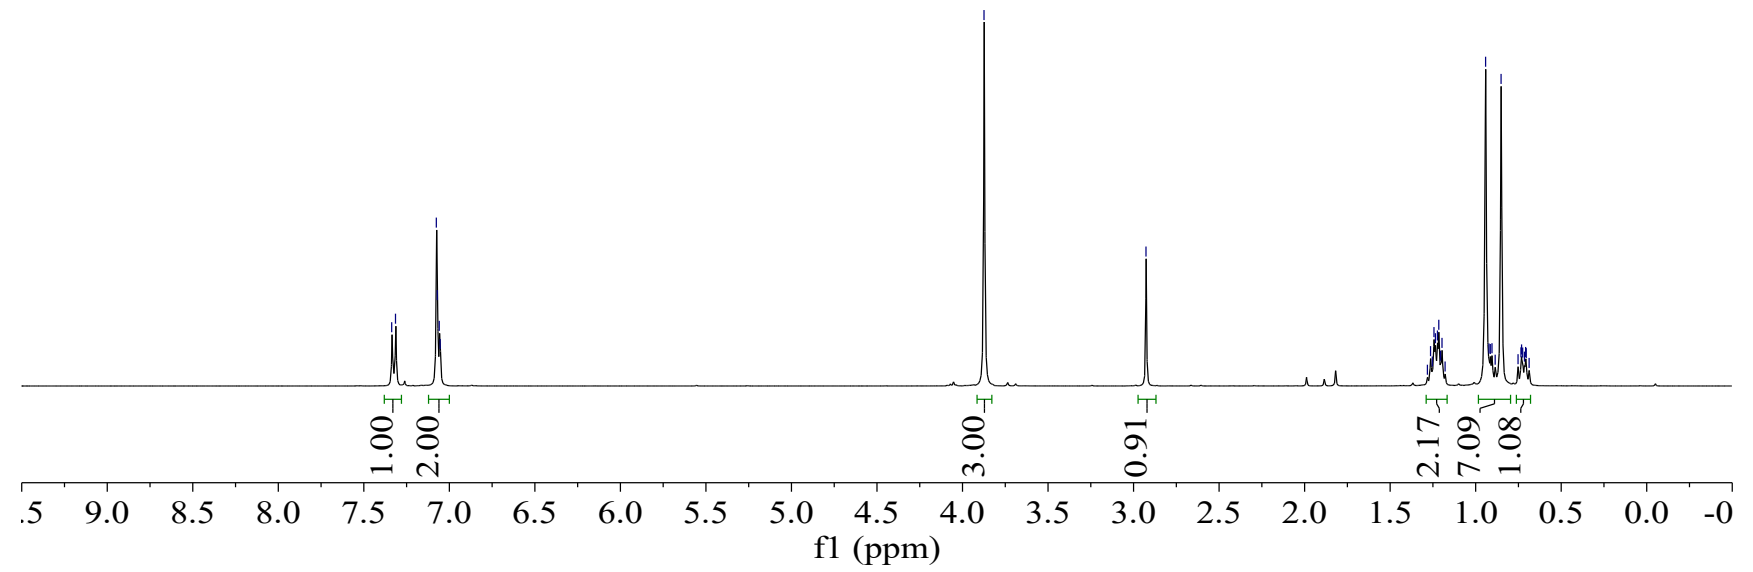

<sup>1</sup>H NMR spectrum of compound **1q**



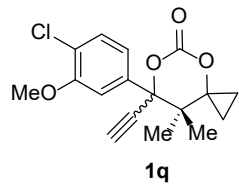

154.30  
 147.93  
 135.87  
 129.28  
 123.26  
 120.42  
 111.14  
 85.64  
 80.54  
 78.64  
 70.28  
 56.33  
 37.98  
 19.60  
 19.53  
 12.28  
 7.32

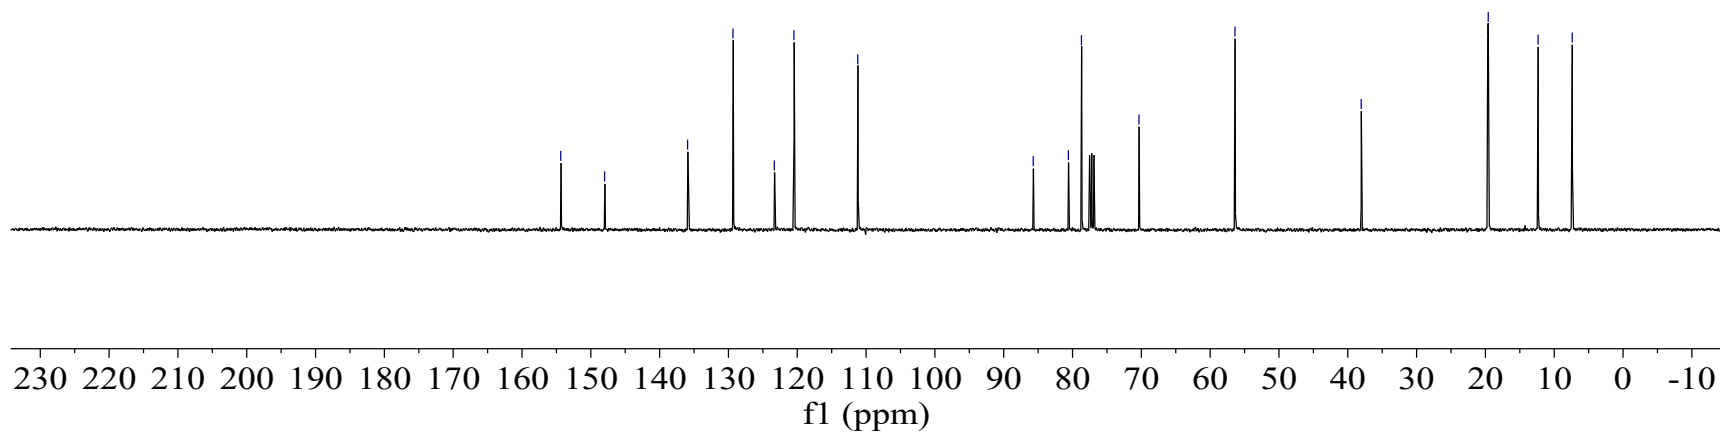

<sup>13</sup>C NMR spectrum of compound **1q**

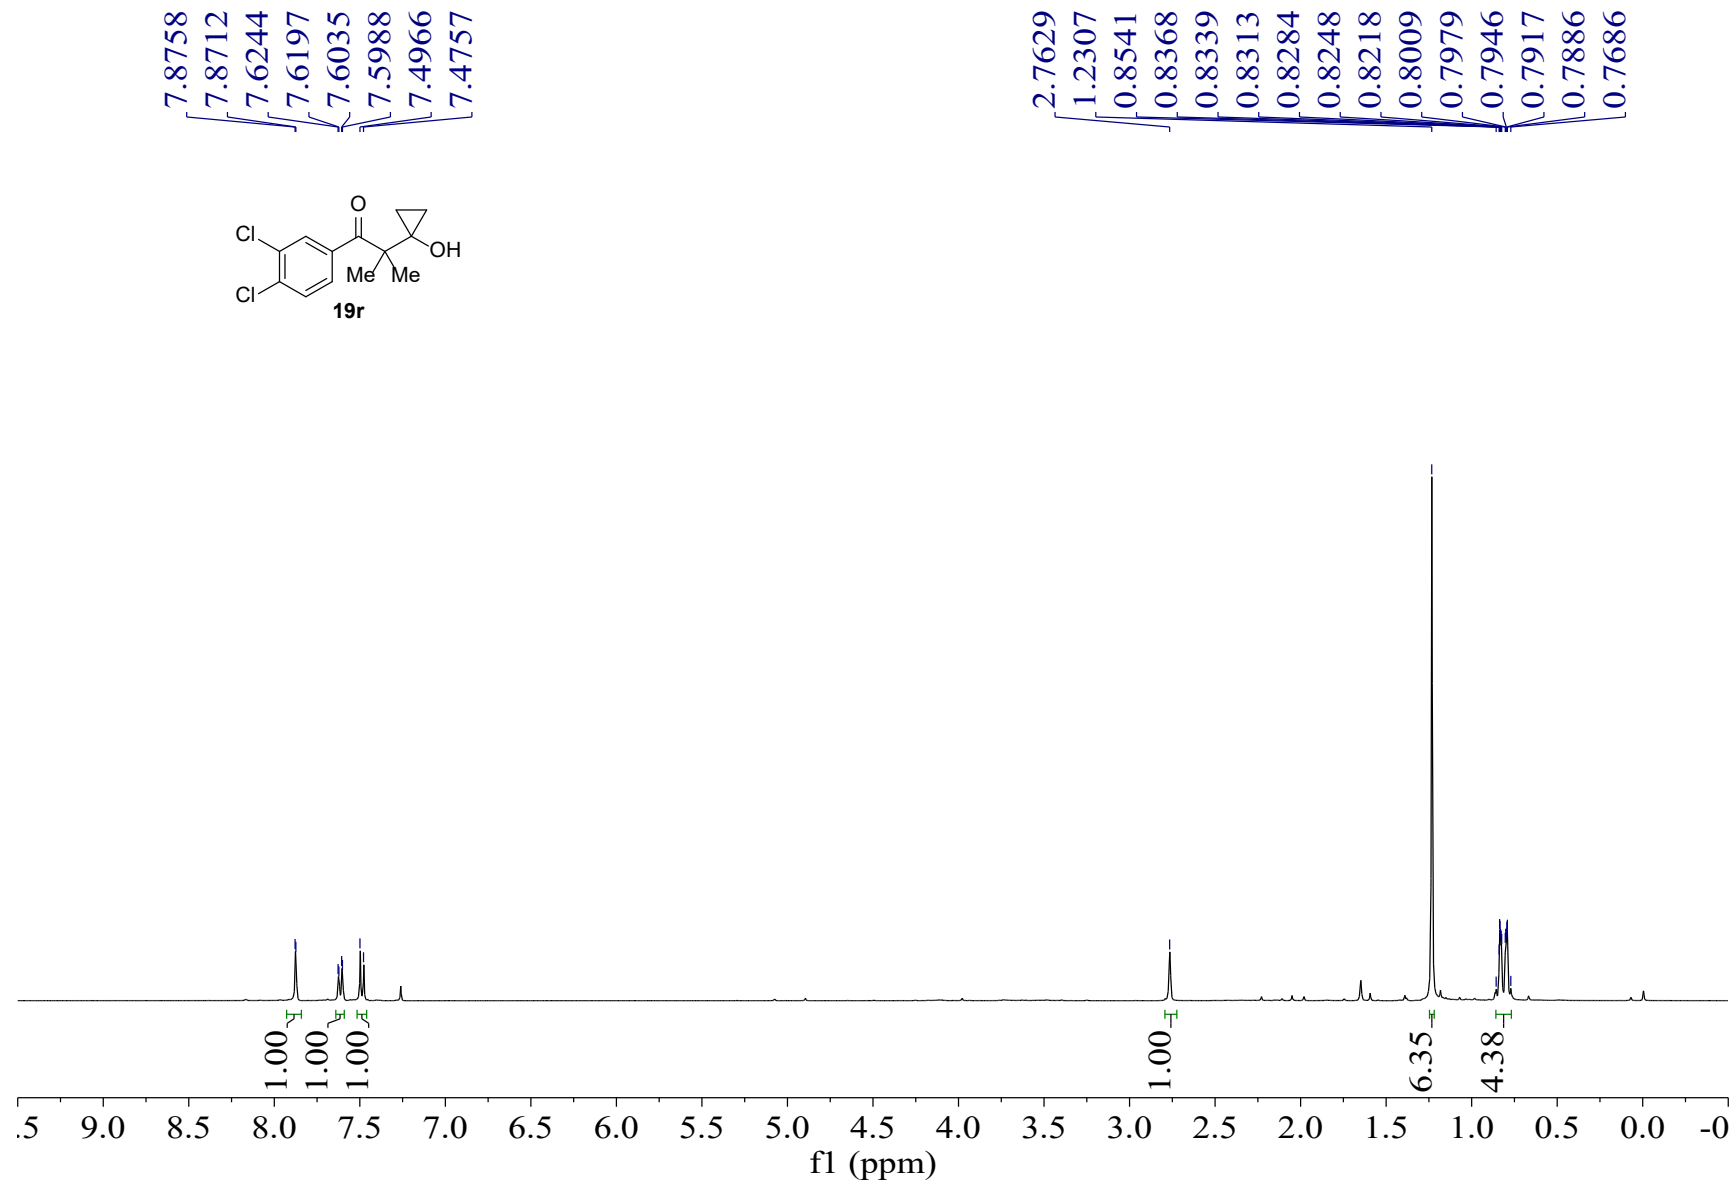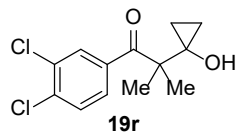

<sup>1</sup>H NMR spectrum of compound **19r**

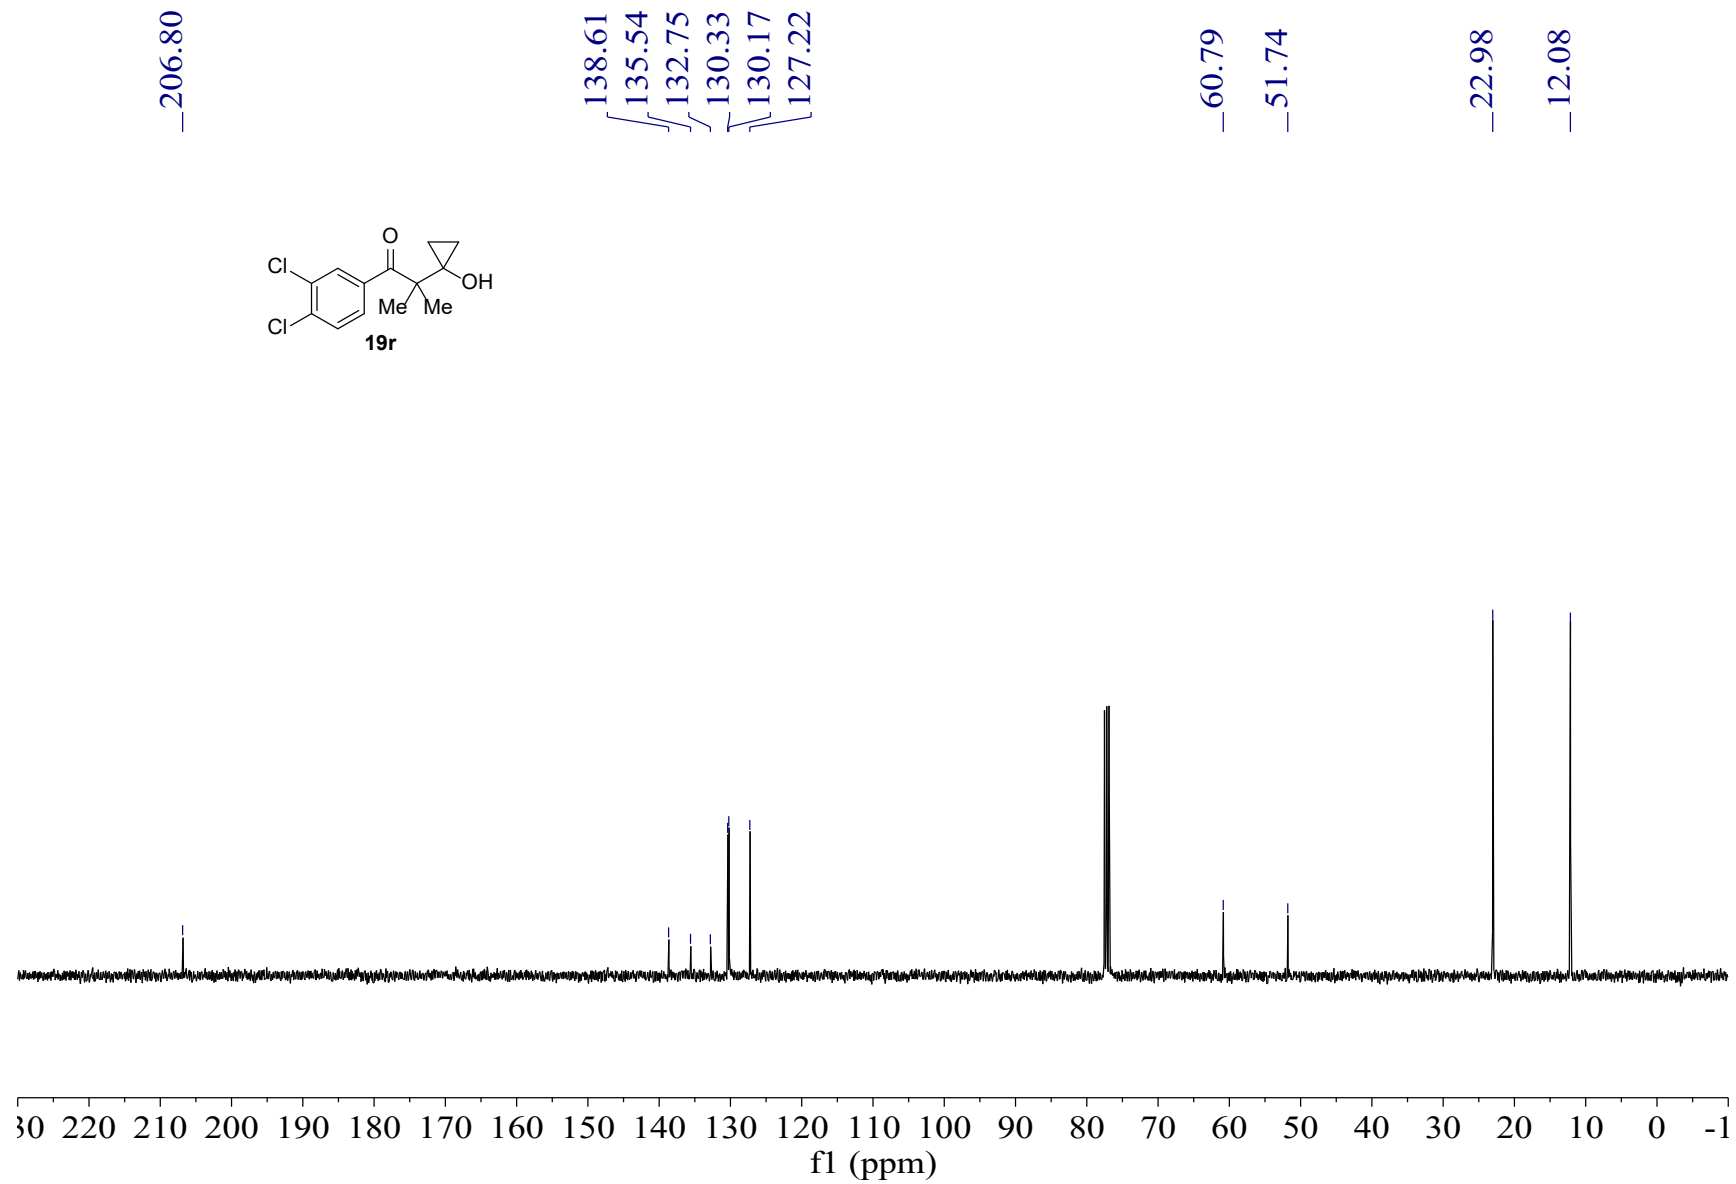

<sup>13</sup>C NMR spectrum of compound **19r**

7.6562  
7.4819  
7.4610  
7.4162  
7.3949

2.9438  
1.3355  
1.3169  
1.3064  
1.2977  
1.2878  
1.2723  
1.2682  
1.2550  
1.2448  
1.2369  
1.2270  
1.2090  
1.0099  
0.9921  
0.9736  
0.9442  
0.8806  
0.7873  
0.7686  
0.7596  
0.7499  
0.7410  
0.7218

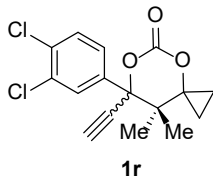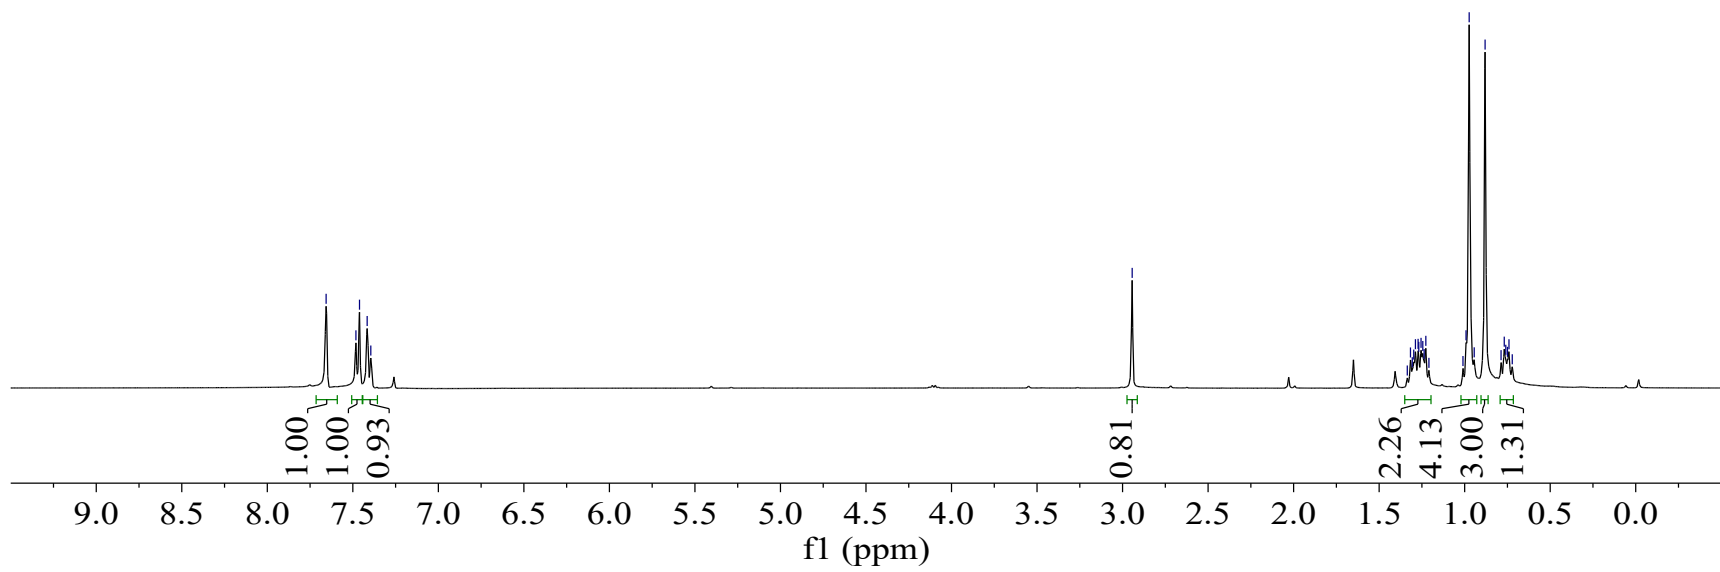

<sup>1</sup>H NMR spectrum of compound **1r**

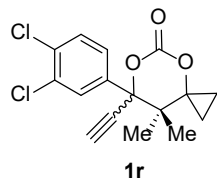

147.73  
136.24  
133.50  
132.38  
129.84  
129.38  
126.73

85.16  
80.20  
79.09  
70.36

38.09

19.64  
19.56  
12.41  
7.44

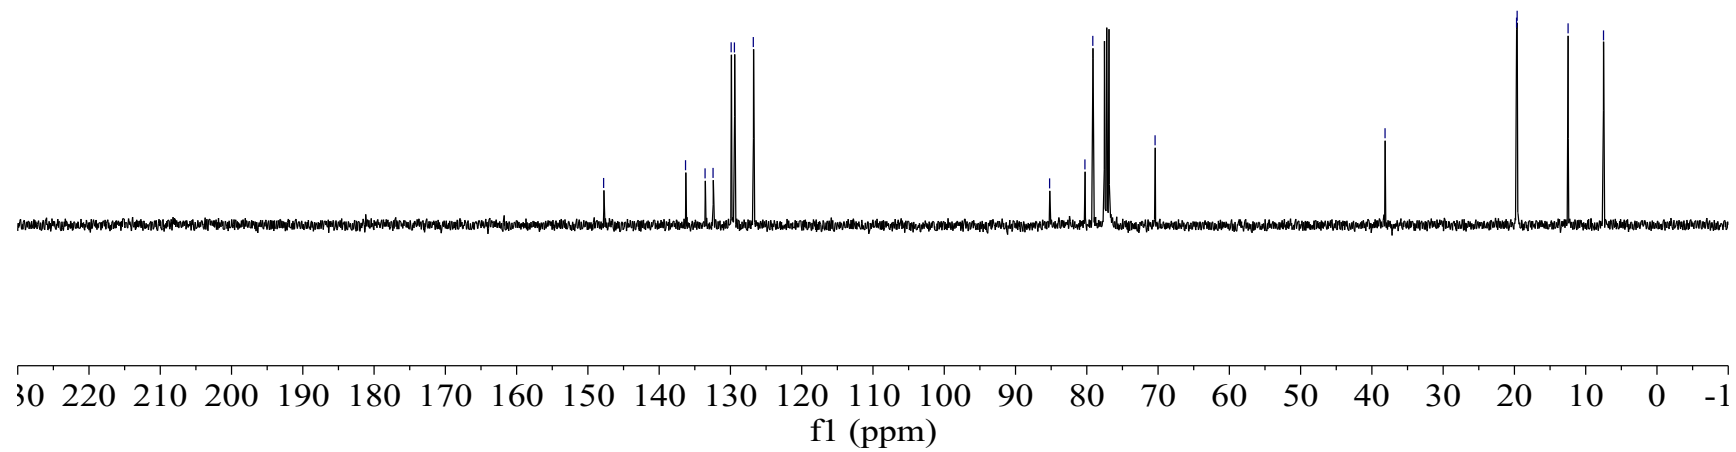

<sup>13</sup>C NMR spectrum of compound **1r**

7.5824  
7.5318  
7.5111  
7.4368  
7.4331  
7.4163  
7.4126

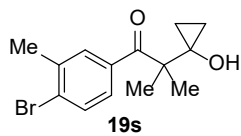

3.1961

2.3932

1.1972  
0.7939  
0.7724  
0.7664  
0.7619  
0.7492  
0.7444  
0.7385  
0.7171

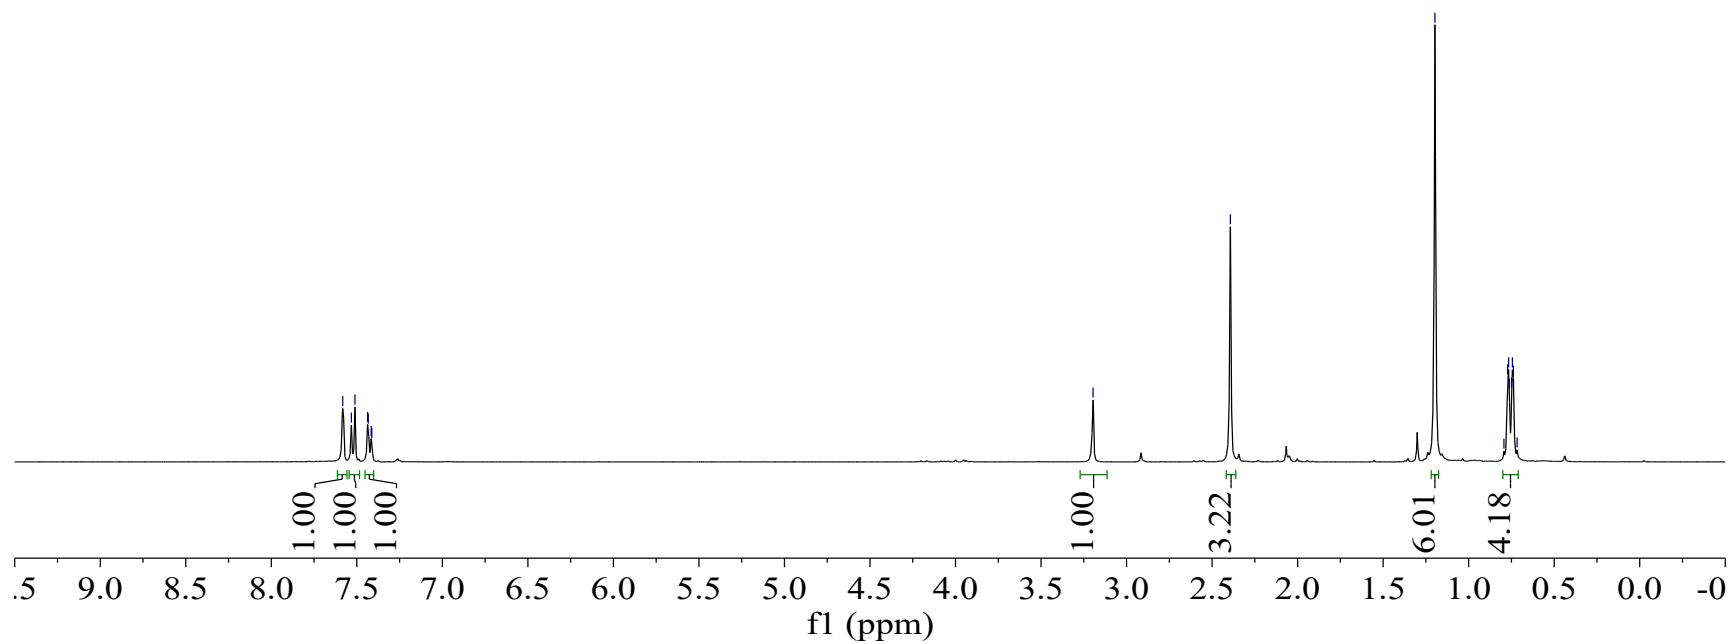

<sup>1</sup>H NMR spectrum of compound **19s**

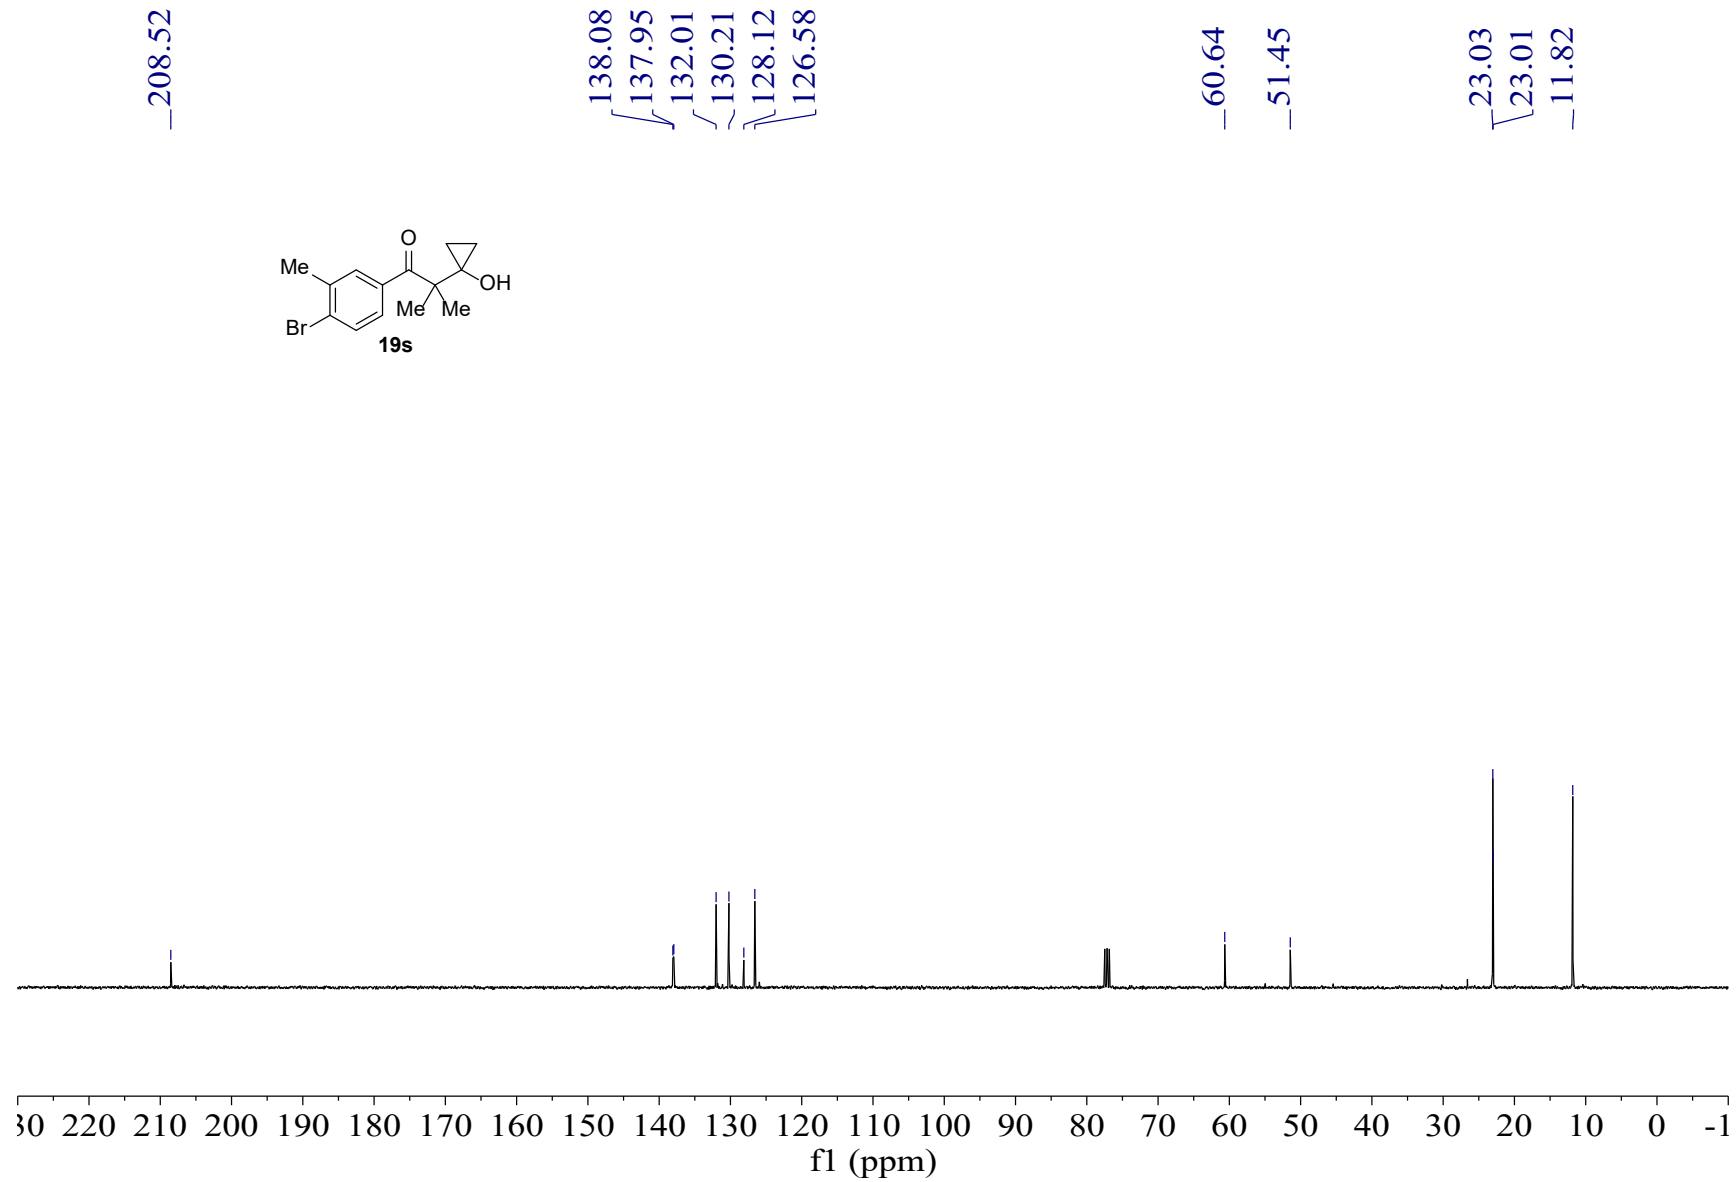

<sup>13</sup>C NMR spectrum of compound **19s**

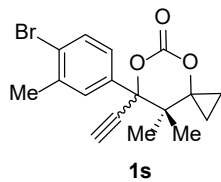

7.5043  
7.4833  
7.3812  
7.2177  
7.1924

2.9050  
2.3902  
1.2761  
1.2577  
1.2475  
1.2381  
1.2291  
1.2186  
1.2101  
1.1994  
1.1917  
1.1739  
0.9455  
0.9253  
0.9085  
0.8987  
0.8799  
0.8413  
0.7418  
0.7247  
0.7211  
0.7149  
0.7043  
0.6972  
0.6937  
0.6773

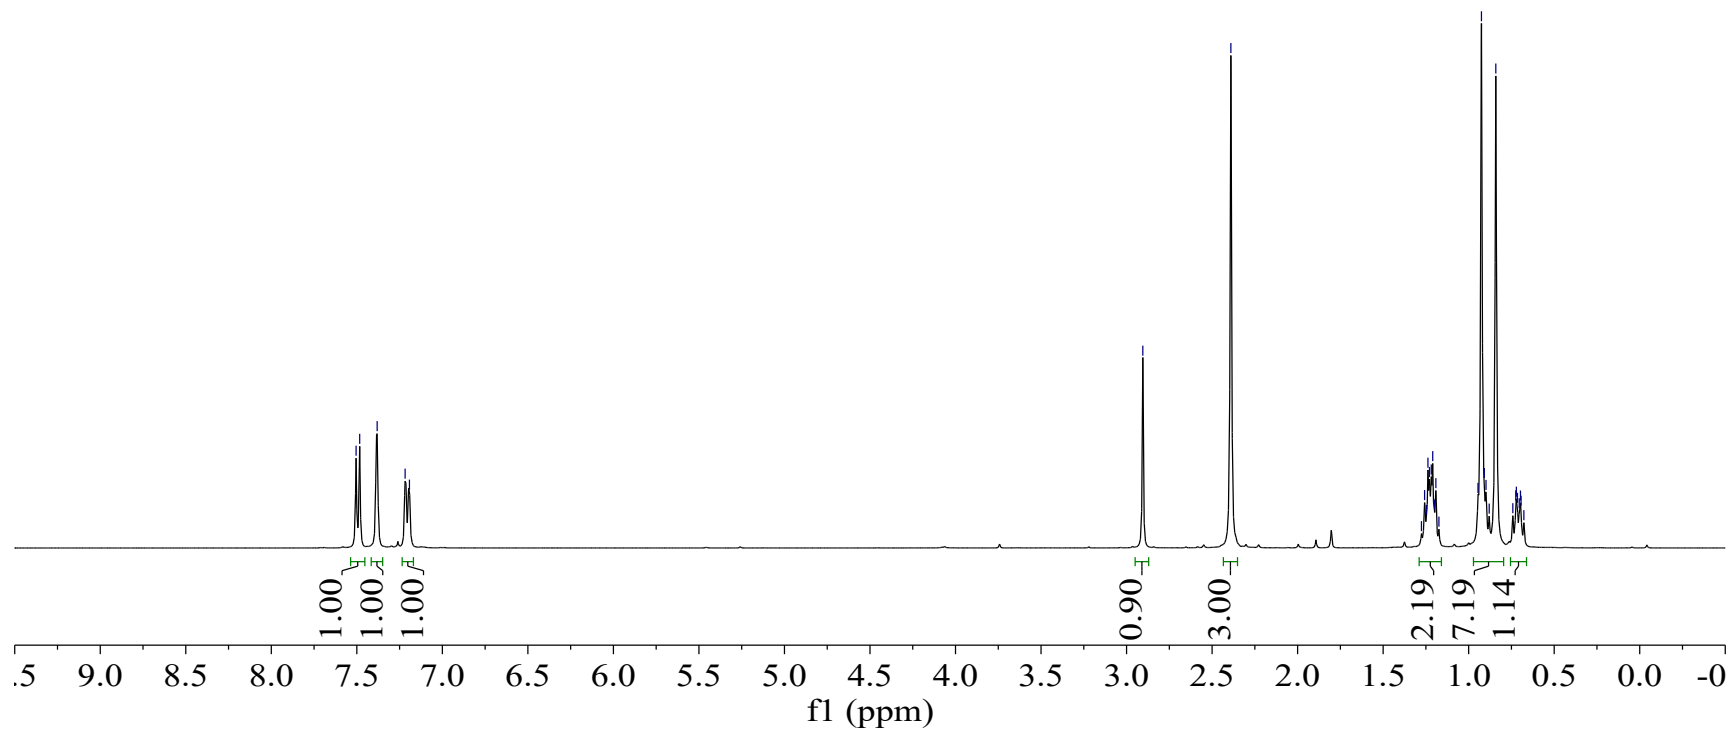

<sup>1</sup>H NMR spectrum of compound **1s**



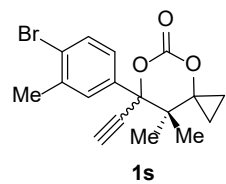

148.02  
 137.37  
 135.17  
 131.60  
 129.38  
 126.30  
 125.62

85.66  
 80.57  
 78.56  
 70.21

37.83  
 23.10  
 19.57  
 19.45  
 12.21  
 7.32

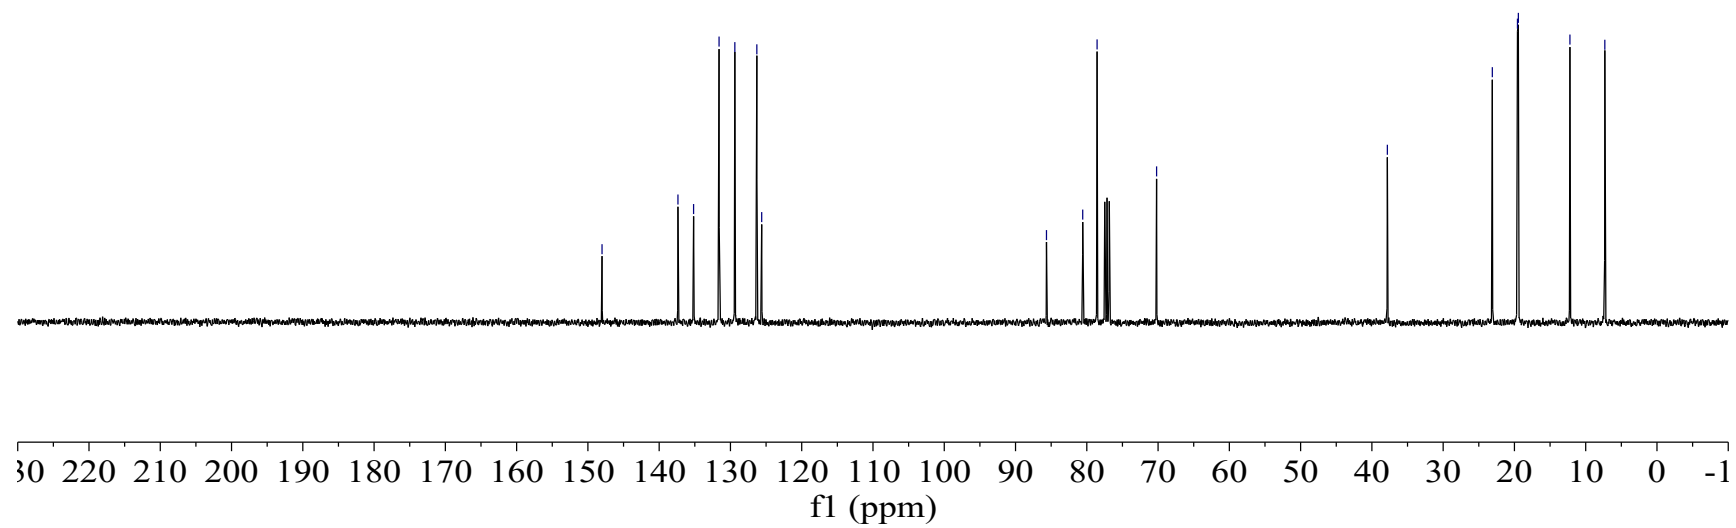

<sup>13</sup>C NMR spectrum of compound **1s**

7.5089  
7.4952  
7.3686  
6.8160  
6.8023

6.0010

3.0904

1.2731  
0.8284  
0.8136  
0.8068  
0.7872  
0.7808  
0.7670

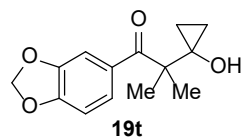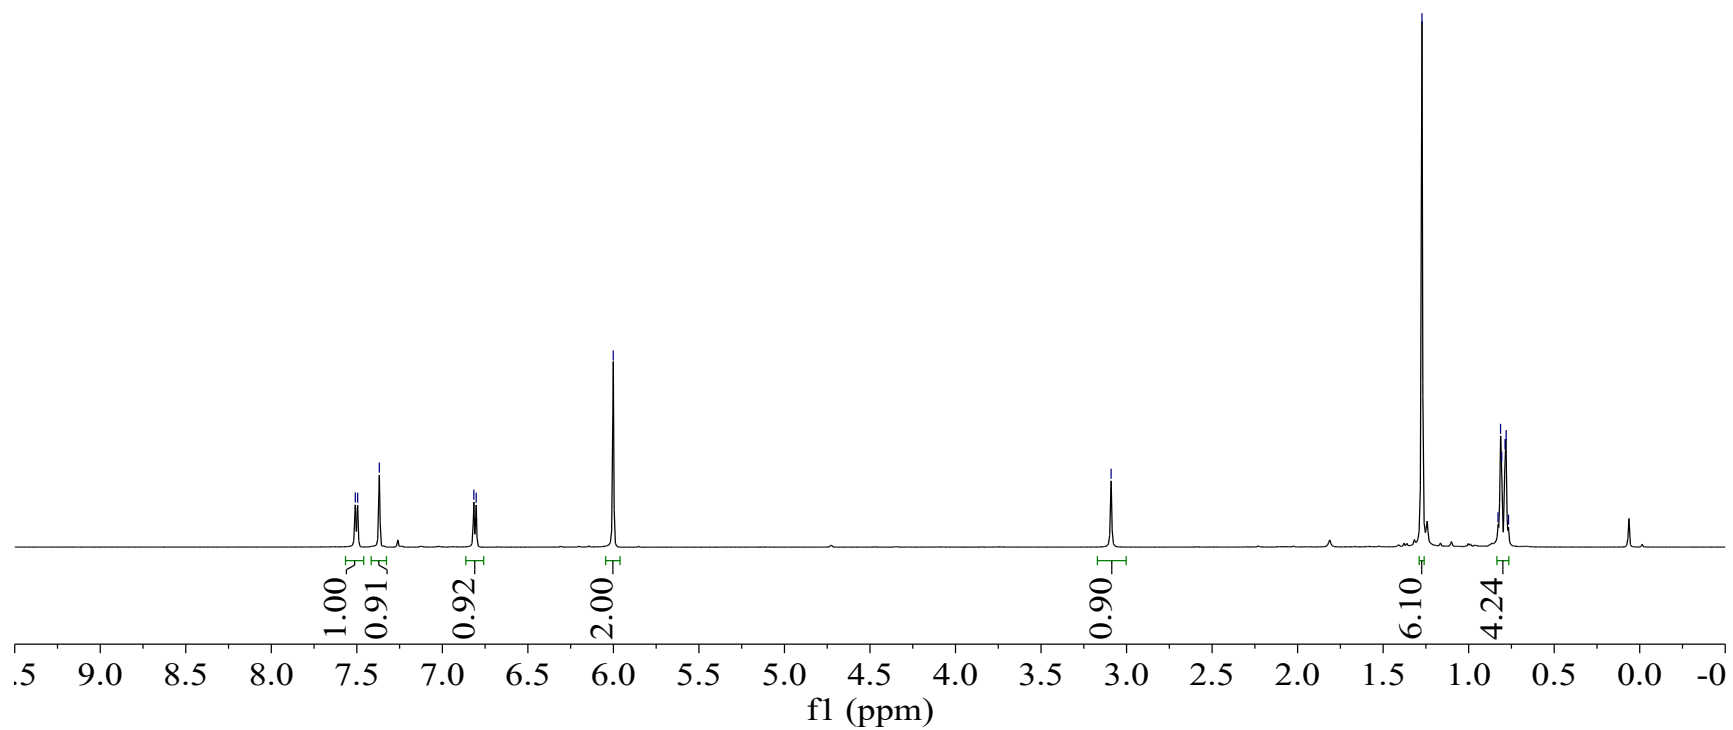

<sup>1</sup>H NMR spectrum of compound **19t**

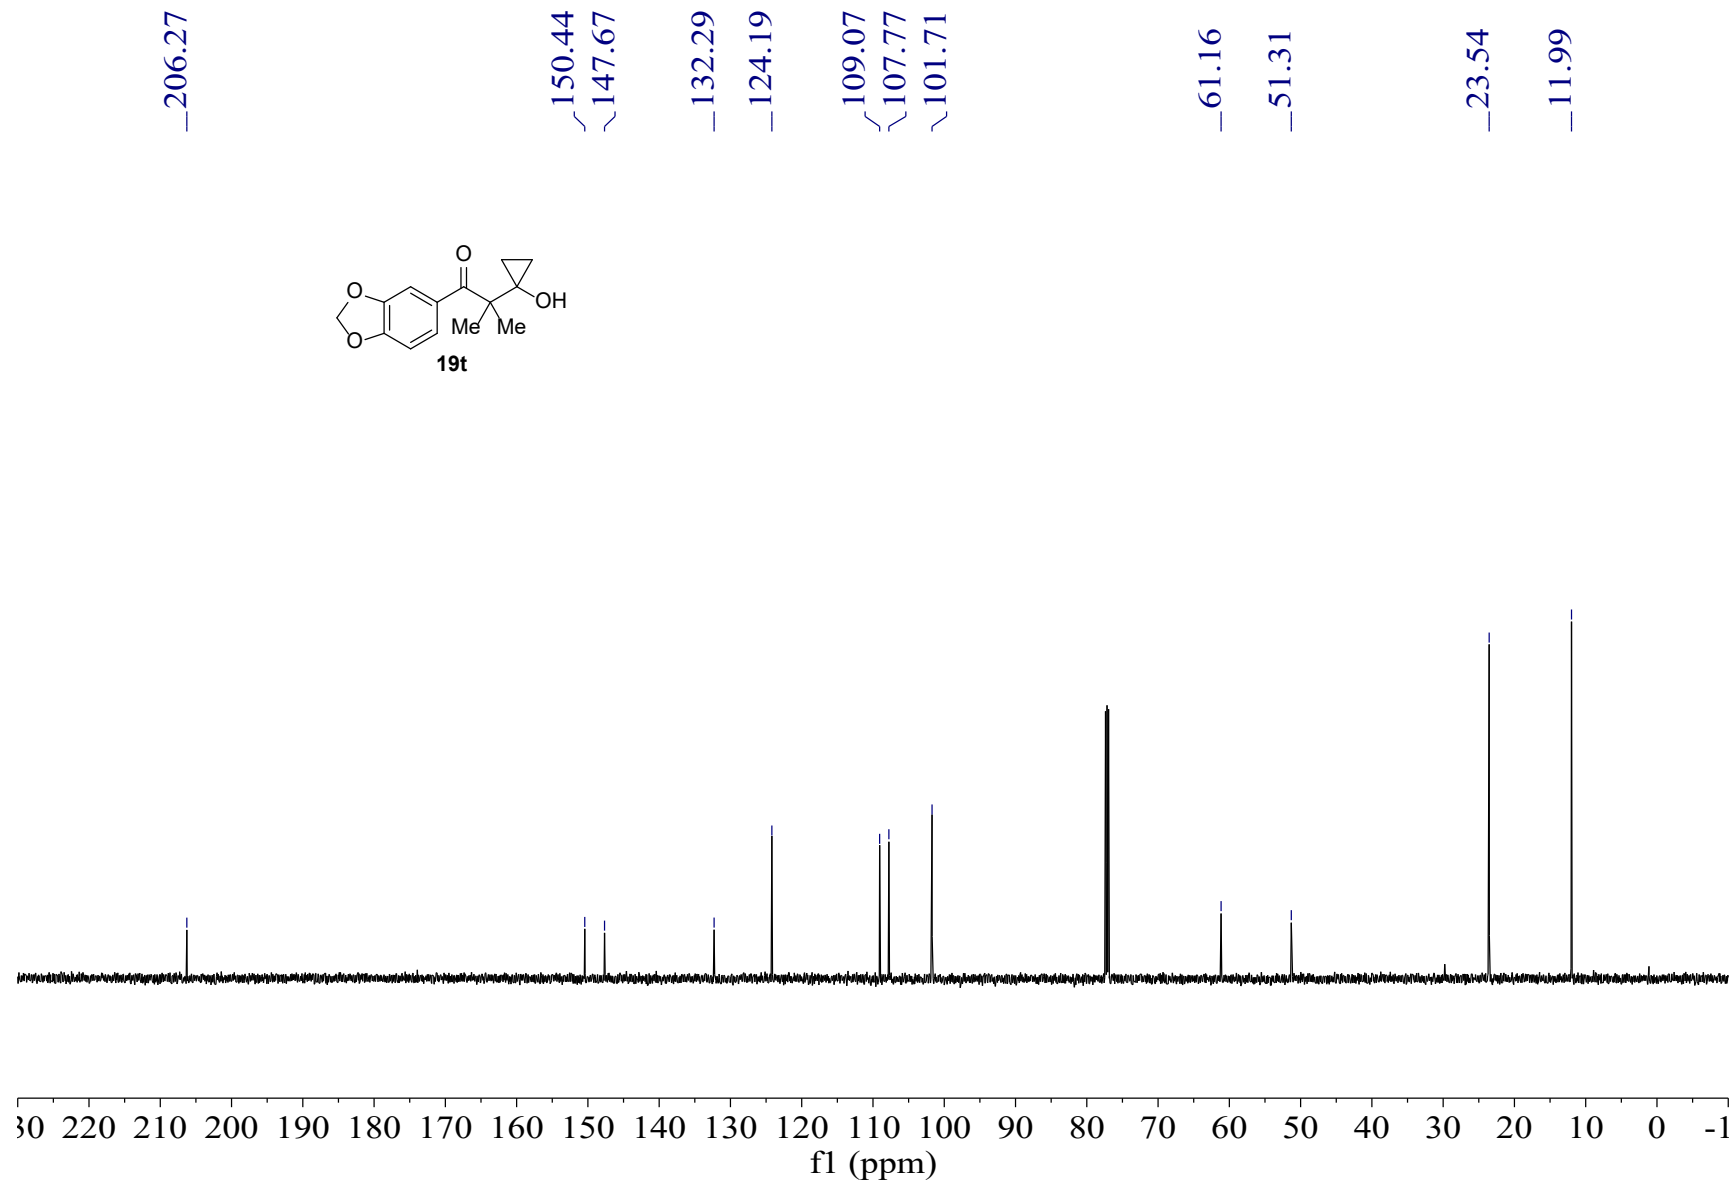

$^{13}\text{C}$  NMR spectrum of compound **19t**

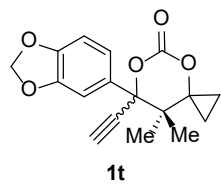

7.0539  
7.0348  
6.8066  
6.7860

5.9869

2.8836  
1.3027  
1.2824  
1.2653  
1.2554  
1.2361  
1.2277  
1.2184  
1.2092  
1.1910  
0.9778  
0.9611  
0.9506  
0.9435  
0.9327  
0.9141  
0.8681  
0.7610  
0.7422  
0.7342  
0.7240  
0.7149  
0.6964

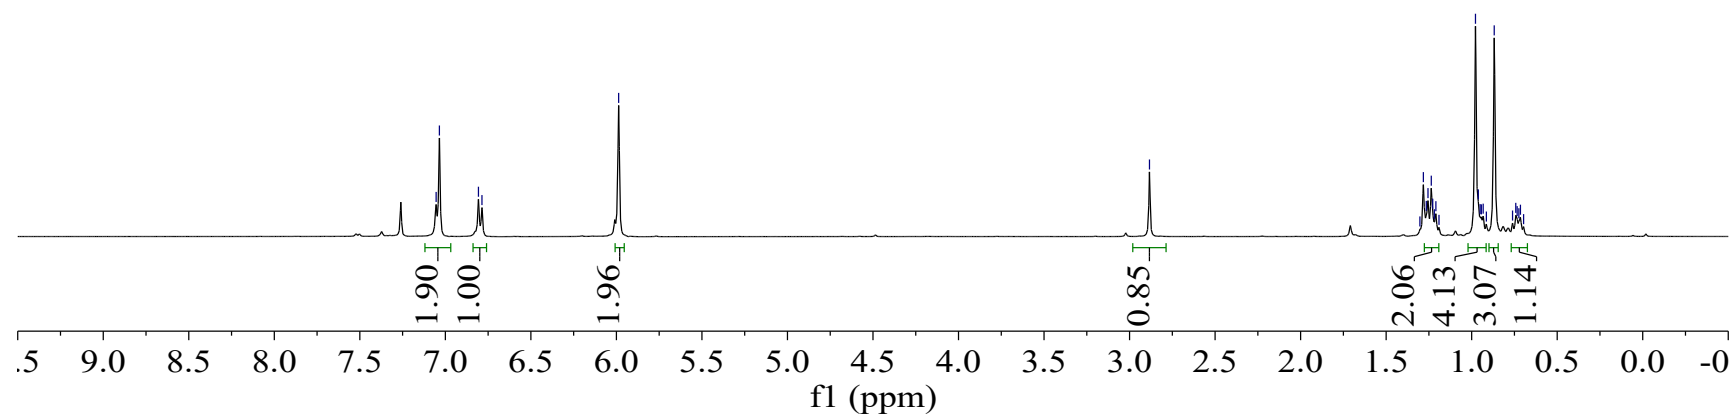

<sup>1</sup>H NMR spectrum of compound **1t**

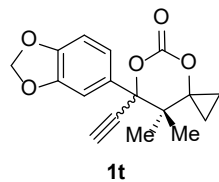

148.27  
 { 148.08  
 { 147.33  
 - 129.75  
 - 121.31  
 108.18  
 { 107.45  
 { 101.60  
 - 86.10  
 - 81.13  
 { 78.24  
 { 70.27  
 - 38.18  
 19.81  
 { 19.70  
 { 12.34  
 { 7.44

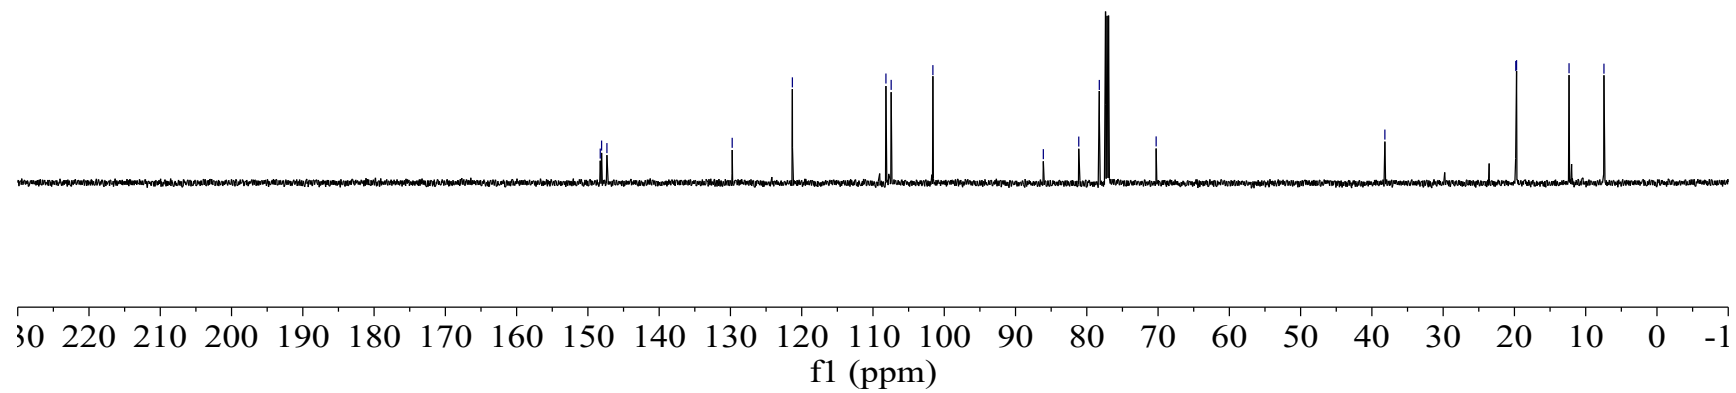

<sup>13</sup>C NMR spectrum of compound **1t**

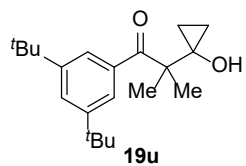

7.6359  
7.5494

3.0425

1.3463  
1.3222  
1.3132  
1.2950  
0.8527  
0.8315  
0.8262  
0.8213  
0.8124  
0.8076  
0.8015  
0.7795

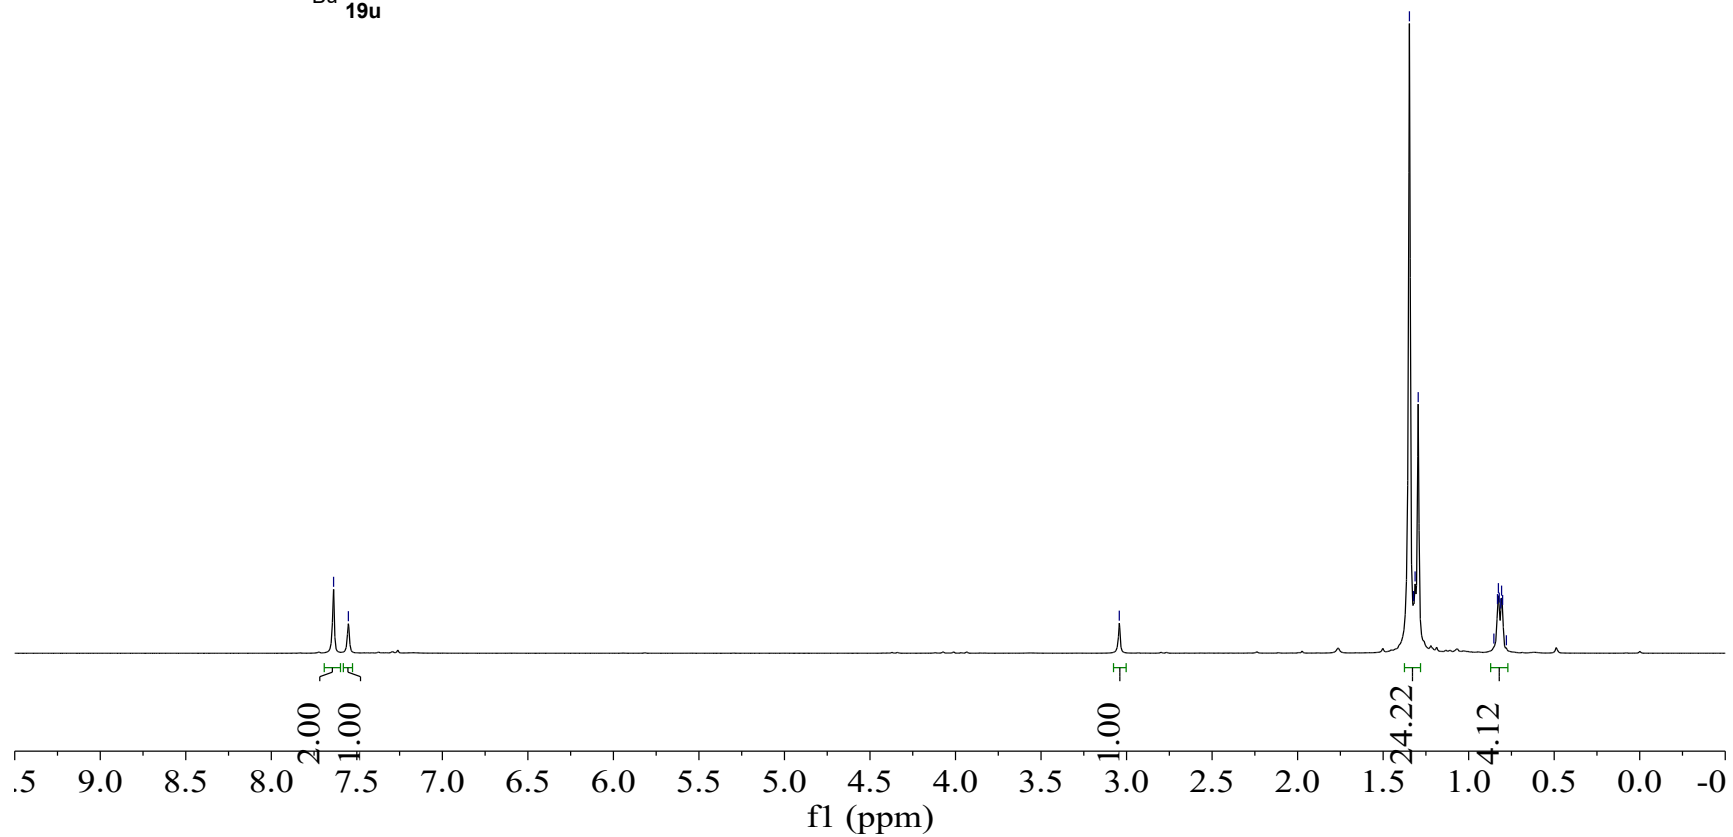

<sup>1</sup>H NMR spectrum of compound **19u**

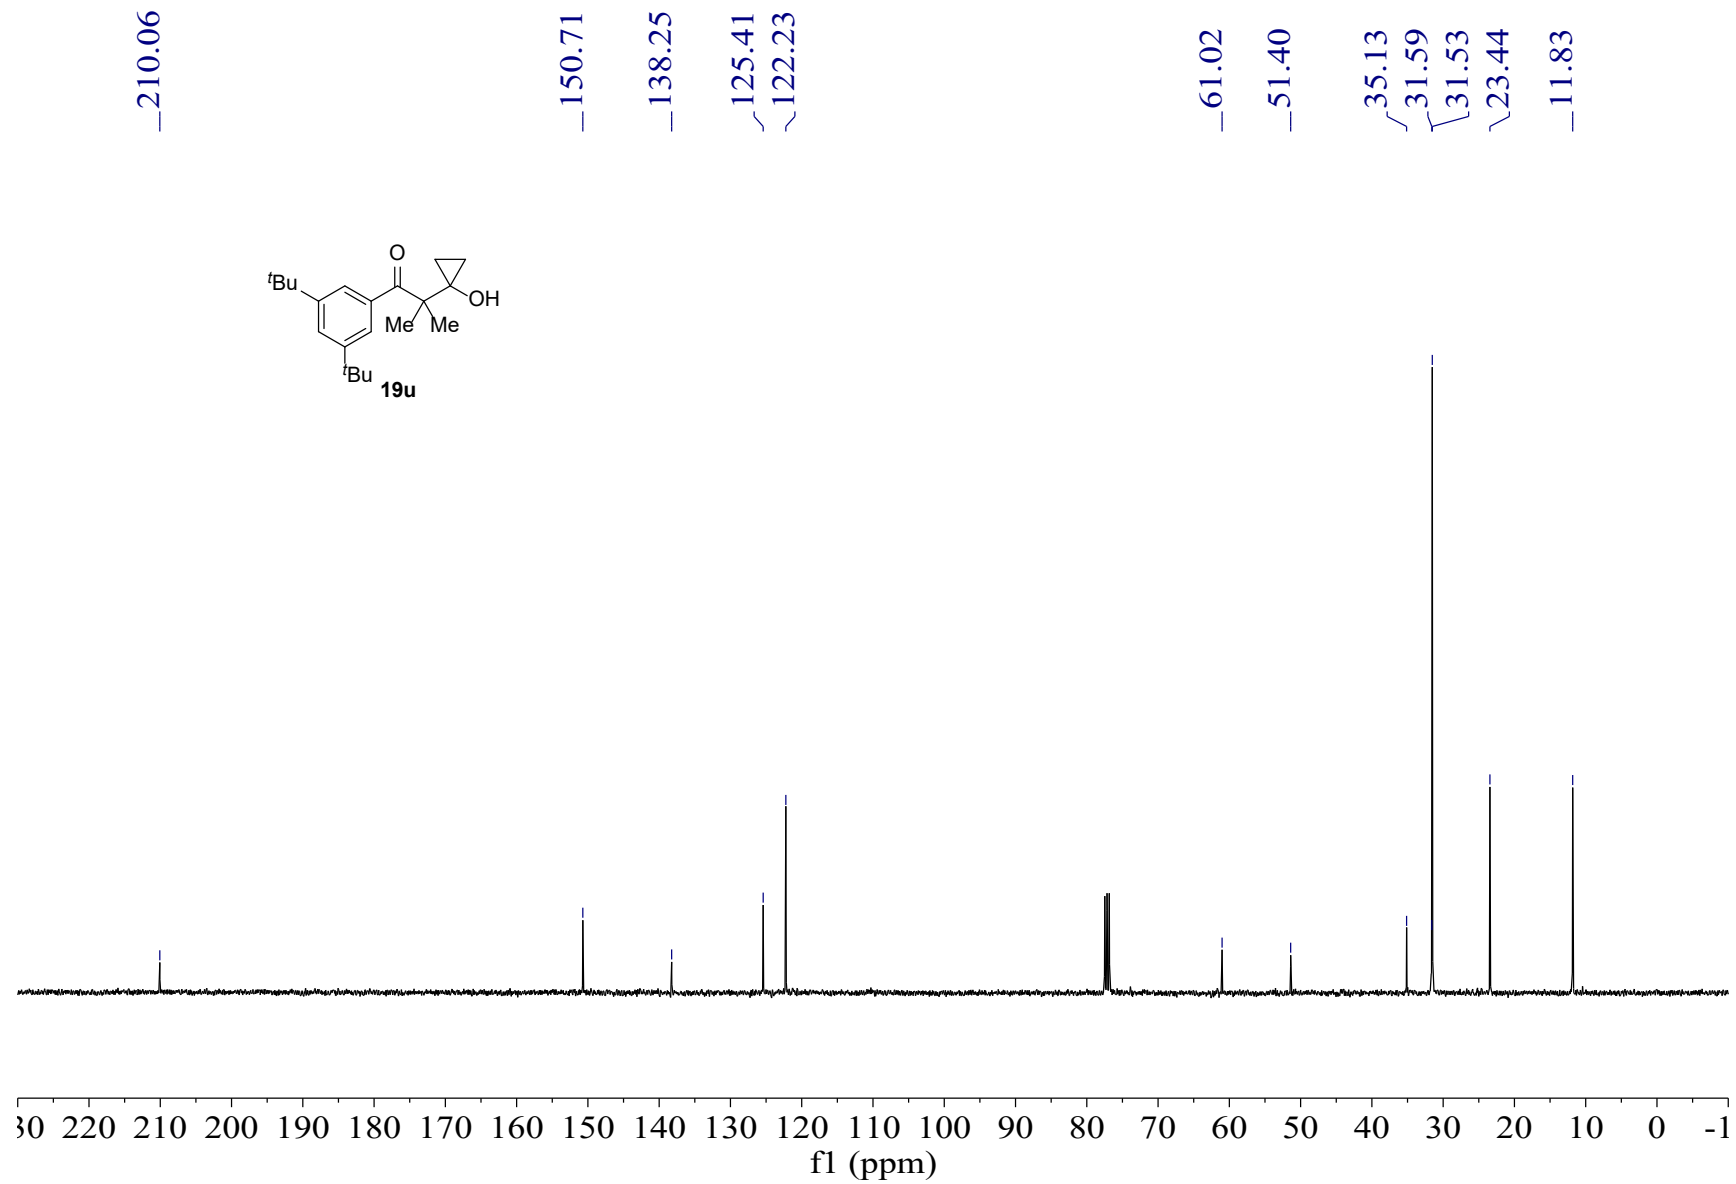

<sup>13</sup>C NMR spectrum of compound **19u**

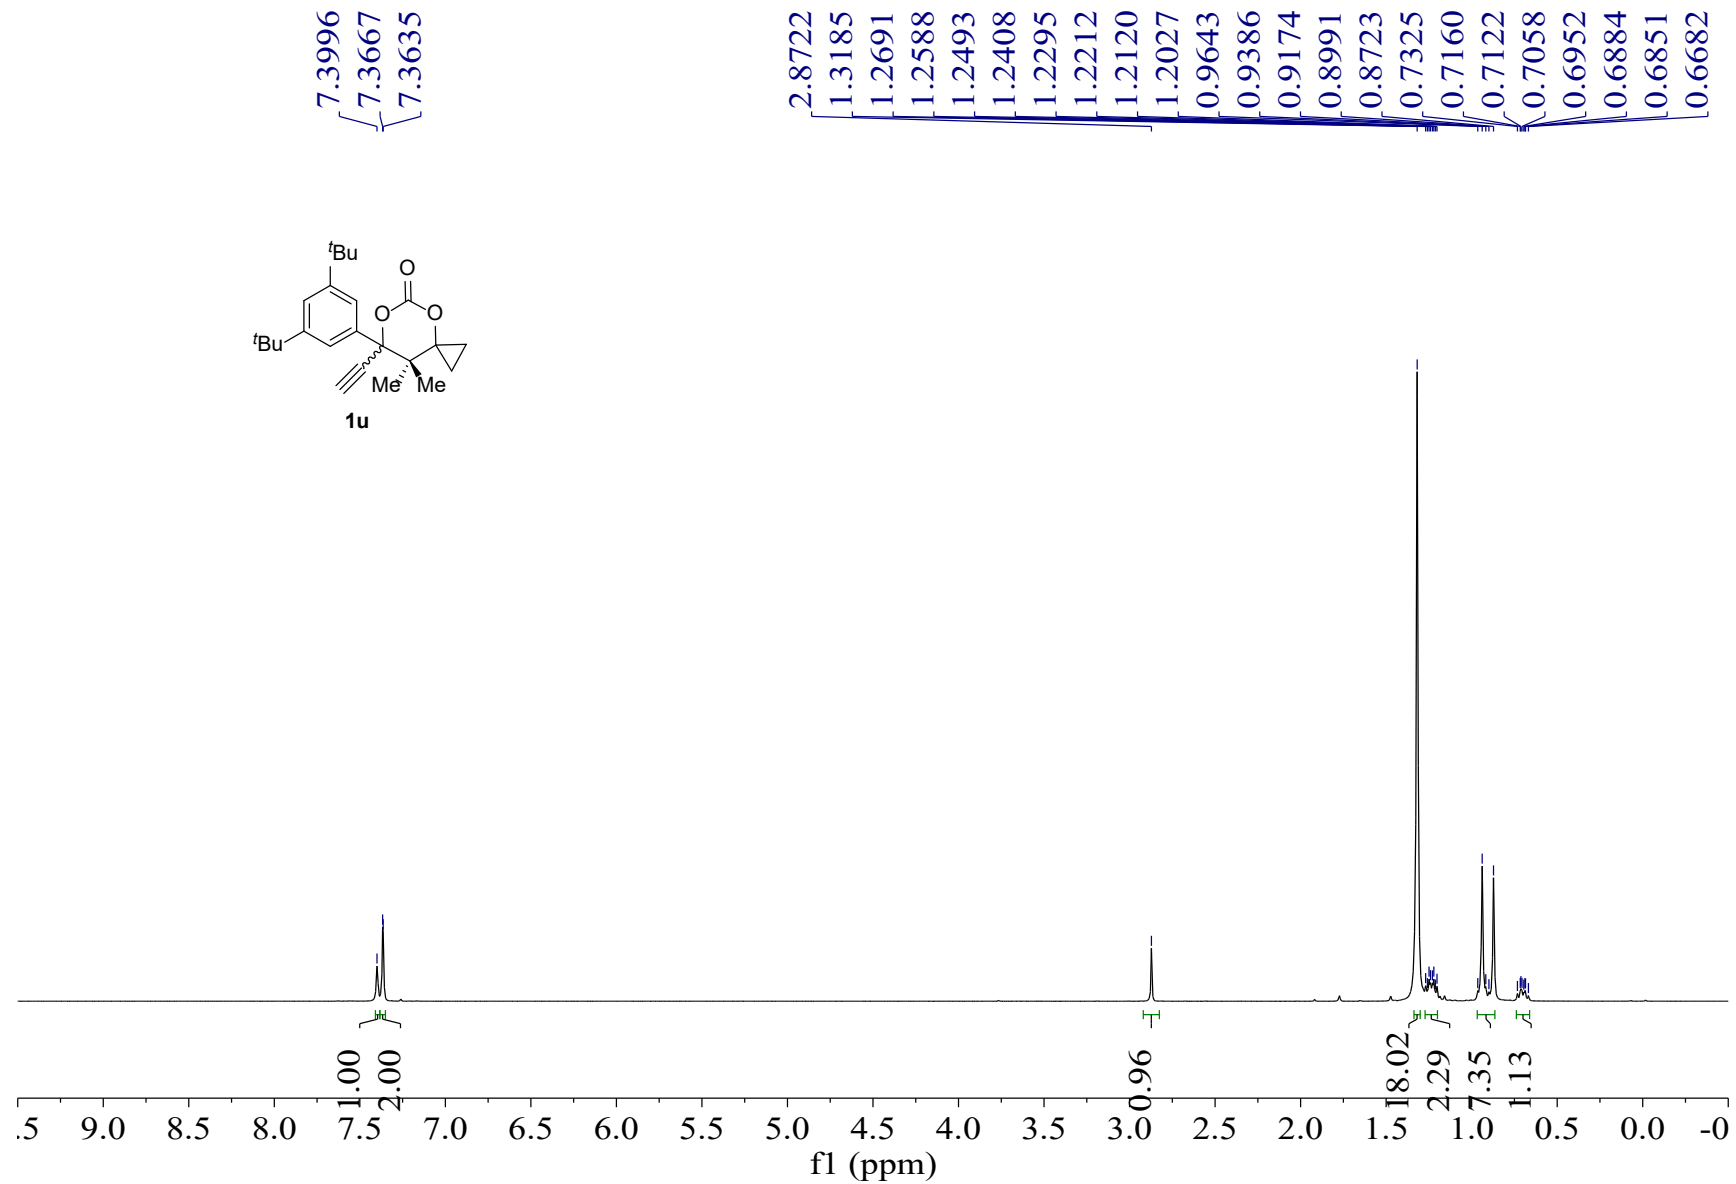

<sup>1</sup>H NMR spectrum of compound **1u**



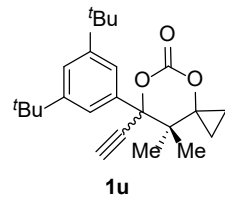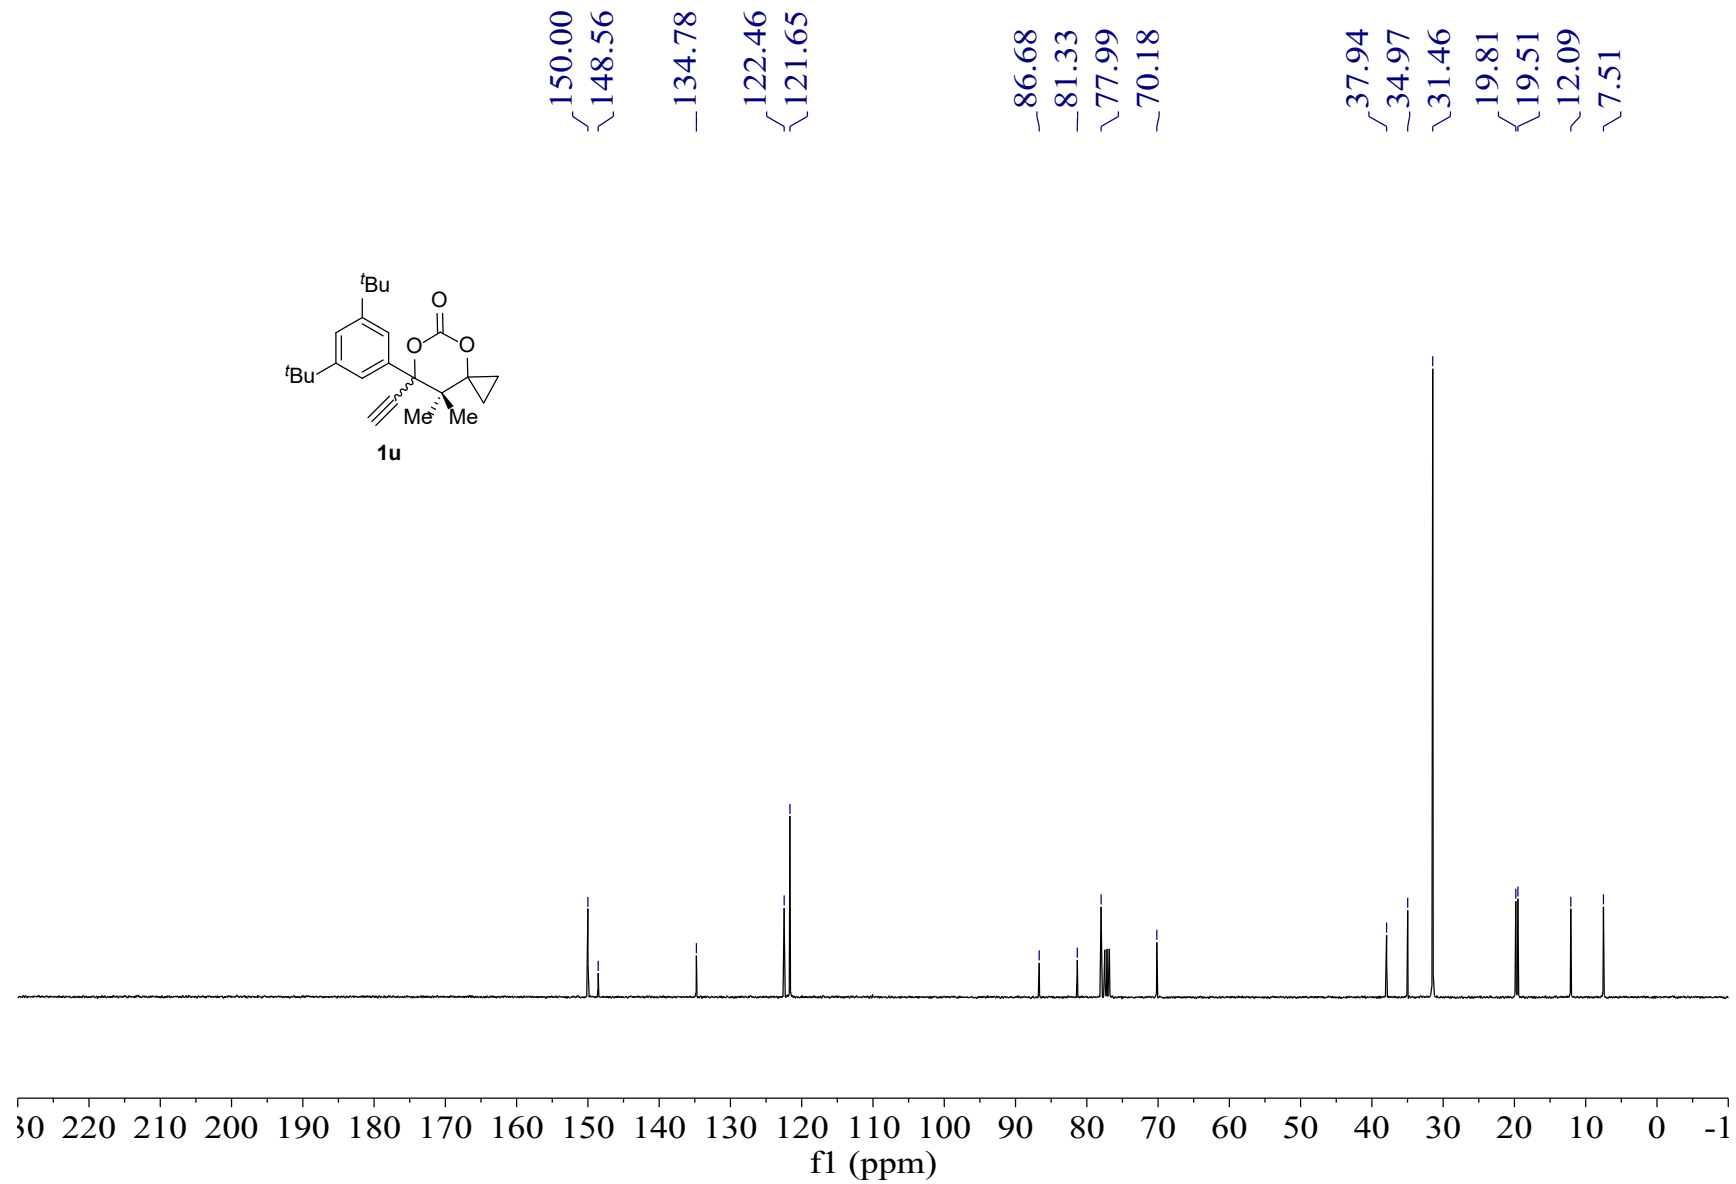

<sup>13</sup>C NMR spectrum of compound **1u**

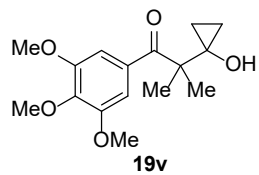

7.1603

3.8687

2.9745

1.2568  
0.8792  
0.8571  
0.8517  
0.8476  
0.8402  
0.8360  
0.8307  
0.8085

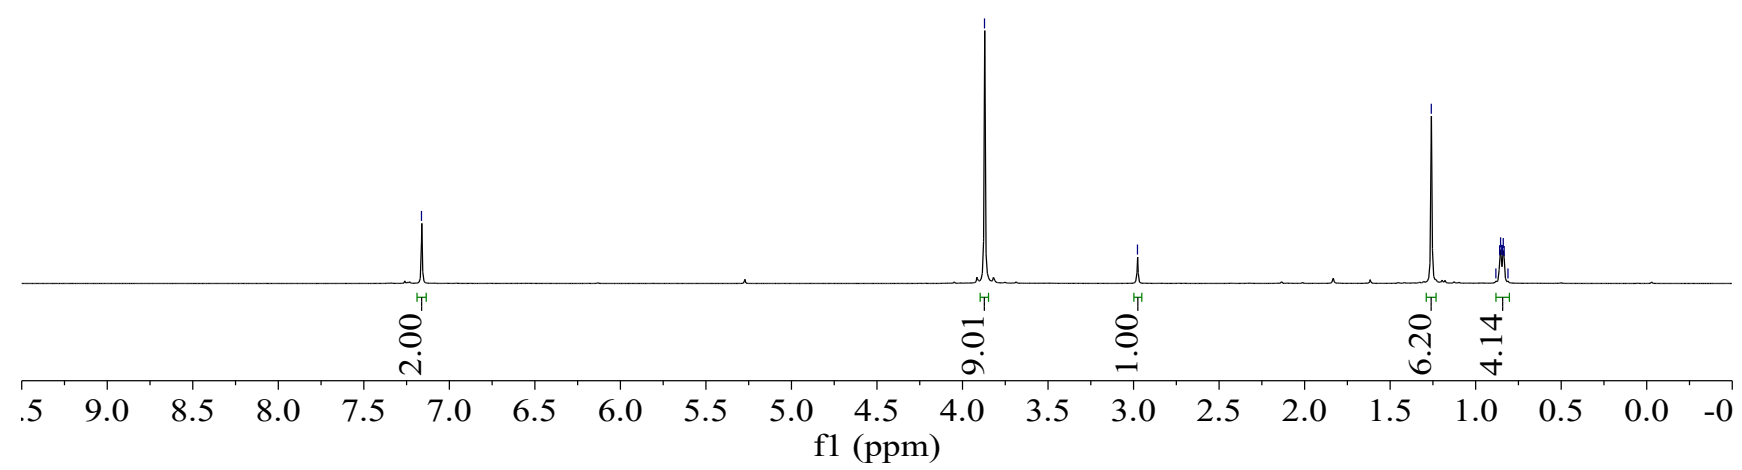

<sup>1</sup>H NMR spectrum of compound **19v**

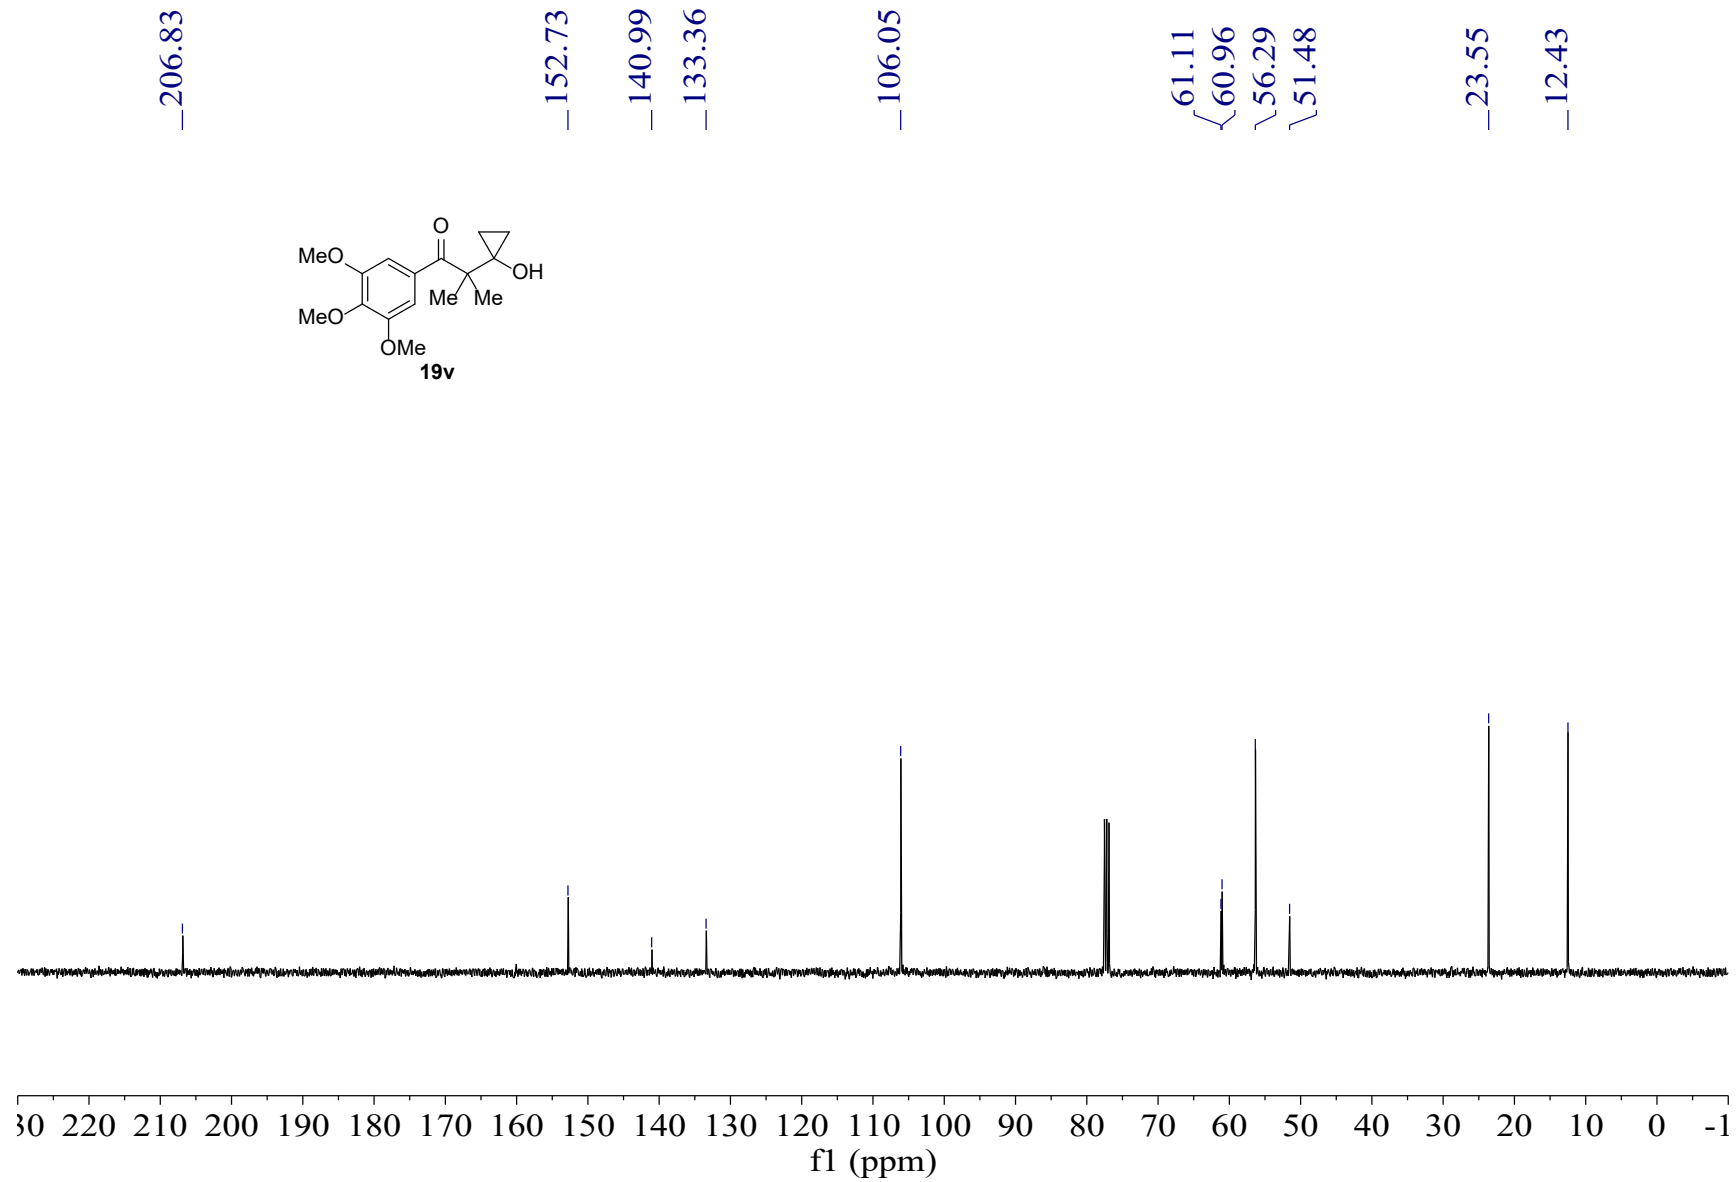

$^{13}\text{C}$  NMR spectrum of compound **19v**

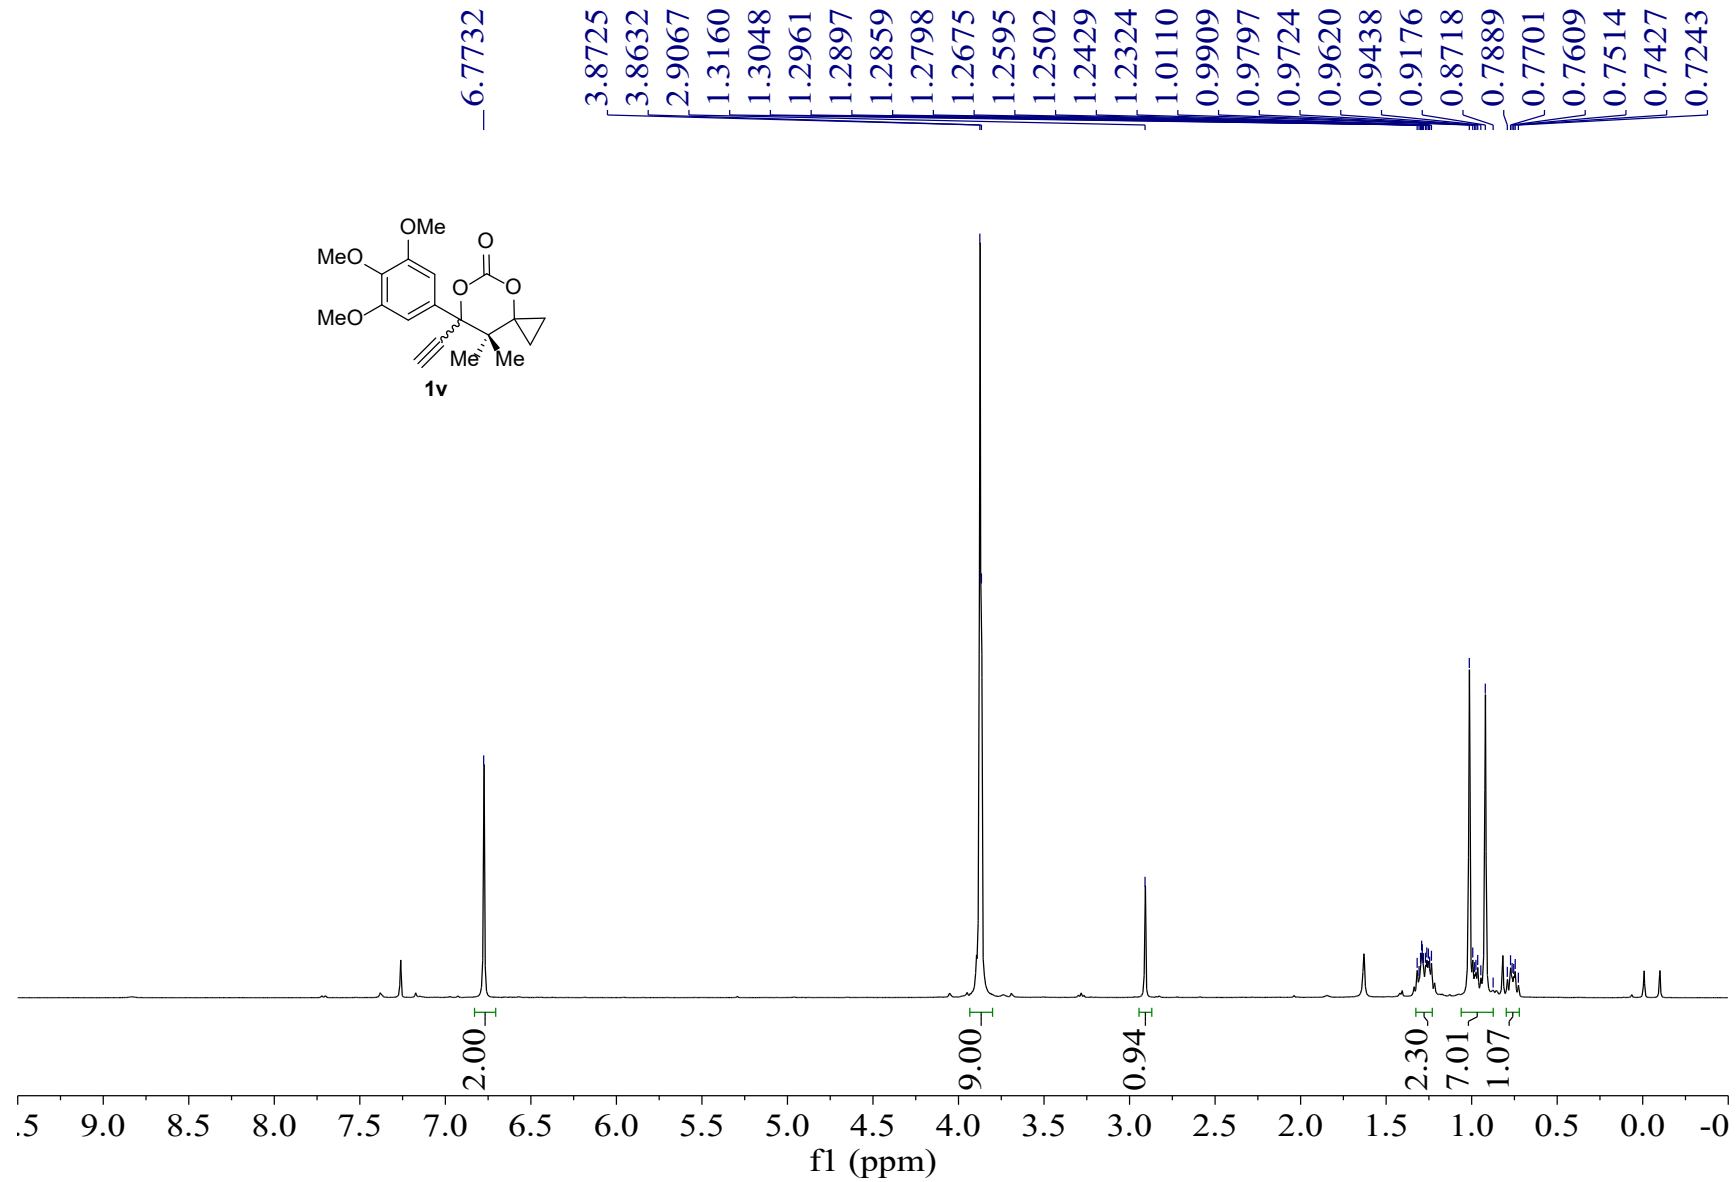

<sup>1</sup>H NMR spectrum of compound **1v**

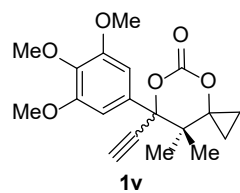

152.56  
148.31  
138.58  
131.34

105.12

86.12  
81.06  
78.32  
70.37  
61.03  
56.49

38.22

19.89  
19.84  
12.45  
7.45

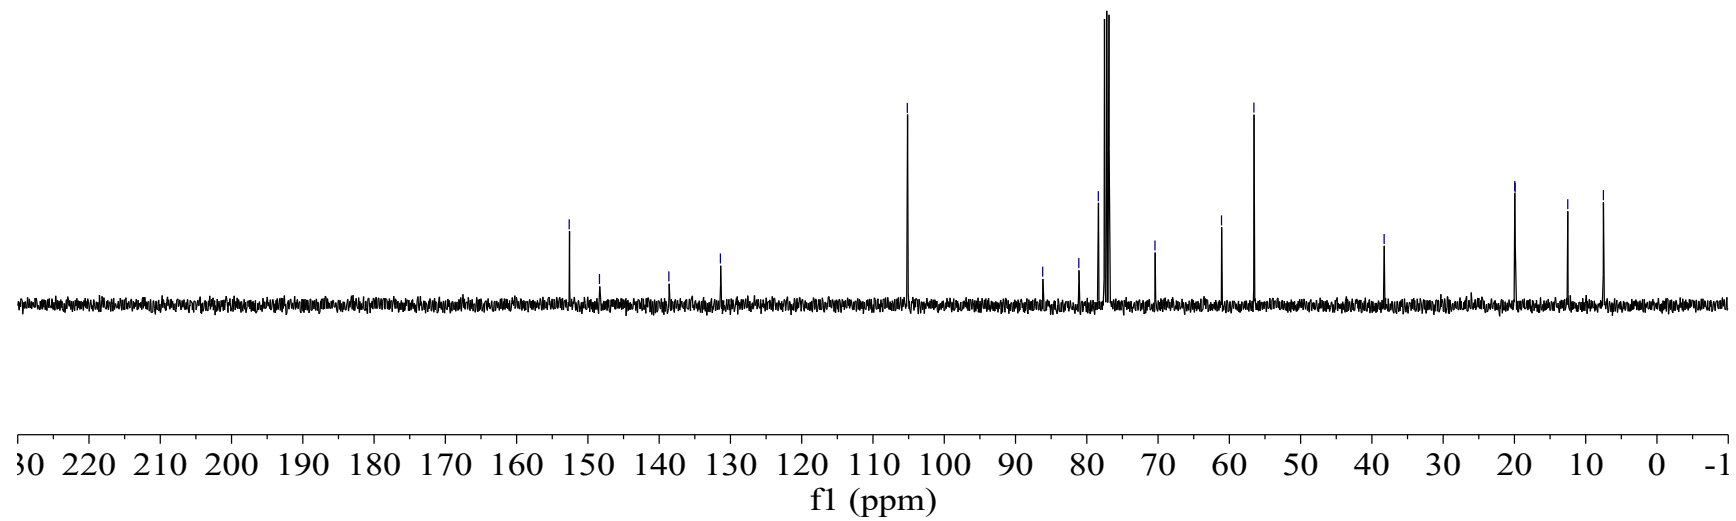

<sup>13</sup>C NMR spectrum of compound **1v**

8.3210  
7.9187  
7.9055  
7.8709  
7.8637  
7.8567  
7.8508  
7.8335  
7.8191  
7.5776  
7.5662  
7.5529  
7.5454  
7.5334  
7.5212

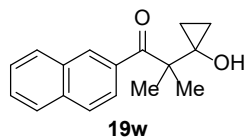

— 3.1389

— 1.3531

0.8724  
0.8592  
0.8560  
0.8518  
0.8357  
0.8293  
0.8154

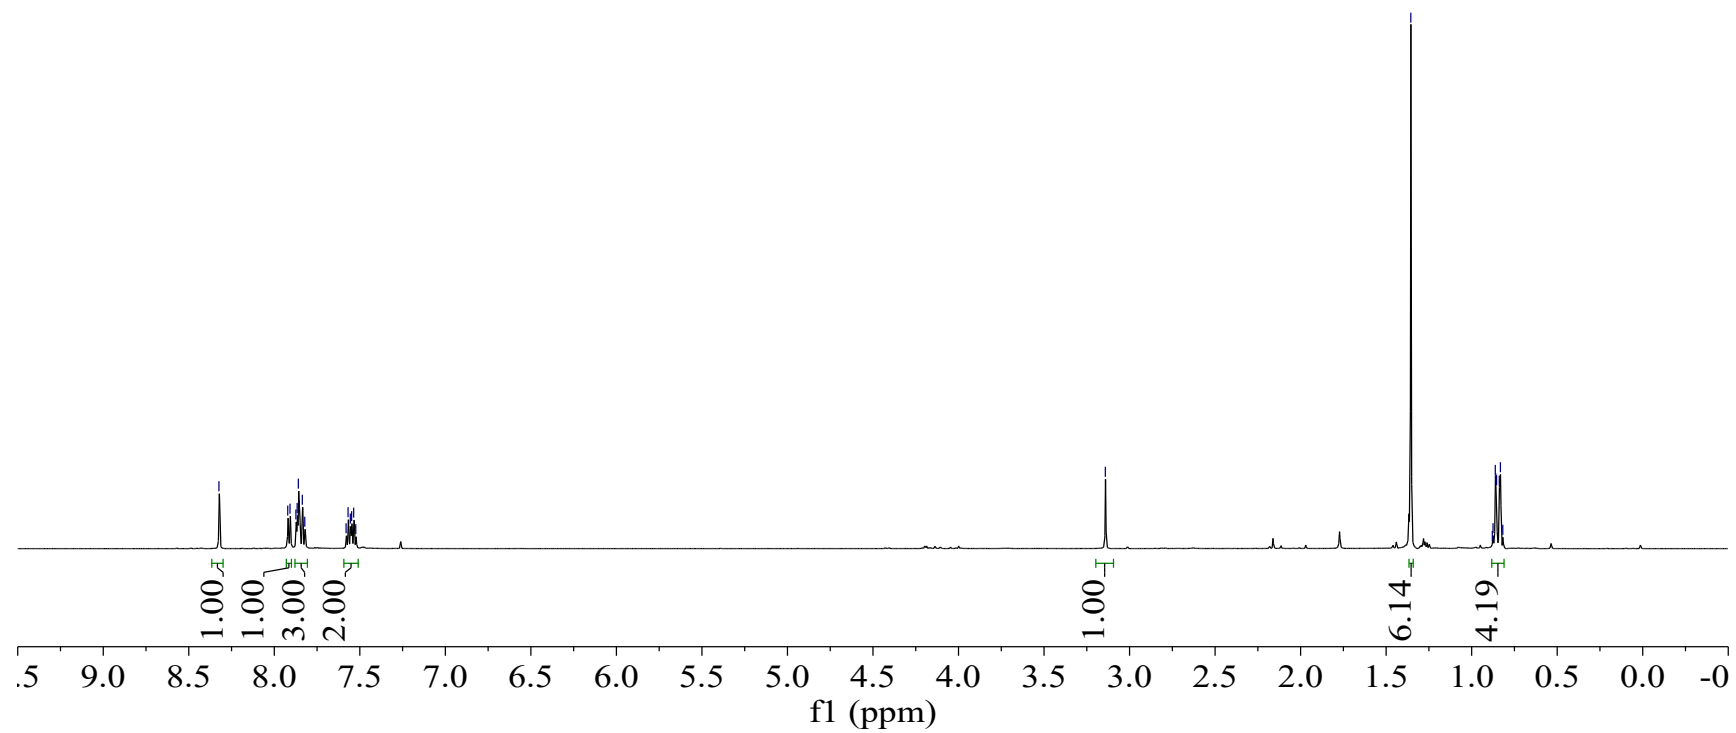

<sup>1</sup>H NMR spectrum of compound **19w**

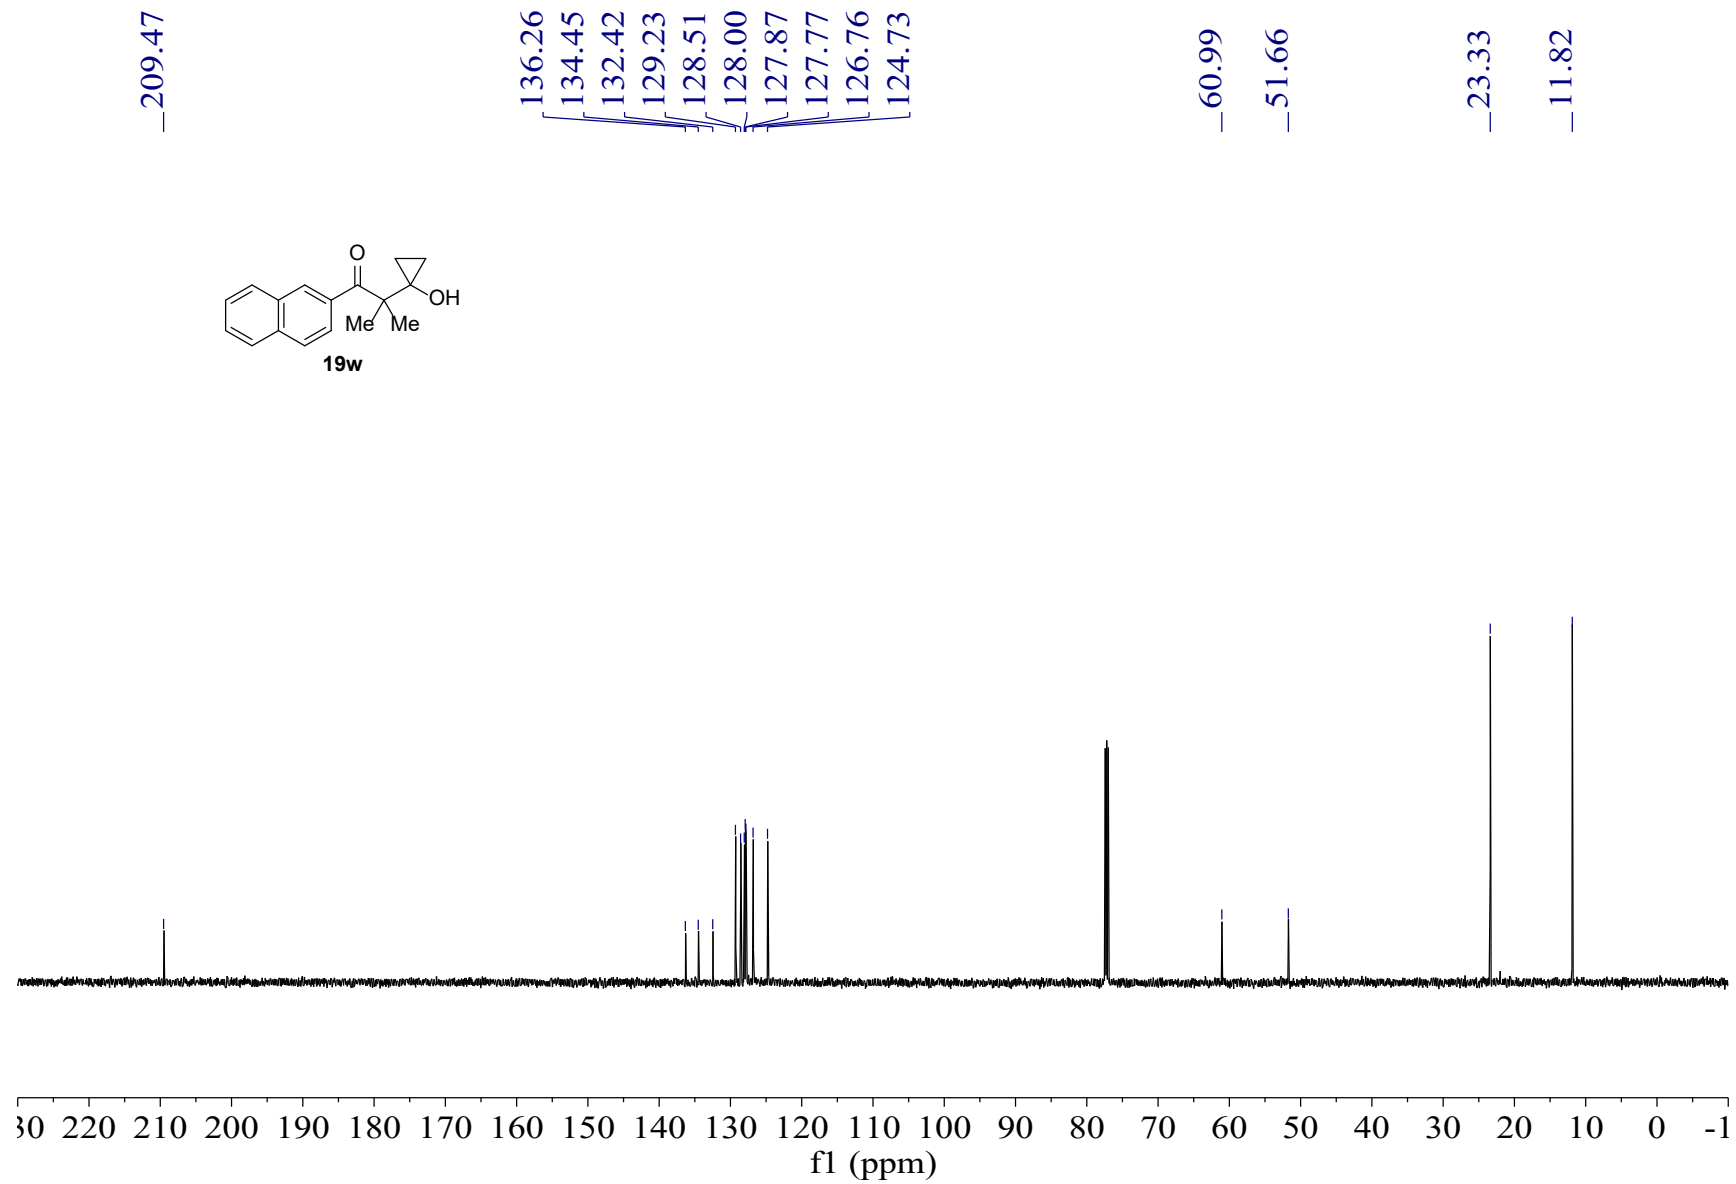

<sup>13</sup>C NMR spectrum of compound **19w**

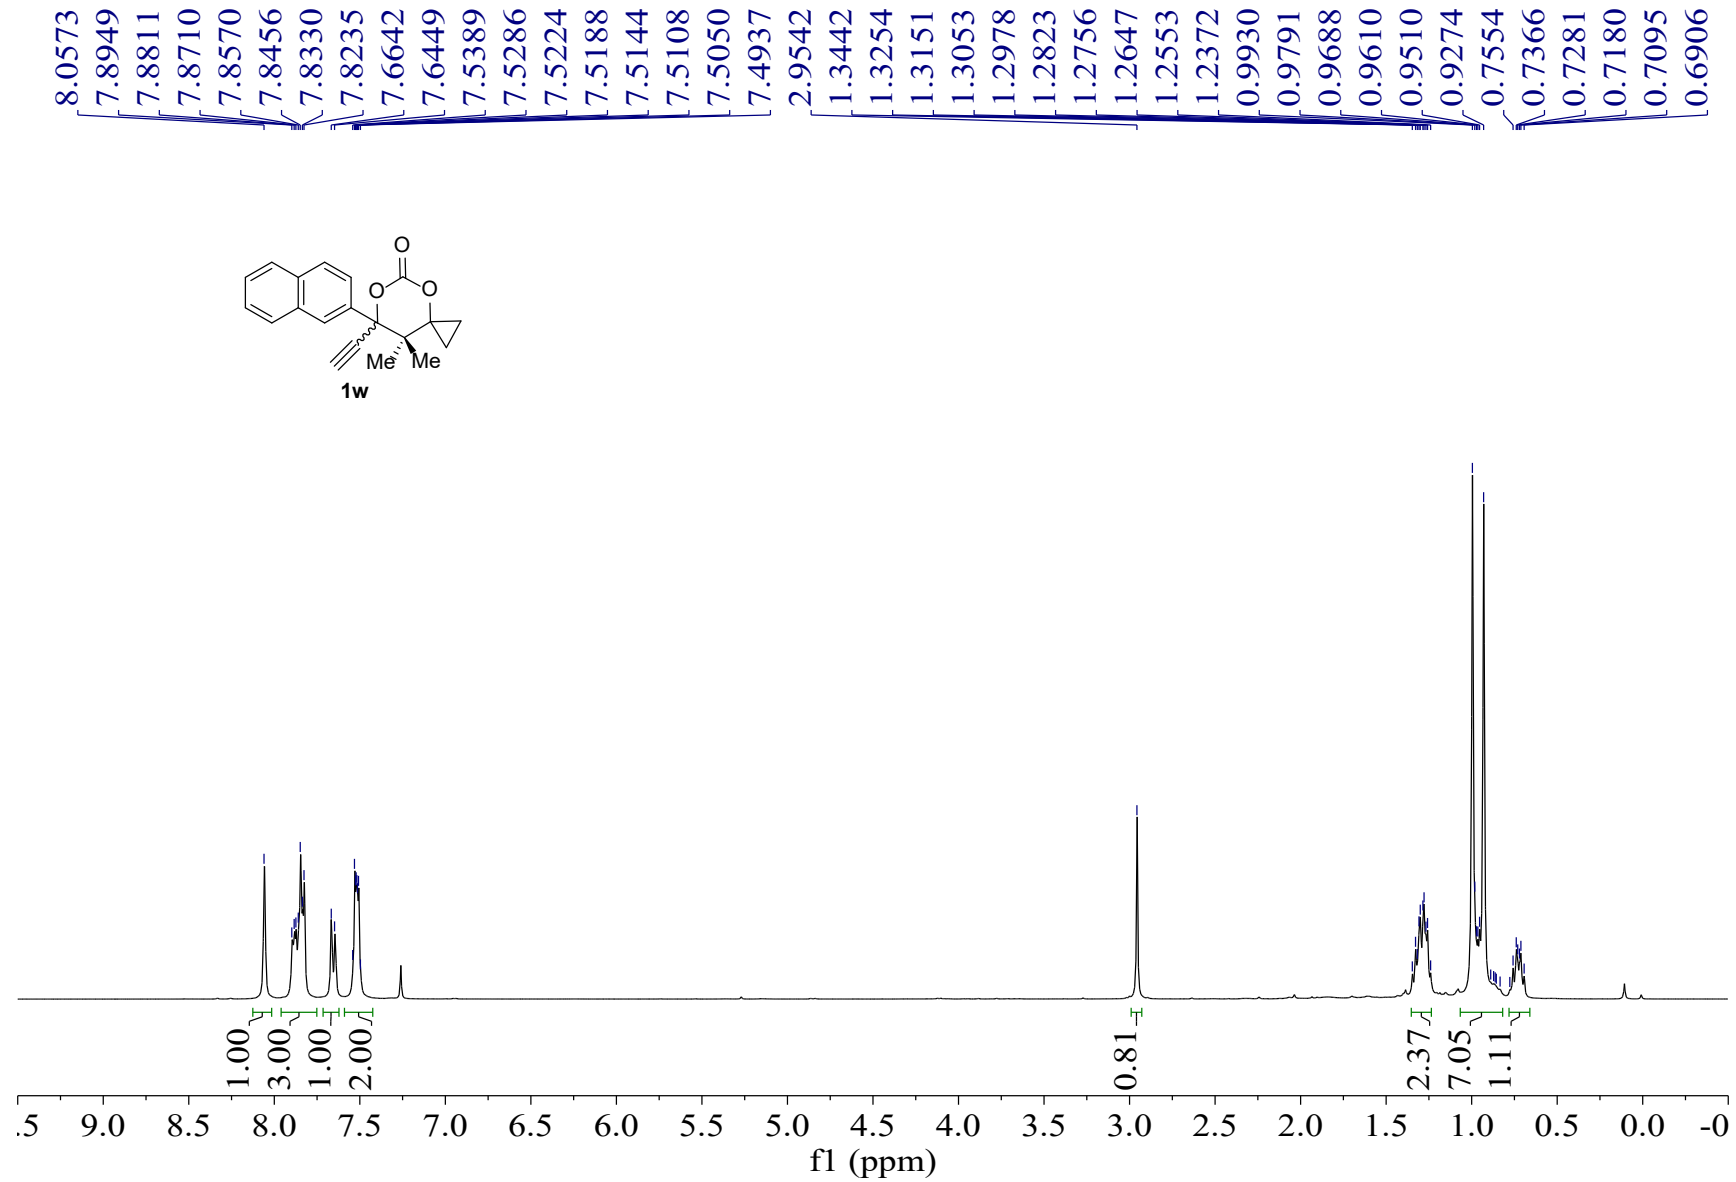

<sup>1</sup>H NMR spectrum of compound **1w**



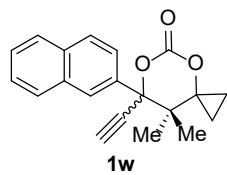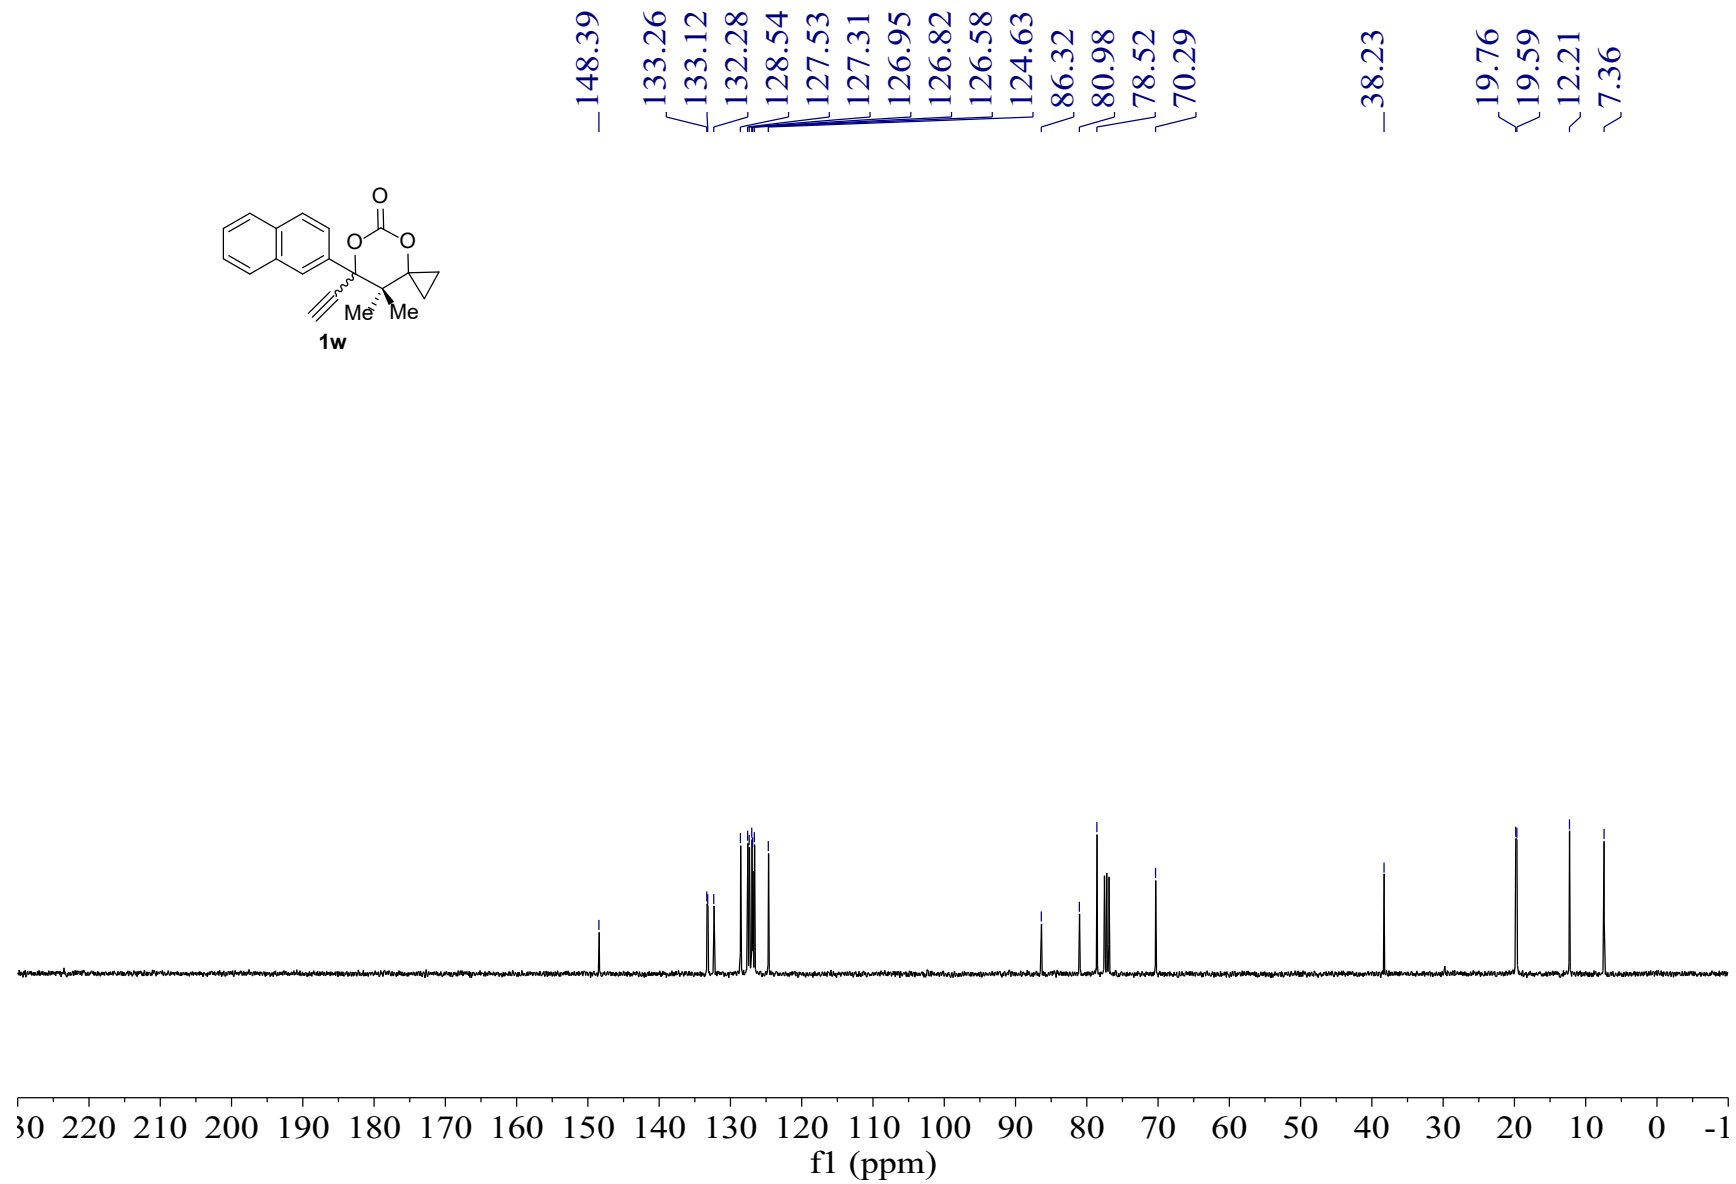

<sup>13</sup>C NMR spectrum of compound **1w**

7.7994  
7.7808

6.7722  
6.7508

4.6430  
4.6212  
4.5994

3.2481  
3.2260  
3.2062

1.3029  
0.8302  
0.8080  
0.8010  
0.7856  
0.7807  
0.7756  
0.7546

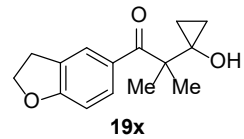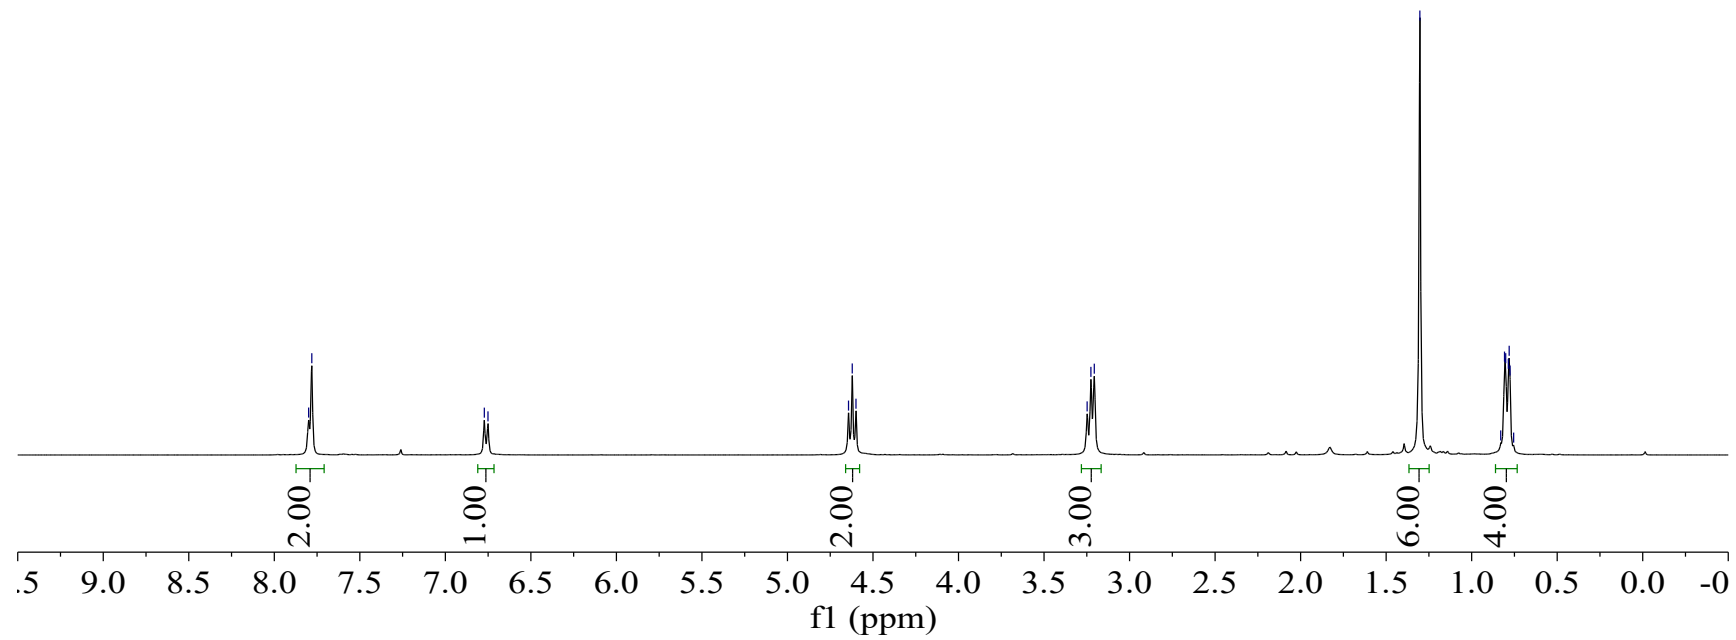

<sup>1</sup>H NMR spectrum of compound **19x**

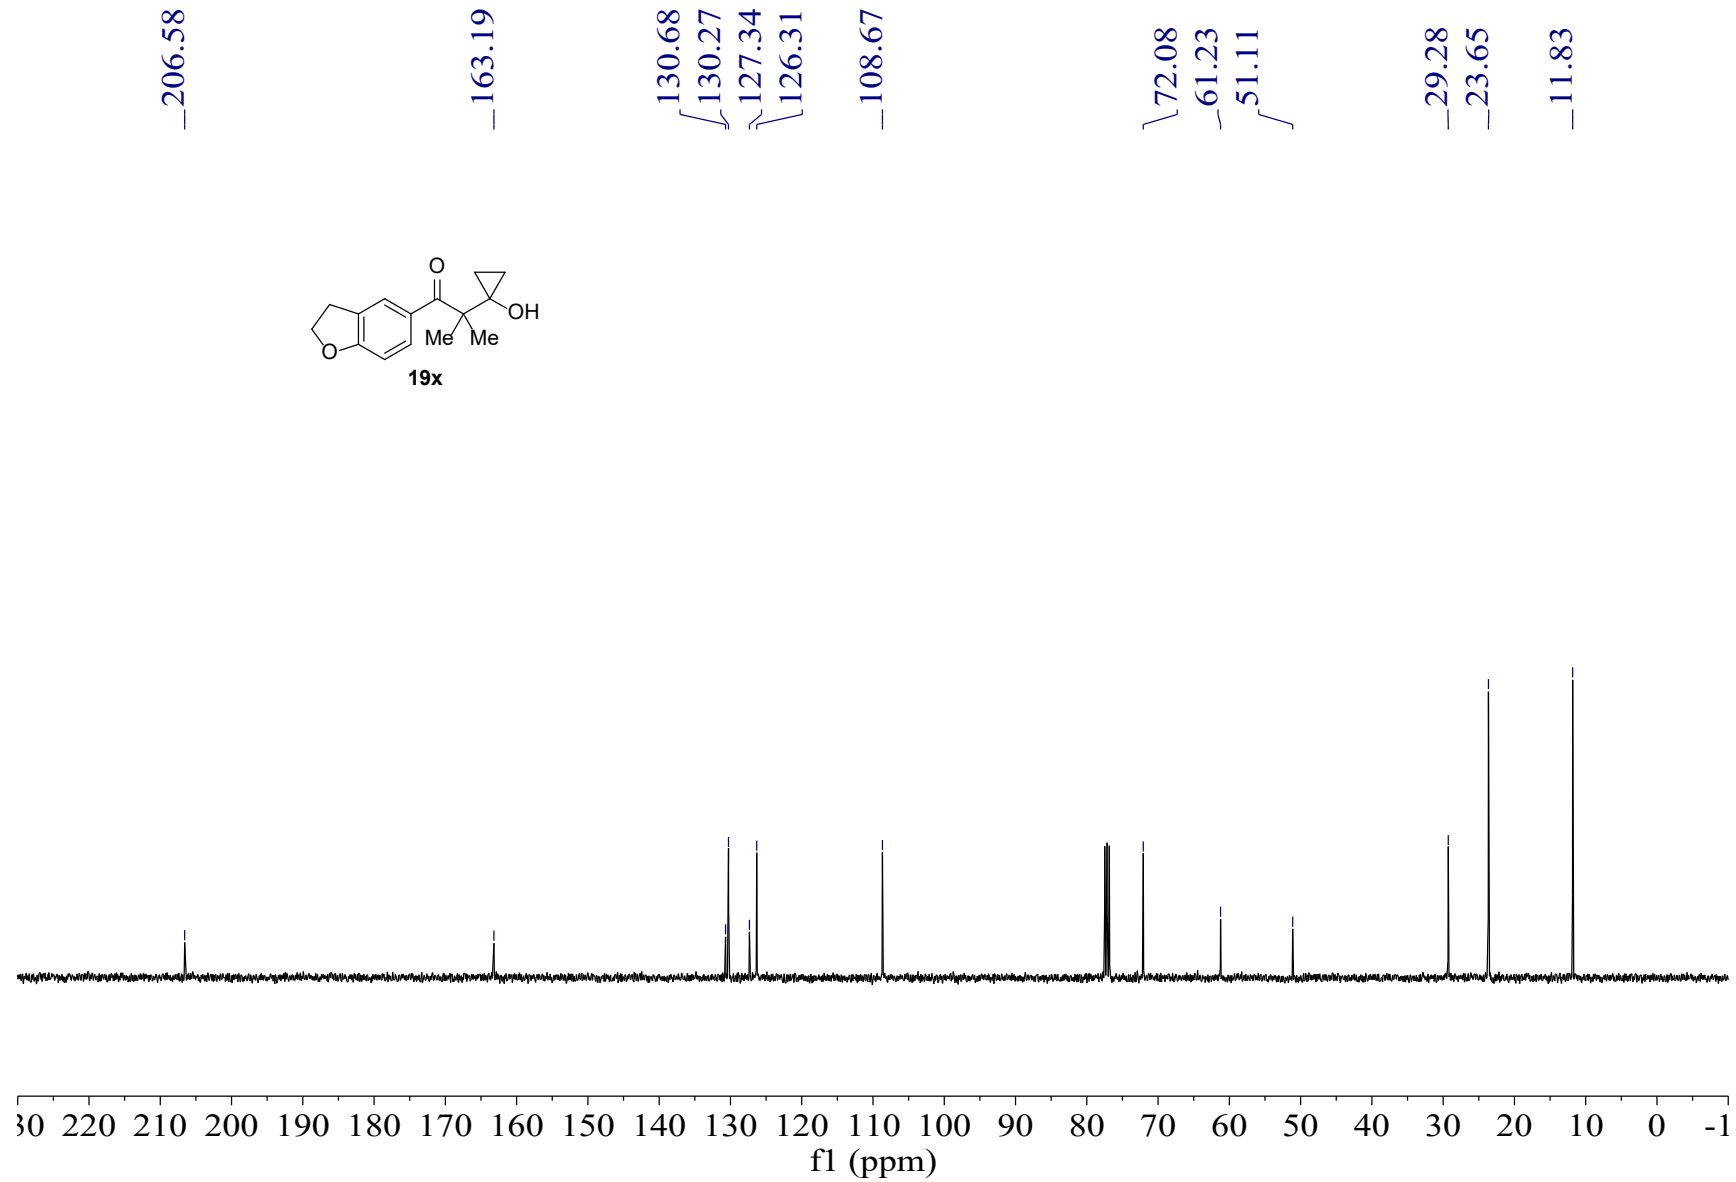

<sup>13</sup>C NMR spectrum of compound **19x**

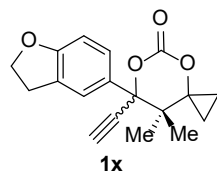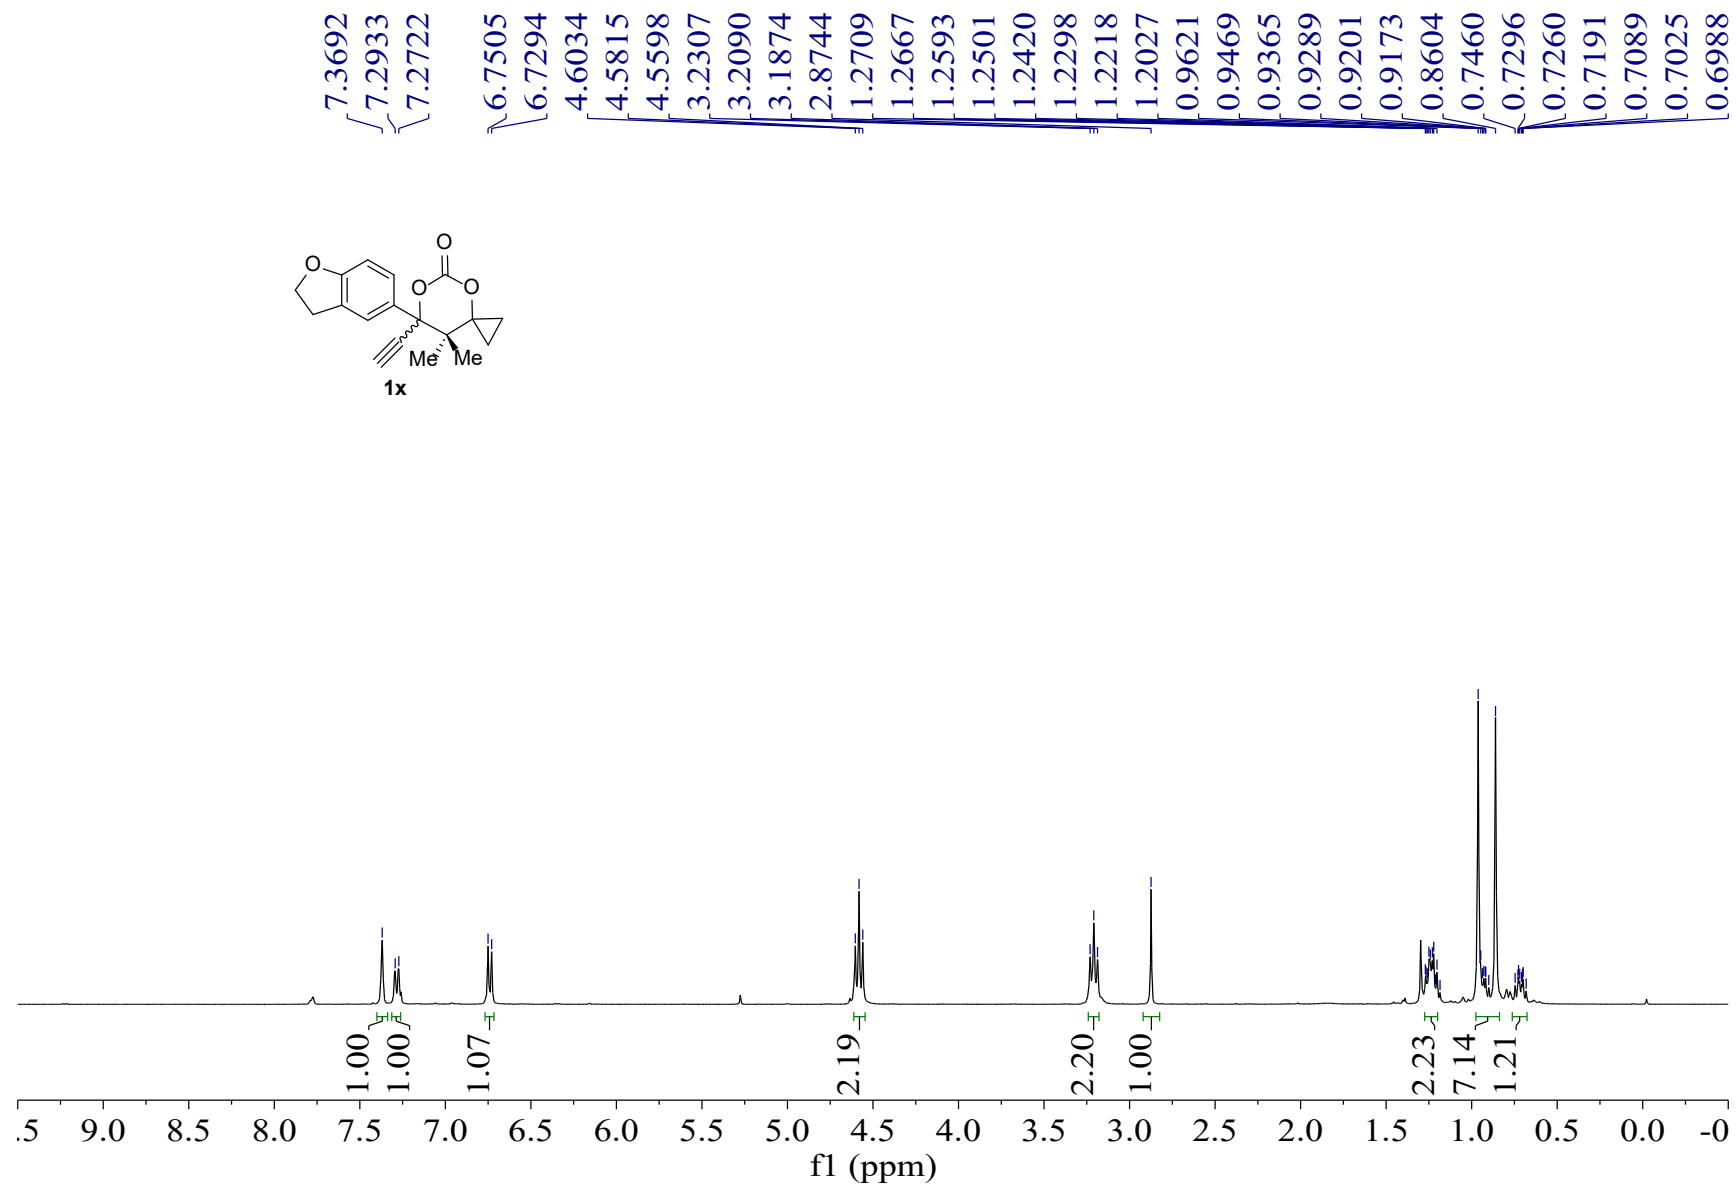

<sup>1</sup>H NMR spectrum of compound **1x**

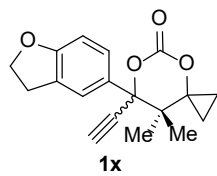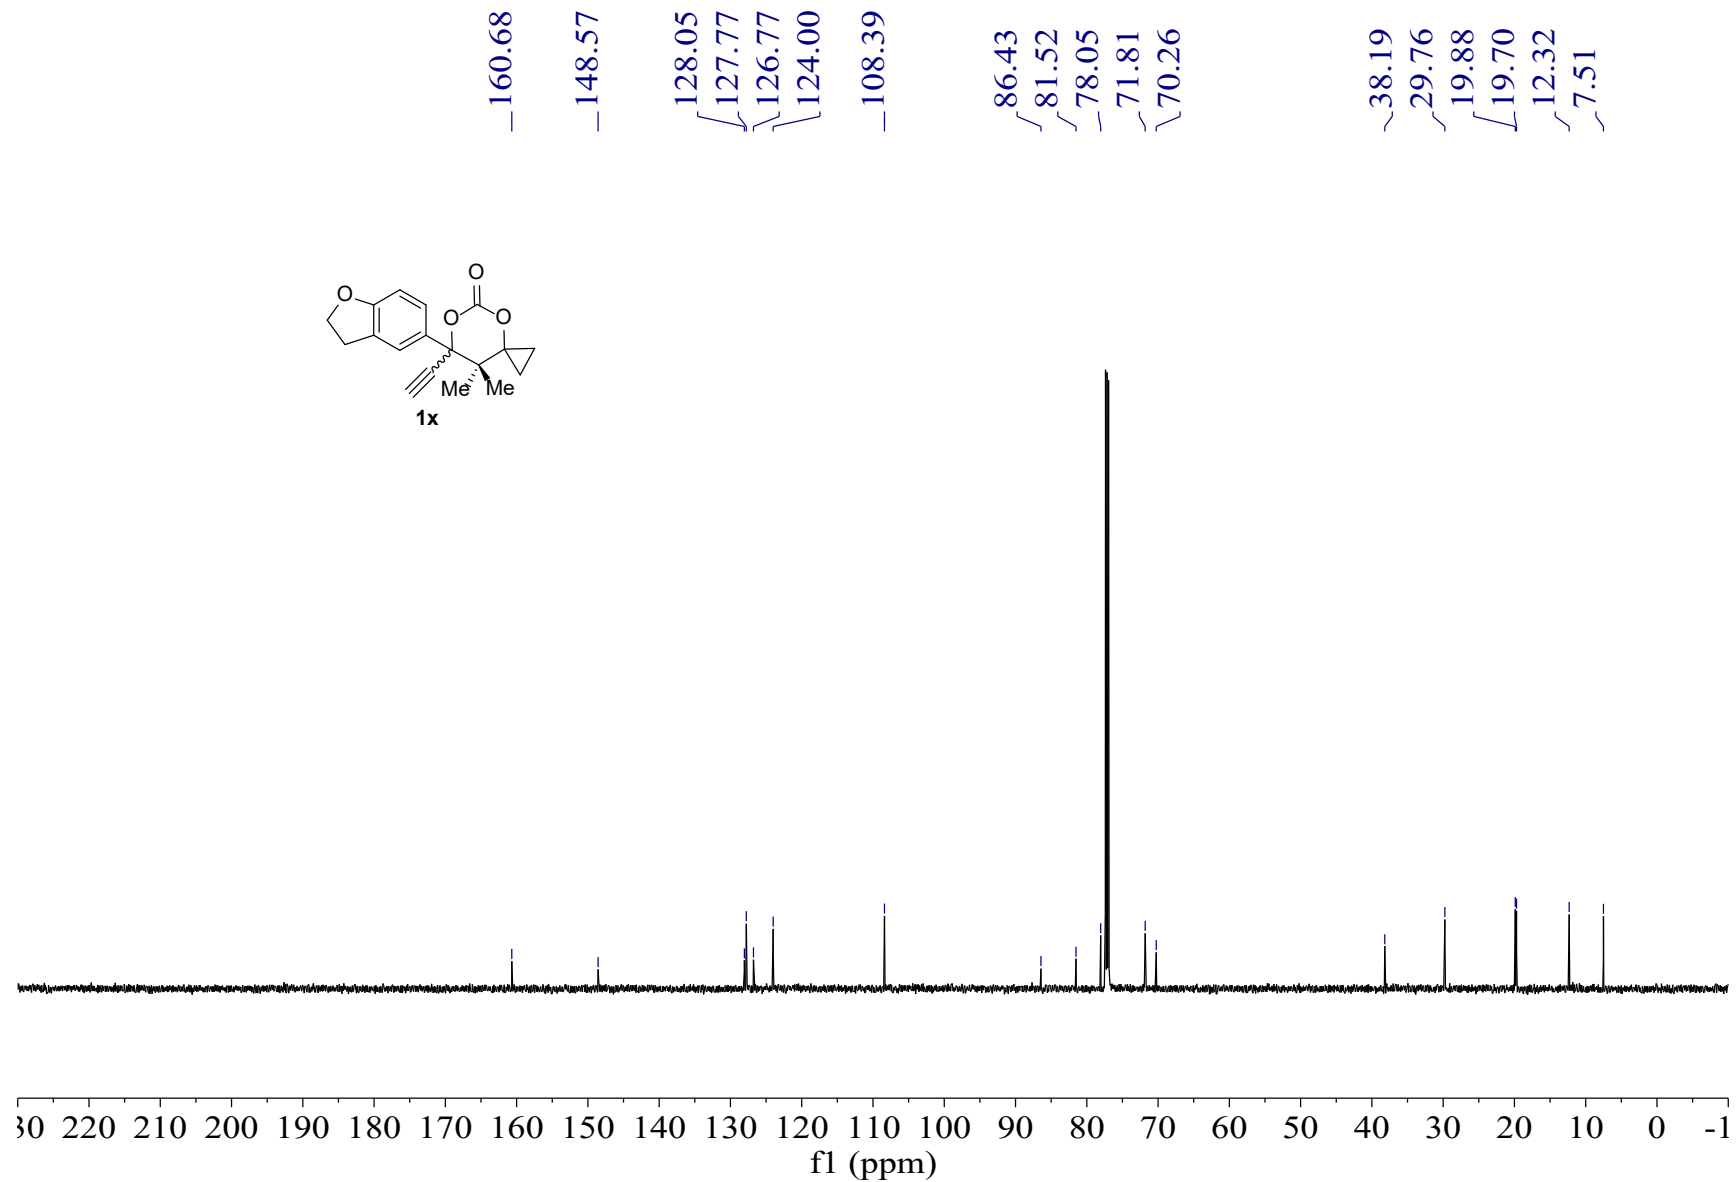

<sup>13</sup>C NMR spectrum of compound **1x**

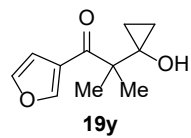

8.1089

7.3977

6.8181

6.8147

3.1861

1.2542

0.8110

0.7917

0.7871

0.7795

0.7514

0.7445

0.7397

0.7197

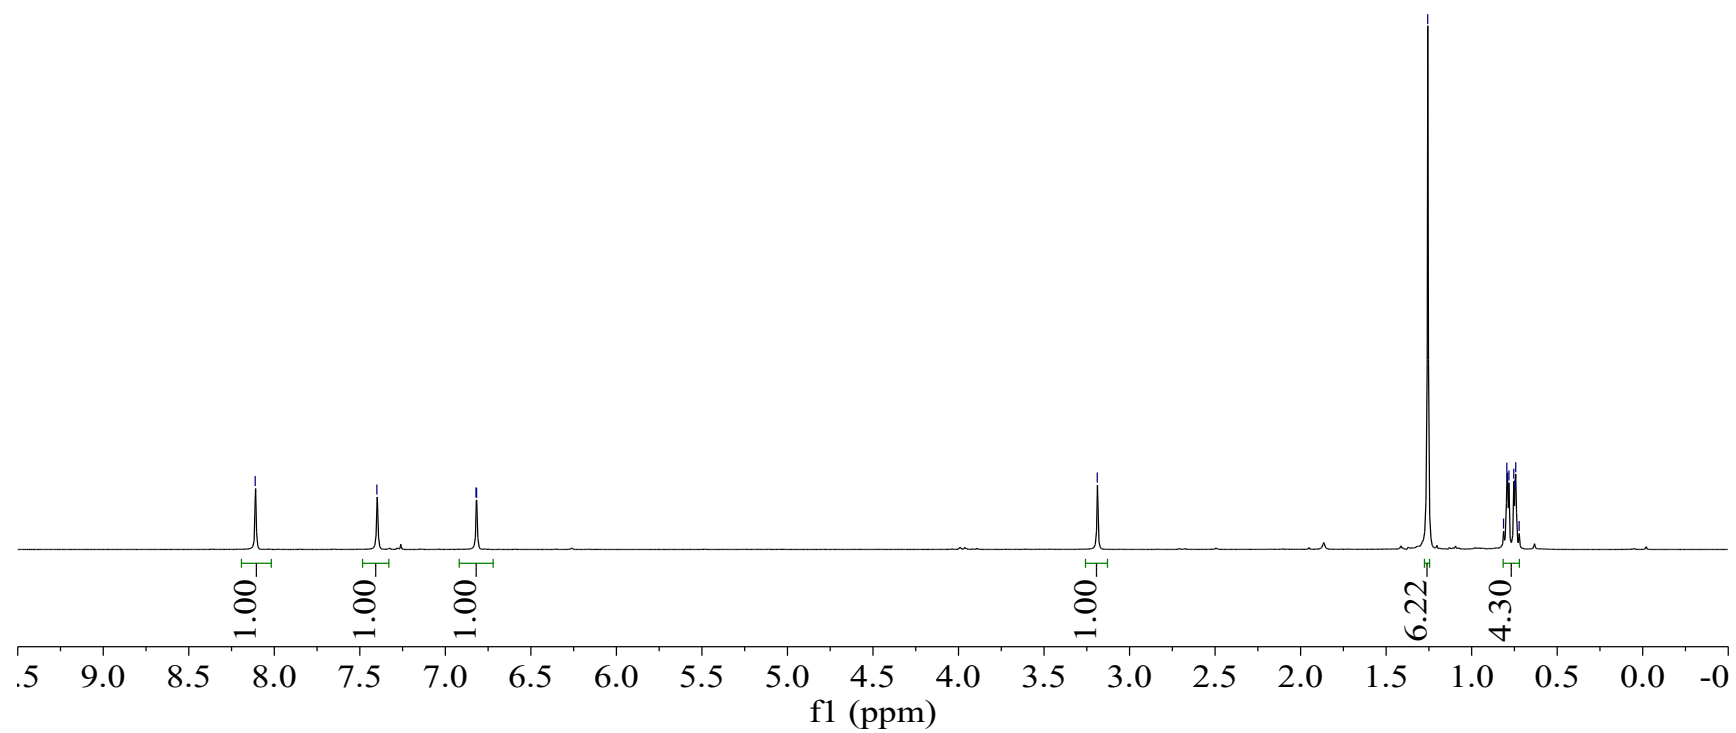

<sup>1</sup>H NMR spectrum of compound **19y**

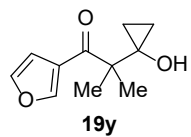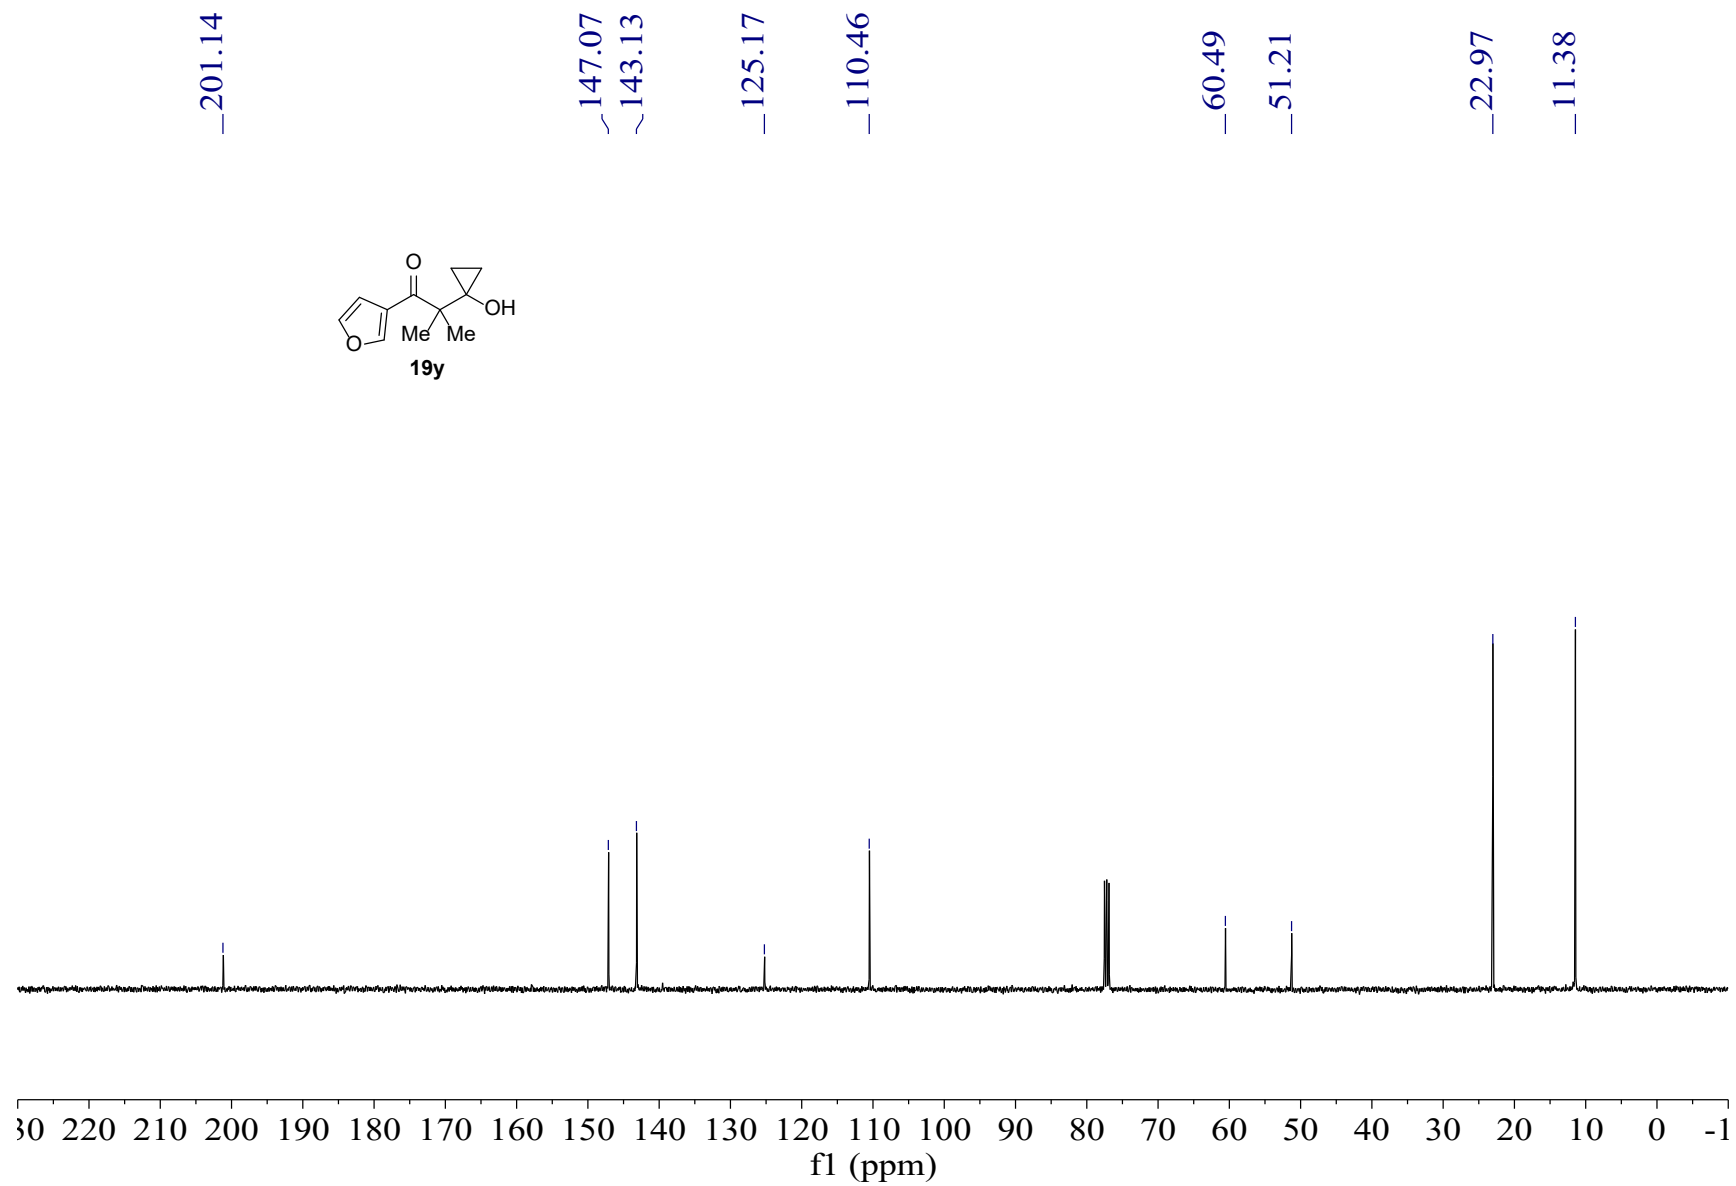

<sup>13</sup>C NMR spectrum of compound **19y**

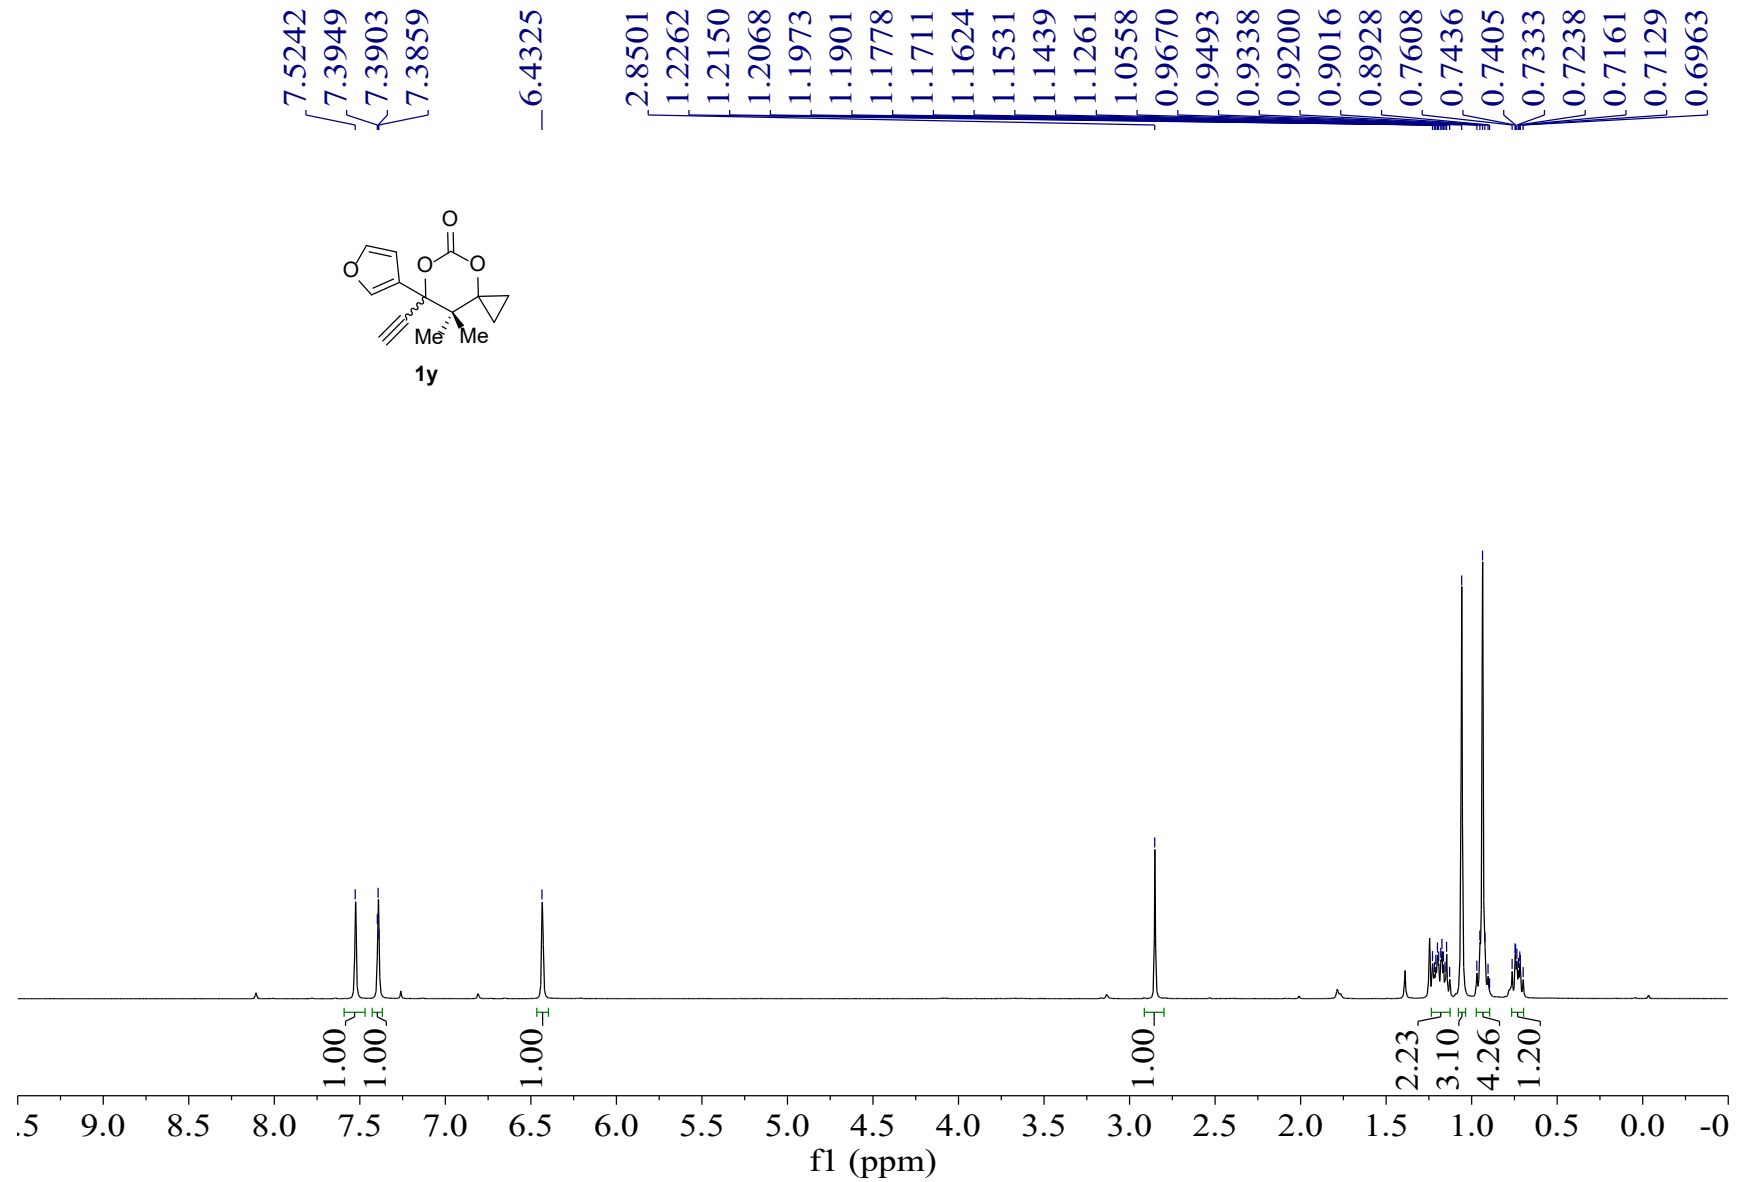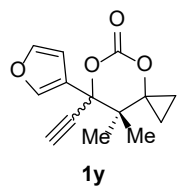

<sup>1</sup>H NMR spectrum of compound **1y**



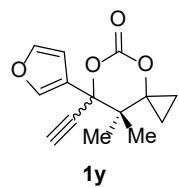

147.97  
143.12  
141.52

123.26

109.92

82.26  
80.18  
77.64

37.69

19.67  
19.53  
11.81  
7.60

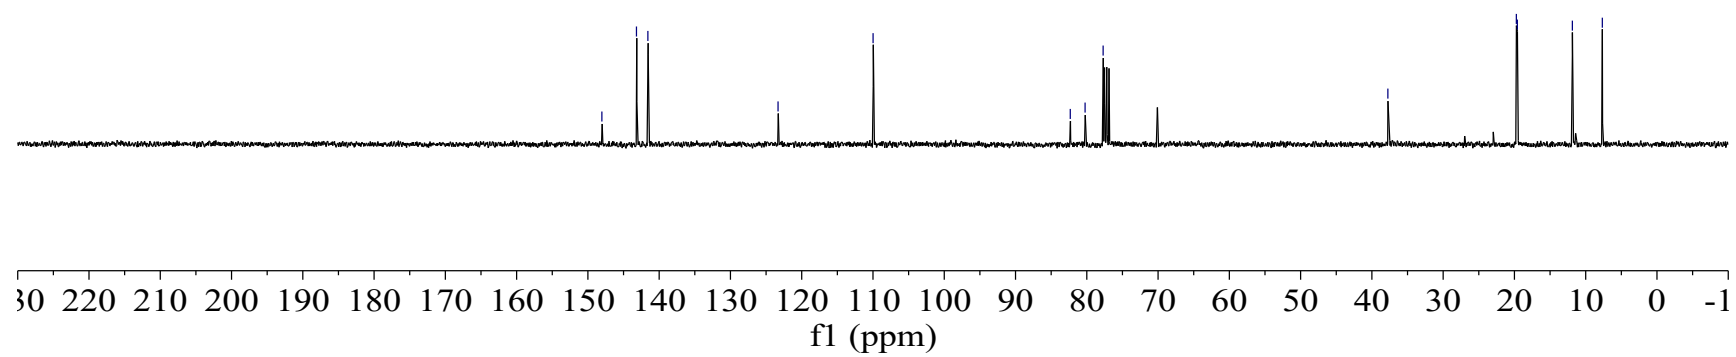

<sup>13</sup>C NMR spectrum of compound **1y**

S300

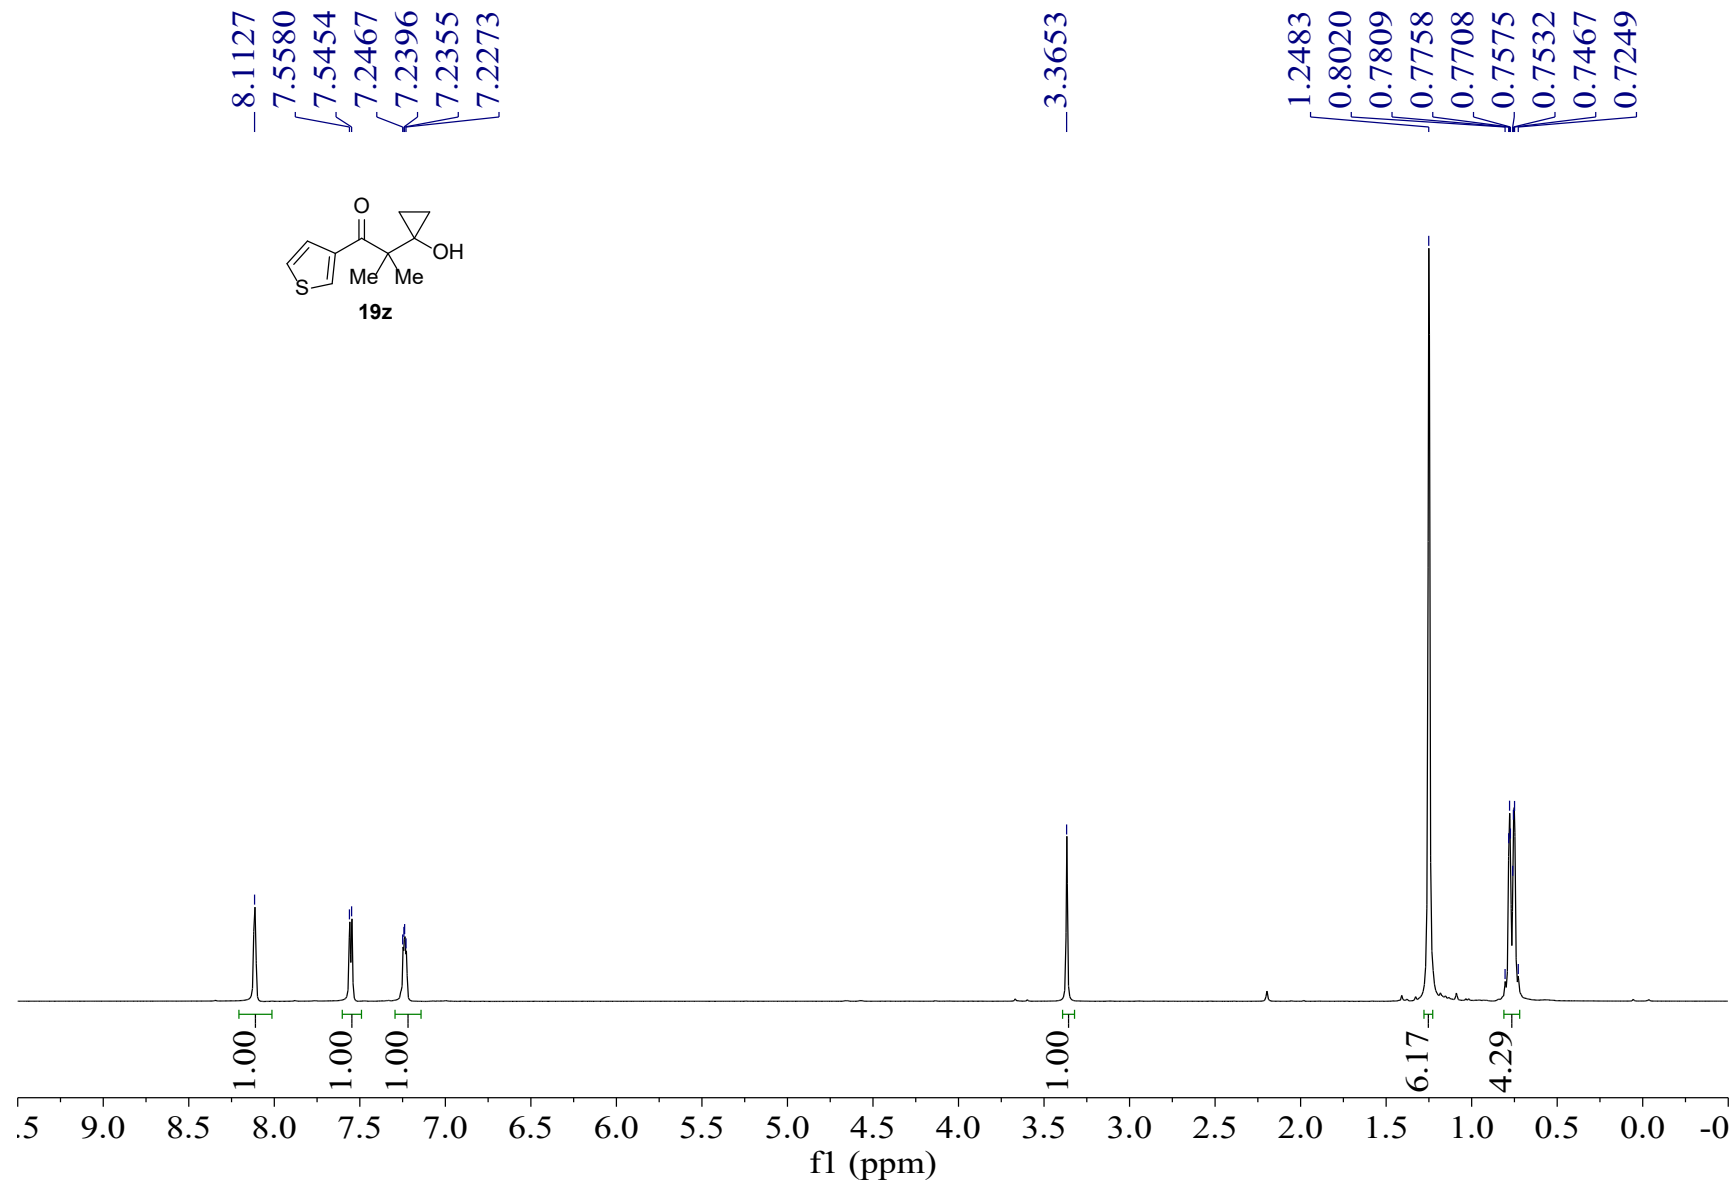

<sup>1</sup>H NMR spectrum of compound **19z**

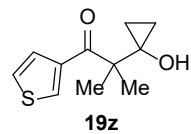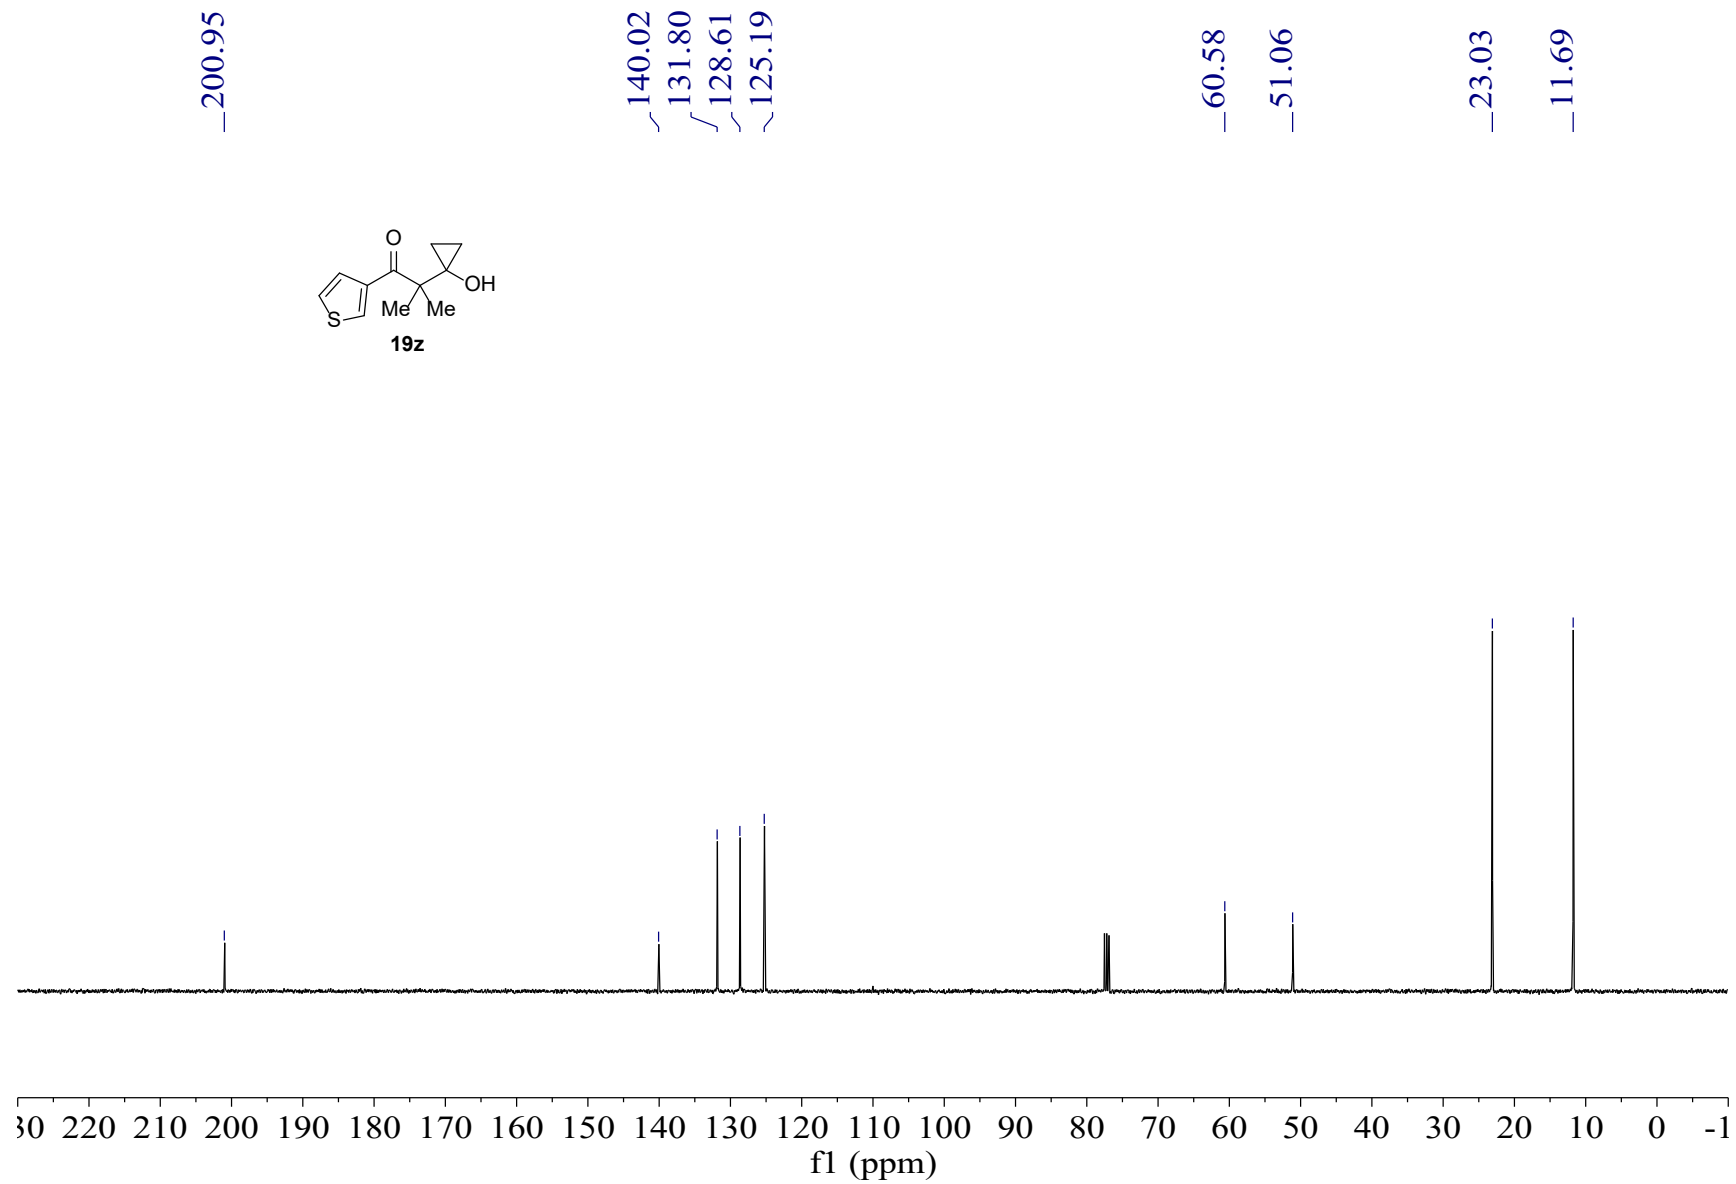

<sup>13</sup>C NMR spectrum of compound **19z**

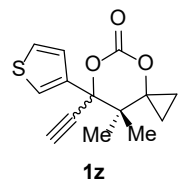

7.3982  
7.3937  
7.2958  
7.2879  
7.2833  
7.2756  
7.1269  
7.1145

2.8816  
1.2570  
1.2392  
1.2271  
1.2197  
1.2116  
1.1946  
1.1906  
1.1865  
1.1770  
1.1676  
1.1500  
0.9937  
0.9554  
0.9379  
0.9257  
0.9081  
0.8899  
0.7343  
0.7175  
0.7140  
0.7072  
0.6971  
0.6901  
0.6867  
0.6697

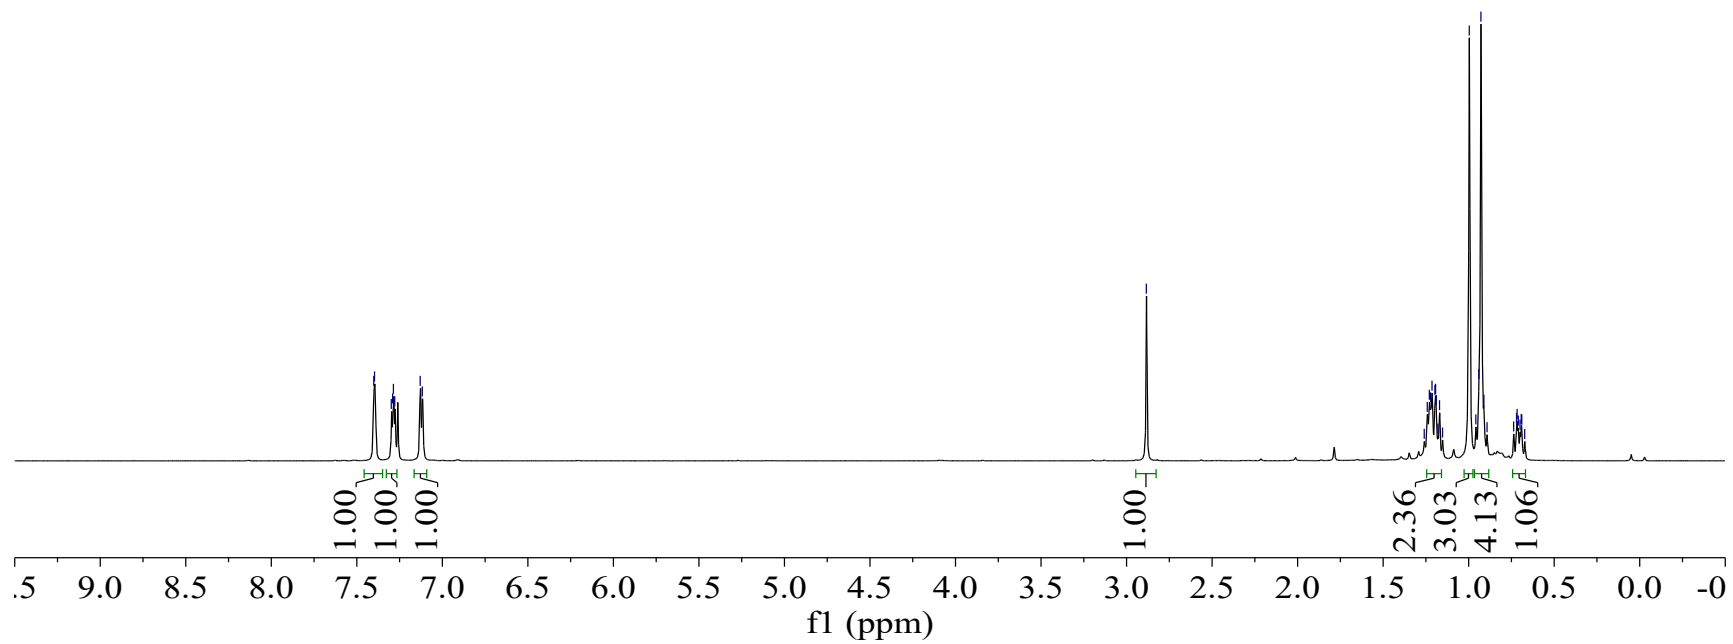

<sup>1</sup>H NMR spectrum of compound **1z**

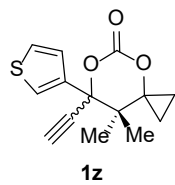

148.06  
137.51  
126.97  
125.40  
124.30

84.50  
80.65  
77.96  
70.04

38.00

19.76  
19.59  
11.87  
7.47

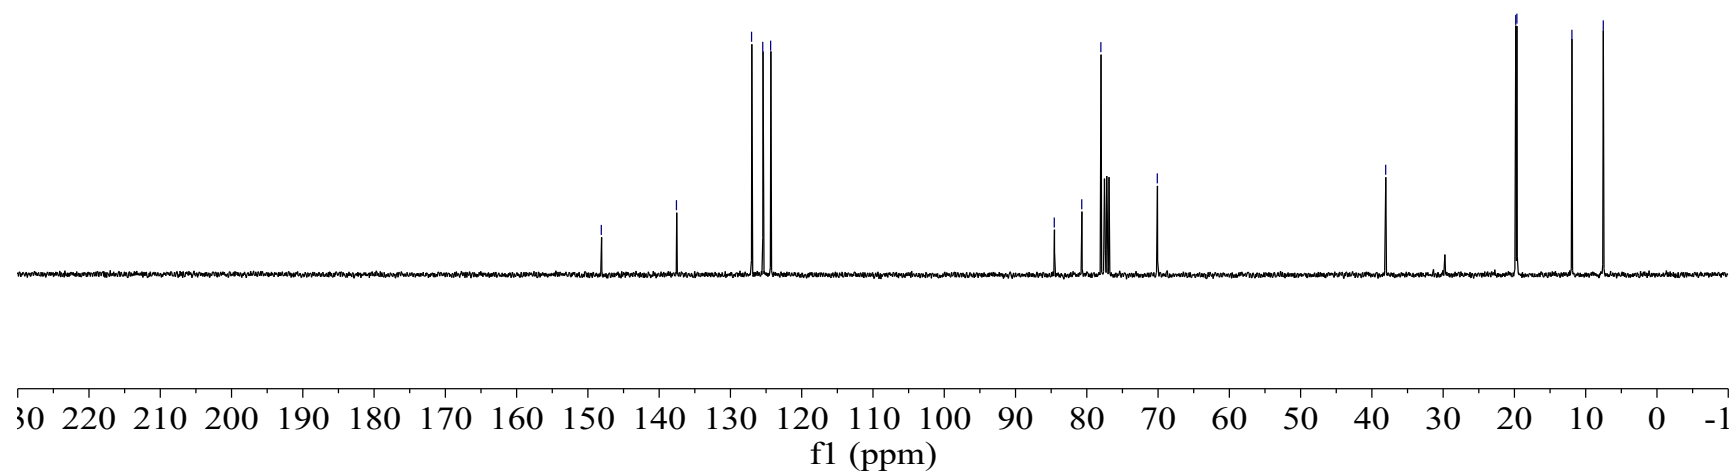

<sup>13</sup>C NMR spectrum of compound **1z**

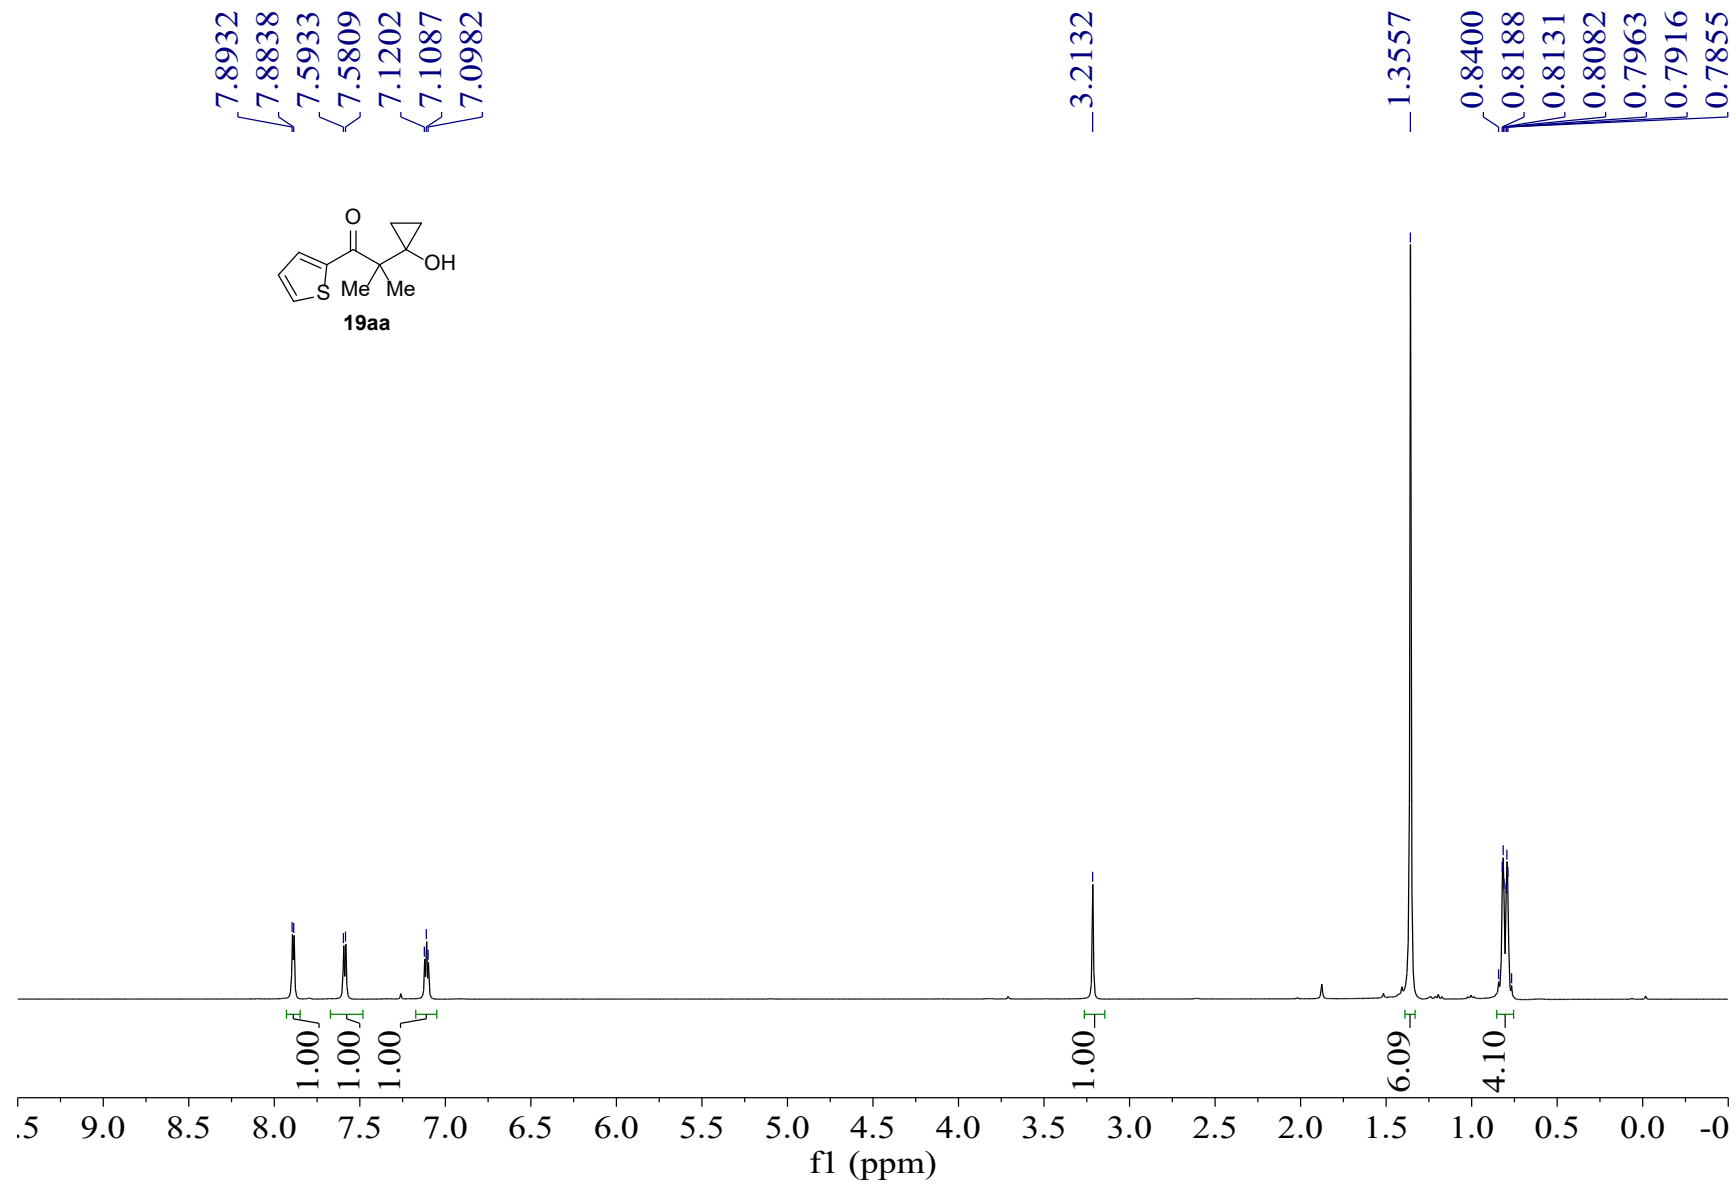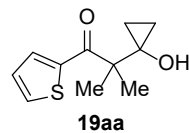

<sup>1</sup>H NMR spectrum of compound **19aa**

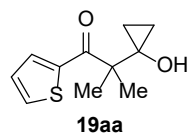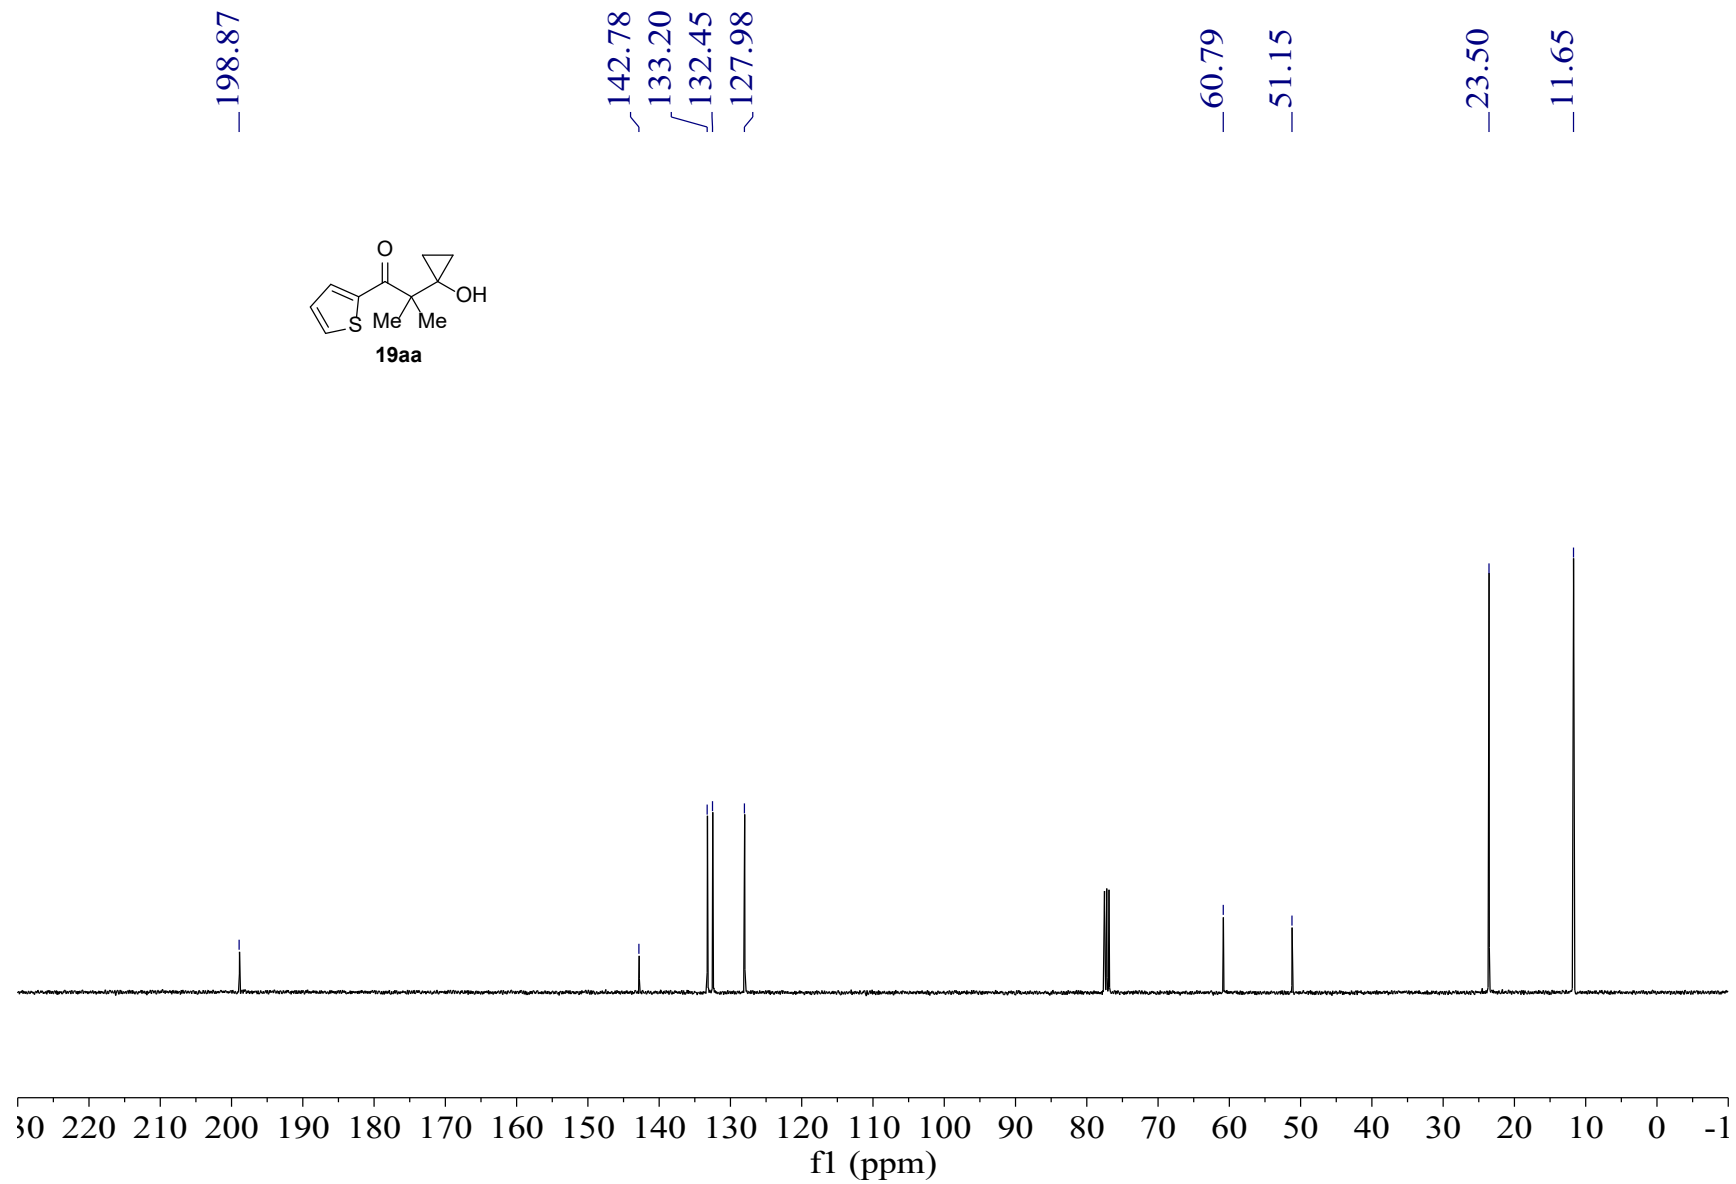

<sup>13</sup>C NMR spectrum of compound **19aa**

7.3480  
7.3396  
7.1942  
7.1884  
7.0189  
7.0124  
7.0046

2.9249  
1.2810  
1.2688  
1.2612  
1.2562  
1.2492  
1.2362  
1.2230  
1.2170  
1.2108  
1.2047  
1.1926  
1.0985  
1.0072  
0.9886  
0.9808  
0.9760  
0.9693  
0.9569  
0.7794  
0.7669  
0.7607  
0.7544  
0.7486  
0.7361

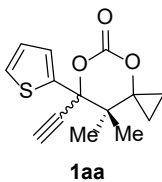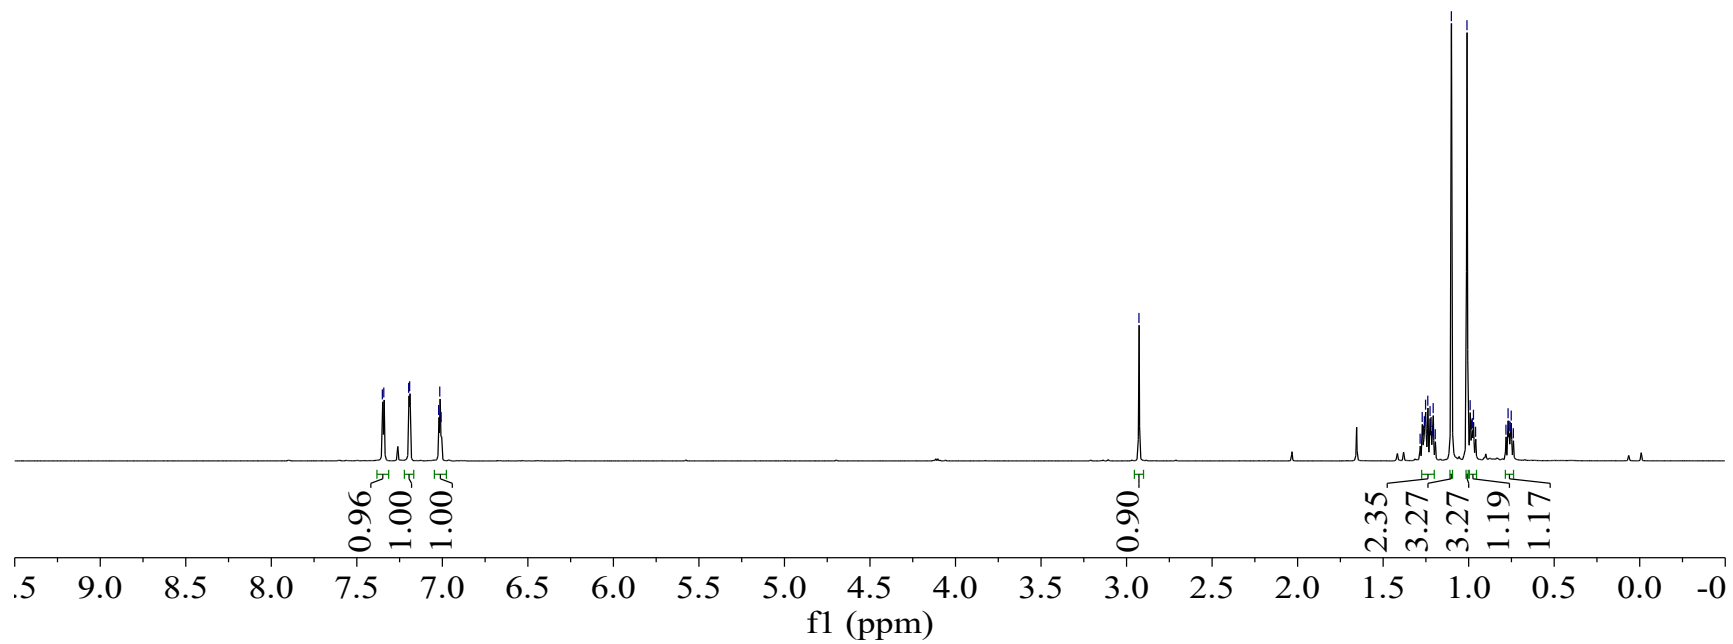

<sup>1</sup>H NMR spectrum of compound 1aa



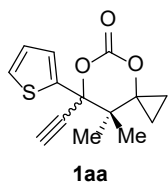

147.64  
139.47  
127.59  
126.54  
126.45

84.71  
80.66  
78.34  
70.21

38.45

19.91  
19.89  
12.08  
7.79

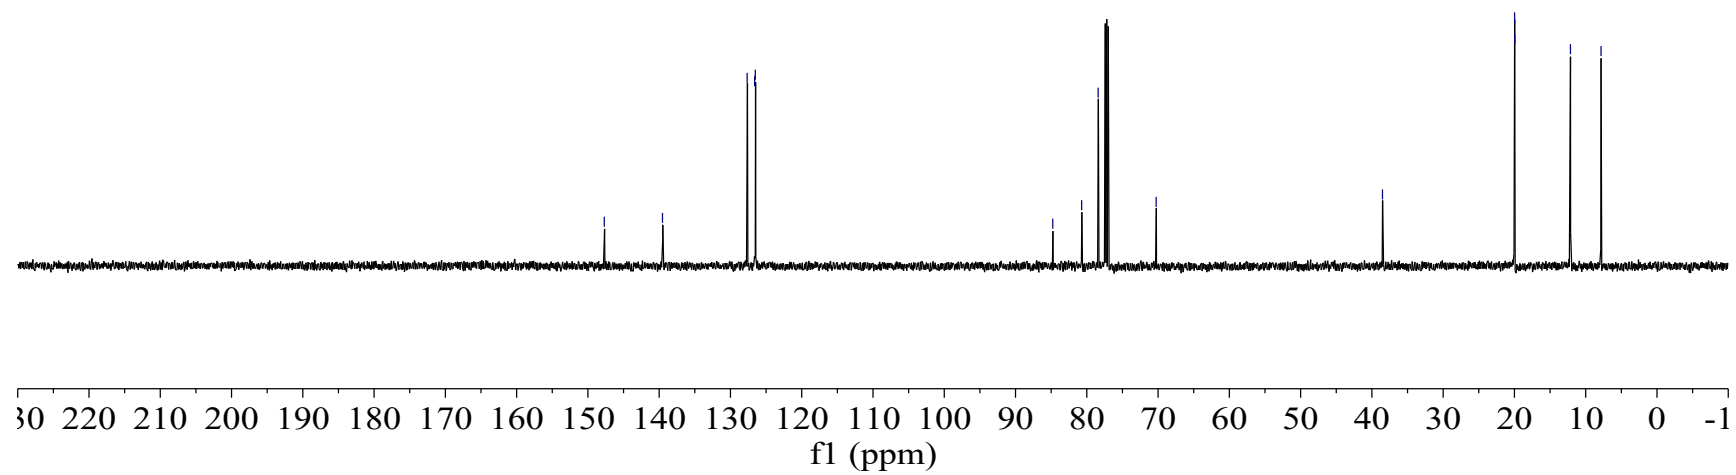

<sup>13</sup>C NMR spectrum of compound **1aa**

8.4394  
8.3158  
8.2969  
7.9437  
7.9242  
7.8173  
7.7967  
7.3785  
7.3607  
7.3400  
7.3223  
7.3048  
7.2705  
7.2503

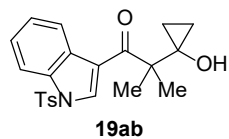

3.0224  
2.3487  
1.3641  
0.9108  
0.8892  
0.8838  
0.8793  
0.8703  
0.8657  
0.8601  
0.8382  
0.8304

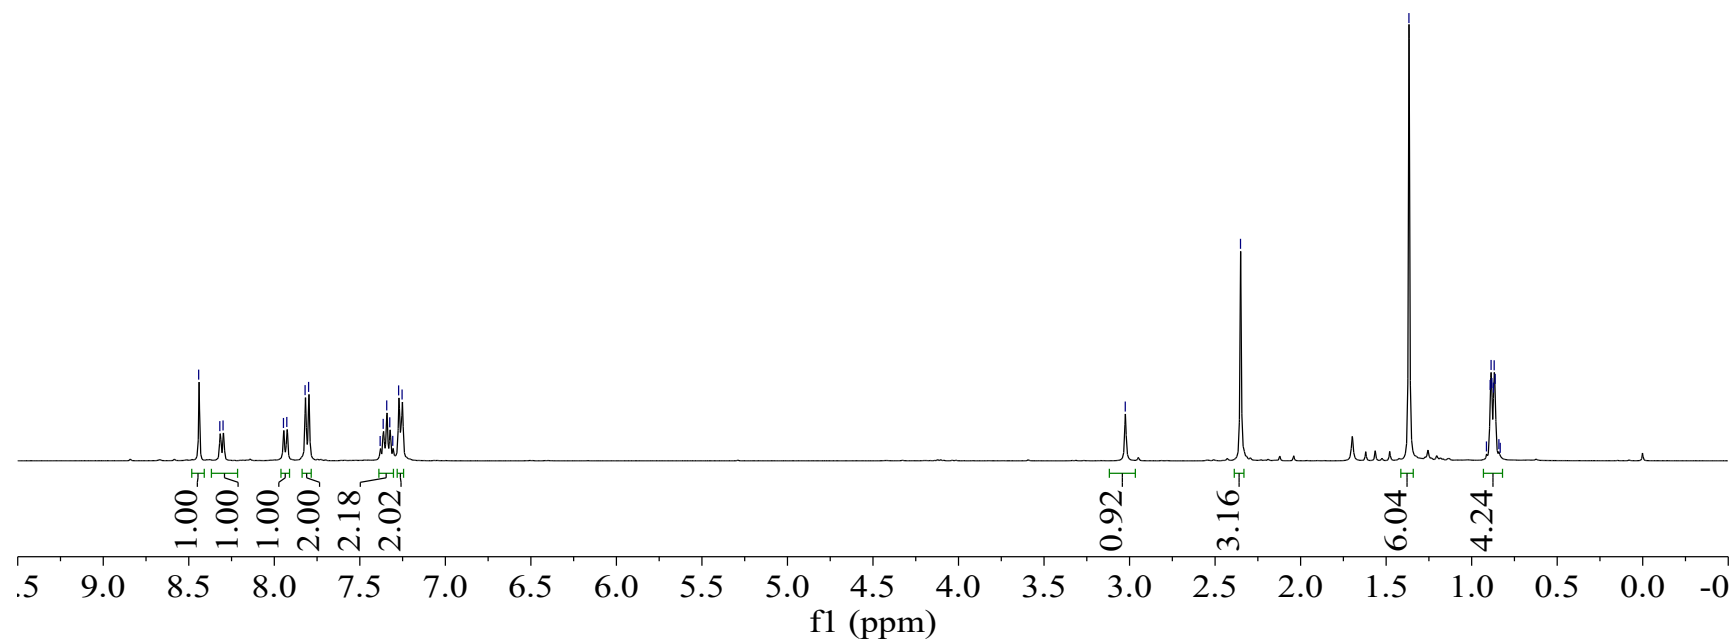

<sup>1</sup>H NMR spectrum of compound **19ab**

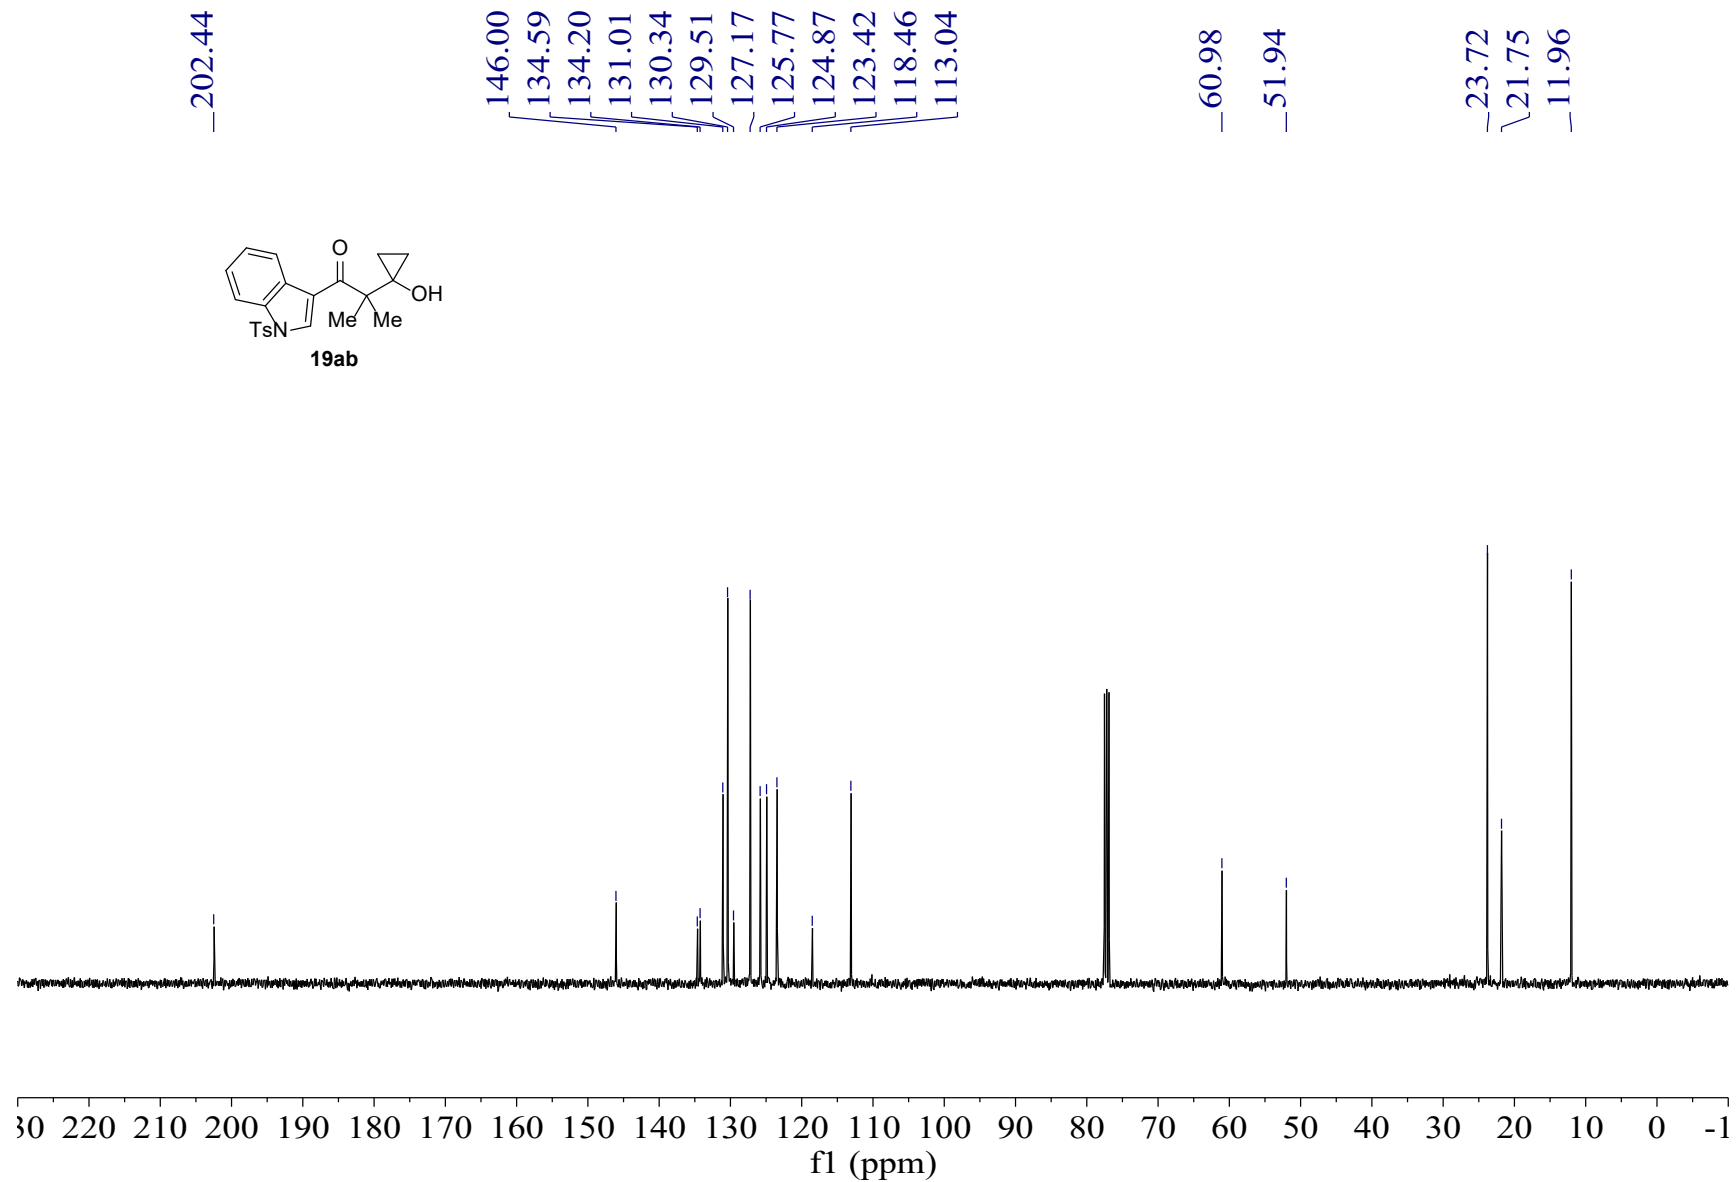

$^{13}\text{C}$  NMR spectrum of compound **19ab**

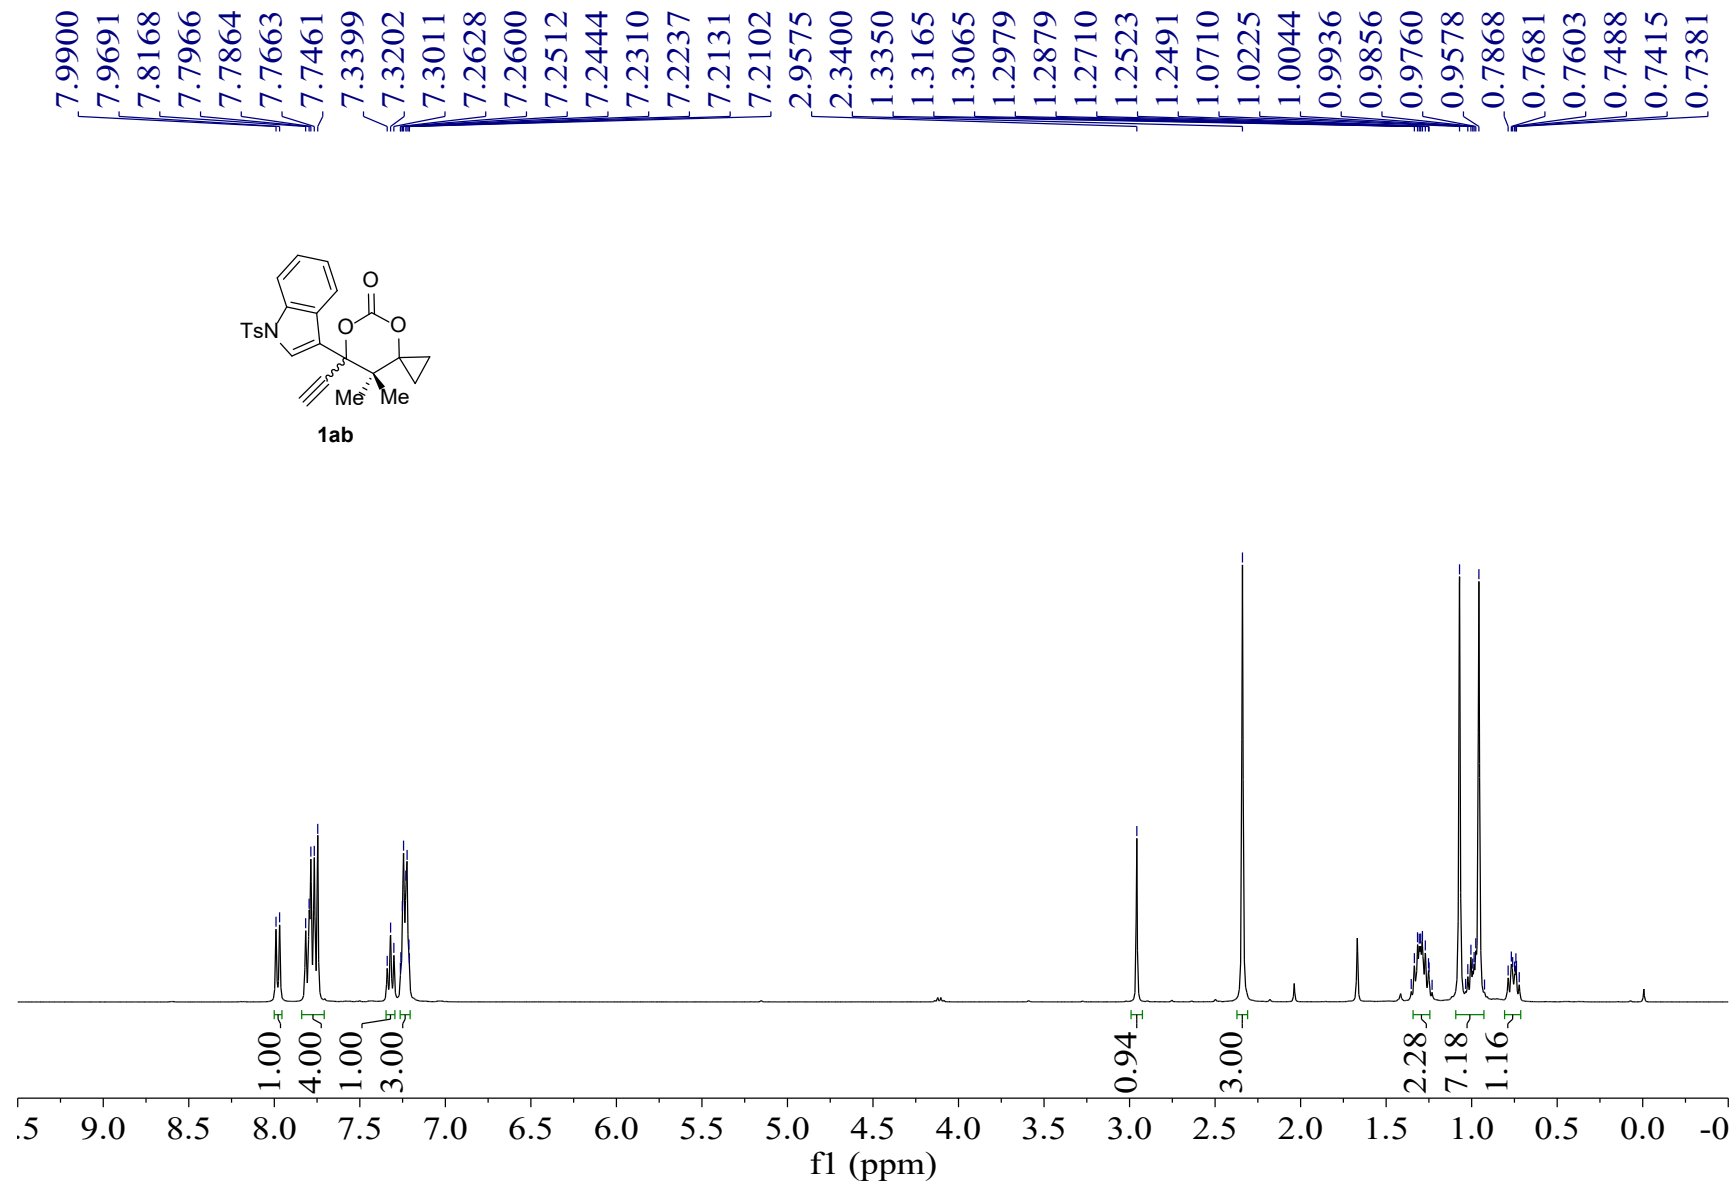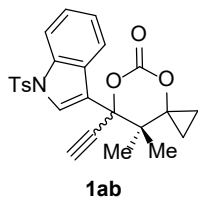

<sup>1</sup>H NMR spectrum of compound **1ab**

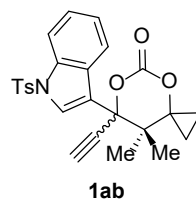

147.99  
145.60  
135.01  
134.74  
130.17  
127.96  
127.07  
126.27  
124.99  
123.59  
122.28  
118.42  
113.64  
83.64  
80.13  
78.80  
70.18  
39.00  
21.71  
20.27  
19.97  
12.36  
7.29

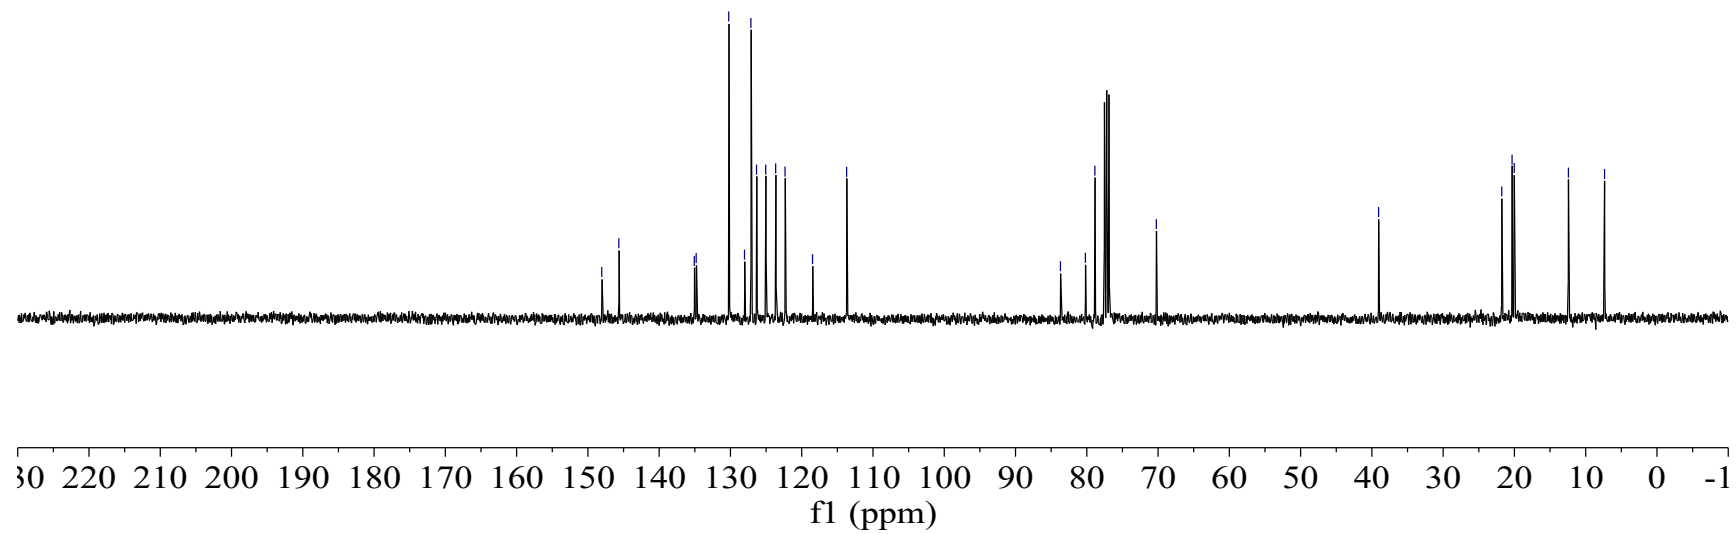

<sup>13</sup>C NMR spectrum of compound **1ab**

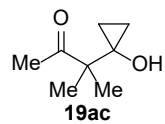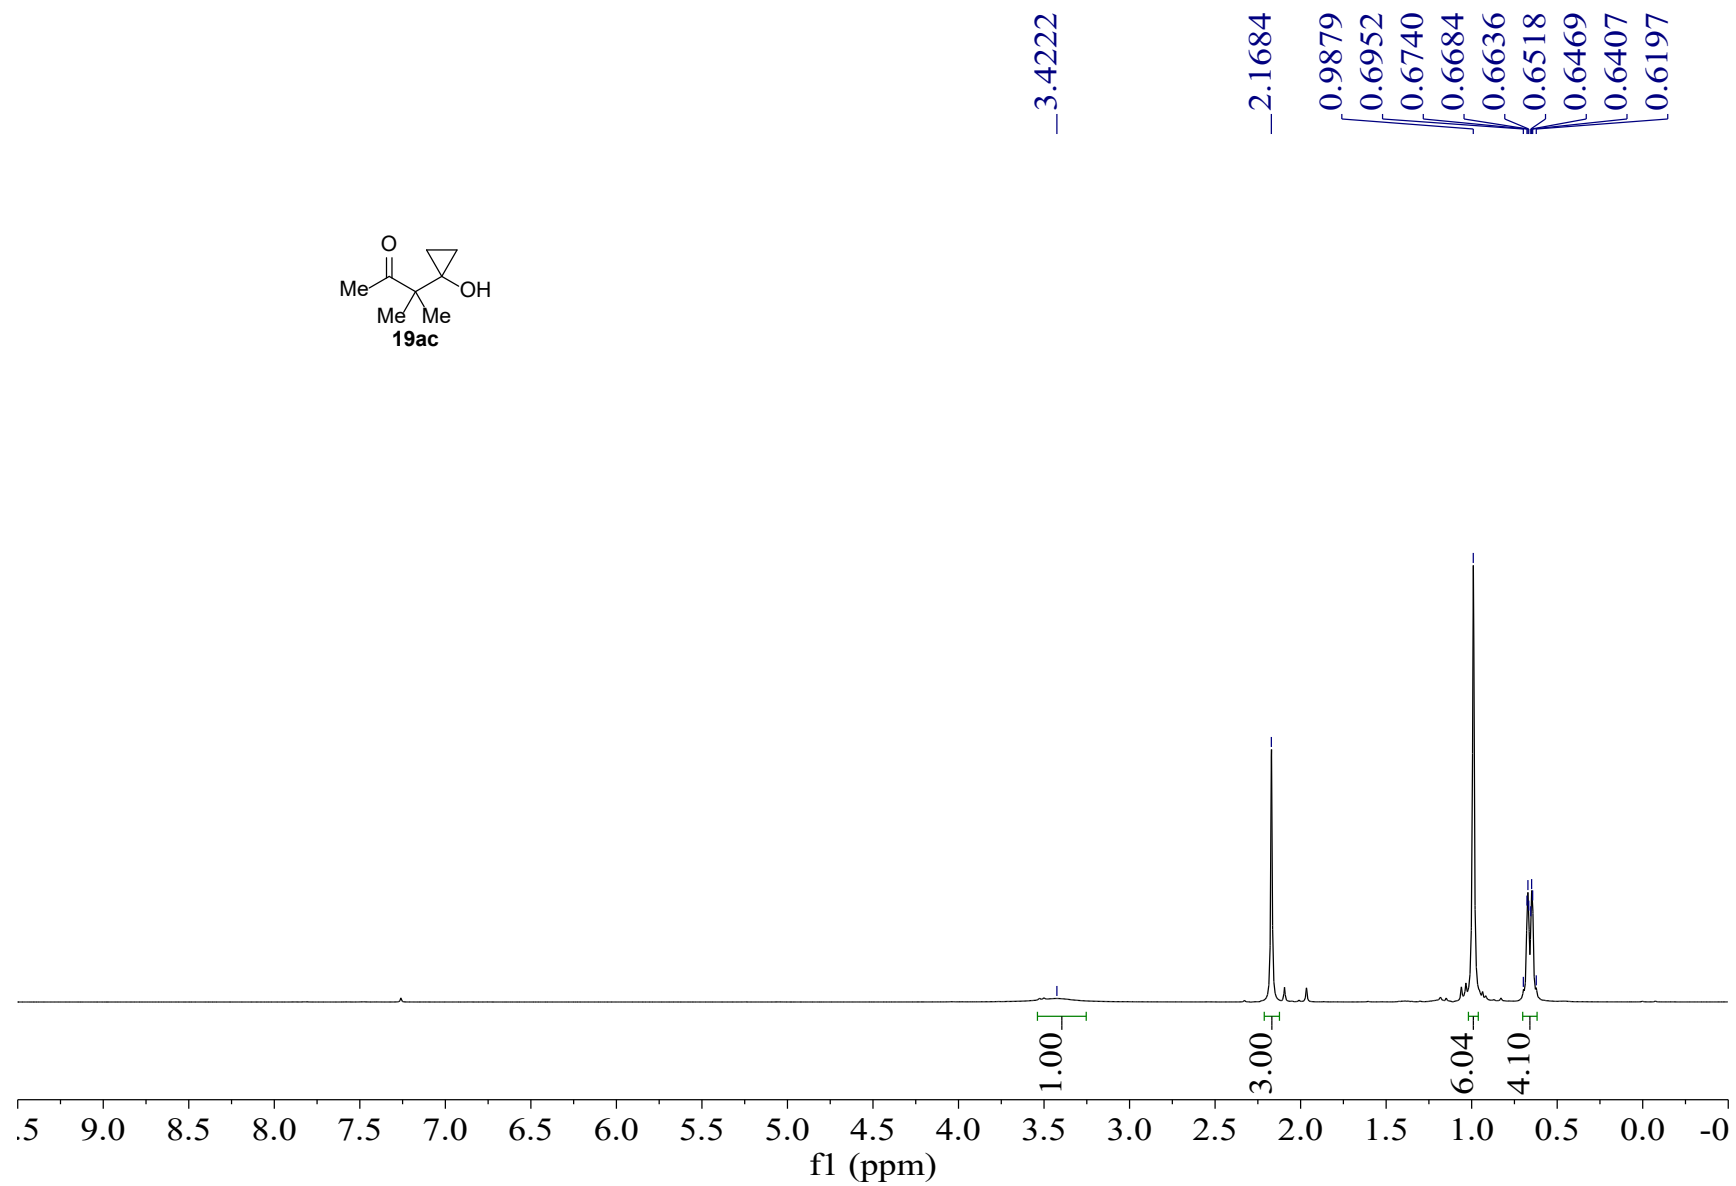

<sup>1</sup>H NMR spectrum of compound **19ac**

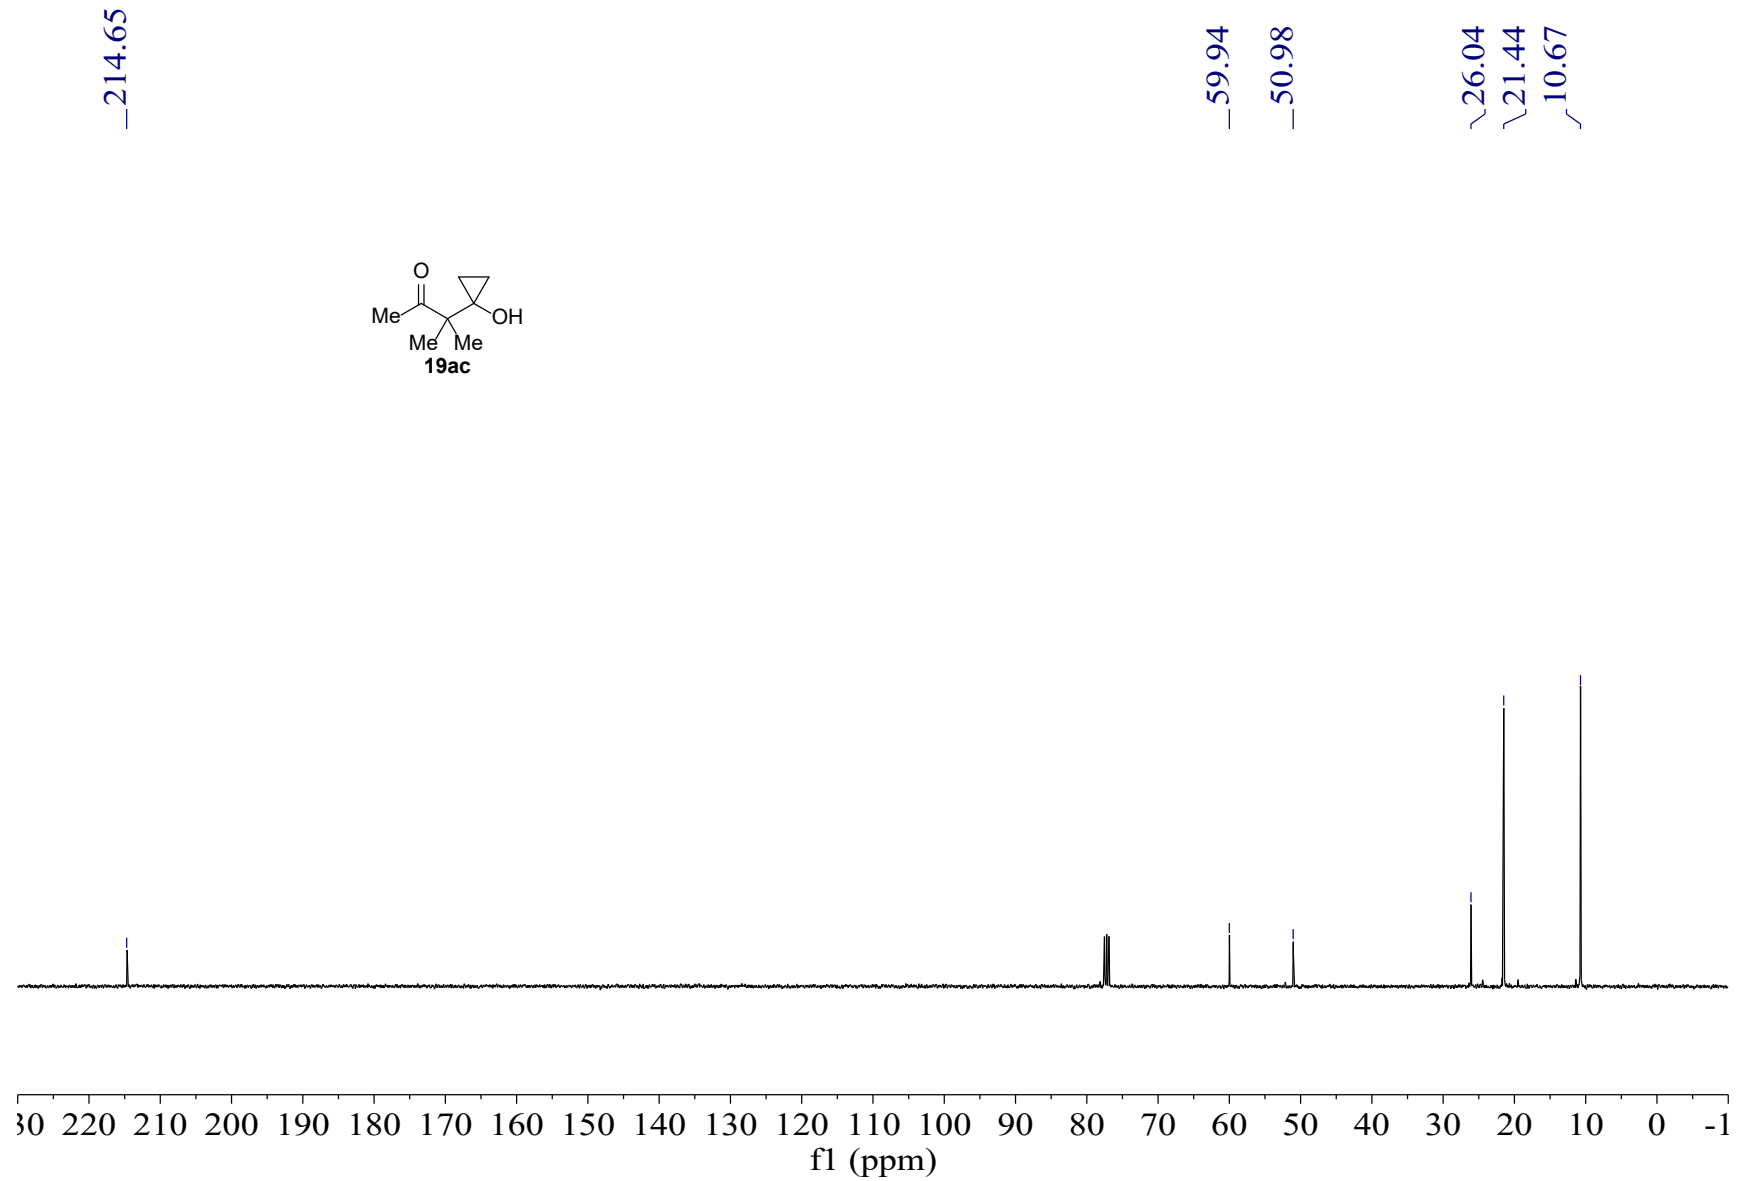

$^{13}\text{C}$  NMR spectrum of compound **19ac**

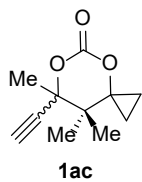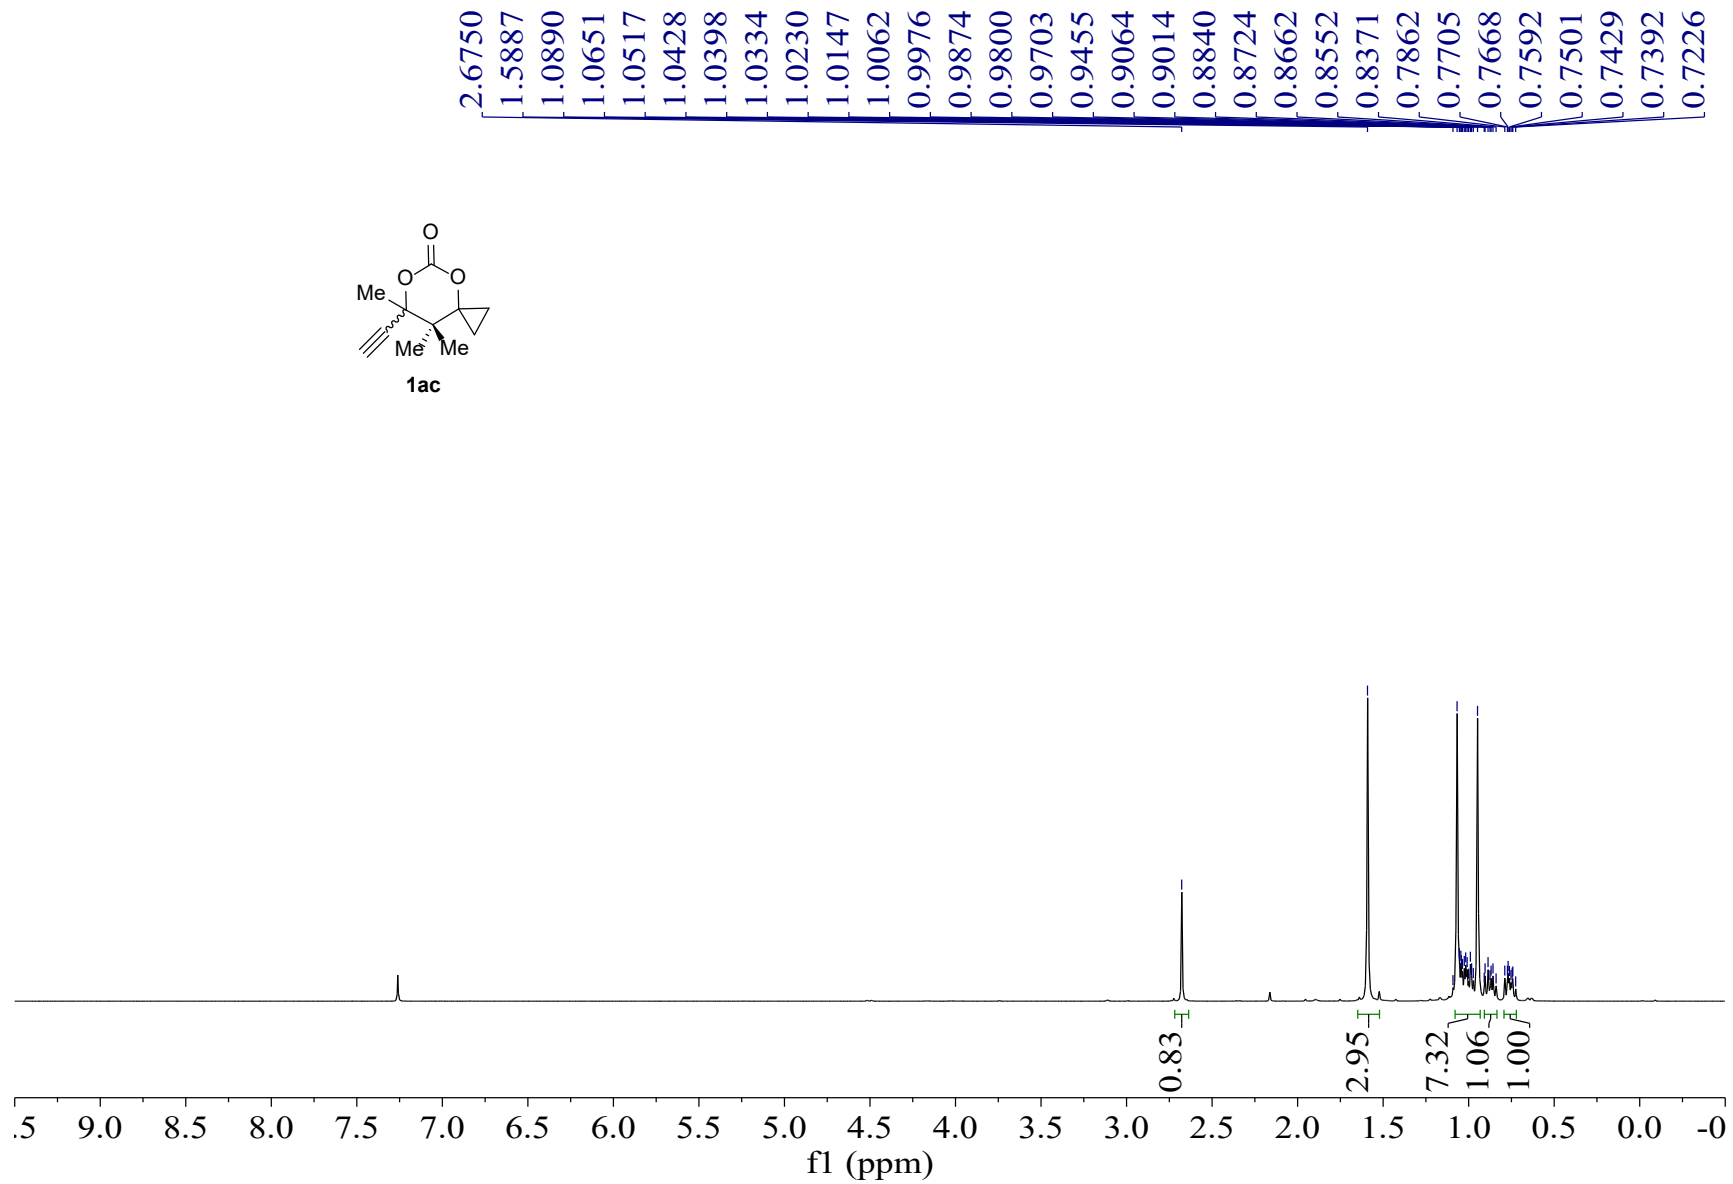

<sup>1</sup>H NMR spectrum of compound **1ac**



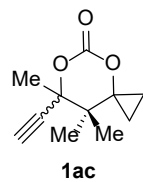

147.99

82.53  
81.15  
76.51  
69.74

36.21  
23.64  
19.78  
19.00  
10.93  
7.57

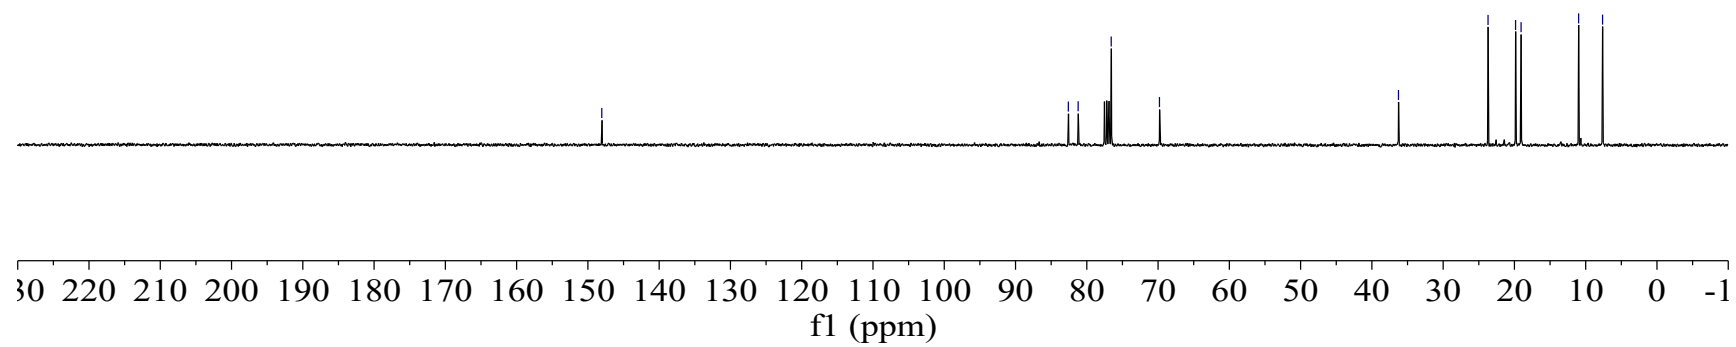

<sup>13</sup>C NMR spectrum of compound **1ac**

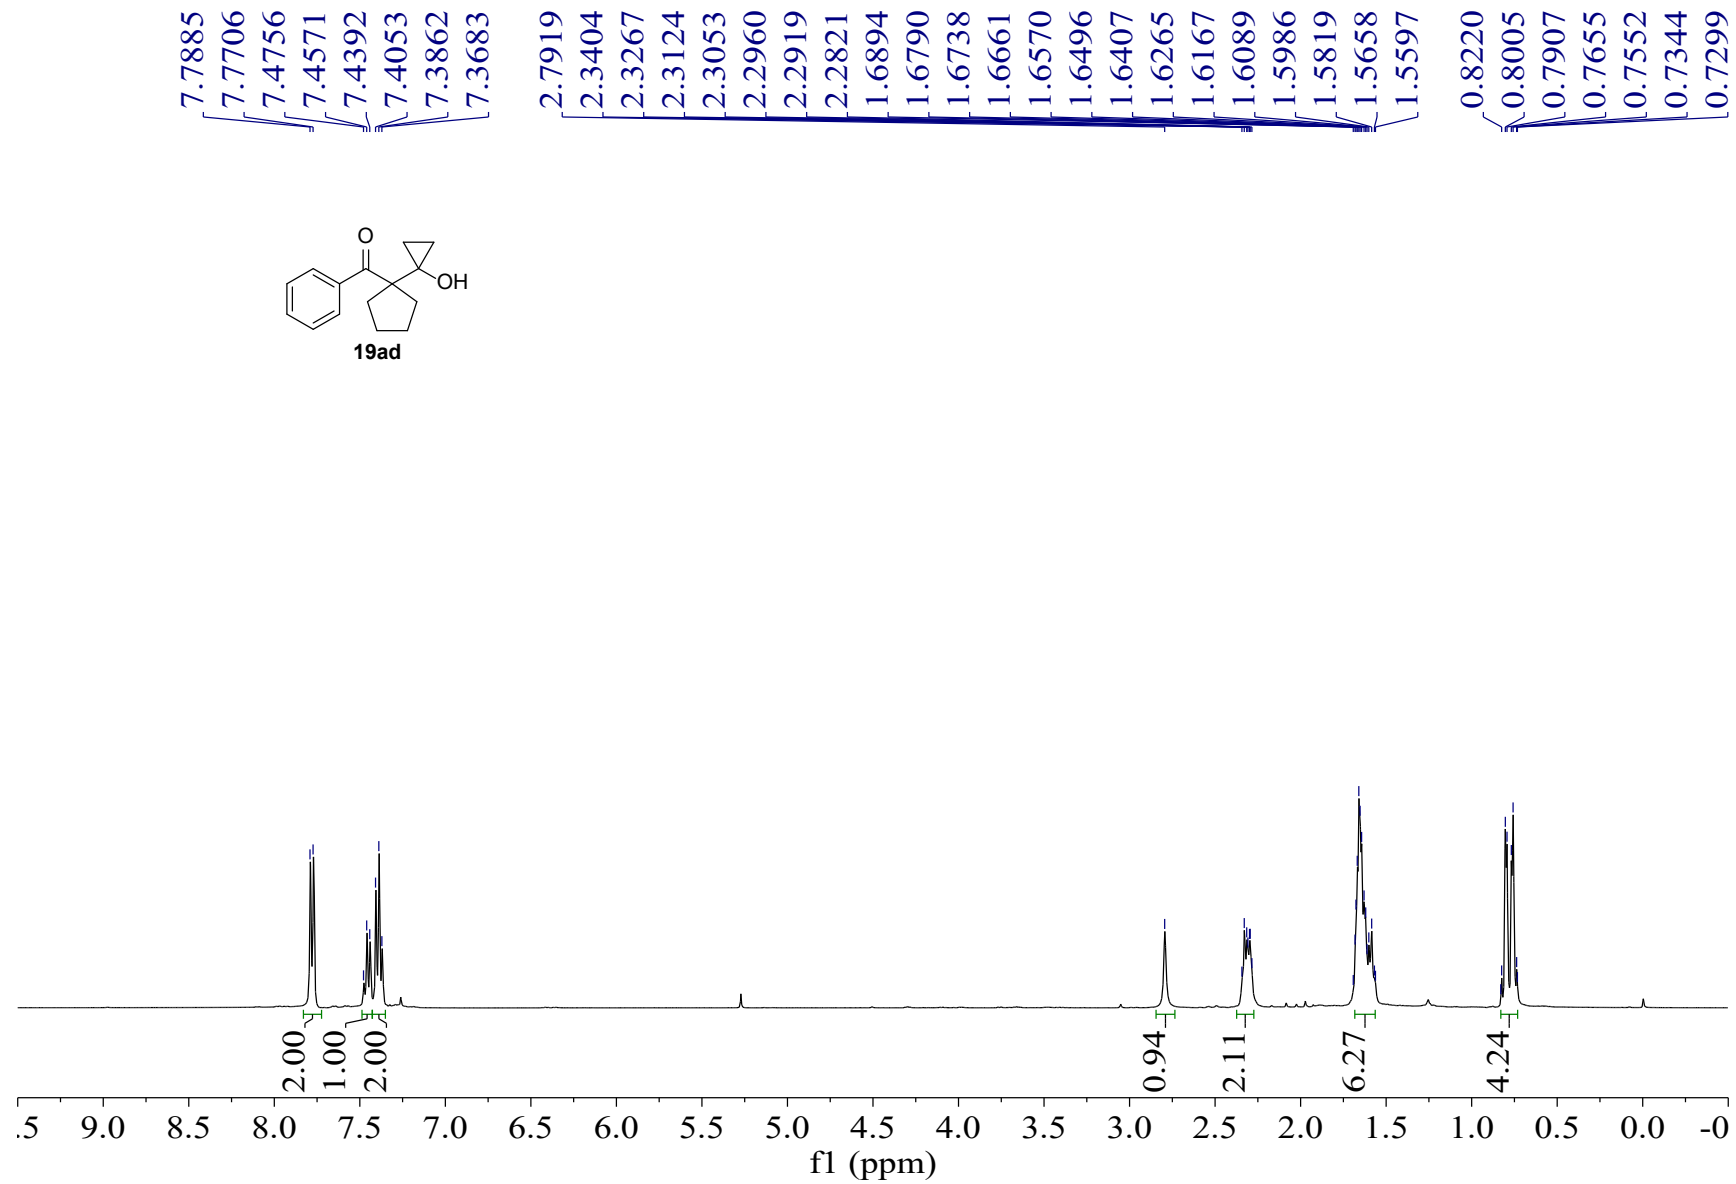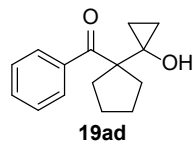

<sup>1</sup>H NMR spectrum of compound **19ad**

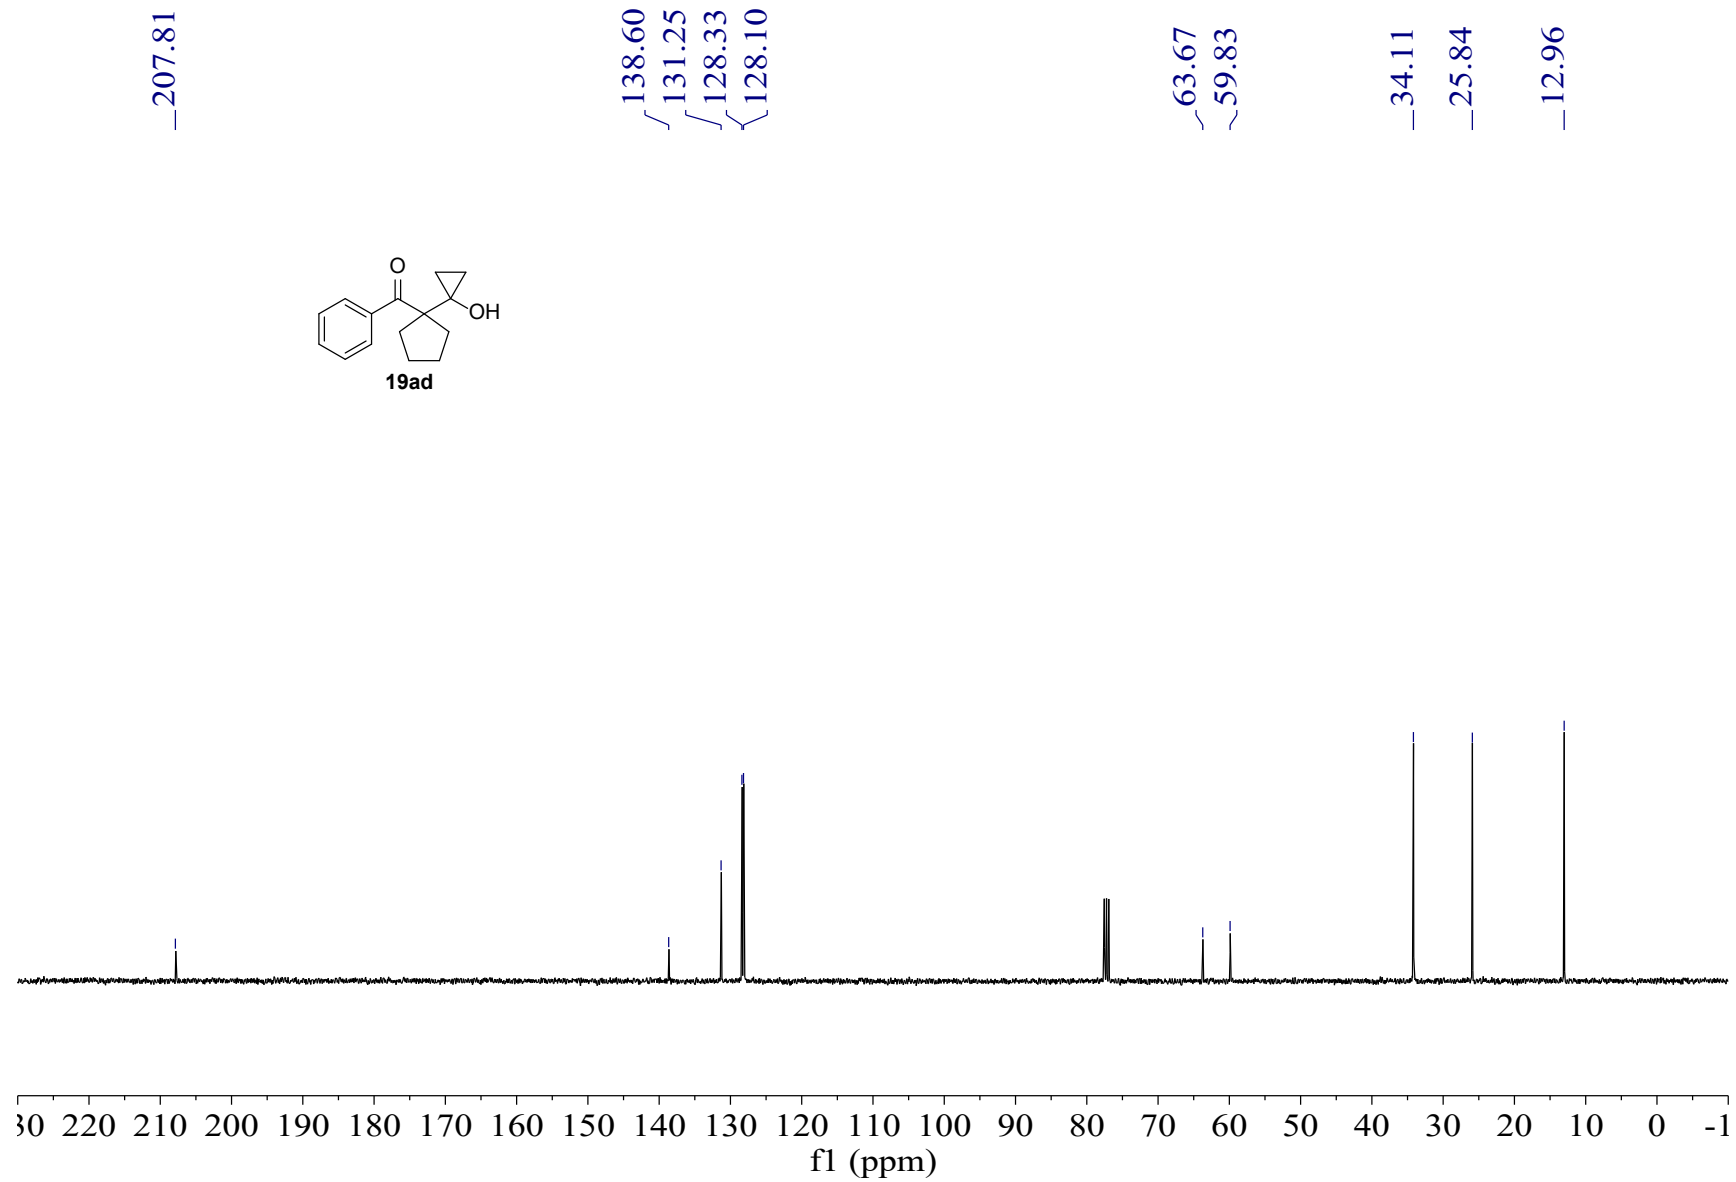

<sup>13</sup>C NMR spectrum of compound **19ad**

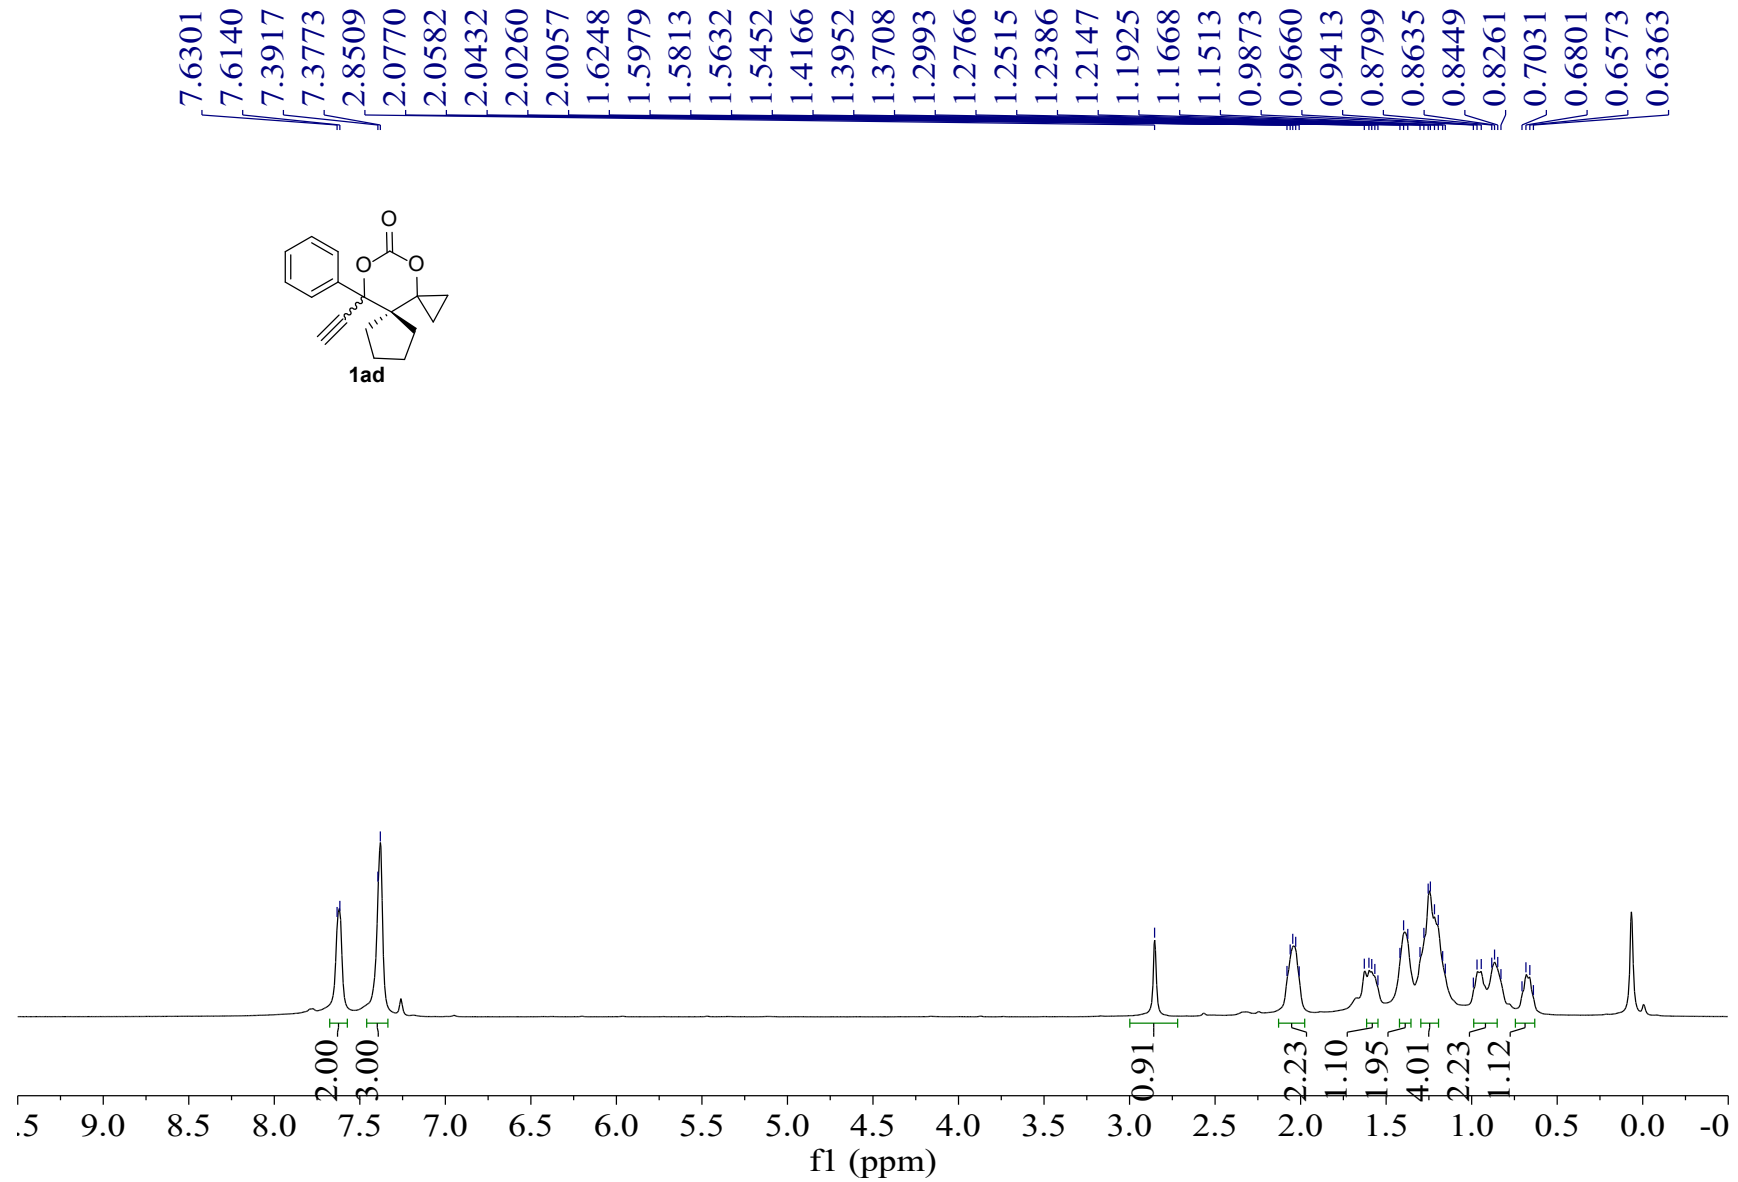

**<sup>1</sup>H NMR spectrum of compound 1ad**

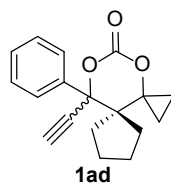

148.86  
136.89  
128.96  
128.03  
127.43

86.54  
81.88  
77.63  
69.79

50.04

31.94  
30.97  
26.47  
26.27  
12.22  
8.13

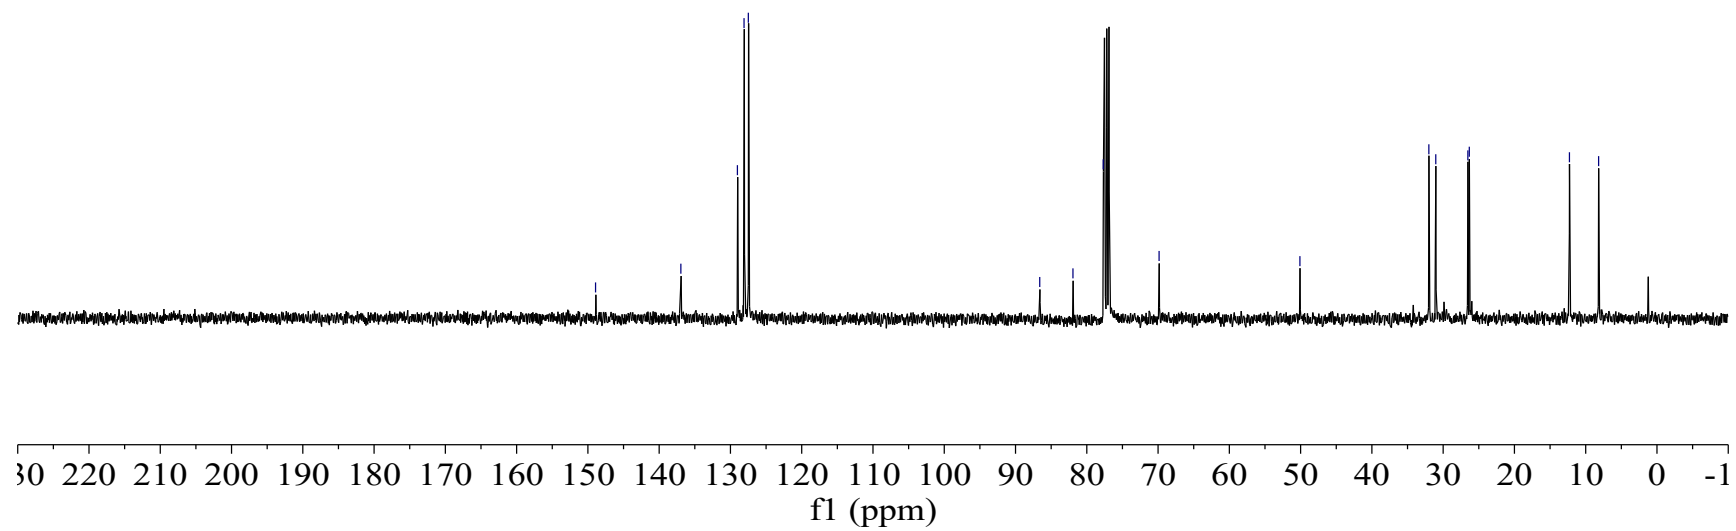

<sup>13</sup>C NMR spectrum of compound **1ad**

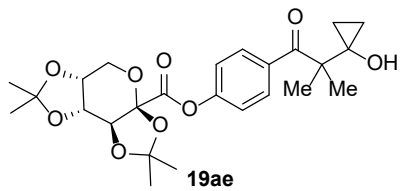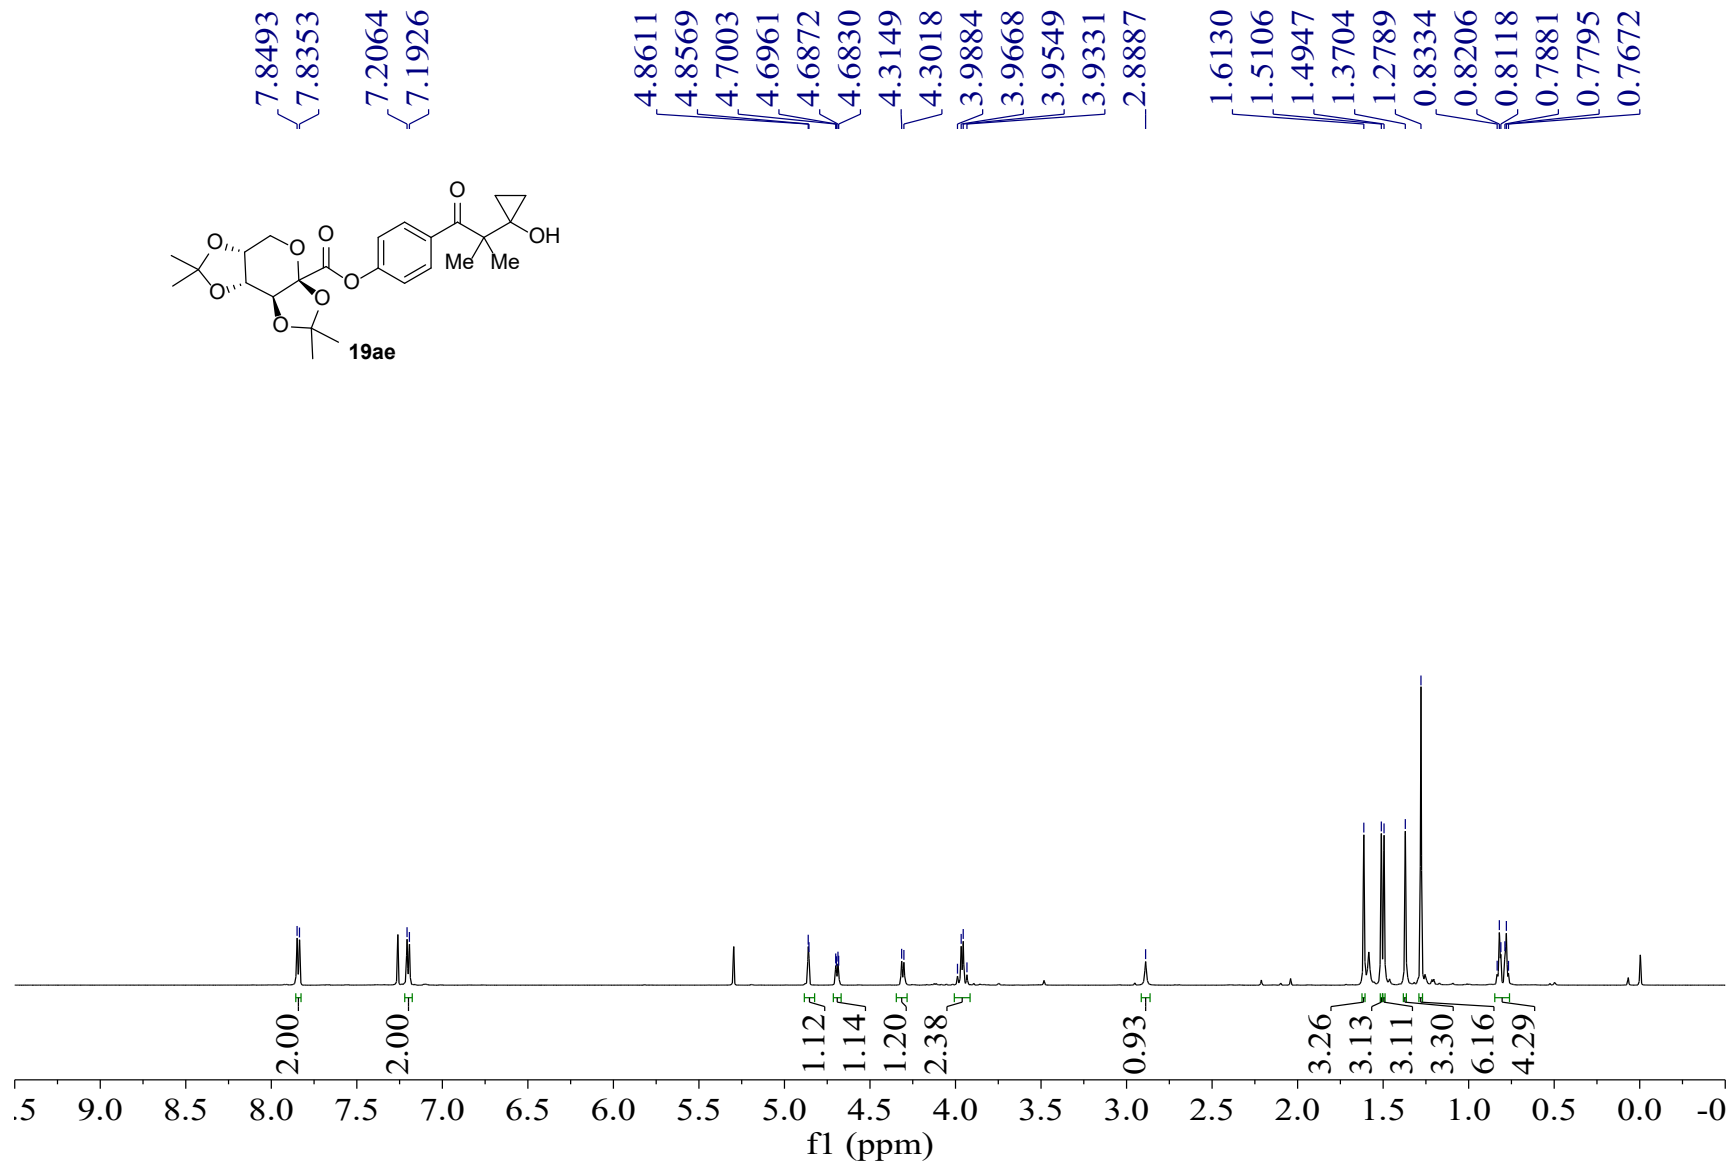

<sup>1</sup>H NMR spectrum of compound **19ae**

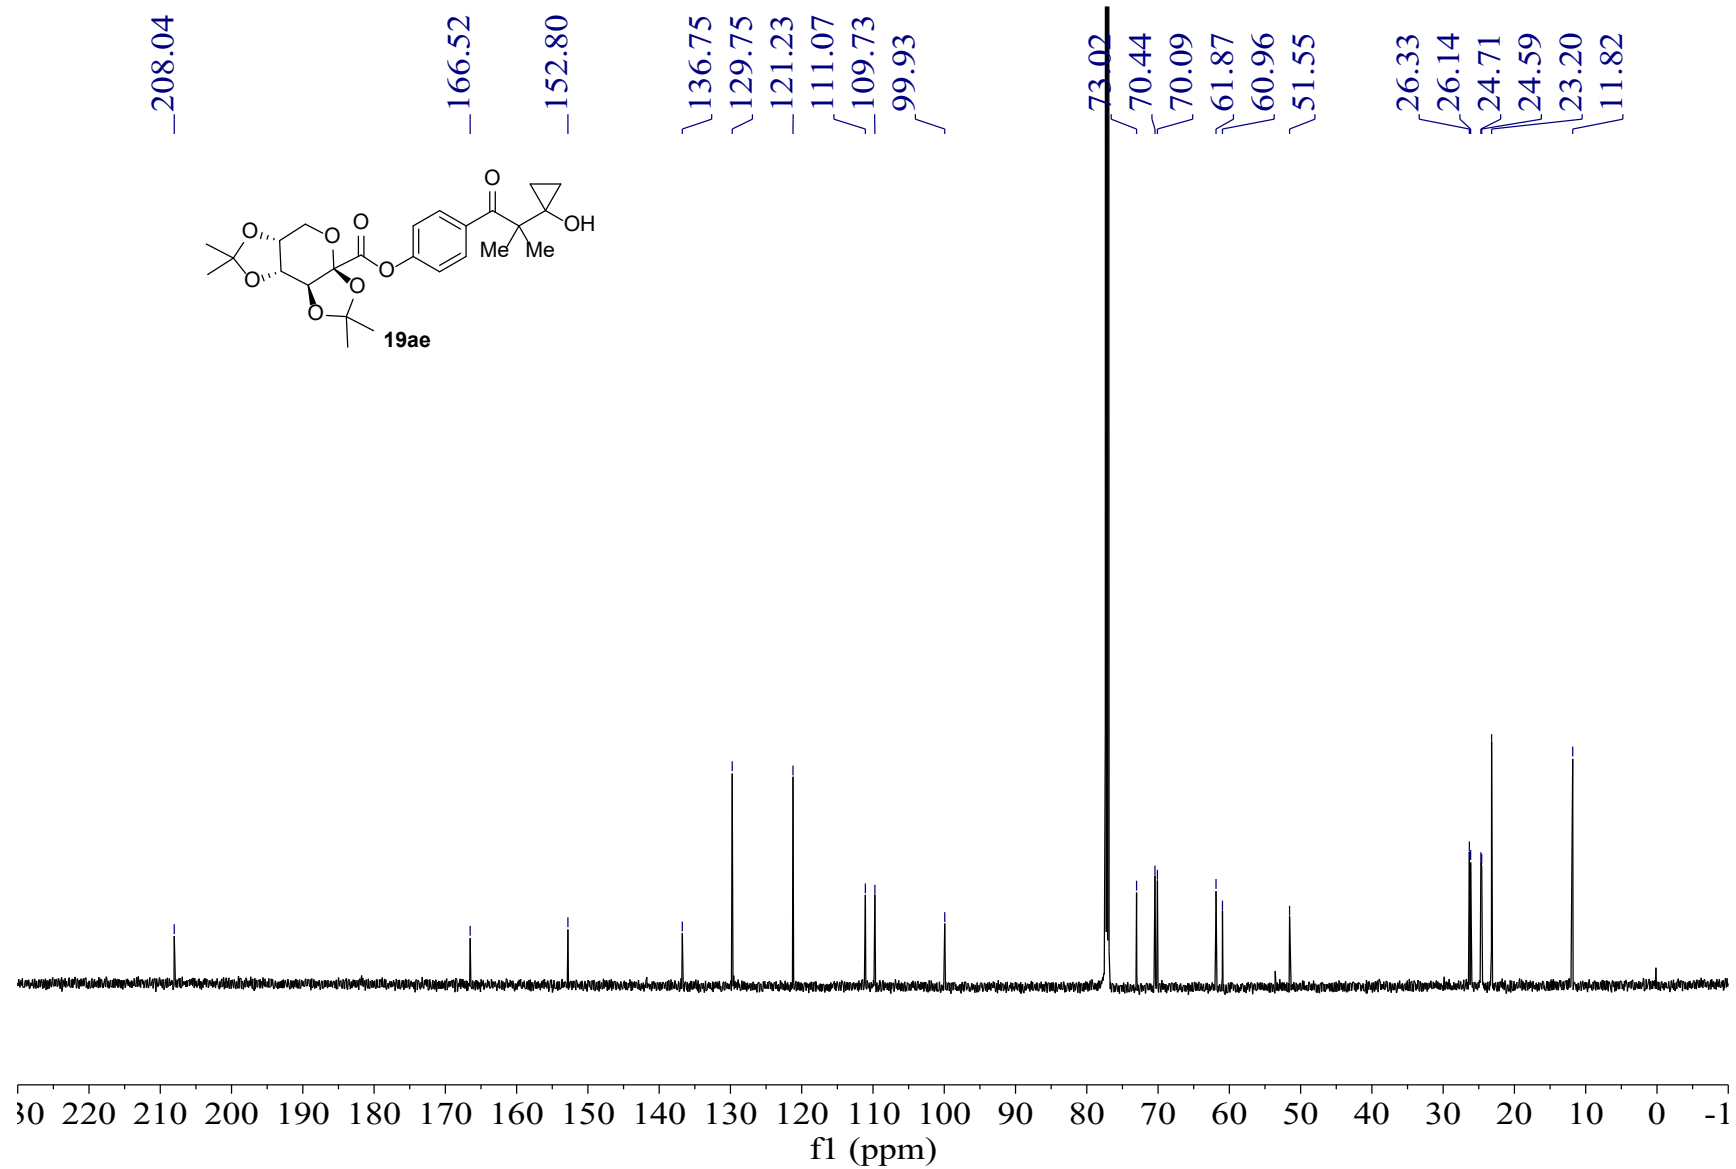

$^{13}\text{C}$  NMR spectrum of compound **19ae**

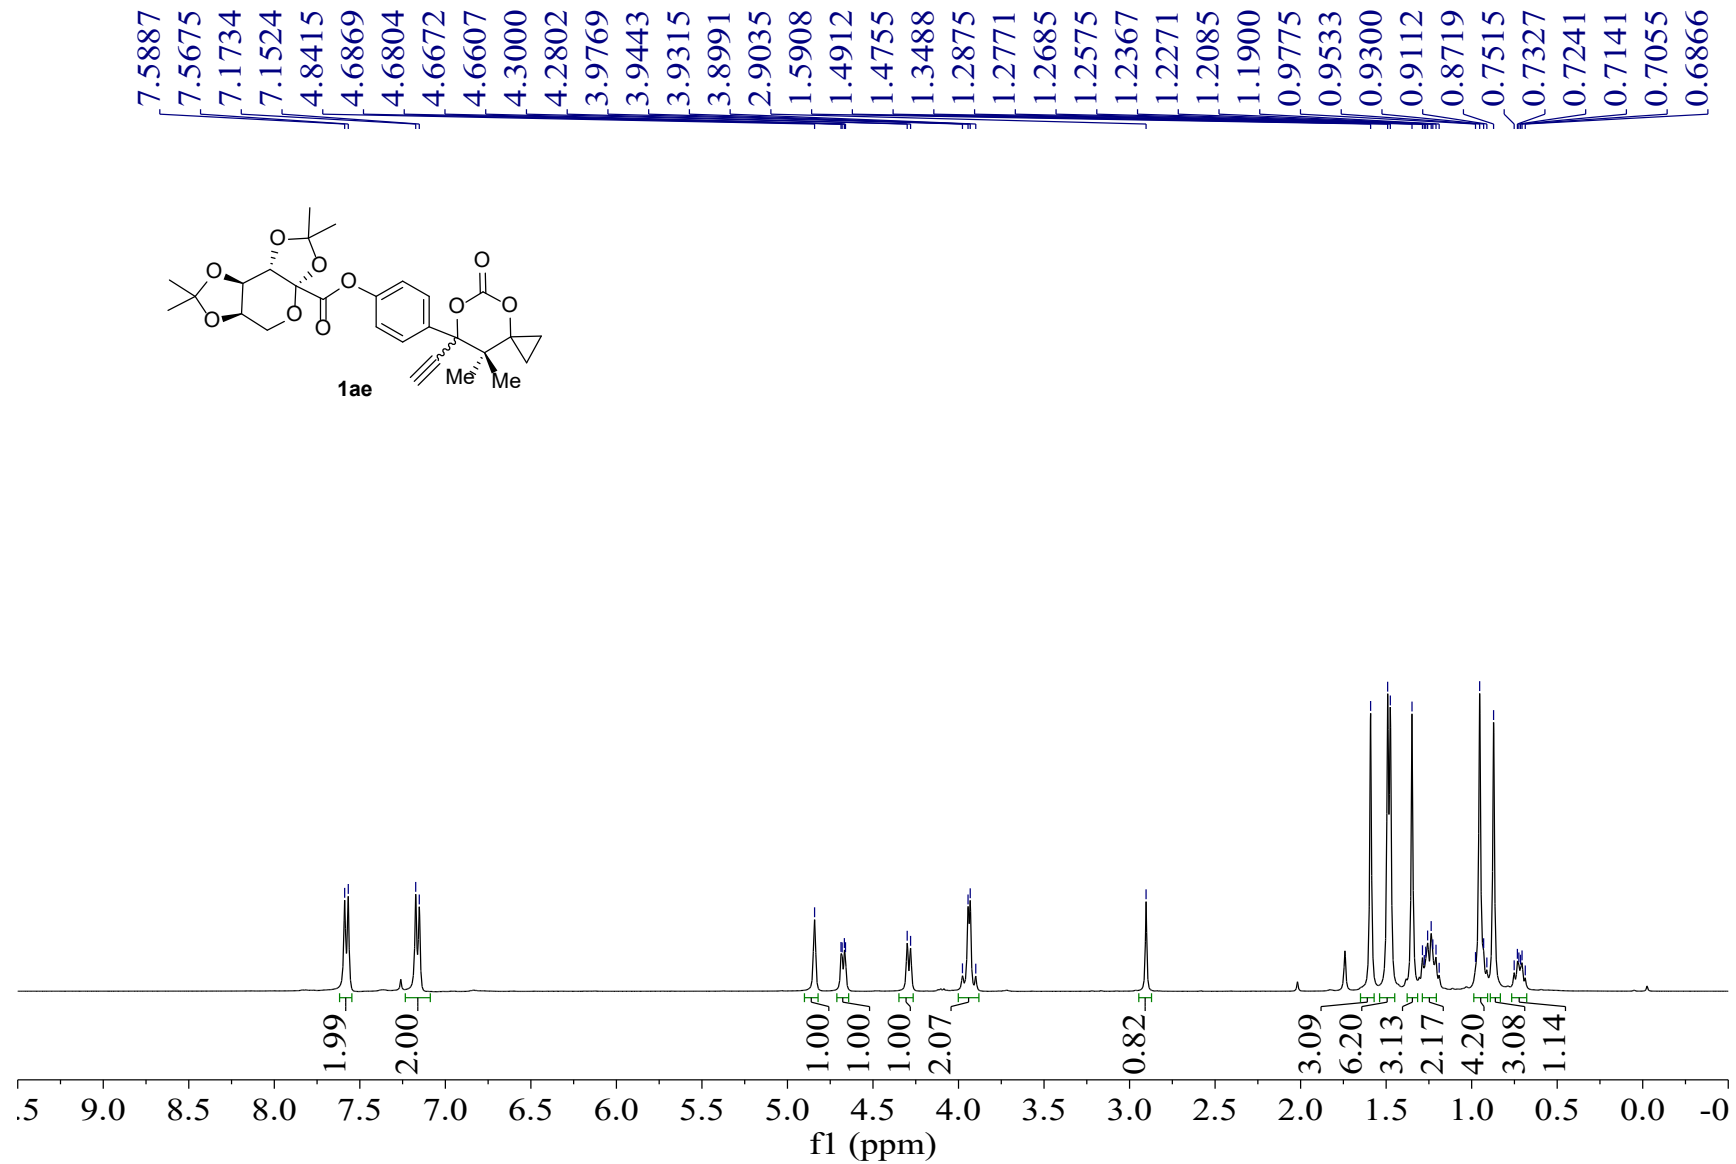

<sup>1</sup>H NMR spectrum of compound **1ae**



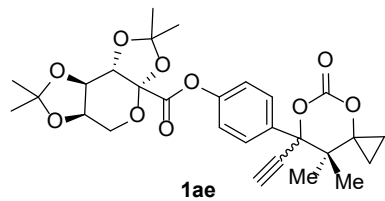

166.63  
166.58

151.04  
148.11

133.92  
128.62  
120.64  
110.97  
109.63

99.84  
85.85  
80.78  
78.60  
72.96  
72.92  
70.35  
70.27  
70.00  
61.78

38.06

26.26  
24.65  
24.52  
19.67  
19.54  
12.26  
7.42

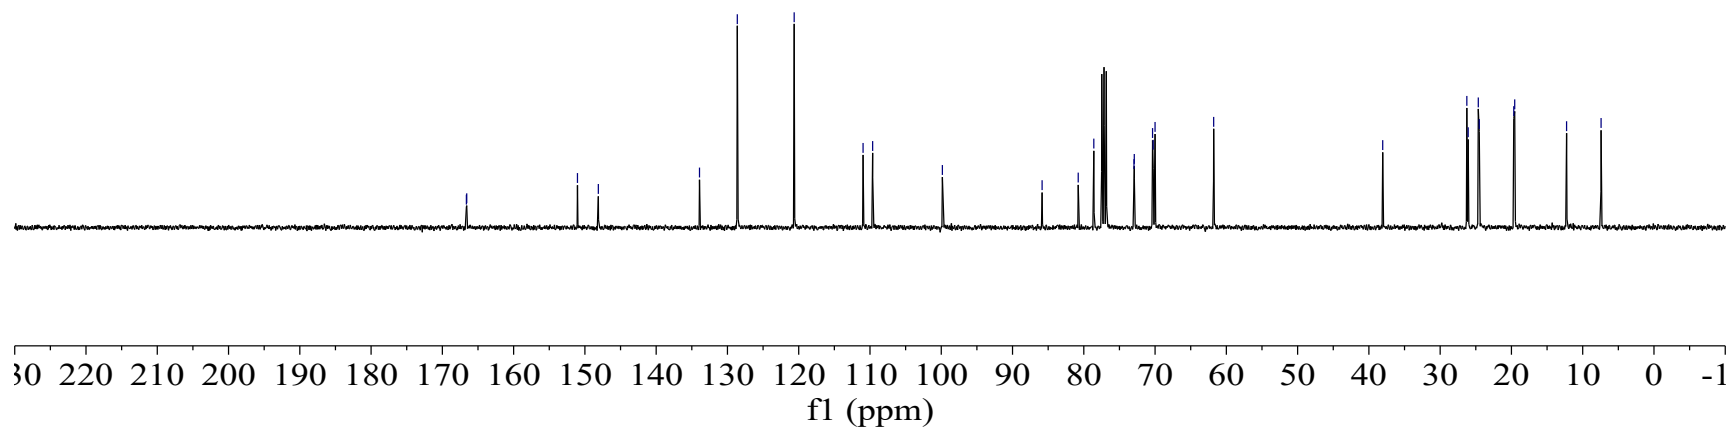

<sup>13</sup>C NMR spectrum of compound **1ae**



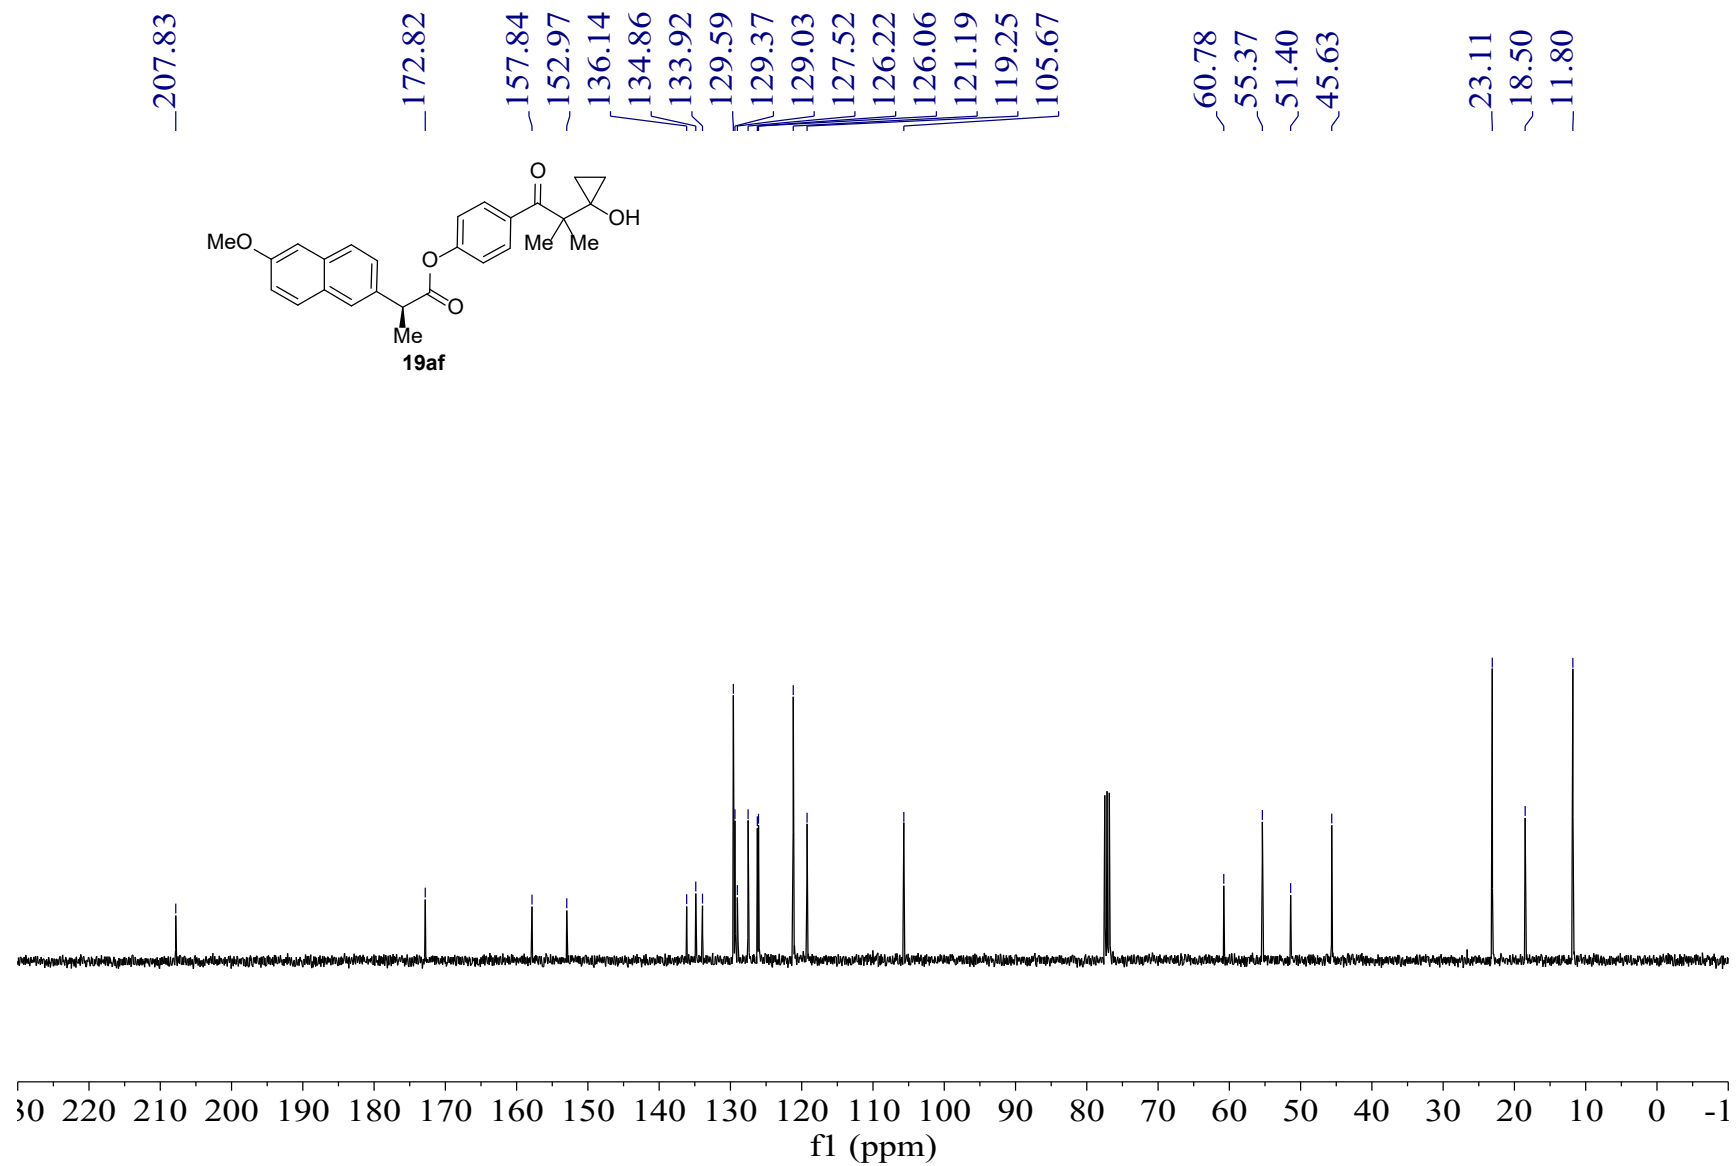

<sup>13</sup>C NMR spectrum of compound **19af**

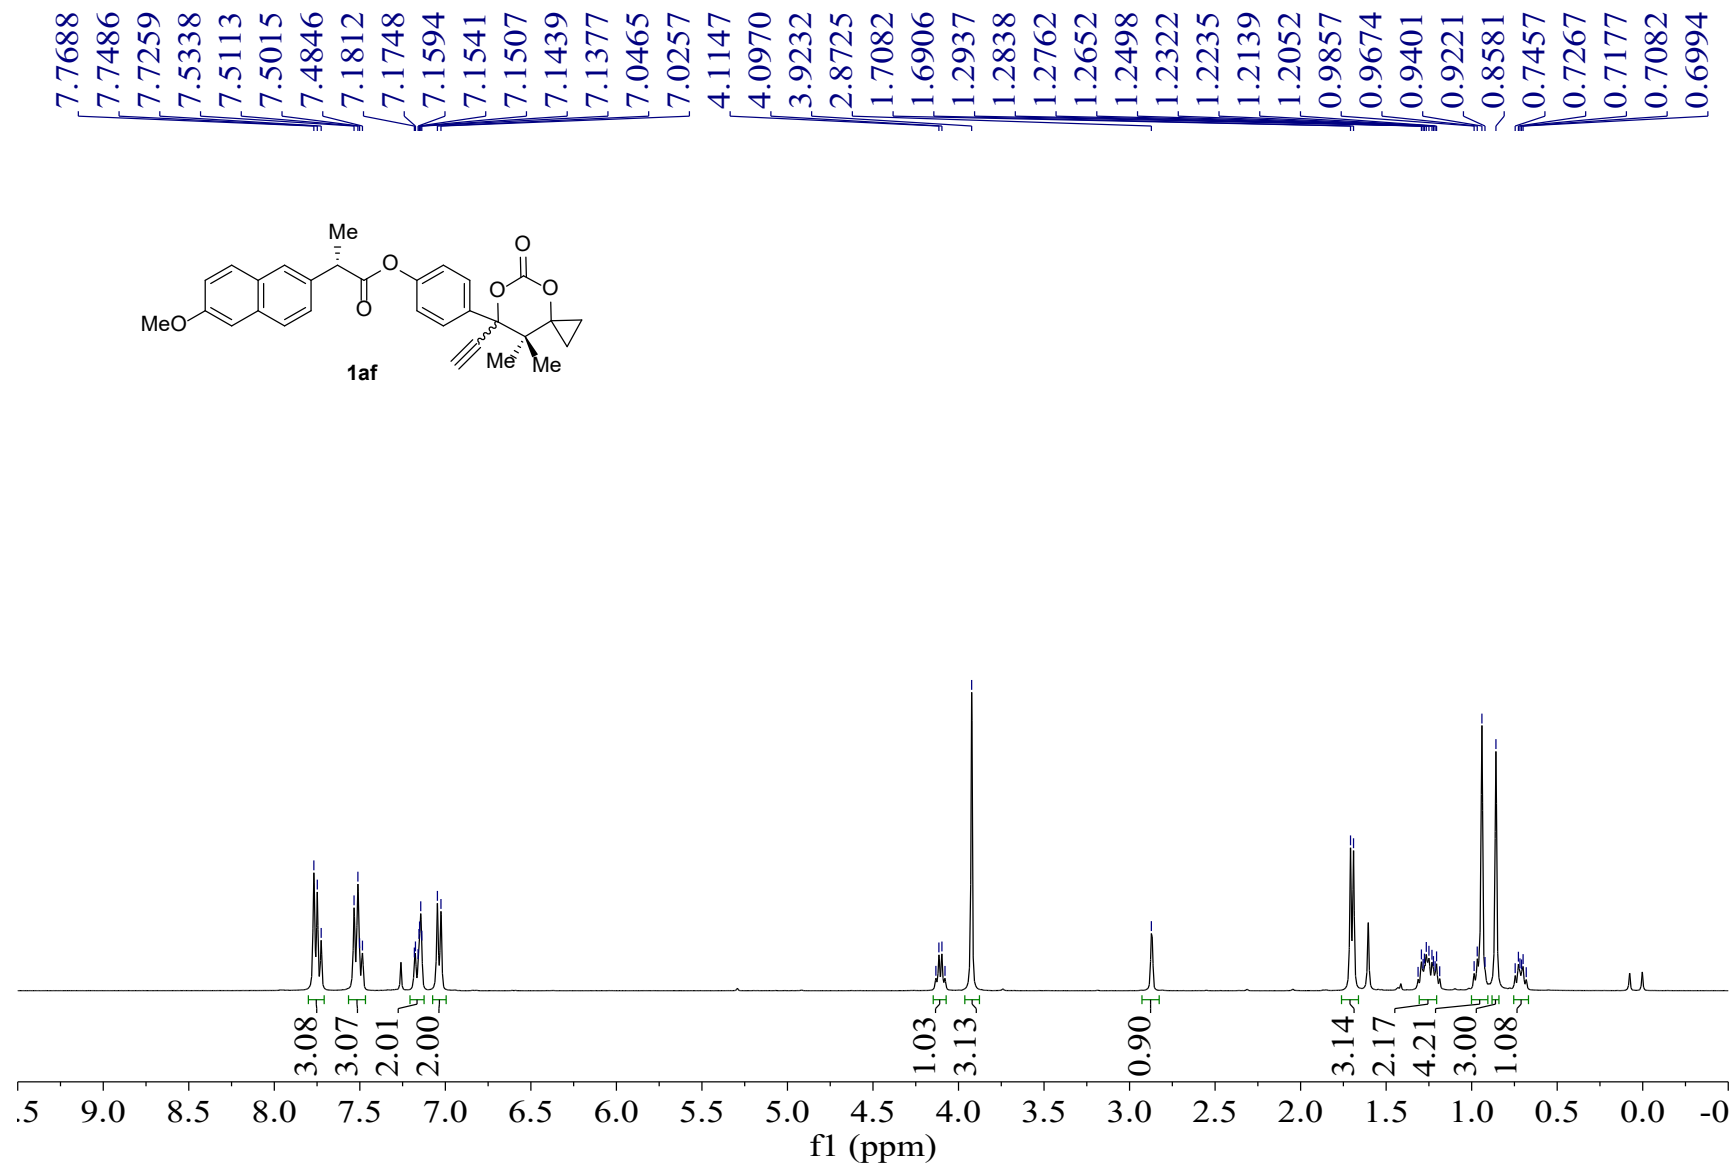

<sup>1</sup>H NMR spectrum of compound **1af**

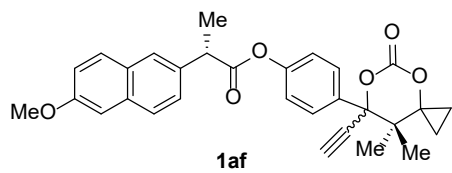

173.06  
 157.93  
 151.33  
 148.19  
 135.02  
 133.99  
 133.42  
 129.43  
 129.11  
 128.47  
 127.57  
 126.28  
 126.16  
 120.79  
 119.30  
 105.75  
 85.91  
 80.90  
 78.45  
 70.26  
 55.47  
 45.72  
 38.08  
 19.70  
 19.55  
 18.59  
 12.28  
 7.45

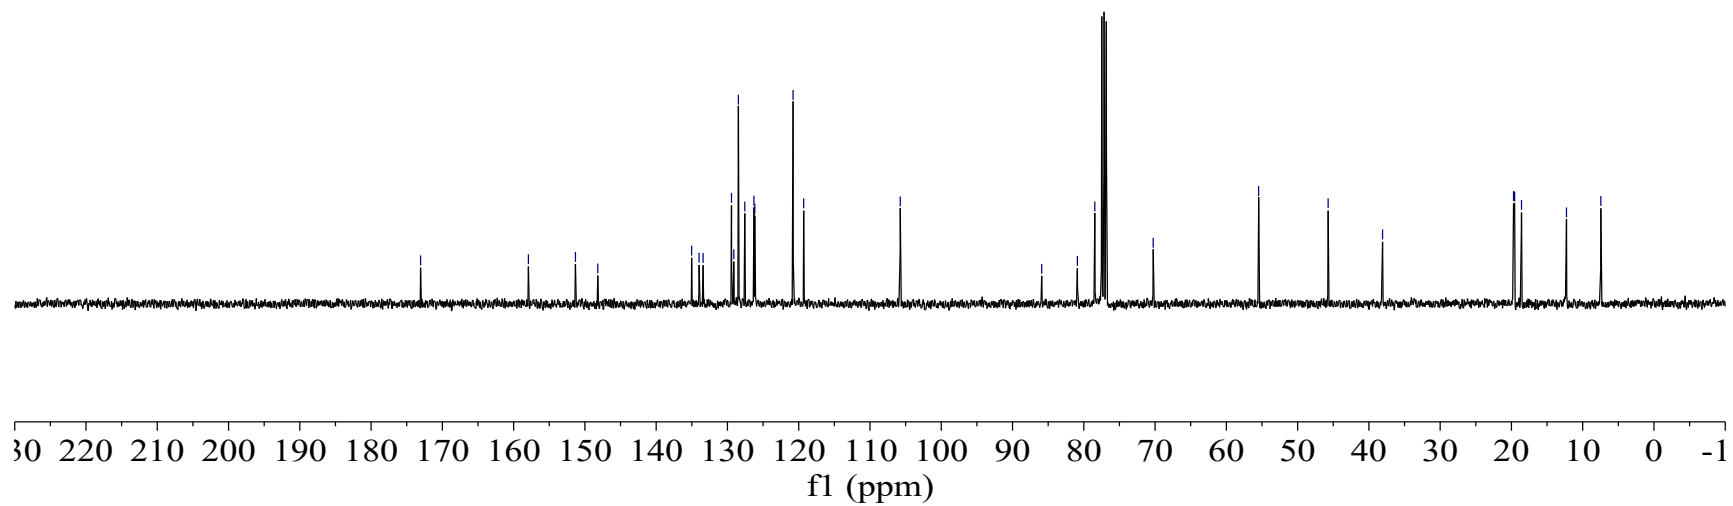

<sup>13</sup>C NMR spectrum of compound **1af**

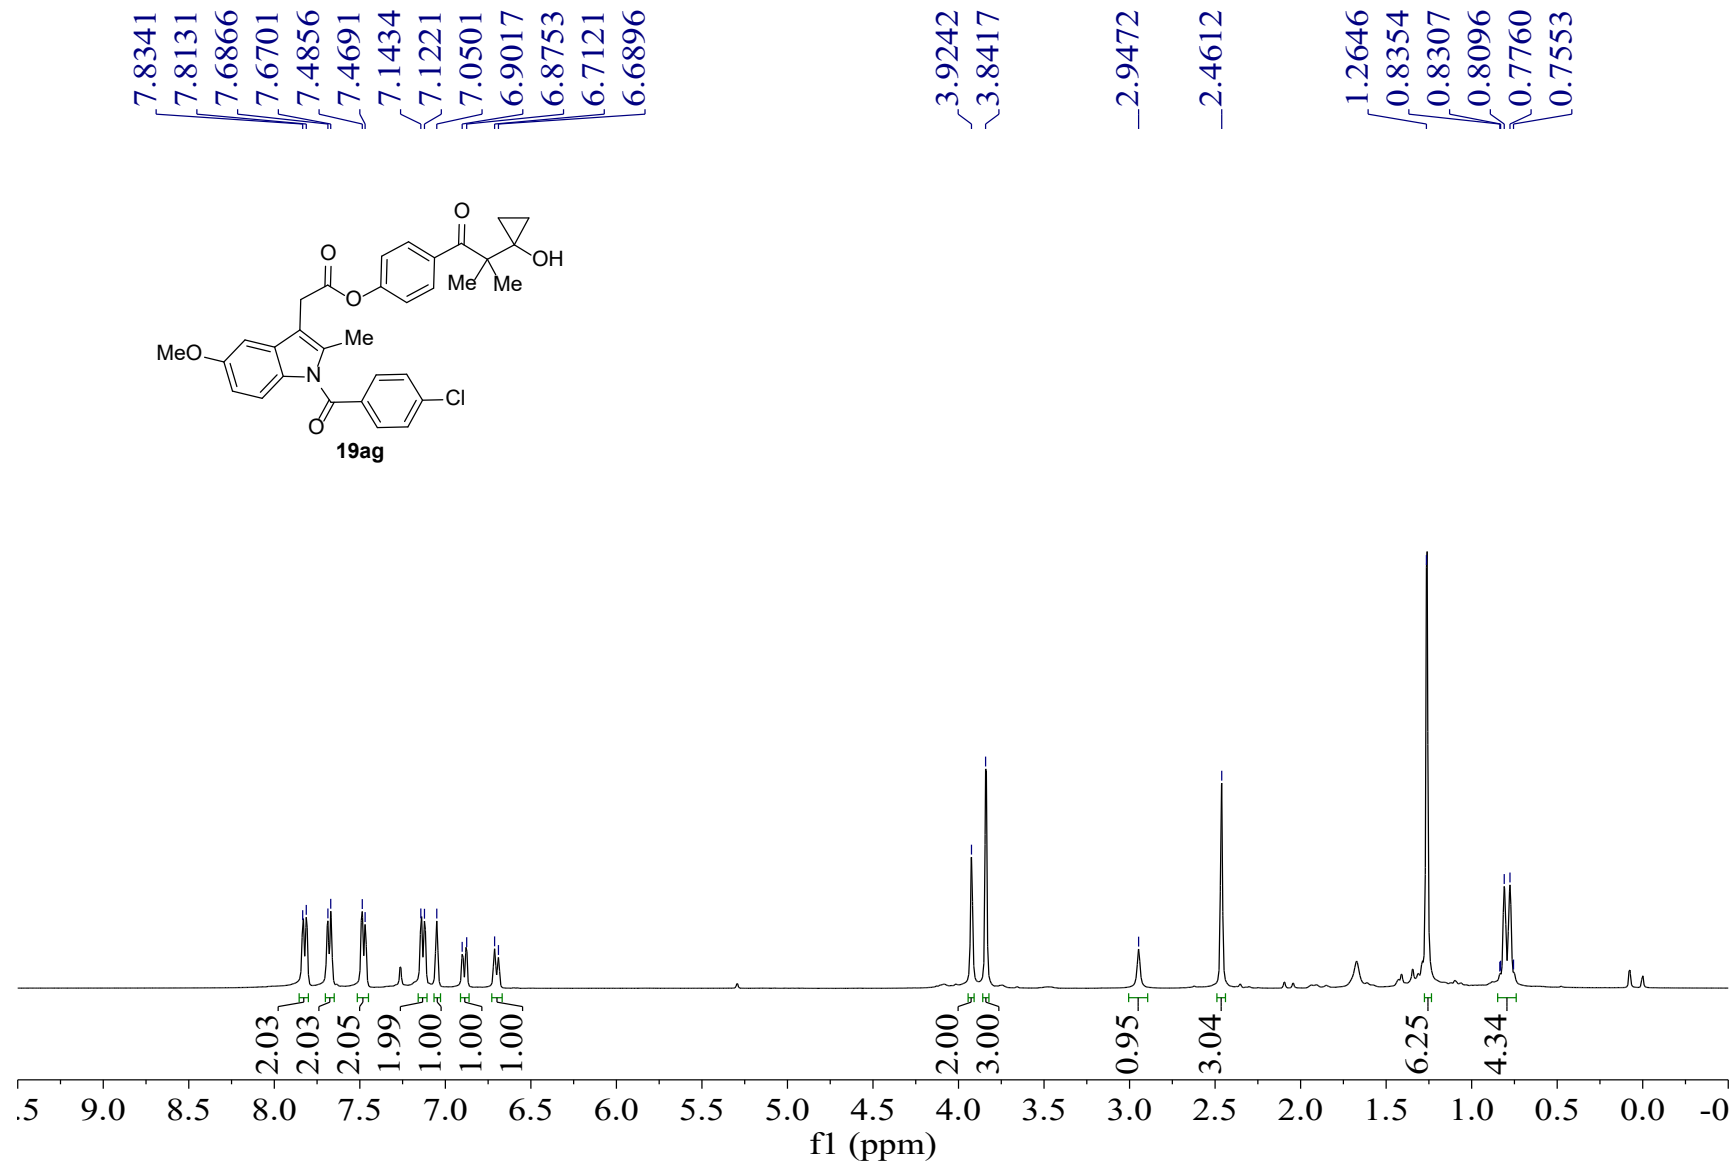

<sup>1</sup>H NMR spectrum of compound **19ag**

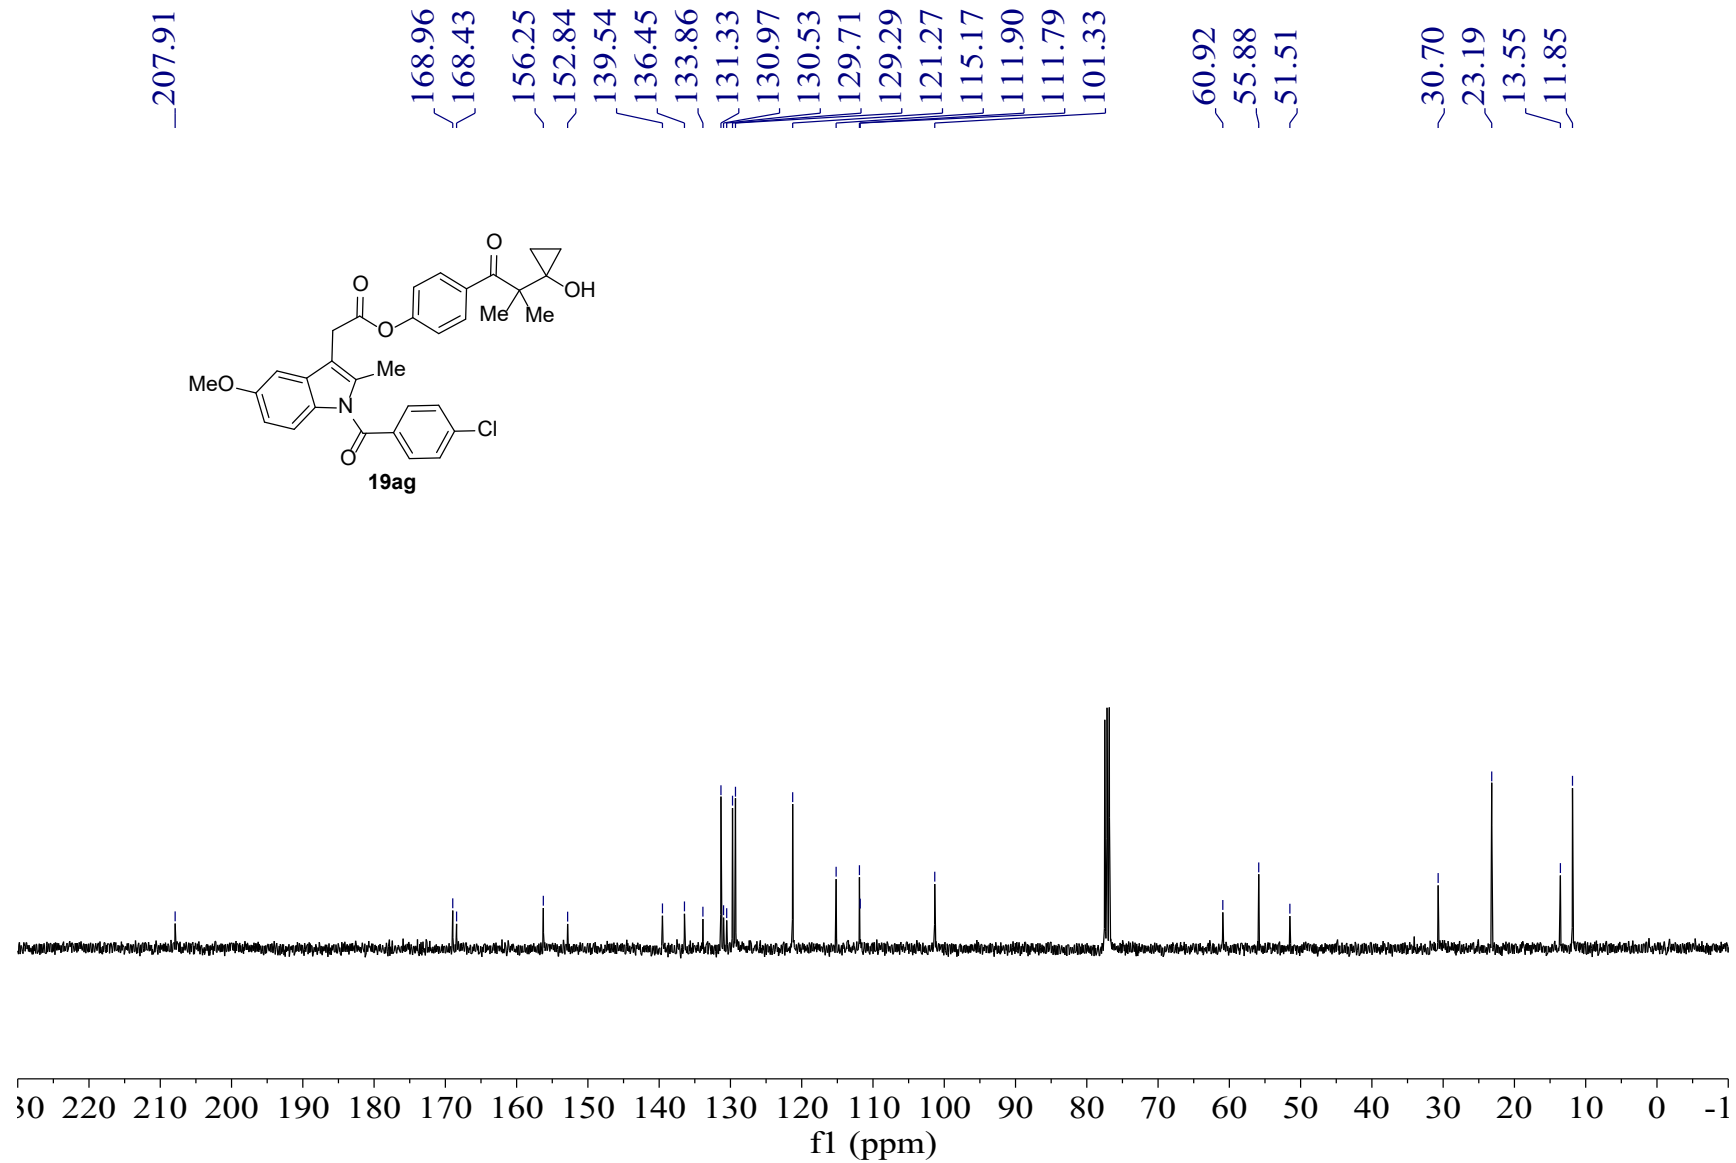

<sup>13</sup>C NMR spectrum of compound **19ag**





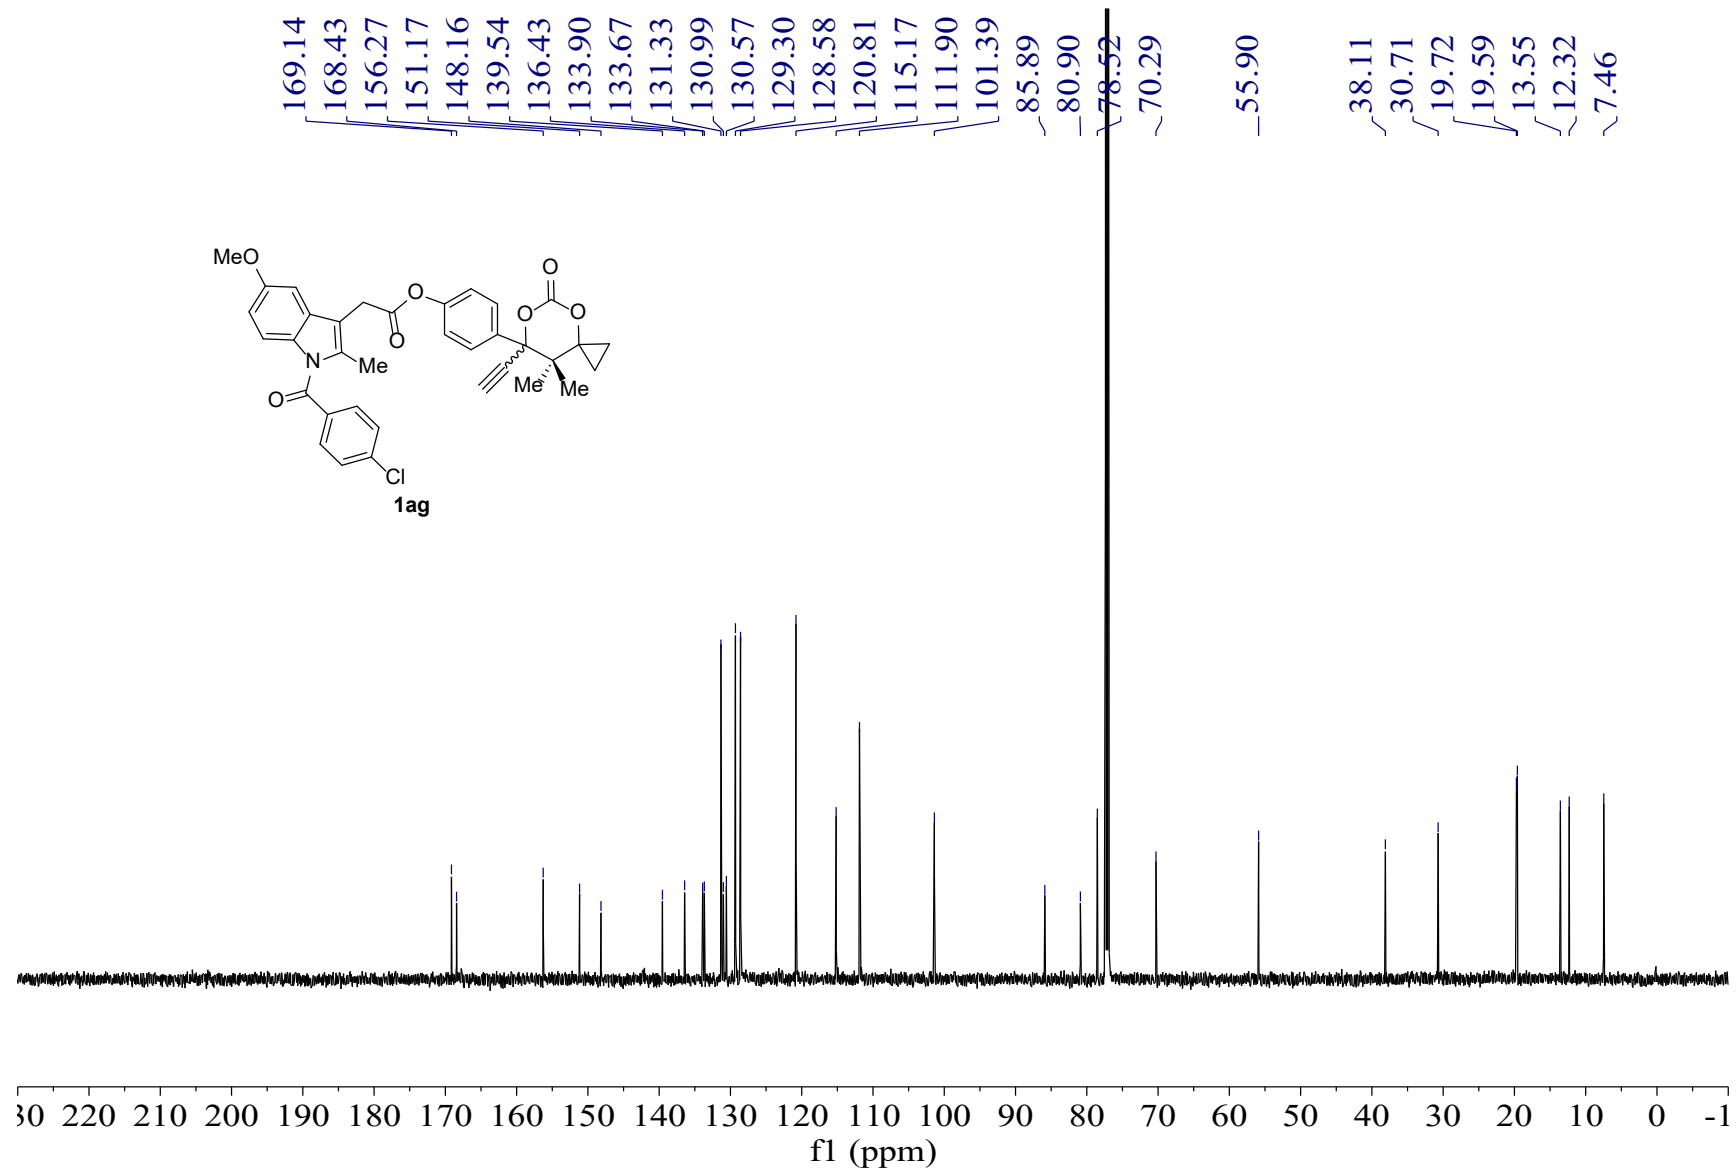

<sup>13</sup>C NMR spectrum of compound **1ag**

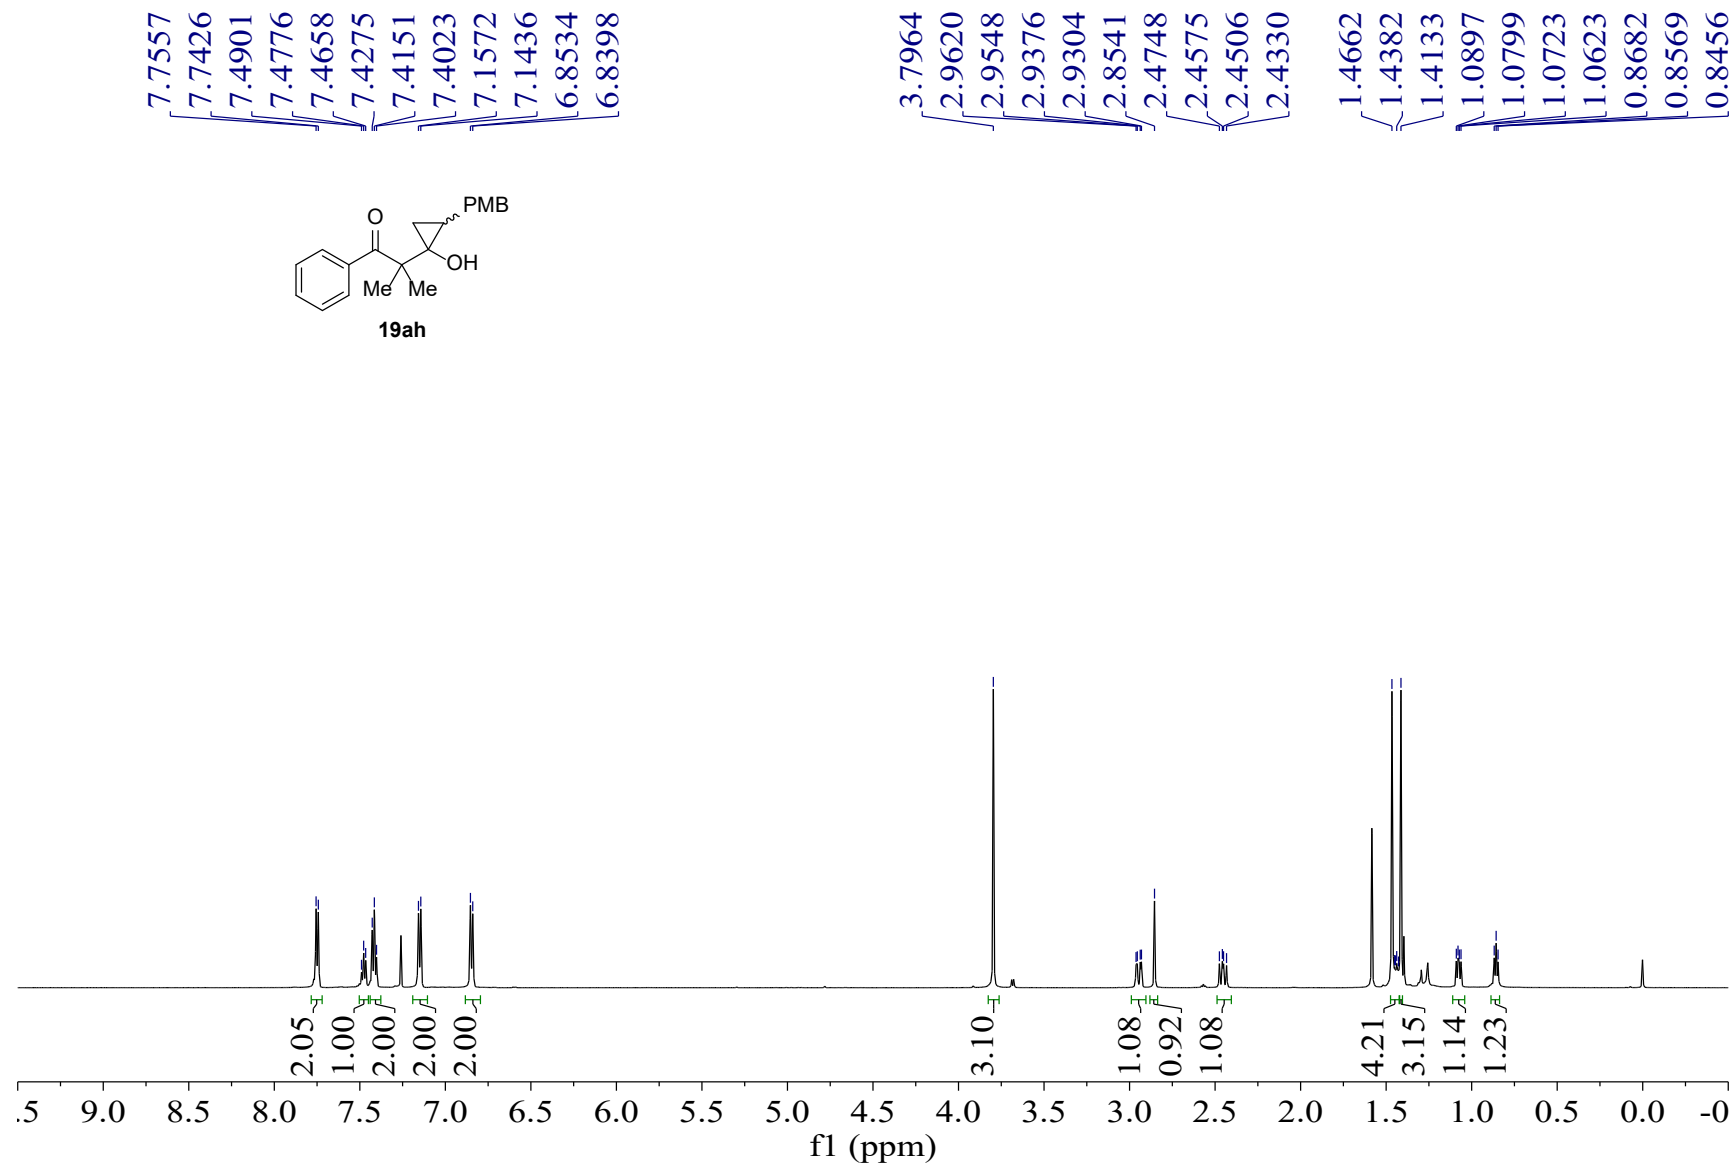

<sup>1</sup>H NMR spectrum of compound **19ah**

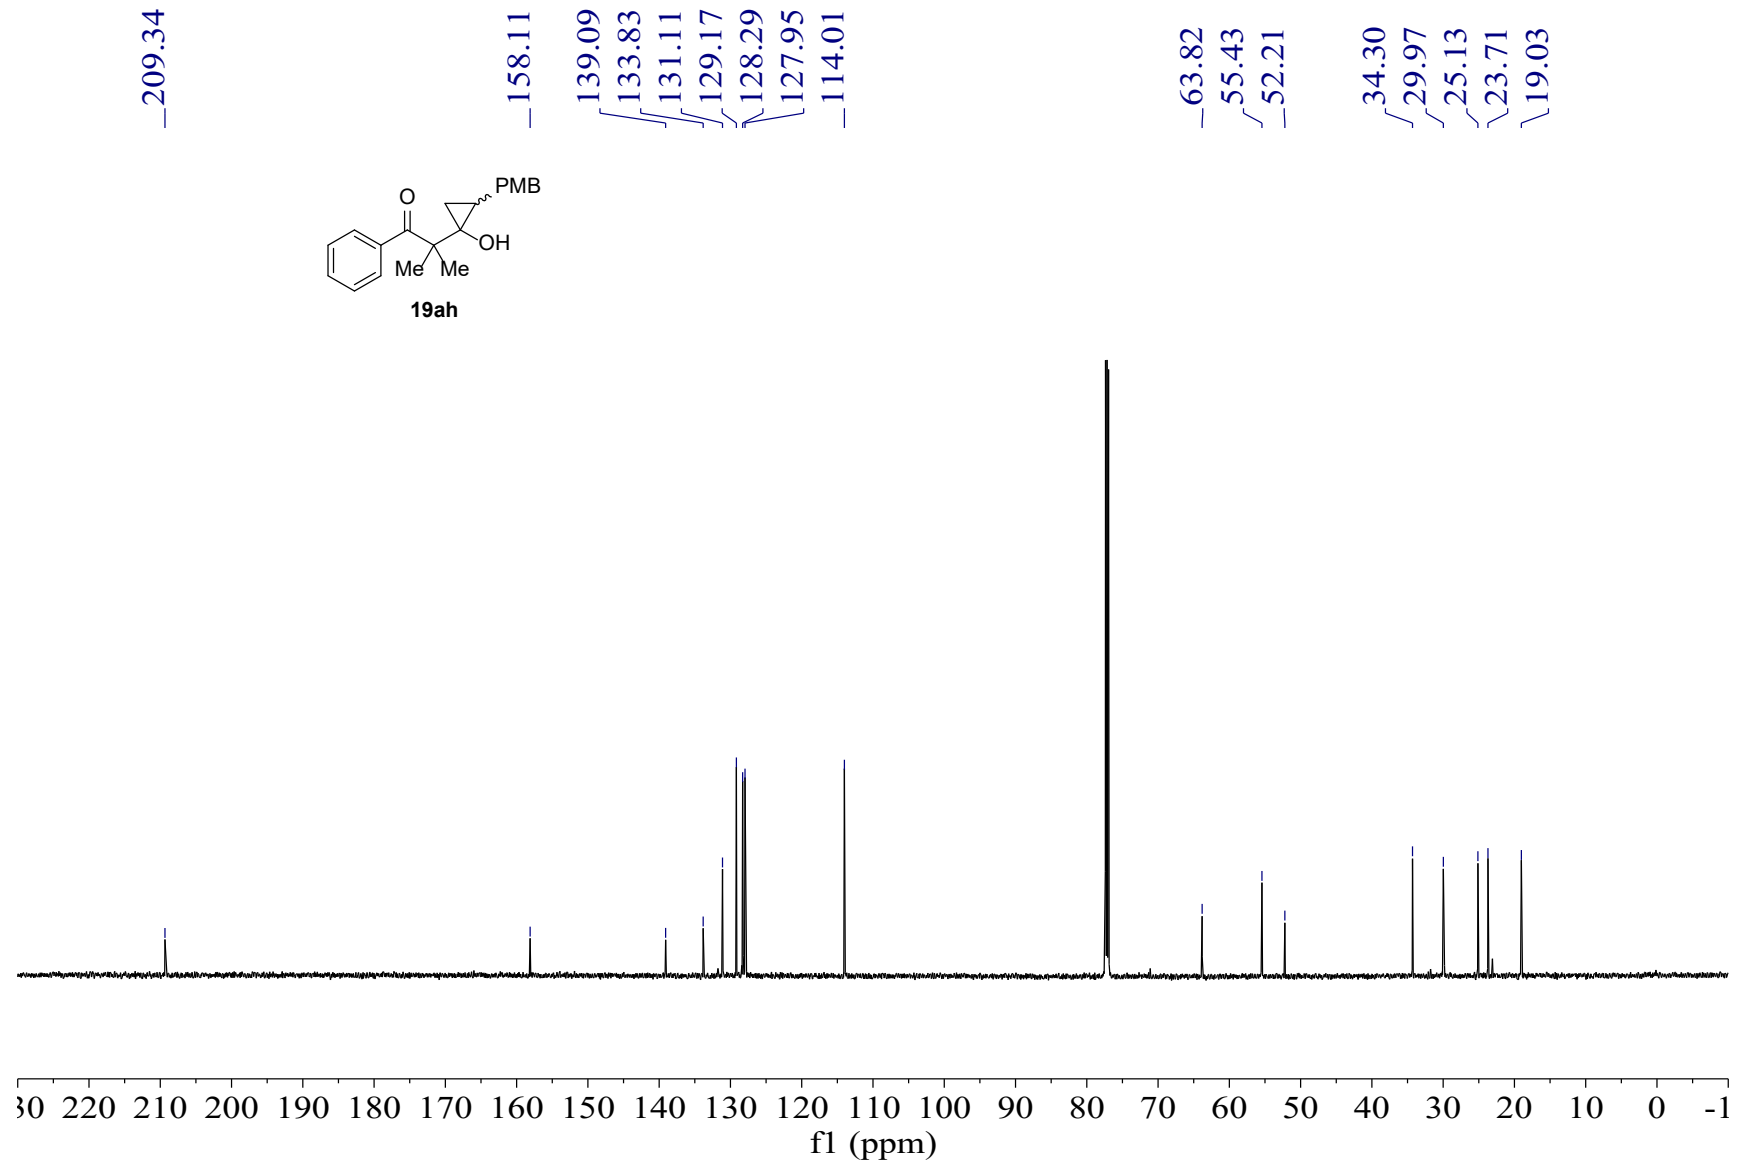

<sup>13</sup>C NMR spectrum of compound **19ah**

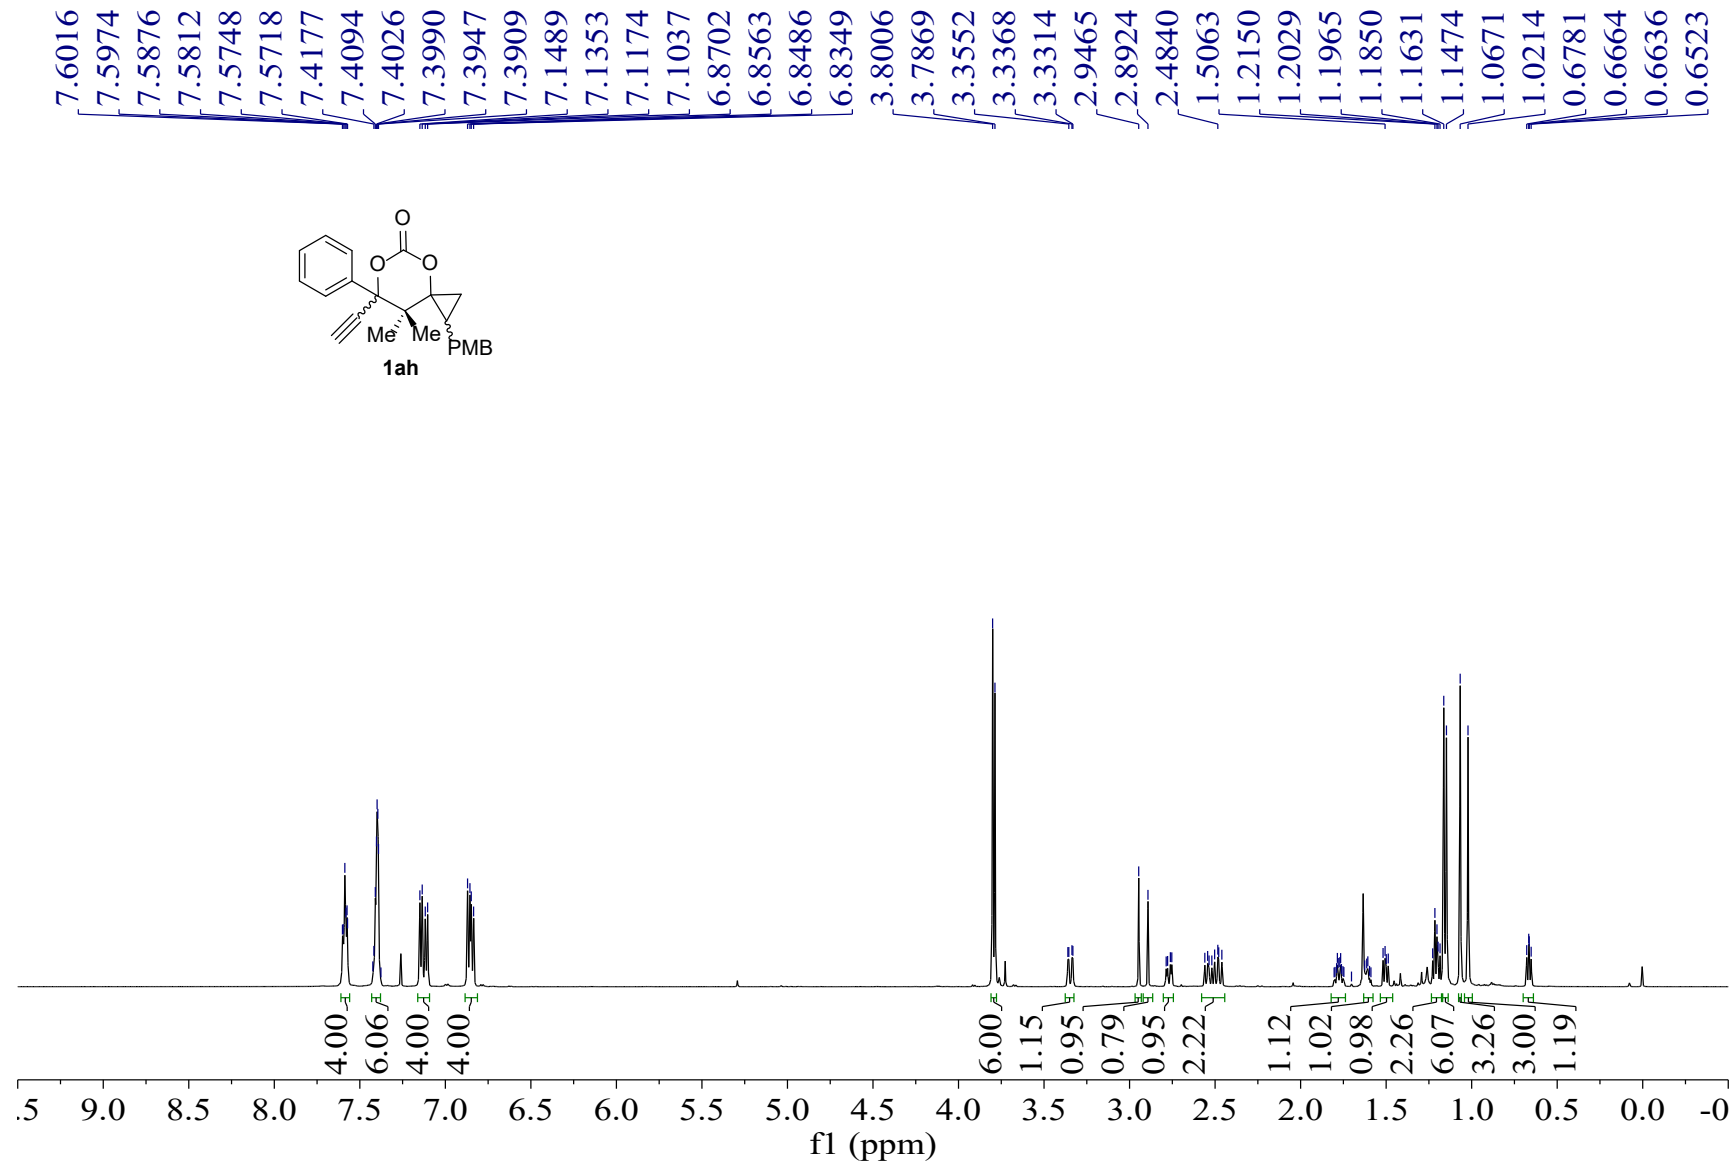

<sup>1</sup>H NMR spectrum of compound **1ah**

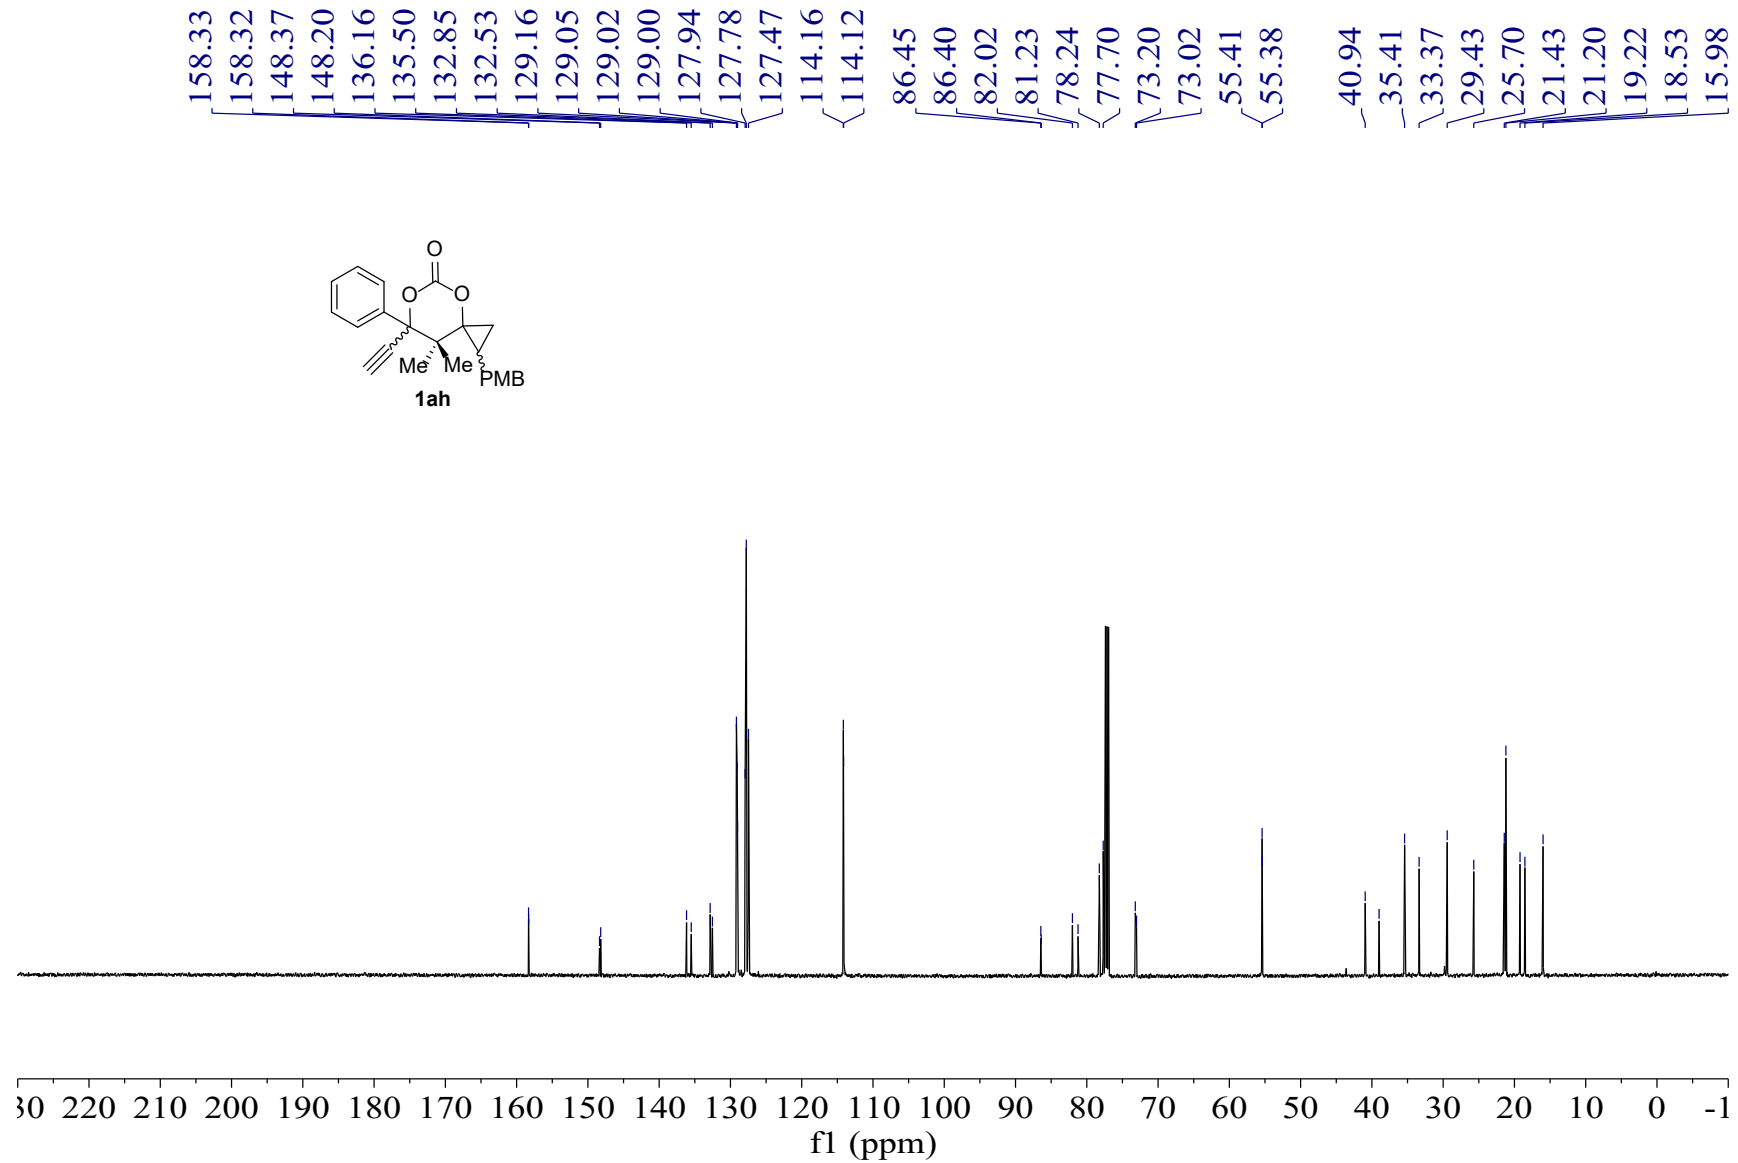

<sup>13</sup>C NMR spectrum of compound **1ah**

7.7563  
7.7439  
7.4617  
7.4494  
7.4373  
7.4069  
7.3942  
7.3819  
7.2600

2.2849  
1.7405  
1.7279  
1.7160  
1.7041  
1.6917  
1.6791  
1.6730  
1.6605  
1.6482  
1.6364  
1.6243  
1.6084  
0.9251  
0.9127  
0.9002  
0.8535  
0.8443  
0.8407  
0.8317  
0.7812  
0.7765  
0.7676  
0.7638  
0.7547

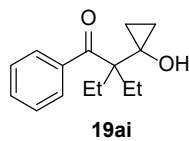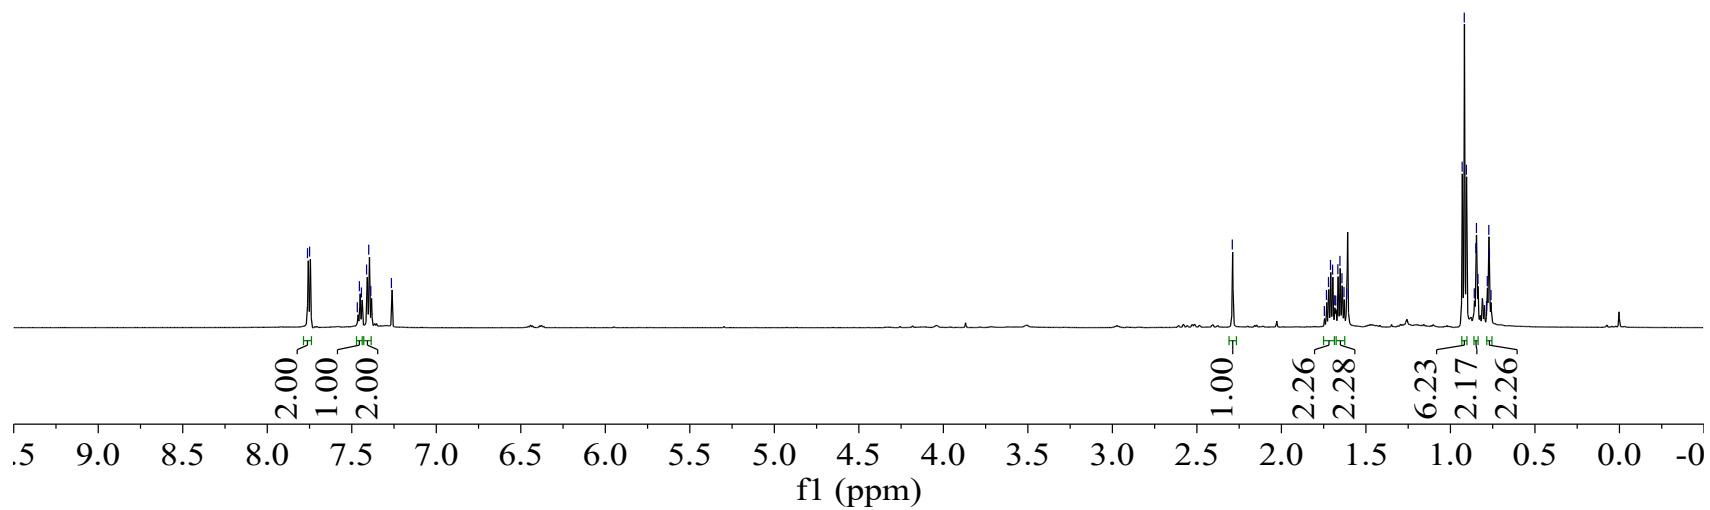

<sup>1</sup>H NMR spectrum of compound **19ai**

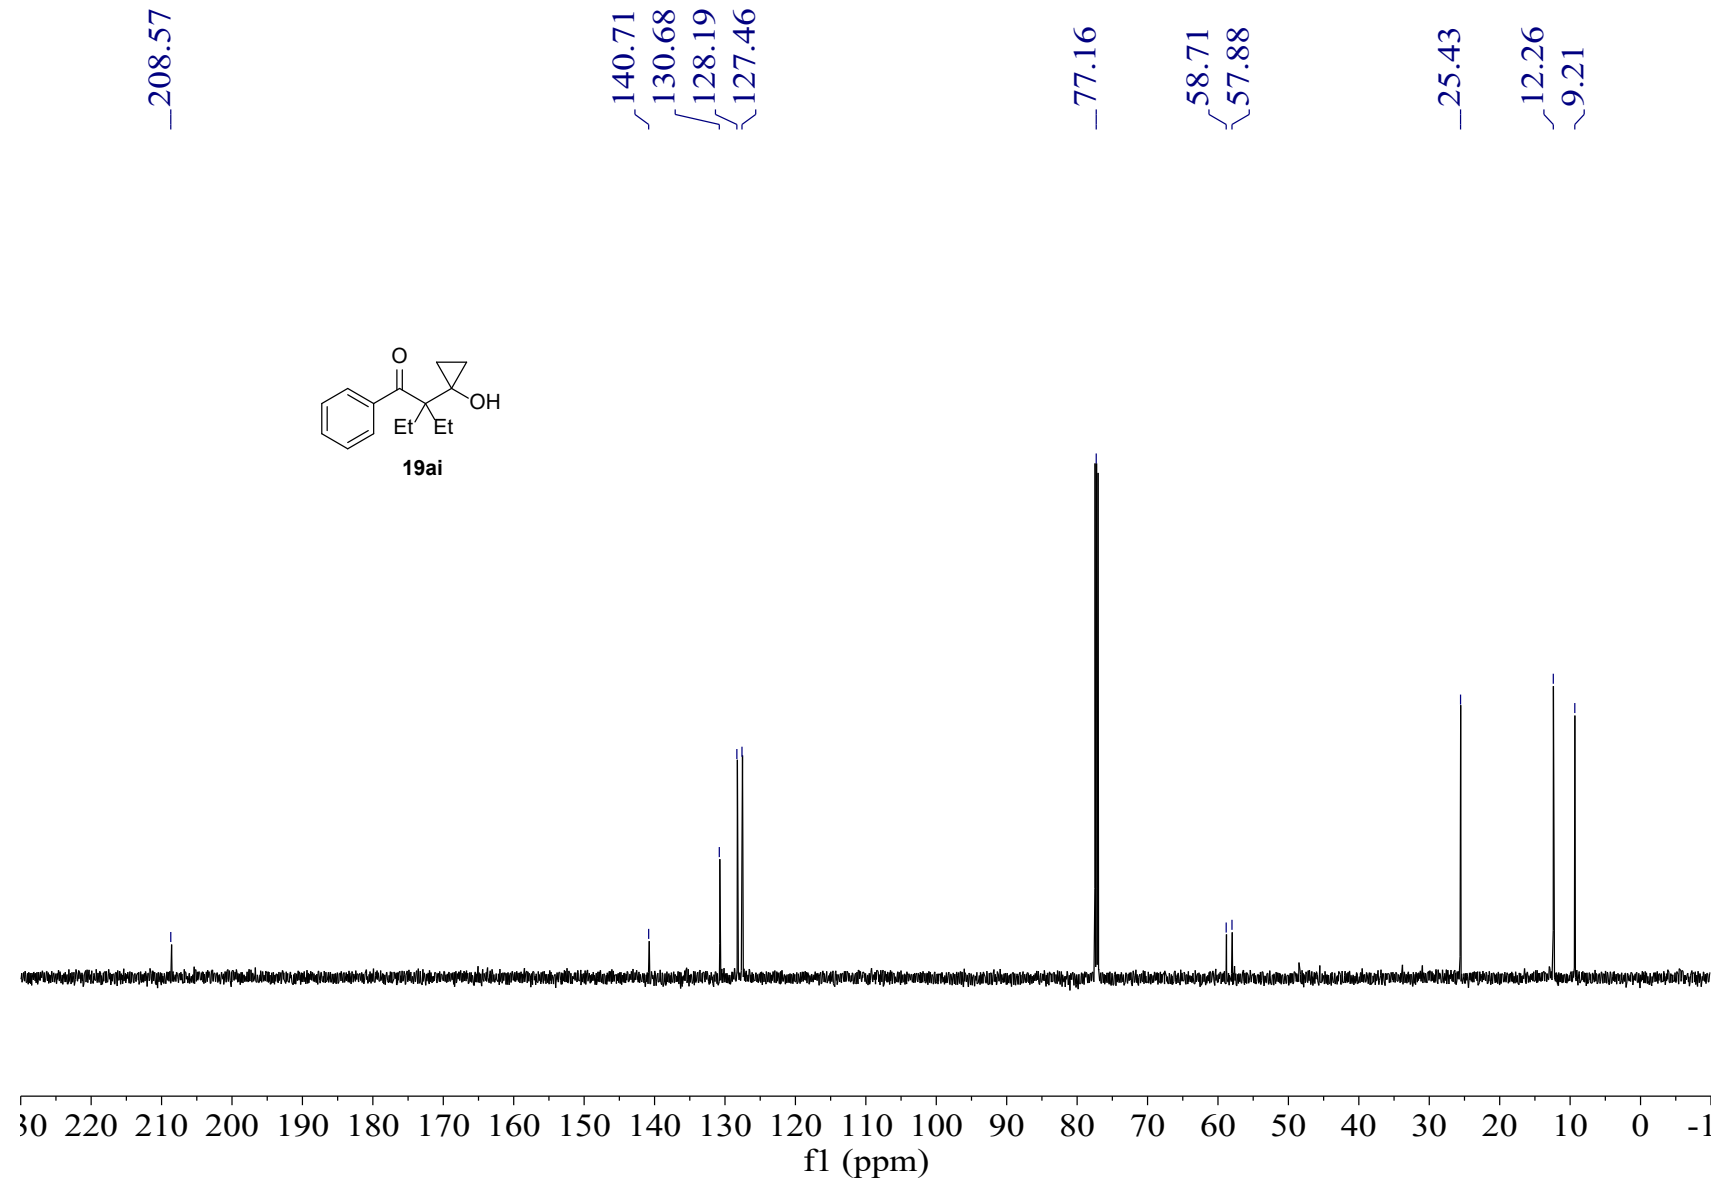

<sup>13</sup>C NMR spectrum of compound **19ai**

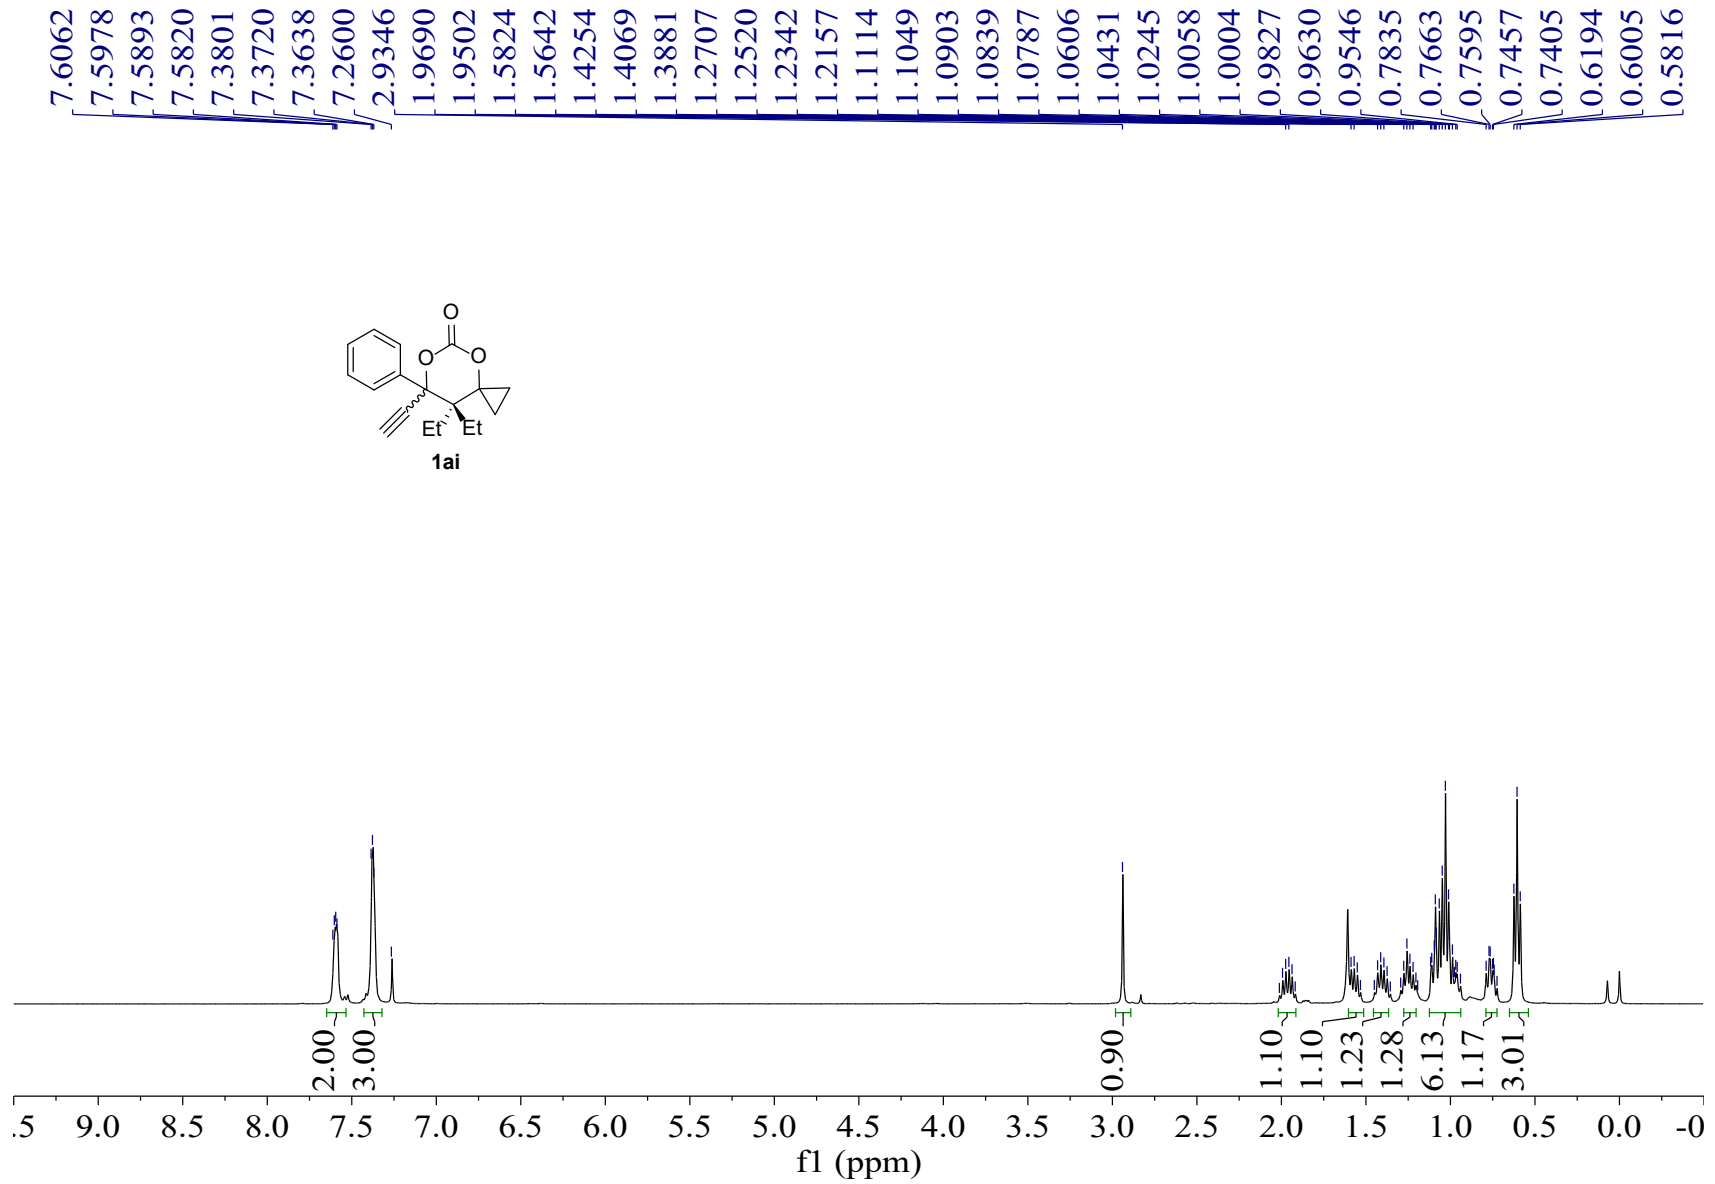

<sup>1</sup>H NMR spectrum of compound **1ai**



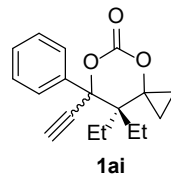

148.72  
136.90  
129.07  
127.95  
127.72

88.47  
82.10  
78.96  
77.16  
66.96

42.08

22.13  
20.82  
9.21  
9.19  
8.71  
8.50

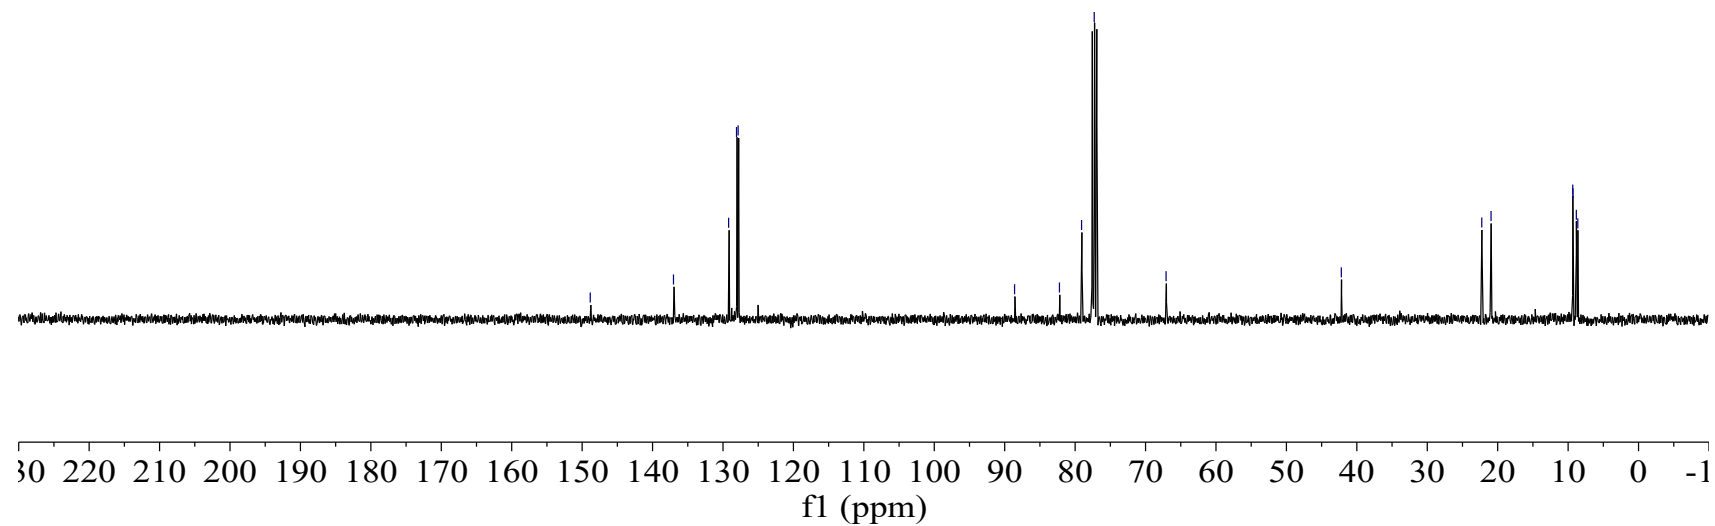

<sup>13</sup>C NMR spectrum of compound **1ai**

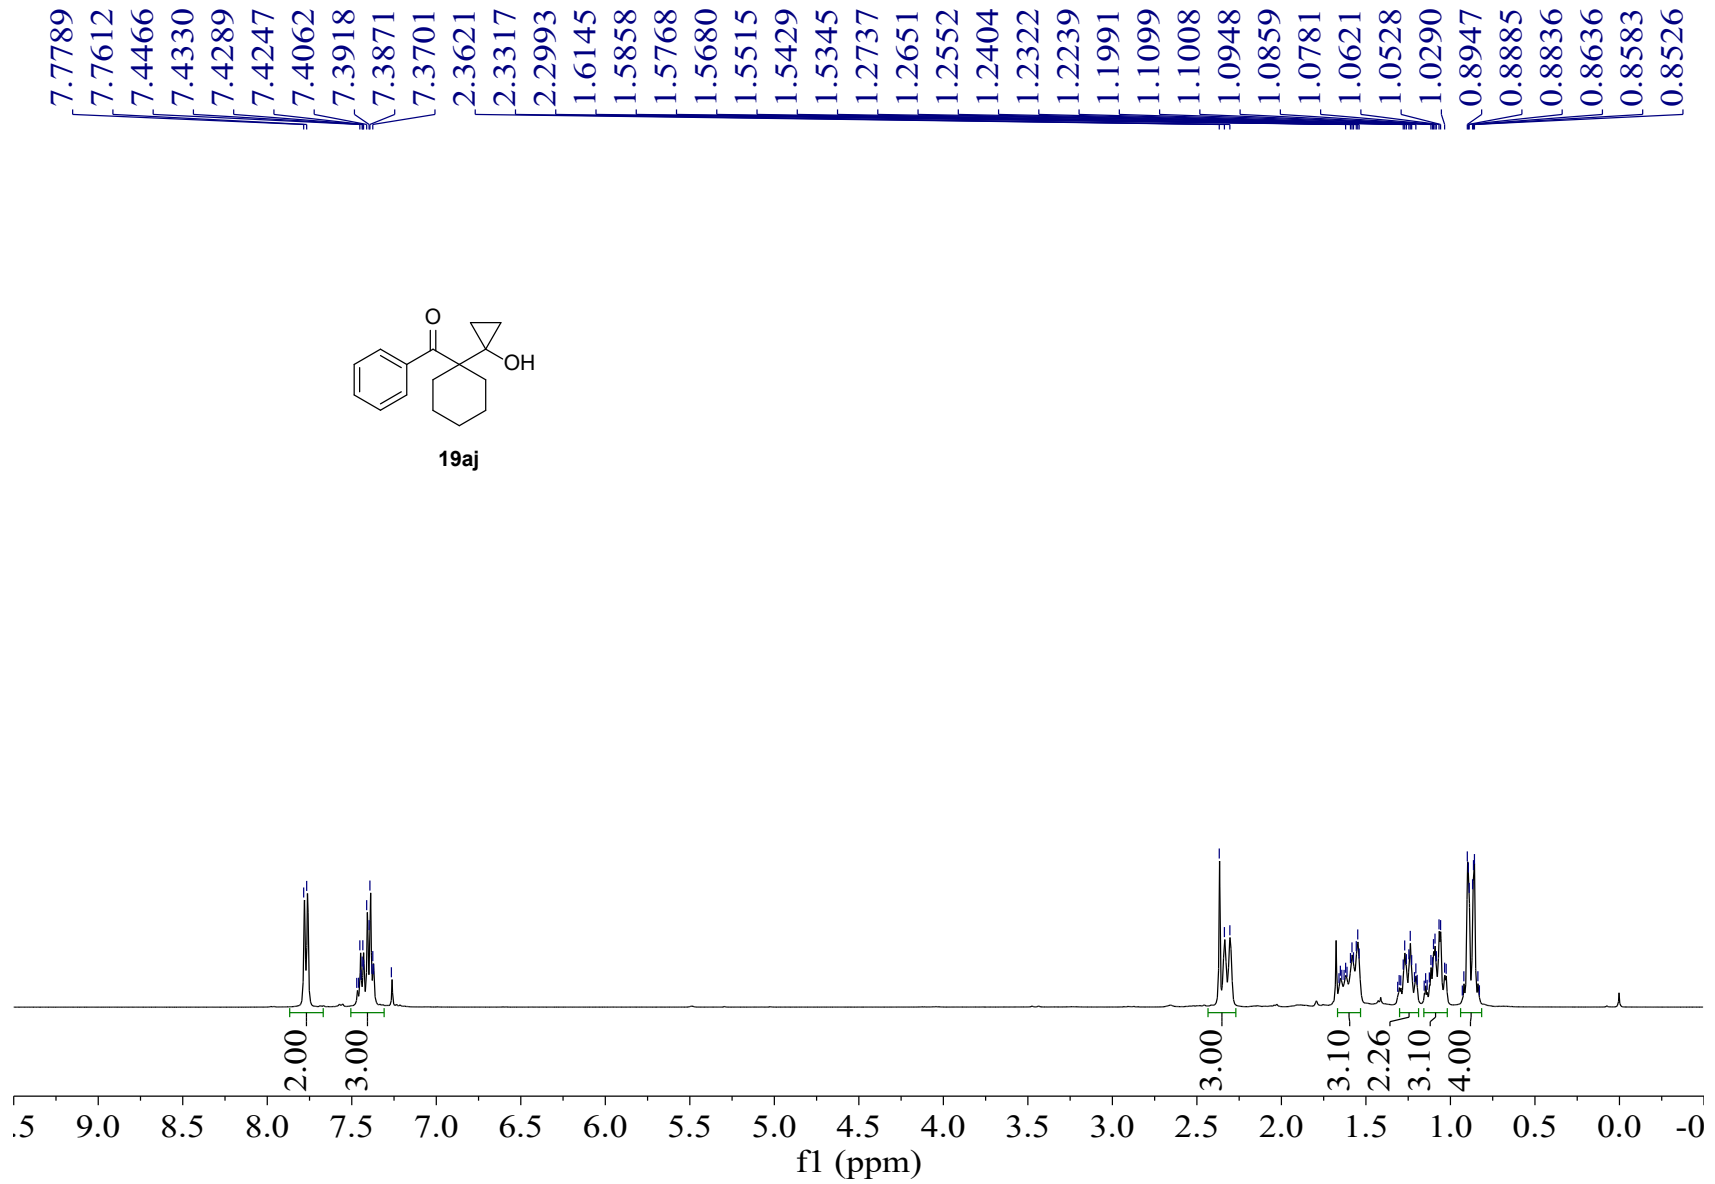

<sup>1</sup>H NMR spectrum of compound **19aj**

208.74

140.55  
130.59  
128.11  
127.32

61.86  
55.25

31.50  
25.92  
23.15  
12.77

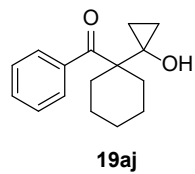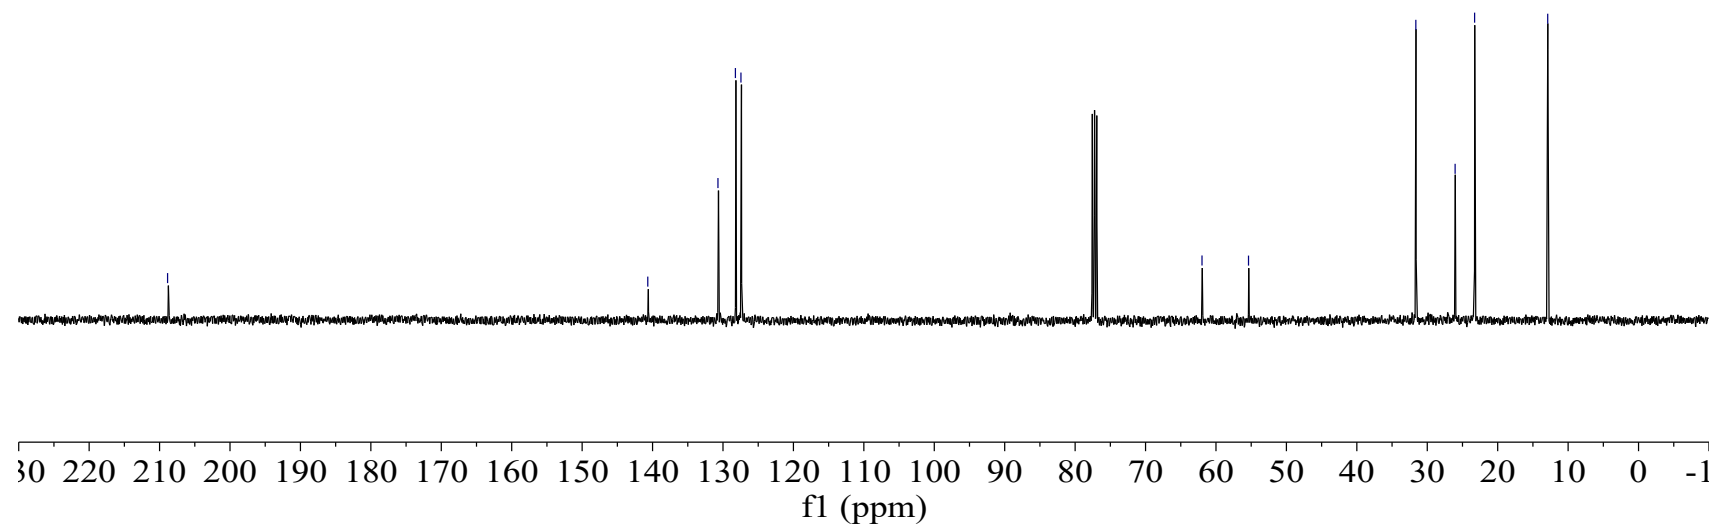

<sup>13</sup>C NMR spectrum of compound **19aj**

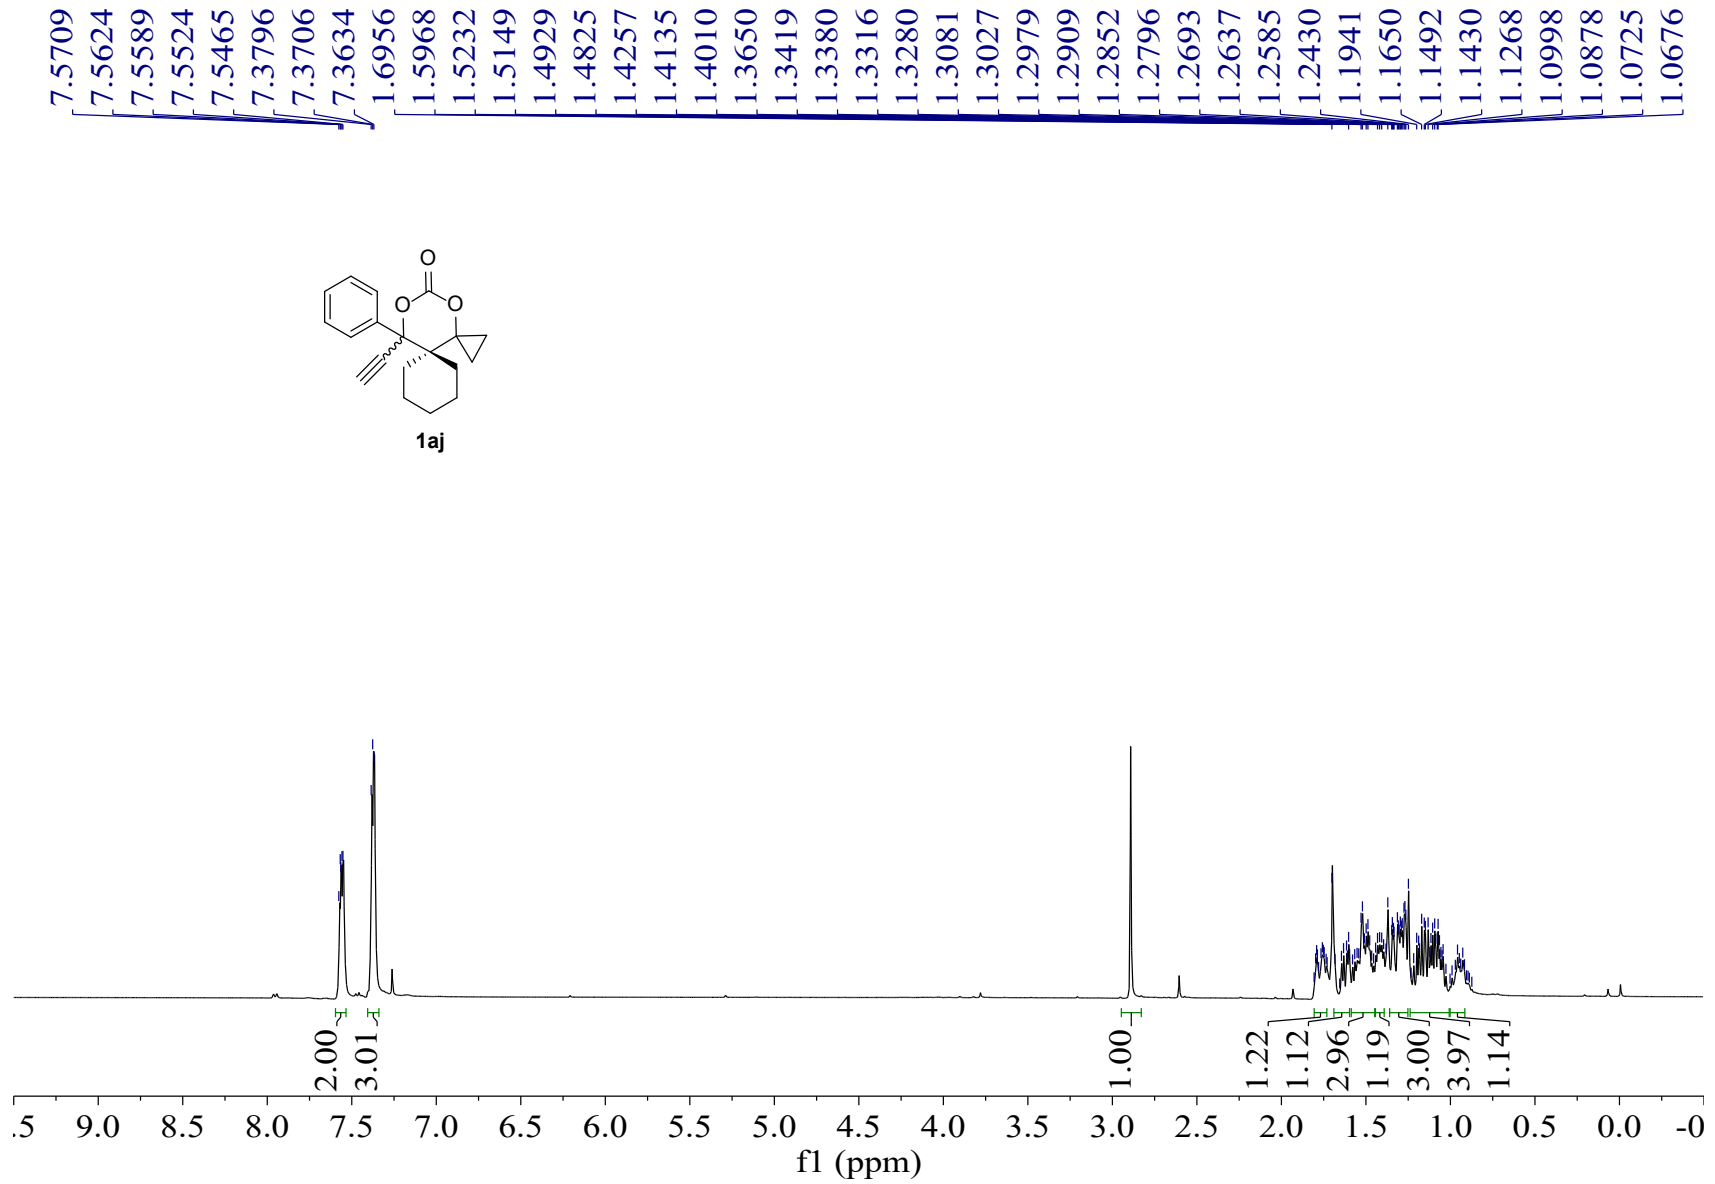

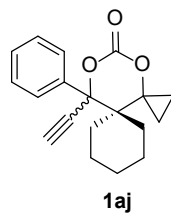

148.65  
136.37  
128.93  
128.25  
127.59

88.42  
81.66  
78.60  
68.20

39.17  
27.52  
26.99  
24.49  
21.44  
20.51  
11.67  
10.46

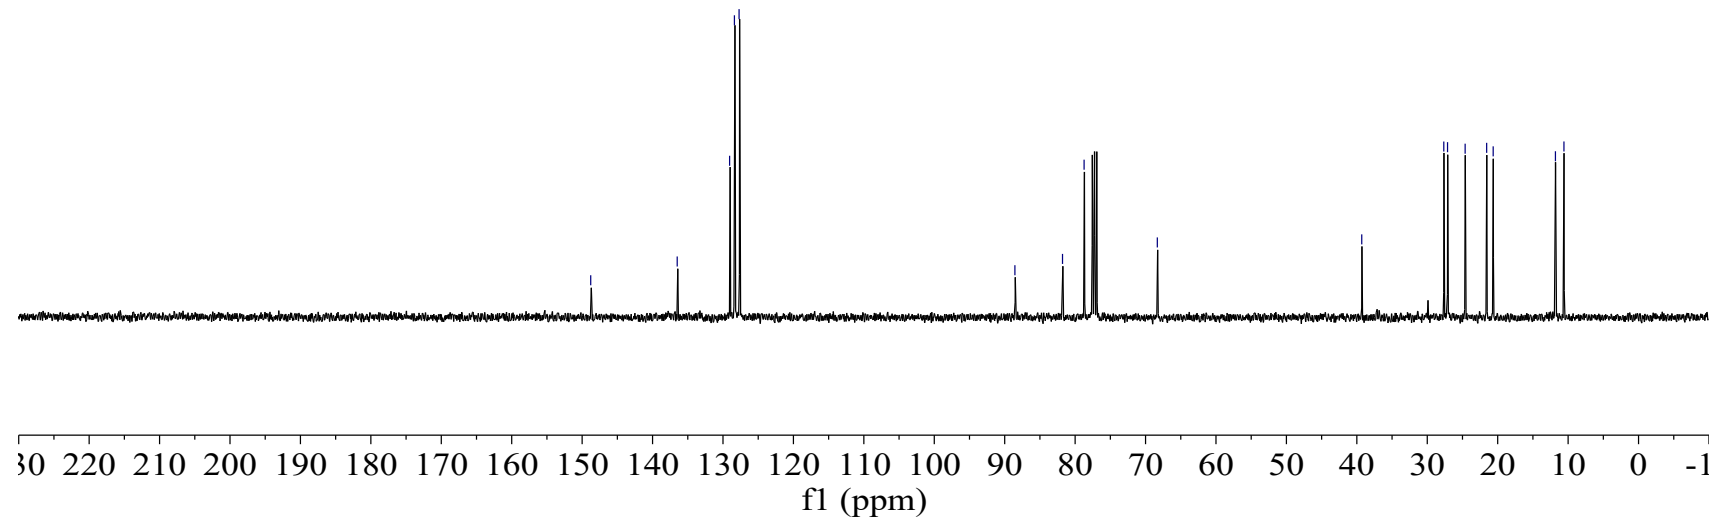

<sup>13</sup>C NMR spectrum of compound **1aj**

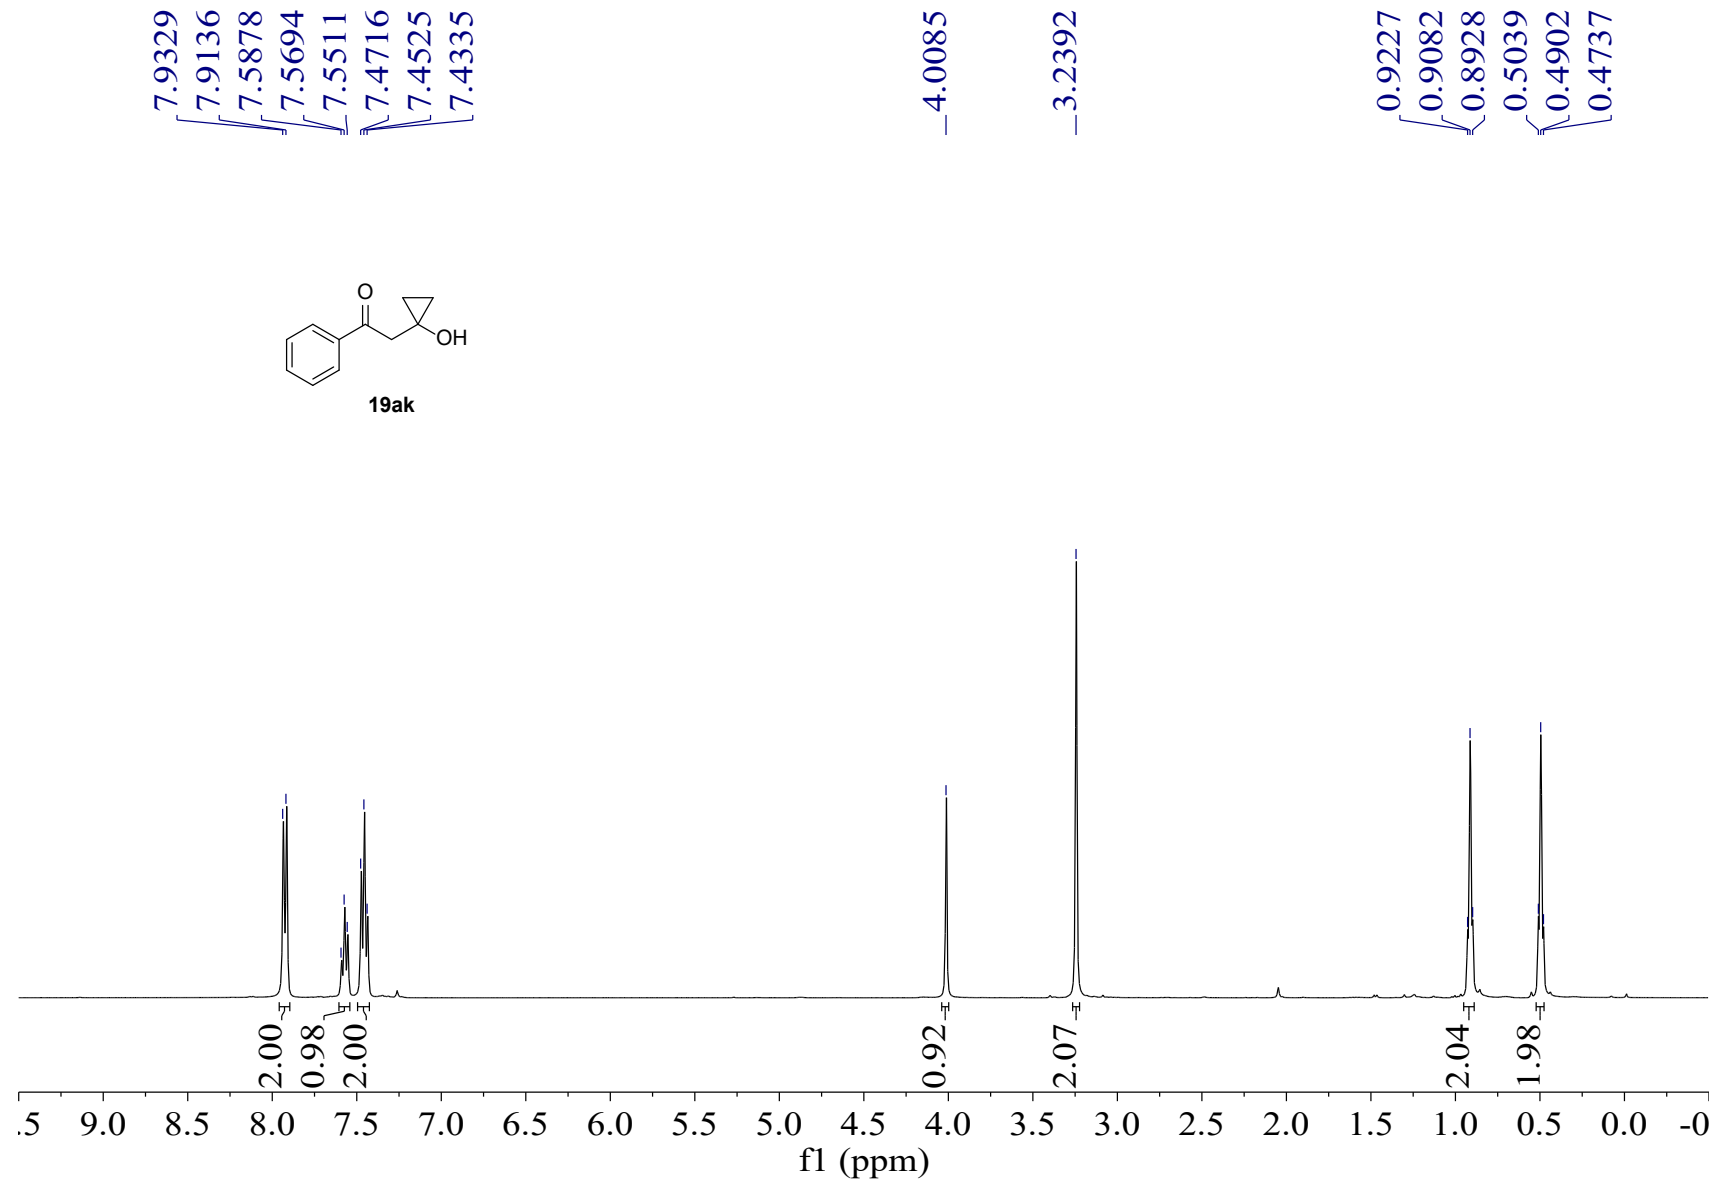

<sup>1</sup>H NMR spectrum of compound **19ak**

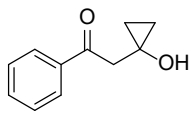

19ak

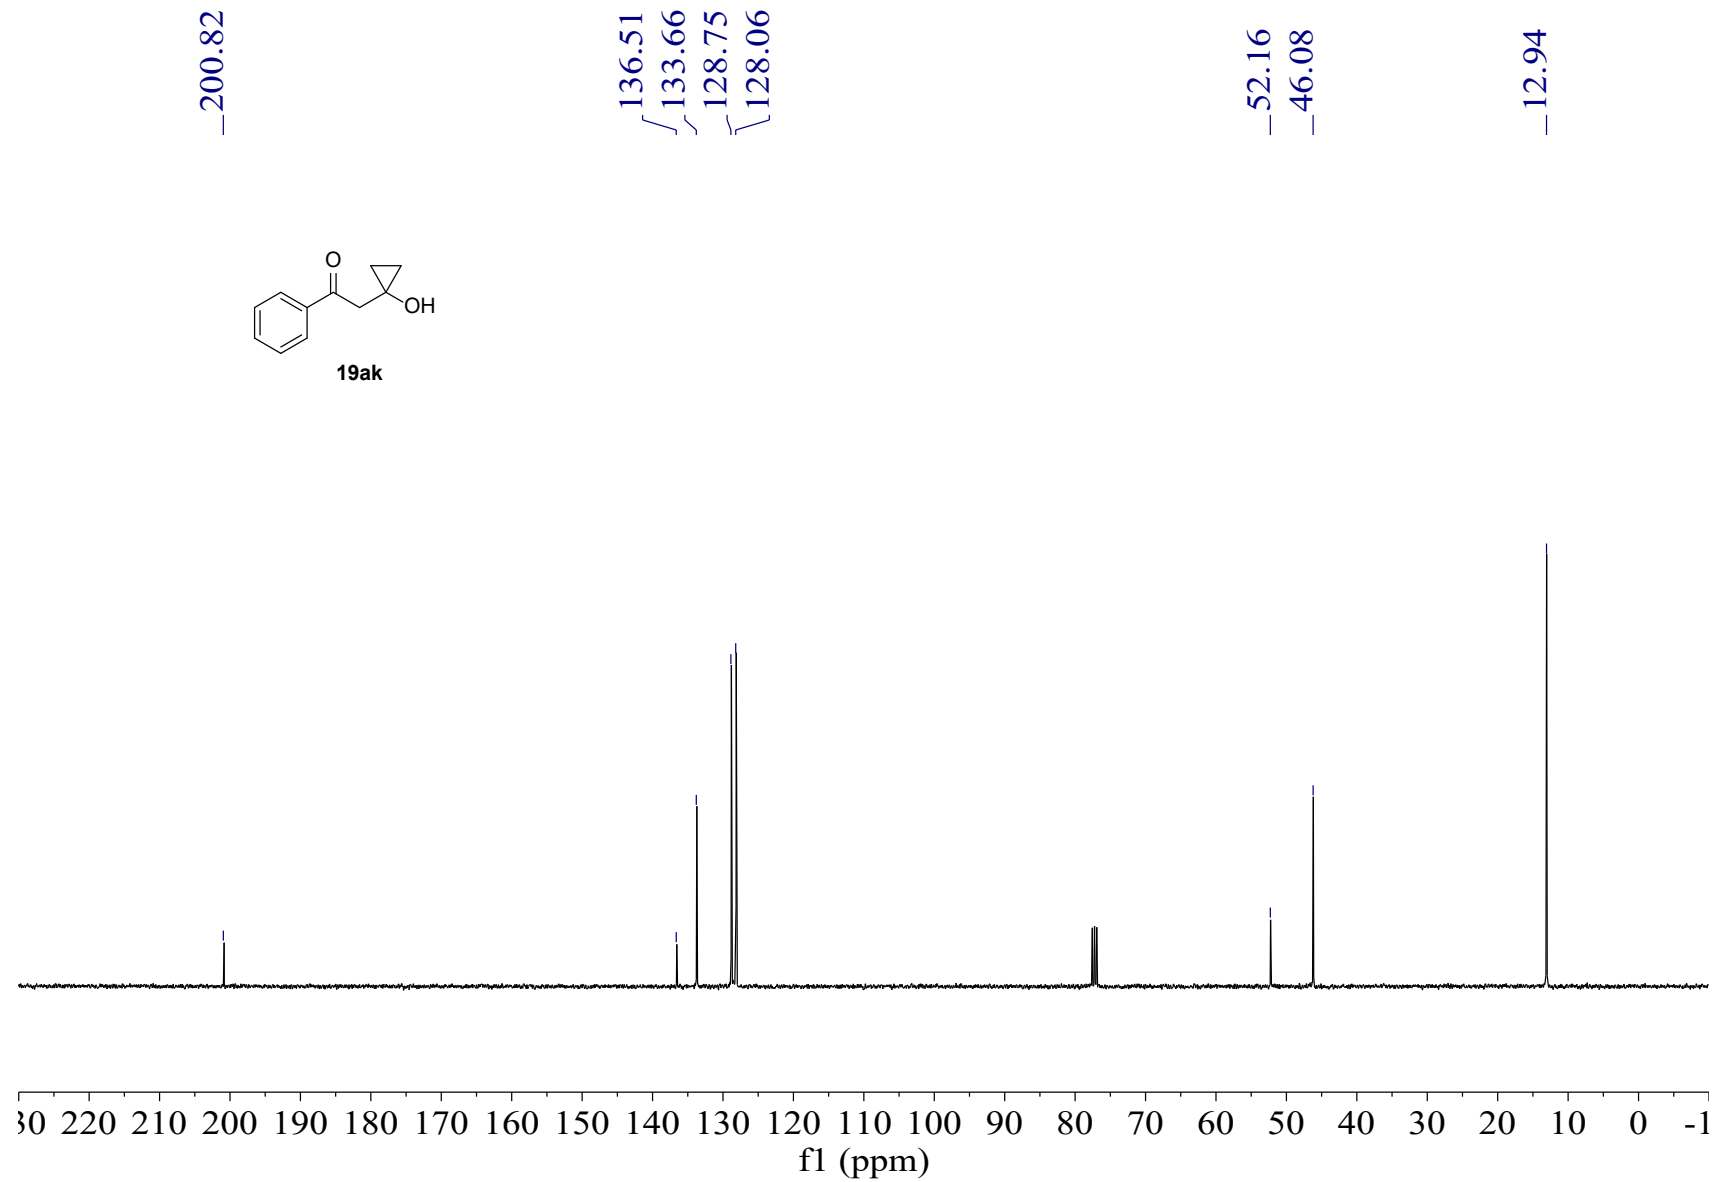

<sup>13</sup>C NMR spectrum of compound 19ak

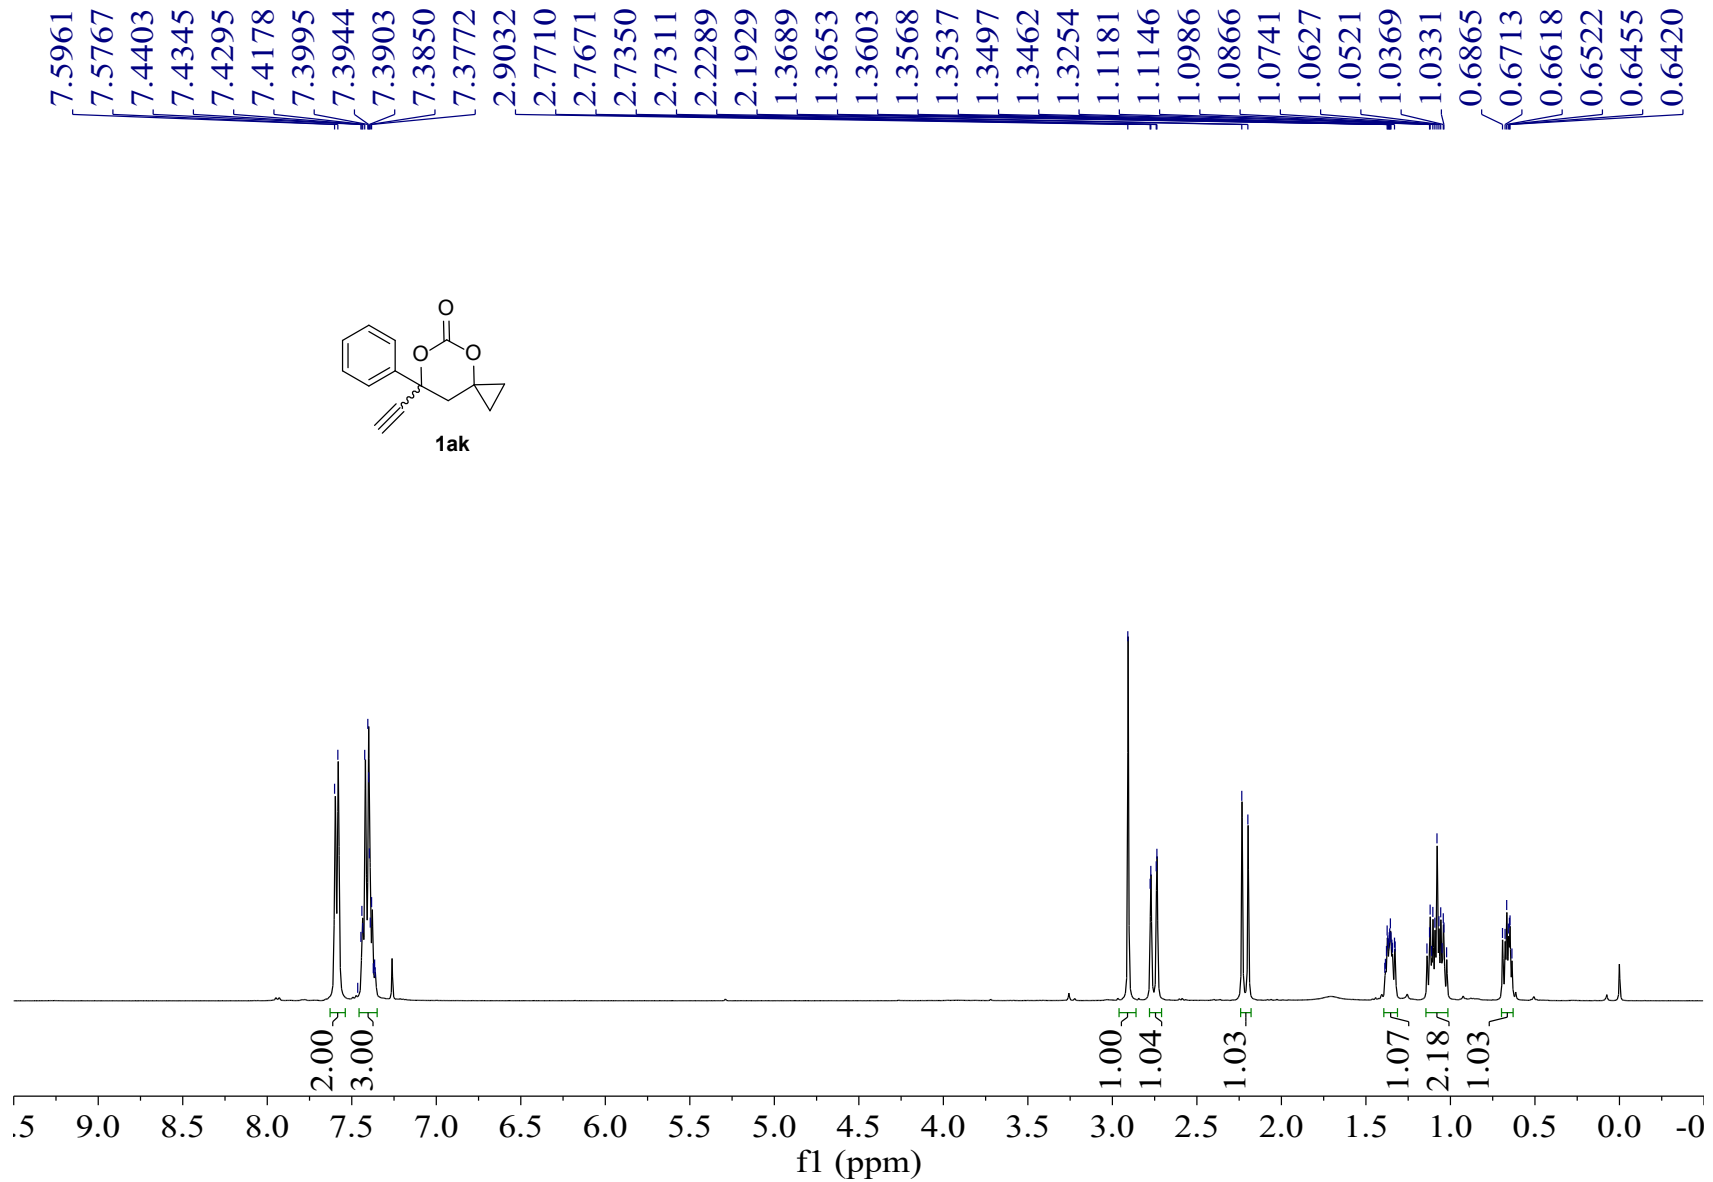

<sup>1</sup>H NMR spectrum of compound **1ak**



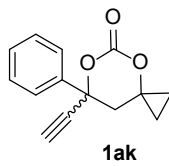

148.50  
139.45  
129.20  
128.83  
125.02

81.22  
79.57  
77.94

61.56

41.58

13.49  
9.84

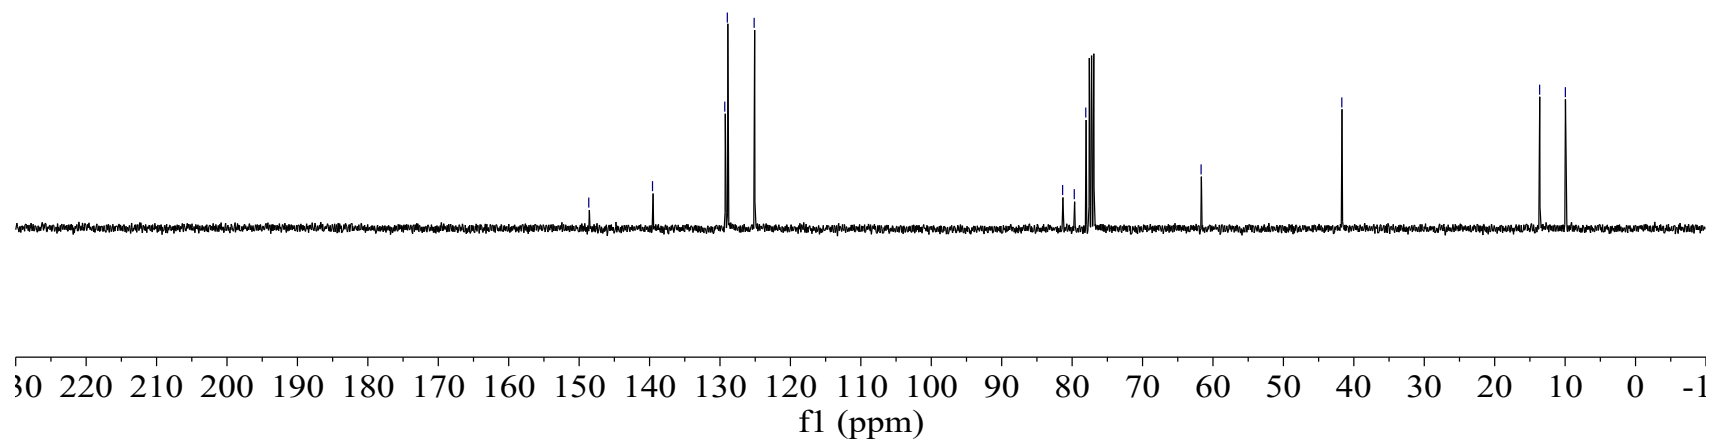

<sup>13</sup>C NMR spectrum of compound **1ak**

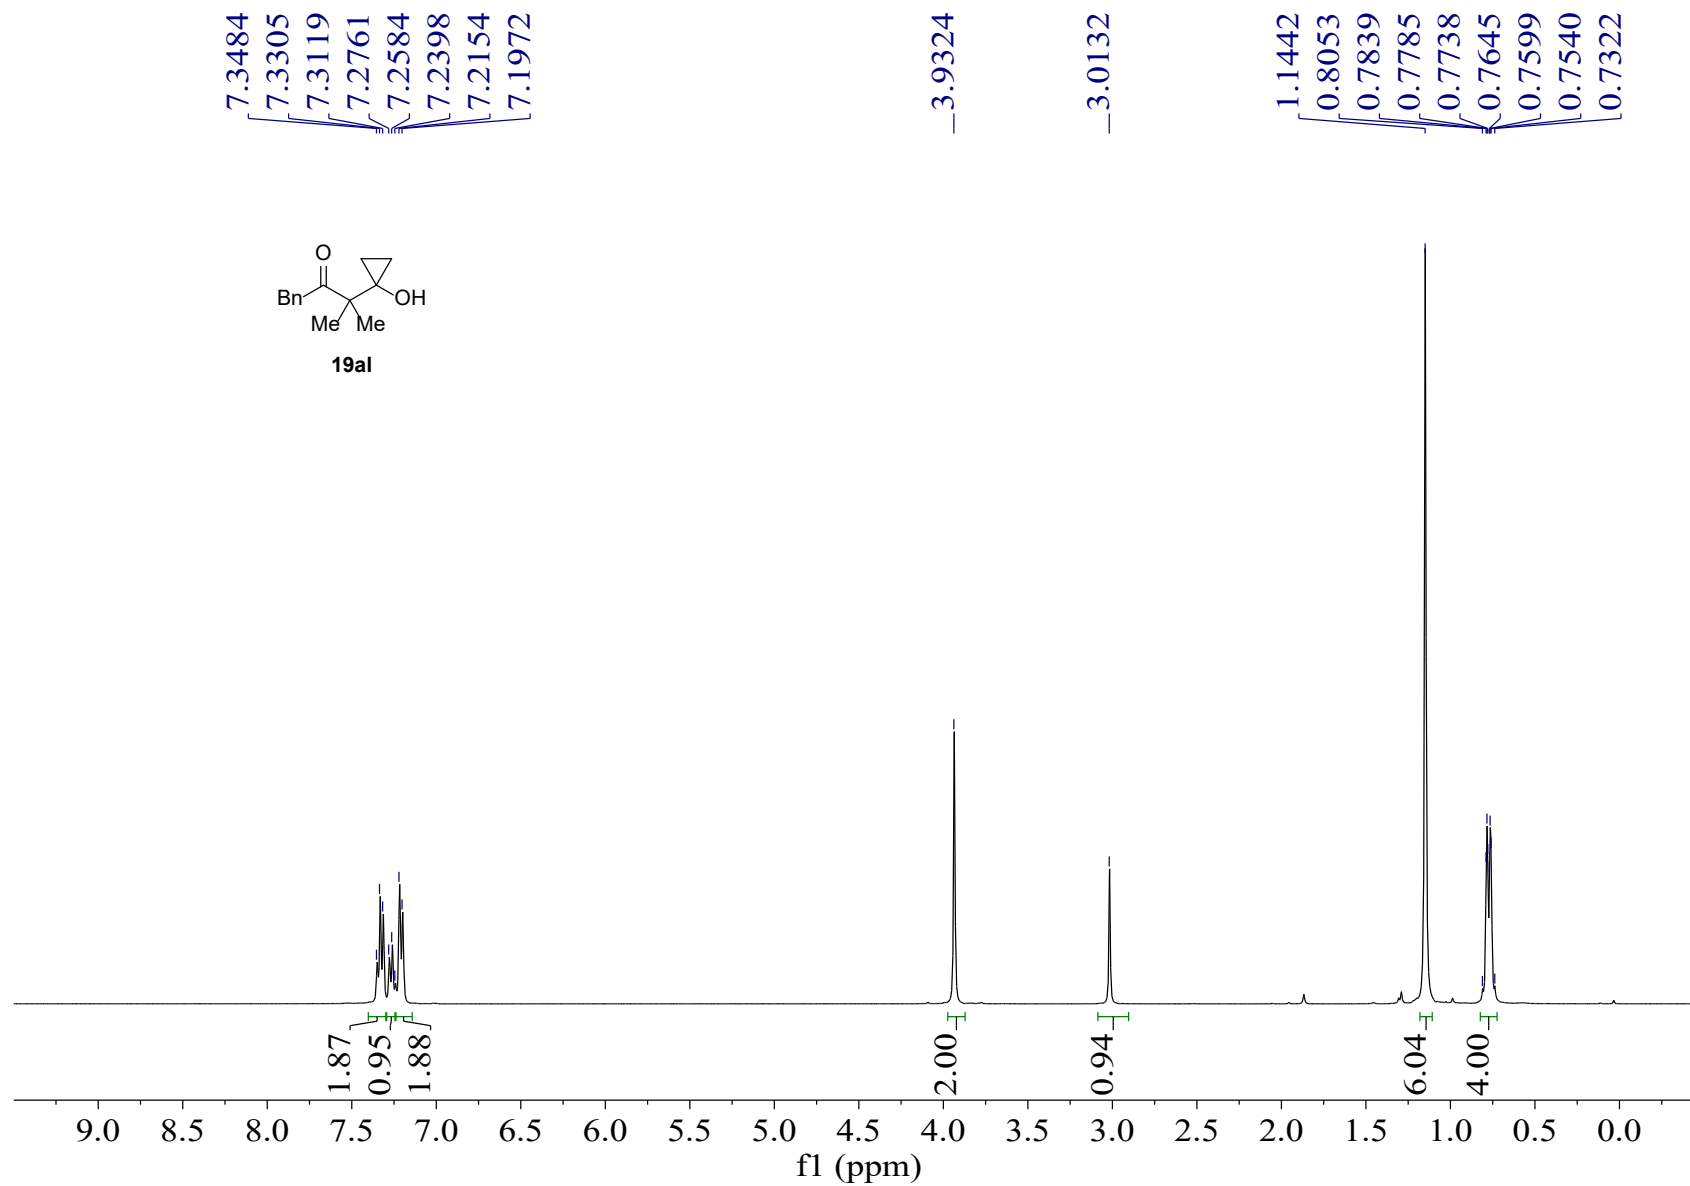

<sup>1</sup>H NMR spectrum of compound **19al**

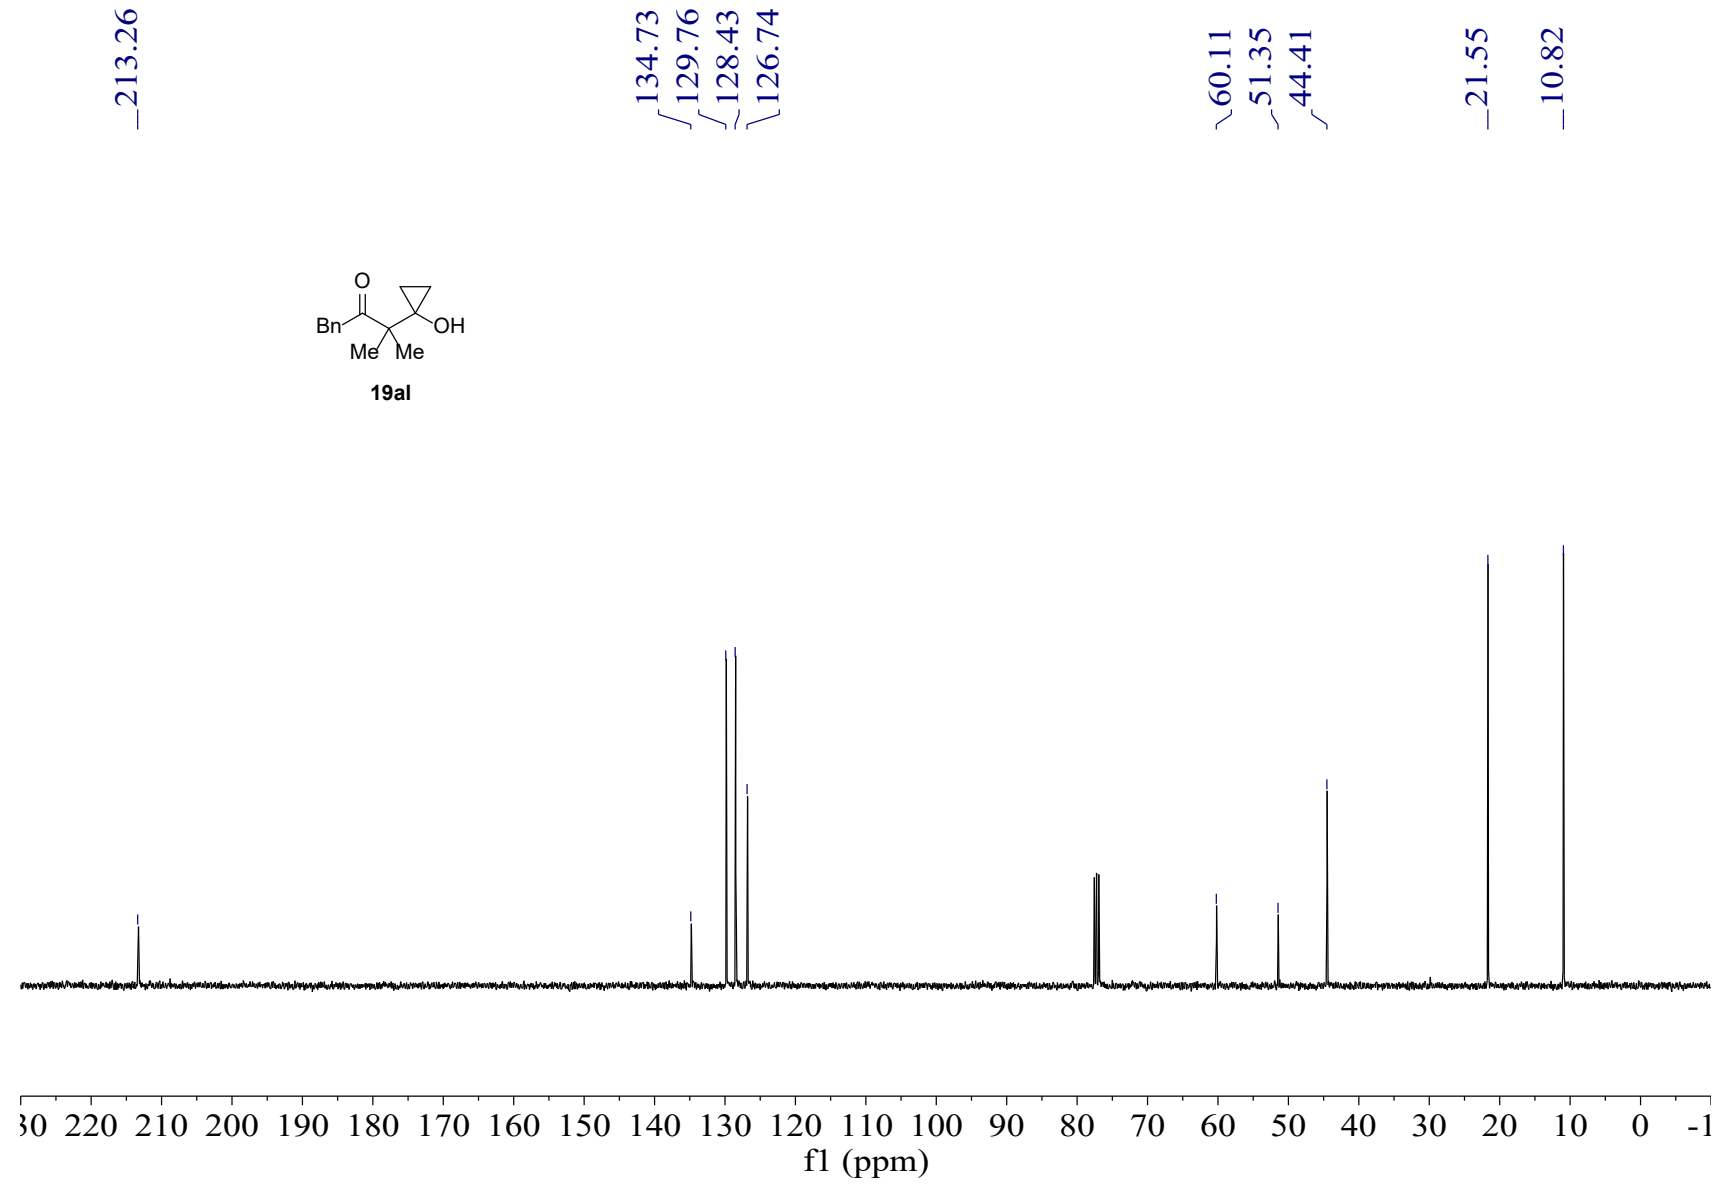

**<sup>13</sup>C NMR spectrum of compound 19al**

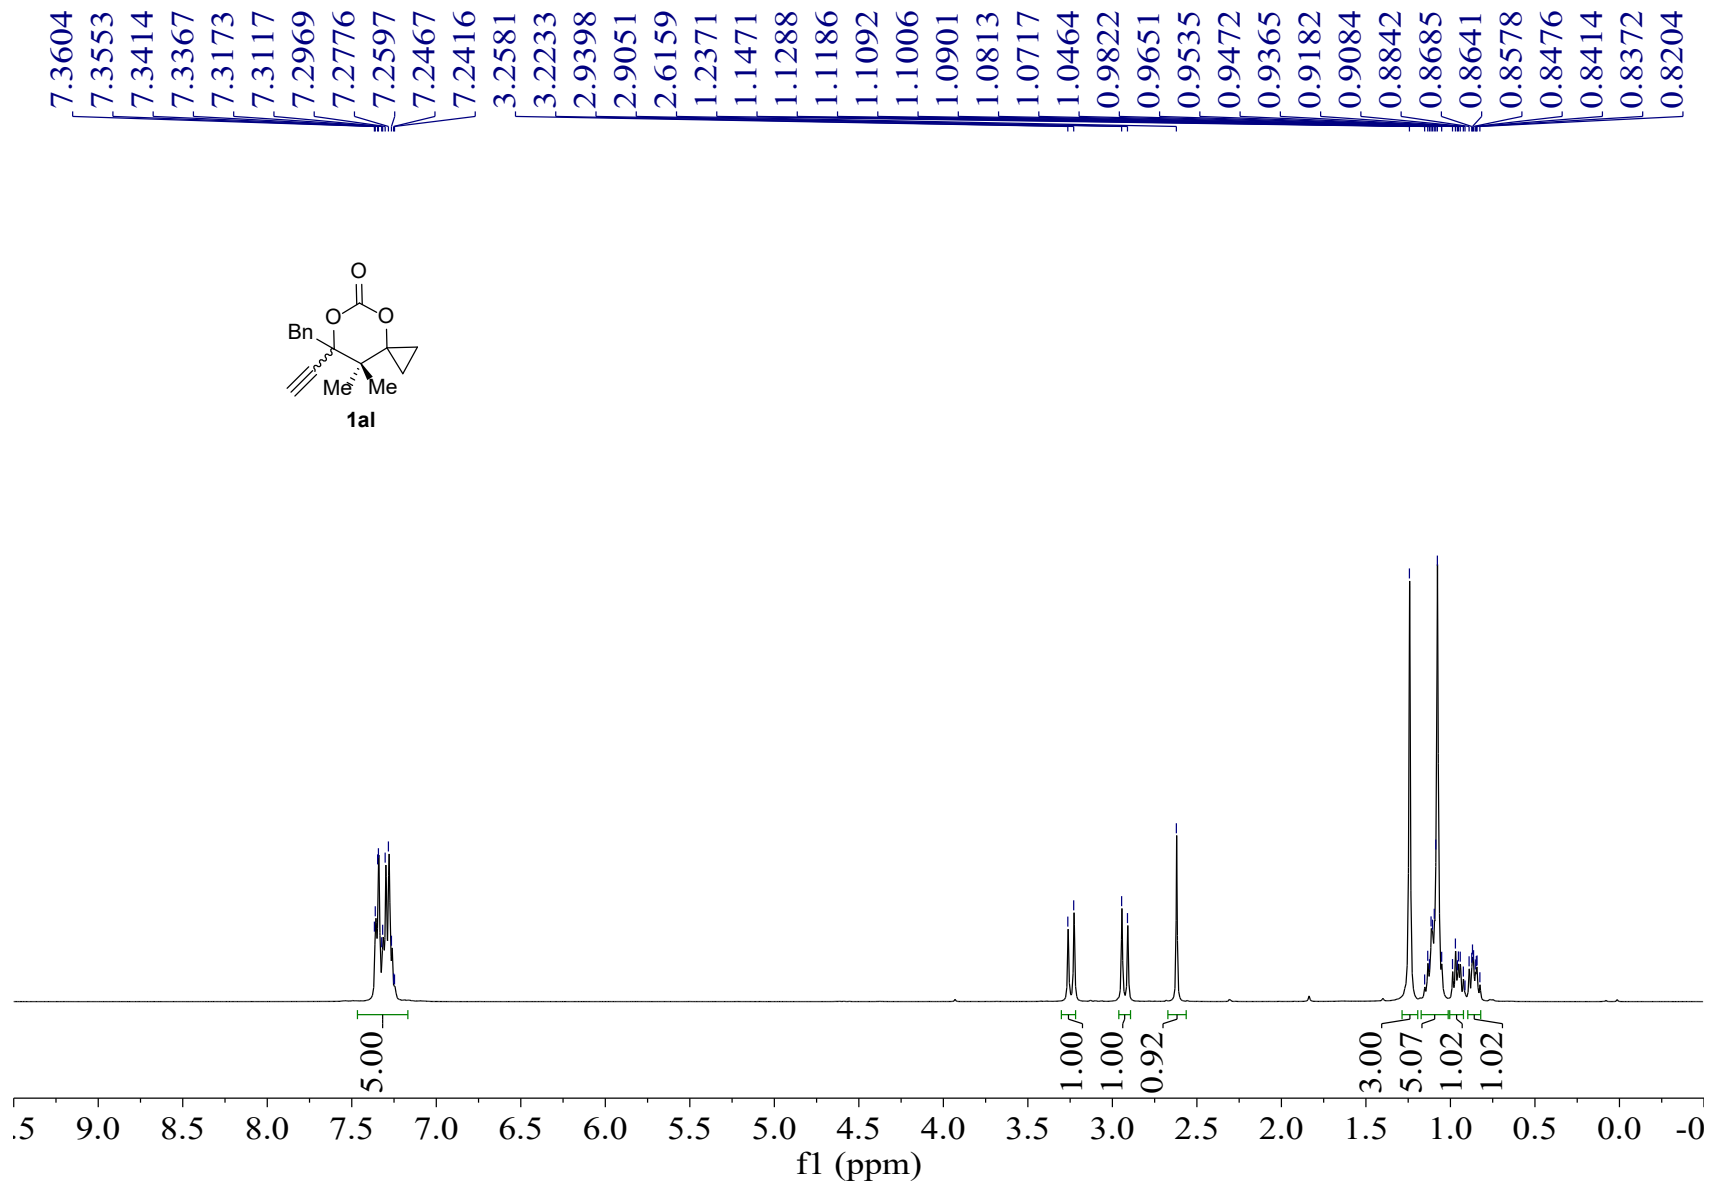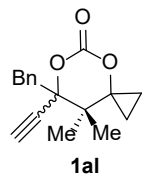

<sup>1</sup>H NMR spectrum of compound **1aI**

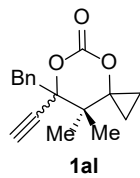

147.65  
 134.09  
 131.09  
 127.77  
 127.01

85.09  
 79.32  
 79.02  
 69.89

41.18  
 36.84

19.95  
 19.30  
 11.10  
 7.77

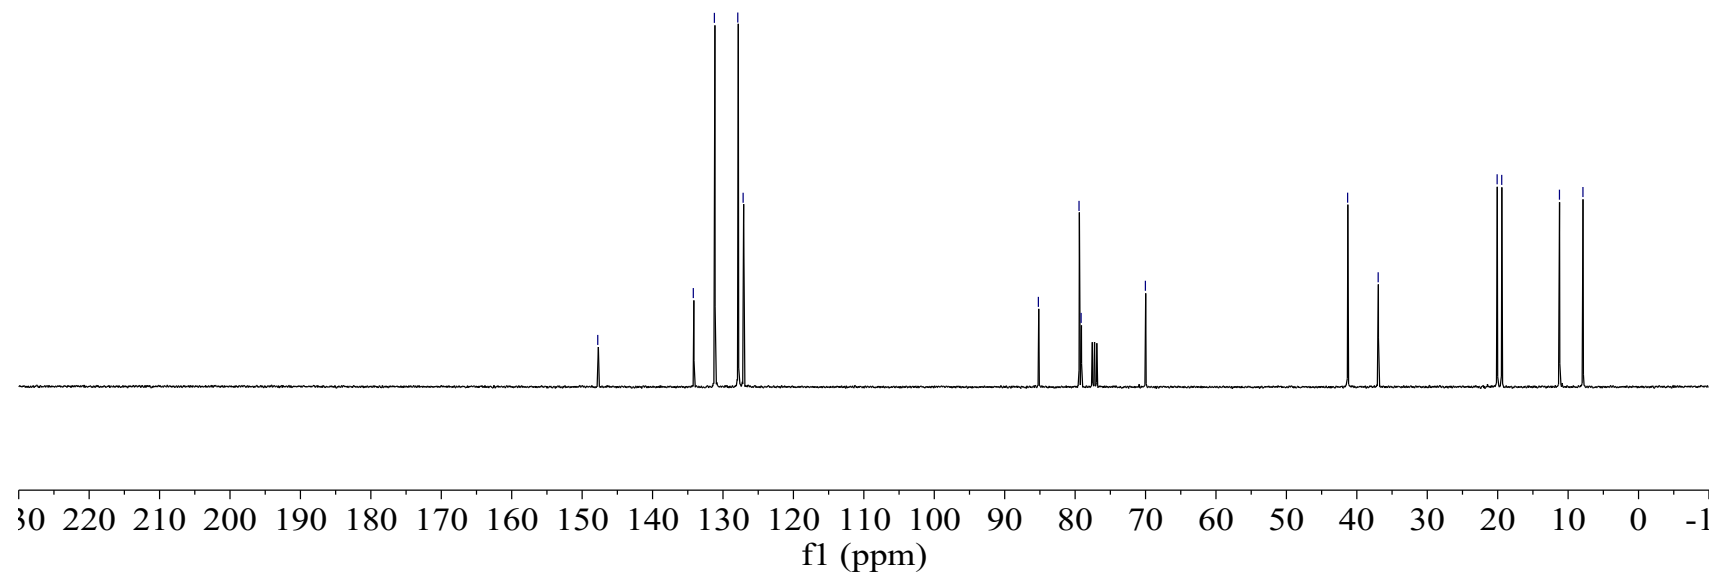

<sup>13</sup>C NMR spectrum of compound **1al**

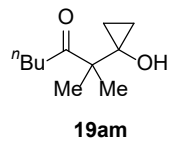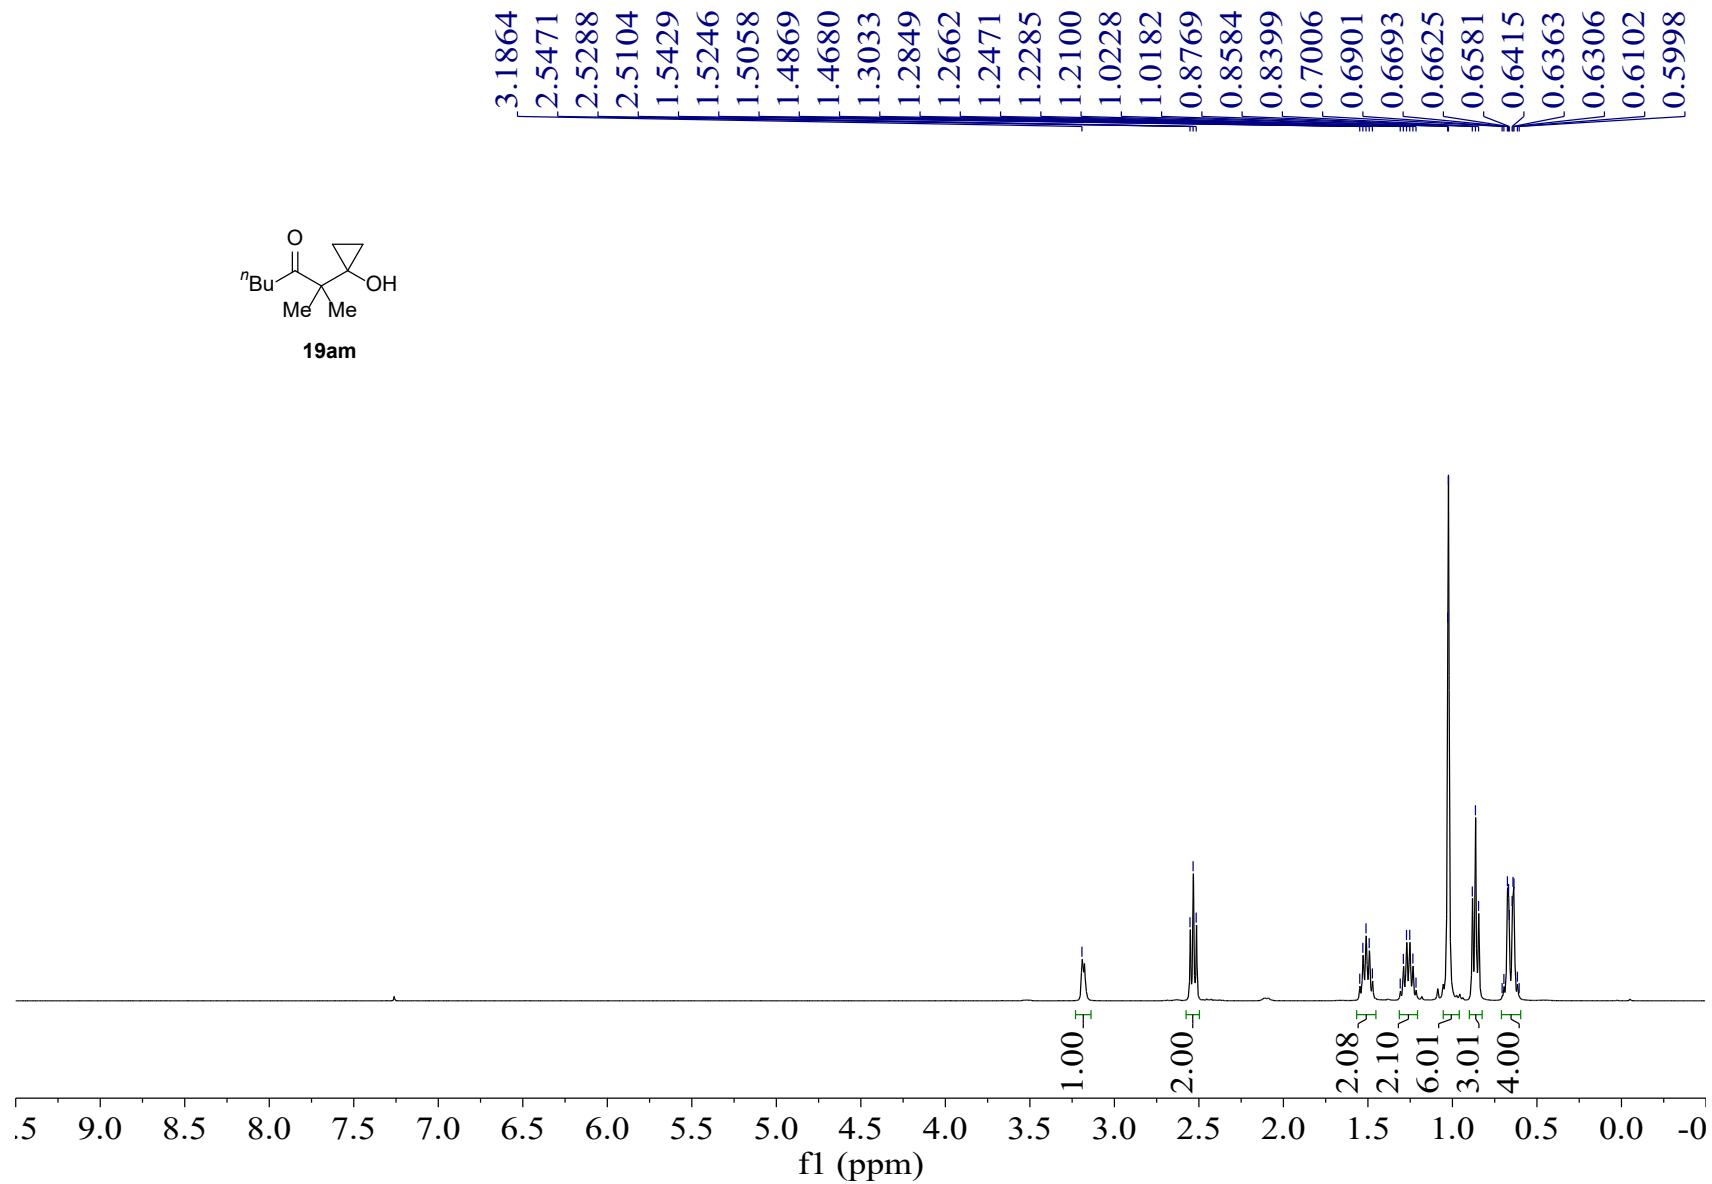

<sup>1</sup>H NMR spectrum of compound **19am**

216.57

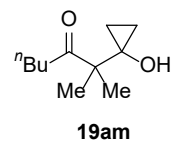

60.01  
50.76  
37.45  
25.86  
22.43  
21.58  
14.01  
10.58

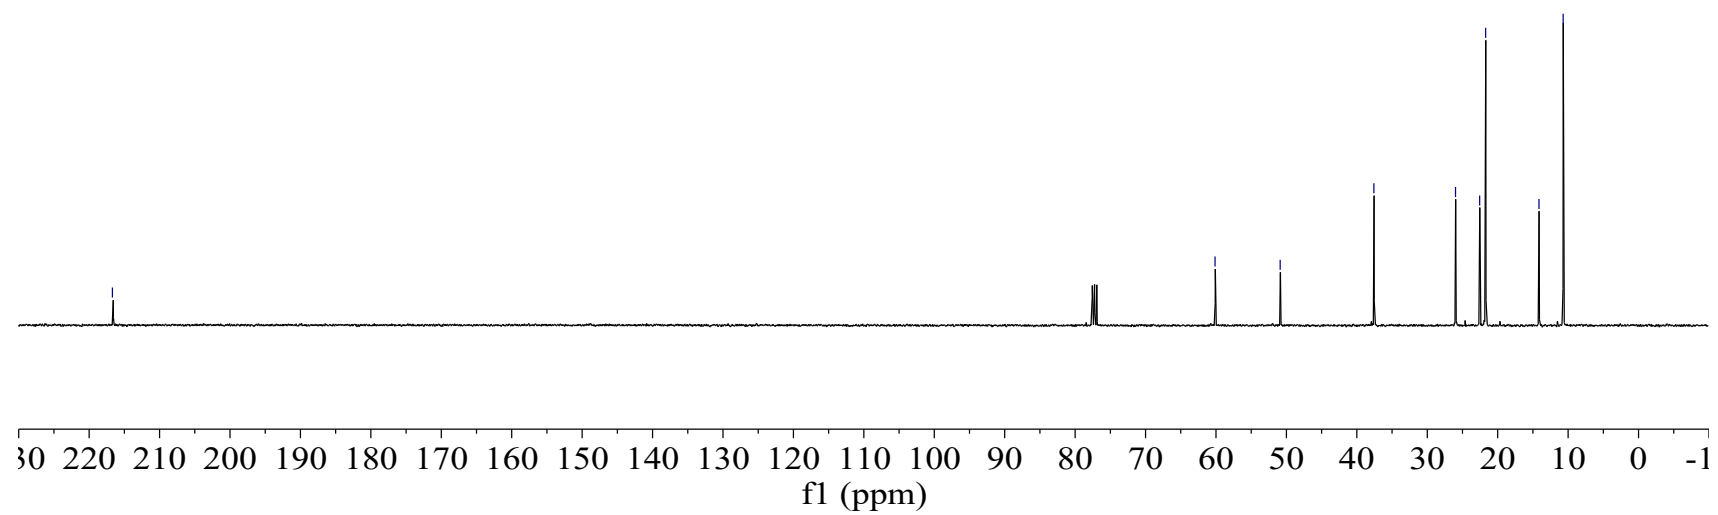

<sup>13</sup>C NMR spectrum of compound **19am**

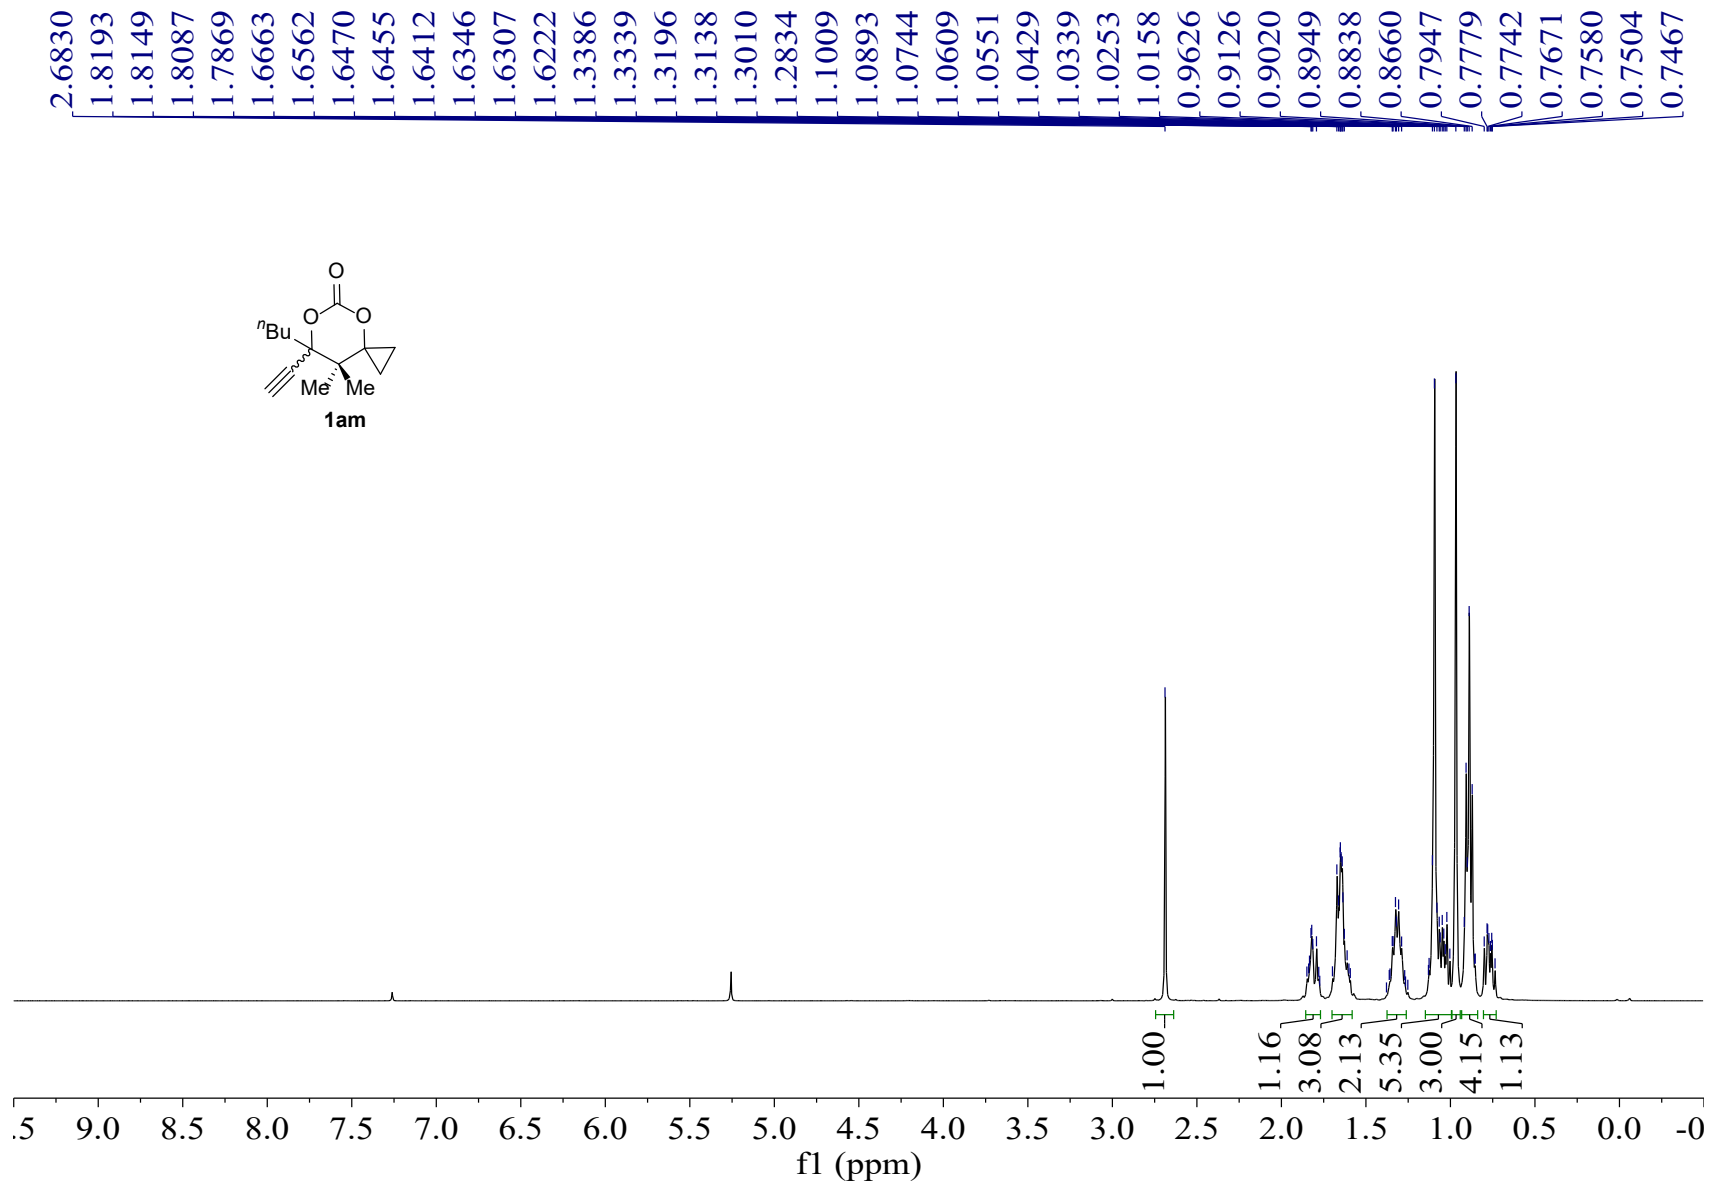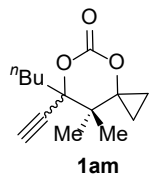

<sup>1</sup>H NMR spectrum of compound **1am**



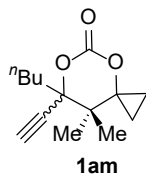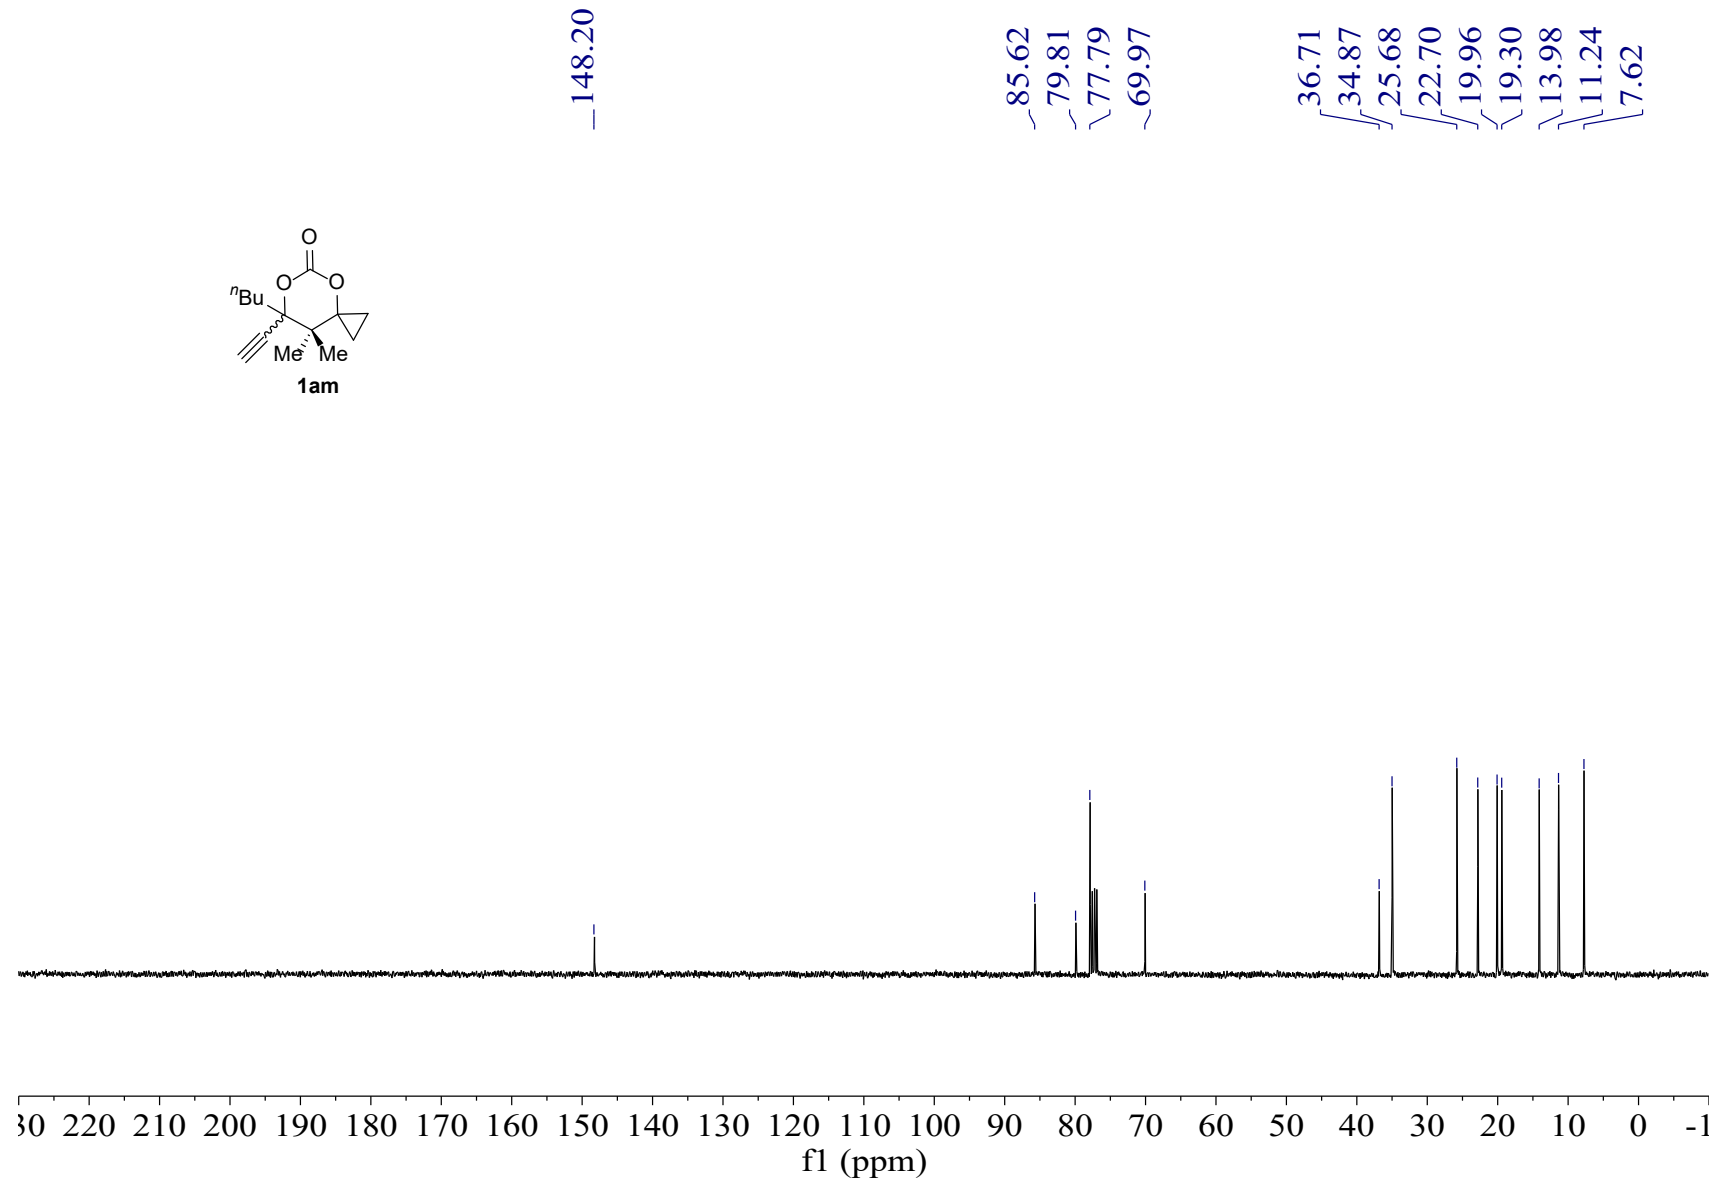

<sup>13</sup>C NMR spectrum of compound **1am**
